# Supplementary material
Source: ML conference proceedings conference paper supplement (https://aclanthology.org/N18-1059)
Supplement: Datasets [file N18-1059.Datasets.zip]

Archive with 11 entries (10 files):
- ComplexWebQuestions_dev.json
- __MACOSX/
- __MACOSX/._ComplexWebQuestions_dev.json
- ComplexWebQuestions_test.json
- __MACOSX/._ComplexWebQuestions_test.json
- ComplexWebQuestions_train.json
- __MACOSX/._ComplexWebQuestions_train.json
- README.txt
- __MACOSX/._README.txt
- supplementary-material-web.pdf
- __MACOSX/._supplementary-material-web.pdf
