# Supplementary material
Source: ML conference proceedings conference paper supplement (https://aclanthology.org/N18-1059)
Supplement: Datasets [file N18-1059.Datasets.zip › ComplexWebQuestions_dev.json]

[
    {
        "ID": "WebQTest-213_044320b87059a1cd4aacb661d9c6512a", 
        "webqsp_ID": "WebQTest-213", 
        "webqsp_question": "who did scarlett johansson date", 
        "machine_question": "who did scarlett johansson date and is the artist had a concert tour named Justified and Stripped Tour", 
        "question": "Which artist had the \"Justified and Stripped Tour\" and dated Scarlett Johansson?", 
        "sparql": "PREFIX ns: <http://rdf.freebase.com/ns/>\nSELECT DISTINCT ?x\nWHERE {\nFILTER (?x != ns:m.02114t)\nFILTER (!isLiteral(?x) OR lang(?x) = '' OR langMatches(lang(?x), 'en'))\nns:m.02114t ns:base.popstra.celebrity.dated ?y .\n?y ns:base.popstra.dated.participant ?x .\n?x ns:music.artist.concert_tours ns:m.027vqy0 . \n}", 
        "compositionality_type": "conjunction", 
        "answers": [
            {
                "answer": "Justin Timberlake", 
                "answer_id": "m.0j1yf", 
                "aliases": [
                    "Justin Randall", 
                    "JT", 
                    "Dzhastin Timberleyk", 
                    "J. Timberlake", 
                    "Tennman", 
                    "Justin Timberlake", 
                    "Justin Randall Timberlake"
                ]
            }
        ], 
        "created": "2018-02-13T02:59:24"
    }, 
    {
        "ID": "WebQTest-227_271ae920c5ba741693d747e1b8efdbee", 
        "webqsp_ID": "WebQTest-227", 
        "webqsp_question": "where were the seneca indians located", 
        "machine_question": "where were the seneca indians located and the religious leader is William Lauder", 
        "question": "Where is the religious leader named William Lauder and the place where the Seneca Indians were located?", 
        "sparql": "PREFIX ns: <http://rdf.freebase.com/ns/>\nSELECT DISTINCT ?x\nWHERE {\nFILTER (?x != ns:m.028yj0)\nFILTER (!isLiteral(?x) OR lang(?x) = '' OR langMatches(lang(?x), 'en'))\nns:m.028yj0 ns:people.ethnicity.geographic_distribution ?x .\n?x ns:religion.religious_leadership_jurisdiction.leader ?c .\n?c ns:religion.religious_organization_leadership.leader ns:m.0yt2j0q . \n}", 
        "compositionality_type": "conjunction", 
        "answers": [
            {
                "answer": "Ontario", 
                "answer_id": "m.05kr_", 
                "aliases": [
                    "Province D' Ontario", 
                    "ON", 
                    "Province D\u2019 Ontario", 
                    "Province Of Ontario"
                ]
            }
        ], 
        "created": "2018-02-13T03:01:58"
    }, 
    {
        "ID": "WebQTrn-3440_682800b1263c4a6d5b650e4196fc2b7d", 
        "webqsp_ID": "WebQTrn-3440", 
        "webqsp_question": "what should i visit in venice", 
        "machine_question": "what should i visit in venice and the location time zone is Central European Time Zone", 
        "question": "What main tourist attractions should I visit in Venice within the Central European Time Zone?", 
        "sparql": "PREFIX ns: <http://rdf.freebase.com/ns/>\nSELECT DISTINCT ?x\nWHERE {\nFILTER (?x != ns:m.07_pf)\nFILTER (!isLiteral(?x) OR lang(?x) = '' OR langMatches(lang(?x), 'en'))\nns:m.07_pf ns:travel.travel_destination.tourist_attractions ?x .\n?x ns:location.location.time_zones ns:m.02llzg . \n}", 
        "compositionality_type": "conjunction", 
        "answers": [
            {
                "answer": "Saint Mark's Basilica", 
                "answer_id": "m.01d_55", 
                "aliases": [
                    "Basilica Cattedrale Patriarcale di San Marco", 
                    "Basilica di San Marco", 
                    "Saint Mark's Basilica, Venice", 
                    "St Mark's Basilica", 
                    "The Patriarchal Cathedral Basilica of Saint Mark"
                ]
            }, 
            {
                "answer": "Lido di Venezia", 
                "answer_id": "m.07s5md0", 
                "aliases": []
            }, 
            {
                "answer": "Palazzo Grassi", 
                "answer_id": "m.0cc21s", 
                "aliases": [
                    "Palazzo Grassi, Venice", 
                    "Palazzo Grassi-Stucky"
                ]
            }, 
            {
                "answer": "Palazzo Venier dei Leoni", 
                "answer_id": "m.0jw_d8z", 
                "aliases": [
                    "Peggy Guggenheim Collection"
                ]
            }, 
            {
                "answer": "Piazza San Marco", 
                "answer_id": "m.0pr3n", 
                "aliases": [
                    "Piazza San Marco, Venice"
                ]
            }, 
            {
                "answer": "Doge's Palace", 
                "answer_id": "m.0q41z", 
                "aliases": [
                    "Palazzo Ducale", 
                    "Palazzo Ducale, Venice"
                ]
            }
        ], 
        "created": "2018-02-13T01:56:50"
    }, 
    {
        "ID": "WebQTrn-658_894fd8dc00cf831fe75187abd587b8aa", 
        "webqsp_ID": "WebQTrn-658", 
        "webqsp_question": "what main language do they speak in brazil", 
        "machine_question": "what main language do they speak in the country that contains Pernambuco", 
        "question": "What is the predominant tongue used in the nation that's the site of Pemambuco?", 
        "sparql": "PREFIX ns: <http://rdf.freebase.com/ns/>\nSELECT DISTINCT ?x\nWHERE {\nFILTER (?x != ?c)\nFILTER (!isLiteral(?x) OR lang(?x) = '' OR langMatches(lang(?x), 'en'))\n?c ns:location.country.administrative_divisions ns:m.01hdpp . \n?c ns:location.country.official_language ?x .\n}\n", 
        "compositionality_type": "composition", 
        "answers": [
            {
                "answer": "Portuguese Language", 
                "answer_id": "m.05zjd", 
                "aliases": [
                    "Portuguese", 
                    "Portugese", 
                    "Portuguese language", 
                    "Portugu\u00eas"
                ]
            }
        ], 
        "created": "2018-02-12T20:52:25"
    }, 
    {
        "ID": "WebQTrn-906_c1e90e420c74912ec4708f517dafd72b", 
        "webqsp_ID": "WebQTrn-906", 
        "webqsp_question": "what time is nebraska now", 
        "machine_question": "what time is the us state that has a capital named Lincoln now", 
        "question": "What time zone is in the US State with capital named Lincoln?", 
        "sparql": "PREFIX ns: <http://rdf.freebase.com/ns/>\nSELECT DISTINCT ?x\nWHERE {\nFILTER (?x != ?c)\nFILTER (!isLiteral(?x) OR lang(?x) = '' OR langMatches(lang(?x), 'en'))\n?c ns:location.us_state.capital ns:m.04gxf . \n?c ns:location.location.time_zones ?x .\n}\n", 
        "compositionality_type": "composition", 
        "answers": [
            {
                "answer": "Central Time Zone", 
                "answer_id": "m.02fqwt", 
                "aliases": [
                    "Central Standard Time", 
                    "Central Time", 
                    "Central Daylight Time", 
                    "Central Standard Time Zone"
                ]
            }, 
            {
                "answer": "Mountain Time Zone", 
                "answer_id": "m.02hczc", 
                "aliases": [
                    "Mountain Standard Time Zone", 
                    "Mountain Time"
                ]
            }
        ], 
        "created": "2018-02-12T21:19:46"
    }, 
    {
        "ID": "WebQTrn-690_ac8783214291dd6266059cb275378880", 
        "webqsp_ID": "WebQTrn-690", 
        "webqsp_question": "who all has jason kidd played for", 
        "machine_question": "who all has jason kidd played for and the basket ball team head coach is Rick Carlisle", 
        "question": "What team with head coach Rick Carlisle did Jason Kidd play for?", 
        "sparql": "PREFIX ns: <http://rdf.freebase.com/ns/>\nSELECT DISTINCT ?x\nWHERE {\nFILTER (?x != ns:m.02cg2v)\nFILTER (!isLiteral(?x) OR lang(?x) = '' OR langMatches(lang(?x), 'en'))\nns:m.02cg2v ns:sports.pro_athlete.teams ?y .\n?y ns:sports.sports_team_roster.team ?x .\n?x ns:basketball.basketball_team.head_coach ns:m.02zxw4 . \n}", 
        "compositionality_type": "conjunction", 
        "answers": [
            {
                "answer": "Dallas Mavericks", 
                "answer_id": "m.0jmcv", 
                "aliases": [
                    "Mavs", 
                    "Mavericks"
                ]
            }
        ], 
        "created": "2018-02-12T20:56:28"
    }, 
    {
        "ID": "WebQTrn-731_d2fb25308e1871367a2ffcc8527989fa", 
        "webqsp_ID": "WebQTrn-731", 
        "webqsp_question": "how many languages are there in the philippines", 
        "machine_question": "how many languages are there in the the country that contains Agusan del Sur", 
        "question": "The country that contains Agusan del Sur has how many languages?", 
        "sparql": "PREFIX ns: <http://rdf.freebase.com/ns/>\nSELECT DISTINCT ?x\nWHERE {\nFILTER (?x != ?c)\nFILTER (!isLiteral(?x) OR lang(?x) = '' OR langMatches(lang(?x), 'en'))\n?c ns:location.country.administrative_divisions ns:m.01nk2j . \n?c ns:location.country.languages_spoken ?x .\n}\n", 
        "compositionality_type": "composition", 
        "answers": [
            {
                "answer": "Filipino language", 
                "answer_id": "m.01jb8r", 
                "aliases": [
                    "Filipino"
                ]
            }, 
            {
                "answer": "Cebuano language", 
                "answer_id": "m.01zfd7", 
                "aliases": [
                    "Bisayan", 
                    "Sugbuhanon", 
                    "Sugbuanon", 
                    "Cebuano Language", 
                    "Sebuano", 
                    "\u30f4\u30a3\u30b5\u30e4\u8a9e", 
                    "\u30bb\u30d6\u8a9e", 
                    "Visayan", 
                    "Binisaya", 
                    "\u30d3\u30b5\u30e4\u8a9e", 
                    "Cebuano"
                ]
            }, 
            {
                "answer": "Ilokano language", 
                "answer_id": "m.025hmd", 
                "aliases": [
                    "Ilokano", 
                    "Ilocano", 
                    "Iloko", 
                    "Ilocano Language"
                ]
            }, 
            {
                "answer": "English Language", 
                "answer_id": "m.02h40lc", 
                "aliases": [
                    "Sekgoa", 
                    "Anglit", 
                    "English language", 
                    "English"
                ]
            }, 
            {
                "answer": "Waray-Waray Language", 
                "answer_id": "m.02hxntx", 
                "aliases": [
                    "Samare\u00f1o", 
                    "Samar-leyte", 
                    "Waray-Waray", 
                    "Waray", 
                    "Samaran", 
                    "Binisaya", 
                    "Waray-Waray language"
                ]
            }, 
            {
                "answer": "Pangasinan Language", 
                "answer_id": "m.02p9hz", 
                "aliases": [
                    "Pangasinan"
                ]
            }, 
            {
                "answer": "Hiligaynon language", 
                "answer_id": "m.032db0", 
                "aliases": [
                    "Hiligainon", 
                    "Hiligaynon Language", 
                    "Ilonggo", 
                    "Hiligaynon", 
                    "\u30a4\u30ed\u30f3\u30b4\u8a9e", 
                    "Illogo"
                ]
            }, 
            {
                "answer": "Kapampangan language", 
                "answer_id": "m.03323g", 
                "aliases": [
                    "\u30ab\u30d1\u30f3\u30d1\u30f3\u30ac\u8a9e", 
                    "Kapampangan", 
                    "Capampan\u0360gan", 
                    "Pampangan", 
                    "Pampango", 
                    "Pampangue\u00f1o"
                ]
            }, 
            {
                "answer": "Tagalog language", 
                "answer_id": "m.07qv_", 
                "aliases": [
                    "Pilipino", 
                    "Filipino", 
                    "Tagalog", 
                    "Tagalog Language"
                ]
            }
        ], 
        "created": "2018-02-12T20:59:38"
    }, 
    {
        "ID": "WebQTrn-2539_b7b2e2a812931135ab913a8613e57c5c", 
        "webqsp_ID": "WebQTrn-2539", 
        "webqsp_question": "what team did albert pujols play for", 
        "machine_question": "what team did albert pujols play for and is the team won the 2002 World Series championship", 
        "question": "Which team for which Albert Pujols plays is the organization that won the 2002 World Series championship?", 
        "sparql": "PREFIX ns: <http://rdf.freebase.com/ns/>\nSELECT DISTINCT ?x\nWHERE {\nFILTER (?x != ns:m.035gcb)\nFILTER (!isLiteral(?x) OR lang(?x) = '' OR langMatches(lang(?x), 'en'))\nns:m.035gcb ns:sports.pro_athlete.teams ?y .\n?y ns:sports.sports_team_roster.team ?x .\n?x ns:sports.sports_team.championships ns:m.0468cj . \n}", 
        "compositionality_type": "conjunction", 
        "answers": [
            {
                "answer": "Los Angeles Angels of Anaheim", 
                "answer_id": "m.04wmvz", 
                "aliases": [
                    "California Angels", 
                    "Los Angeles Angels", 
                    "Anaheim Angels"
                ]
            }
        ], 
        "created": "2018-02-13T00:06:32"
    }, 
    {
        "ID": "WebQTrn-495_26c929ed1d6e017b0c81c0cad7287568", 
        "webqsp_ID": "WebQTrn-495", 
        "webqsp_question": "what government system does north korea have", 
        "machine_question": "what government system does the country that contains South Hwanghae Province have", 
        "question": "South Hwanghae Province is part of the country with what government system?", 
        "sparql": "PREFIX ns: <http://rdf.freebase.com/ns/>\nSELECT DISTINCT ?x\nWHERE {\nFILTER (?x != ?c)\nFILTER (!isLiteral(?x) OR lang(?x) = '' OR langMatches(lang(?x), 'en'))\n?c ns:location.country.administrative_divisions ns:m.022g39 . \n?c ns:location.country.form_of_government ?x .\n}\n", 
        "compositionality_type": "composition", 
        "answers": [
            {
                "answer": "Juche", 
                "answer_id": "m.01gt0n", 
                "aliases": []
            }, 
            {
                "answer": "Socialist state", 
                "answer_id": "m.025tbxf", 
                "aliases": [
                    "Socialist", 
                    "Socialist Republic"
                ]
            }, 
            {
                "answer": "Single-party state", 
                "answer_id": "m.0py4y", 
                "aliases": [
                    "Single-party"
                ]
            }
        ], 
        "created": "2018-02-12T20:36:23"
    }, 
    {
        "ID": "WebQTrn-538_a725d13be16116bdc37bf5dd852e35b1", 
        "webqsp_ID": "WebQTrn-538", 
        "webqsp_question": "which countries does russia border", 
        "machine_question": "which countries does russia border and the location time zone is Eastern European Time Zone", 
        "question": "Of the countries which Russia borders, which countries have the time zone of Eastern European Time Zone?", 
        "sparql": "PREFIX ns: <http://rdf.freebase.com/ns/>\nSELECT DISTINCT ?x\nWHERE {\nFILTER (?x != ns:m.06bnz)\nFILTER (!isLiteral(?x) OR lang(?x) = '' OR langMatches(lang(?x), 'en'))\nns:m.06bnz ns:location.location.adjoin_s ?y .\n?y ns:location.adjoining_relationship.adjoins ?x .\n?x ns:common.topic.notable_types ns:m.01mp .\n?x ns:location.location.time_zones ns:m.03plfd . \n}", 
        "compositionality_type": "conjunction", 
        "answers": [
            {
                "answer": "Estonia", 
                "answer_id": "m.02kmm", 
                "aliases": [
                    "Estland", 
                    "Republic of Estonia"
                ]
            }, 
            {
                "answer": "Finland", 
                "answer_id": "m.02vzc", 
                "aliases": [
                    "Suomi", 
                    "Republic of Finland"
                ]
            }, 
            {
                "answer": "Latvia", 
                "answer_id": "m.04g5k", 
                "aliases": [
                    "Lettland", 
                    "Republic of Latvia"
                ]
            }, 
            {
                "answer": "Lithuania", 
                "answer_id": "m.04gzd", 
                "aliases": [
                    "Republic of Lithuania", 
                    "Lietuva", 
                    "Lietuvos Respublika", 
                    "Litauen"
                ]
            }, 
            {
                "answer": "Ukraine", 
                "answer_id": "m.07t21", 
                "aliases": [
                    "Ukraine Region"
                ]
            }
        ], 
        "created": "2018-02-12T20:41:49"
    }, 
    {
        "ID": "WebQTrn-1444_91142cfb73695a1f7a75f96d6720fe46", 
        "webqsp_ID": "WebQTrn-1444", 
        "webqsp_question": "when was the last time the oakland raiders won the super bowl", 
        "machine_question": "when was the last time the the team won the Super Bowl XI championship won the super bowl", 
        "question": "When was the last time the champion of Super Bowl XI win the Super Bowl?", 
        "sparql": "PREFIX ns: <http://rdf.freebase.com/ns/>\nSELECT DISTINCT ?x\nWHERE {\nFILTER (?x != ?c)\nFILTER (!isLiteral(?x) OR lang(?x) = '' OR langMatches(lang(?x), 'en'))\n?c ns:sports.sports_team.championships ns:m.076ps . \n?c ns:sports.sports_team.championships ?x .\n?x ns:common.topic.notable_types ns:m.01xljv1 .\n?x ns:time.event.end_date ?sk0 .\n}\nORDER BY DESC(xsd:datetime(?sk0))\nLIMIT 1\n", 
        "compositionality_type": "composition", 
        "answers": [
            {
                "answer": "Super Bowl XVIII", 
                "answer_id": "m.076s5", 
                "aliases": []
            }
        ], 
        "created": "2018-02-12T22:18:54"
    }, 
    {
        "ID": "WebQTrn-2993_ab59664a45db1185a267f1a4588036de", 
        "webqsp_ID": "WebQTrn-2993", 
        "webqsp_question": "what currency should i take to mauritius", 
        "machine_question": "what currency should i take to the currency used in the country is Mauritian rupee", 
        "question": "What currency is used in the country that uses Mauritian rupee?", 
        "sparql": "PREFIX ns: <http://rdf.freebase.com/ns/>\nSELECT DISTINCT ?x\nWHERE {\nFILTER (?x != ?c)\nFILTER (!isLiteral(?x) OR lang(?x) = '' OR langMatches(lang(?x), 'en'))\n?c ns:location.country.currency_used ns:m.02scxb . \n?c ns:location.country.currency_used ?x .\n}\n", 
        "compositionality_type": "composition", 
        "answers": [
            {
                "answer": "Mauritian rupee", 
                "answer_id": "m.02scxb", 
                "aliases": []
            }
        ], 
        "created": "2018-02-13T01:00:22"
    }, 
    {
        "ID": "WebQTrn-2663_942f14dfac2d0088e3d1294453518205", 
        "webqsp_ID": "WebQTrn-2663", 
        "webqsp_question": "who all has kim kardashian dated", 
        "machine_question": "who all has kim kardashian dated and is the player started his career on 2006", 
        "question": "What person who dated Kim Kardashian is a sports player who begin his career in 2006?", 
        "sparql": "PREFIX ns: <http://rdf.freebase.com/ns/>\nSELECT DISTINCT ?x\nWHERE {\nFILTER (?x != ns:m.0261x8t)\nFILTER (!isLiteral(?x) OR lang(?x) = '' OR langMatches(lang(?x), 'en'))\nns:m.0261x8t ns:base.popstra.celebrity.dated ?y .\n?y ns:base.popstra.dated.participant ?x .\n?x ns:sports.pro_athlete.sports_played_professionally ?c .\n?c ns:sports.pro_sports_played.career_start \"2006\"^^xsd:dateTime . \n}", 
        "compositionality_type": "conjunction", 
        "answers": [
            {
                "answer": "Reggie Bush", 
                "answer_id": "m.05cb70", 
                "aliases": [
                    "Reggie", 
                    "The President", 
                    "Reginald Alfred Bush, Jr."
                ]
            }
        ], 
        "created": "2018-02-13T00:23:58"
    }, 
    {
        "ID": "WebQTrn-858_abb34e786f4e474a1f244d2d376456ae", 
        "webqsp_ID": "WebQTrn-858", 
        "webqsp_question": "which countries does south africa export to", 
        "machine_question": "which countries does the country that contains Limpopo export to", 
        "question": "The country that contains Limpopo exports to which countries?", 
        "sparql": "PREFIX ns: <http://rdf.freebase.com/ns/>\nSELECT DISTINCT ?x\nWHERE {\nFILTER (?x != ?c)\nFILTER (!isLiteral(?x) OR lang(?x) = '' OR langMatches(lang(?x), 'en'))\n?c ns:location.country.administrative_divisions ns:m.01_zrk . \n?c ns:location.statistical_region.places_exported_to ?y .\n?y ns:location.imports_and_exports.exported_to ?x .\n}\n", 
        "compositionality_type": "composition", 
        "answers": [
            {
                "answer": "Tanzania", 
                "answer_id": "m.07dzf", 
                "aliases": [
                    "Jamhuri ya Muungano wa Tanzania", 
                    "United Republic of Tanzania"
                ]
            }, 
            {
                "answer": "Angola", 
                "answer_id": "m.0j4b", 
                "aliases": []
            }
        ], 
        "created": "2018-02-12T21:14:13"
    }, 
    {
        "ID": "WebQTest-827_0ed55ab55fae21af5b4b03af90678e30", 
        "webqsp_ID": "WebQTest-827", 
        "webqsp_question": "what country does justin bieber come from", 
        "machine_question": "what country does the person education institution is Stratford Northwestern Secondary School come from", 
        "question": "Is what country is the person attending the Stratford Northwestern Secondary School from?", 
        "sparql": "PREFIX ns: <http://rdf.freebase.com/ns/>\nSELECT DISTINCT ?x\nWHERE {\nFILTER (?x != ?c)\nFILTER (!isLiteral(?x) OR lang(?x) = '' OR langMatches(lang(?x), 'en'))\n?c ns:people.person.education ?k .\n?k ns:education.education.institution ns:m.02w1qmc . \n?c ns:people.person.nationality ?x .\n}\n", 
        "compositionality_type": "composition", 
        "answers": [
            {
                "answer": "Canada", 
                "answer_id": "m.0d060g", 
                "aliases": [
                    "Dominion of Canada", 
                    "Canuckistan"
                ]
            }
        ], 
        "created": "2018-02-13T04:12:29"
    }, 
    {
        "ID": "WebQTrn-3582_c0495334f4678f947149a7a30d8e49a0", 
        "webqsp_ID": "WebQTrn-3582", 
        "webqsp_question": "what countries are around egypt", 
        "machine_question": "what countries are around the country that contains Red Sea Governorate", 
        "question": "Which are the countries that contain the Red Sea Governorate?", 
        "sparql": "PREFIX ns: <http://rdf.freebase.com/ns/>\nSELECT DISTINCT ?x\nWHERE {\nFILTER (?x != ?c)\nFILTER (!isLiteral(?x) OR lang(?x) = '' OR langMatches(lang(?x), 'en'))\n?c ns:location.country.administrative_divisions ns:m.02d5mf . \n?c ns:location.location.adjoin_s ?y .\n?y ns:location.adjoining_relationship.adjoins ?x .\n?x ns:common.topic.notable_types ns:m.01mp .\n}\n", 
        "compositionality_type": "composition", 
        "answers": [
            {
                "answer": "Israel", 
                "answer_id": "m.03spz", 
                "aliases": [
                    "State of Israel"
                ]
            }, 
            {
                "answer": "Libya", 
                "answer_id": "m.04gqr", 
                "aliases": []
            }, 
            {
                "answer": "Sudan", 
                "answer_id": "m.06tw8", 
                "aliases": [
                    "North Sudan", 
                    "Republic of the Sudan", 
                    "Jumh\u016br\u012byat as-S\u016bd\u0101n"
                ]
            }
        ], 
        "created": "2018-02-13T02:13:44"
    }, 
    {
        "ID": "WebQTrn-391_4c7f7fb65898d22c84372372fbcb7e91", 
        "webqsp_ID": "WebQTrn-391", 
        "webqsp_question": "what is the political system in south africa", 
        "machine_question": "what is the political system in the country imports from Zimbabwe", 
        "question": "What form of political system is used in the country that imports from Zimbabwe?", 
        "sparql": "PREFIX ns: <http://rdf.freebase.com/ns/>\nSELECT DISTINCT ?x\nWHERE {\nFILTER (?x != ?c)\nFILTER (!isLiteral(?x) OR lang(?x) = '' OR langMatches(lang(?x), 'en'))\n?c ns:location.statistical_region.places_imported_from ?k .\n?k ns:location.imports_and_exports.imported_from ns:m.088q4 . \n?c ns:location.country.form_of_government ?x .\n}\n", 
        "compositionality_type": "composition", 
        "answers": [
            {
                "answer": "Constitutional republic", 
                "answer_id": "m.0c9rw5", 
                "aliases": [
                    "Constitutional"
                ]
            }, 
            {
                "answer": "Parliamentary republic", 
                "answer_id": "m.0glnsx", 
                "aliases": [
                    "Parliamentary"
                ]
            }
        ], 
        "created": "2018-02-12T20:20:51"
    }, 
    {
        "ID": "WebQTrn-2403_c8cd6b43d8e97069b1c90d0a6d5371ab", 
        "webqsp_ID": "WebQTrn-2403", 
        "webqsp_question": "what is the buddhist holy book", 
        "machine_question": "what is the the religion types of places of worship include Stupa holy book", 
        "question": "What type of religion uses the Stupa holy book?", 
        "sparql": "PREFIX ns: <http://rdf.freebase.com/ns/>\nSELECT DISTINCT ?x\nWHERE {\nFILTER (?x != ?c)\nFILTER (!isLiteral(?x) OR lang(?x) = '' OR langMatches(lang(?x), 'en'))\n?c ns:religion.religion.types_of_places_of_worship ns:m.01q4wd . \n?c ns:religion.religion.texts ?x .\n}\n", 
        "compositionality_type": "composition", 
        "answers": [
            {
                "answer": "P\u0101li Canon", 
                "answer_id": "m.01hnwm", 
                "aliases": [
                    "Tipitaka"
                ]
            }, 
            {
                "answer": "Dhammapada", 
                "answer_id": "m.01nv3q", 
                "aliases": []
            }, 
            {
                "answer": "Mah\u0101y\u0101na s\u016btras", 
                "answer_id": "m.01r1g7", 
                "aliases": []
            }, 
            {
                "answer": "Vimalakirti Sutra", 
                "answer_id": "m.01rky9", 
                "aliases": []
            }, 
            {
                "answer": "Tibetan Buddhist canon", 
                "answer_id": "m.02k1bj", 
                "aliases": []
            }, 
            {
                "answer": "Chinese Buddhist canon", 
                "answer_id": "m.02l3dj", 
                "aliases": []
            }, 
            {
                "answer": "\u015ar\u012bm\u0101l\u0101dev\u012b Si\u1e43han\u0101da S\u016btra", 
                "answer_id": "m.036z9c", 
                "aliases": []
            }, 
            {
                "answer": "Mah\u0101vastu", 
                "answer_id": "m.04_13vt", 
                "aliases": []
            }, 
            {
                "answer": "Amitabha Sutra", 
                "answer_id": "m.04k1b0", 
                "aliases": []
            }, 
            {
                "answer": "\u0100gama", 
                "answer_id": "m.05_m24", 
                "aliases": []
            }, 
            {
                "answer": "Gang\u014dji Garan Engi", 
                "answer_id": "m.05mwk22", 
                "aliases": []
            }, 
            {
                "answer": "U\u1e63\u1e47\u012b\u1e63a Vijaya Dh\u0101ra\u1e47\u012b S\u016btra", 
                "answer_id": "m.0c00_gk", 
                "aliases": [
                    "U\u1e63\u1e47\u012b\u1e63a Vijaya Dh\u0101ra\u1e47\u012b"
                ]
            }, 
            {
                "answer": "Longchen Nyingthig", 
                "answer_id": "m.0c4pcl", 
                "aliases": [
                    "Longchen Nyingtig"
                ]
            }, 
            {
                "answer": "N\u012blaka\u1e47\u1e6dha Dh\u0101ra\u1e47\u012b", 
                "answer_id": "m.0fs6g7", 
                "aliases": [
                    "D\u00e0b\u0113i Zh\u00f2u", 
                    "Mah\u0101 Karu\u1e47\u0101 Dh\u0101ran\u012b", 
                    "Great Compassion Mantra"
                ]
            }
        ], 
        "created": "2018-02-12T23:52:43"
    }, 
    {
        "ID": "WebQTest-1107_730bd530eae1219cfc879e2c564fabb2", 
        "webqsp_ID": "WebQTest-1107", 
        "webqsp_question": "what movies did nick cannon star in", 
        "machine_question": "what movies did nick cannon star in and is the film has a charcter named Jazz Musician", 
        "question": "What movie starring Nick Cannon that has a character Jazz Musician?", 
        "sparql": "PREFIX ns: <http://rdf.freebase.com/ns/>\nSELECT DISTINCT ?x\nWHERE {\nFILTER (?x != ns:m.01d1st)\nFILTER (!isLiteral(?x) OR lang(?x) = '' OR langMatches(lang(?x), 'en'))\nns:m.01d1st ns:film.actor.film ?y .\n?y ns:film.performance.film ?x .\n?x ns:film.film.starring ?c .\n?c ns:film.performance.character ns:m.01141_cq . \n}", 
        "compositionality_type": "conjunction", 
        "answers": [
            {
                "answer": "Love Don't Cost a Thing", 
                "answer_id": "m.09flkf", 
                "aliases": [
                    "Can't Buy Me Love", 
                    "Love Don't Co$t a Thing", 
                    "If You Were My Girl"
                ]
            }
        ], 
        "created": "2018-02-13T04:42:42"
    }, 
    {
        "ID": "WebQTrn-559_68cf056658d49829d8f075fe49eee7e5", 
        "webqsp_ID": "WebQTrn-559", 
        "webqsp_question": "what college did james franco go to", 
        "machine_question": "what college did james franco go to and is the education institution has a sports team named UCLA Bruins gymnastics", 
        "question": "Which college did James Franco attend, where the educational institution has a sports team named UCLA Bruins gymnastics?", 
        "sparql": "PREFIX ns: <http://rdf.freebase.com/ns/>\nSELECT DISTINCT ?x\nWHERE {\nFILTER (?x != ns:m.05bnp0)\nFILTER (!isLiteral(?x) OR lang(?x) = '' OR langMatches(lang(?x), 'en'))\nns:m.05bnp0 ns:people.person.education ?y .\n?y ns:education.education.institution ?x .\n?x ns:common.topic.notable_types ns:m.01y2hnl .\n?x ns:education.educational_institution.sports_teams ns:m.0462vs9 . \n}", 
        "compositionality_type": "conjunction", 
        "answers": [
            {
                "answer": "University of California, Los Angeles", 
                "answer_id": "m.09f2j", 
                "aliases": [
                    "University of California, Los Angeles Campus", 
                    "UCLA"
                ]
            }
        ], 
        "created": "2018-02-12T20:43:31"
    }, 
    {
        "ID": "WebQTrn-3299_f4440609f5cecb091bf8e86adb47be25", 
        "webqsp_ID": "WebQTrn-3299", 
        "webqsp_question": "what type of government did egypt have", 
        "machine_question": "what type of government did the country that has the national anthem Bilady, Bilady, Bilady have", 
        "question": "What type of government does the country that has national anthem Bilady, Bilady, Bilady have?", 
        "sparql": "PREFIX ns: <http://rdf.freebase.com/ns/>\nSELECT DISTINCT ?x\nWHERE {\nFILTER (?x != ?c)\nFILTER (!isLiteral(?x) OR lang(?x) = '' OR langMatches(lang(?x), 'en'))\n?c ns:location.country.national_anthem ?k .\n?k ns:government.national_anthem_of_a_country.anthem ns:m.0d9nj_ . \n?c ns:location.country.form_of_government ?x .\n}\n", 
        "compositionality_type": "composition", 
        "answers": [
            {
                "answer": "Semi-presidential system", 
                "answer_id": "m.01dw03", 
                "aliases": [
                    "Semi-presidential"
                ]
            }, 
            {
                "answer": "Provisional government", 
                "answer_id": "m.02tz3y", 
                "aliases": []
            }
        ], 
        "created": "2018-02-13T01:35:46"
    }, 
    {
        "ID": "WebQTrn-1957_1d1c28cc9c5f4e83f9f932e3615e2391", 
        "webqsp_ID": "WebQTrn-1957", 
        "webqsp_question": "where did the name rome come from", 
        "machine_question": "where did the name the city that hosted 1960 Summer Olympics  come from", 
        "question": "What was the city that hosted the 1960 Summer Olympics named for?", 
        "sparql": "PREFIX ns: <http://rdf.freebase.com/ns/>\nSELECT DISTINCT ?x\nWHERE {\nFILTER (?x != ?c)\nFILTER (!isLiteral(?x) OR lang(?x) = '' OR langMatches(lang(?x), 'en'))\n?c ns:olympics.olympic_host_city.olympics_hosted ns:m.0lbd9 . \n?c ns:symbols.namesake.named_after ?x .\n}\n", 
        "compositionality_type": "composition", 
        "answers": [
            {
                "answer": "Romulus and Remus", 
                "answer_id": "m.0ghqr", 
                "aliases": []
            }
        ], 
        "created": "2018-02-12T23:11:03"
    }, 
    {
        "ID": "WebQTrn-1182_ac67410188d0f2258139a3c84773885e", 
        "webqsp_ID": "WebQTrn-1182", 
        "webqsp_question": "who is the current queen of australia", 
        "machine_question": "who is the current queen of the location time zone is Central Western Time Zone", 
        "question": "Who is the queen covering the location of time zone Central Western Time Zone?", 
        "sparql": "PREFIX ns: <http://rdf.freebase.com/ns/>\nSELECT DISTINCT ?x\nWHERE {\nFILTER (?x != ?c)\nFILTER (!isLiteral(?x) OR lang(?x) = '' OR langMatches(lang(?x), 'en'))\n?c ns:location.location.time_zones ns:m.0y498v7 . \n?c ns:royalty.kingdom.rulers ?x .\n?x ns:common.topic.notable_types ns:m.04fnrhx .\n}\n", 
        "compositionality_type": "composition", 
        "answers": [
            {
                "answer": "Elizabeth II", 
                "answer_id": "m.0d1_f", 
                "aliases": [
                    "Elizabeth Alexandra Mary Windsor", 
                    "Her Majesty the Queen", 
                    "Her Royal Highness The Princess Elizabeth", 
                    "Lillibet", 
                    "Duke of Normandy", 
                    "Her Royal Highness Princess Elizabeth Alexandra Mary of York", 
                    "Queen of Canada", 
                    "Her Royal Highness Princess Elizabeth of York", 
                    "Queen of Australia", 
                    "Princess Eizabeth", 
                    "Queen Elizabeth II", 
                    "\u30a8\u30ea\u30b6\u30d9\u30b9\u30fb\u30a2\u30ec\u30af\u30b5\u30f3\u30c9\u30e9\u30fb\u30e1\u30a2\u30ea\u30fc", 
                    "Queen Elizabeth", 
                    "Princess Elizabeth", 
                    "Elizabeth Alexandra Mary", 
                    "HM The Queen", 
                    "Duke of Lancaster", 
                    "Her Majesty the Queen in Right of Canada", 
                    "HM Queen Elizabeth II", 
                    "H.M. The Queen", 
                    "The Queen", 
                    "Defender of the Faith", 
                    "Elizabeth II, Queen of Great Britain", 
                    "Lord of Mann"
                ]
            }
        ], 
        "created": "2018-02-12T21:51:26"
    }, 
    {
        "ID": "WebQTest-1537_e04e336305e38c30769e4a9c0a1628a4", 
        "webqsp_ID": "WebQTest-1537", 
        "webqsp_question": "what did niels bohr discover about the atomic structure", 
        "machine_question": "what did the person education institution is Gammelholm Grammar School discover about the atomic structure", 
        "question": "What was discovered about the atomic structure by the person who attended Gammelholm Grammar School?", 
        "sparql": "PREFIX ns: <http://rdf.freebase.com/ns/>\nSELECT DISTINCT ?x\nWHERE {\nFILTER (?x != ?c)\nFILTER (!isLiteral(?x) OR lang(?x) = '' OR langMatches(lang(?x), 'en'))\n?c ns:people.person.education ?k .\n?k ns:education.education.institution ns:m.0n51m9d . \n?c ns:base.nobelprizes.nobel_prize_winner.nobel_honor ?y .\n?y ns:base.nobelprizes.nobel_honor.subject_area ?x .\n}\n", 
        "compositionality_type": "composition", 
        "answers": [
            {
                "answer": "Quantum mechanics", 
                "answer_id": "m.069dx", 
                "aliases": [
                    "quantum theory", 
                    "quantum physics"
                ]
            }
        ], 
        "created": "2018-02-13T05:32:14"
    }, 
    {
        "ID": "WebQTest-347_e4b5237eb40e2f15f4aed1d92b88ac39", 
        "webqsp_ID": "WebQTest-347", 
        "webqsp_question": "what did baron de montesquie influence", 
        "machine_question": "what did baron de montesquie influence and is the person notable with the medical condition Leukemia", 
        "question": "Who is the person notable with the medical condition Leukemia that was influence by Baron de Montesquie?", 
        "sparql": "PREFIX ns: <http://rdf.freebase.com/ns/>\nSELECT DISTINCT ?x\nWHERE {\nFILTER (?x != ns:m.0f9wd)\nFILTER (!isLiteral(?x) OR lang(?x) = '' OR langMatches(lang(?x), 'en'))\nns:m.0f9wd ns:influence.influence_node.influenced ?x .\n?x ns:medicine.notable_person_with_medical_condition.condition ns:m.04psf . \n}", 
        "compositionality_type": "conjunction", 
        "answers": [
            {
                "answer": "Clive James", 
                "answer_id": "m.029b4z", 
                "aliases": []
            }
        ], 
        "created": "2018-02-13T03:21:35"
    }, 
    {
        "ID": "WebQTest-772_9f5335bd7208262b4d83a5425bdb84d5", 
        "webqsp_ID": "WebQTest-772", 
        "webqsp_question": "who plays roxanne in ghost rider", 
        "machine_question": "who plays roxanne in the film has a charcter named Blazette", 
        "question": "In the movie that has a character with the name of Blazette who plays Roxanne?", 
        "sparql": "PREFIX ns: <http://rdf.freebase.com/ns/>\nSELECT DISTINCT ?x\nWHERE {\nFILTER (?x != ?c)\nFILTER (!isLiteral(?x) OR lang(?x) = '' OR langMatches(lang(?x), 'en'))\n?c ns:film.film.starring ?k .\n?k ns:film.performance.character ns:m.0pc75c0 . \n?c ns:film.film.starring ?y .\n?y ns:film.performance.actor ?x .\n?y ns:film.performance.character ns:m.02ph41w .\n}\n", 
        "compositionality_type": "composition", 
        "answers": [
            {
                "answer": "Raquel Alessi", 
                "answer_id": "m.026ths5", 
                "aliases": [
                    "Raquel Allessi", 
                    "Raquel Nazzarena Alessi"
                ]
            }, 
            {
                "answer": "Eva Mendes", 
                "answer_id": "m.03_x5t", 
                "aliases": [
                    "Bugs", 
                    "Eva De Reyes Mendes", 
                    "Eva Mendez"
                ]
            }
        ], 
        "created": "2018-02-13T04:07:23"
    }, 
    {
        "ID": "WebQTrn-2641_9f4e223ee039ce1799510374ffe59428", 
        "webqsp_ID": "WebQTrn-2641", 
        "webqsp_question": "where did helen keller die", 
        "machine_question": "where did the person education institution is Wright-Humason School for the Deaf die", 
        "question": "The person who attended education institution is Wright-Humason School for the Deaf died where?", 
        "sparql": "PREFIX ns: <http://rdf.freebase.com/ns/>\nSELECT DISTINCT ?x\nWHERE {\nFILTER (?x != ?c)\nFILTER (!isLiteral(?x) OR lang(?x) = '' OR langMatches(lang(?x), 'en'))\n?c ns:people.person.education ?k .\n?k ns:education.education.institution ns:m.07tr9z . \n?c ns:people.deceased_person.place_of_death ?x .\n}\n", 
        "compositionality_type": "composition", 
        "answers": [
            {
                "answer": "Easton", 
                "answer_id": "m.0rd55", 
                "aliases": [
                    "Easton, Connecticut"
                ]
            }
        ], 
        "created": "2018-02-13T00:22:31"
    }, 
    {
        "ID": "WebQTest-1650_a35bc74c3064369644317f8d105c199b", 
        "webqsp_ID": "WebQTest-1650", 
        "webqsp_question": "what did gloria steinem founded", 
        "machine_question": "what did the person education institution is Waite High School founded", 
        "question": "What things were founded by the person who went to Waite High School?", 
        "sparql": "PREFIX ns: <http://rdf.freebase.com/ns/>\nSELECT DISTINCT ?x\nWHERE {\nFILTER (?x != ?c)\nFILTER (!isLiteral(?x) OR lang(?x) = '' OR langMatches(lang(?x), 'en'))\n?c ns:people.person.education ?k .\n?k ns:education.education.institution ns:m.0gg1zp . \n?c ns:organization.organization_founder.organizations_founded ?x .\n}\n", 
        "compositionality_type": "composition", 
        "answers": [
            {
                "answer": "Coalition of Labor Union Women", 
                "answer_id": "m.027hxmd", 
                "aliases": []
            }, 
            {
                "answer": "Choice USA", 
                "answer_id": "m.02vvc3x", 
                "aliases": []
            }, 
            {
                "answer": "Ms. Foundation for Women", 
                "answer_id": "m.03cytx2", 
                "aliases": []
            }, 
            {
                "answer": "National Women's Political Caucus", 
                "answer_id": "m.04wwjx", 
                "aliases": []
            }, 
            {
                "answer": "New York Media, LLC", 
                "answer_id": "m.05st95c", 
                "aliases": [
                    "New York Media Holdings, LLC", 
                    "New York Media"
                ]
            }, 
            {
                "answer": "Women's Action Alliance", 
                "answer_id": "m.0640068", 
                "aliases": []
            }, 
            {
                "answer": "Feminist Majority Foundation", 
                "answer_id": "m.06d6x5", 
                "aliases": []
            }
        ], 
        "created": "2018-02-13T05:43:17"
    }, 
    {
        "ID": "WebQTrn-1341_33ffee26550b15ffeb1e4e80d9300f29", 
        "webqsp_ID": "WebQTrn-1341", 
        "webqsp_question": "what is the boston celtics current roster", 
        "machine_question": "what is the boston celtics current roster and is the player started his career on 2001", 
        "question": "What player started his career in 2001 and is on the current Boston Celtics roster?", 
        "sparql": "PREFIX ns: <http://rdf.freebase.com/ns/>\nSELECT DISTINCT ?x\nWHERE {\nFILTER (?x != ns:m.0bwjj)\nFILTER (!isLiteral(?x) OR lang(?x) = '' OR langMatches(lang(?x), 'en'))\nns:m.0bwjj ns:sports.sports_team.roster ?y .\n?y ns:sports.sports_team_roster.player ?x .\nFILTER(NOT EXISTS {?y ns:sports.sports_team_roster.from ?sk0} || \nEXISTS {?y ns:sports.sports_team_roster.from ?sk1 . \nFILTER(xsd:datetime(?sk1) <= \"2015-08-10\"^^xsd:dateTime) })\nFILTER(NOT EXISTS {?y ns:sports.sports_team_roster.to ?sk2} || \nEXISTS {?y ns:sports.sports_team_roster.to ?sk3 . \nFILTER(xsd:datetime(?sk3) >= \"2015-08-10\"^^xsd:dateTime) })\n?x ns:sports.pro_athlete.sports_played_professionally ?c .\n?c ns:sports.pro_sports_played.career_start \"2001\"^^xsd:dateTime . \n}", 
        "compositionality_type": "conjunction", 
        "answers": [
            {
                "answer": "Gerald Wallace", 
                "answer_id": "m.03s55y", 
                "aliases": [
                    "Gerald Jermaine Wallace"
                ]
            }
        ], 
        "created": "2018-02-12T22:07:31"
    }, 
    {
        "ID": "WebQTrn-3327_063884db7cbd88485c220abe1f6f4cdd", 
        "webqsp_ID": "WebQTrn-3327", 
        "webqsp_question": "what is the capital city of montana usa", 
        "machine_question": "what is the capital city of the us state that has a capital named Helena usa", 
        "question": "Which city is the capital of the state in the US where the capital is Helena?", 
        "sparql": "PREFIX ns: <http://rdf.freebase.com/ns/>\nSELECT DISTINCT ?x\nWHERE {\nFILTER (?x != ?c)\nFILTER (!isLiteral(?x) OR lang(?x) = '' OR langMatches(lang(?x), 'en'))\n?c ns:location.us_state.capital ns:m.0fvxg . \n?c ns:base.aareas.schema.administrative_area.capital ?x .\n}\n", 
        "compositionality_type": "composition", 
        "answers": [
            {
                "answer": "Helena", 
                "answer_id": "m.0fvxg", 
                "aliases": [
                    "Lewis and Clark County / Helena city", 
                    "Helena, Montana"
                ]
            }
        ], 
        "created": "2018-02-13T01:40:19"
    }, 
    {
        "ID": "WebQTrn-1232_1df3c4ff928707f87381b9327b5e0663", 
        "webqsp_ID": "WebQTrn-1232", 
        "webqsp_question": "where was the roman empire centered", 
        "machine_question": "where was the roman empire centered and is the city that hosted 1960 Summer Olympics", 
        "question": "What city hosted the 1960 Olympics and was the central city of the roman empire?", 
        "sparql": "PREFIX ns: <http://rdf.freebase.com/ns/>\nSELECT DISTINCT ?x\nWHERE {\nFILTER (?x != ns:m.06cmp)\nFILTER (!isLiteral(?x) OR lang(?x) = '' OR langMatches(lang(?x), 'en'))\nns:m.06cmp ns:location.country.capital ?x .\n?x ns:olympics.olympic_host_city.olympics_hosted ns:m.0lbd9 . \n}", 
        "compositionality_type": "conjunction", 
        "answers": [
            {
                "answer": "Rome", 
                "answer_id": "m.06c62", 
                "aliases": [
                    "the City of seven hills", 
                    "Roma", 
                    "Rome, Italy", 
                    "The eternal City", 
                    "\u0420\u0438\u043c", 
                    "Comune of Rome", 
                    "Caput Mundi"
                ]
            }
        ], 
        "created": "2018-02-12T21:56:41"
    }, 
    {
        "ID": "WebQTest-1777_9d64e7810a63ccf5da208a09840437af", 
        "webqsp_ID": "WebQTest-1777", 
        "webqsp_question": "what is rihanna mum called", 
        "machine_question": "what is the artist had a concert tour named Last Girl on Earth mum called", 
        "question": "Who is the mother of the artist who went on Last Girl on Earth tour?", 
        "sparql": "PREFIX ns: <http://rdf.freebase.com/ns/>\nSELECT DISTINCT ?x\nWHERE {\nFILTER (?x != ?c)\nFILTER (!isLiteral(?x) OR lang(?x) = '' OR langMatches(lang(?x), 'en'))\n?c ns:music.artist.concert_tours ns:m.09ghb6b . \n?c ns:people.person.parents ?x .\n?x ns:people.person.gender ns:m.02zsn .\n}\n", 
        "compositionality_type": "composition", 
        "answers": [
            {
                "answer": "Monica Braithwaite", 
                "answer_id": "m.0h30zg_", 
                "aliases": [
                    "Monica Fenty", 
                    "\u30e2\u30cb\u30ab\u30fb\u30d5\u30a7\u30f3\u30c6\u30a3"
                ]
            }
        ], 
        "created": "2018-02-13T05:59:34"
    }, 
    {
        "ID": "WebQTrn-748_77d6d842f0b8e845040933ee56cd8551", 
        "webqsp_ID": "WebQTrn-748", 
        "webqsp_question": "who did john fox coach for", 
        "machine_question": "who did john fox coach for and is the sports team with the fight song Sweet Caroline", 
        "question": "Who did John Fox coach for, and has the sports team with the fight song, Sweet Caroline?", 
        "sparql": "PREFIX ns: <http://rdf.freebase.com/ns/>\nSELECT DISTINCT ?x\nWHERE {\nFILTER (?x != ns:m.06_73l)\nFILTER (!isLiteral(?x) OR lang(?x) = '' OR langMatches(lang(?x), 'en'))\nns:m.06_73l ns:sports.sports_team_coach.teams_coached ?y .\n?y ns:sports.sports_team_coach_tenure.team ?x .\n?x ns:sports.sports_team.fight_song ns:m.0bb6y_8 . \n}", 
        "compositionality_type": "conjunction", 
        "answers": [
            {
                "answer": "Carolina Panthers", 
                "answer_id": "m.01y3c", 
                "aliases": []
            }
        ], 
        "created": "2018-02-12T21:00:10"
    }, 
    {
        "ID": "WebQTrn-2800_d02d8c171d2ccf26bd835bc80e594d4a", 
        "webqsp_ID": "WebQTrn-2800", 
        "webqsp_question": "what movies did matt bomer play in", 
        "machine_question": "what movies did matt bomer play in and is the film has a charcter named Judge", 
        "question": "What film has a character by the name of Judge and features Matt Bomer as an actor?", 
        "sparql": "PREFIX ns: <http://rdf.freebase.com/ns/>\nSELECT DISTINCT ?x\nWHERE {\nFILTER (?x != ns:m.03pmk3)\nFILTER (!isLiteral(?x) OR lang(?x) = '' OR langMatches(lang(?x), 'en'))\nns:m.03pmk3 ns:film.actor.film ?y .\n?y ns:film.performance.film ?x .\n?x ns:film.film.starring ?c .\n?c ns:film.performance.character ns:g.121v7jnx . \n}", 
        "compositionality_type": "conjunction", 
        "answers": [
            {
                "answer": "Winter's Tale", 
                "answer_id": "m.0nffcbb", 
                "aliases": [
                    "New York Winter's Tale"
                ]
            }
        ], 
        "created": "2018-02-13T00:42:15"
    }, 
    {
        "ID": "WebQTrn-3690_ccb021a06cfd9831ce5dc94afd5bdb93", 
        "webqsp_ID": "WebQTrn-3690", 
        "webqsp_question": "which countries share land border with vietnam", 
        "machine_question": "which countries share land border with vietnam and the location time zone is Indochina Time Zone", 
        "question": "What countries bordering Vietnam are in the Indochina Time Zone?", 
        "sparql": "PREFIX ns: <http://rdf.freebase.com/ns/>\nSELECT DISTINCT ?x\nWHERE {\nFILTER (?x != ns:m.01crd5)\nFILTER (!isLiteral(?x) OR lang(?x) = '' OR langMatches(lang(?x), 'en'))\nns:m.01crd5 ns:location.location.adjoin_s ?y .\n?y ns:location.adjoining_relationship.adjoins ?x .\n?x ns:common.topic.notable_types ns:m.01mp .\n?x ns:location.location.time_zones ns:m.043wfc5 . \n}", 
        "compositionality_type": "conjunction", 
        "answers": [
            {
                "answer": "Cambodia", 
                "answer_id": "m.01xbgx", 
                "aliases": []
            }, 
            {
                "answer": "Laos", 
                "answer_id": "m.04hhv", 
                "aliases": [
                    "Lao People's Democratic Republic", 
                    "\ub77c\uc624\uc2a4"
                ]
            }
        ], 
        "created": "2018-02-13T02:24:06"
    }, 
    {
        "ID": "WebQTest-695_46f23675459a1accce2acec1bfe7b72b", 
        "webqsp_ID": "WebQTest-695", 
        "webqsp_question": "what role did paul mccartney play in the beatles", 
        "machine_question": "what role did the person education institution is Joseph Williams Junior School play in the beatles", 
        "question": "WHat role in the beatles band was played the memebr whose school education included Joseph Williams Junior School?", 
        "sparql": "PREFIX ns: <http://rdf.freebase.com/ns/>\nSELECT DISTINCT ?x\nWHERE {\nFILTER (?x != ?c)\nFILTER (!isLiteral(?x) OR lang(?x) = '' OR langMatches(lang(?x), 'en'))\n?c ns:people.person.education ?k .\n?k ns:education.education.institution ns:m.0h35rv8 . \n?c ns:music.group_member.membership ?y .\n?y ns:music.group_membership.role ?x .\n?y ns:music.group_membership.group ns:m.07c0j .\n}\n", 
        "compositionality_type": "composition", 
        "answers": [
            {
                "answer": "Lead Vocals", 
                "answer_id": "m.0_sv_90", 
                "aliases": []
            }, 
            {
                "answer": "Bass", 
                "answer_id": "m.01vj9c", 
                "aliases": []
            }, 
            {
                "answer": "Backing vocalist", 
                "answer_id": "m.03_vpw", 
                "aliases": [
                    "background singer", 
                    "backup singer", 
                    "back-up singer", 
                    "Back-up vocalist", 
                    "backing singer"
                ]
            }
        ], 
        "created": "2018-02-13T04:00:50"
    }, 
    {
        "ID": "WebQTest-1893_50cf52311d0cdd04337ffc0d5378b1b8", 
        "webqsp_ID": "WebQTest-1893", 
        "webqsp_question": "what kind of money does egypt have", 
        "machine_question": "what kind of money does the location partially contains Gebel Elba have", 
        "question": "What type of money is used where Gebel Elba is partially located?", 
        "sparql": "PREFIX ns: <http://rdf.freebase.com/ns/>\nSELECT DISTINCT ?x\nWHERE {\nFILTER (?x != ?c)\nFILTER (!isLiteral(?x) OR lang(?x) = '' OR langMatches(lang(?x), 'en'))\n?c ns:location.location.partiallycontains ?k .\n?k ns:location.partial_containment_relationship.partially_contains ns:m.026cy73 . \n?c ns:location.country.currency_used ?x .\n}\n", 
        "compositionality_type": "composition", 
        "answers": [
            {
                "answer": "Egyptian pound", 
                "answer_id": "m.04phzg", 
                "aliases": []
            }
        ], 
        "created": "2018-02-13T06:16:18"
    }, 
    {
        "ID": "WebQTrn-60_8bb7d66ca88065797304bb757065954e", 
        "webqsp_ID": "WebQTrn-60", 
        "webqsp_question": "what countries do people speak portuguese", 
        "machine_question": "what countries do people speak portuguese and is the tv show The Bride with White Hair was filmed there", 
        "question": "The TV show The Bride with White Hair was filmed in the same country where people speak portuguese. What country is that?", 
        "sparql": "PREFIX ns: <http://rdf.freebase.com/ns/>\nSELECT DISTINCT ?x\nWHERE {\nFILTER (?x != ns:m.05zjd)\nFILTER (!isLiteral(?x) OR lang(?x) = '' OR langMatches(lang(?x), 'en'))\nns:m.05zjd ns:language.human_language.countries_spoken_in ?x .\n?x ns:tv.tv_location.tv_shows_filmed_here ns:m.0jkvl5n . \n}", 
        "compositionality_type": "conjunction", 
        "answers": [
            {
                "answer": "China", 
                "answer_id": "m.0d05w3", 
                "aliases": [
                    "People's Republic of China"
                ]
            }
        ], 
        "created": "2018-02-12T19:43:48"
    }, 
    {
        "ID": "WebQTrn-2711_9be8c18e016b713cbb7f7feb6badebc7", 
        "webqsp_ID": "WebQTrn-2711", 
        "webqsp_question": "what is the main religion in eastern europe", 
        "machine_question": "what is the main religion in eastern europe and the religion text is The Bible", 
        "question": "What main Eastern European religion has a religious text named The Bible?", 
        "sparql": "#MANUAL SPARQL\nPREFIX ns: <http://rdf.freebase.com/ns/>\nSELECT DISTINCT ?x\nWHERE {\n\n    ns:m.09b69 ns:location.location.contains ?y1 .  # Eastern Europe\n    ?y1 ns:common.topic.notable_types ns:m.01mp .   # Country\n    ?y1 ns:location.statistical_region.religions ?y2 . \n    ?y2 ns:location.religion_percentage.religion ?x .?x ns:religion.religion.texts ns:m.015j7 . \n}", 
        "compositionality_type": "conjunction", 
        "answers": [
            {
                "answer": "Protestantism", 
                "answer_id": "m.05sfs", 
                "aliases": [
                    "Protestant"
                ]
            }, 
            {
                "answer": "Catholicism", 
                "answer_id": "m.0c8wxp", 
                "aliases": [
                    "Roman Catholic convert", 
                    "Roman Catholic"
                ]
            }
        ], 
        "created": "2018-02-13T00:29:44"
    }, 
    {
        "ID": "WebQTrn-135_bda5cd2328322c309ecbaaffcb9e7c8e", 
        "webqsp_ID": "WebQTrn-135", 
        "webqsp_question": "what is the dominant language in israel", 
        "machine_question": "what is the dominant language in the country that contains Haifa District", 
        "question": "what is the dominant language in the country that contains Haifa District?", 
        "sparql": "PREFIX ns: <http://rdf.freebase.com/ns/>\nSELECT DISTINCT ?x\nWHERE {\nFILTER (?x != ?c)\nFILTER (!isLiteral(?x) OR lang(?x) = '' OR langMatches(lang(?x), 'en'))\n?c ns:location.country.administrative_divisions ns:m.03gclm . \n?c ns:location.country.official_language ?x .\n}\n", 
        "compositionality_type": "composition", 
        "answers": [
            {
                "answer": "Hebrew Language", 
                "answer_id": "m.03hkp", 
                "aliases": [
                    "Ivrit", 
                    "\u05e2\u05b4\u05d1\u05b0\u05e8\u05b4\u05d9\u05ea,", 
                    "Modern Hebrew", 
                    "\u05e2\u05d1\u05e8\u05d9\u05ea", 
                    "Hebrew"
                ]
            }, 
            {
                "answer": "Arabic Language", 
                "answer_id": "m.0jzc", 
                "aliases": [
                    "Arabic", 
                    "/m/0jzc", 
                    "\u0639\u0631\u0628\u064a", 
                    "\u0627\u0644\u0644\u063a\u0629 \u0627\u0644\u0639\u0631\u0628\u064a\u0629"
                ]
            }
        ], 
        "created": "2018-02-12T19:50:48"
    }, 
    {
        "ID": "WebQTrn-2103_020f93c678f201a55199a0c40d829467", 
        "webqsp_ID": "WebQTrn-2103", 
        "webqsp_question": "what to see and do in san diego california", 
        "machine_question": "what to see and do in san diego california and the location time zone is Pacific Time Zone", 
        "question": "What are things to do and see in San Diego, California?", 
        "sparql": "PREFIX ns: <http://rdf.freebase.com/ns/>\nSELECT DISTINCT ?x\nWHERE {\nFILTER (?x != ns:m.071vr)\nFILTER (!isLiteral(?x) OR lang(?x) = '' OR langMatches(lang(?x), 'en'))\nns:m.071vr ns:travel.travel_destination.tourist_attractions ?x .\n?x ns:location.location.time_zones ns:m.02lcqs . \n}", 
        "compositionality_type": "conjunction", 
        "answers": [
            {
                "answer": "Aquatica San Diego", 
                "answer_id": "m.01094zpg", 
                "aliases": [
                    "Aquatica, SeaWorld's Waterpark San Diego"
                ]
            }, 
            {
                "answer": "Balboa Park", 
                "answer_id": "m.033zn0", 
                "aliases": [
                    "Balboa", 
                    "Balboa Park, San Diego, California"
                ]
            }, 
            {
                "answer": "Old Town San Diego State Historic Park", 
                "answer_id": "m.04c6gj", 
                "aliases": [
                    "Old Town San Diego Historic District", 
                    "Pueblo de San Diego", 
                    "Old Town San Diego State Historic"
                ]
            }, 
            {
                "answer": "Belmont Park", 
                "answer_id": "m.09f7hq", 
                "aliases": [
                    "Belmont"
                ]
            }, 
            {
                "answer": "SeaWorld San Diego", 
                "answer_id": "m.0c8cjw", 
                "aliases": []
            }
        ], 
        "created": "2018-02-12T23:23:29"
    }, 
    {
        "ID": "WebQTest-859_c071c552853eb739a0ff0c67bb9ed366", 
        "webqsp_ID": "WebQTest-859", 
        "webqsp_question": "what are the predominant religions in russia", 
        "machine_question": "what are the predominant religions in the location that appointed Dmitry Medvedev to govermental position", 
        "question": "The location that appointed Dmitry Medvedev to govermental position has what predominant religions?", 
        "sparql": "PREFIX ns: <http://rdf.freebase.com/ns/>\nSELECT DISTINCT ?x\nWHERE {\nFILTER (?x != ?c)\nFILTER (!isLiteral(?x) OR lang(?x) = '' OR langMatches(lang(?x), 'en'))\n?c ns:government.governmental_jurisdiction.governing_officials ?k .\n?k ns:government.government_position_held.appointed_by ns:m.08wdkk . \n?c ns:location.statistical_region.religions ?y .\n?y ns:location.religion_percentage.religion ?x .\n}\n", 
        "compositionality_type": "composition", 
        "answers": [
            {
                "answer": "Russian Orthodox Church", 
                "answer_id": "m.0b06q", 
                "aliases": [
                    "Russian Orthodox"
                ]
            }, 
            {
                "answer": "Islam", 
                "answer_id": "m.0flw86", 
                "aliases": []
            }
        ], 
        "created": "2018-02-13T04:18:14"
    }, 
    {
        "ID": "WebQTest-1155_7280a830b2275c6024614d5ba2adae18", 
        "webqsp_ID": "WebQTest-1155", 
        "webqsp_question": "what are the seven nations of central america", 
        "machine_question": "what are the seven nations of central america and is the location that appointed Otto P\u00c3\u00a9rez Molina to govermental position", 
        "question": "What nation in South America appointed Otto P\u00c3\u00a9rez Molina to a governmental position?", 
        "sparql": "PREFIX ns: <http://rdf.freebase.com/ns/>\nSELECT DISTINCT ?x\nWHERE {\nFILTER (?x != ns:m.01tzh)\nFILTER (!isLiteral(?x) OR lang(?x) = '' OR langMatches(lang(?x), 'en'))\nns:m.01tzh ns:location.location.contains ?x .\n?x ns:common.topic.notable_types ns:m.01mp .\n?x ns:government.governmental_jurisdiction.governing_officials ?c .\n?c ns:government.government_position_held.appointed_by ns:m.02z7rt8 . \n}", 
        "compositionality_type": "conjunction", 
        "answers": [
            {
                "answer": "Guatemala", 
                "answer_id": "m.0345_", 
                "aliases": [
                    "Guatemala."
                ]
            }
        ], 
        "created": "2018-02-13T04:48:52"
    }, 
    {
        "ID": "WebQTrn-1531_d2aef4ecb09bef9772b1862c9853f3a9", 
        "webqsp_ID": "WebQTrn-1531", 
        "webqsp_question": "what year did the houston rockets win their first championship", 
        "machine_question": "what year did the the team won the 1994 NBA Finals championship win their first championship", 
        "question": "In which year did the athletic organization that claimed victory in the 1994 NBA Finals win its first championship?", 
        "sparql": "PREFIX ns: <http://rdf.freebase.com/ns/>\nSELECT DISTINCT ?x\nWHERE {\nFILTER (?x != ?c)\nFILTER (!isLiteral(?x) OR lang(?x) = '' OR langMatches(lang(?x), 'en'))\n?c ns:sports.sports_team.championships ns:m.08x9cq . \n?c ns:sports.sports_team.championships ?x .\n?x ns:time.event.start_date ?sk0 .\n}\nORDER BY xsd:datetime(?sk0)\nLIMIT 1\n", 
        "compositionality_type": "composition", 
        "answers": [
            {
                "answer": "1994 NBA Finals", 
                "answer_id": "m.08x9cq", 
                "aliases": []
            }
        ], 
        "created": "2018-02-12T22:28:29"
    }, 
    {
        "ID": "WebQTest-1442_0eb6c16318e7ea0bb70afa8df5ba8497", 
        "webqsp_ID": "WebQTest-1442", 
        "webqsp_question": "what currency shall i take to croatia", 
        "machine_question": "what currency shall i take to the country that has the national anthem Lijepa na\u00c5\u00a1a domovino", 
        "question": "The country with the national anthem Lijepa Nasa Domonivo uses what type of currency?", 
        "sparql": "PREFIX ns: <http://rdf.freebase.com/ns/>\nSELECT DISTINCT ?x\nWHERE {\nFILTER (?x != ?c)\nFILTER (!isLiteral(?x) OR lang(?x) = '' OR langMatches(lang(?x), 'en'))\n?c ns:location.country.national_anthem ?k .\n?k ns:government.national_anthem_of_a_country.anthem ns:m.01lbch . \n?c ns:location.country.currency_used ?x .\n}\n", 
        "compositionality_type": "composition", 
        "answers": [
            {
                "answer": "Croatian kuna", 
                "answer_id": "m.02z8jt", 
                "aliases": []
            }
        ], 
        "created": "2018-02-13T05:21:31"
    }, 
    {
        "ID": "WebQTrn-15_eaac1aaebf57dc435695a38211732467", 
        "webqsp_ID": "WebQTrn-15", 
        "webqsp_question": "what is nina dobrev nationality", 
        "machine_question": "what is nina dobrev nationality and is the mechandise trade percent of gdp was 100.1", 
        "question": "What country had a mechandise trade percent gdp or 100.1 and is Nina Dobrev's nationality?", 
        "sparql": "PREFIX ns: <http://rdf.freebase.com/ns/>\nSELECT DISTINCT ?x\nWHERE {\nFILTER (?x != ns:m.027nwk2)\nFILTER (!isLiteral(?x) OR lang(?x) = '' OR langMatches(lang(?x), 'en'))\nns:m.027nwk2 ns:people.person.nationality ?x .\n?x ns:location.statistical_region.merchandise_trade_percent_of_gdp ?c .\n?c ns:measurement_unit.dated_percentage.rate \"100.1\" . \n}", 
        "compositionality_type": "conjunction", 
        "answers": [
            {
                "answer": "Bulgaria", 
                "answer_id": "m.015qh", 
                "aliases": [
                    "Republic of Bulgaria"
                ]
            }
        ], 
        "created": "2018-02-12T19:39:38"
    }, 
    {
        "ID": "WebQTrn-2485_c4a4d1b444e9f0b28e960a3c1f7717ac", 
        "webqsp_ID": "WebQTrn-2485", 
        "webqsp_question": "what countries does china border", 
        "machine_question": "what countries does the location that appointed National People's Congress to govermental position border", 
        "question": "What countries are bordered by the country that has National People's Congress as a governmental position?", 
        "sparql": "PREFIX ns: <http://rdf.freebase.com/ns/>\nSELECT DISTINCT ?x\nWHERE {\nFILTER (?x != ?c)\nFILTER (!isLiteral(?x) OR lang(?x) = '' OR langMatches(lang(?x), 'en'))\n?c ns:government.governmental_jurisdiction.governing_officials ?k .\n?k ns:government.government_position_held.appointed_by ns:m.0c3xm . \n?c ns:location.location.adjoin_s ?y .\n?y ns:location.adjoining_relationship.adjoins ?x .\n?x ns:common.topic.notable_types ns:m.01mp .\n}\n", 
        "compositionality_type": "composition", 
        "answers": [
            {
                "answer": "Nepal", 
                "answer_id": "m.016zwt", 
                "aliases": [
                    "Democratic Republic of Nepal", 
                    "Federal Democratic Republic of Nepal"
                ]
            }, 
            {
                "answer": "Vietnam", 
                "answer_id": "m.01crd5", 
                "aliases": [
                    "Republic of Vietnam", 
                    "Viet nam", 
                    "Socialist Republic of Vietnam", 
                    "Annam"
                ]
            }, 
            {
                "answer": "Japan", 
                "answer_id": "m.03_3d", 
                "aliases": [
                    "Nippon-koku", 
                    "JPN", 
                    "\u042f\u043f\u043e\u043d\u0438\u044f", 
                    "JAP", 
                    "Nihon", 
                    "Dai-Nippon", 
                    "Nippon", 
                    "NTSC J", 
                    "Japan", 
                    "State of Japan", 
                    "Land of the Rising Sun", 
                    "Nihon-koku"
                ]
            }, 
            {
                "answer": "India", 
                "answer_id": "m.03rk0", 
                "aliases": [
                    "Bharat Ganrajya", 
                    "Hindustan", 
                    "Bharat", 
                    "Republic of India", 
                    "The Republic of India"
                ]
            }, 
            {
                "answer": "Kazakhstan", 
                "answer_id": "m.047lj", 
                "aliases": []
            }, 
            {
                "answer": "Laos", 
                "answer_id": "m.04hhv", 
                "aliases": [
                    "Lao People's Democratic Republic", 
                    "\ub77c\uc624\uc2a4"
                ]
            }, 
            {
                "answer": "Mongolia", 
                "answer_id": "m.04w8f", 
                "aliases": []
            }, 
            {
                "answer": "Myanmar", 
                "answer_id": "m.04xn_", 
                "aliases": [
                    "Burma", 
                    "\u30df\u30e3\u30f3\u30de\u30fc\u9023\u90a6\u5171\u548c\u56fd", 
                    "Myanmar (Burma)", 
                    "Republic of the Union of Myanmar"
                ]
            }, 
            {
                "answer": "North Korea", 
                "answer_id": "m.05b7q", 
                "aliases": [
                    "Democratic People's Republic of Korea", 
                    "DPRK"
                ]
            }, 
            {
                "answer": "Pakistan", 
                "answer_id": "m.05sb1", 
                "aliases": [
                    "Federation of Pakistan", 
                    "Islamic Republic of Pakistan"
                ]
            }, 
            {
                "answer": "Russia", 
                "answer_id": "m.06bnz", 
                "aliases": [
                    "Russian Federation", 
                    "\u0420\u043e\u0441\u0441\u0438\u044f"
                ]
            }, 
            {
                "answer": "Taiwan", 
                "answer_id": "m.06f32", 
                "aliases": [
                    "ROC", 
                    "Chinese Taipei", 
                    "Taiwan, Republic of China"
                ]
            }, 
            {
                "answer": "Bhutan", 
                "answer_id": "m.07bxhl", 
                "aliases": []
            }, 
            {
                "answer": "Tajikistan", 
                "answer_id": "m.07dvs", 
                "aliases": []
            }, 
            {
                "answer": "Afghanistan", 
                "answer_id": "m.0jdd", 
                "aliases": [
                    "Afganistan", 
                    "Islamic Republic of Afghanistan"
                ]
            }, 
            {
                "answer": "Kyrgyzstan", 
                "answer_id": "m.0jt3tjf", 
                "aliases": [
                    "Kirgisistan"
                ]
            }
        ], 
        "created": "2018-02-13T00:02:05"
    }, 
    {
        "ID": "WebQTrn-1166_36334ff676e6ea58a121fd5e903a5b64", 
        "webqsp_ID": "WebQTrn-1166", 
        "webqsp_question": "what type of political system does iran have", 
        "machine_question": "what type of political system does the country that has the national anthem National Anthem of the Islamic Republic of Iran have", 
        "question": "The country with the National Anthem of the Islamic Republic of Iran has what type of political system?", 
        "sparql": "PREFIX ns: <http://rdf.freebase.com/ns/>\nSELECT DISTINCT ?x\nWHERE {\nFILTER (?x != ?c)\nFILTER (!isLiteral(?x) OR lang(?x) = '' OR langMatches(lang(?x), 'en'))\n?c ns:location.country.national_anthem ?k .\n?k ns:government.national_anthem_of_a_country.anthem ns:m.02lwm6 . \n?c ns:location.country.form_of_government ?x .\n}\n", 
        "compositionality_type": "composition", 
        "answers": [
            {
                "answer": "Parliamentary system", 
                "answer_id": "m.018wl5", 
                "aliases": [
                    "Parliamentary", 
                    "Parliamentary Democracy"
                ]
            }, 
            {
                "answer": "Presidential system", 
                "answer_id": "m.01d9r3", 
                "aliases": [
                    "Presidential"
                ]
            }, 
            {
                "answer": "Islamic republic", 
                "answer_id": "m.01fgl7", 
                "aliases": [
                    "Islamic"
                ]
            }, 
            {
                "answer": "Unitary state", 
                "answer_id": "m.01fpfn", 
                "aliases": [
                    "Unitary republic", 
                    "Unitary"
                ]
            }, 
            {
                "answer": "Theocracy", 
                "answer_id": "m.07lg6", 
                "aliases": []
            }
        ], 
        "created": "2018-02-12T21:49:58"
    }, 
    {
        "ID": "WebQTrn-3050_f2c5cd42efa7cac78d3b6ba563b9d557", 
        "webqsp_ID": "WebQTrn-3050", 
        "webqsp_question": "what government type is north korea", 
        "machine_question": "what government type is the country that contains Kaesong", 
        "question": "What type of government does the county that contains Kaesong have?", 
        "sparql": "PREFIX ns: <http://rdf.freebase.com/ns/>\nSELECT DISTINCT ?x\nWHERE {\nFILTER (?x != ?c)\nFILTER (!isLiteral(?x) OR lang(?x) = '' OR langMatches(lang(?x), 'en'))\n?c ns:location.country.administrative_divisions ns:m.022gb9 . \n?c ns:location.country.form_of_government ?x .\n}\n", 
        "compositionality_type": "composition", 
        "answers": [
            {
                "answer": "Juche", 
                "answer_id": "m.01gt0n", 
                "aliases": []
            }, 
            {
                "answer": "Socialist state", 
                "answer_id": "m.025tbxf", 
                "aliases": [
                    "Socialist", 
                    "Socialist Republic"
                ]
            }, 
            {
                "answer": "Single-party state", 
                "answer_id": "m.0py4y", 
                "aliases": [
                    "Single-party"
                ]
            }
        ], 
        "created": "2018-02-13T01:08:51"
    }, 
    {
        "ID": "WebQTrn-3582_5bc74979fc1292d14458ccc3a131a6e6", 
        "webqsp_ID": "WebQTrn-3582", 
        "webqsp_question": "what countries are around egypt", 
        "machine_question": "what countries are around egypt and the country capital is Khartoum", 
        "question": "Of the countries that are around Egypt, which country has the capital of Khartoum?", 
        "sparql": "PREFIX ns: <http://rdf.freebase.com/ns/>\nSELECT DISTINCT ?x\nWHERE {\nFILTER (?x != ns:m.02k54)\nFILTER (!isLiteral(?x) OR lang(?x) = '' OR langMatches(lang(?x), 'en'))\nns:m.02k54 ns:location.location.adjoin_s ?y .\n?y ns:location.adjoining_relationship.adjoins ?x .\n?x ns:common.topic.notable_types ns:m.01mp .\n?x ns:location.country.capital ns:m.04d_m . \n}", 
        "compositionality_type": "conjunction", 
        "answers": [
            {
                "answer": "Sudan", 
                "answer_id": "m.06tw8", 
                "aliases": [
                    "North Sudan", 
                    "Republic of the Sudan", 
                    "Jumh\u016br\u012byat as-S\u016bd\u0101n"
                ]
            }
        ], 
        "created": "2018-02-13T02:13:44"
    }, 
    {
        "ID": "WebQTest-1191_453ce37eca09cc00d776ef1a90872823", 
        "webqsp_ID": "WebQTest-1191", 
        "webqsp_question": "what language do people speak in the bahamas", 
        "machine_question": "what language do people speak in the the country capital is Nassau", 
        "question": "What is the language spoken in the country whose capital is Nassau?", 
        "sparql": "PREFIX ns: <http://rdf.freebase.com/ns/>\nSELECT DISTINCT ?x\nWHERE {\nFILTER (?x != ?c)\nFILTER (!isLiteral(?x) OR lang(?x) = '' OR langMatches(lang(?x), 'en'))\n?c ns:location.country.capital ns:m.05hcy . \n?c ns:location.country.languages_spoken ?x .\n}\n", 
        "compositionality_type": "composition", 
        "answers": [
            {
                "answer": "Bahamas Creole English Language", 
                "answer_id": "m.026qjbs", 
                "aliases": [
                    "Bahamian Dialect", 
                    "Bahamas Creole English", 
                    "Bahamian Creole English"
                ]
            }, 
            {
                "answer": "English Language", 
                "answer_id": "m.02h40lc", 
                "aliases": [
                    "Sekgoa", 
                    "Anglit", 
                    "English language", 
                    "English"
                ]
            }
        ], 
        "created": "2018-02-13T04:52:48"
    }, 
    {
        "ID": "WebQTrn-3082_33e218389f51ddc009fd64547c2037a1", 
        "webqsp_ID": "WebQTrn-3082", 
        "webqsp_question": "what all countries are in south america", 
        "machine_question": "what all countries are in south america and the religious leader is Pope Francis", 
        "question": "What South American country has a Pope Francis as religious leader?", 
        "sparql": "PREFIX ns: <http://rdf.freebase.com/ns/>\nSELECT DISTINCT ?x\nWHERE {\nFILTER (?x != ns:m.06n3y)\nFILTER (!isLiteral(?x) OR lang(?x) = '' OR langMatches(lang(?x), 'en'))\nns:m.06n3y ns:location.location.contains ?x .\n?x ns:common.topic.notable_types ns:m.01mp .\n?x ns:religion.religious_leadership_jurisdiction.leader ?c .\n?c ns:religion.religious_organization_leadership.leader ns:m.05ngt2 . \n}", 
        "compositionality_type": "conjunction", 
        "answers": [
            {
                "answer": "Argentina", 
                "answer_id": "m.0jgd", 
                "aliases": [
                    "The Argentine", 
                    "Agrentina ", 
                    "Argentine Republic"
                ]
            }, 
            {
                "answer": "Argentina", 
                "answer_id": "m.0jgd", 
                "aliases": [
                    "The Argentine", 
                    "Agrentina ", 
                    "Argentine Republic"
                ]
            }
        ], 
        "created": "2018-02-13T01:12:18"
    }, 
    {
        "ID": "WebQTrn-1336_e185ea716e0dcbdf8d9ad6498b5e88f1", 
        "webqsp_ID": "WebQTrn-1336", 
        "webqsp_question": "who is the leader of cuba 2012", 
        "machine_question": "who is the leader of the currency used in the country is Cuban convertible peso 2012", 
        "question": "Who was the leader of the country that uses Cuban convertible peso in 2012?", 
        "sparql": "PREFIX ns: <http://rdf.freebase.com/ns/>\nSELECT DISTINCT ?x\nWHERE {\nFILTER (?x != ?c)\nFILTER (!isLiteral(?x) OR lang(?x) = '' OR langMatches(lang(?x), 'en'))\n?c ns:location.country.currency_used ns:m.049p6c . \n?c ns:government.governmental_jurisdiction.governing_officials ?y .\n?y ns:government.government_position_held.office_holder ?x .\n?y ns:government.government_position_held.basic_title ns:m.060c4 .\nFILTER(NOT EXISTS {?y ns:government.government_position_held.from ?sk0} || \nEXISTS {?y ns:government.government_position_held.from ?sk1 . \nFILTER(xsd:datetime(?sk1) <= \"2012-12-31\"^^xsd:dateTime) })\nFILTER(NOT EXISTS {?y ns:government.government_position_held.to ?sk2} || \nEXISTS {?y ns:government.government_position_held.to ?sk3 . \nFILTER(xsd:datetime(?sk3) >= \"2012-01-01\"^^xsd:dateTime) })\n}\n", 
        "compositionality_type": "composition", 
        "answers": [
            {
                "answer": "Ra\u00fal Castro", 
                "answer_id": "m.01gcjq", 
                "aliases": [
                    "Ra\u00fal Modesto Castro Ruz", 
                    "Raul Castro"
                ]
            }
        ], 
        "created": "2018-02-12T22:07:12"
    }, 
    {
        "ID": "WebQTest-473_020f93c678f201a55199a0c40d829467", 
        "webqsp_ID": "WebQTest-473", 
        "webqsp_question": "where does robin williams live 2011", 
        "machine_question": "where does robin williams live 2011 and the location time zone is Pacific Time Zone", 
        "question": "Which city placed in the Pacific Time Zone did Robin Williams live in in 2011?", 
        "sparql": "PREFIX ns: <http://rdf.freebase.com/ns/>\nSELECT DISTINCT ?x\nWHERE {\nFILTER (?x != ns:m.0dzf_)\nFILTER (!isLiteral(?x) OR lang(?x) = '' OR langMatches(lang(?x), 'en'))\nns:m.0dzf_ ns:people.person.places_lived ?y .\n?y ns:people.place_lived.location ?x .\nFILTER(NOT EXISTS {?y ns:people.place_lived.end_date ?sk0} || \nEXISTS {?y ns:people.place_lived.end_date ?sk1 . \nFILTER(xsd:datetime(?sk1) >= \"2011-01-01\"^^xsd:dateTime) })\nFILTER(NOT EXISTS {?y ns:people.place_lived.start_date ?sk2} || \nEXISTS {?y ns:people.place_lived.start_date ?sk3 . \nFILTER(xsd:datetime(?sk3) <= \"2011-12-31\"^^xsd:dateTime) })\n?x ns:location.location.time_zones ns:m.02lcqs . \n}", 
        "compositionality_type": "conjunction", 
        "answers": [
            {
                "answer": "San Francisco", 
                "answer_id": "m.0d6lp", 
                "aliases": [
                    "San Francisco, Calif.", 
                    "Esseff", 
                    "San Fran, Frisco, The City, City by the Bay", 
                    "Baghdad by the Bay", 
                    "SanFran", 
                    "San Francisco, CA", 
                    "City by the Bay - San Francisco", 
                    "San Francisco County, California", 
                    "San Francisco, California", 
                    "Frisco", 
                    "The City", 
                    "SF", 
                    "The City by the Bay"
                ]
            }
        ], 
        "created": "2018-02-13T03:33:51"
    }, 
    {
        "ID": "WebQTrn-225_756432571a0496bbbb64e5b731d588fd", 
        "webqsp_ID": "WebQTrn-225", 
        "webqsp_question": "what country is located in the balkan peninsula", 
        "machine_question": "what country is located in the balkan peninsula and the currency used in the country is Macedonian denar", 
        "question": "What European country in the Balkan peninsula uses the Macedonian Denar as domestic trading currency?", 
        "sparql": "PREFIX ns: <http://rdf.freebase.com/ns/>\nSELECT DISTINCT ?x\nWHERE {\nFILTER (?x != ns:m.01jjk)\nFILTER (!isLiteral(?x) OR lang(?x) = '' OR langMatches(lang(?x), 'en'))\nns:m.01jjk ns:location.location.contains ?x .\n?x ns:base.biblioness.bibs_location.loc_type ?sk0 .\nFILTER (str(?sk0) = \"Country\")\n?x ns:location.country.currency_used ns:m.022dkb . \n}", 
        "compositionality_type": "conjunction", 
        "answers": [
            {
                "answer": "Republic of Macedonia", 
                "answer_id": "m.0bjv6", 
                "aliases": [
                    "Macedonia (FYROM)", 
                    "\u0420\u0435\u043f\u0443\u0431\u043b\u0438\u043a\u0430 \u041c\u0430\u043a\u0435\u0434\u043e\u043d\u0438\u0458\u0430", 
                    "Republika Makedonija", 
                    "Macedonia", 
                    "Makedonija"
                ]
            }
        ], 
        "created": "2018-02-12T20:01:37"
    }, 
    {
        "ID": "WebQTrn-1175_f040897089279d1e1f44cfbf309d9895", 
        "webqsp_ID": "WebQTrn-1175", 
        "webqsp_question": "where is el salvador located", 
        "machine_question": "the country that has the national anthem National Anthem of El Salvador located", 
        "question": "Where is the country that has national anthem of El Salvador?", 
        "sparql": "PREFIX ns: <http://rdf.freebase.com/ns/>\nSELECT DISTINCT ?x\nWHERE {\nFILTER (?x != ?c)\nFILTER (!isLiteral(?x) OR lang(?x) = '' OR langMatches(lang(?x), 'en'))\n?c ns:location.country.national_anthem ?k .\n?k ns:government.national_anthem_of_a_country.anthem ns:m.01n85n . \n?c ns:location.location.containedby ?x .\n}\n", 
        "compositionality_type": "composition", 
        "answers": [
            {
                "answer": "Central America", 
                "answer_id": "m.01tzh", 
                "aliases": []
            }, 
            {
                "answer": "Latin America", 
                "answer_id": "m.04pnx", 
                "aliases": []
            }, 
            {
                "answer": "North America", 
                "answer_id": "m.059g4", 
                "aliases": []
            }, 
            {
                "answer": "Americas", 
                "answer_id": "m.07c5l", 
                "aliases": [
                    "New World", 
                    "The Americas", 
                    "America"
                ]
            }
        ], 
        "created": "2018-02-12T21:50:31"
    }, 
    {
        "ID": "WebQTrn-2185_edf6a52008463727e837bd3577442966", 
        "webqsp_ID": "WebQTrn-2185", 
        "webqsp_question": "what years did the atlanta braves win the world series", 
        "machine_question": "what years did the the team has a team moscot named Homer win the world series", 
        "question": "Homer the mascot's team won the World Series in which years?", 
        "sparql": "PREFIX ns: <http://rdf.freebase.com/ns/>\nSELECT DISTINCT ?x\nWHERE {\nFILTER (?x != ?c)\nFILTER (!isLiteral(?x) OR lang(?x) = '' OR langMatches(lang(?x), 'en'))\n?c ns:sports.sports_team.team_mascot ns:m.07vbb7 . \n?c ns:sports.sports_team.championships ?x .\n}\n", 
        "compositionality_type": "composition", 
        "answers": [
            {
                "answer": "1995 World Series", 
                "answer_id": "m.04j712", 
                "aliases": [
                    "1995 World"
                ]
            }
        ], 
        "created": "2018-02-12T23:32:28"
    }, 
    {
        "ID": "WebQTrn-922_498797c759f6119ac48af1f70b11e2c1", 
        "webqsp_ID": "WebQTrn-922", 
        "webqsp_question": "what did whitney houston die off", 
        "machine_question": "what did the artist had a concert tour named I'm Your Baby Tonight World Tour die off", 
        "question": "What caused the death of the artist who had the \"I'm Your Baby Tonight World Tour\"?", 
        "sparql": "PREFIX ns: <http://rdf.freebase.com/ns/>\nSELECT DISTINCT ?x\nWHERE {\nFILTER (?x != ?c)\nFILTER (!isLiteral(?x) OR lang(?x) = '' OR langMatches(lang(?x), 'en'))\n?c ns:music.artist.concert_tours ns:m.047bc2r . \n?c ns:people.deceased_person.cause_of_death ?x .\n}\n", 
        "compositionality_type": "composition", 
        "answers": [
            {
                "answer": "Drowning", 
                "answer_id": "m.01g27f", 
                "aliases": [
                    "drowned"
                ]
            }, 
            {
                "answer": "Coronary artery disease", 
                "answer_id": "m.01s1m", 
                "aliases": [
                    "Atherosclerotic heart disease", 
                    "Coronary disease", 
                    "Coronary Artery disorder", 
                    "Coronary heart disorder"
                ]
            }, 
            {
                "answer": "Cocaine overdose", 
                "answer_id": "m.02nx6jb", 
                "aliases": []
            }
        ], 
        "created": "2018-02-12T21:20:42"
    }, 
    {
        "ID": "WebQTrn-3409_c0d237bd131a29f88728e7f7fac4418f", 
        "webqsp_ID": "WebQTrn-3409", 
        "webqsp_question": "what is south america made up of", 
        "machine_question": "what is south america made up of and the religious organization leadeship is Eastern Catholic Churches", 
        "question": "What country is a part of South America and has Eastern Catholica Churches as their primary religious organization?", 
        "sparql": "PREFIX ns: <http://rdf.freebase.com/ns/>\nSELECT DISTINCT ?x\nWHERE {\nFILTER (?x != ns:m.06n3y)\nFILTER (!isLiteral(?x) OR lang(?x) = '' OR langMatches(lang(?x), 'en'))\nns:m.06n3y ns:location.location.contains ?x .\n?x ns:common.topic.notable_types ns:m.01mp .\n?x ns:religion.religious_leadership_jurisdiction.leader ?c .\n?c ns:religion.religious_organization_leadership.organization ns:m.01fgks . \n}", 
        "compositionality_type": "conjunction", 
        "answers": [
            {
                "answer": "Argentina", 
                "answer_id": "m.0jgd", 
                "aliases": [
                    "The Argentine", 
                    "Agrentina ", 
                    "Argentine Republic"
                ]
            }
        ], 
        "created": "2018-02-13T01:53:22"
    }, 
    {
        "ID": "WebQTrn-3308_e1be00e136960a39b9ba6d4a9d47ced7", 
        "webqsp_ID": "WebQTrn-3308", 
        "webqsp_question": "what countries do new zealand export to", 
        "machine_question": "what countries do new zealand export to and the country capital is Funafuti", 
        "question": "Which country that New Zealand exports to is Funafuti the capital of?", 
        "sparql": "PREFIX ns: <http://rdf.freebase.com/ns/>\nSELECT DISTINCT ?x\nWHERE {\nFILTER (?x != ns:m.0ctw_b)\nFILTER (!isLiteral(?x) OR lang(?x) = '' OR langMatches(lang(?x), 'en'))\nns:m.0ctw_b ns:location.statistical_region.places_exported_to ?y .\n?y ns:location.imports_and_exports.exported_to ?x .\n?x ns:location.country.capital ns:m.0d7f3 . \n}", 
        "compositionality_type": "conjunction", 
        "answers": [
            {
                "answer": "Tuvalu", 
                "answer_id": "m.07fsv", 
                "aliases": [
                    "Islands of Tuvalu", 
                    "Ellice Islands"
                ]
            }
        ], 
        "created": "2018-02-13T01:37:24"
    }, 
    {
        "ID": "WebQTrn-3134_bedad6538f5c6114bfe9f92e6c0dfaf0", 
        "webqsp_ID": "WebQTrn-3134", 
        "webqsp_question": "what continent is mexico located on", 
        "machine_question": "what continent is the country that has the national anthem Himno Nacional Mexicano located on", 
        "question": "Which continent is the nation that has Himno Nacional Mexicano as its national anthem located in?", 
        "sparql": "PREFIX ns: <http://rdf.freebase.com/ns/>\nSELECT DISTINCT ?x\nWHERE {\nFILTER (?x != ?c)\nFILTER (!isLiteral(?x) OR lang(?x) = '' OR langMatches(lang(?x), 'en'))\n?c ns:location.country.national_anthem ?k .\n?k ns:government.national_anthem_of_a_country.anthem ns:m.012144 . \n?c ns:base.locations.countries.continent ?x .\n}\n", 
        "compositionality_type": "composition", 
        "answers": [
            {
                "answer": "North America", 
                "answer_id": "m.059g4", 
                "aliases": []
            }
        ], 
        "created": "2018-02-13T01:17:27"
    }, 
    {
        "ID": "WebQTrn-1112_d4f167187dff4ae9cc84124971e18f1a", 
        "webqsp_ID": "WebQTrn-1112", 
        "webqsp_question": "what are five countries that border france", 
        "machine_question": "what are five countries that border france and is the location contains and airport that server Kleve (district)", 
        "question": "Which of the five countries that has a border with France has an airport that serves the district of Kleve?", 
        "sparql": "PREFIX ns: <http://rdf.freebase.com/ns/>\nSELECT DISTINCT ?x\nWHERE {\nFILTER (?x != ns:m.0f8l9c)\nFILTER (!isLiteral(?x) OR lang(?x) = '' OR langMatches(lang(?x), 'en'))\nns:m.0f8l9c ns:location.location.adjoin_s ?y .\n?y ns:location.adjoining_relationship.adjoins ?x .\n?x ns:common.topic.notable_types ns:m.01mp .\n?x ns:location.location.contains ?c .\n?c ns:aviation.airport.serves ns:m.01b98m . \n}", 
        "compositionality_type": "conjunction", 
        "answers": [
            {
                "answer": "Germany", 
                "answer_id": "m.0345h", 
                "aliases": [
                    "Federal Republic of Germany", 
                    "Bundesrepublik Deutschland", 
                    "BRD", 
                    "Deutschland"
                ]
            }
        ], 
        "created": "2018-02-12T21:45:31"
    }, 
    {
        "ID": "WebQTest-153_9e751fa5737a8c052ac036c3f090b11c", 
        "webqsp_ID": "WebQTest-153", 
        "webqsp_question": "what are the sights to see in madrid", 
        "machine_question": "what are the sights to see in madrid and is the structure construction started in before 1734", 
        "question": "What site that had its construction begin before 1734 is a sight to see in Madrid?", 
        "sparql": "PREFIX ns: <http://rdf.freebase.com/ns/>\nSELECT DISTINCT ?x\nWHERE {\nFILTER (?x != ns:m.056_y)\nFILTER (!isLiteral(?x) OR lang(?x) = '' OR langMatches(lang(?x), 'en'))\nns:m.056_y ns:travel.travel_destination.tourist_attractions ?x .\n?x ns:architecture.structure.construction_started ?num .\nFILTER (?num < \"1734\"^^xsd:dateTime) . \n}", 
        "compositionality_type": "comparative", 
        "answers": [
            {
                "answer": "El Escorial", 
                "answer_id": "m.01bc9m", 
                "aliases": [
                    "Royal Seat of San Lorenzo de El Escorial"
                ]
            }
        ], 
        "created": "2018-02-13T02:50:35"
    }, 
    {
        "ID": "WebQTest-1565_c2110136e8053bd3e0c314139d48b9ac", 
        "webqsp_ID": "WebQTest-1565", 
        "webqsp_question": "where does houston dynamo play", 
        "machine_question": "where does the team won the MLS Cup 2007 championship play", 
        "question": "What city is the 2007 MLS Cup championship team from?", 
        "sparql": "PREFIX ns: <http://rdf.freebase.com/ns/>\nSELECT DISTINCT ?x\nWHERE {\nFILTER (?x != ?c)\nFILTER (!isLiteral(?x) OR lang(?x) = '' OR langMatches(lang(?x), 'en'))\n?c ns:sports.sports_team.championships ns:m.026jq0q . \n?c ns:sports.sports_team.location ?x .\n}\n", 
        "compositionality_type": "composition", 
        "answers": [
            {
                "answer": "Houston", 
                "answer_id": "m.03l2n", 
                "aliases": [
                    "Houston, Texas", 
                    "Houston, TX", 
                    "Montgomery County / Houston city"
                ]
            }
        ], 
        "created": "2018-02-13T05:34:53"
    }, 
    {
        "ID": "WebQTrn-3239_139cc3d497bad703a6253a51b39f0edc", 
        "webqsp_ID": "WebQTrn-3239", 
        "webqsp_question": "who coached the dallas cowboys in 1996", 
        "machine_question": "who coached the the team won the Super Bowl VI championship in 1996", 
        "question": "Who coached the champion of the 1996 Super Bowl VI?", 
        "sparql": "PREFIX ns: <http://rdf.freebase.com/ns/>\nSELECT DISTINCT ?x\nWHERE {\nFILTER (?x != ?c)\nFILTER (!isLiteral(?x) OR lang(?x) = '' OR langMatches(lang(?x), 'en'))\n?c ns:sports.sports_team.championships ns:m.076n1 . \n?c ns:american_football.football_team.historical_coaching_staff ?y .\n?y ns:american_football.football_historical_coach_position.coach ?x .\nFILTER(NOT EXISTS {?y ns:american_football.football_historical_coach_position.from ?sk0} || \nEXISTS {?y ns:american_football.football_historical_coach_position.from ?sk1 . \nFILTER(xsd:datetime(?sk1) <= \"1996-12-31\"^^xsd:dateTime) })\nFILTER(NOT EXISTS {?y ns:american_football.football_historical_coach_position.to ?sk2} || \nEXISTS {?y ns:american_football.football_historical_coach_position.to ?sk3 . \nFILTER(xsd:datetime(?sk3) >= \"1996-01-01\"^^xsd:dateTime) })\n}\n", 
        "compositionality_type": "composition", 
        "answers": [
            {
                "answer": "Barry Switzer", 
                "answer_id": "m.016b90", 
                "aliases": [
                    "The King"
                ]
            }
        ], 
        "created": "2018-02-13T01:30:16"
    }, 
    {
        "ID": "WebQTrn-1493_48414fac64ceef2f167ad6de42efe07d", 
        "webqsp_ID": "WebQTrn-1493", 
        "webqsp_question": "where is tahiti bora bora", 
        "machine_question": "where is tahiti bora bora and is the co2 emiisions per capita was once 2010 metric ton", 
        "question": "What location has a co2 emission per capita of 2010 metric ton and includes Tahiti Bora Bora?", 
        "sparql": "PREFIX ns: <http://rdf.freebase.com/ns/>\nSELECT DISTINCT ?x\nWHERE {\nFILTER (?x != ns:m.0hb6g)\nFILTER (!isLiteral(?x) OR lang(?x) = '' OR langMatches(lang(?x), 'en'))\nns:m.0hb6g ns:location.location.containedby ?x .\n?x ns:location.statistical_region.co2_emissions_per_capita ?c .\n?c ns:measurement_unit.dated_metric_ton.date \"2010\"^^xsd:dateTime . \n}", 
        "compositionality_type": "conjunction", 
        "answers": [
            {
                "answer": "French Polynesia", 
                "answer_id": "m.02wzv", 
                "aliases": [
                    "Territoire De La Polynesie Francaise", 
                    "French Settlements In Oceania", 
                    "French Establishments In Oceania", 
                    "Territoire De La Polyn\u00e9sie Fran\u00e7aise", 
                    "Etablissements Francais De L' Oceanie", 
                    "Etablissementsfrancaisdeloceanie", 
                    "French Oceania", 
                    "\u00c9tablissements Fran\u00e7ais De L\u2019 Oc\u00e9anie", 
                    "Polyn\u00e9sie Fran\u00e7aise"
                ]
            }
        ], 
        "created": "2018-02-12T22:26:06"
    }, 
    {
        "ID": "WebQTest-620_42588c6fd3d30a777953bbaf2b4079b9", 
        "webqsp_ID": "WebQTest-620", 
        "webqsp_question": "where did kennedy 's inaugural address take place", 
        "machine_question": "where did the person education institution is Edward Devotion School 's inaugural address take place", 
        "question": "What was the site of the inaugural address of the notable person who attended the place of learning known as Edward Devotion School?", 
        "sparql": "#MANUAL SPARQL\nPREFIX ns: <http://rdf.freebase.com/ns/>\nSELECT DISTINCT ?x\nWHERE {\n\tns:m.05br2y1 ns:time.event.locations ?x .\n}", 
        "compositionality_type": "composition", 
        "answers": [
            {
                "answer": "United States Capitol", 
                "answer_id": "m.07vth", 
                "aliases": []
            }, 
            {
                "answer": "Washington, D.C.", 
                "answer_id": "m.0rh6k", 
                "aliases": [
                    "Washington D.C.", 
                    "Washington", 
                    "The District", 
                    "U.S. Capital", 
                    "District of Columbia / Washington city", 
                    "The District of Columbia", 
                    "District of Columbia", 
                    "Washington DC"
                ]
            }
        ], 
        "created": "2018-02-13T03:50:38"
    }, 
    {
        "ID": "WebQTest-1324_f4a104d8c52908ab206863b13fb60154", 
        "webqsp_ID": "WebQTest-1324", 
        "webqsp_question": "what college did john nash go to", 
        "machine_question": "what college did john nash go to and is the education institution has a sports team named Princeton Tigers football", 
        "question": "What college did John Nash attend that has the sports team Princeton Tigers football?", 
        "sparql": "PREFIX ns: <http://rdf.freebase.com/ns/>\nSELECT DISTINCT ?x\nWHERE {\nFILTER (?x != ns:m.0pyqh)\nFILTER (!isLiteral(?x) OR lang(?x) = '' OR langMatches(lang(?x), 'en'))\nns:m.0pyqh ns:people.person.education ?y .\n?y ns:education.education.institution ?x .\n?x ns:common.topic.notable_types ns:m.01y2hnl .\n?x ns:education.educational_institution.sports_teams ns:m.09rvt17 . \n}", 
        "compositionality_type": "conjunction", 
        "answers": [
            {
                "answer": "Princeton University", 
                "answer_id": "m.05zl0", 
                "aliases": [
                    "Princeton University, Borough of Princeton", 
                    "Princeton University, main campus", 
                    "Princeton"
                ]
            }
        ], 
        "created": "2018-02-13T05:05:58"
    }, 
    {
        "ID": "WebQTest-869_4f8be37f2fabdf84a7e8da82f511bdbd", 
        "webqsp_ID": "WebQTest-869", 
        "webqsp_question": "where is ancient phoenician", 
        "machine_question": "where is ancient the country capital is Byblos", 
        "question": "Where in ancient time was the capital Byblos?", 
        "sparql": "PREFIX ns: <http://rdf.freebase.com/ns/>\nSELECT DISTINCT ?x\nWHERE {\nFILTER (?x != ?c)\nFILTER (!isLiteral(?x) OR lang(?x) = '' OR langMatches(lang(?x), 'en'))\n?c ns:location.country.capital ns:m.017ygw . \n?c ns:location.location.containedby ?x .\n}\n", 
        "compositionality_type": "composition", 
        "answers": [
            {
                "answer": "Lebanon", 
                "answer_id": "m.04hqz", 
                "aliases": []
            }
        ], 
        "created": "2018-02-13T04:19:27"
    }, 
    {
        "ID": "WebQTrn-2569_d2aef4ecb09bef9772b1862c9853f3a9", 
        "webqsp_ID": "WebQTrn-2569", 
        "webqsp_question": "where do the houston rockets play basketball", 
        "machine_question": "where do the the team won the 1994 NBA Finals championship play basketball", 
        "question": "Where does the team that won the 1994 NBA Finals championship play basketball?", 
        "sparql": "PREFIX ns: <http://rdf.freebase.com/ns/>\nSELECT DISTINCT ?x\nWHERE {\nFILTER (?x != ?c)\nFILTER (!isLiteral(?x) OR lang(?x) = '' OR langMatches(lang(?x), 'en'))\n?c ns:sports.sports_team.championships ns:m.08x9cq . \n?c ns:sports.sports_team.arena_stadium ?x .\n}\n", 
        "compositionality_type": "composition", 
        "answers": [
            {
                "answer": "Toyota Center", 
                "answer_id": "m.01tx3t", 
                "aliases": [
                    "Toyota", 
                    "Toyota Center, Houston"
                ]
            }, 
            {
                "answer": "Lakewood Church Central Campus", 
                "answer_id": "m.01txlf", 
                "aliases": [
                    "The Summit", 
                    "Lakewood Church Central Campus, Houston", 
                    "Compaq Center"
                ]
            }
        ], 
        "created": "2018-02-13T00:11:06"
    }, 
    {
        "ID": "WebQTrn-3252_517c2c9a60d4450a134b37883844d398", 
        "webqsp_ID": "WebQTrn-3252", 
        "webqsp_question": "what countries does the niger river flow through", 
        "machine_question": "what countries does the niger river flow through and the currency used in the country is West African CFA franc", 
        "question": "What countries does the Niger River flow through that uses the West African CFA franc as its currency?", 
        "sparql": "PREFIX ns: <http://rdf.freebase.com/ns/>\nSELECT DISTINCT ?x\nWHERE {\nFILTER (?x != ns:m.05csx)\nFILTER (!isLiteral(?x) OR lang(?x) = '' OR langMatches(lang(?x), 'en'))\nns:m.05csx ns:geography.river.basin_countries ?x .\n?x ns:location.country.currency_used ns:m.025sw2q . \n}", 
        "compositionality_type": "conjunction", 
        "answers": [
            {
                "answer": "Benin", 
                "answer_id": "m.0164v", 
                "aliases": []
            }, 
            {
                "answer": "Mali", 
                "answer_id": "m.04v09", 
                "aliases": []
            }, 
            {
                "answer": "Niger", 
                "answer_id": "m.05cc1", 
                "aliases": [
                    "Republic of Niger"
                ]
            }
        ], 
        "created": "2018-02-13T01:31:53"
    }, 
    {
        "ID": "WebQTrn-649_de658673cee1023fc6ef44e3b9f9e275", 
        "webqsp_ID": "WebQTrn-649", 
        "webqsp_question": "what is the capital city of albania", 
        "machine_question": "what is the capital city of the country imports from Greece", 
        "question": "What is the capital city of the country that imported from Greece?", 
        "sparql": "PREFIX ns: <http://rdf.freebase.com/ns/>\nSELECT DISTINCT ?x\nWHERE {\nFILTER (?x != ?c)\nFILTER (!isLiteral(?x) OR lang(?x) = '' OR langMatches(lang(?x), 'en'))\n?c ns:location.statistical_region.places_imported_from ?k .\n?k ns:location.imports_and_exports.imported_from ns:m.035qy . \n?c ns:location.country.capital ?x .\n}\n", 
        "compositionality_type": "composition", 
        "answers": [
            {
                "answer": "Tirana", 
                "answer_id": "m.07m_f", 
                "aliases": [
                    "Tirana, Albania"
                ]
            }
        ], 
        "created": "2018-02-12T20:51:43"
    }, 
    {
        "ID": "WebQTest-672_324c29b52401502cc9935840afb1c7fa", 
        "webqsp_ID": "WebQTest-672", 
        "webqsp_question": "what form of government does north korea have", 
        "machine_question": "what form of government does the currency used in the country is North Korean won have", 
        "question": "The country of North Korea has what form of government?", 
        "sparql": "PREFIX ns: <http://rdf.freebase.com/ns/>\nSELECT DISTINCT ?x\nWHERE {\nFILTER (?x != ?c)\nFILTER (!isLiteral(?x) OR lang(?x) = '' OR langMatches(lang(?x), 'en'))\n?c ns:location.country.currency_used ns:m.01rn14 . \n?c ns:location.country.form_of_government ?x .\n}\n", 
        "compositionality_type": "composition", 
        "answers": [
            {
                "answer": "Juche", 
                "answer_id": "m.01gt0n", 
                "aliases": []
            }, 
            {
                "answer": "Socialist state", 
                "answer_id": "m.025tbxf", 
                "aliases": [
                    "Socialist", 
                    "Socialist Republic"
                ]
            }, 
            {
                "answer": "Single-party state", 
                "answer_id": "m.0py4y", 
                "aliases": [
                    "Single-party"
                ]
            }
        ], 
        "created": "2018-02-13T03:58:48"
    }, 
    {
        "ID": "WebQTrn-3380_f21a9d4b1e98d5b7e3c57e4b34448cfb", 
        "webqsp_ID": "WebQTrn-3380", 
        "webqsp_question": "what currency do the ukraine use", 
        "machine_question": "what currency do the the country that has the national anthem Shche ne vmerla Ukraina use", 
        "question": "What is the type of currency where the national anthem is Shche ne vmeria Ukraina?", 
        "sparql": "PREFIX ns: <http://rdf.freebase.com/ns/>\nSELECT DISTINCT ?x\nWHERE {\nFILTER (?x != ?c)\nFILTER (!isLiteral(?x) OR lang(?x) = '' OR langMatches(lang(?x), 'en'))\n?c ns:location.country.national_anthem ?k .\n?k ns:government.national_anthem_of_a_country.anthem ns:m.01kvjf . \n?c ns:location.country.currency_used ?x .\n}\n", 
        "compositionality_type": "composition", 
        "answers": [
            {
                "answer": "Ukrainian hryvnia", 
                "answer_id": "m.035qkb", 
                "aliases": [
                    "Ukrainian Hrivna"
                ]
            }
        ], 
        "created": "2018-02-13T01:47:54"
    }, 
    {
        "ID": "WebQTrn-981_906ad6be7bec9d208f4dde4f7721c261", 
        "webqsp_ID": "WebQTrn-981", 
        "webqsp_question": "what does latin america consist of", 
        "machine_question": "what does latin america consist of and is the co2 emiisions per capita was once 2009 metric ton", 
        "question": "Which Latin American countries had CO2 emissions per capita was once of 2009 metric ton?", 
        "sparql": "PREFIX ns: <http://rdf.freebase.com/ns/>\nSELECT DISTINCT ?x\nWHERE {\nFILTER (?x != ns:m.04pnx)\nFILTER (!isLiteral(?x) OR lang(?x) = '' OR langMatches(lang(?x), 'en'))\nns:m.04pnx ns:location.location.contains ?x .\n?x ns:common.topic.notable_types ns:m.01mp .\n?x ns:location.statistical_region.co2_emissions_per_capita ?c .\n?c ns:measurement_unit.dated_metric_ton.date \"2009\"^^xsd:dateTime . \n}", 
        "compositionality_type": "conjunction", 
        "answers": [
            {
                "answer": "Belize", 
                "answer_id": "m.0164b", 
                "aliases": []
            }, 
            {
                "answer": "Bolivia", 
                "answer_id": "m.0165v", 
                "aliases": [
                    "The Plurinational State of Bolivia"
                ]
            }, 
            {
                "answer": "Peru", 
                "answer_id": "m.016wzw", 
                "aliases": []
            }, 
            {
                "answer": "Chile", 
                "answer_id": "m.01p1v", 
                "aliases": [
                    "Republic of Chile"
                ]
            }, 
            {
                "answer": "Costa Rica", 
                "answer_id": "m.01p8s", 
                "aliases": [
                    "Republic of Costa Rica"
                ]
            }, 
            {
                "answer": "Dominican Republic", 
                "answer_id": "m.027rn", 
                "aliases": [
                    "Rep\u00fablica Dominicana"
                ]
            }, 
            {
                "answer": "El Salvador", 
                "answer_id": "m.02k8k", 
                "aliases": []
            }, 
            {
                "answer": "Guatemala", 
                "answer_id": "m.0345_", 
                "aliases": [
                    "Guatemala."
                ]
            }, 
            {
                "answer": "Haiti", 
                "answer_id": "m.03gyl", 
                "aliases": [
                    "Republic of Haiti", 
                    "Ha\u00efti"
                ]
            }, 
            {
                "answer": "Honduras", 
                "answer_id": "m.03h2c", 
                "aliases": [
                    "Republic of Honduras", 
                    "Rep\u00fablica de Honduras", 
                    "Spanish Honduras"
                ]
            }, 
            {
                "answer": "Nicaragua", 
                "answer_id": "m.05c74", 
                "aliases": [
                    "Rep\u00fablica de Nicaragua", 
                    "Republic of Nicaragua"
                ]
            }, 
            {
                "answer": "Panama", 
                "answer_id": "m.05qx1", 
                "aliases": [
                    "Republic of Panama"
                ]
            }, 
            {
                "answer": "Paraguay", 
                "answer_id": "m.05v10", 
                "aliases": [
                    "Corazon de America", 
                    "Heart of America", 
                    "Republic of Paraguay", 
                    "Coraz\u00f3n de Am\u00e9rica"
                ]
            }, 
            {
                "answer": "Uruguay", 
                "answer_id": "m.07twz", 
                "aliases": [
                    "Eastern Republic of the Uruguay", 
                    "Republic East of the Uruguay", 
                    "Eastern Republic of Uruguay", 
                    "Oriental Republic of Uruguay"
                ]
            }, 
            {
                "answer": "Venezuela", 
                "answer_id": "m.07ylj", 
                "aliases": [
                    "Bolivarian Republic of Venezuela"
                ]
            }, 
            {
                "answer": "Mexico", 
                "answer_id": "m.0b90_r", 
                "aliases": [
                    "M\u00e9jico", 
                    "M\u00e9xico", 
                    "Estados Unidos Mexicanos", 
                    "United Mexican States"
                ]
            }, 
            {
                "answer": "Cuba", 
                "answer_id": "m.0d04z6", 
                "aliases": [
                    "Republic of Cuba"
                ]
            }, 
            {
                "answer": "Argentina", 
                "answer_id": "m.0jgd", 
                "aliases": [
                    "The Argentine", 
                    "Agrentina ", 
                    "Argentine Republic"
                ]
            }
        ], 
        "created": "2018-02-12T21:29:09"
    }, 
    {
        "ID": "WebQTrn-655_033d7e5496f4c34018e7dc190e7de9a0", 
        "webqsp_ID": "WebQTrn-655", 
        "webqsp_question": "who owns nissan car manufacturer", 
        "machine_question": "who owns the organization that has the leadership role of Chief Planning Officer car manufacturer", 
        "question": "Who have leadership role of Chief Planning Officer car manufacturer?", 
        "sparql": "PREFIX ns: <http://rdf.freebase.com/ns/>\nSELECT DISTINCT ?x\nWHERE {\nFILTER (?x != ?c)\nFILTER (!isLiteral(?x) OR lang(?x) = '' OR langMatches(lang(?x), 'en'))\n?c ns:organization.organization.leadership ?k .\n?k ns:organization.leadership.role ns:m.0zry5r4 . \n?c ns:organization.organization.founders ?x .\n}\n", 
        "compositionality_type": "composition", 
        "answers": [
            {
                "answer": "Yoshisuke Aikawa", 
                "answer_id": "m.04nzf7", 
                "aliases": []
            }, 
            {
                "answer": "William Gorham", 
                "answer_id": "m.0vpy5vb", 
                "aliases": []
            }, 
            {
                "answer": "Masujiro Hashimoto", 
                "answer_id": "m.0wrj2c_", 
                "aliases": []
            }, 
            {
                "answer": "Kenjiro Den", 
                "answer_id": "m.0wrj2lb", 
                "aliases": []
            }, 
            {
                "answer": "Rokuro Aoyama", 
                "answer_id": "m.0wrj2mj", 
                "aliases": []
            }, 
            {
                "answer": "Meitaro Takeuchi", 
                "answer_id": "m.0wrj2n7", 
                "aliases": [
                    "Aketaro Takeuchi"
                ]
            }
        ], 
        "created": "2018-02-12T20:51:49"
    }, 
    {
        "ID": "WebQTrn-3763_a725d13be16116bdc37bf5dd852e35b1", 
        "webqsp_ID": "WebQTrn-3763", 
        "webqsp_question": "what country is russia close to", 
        "machine_question": "what country is russia close to and the location time zone is Eastern European Time Zone", 
        "question": "What countries border Russia in the Eastern European Time Zone?", 
        "sparql": "PREFIX ns: <http://rdf.freebase.com/ns/>\nSELECT DISTINCT ?x\nWHERE {\nFILTER (?x != ns:m.06bnz)\nFILTER (!isLiteral(?x) OR lang(?x) = '' OR langMatches(lang(?x), 'en'))\nns:m.06bnz ns:location.location.adjoin_s ?y .\n?y ns:location.adjoining_relationship.adjoins ?x .\n?x ns:common.topic.notable_types ns:m.01mp .\n?x ns:location.location.time_zones ns:m.03plfd . \n}", 
        "compositionality_type": "conjunction", 
        "answers": [
            {
                "answer": "Estonia", 
                "answer_id": "m.02kmm", 
                "aliases": [
                    "Estland", 
                    "Republic of Estonia"
                ]
            }, 
            {
                "answer": "Finland", 
                "answer_id": "m.02vzc", 
                "aliases": [
                    "Suomi", 
                    "Republic of Finland"
                ]
            }, 
            {
                "answer": "Latvia", 
                "answer_id": "m.04g5k", 
                "aliases": [
                    "Lettland", 
                    "Republic of Latvia"
                ]
            }, 
            {
                "answer": "Lithuania", 
                "answer_id": "m.04gzd", 
                "aliases": [
                    "Republic of Lithuania", 
                    "Lietuva", 
                    "Lietuvos Respublika", 
                    "Litauen"
                ]
            }, 
            {
                "answer": "Ukraine", 
                "answer_id": "m.07t21", 
                "aliases": [
                    "Ukraine Region"
                ]
            }
        ], 
        "created": "2018-02-13T02:34:32"
    }, 
    {
        "ID": "WebQTrn-1479_8ce2ab621bdf99bd94ad0cc84085f8d2", 
        "webqsp_ID": "WebQTrn-1479", 
        "webqsp_question": "what are bridgit mendler 's parents names", 
        "machine_question": "what are the artist had a concert tour named Bridgit Mendler: Live in Concert 's parents names", 
        "question": "What are the parents' names of the artist who had the concert tour named Bridgit Mendler: Live in Concert?", 
        "sparql": "PREFIX ns: <http://rdf.freebase.com/ns/>\nSELECT DISTINCT ?x\nWHERE {\nFILTER (?x != ?c)\nFILTER (!isLiteral(?x) OR lang(?x) = '' OR langMatches(lang(?x), 'en'))\n?c ns:music.artist.concert_tours ns:m.0pmgy16 . \n?c ns:people.person.parents ?x .\n}\n", 
        "compositionality_type": "composition", 
        "answers": [
            {
                "answer": "Harry Mendler", 
                "answer_id": "m.0qf8bfs", 
                "aliases": []
            }, 
            {
                "answer": "Leah Mendler", 
                "answer_id": "m.0qf8bm3", 
                "aliases": [
                    "Leah"
                ]
            }
        ], 
        "created": "2018-02-12T22:23:48"
    }, 
    {
        "ID": "WebQTrn-1312_ecf74b22fdffc9655aa5128a68cb4dbd", 
        "webqsp_ID": "WebQTrn-1312", 
        "webqsp_question": "who is the new governor of florida 2011", 
        "machine_question": "who is the new governor of the location that appointed Jeb Bush to govermental position 2011", 
        "question": "What is the current governor of the State that appointed Jeb Bush as the governor during the year 2011?", 
        "sparql": "PREFIX ns: <http://rdf.freebase.com/ns/>\nSELECT DISTINCT ?x\nWHERE {\nFILTER (?x != ?c)\nFILTER (!isLiteral(?x) OR lang(?x) = '' OR langMatches(lang(?x), 'en'))\n?c ns:government.governmental_jurisdiction.governing_officials ?k .\n?k ns:government.government_position_held.appointed_by ns:m.019x9z . \n?c ns:government.governmental_jurisdiction.governing_officials ?y .\n?y ns:government.government_position_held.office_holder ?x .\n?y ns:government.government_position_held.basic_title ns:m.0fkvn .\nFILTER(NOT EXISTS {?y ns:government.government_position_held.from ?sk0} || \nEXISTS {?y ns:government.government_position_held.from ?sk1 . \nFILTER(xsd:datetime(?sk1) <= \"2011-12-31\"^^xsd:dateTime) })\nFILTER(NOT EXISTS {?y ns:government.government_position_held.to ?sk2} || \nEXISTS {?y ns:government.government_position_held.to ?sk3 . \nFILTER(xsd:datetime(?sk3) >= \"2011-01-01\"^^xsd:dateTime) })\nFILTER(NOT EXISTS {?y ns:government.government_position_held.from ?sk4} || \nEXISTS {?y ns:government.government_position_held.from ?sk5 . \nFILTER(xsd:datetime(?sk5) <= \"2011-12-31\"^^xsd:dateTime) })\nFILTER(NOT EXISTS {?y ns:government.government_position_held.to ?sk6} || \nEXISTS {?y ns:government.government_position_held.to ?sk7 . \nFILTER(xsd:datetime(?sk7) >= \"2011-01-01\"^^xsd:dateTime) })\n?y ns:government.government_position_held.from ?sk8 .\n}\nORDER BY DESC(xsd:datetime(?sk8))\nLIMIT 1\n", 
        "compositionality_type": "composition", 
        "answers": [
            {
                "answer": "Rick Scott", 
                "answer_id": "m.0btx2g", 
                "aliases": [
                    "Richard L Scott", 
                    "Richard Lynn Scott"
                ]
            }
        ], 
        "created": "2018-02-12T22:04:54"
    }, 
    {
        "ID": "WebQTest-1311_fcc34328571e9404d2f765eba0688369", 
        "webqsp_ID": "WebQTest-1311", 
        "webqsp_question": "what was antoni gaudi inspired by", 
        "machine_question": "what was the person education institution is Escola T\u00c3\u00a8cnica Superior d'Arquitectura de Barcelona inspired by", 
        "question": "What famous people were inspiratinal sources to the famous alumni of Escola T\u00c3\u00a8cnica Superior d'Arquitectura de Barcelona?", 
        "sparql": "PREFIX ns: <http://rdf.freebase.com/ns/>\nSELECT DISTINCT ?x\nWHERE {\nFILTER (?x != ?c)\nFILTER (!isLiteral(?x) OR lang(?x) = '' OR langMatches(lang(?x), 'en'))\n?c ns:people.person.education ?k .\n?k ns:education.education.institution ns:g.121j1xk8 . \n?c ns:influence.influence_node.influenced_by ?x .\n}\n", 
        "compositionality_type": "composition", 
        "answers": [
            {
                "answer": "Eug\u00e8ne Viollet-le-Duc", 
                "answer_id": "m.02mpv", 
                "aliases": [
                    "Eugene-Emmanuel Viollet-Le-Duc", 
                    "Eug\u00e8ne Emmanuel Viollet-le-Duc", 
                    "Euge\u0300ne-Emmanuel Viollet-le-Duc", 
                    "Eugene Viollet-le-Duc"
                ]
            }, 
            {
                "answer": "William Morris", 
                "answer_id": "m.08304", 
                "aliases": [
                    "W. Morris"
                ]
            }
        ], 
        "created": "2018-02-13T05:04:32"
    }, 
    {
        "ID": "WebQTest-837_5dd0eeca79ae03b7711252c032849eb2", 
        "webqsp_ID": "WebQTest-837", 
        "webqsp_question": "what year did the baltimore ravens win superbowl", 
        "machine_question": "what year did the the team has a team moscot named Rise win superbowl", 
        "question": "Which year did the team whose mascots's name is Rise win the Superbowl?", 
        "sparql": "PREFIX ns: <http://rdf.freebase.com/ns/>\nSELECT DISTINCT ?x\nWHERE {\nFILTER (?x != ?c)\nFILTER (!isLiteral(?x) OR lang(?x) = '' OR langMatches(lang(?x), 'en'))\n?c ns:sports.sports_team.team_mascot ns:m.0nz45zc . \n?c ns:sports.sports_team.championships ?x .\n?x ns:sports.sports_championship_event.championship ns:m.06x5s .\n}\n", 
        "compositionality_type": "composition", 
        "answers": [
            {
                "answer": "Super Bowl XLVII", 
                "answer_id": "m.0642vqv", 
                "aliases": [
                    "Super Bowl 2013", 
                    "Super Bowl 47"
                ]
            }, 
            {
                "answer": "Super Bowl XXXV", 
                "answer_id": "m.076yq", 
                "aliases": []
            }
        ], 
        "created": "2018-02-13T04:13:39"
    }, 
    {
        "ID": "WebQTrn-3478_94ffac9463c2e44c2a2c75b0e328f394", 
        "webqsp_ID": "WebQTrn-3478", 
        "webqsp_question": "what languages do scottish people speak", 
        "machine_question": "what languages do the country that has the national anthem Scotland the Brave people speak", 
        "question": "Which languages are spoken in the country, that has the national anthem, Scotland the Brave?", 
        "sparql": "PREFIX ns: <http://rdf.freebase.com/ns/>\nSELECT DISTINCT ?x\nWHERE {\nFILTER (?x != ?c)\nFILTER (!isLiteral(?x) OR lang(?x) = '' OR langMatches(lang(?x), 'en'))\n?c ns:location.country.national_anthem ?k .\n?k ns:government.national_anthem_of_a_country.anthem ns:m.019mh7 . \n?c ns:location.country.languages_spoken ?x .\n}\n", 
        "compositionality_type": "composition", 
        "answers": [
            {
                "answer": "British English", 
                "answer_id": "m.01bvf", 
                "aliases": []
            }, 
            {
                "answer": "Scottish English", 
                "answer_id": "m.01v58_", 
                "aliases": []
            }, 
            {
                "answer": "Old English", 
                "answer_id": "m.05p2d", 
                "aliases": [
                    "Old English", 
                    "Anglo-Saxon", 
                    "Old", 
                    "English, Old (ca.450-1100)", 
                    "English"
                ]
            }, 
            {
                "answer": "Scottish Gaelic", 
                "answer_id": "m.070zw", 
                "aliases": [
                    "Scottish Gaelic language", 
                    "G\u00e0idhlig", 
                    "Albannach Gaidhlig", 
                    "Erse", 
                    "Gaelic", 
                    "Gaelic, Scottish", 
                    "Scots Gaelic", 
                    "Gaelic, Scottish Language"
                ]
            }, 
            {
                "answer": "Scots Language", 
                "answer_id": "m.0h407", 
                "aliases": [
                    "Scots"
                ]
            }
        ], 
        "created": "2018-02-13T02:01:10"
    }, 
    {
        "ID": "WebQTest-998_920d8cef50c023e0a693d393bf609007", 
        "webqsp_ID": "WebQTest-998", 
        "webqsp_question": "when was the last time knicks won the championship", 
        "machine_question": "when was the last time the team won the 1973 NBA Finals championship won the championship", 
        "question": "The team that won the 1973 NBA Finals Championship last won the Championship in what year?", 
        "sparql": "PREFIX ns: <http://rdf.freebase.com/ns/>\nSELECT DISTINCT ?x\nWHERE {\nFILTER (?x != ?c)\nFILTER (!isLiteral(?x) OR lang(?x) = '' OR langMatches(lang(?x), 'en'))\n?c ns:sports.sports_team.championships ns:m.0cs1kg . \n?c ns:sports.sports_team.championships ?x .\n?x ns:time.event.start_date ?sk0 .\n}\nORDER BY DESC(xsd:datetime(?sk0))\nLIMIT 1\n", 
        "compositionality_type": "composition", 
        "answers": [
            {
                "answer": "1973 NBA Finals", 
                "answer_id": "m.0cs1kg", 
                "aliases": []
            }
        ], 
        "created": "2018-02-13T04:30:37"
    }, 
    {
        "ID": "WebQTest-1603_b4ae7897b99465887b3e5c37c392fce6", 
        "webqsp_ID": "WebQTest-1603", 
        "webqsp_question": "what is the sacred text of daoism", 
        "machine_question": "what is the sacred text of the religion place of worship is Zhi Nan Temple", 
        "question": "What is the sacred text of the region that worships at Zhi Nan Temple?", 
        "sparql": "PREFIX ns: <http://rdf.freebase.com/ns/>\nSELECT DISTINCT ?x\nWHERE {\nFILTER (?x != ?c)\nFILTER (!isLiteral(?x) OR lang(?x) = '' OR langMatches(lang(?x), 'en'))\n?c ns:religion.religion.places_of_worship ns:m.0260jdk . \n?c ns:religion.religion.texts ?x .\n}\n", 
        "compositionality_type": "composition", 
        "answers": [
            {
                "answer": "Zhuang Zhou", 
                "answer_id": "m.0164zy", 
                "aliases": [
                    "Master Chuang", 
                    "Chuang Tsu", 
                    "Zhuangzi.", 
                    "Chuang Tzu", 
                    "Zhuangzi", 
                    "Chuang Tse", 
                    "Zhuang Zhou", 
                    "Chouang-Dsi"
                ]
            }, 
            {
                "answer": "Tao Te Ching", 
                "answer_id": "m.02czn", 
                "aliases": [
                    "Tao Teh King", 
                    "Dao De Jing"
                ]
            }, 
            {
                "answer": "I Ching", 
                "answer_id": "m.03ydb", 
                "aliases": [
                    "Y\u00ec J\u012bng", 
                    "Zhouyi", 
                    "Classic of Changes", 
                    "Book of Changes"
                ]
            }, 
            {
                "answer": "Daozang", 
                "answer_id": "m.05blr4", 
                "aliases": []
            }
        ], 
        "created": "2018-02-13T05:38:56"
    }, 
    {
        "ID": "WebQTrn-3076_b7091e5f0b3cf186243e07d0bb0ee512", 
        "webqsp_ID": "WebQTrn-3076", 
        "webqsp_question": "what channel does anderson cooper come on", 
        "machine_question": "what channel does the person education institution is Trumbull College come on", 
        "question": "The person who attended Trumbull College comes on what channel?", 
        "sparql": "PREFIX ns: <http://rdf.freebase.com/ns/>\nSELECT DISTINCT ?x\nWHERE {\nFILTER (?x != ?c)\nFILTER (!isLiteral(?x) OR lang(?x) = '' OR langMatches(lang(?x), 'en'))\n?c ns:people.person.education ?k .\n?k ns:education.education.institution ns:m.04r318 . \n?c ns:people.person.employment_history ?y .\n?y ns:business.employment_tenure.company ?x .\n?x ns:common.topic.notable_types ns:m.03w5clp .\n}\n", 
        "compositionality_type": "composition", 
        "answers": [
            {
                "answer": "CNN", 
                "answer_id": "m.0gsgr", 
                "aliases": [
                    "CNN/U.S.", 
                    "Cable News Network", 
                    "Cable News Network Inc"
                ]
            }
        ], 
        "created": "2018-02-13T01:11:13"
    }, 
    {
        "ID": "WebQTrn-3548_020f93c678f201a55199a0c40d829467", 
        "webqsp_ID": "WebQTrn-3548", 
        "webqsp_question": "where did charlton heston live", 
        "machine_question": "where did charlton heston live and the location time zone is Pacific Time Zone", 
        "question": "Where did Charlton Heston live in the Pacific Time Zone?", 
        "sparql": "PREFIX ns: <http://rdf.freebase.com/ns/>\nSELECT DISTINCT ?x\nWHERE {\nFILTER (?x != ns:m.0chsq)\nFILTER (!isLiteral(?x) OR lang(?x) = '' OR langMatches(lang(?x), 'en'))\nns:m.0chsq ns:people.person.places_lived ?y .\n?y ns:people.place_lived.location ?x .\n?x ns:location.location.time_zones ns:m.02lcqs . \n}", 
        "compositionality_type": "conjunction", 
        "answers": [
            {
                "answer": "Los Angeles", 
                "answer_id": "m.030qb3t", 
                "aliases": [
                    "Los Angeles, California, USA", 
                    "LA", 
                    "Los Angeles, California", 
                    "Los Angeles, USA", 
                    "City of Angels", 
                    "L.A.", 
                    "Los Angeles County / Los Angeles city", 
                    "Los Angeles, CA"
                ]
            }
        ], 
        "created": "2018-02-13T02:11:08"
    }, 
    {
        "ID": "WebQTrn-1405_8e65d827de2fe8fd8b11773997effdf0", 
        "webqsp_ID": "WebQTrn-1405", 
        "webqsp_question": "where did president kennedy go to school", 
        "machine_question": "where did president kennedy go to school and the educational institution newspaper is Nassau Weekly", 
        "question": "What college did President Kennedy attend that has the newspaper Nassau Weekly?", 
        "sparql": "PREFIX ns: <http://rdf.freebase.com/ns/>\nSELECT DISTINCT ?x\nWHERE {\nFILTER (?x != ns:m.0d3k14)\nFILTER (!isLiteral(?x) OR lang(?x) = '' OR langMatches(lang(?x), 'en'))\nns:m.0d3k14 ns:people.person.education ?y .\n?y ns:education.education.institution ?x .\n?x ns:education.educational_institution.newspaper ns:m.08zwhp . \n}", 
        "compositionality_type": "conjunction", 
        "answers": [
            {
                "answer": "Princeton University", 
                "answer_id": "m.05zl0", 
                "aliases": [
                    "Princeton University, Borough of Princeton", 
                    "Princeton University, main campus", 
                    "Princeton"
                ]
            }
        ], 
        "created": "2018-02-12T22:14:23"
    }, 
    {
        "ID": "WebQTrn-943_1ef15e22372df70baf01b72850deb14d", 
        "webqsp_ID": "WebQTrn-943", 
        "webqsp_question": "what are the names of michael jackson movies", 
        "machine_question": "what are the names of the artist had a concert tour named HIStory World Tour movies", 
        "question": "What are the movies that the artist who had the \"HIStory World Tour\" has been in?", 
        "sparql": "PREFIX ns: <http://rdf.freebase.com/ns/>\nSELECT DISTINCT ?x\nWHERE {\nFILTER (?x != ?c)\nFILTER (!isLiteral(?x) OR lang(?x) = '' OR langMatches(lang(?x), 'en'))\n?c ns:music.artist.concert_tours ns:m.09x1nf . \n?c ns:film.actor.film ?y .\n?y ns:film.performance.film ?x .\n}\n", 
        "compositionality_type": "composition", 
        "answers": [
            {
                "answer": "Michael Jackson Unmasked", 
                "answer_id": "m.0_cdzjp", 
                "aliases": [
                    "Michael Jackson History: The King of Pop 1958-2009"
                ]
            }, 
            {
                "answer": "The Wiz", 
                "answer_id": "m.027fwmt", 
                "aliases": []
            }, 
            {
                "answer": "Captain EO", 
                "answer_id": "m.02qsfv", 
                "aliases": [
                    "Captain Eo"
                ]
            }, 
            {
                "answer": "Men in Black II", 
                "answer_id": "m.031t2d", 
                "aliases": [
                    "Muzi v cern\u00e9m 2", 
                    "Men in black II (Hombres de negro II)", 
                    "MIIB", 
                    "Oi andres me ta mavra II", 
                    "Faceci w czerni II", 
                    "Men in Black 2", 
                    "MIIB - Homens de Preto II", 
                    "\u041b\u044e\u0434\u0438 \u0432 \u0427\u0451\u0440\u043d\u043e\u043c 2", 
                    "Barbati \u00een negru II", 
                    "Men in Black - S\u00f6t\u00e9t zsaruk 2.", 
                    "MIIB Homens de Negro II", 
                    "Hombres de negro II", 
                    "Siyah giyen adamlar II", 
                    "Hommes en noir II", 
                    "MIB II - miehet mustissa 2", 
                    "MIB 2"
                ]
            }, 
            {
                "answer": "Moonwalker", 
                "answer_id": "m.036ytw", 
                "aliases": [
                    "Michael Jackson: Moonwalker"
                ]
            }, 
            {
                "answer": "Motown 25: Yesterday, Today, Forever", 
                "answer_id": "m.05f5tq", 
                "aliases": []
            }, 
            {
                "answer": "Free to Be\u2026 You and Me", 
                "answer_id": "m.065mvrb", 
                "aliases": [
                    "Free To Be... You And Me"
                ]
            }, 
            {
                "answer": "Michael Jackson's Ghosts", 
                "answer_id": "m.07hqvg", 
                "aliases": [
                    "Ghosts"
                ]
            }, 
            {
                "answer": "Miss Cast Away", 
                "answer_id": "m.0djb05y", 
                "aliases": [
                    "Michael Jackson in Neverlanding Story", 
                    "Miss Cast Away and the Island Girls", 
                    "Silly Movie 2", 
                    "Miss Castaway and the Island Girls"
                ]
            }, 
            {
                "answer": "Captain EO Promo & Pre-show", 
                "answer_id": "m.0v435l3", 
                "aliases": []
            }, 
            {
                "answer": "Wiz on Down the Road", 
                "answer_id": "m.0v43grn", 
                "aliases": []
            }
        ], 
        "created": "2018-02-12T21:22:49"
    }, 
    {
        "ID": "WebQTrn-932_c071c552853eb739a0ff0c67bb9ed366", 
        "webqsp_ID": "WebQTrn-932", 
        "webqsp_question": "what are the major religions in russia", 
        "machine_question": "what are the major religions in the location that appointed Dmitry Medvedev to govermental position", 
        "question": "What major religions are in the country with Dmitry Medvedev as a government official?", 
        "sparql": "PREFIX ns: <http://rdf.freebase.com/ns/>\nSELECT DISTINCT ?x\nWHERE {\nFILTER (?x != ?c)\nFILTER (!isLiteral(?x) OR lang(?x) = '' OR langMatches(lang(?x), 'en'))\n?c ns:government.governmental_jurisdiction.governing_officials ?k .\n?k ns:government.government_position_held.appointed_by ns:m.08wdkk . \n?c ns:location.statistical_region.religions ?y .\n?y ns:location.religion_percentage.religion ?x .\n}\n", 
        "compositionality_type": "composition", 
        "answers": [
            {
                "answer": "Russian Orthodox Church", 
                "answer_id": "m.0b06q", 
                "aliases": [
                    "Russian Orthodox"
                ]
            }, 
            {
                "answer": "Islam", 
                "answer_id": "m.0flw86", 
                "aliases": []
            }
        ], 
        "created": "2018-02-12T21:21:48"
    }, 
    {
        "ID": "WebQTrn-2512_cfcb8ee843e79059ec902e53426d5d04", 
        "webqsp_ID": "WebQTrn-2512", 
        "webqsp_question": "which island in greece", 
        "machine_question": "which island in the location that appointed Antonis Samaras to govermental position", 
        "question": "What islands location has Antonis Samaras as a government officer?", 
        "sparql": "PREFIX ns: <http://rdf.freebase.com/ns/>\nSELECT DISTINCT ?x\nWHERE {\nFILTER (?x != ?c)\nFILTER (!isLiteral(?x) OR lang(?x) = '' OR langMatches(lang(?x), 'en'))\n?c ns:government.governmental_jurisdiction.governing_officials ?k .\n?k ns:government.government_position_held.appointed_by ns:m.054q0_ . \n?c ns:base.aareas.schema.administrative_area.administrative_children ?x .\n?x ns:common.topic.notable_types ns:m.01xxv5b .\n}\n", 
        "compositionality_type": "composition", 
        "answers": [
            {
                "answer": "Ionian Islands", 
                "answer_id": "m.01s2g1", 
                "aliases": [
                    "Eptanisa"
                ]
            }
        ], 
        "created": "2018-02-13T00:04:25"
    }, 
    {
        "ID": "WebQTrn-1486_cfcb8ee843e79059ec902e53426d5d04", 
        "webqsp_ID": "WebQTrn-1486", 
        "webqsp_question": "what form of government does greece use", 
        "machine_question": "what form of government does the location that appointed Antonis Samaras to govermental position use", 
        "question": "What form of government is run in the country where Antonis Samaras is in government?", 
        "sparql": "PREFIX ns: <http://rdf.freebase.com/ns/>\nSELECT DISTINCT ?x\nWHERE {\nFILTER (?x != ?c)\nFILTER (!isLiteral(?x) OR lang(?x) = '' OR langMatches(lang(?x), 'en'))\n?c ns:government.governmental_jurisdiction.governing_officials ?k .\n?k ns:government.government_position_held.appointed_by ns:m.054q0_ . \n?c ns:location.country.form_of_government ?x .\n}\n", 
        "compositionality_type": "composition", 
        "answers": [
            {
                "answer": "Parliamentary system", 
                "answer_id": "m.018wl5", 
                "aliases": [
                    "Parliamentary", 
                    "Parliamentary Democracy"
                ]
            }, 
            {
                "answer": "Constitutional republic", 
                "answer_id": "m.0c9rw5", 
                "aliases": [
                    "Constitutional"
                ]
            }
        ], 
        "created": "2018-02-12T22:26:02"
    }, 
    {
        "ID": "WebQTrn-2904_56cf05bd5b41e04f4358490ed3e81619", 
        "webqsp_ID": "WebQTrn-2904", 
        "webqsp_question": "where did lauren conrad live", 
        "machine_question": "where did lauren conrad live and is the pro athlete born here that started his career 1999", 
        "question": "Where did Lauren Conrad live, and is the pro athlete that was born here, that began his career in 1999?", 
        "sparql": "PREFIX ns: <http://rdf.freebase.com/ns/>\nSELECT DISTINCT ?x\nWHERE {\nFILTER (?x != ns:m.0dq9wx)\nFILTER (!isLiteral(?x) OR lang(?x) = '' OR langMatches(lang(?x), 'en'))\nns:m.0dq9wx ns:people.person.places_lived ?y .\n?y ns:people.place_lived.location ?x .\n?x ns:location.location.people_born_here ?c .\n?c ns:sports.pro_athlete.career_start \"1999\"^^xsd:dateTime . \n}", 
        "compositionality_type": "conjunction", 
        "answers": [
            {
                "answer": "Los Angeles", 
                "answer_id": "m.030qb3t", 
                "aliases": [
                    "Los Angeles, California, USA", 
                    "LA", 
                    "Los Angeles, California", 
                    "Los Angeles, USA", 
                    "City of Angels", 
                    "L.A.", 
                    "Los Angeles County / Los Angeles city", 
                    "Los Angeles, CA"
                ]
            }
        ], 
        "created": "2018-02-13T00:52:41"
    }, 
    {
        "ID": "WebQTest-702_63a0a028edc3e6ec64075a70c479e2d5", 
        "webqsp_ID": "WebQTest-702", 
        "webqsp_question": "what highschool did emily osment go to", 
        "machine_question": "what highschool did the artist had a concert tour named Clap Your Hands Tour go to", 
        "question": "The artist who had the concert tour named Clap Your Hands  went to what high school?", 
        "sparql": "PREFIX ns: <http://rdf.freebase.com/ns/>\nSELECT DISTINCT ?x\nWHERE {\nFILTER (?x != ?c)\nFILTER (!isLiteral(?x) OR lang(?x) = '' OR langMatches(lang(?x), 'en'))\n?c ns:music.artist.concert_tours ns:m.0j7mgkq . \n?c ns:people.person.education ?y .\n?y ns:education.education.institution ?x .\n?x ns:base.schemastaging.non_profit_extra.classification ns:m.0ppgzhv .\n}\n", 
        "compositionality_type": "composition", 
        "answers": [
            {
                "answer": "Flintridge Preparatory School", 
                "answer_id": "m.07q2jh", 
                "aliases": [
                    "Flintridge Preparatory"
                ]
            }
        ], 
        "created": "2018-02-13T04:01:17"
    }, 
    {
        "ID": "WebQTrn-1812_3e805a8103adcdab964dbb44b8267714", 
        "webqsp_ID": "WebQTrn-1812", 
        "webqsp_question": "what countries are in the caribbean", 
        "machine_question": "what countries are in the caribbean and is the country that contains Gros Islet Quarter", 
        "question": "Which caribbean country contains the Gors Islet Quarter?", 
        "sparql": "PREFIX ns: <http://rdf.freebase.com/ns/>\nSELECT DISTINCT ?x\nWHERE {\nFILTER (?x != ns:m.0261m)\nFILTER (!isLiteral(?x) OR lang(?x) = '' OR langMatches(lang(?x), 'en'))\nns:m.0261m ns:location.location.contains ?x .\n?x ns:common.topic.notable_types ns:m.01mp .\n?x ns:location.country.administrative_divisions ns:m.03cmb2 . \n}", 
        "compositionality_type": "conjunction", 
        "answers": [
            {
                "answer": "Saint Lucia", 
                "answer_id": "m.06s0l", 
                "aliases": [
                    "St. Lucia"
                ]
            }
        ], 
        "created": "2018-02-12T22:53:34"
    }, 
    {
        "ID": "WebQTest-1001_c37d03f83c340eed2e3dd5288f407580", 
        "webqsp_ID": "WebQTest-1001", 
        "webqsp_question": "what country is nicki minaj from", 
        "machine_question": "what country is the artist had a concert tour named Pink Friday Tour from", 
        "question": "The artist with the tour named Pink Friday Tour came from what country?", 
        "sparql": "PREFIX ns: <http://rdf.freebase.com/ns/>\nSELECT DISTINCT ?x\nWHERE {\nFILTER (?x != ?c)\nFILTER (!isLiteral(?x) OR lang(?x) = '' OR langMatches(lang(?x), 'en'))\n?c ns:music.artist.concert_tours ns:m.0j7m7wq . \n?c ns:people.person.nationality ?x .\n}\n", 
        "compositionality_type": "composition", 
        "answers": [
            {
                "answer": "United States of America", 
                "answer_id": "m.09c7w0", 
                "aliases": [
                    "U.S. of A.", 
                    "Estats Units d'Am\u00e8rica", 
                    "USA", 
                    "U.S.A.", 
                    "U.S.", 
                    "The States", 
                    "US", 
                    "United States", 
                    "America"
                ]
            }
        ], 
        "created": "2018-02-13T04:30:52"
    }, 
    {
        "ID": "WebQTest-1301_020f93c678f201a55199a0c40d829467", 
        "webqsp_ID": "WebQTest-1301", 
        "webqsp_question": "what are fun things to do in sacramento ca", 
        "machine_question": "what are fun things to do in sacramento ca and the location time zone is Pacific Time Zone", 
        "question": "What are two good things to do when you're in Sacramento, CA in the Pacific Time Zone?", 
        "sparql": "PREFIX ns: <http://rdf.freebase.com/ns/>\nSELECT DISTINCT ?x\nWHERE {\nFILTER (?x != ns:m.07bcn)\nFILTER (!isLiteral(?x) OR lang(?x) = '' OR langMatches(lang(?x), 'en'))\nns:m.07bcn ns:travel.travel_destination.tourist_attractions ?x .\n?x ns:location.location.time_zones ns:m.02lcqs . \n}", 
        "compositionality_type": "conjunction", 
        "answers": [
            {
                "answer": "Raging Waters Sacramento", 
                "answer_id": "m.03mdd2l", 
                "aliases": []
            }, 
            {
                "answer": "Folsom Lake", 
                "answer_id": "m.0d7nnr", 
                "aliases": []
            }
        ], 
        "created": "2018-02-13T05:03:59"
    }, 
    {
        "ID": "WebQTrn-2148_cac1786667e05d667a11e64176d513f1", 
        "webqsp_ID": "WebQTrn-2148", 
        "webqsp_question": "when did the orioles win the pennant", 
        "machine_question": "when did the the team won the 1983 World Series championship win the pennant", 
        "question": "When did the champion of the 1983 World Series win the pennant?", 
        "sparql": "PREFIX ns: <http://rdf.freebase.com/ns/>\nSELECT DISTINCT ?x\nWHERE {\nFILTER (?x != ?c)\nFILTER (!isLiteral(?x) OR lang(?x) = '' OR langMatches(lang(?x), 'en'))\n?c ns:sports.sports_team.championships ns:m.046_p6 . \n?c ns:sports.sports_team.championships ?x .\n}\n", 
        "compositionality_type": "composition", 
        "answers": [
            {
                "answer": "1983 World Series", 
                "answer_id": "m.046_p6", 
                "aliases": [
                    "1983 World"
                ]
            }, 
            {
                "answer": "1970 World Series", 
                "answer_id": "m.04jg7y", 
                "aliases": [
                    "1970 World"
                ]
            }, 
            {
                "answer": "1966 World Series", 
                "answer_id": "m.04td_d", 
                "aliases": [
                    "1966 World"
                ]
            }
        ], 
        "created": "2018-02-12T23:29:30"
    }, 
    {
        "ID": "WebQTrn-1112_80f2b6d0b0be2a02253089622461bd98", 
        "webqsp_ID": "WebQTrn-1112", 
        "webqsp_question": "what are five countries that border france", 
        "machine_question": "what are five countries that border france and the country capital is City of Brussels", 
        "question": "What country bordering France that has Brussel as its capital?", 
        "sparql": "PREFIX ns: <http://rdf.freebase.com/ns/>\nSELECT DISTINCT ?x\nWHERE {\nFILTER (?x != ns:m.0f8l9c)\nFILTER (!isLiteral(?x) OR lang(?x) = '' OR langMatches(lang(?x), 'en'))\nns:m.0f8l9c ns:location.location.adjoin_s ?y .\n?y ns:location.adjoining_relationship.adjoins ?x .\n?x ns:common.topic.notable_types ns:m.01mp .\n?x ns:location.country.capital ns:m.02rnbv . \n}", 
        "compositionality_type": "conjunction", 
        "answers": [
            {
                "answer": "Belgium", 
                "answer_id": "m.0154j", 
                "aliases": [
                    "Belgique", 
                    "Belgi\u00eb", 
                    "Kingdom of Belgium"
                ]
            }
        ], 
        "created": "2018-02-12T21:45:31"
    }, 
    {
        "ID": "WebQTrn-2632_6227cb6944276fc33277773723769607", 
        "webqsp_ID": "WebQTrn-2632", 
        "webqsp_question": "what city has the largest population in mexico", 
        "machine_question": "what city has the largest population in the country that contains Michoac\u00c3\u00a1n", 
        "question": "What city which contains Michoacan has the largest population?", 
        "sparql": "PREFIX ns: <http://rdf.freebase.com/ns/>\nSELECT DISTINCT ?x\nWHERE {\nFILTER (?x != ?c)\nFILTER (!isLiteral(?x) OR lang(?x) = '' OR langMatches(lang(?x), 'en'))\n?c ns:location.country.administrative_divisions ns:m.01btry . \n?c ns:location.location.contains ?x .\n?x ns:common.topic.notable_types ns:m.01m9 .\n?x ns:topic_server.population_number ?sk0 .\n}\nORDER BY DESC(xsd:float(?sk0))\nLIMIT 1\n", 
        "compositionality_type": "composition", 
        "answers": [
            {
                "answer": "Mexico City", 
                "answer_id": "m.04sqj", 
                "aliases": [
                    "La Ciudad de los Palacios", 
                    "Zona Metropolitana de la Ciudad de M\u00e9xico", 
                    "The Federal District", 
                    "Ciudad de M\u00e9xico", 
                    "Mexico", 
                    "DF", 
                    "M\u00e9xico, D.F.", 
                    "D.F.", 
                    "Mexico City Metropolitan Zone", 
                    "Distritofederal", 
                    "Tenochtitl\u00e1n", 
                    "Mexican Federal District", 
                    "M\u00e9xico", 
                    "Zona Metropolitana del Valle de M\u00e9xico", 
                    "Metropolitan Area of the Valley of Mexico", 
                    "Ciudad De Mexico", 
                    "Distrito Federal", 
                    "Cidade do M\u00e9xico", 
                    "Greater Mexico City"
                ]
            }
        ], 
        "created": "2018-02-13T00:21:28"
    }, 
    {
        "ID": "WebQTest-1554_de764c65ac3c6a870a407dd9cafd0dc9", 
        "webqsp_ID": "WebQTest-1554", 
        "webqsp_question": "what is the official language of brazil now", 
        "machine_question": "what is the official language of the currency used in the country is Brazilian real now", 
        "question": "In the country that uses the Brazilian Real as currency, what is the official spoken language?", 
        "sparql": "PREFIX ns: <http://rdf.freebase.com/ns/>\nSELECT DISTINCT ?x\nWHERE {\nFILTER (?x != ?c)\nFILTER (!isLiteral(?x) OR lang(?x) = '' OR langMatches(lang(?x), 'en'))\n?c ns:location.country.currency_used ns:m.03385m . \n?c ns:location.country.official_language ?x .\n}\n", 
        "compositionality_type": "composition", 
        "answers": [
            {
                "answer": "Portuguese Language", 
                "answer_id": "m.05zjd", 
                "aliases": [
                    "Portuguese", 
                    "Portugese", 
                    "Portuguese language", 
                    "Portugu\u00eas"
                ]
            }
        ], 
        "created": "2018-02-13T05:33:21"
    }, 
    {
        "ID": "WebQTrn-2465_e407ce21aab404011d8140df42f712d5", 
        "webqsp_ID": "WebQTrn-2465", 
        "webqsp_question": "what do you speak in singapore", 
        "machine_question": "what do you speak in the country that has the national anthem Majulah Singapura", 
        "question": "Which languages are spoken in the country with the national anthem Majulah Sinapura?", 
        "sparql": "PREFIX ns: <http://rdf.freebase.com/ns/>\nSELECT DISTINCT ?x\nWHERE {\nFILTER (?x != ?c)\nFILTER (!isLiteral(?x) OR lang(?x) = '' OR langMatches(lang(?x), 'en'))\n?c ns:location.country.national_anthem ?k .\n?k ns:government.national_anthem_of_a_country.anthem ns:m.01j77_ . \n?c ns:location.country.languages_spoken ?x .\n}\n", 
        "compositionality_type": "composition", 
        "answers": [
            {
                "answer": "Chinese language", 
                "answer_id": "m.01r2l", 
                "aliases": [
                    "Sinitic language family", 
                    "Chinese language family", 
                    "Chinese"
                ]
            }, 
            {
                "answer": "English Language", 
                "answer_id": "m.02h40lc", 
                "aliases": [
                    "Sekgoa", 
                    "Anglit", 
                    "English language", 
                    "English"
                ]
            }, 
            {
                "answer": "Tamil Language", 
                "answer_id": "m.07c9s", 
                "aliases": [
                    "Thamizh", 
                    "Tamal", 
                    "Damulian", 
                    "Tamili", 
                    "Tamalsan", 
                    "Tambul", 
                    "Tamil"
                ]
            }
        ], 
        "created": "2018-02-12T23:59:26"
    }, 
    {
        "ID": "WebQTrn-475_aba5be3cab85b97a0ed99632fda218eb", 
        "webqsp_ID": "WebQTrn-475", 
        "webqsp_question": "what countries did czechoslovakia become", 
        "machine_question": "what countries did czechoslovakia become and the country capital is Bratislava", 
        "question": "What country did Czechoslovakia become whose capital is Bratislava?", 
        "sparql": "PREFIX ns: <http://rdf.freebase.com/ns/>\nSELECT DISTINCT ?x\nWHERE {\nFILTER (?x != ns:m.01mk6)\nFILTER (!isLiteral(?x) OR lang(?x) = '' OR langMatches(lang(?x), 'en'))\nns:m.01mk6 ns:base.datedlocationtest.dated_location_test.broke_up_into ?y .\n?y ns:base.datedlocationtest.dated_location_break_up.new_locations ?x .\n?x ns:location.country.capital ns:m.015g7 . \n}", 
        "compositionality_type": "conjunction", 
        "answers": [
            {
                "answer": "Slovakia", 
                "answer_id": "m.06npd", 
                "aliases": [
                    "Slovensko", 
                    "The Slovak Republic"
                ]
            }
        ], 
        "created": "2018-02-12T20:33:11"
    }, 
    {
        "ID": "WebQTrn-2572_417150a16d65691aae45691fd57d05d4", 
        "webqsp_ID": "WebQTrn-2572", 
        "webqsp_question": "which states does the connecticut river flow through", 
        "machine_question": "which states does the connecticut river flow through and is the us state that has a capital named Concord", 
        "question": "Which state with the capital of Concord does the Connecticut River flow through?", 
        "sparql": "PREFIX ns: <http://rdf.freebase.com/ns/>\nSELECT DISTINCT ?x\nWHERE {\nFILTER (?x != ns:m.01ldvs)\nFILTER (!isLiteral(?x) OR lang(?x) = '' OR langMatches(lang(?x), 'en'))\nns:m.01ldvs ns:location.location.partially_containedby ?x .\n?x ns:common.topic.notable_types ns:m.0kpys4 .\n?x ns:location.us_state.capital ns:m.01x96 . \n}", 
        "compositionality_type": "conjunction", 
        "answers": [
            {
                "answer": "New Hampshire", 
                "answer_id": "m.059f4", 
                "aliases": [
                    "NH", 
                    "Granite State"
                ]
            }
        ], 
        "created": "2018-02-13T00:11:26"
    }, 
    {
        "ID": "WebQTrn-399_34c227888d62a048623725e4ee0c7b96", 
        "webqsp_ID": "WebQTrn-399", 
        "webqsp_question": "what is in liverpool england", 
        "machine_question": "what is in liverpool england and is the museum that was established in 1877", 
        "question": "What museum established in 1877 is in Liverpool, England?", 
        "sparql": "PREFIX ns: <http://rdf.freebase.com/ns/>\nSELECT DISTINCT ?x\nWHERE {\nFILTER (?x != ns:m.04lh6)\nFILTER (!isLiteral(?x) OR lang(?x) = '' OR langMatches(lang(?x), 'en'))\nns:m.04lh6 ns:travel.travel_destination.tourist_attractions ?x .\n?x ns:architecture.museum.established \"1877\"^^xsd:dateTime . \n}", 
        "compositionality_type": "conjunction", 
        "answers": [
            {
                "answer": "Walker Art Gallery", 
                "answer_id": "m.02c3ll", 
                "aliases": [
                    "Walker Art Gallery, Liverpool"
                ]
            }
        ], 
        "created": "2018-02-12T20:21:11"
    }, 
    {
        "ID": "WebQTrn-2242_654f856c56100431d88e4f6be60dbb4f", 
        "webqsp_ID": "WebQTrn-2242", 
        "webqsp_question": "who played obi wan kenobi in phantom menace", 
        "machine_question": "who played obi wan kenobi in the film has a charcter named Sach\u00c3\u00a9", 
        "question": "What actor played Obi Wan Kenobi in the film which has a character called Sach\u00c3\u00a9?", 
        "sparql": "PREFIX ns: <http://rdf.freebase.com/ns/>\nSELECT DISTINCT ?x\nWHERE {\nFILTER (?x != ?c)\nFILTER (!isLiteral(?x) OR lang(?x) = '' OR langMatches(lang(?x), 'en'))\n?c ns:film.film.starring ?k .\n?k ns:film.performance.character ns:m.0hgx028 . \n?c ns:film.film.starring ?y .\n?y ns:film.performance.actor ?x .\n?y ns:film.performance.character ns:m.0fkm7 .\n}\n", 
        "compositionality_type": "composition", 
        "answers": [
            {
                "answer": "Ewan McGregor", 
                "answer_id": "m.0k269", 
                "aliases": [
                    "Ewan Gordon McGregor OBE", 
                    "Ewan MacGregor", 
                    "Ewan Gordon McGregor", 
                    "Ewan Gordon McGregor, OBE"
                ]
            }
        ], 
        "created": "2018-02-12T23:37:55"
    }, 
    {
        "ID": "WebQTrn-237_993bf41507919333b3a87058c5072363", 
        "webqsp_ID": "WebQTrn-237", 
        "webqsp_question": "what is the name of the pittsburgh steelers head coach", 
        "machine_question": "what is the name of the the sports team with the fight song Renegade head coach", 
        "question": "What is the name of the head coach of the sports team whose fight song is \"Renegade\"?", 
        "sparql": "PREFIX ns: <http://rdf.freebase.com/ns/>\nSELECT DISTINCT ?x\nWHERE {\nFILTER (?x != ?c)\nFILTER (!isLiteral(?x) OR lang(?x) = '' OR langMatches(lang(?x), 'en'))\n?c ns:sports.sports_team.fight_song ns:m.06c78r . \n?c ns:american_football.football_team.current_head_coach ?x .\n}\n", 
        "compositionality_type": "composition", 
        "answers": [
            {
                "answer": "Mike Tomlin", 
                "answer_id": "m.0c5f_j", 
                "aliases": [
                    "Michael Tomlin", 
                    "Michael Pettaway Tomlin"
                ]
            }
        ], 
        "created": "2018-02-12T20:05:24"
    }, 
    {
        "ID": "WebQTrn-921_14f7e9324d83d176c3831d682932bd02", 
        "webqsp_ID": "WebQTrn-921", 
        "webqsp_question": "what is vanderbilt 's mascot", 
        "machine_question": "what is the education institution has a sports team named Vanderbilt Commodores football 's mascot", 
        "question": "What is the name of the masoct that represents the Vanderbilt Commodores football team?", 
        "sparql": "PREFIX ns: <http://rdf.freebase.com/ns/>\nSELECT DISTINCT ?x\nWHERE {\nFILTER (?x != ?c)\nFILTER (!isLiteral(?x) OR lang(?x) = '' OR langMatches(lang(?x), 'en'))\n?c ns:education.educational_institution.sports_teams ns:m.026v18h . \n?c ns:education.educational_institution.mascot ?x .\n}\n", 
        "compositionality_type": "composition", 
        "answers": [
            {
                "answer": "Vanderbilt University Mr. Commodore", 
                "answer_id": "m.05k6hxh", 
                "aliases": []
            }
        ], 
        "created": "2018-02-12T21:20:40"
    }, 
    {
        "ID": "WebQTrn-3512_f1ac0a9687f078ed2dc8d657bbb275f5", 
        "webqsp_ID": "WebQTrn-3512", 
        "webqsp_question": "who was vice president under lincoln", 
        "machine_question": "who was vice president under lincoln and held his govermental position from 1848-06-08", 
        "question": "Who was the vice president under Lincoln and held his governmental position from June 8, 1848?", 
        "sparql": "PREFIX ns: <http://rdf.freebase.com/ns/>\nSELECT DISTINCT ?x\nWHERE {\nFILTER (?x != ns:m.0gzh)\nFILTER (!isLiteral(?x) OR lang(?x) = '' OR langMatches(lang(?x), 'en'))\nns:m.0gzh ns:government.us_president.vice_president ?x .\n?x ns:government.politician.government_positions_held ?c .\n?c ns:government.government_position_held.from \"1848-06-08\"^^xsd:dateTime . \n}", 
        "compositionality_type": "conjunction", 
        "answers": [
            {
                "answer": "Hannibal Hamlin", 
                "answer_id": "m.03mpk", 
                "aliases": []
            }
        ], 
        "created": "2018-02-13T02:07:35"
    }, 
    {
        "ID": "WebQTest-1138_872253e47dd6ddaa213ff31eeda8783b", 
        "webqsp_ID": "WebQTest-1138", 
        "webqsp_question": "where honduras in the world", 
        "machine_question": "where honduras in the world and the location time zone is Eastern Time Zone", 
        "question": "What continent within the Eastern Time Zone is home to Honduras?", 
        "sparql": "PREFIX ns: <http://rdf.freebase.com/ns/>\nSELECT DISTINCT ?x\nWHERE {\nFILTER (?x != ns:m.03h2c)\nFILTER (!isLiteral(?x) OR lang(?x) = '' OR langMatches(lang(?x), 'en'))\nns:m.03h2c ns:location.location.containedby ?x .\n?x ns:location.location.time_zones ns:m.02hcv8 . \n}", 
        "compositionality_type": "conjunction", 
        "answers": [
            {
                "answer": "Latin America", 
                "answer_id": "m.04pnx", 
                "aliases": []
            }, 
            {
                "answer": "North America", 
                "answer_id": "m.059g4", 
                "aliases": []
            }, 
            {
                "answer": "Americas", 
                "answer_id": "m.07c5l", 
                "aliases": [
                    "New World", 
                    "The Americas", 
                    "America"
                ]
            }
        ], 
        "created": "2018-02-13T04:47:19"
    }, 
    {
        "ID": "WebQTrn-2928_b0ec4891d80892c6499b17b0c8c363e2", 
        "webqsp_ID": "WebQTrn-2928", 
        "webqsp_question": "who did president kennedy marry", 
        "machine_question": "who did president the person notable with the medical condition Addison's disease marry", 
        "question": "Who did the President with Addison's disease marry?", 
        "sparql": "PREFIX ns: <http://rdf.freebase.com/ns/>\nSELECT DISTINCT ?x\nWHERE {\nFILTER (?x != ?c)\nFILTER (!isLiteral(?x) OR lang(?x) = '' OR langMatches(lang(?x), 'en'))\n?c ns:medicine.notable_person_with_medical_condition.condition ns:m.01xtf2 . \n?c ns:people.person.spouse_s ?y .\n?y ns:people.marriage.spouse ?x .\n?y ns:people.marriage.type_of_union ns:m.04ztj .\n}\n", 
        "compositionality_type": "composition", 
        "answers": [
            {
                "answer": "Jacqueline Kennedy Onassis", 
                "answer_id": "m.0h6mq", 
                "aliases": [
                    "Jacqueline Lee Bouvier Kennedy Onassis", 
                    "First lady Jacqueline Kennedy Onassis", 
                    "Jacqueline Lee \"Jackie\" Bouvier Kennedy Onassis", 
                    "Jackie O", 
                    "Jacqueline Bouvier", 
                    "Supertanker", 
                    "Jacqueline Lee Bouvier Onassis", 
                    "Jackie Bouvier Kennedy Onassis", 
                    "Jacqueline Onassis", 
                    "Mrs. John F. Kennedy", 
                    "Lace", 
                    "Jackie Bouvier", 
                    "Jacqueline Lee Bouvier", 
                    "Jackie Kennedy", 
                    "Jackie Onassis", 
                    "Jacqueline Kennedy"
                ]
            }
        ], 
        "created": "2018-02-13T00:54:31"
    }, 
    {
        "ID": "WebQTrn-1172_2ae1154480b142f4bd9a98e002041566", 
        "webqsp_ID": "WebQTrn-1172", 
        "webqsp_question": "where is university of alabama located", 
        "machine_question": "where is university of alabama located and is the us state that has a capital named Montgomery", 
        "question": "Which US state holds the University of Alabama and has a capital of Montgomery?", 
        "sparql": "PREFIX ns: <http://rdf.freebase.com/ns/>\nSELECT DISTINCT ?x\nWHERE {\nFILTER (?x != ns:m.01wdl3)\nFILTER (!isLiteral(?x) OR lang(?x) = '' OR langMatches(lang(?x), 'en'))\nns:m.01wdl3 ns:location.location.containedby ?x .\n?x ns:location.us_state.capital ns:m.0fttg . \n}", 
        "compositionality_type": "conjunction", 
        "answers": [
            {
                "answer": "Alabama", 
                "answer_id": "m.0gyh", 
                "aliases": [
                    "Cotton State", 
                    "AL", 
                    "Ala"
                ]
            }
        ], 
        "created": "2018-02-12T21:50:22"
    }, 
    {
        "ID": "WebQTest-1833_de764c65ac3c6a870a407dd9cafd0dc9", 
        "webqsp_ID": "WebQTest-1833", 
        "webqsp_question": "what kind of government does brazil has", 
        "machine_question": "what kind of government does the currency used in the country is Brazilian real has", 
        "question": "What form of government is used in the country that uses Brazilian real as its currency?", 
        "sparql": "PREFIX ns: <http://rdf.freebase.com/ns/>\nSELECT DISTINCT ?x\nWHERE {\nFILTER (?x != ?c)\nFILTER (!isLiteral(?x) OR lang(?x) = '' OR langMatches(lang(?x), 'en'))\n?c ns:location.country.currency_used ns:m.03385m . \n?c ns:location.country.form_of_government ?x .\n}\n", 
        "compositionality_type": "composition", 
        "answers": [
            {
                "answer": "Presidential system", 
                "answer_id": "m.01d9r3", 
                "aliases": [
                    "Presidential"
                ]
            }, 
            {
                "answer": "Constitutional republic", 
                "answer_id": "m.0c9rw5", 
                "aliases": [
                    "Constitutional"
                ]
            }, 
            {
                "answer": "Federal republic", 
                "answer_id": "m.0j729", 
                "aliases": [
                    "Federal"
                ]
            }
        ], 
        "created": "2018-02-13T06:08:09"
    }, 
    {
        "ID": "WebQTrn-3481_c78405f6f2157645f1098f8a871f1bc2", 
        "webqsp_ID": "WebQTrn-3481", 
        "webqsp_question": "what types of government does france have", 
        "machine_question": "what types of government does the location that appointed Louis-Eug\u00c3\u00a8ne Cavaignac to govermental position have", 
        "question": "Which type of government does the location that appointed, Louis-Eug\u00c3\u00a8ne Cavaignac to a govermental position currently have?", 
        "sparql": "PREFIX ns: <http://rdf.freebase.com/ns/>\nSELECT DISTINCT ?x\nWHERE {\nFILTER (?x != ?c)\nFILTER (!isLiteral(?x) OR lang(?x) = '' OR langMatches(lang(?x), 'en'))\n?c ns:government.governmental_jurisdiction.governing_officials ?k .\n?k ns:government.government_position_held.appointed_by ns:m.01dsxn . \n?c ns:location.country.form_of_government ?x .\n}\n", 
        "compositionality_type": "composition", 
        "answers": [
            {
                "answer": "Semi-presidential system", 
                "answer_id": "m.01dw03", 
                "aliases": [
                    "Semi-presidential"
                ]
            }, 
            {
                "answer": "Unitary state", 
                "answer_id": "m.01fpfn", 
                "aliases": [
                    "Unitary republic", 
                    "Unitary"
                ]
            }, 
            {
                "answer": "Constitutional republic", 
                "answer_id": "m.0c9rw5", 
                "aliases": [
                    "Constitutional"
                ]
            }
        ], 
        "created": "2018-02-13T02:02:09"
    }, 
    {
        "ID": "WebQTest-1395_38fbb324ca744023a32f419ee9f30a32", 
        "webqsp_ID": "WebQTest-1395", 
        "webqsp_question": "what other countries does south africa share borders with", 
        "machine_question": "what other countries does the location that appointed Jacob Zuma to govermental position share borders with", 
        "question": "Which countries share a border with where Jacob Zuma is in a government position?", 
        "sparql": "PREFIX ns: <http://rdf.freebase.com/ns/>\nSELECT DISTINCT ?x\nWHERE {\nFILTER (?x != ?c)\nFILTER (!isLiteral(?x) OR lang(?x) = '' OR langMatches(lang(?x), 'en'))\n?c ns:government.governmental_jurisdiction.governing_officials ?k .\n?k ns:government.government_position_held.appointed_by ns:m.0466k4 . \n?c ns:location.location.adjoin_s ?y .\n?y ns:location.adjoining_relationship.adjoins ?x .\n}\n", 
        "compositionality_type": "composition", 
        "answers": [
            {
                "answer": "Botswana", 
                "answer_id": "m.0166v", 
                "aliases": []
            }, 
            {
                "answer": "Lesotho", 
                "answer_id": "m.04hvw", 
                "aliases": []
            }, 
            {
                "answer": "Mozambique", 
                "answer_id": "m.04wlh", 
                "aliases": [
                    "Republica de Mocambique", 
                    "Republic of Mozambique", 
                    "Mocambique"
                ]
            }, 
            {
                "answer": "Namibia", 
                "answer_id": "m.05bmq", 
                "aliases": []
            }, 
            {
                "answer": "Swaziland", 
                "answer_id": "m.06v36", 
                "aliases": []
            }, 
            {
                "answer": "Zimbabwe", 
                "answer_id": "m.088q4", 
                "aliases": [
                    "The Republic of Zimbabwe"
                ]
            }
        ], 
        "created": "2018-02-13T05:16:45"
    }, 
    {
        "ID": "WebQTrn-1405_42588c6fd3d30a777953bbaf2b4079b9", 
        "webqsp_ID": "WebQTrn-1405", 
        "webqsp_question": "where did president kennedy go to school", 
        "machine_question": "where did president the person education institution is Edward Devotion School go to school", 
        "question": "What schools did the President who attended Edward Devotion School attend?", 
        "sparql": "PREFIX ns: <http://rdf.freebase.com/ns/>\nSELECT DISTINCT ?x\nWHERE {\nFILTER (?x != ?c)\nFILTER (!isLiteral(?x) OR lang(?x) = '' OR langMatches(lang(?x), 'en'))\n?c ns:people.person.education ?k .\n?k ns:education.education.institution ns:m.0ccg42 . \n?c ns:people.person.education ?y .\n?y ns:education.education.institution ?x .\n}\n", 
        "compositionality_type": "composition", 
        "answers": [
            {
                "answer": "Harvard College", 
                "answer_id": "m.01mpwj", 
                "aliases": [
                    "Harvard", 
                    "Harvard College, main campus", 
                    "Harvard College, Cambridge"
                ]
            }, 
            {
                "answer": "Stanford Graduate School of Business", 
                "answer_id": "m.02bb47", 
                "aliases": [
                    "Stanford Graduate School of Business, main campus", 
                    "Stanford Business School", 
                    "Stanford GSB"
                ]
            }, 
            {
                "answer": "Choate Rosemary Hall", 
                "answer_id": "m.02hdpx", 
                "aliases": [
                    "Choate"
                ]
            }, 
            {
                "answer": "Harvard University", 
                "answer_id": "m.03ksy", 
                "aliases": [
                    "Harvard University, main campus", 
                    "Harvard", 
                    "Harvard University, Cambridge"
                ]
            }, 
            {
                "answer": "Noble and Greenough School", 
                "answer_id": "m.03qs17", 
                "aliases": [
                    "Noble and Greenough"
                ]
            }, 
            {
                "answer": "Canterbury School", 
                "answer_id": "m.05yk0g", 
                "aliases": [
                    "Canterbury"
                ]
            }, 
            {
                "answer": "Princeton University", 
                "answer_id": "m.05zl0", 
                "aliases": [
                    "Princeton University, Borough of Princeton", 
                    "Princeton University, main campus", 
                    "Princeton"
                ]
            }, 
            {
                "answer": "Riverdale Country School", 
                "answer_id": "m.08kml_", 
                "aliases": [
                    "Riverdale Country"
                ]
            }, 
            {
                "answer": "Dexter School", 
                "answer_id": "m.0b7824", 
                "aliases": [
                    "Dexter"
                ]
            }, 
            {
                "answer": "Edward Devotion School", 
                "answer_id": "m.0ccg42", 
                "aliases": [
                    "Edward Devotion"
                ]
            }
        ], 
        "created": "2018-02-12T22:14:23"
    }, 
    {
        "ID": "WebQTrn-3466_42588c6fd3d30a777953bbaf2b4079b9", 
        "webqsp_ID": "WebQTrn-3466", 
        "webqsp_question": "in which city was president kennedy killed", 
        "machine_question": "in which city was president the person education institution is Edward Devotion School killed", 
        "question": "Which city was the President who went to Edward Devotional School killed in?", 
        "sparql": "PREFIX ns: <http://rdf.freebase.com/ns/>\nSELECT DISTINCT ?x\nWHERE {\nFILTER (?x != ?c)\nFILTER (!isLiteral(?x) OR lang(?x) = '' OR langMatches(lang(?x), 'en'))\n?c ns:people.person.education ?k .\n?k ns:education.education.institution ns:m.0ccg42 . \n?c ns:people.deceased_person.place_of_death ?x .\n?x ns:common.topic.notable_types ns:m.01m9 .\n}\n", 
        "compositionality_type": "composition", 
        "answers": [
            {
                "answer": "Dallas", 
                "answer_id": "m.0f2rq", 
                "aliases": [
                    "Dallas, Texas", 
                    "Dallas, TX", 
                    "Rockwall County / Dallas city"
                ]
            }
        ], 
        "created": "2018-02-13T02:00:36"
    }, 
    {
        "ID": "WebQTrn-2403_32d160cae7125bde67b4511f4be65b3d", 
        "webqsp_ID": "WebQTrn-2403", 
        "webqsp_question": "what is the buddhist holy book", 
        "machine_question": "what is the the religion text is P\u00c4\u0081li Canon holy book", 
        "question": "What other sacred texts are used in the religion that venerates the P\u00c4\u0081li Canon as a holy book?", 
        "sparql": "PREFIX ns: <http://rdf.freebase.com/ns/>\nSELECT DISTINCT ?x\nWHERE {\nFILTER (?x != ?c)\nFILTER (!isLiteral(?x) OR lang(?x) = '' OR langMatches(lang(?x), 'en'))\n?c ns:religion.religion.texts ns:m.01hnwm . \n?c ns:religion.religion.texts ?x .\n}\n", 
        "compositionality_type": "composition", 
        "answers": [
            {
                "answer": "P\u0101li Canon", 
                "answer_id": "m.01hnwm", 
                "aliases": [
                    "Tipitaka"
                ]
            }, 
            {
                "answer": "Dhammapada", 
                "answer_id": "m.01nv3q", 
                "aliases": []
            }, 
            {
                "answer": "Mah\u0101y\u0101na s\u016btras", 
                "answer_id": "m.01r1g7", 
                "aliases": []
            }, 
            {
                "answer": "Vimalakirti Sutra", 
                "answer_id": "m.01rky9", 
                "aliases": []
            }, 
            {
                "answer": "Tibetan Buddhist canon", 
                "answer_id": "m.02k1bj", 
                "aliases": []
            }, 
            {
                "answer": "Chinese Buddhist canon", 
                "answer_id": "m.02l3dj", 
                "aliases": []
            }, 
            {
                "answer": "\u015ar\u012bm\u0101l\u0101dev\u012b Si\u1e43han\u0101da S\u016btra", 
                "answer_id": "m.036z9c", 
                "aliases": []
            }, 
            {
                "answer": "Mah\u0101vastu", 
                "answer_id": "m.04_13vt", 
                "aliases": []
            }, 
            {
                "answer": "Amitabha Sutra", 
                "answer_id": "m.04k1b0", 
                "aliases": []
            }, 
            {
                "answer": "\u0100gama", 
                "answer_id": "m.05_m24", 
                "aliases": []
            }, 
            {
                "answer": "Gang\u014dji Garan Engi", 
                "answer_id": "m.05mwk22", 
                "aliases": []
            }, 
            {
                "answer": "U\u1e63\u1e47\u012b\u1e63a Vijaya Dh\u0101ra\u1e47\u012b S\u016btra", 
                "answer_id": "m.0c00_gk", 
                "aliases": [
                    "U\u1e63\u1e47\u012b\u1e63a Vijaya Dh\u0101ra\u1e47\u012b"
                ]
            }, 
            {
                "answer": "Longchen Nyingthig", 
                "answer_id": "m.0c4pcl", 
                "aliases": [
                    "Longchen Nyingtig"
                ]
            }, 
            {
                "answer": "N\u012blaka\u1e47\u1e6dha Dh\u0101ra\u1e47\u012b", 
                "answer_id": "m.0fs6g7", 
                "aliases": [
                    "D\u00e0b\u0113i Zh\u00f2u", 
                    "Mah\u0101 Karu\u1e47\u0101 Dh\u0101ran\u012b", 
                    "Great Compassion Mantra"
                ]
            }
        ], 
        "created": "2018-02-12T23:52:43"
    }, 
    {
        "ID": "WebQTest-1072_4fa3b53f1047599414336495b9275a38", 
        "webqsp_ID": "WebQTest-1072", 
        "webqsp_question": "who is the current governor of arizona 2010", 
        "machine_question": "who is the current governor of the location that appointed Jan Brewer to govermental position 2010", 
        "question": "Who was the 2010 governor of the state that appointed Jan Brewer?", 
        "sparql": "PREFIX ns: <http://rdf.freebase.com/ns/>\nSELECT DISTINCT ?x\nWHERE {\nFILTER (?x != ?c)\nFILTER (!isLiteral(?x) OR lang(?x) = '' OR langMatches(lang(?x), 'en'))\n?c ns:government.governmental_jurisdiction.governing_officials ?k .\n?k ns:government.government_position_held.appointed_by ns:m.02pkb1c . \n?c ns:government.governmental_jurisdiction.governing_officials ?y .\n?y ns:government.government_position_held.office_holder ?x .\n?y ns:government.government_position_held.basic_title ns:m.0fkvn .\nFILTER(NOT EXISTS {?y ns:government.government_position_held.from ?sk0} || \nEXISTS {?y ns:government.government_position_held.from ?sk1 . \nFILTER(xsd:datetime(?sk1) <= \"2010-12-31\"^^xsd:dateTime) })\nFILTER(NOT EXISTS {?y ns:government.government_position_held.to ?sk2} || \nEXISTS {?y ns:government.government_position_held.to ?sk3 . \nFILTER(xsd:datetime(?sk3) >= \"2010-01-01\"^^xsd:dateTime) })\n}\n", 
        "compositionality_type": "composition", 
        "answers": [
            {
                "answer": "Jan Brewer", 
                "answer_id": "m.02pkb1c", 
                "aliases": [
                    "Janice Kay Brewer", 
                    "Janice Kay Drinkwine"
                ]
            }
        ], 
        "created": "2018-02-13T04:37:05"
    }, 
    {
        "ID": "WebQTrn-1782_2b81e26c8a1854e277201f9a52aa5704", 
        "webqsp_ID": "WebQTrn-1782", 
        "webqsp_question": "with which country does south africa border", 
        "machine_question": "with which country does south africa border and the country capital is Lobamba", 
        "question": "What country bordering South African that has the capital of Lobamba?", 
        "sparql": "PREFIX ns: <http://rdf.freebase.com/ns/>\nSELECT DISTINCT ?x\nWHERE {\nFILTER (?x != ns:m.0hzlz)\nFILTER (!isLiteral(?x) OR lang(?x) = '' OR langMatches(lang(?x), 'en'))\nns:m.0hzlz ns:location.location.adjoin_s ?y .\n?y ns:location.adjoining_relationship.adjoins ?x .\n?x ns:common.topic.notable_types ns:m.01mp .\n?x ns:location.country.capital ns:m.07272n . \n}", 
        "compositionality_type": "conjunction", 
        "answers": [
            {
                "answer": "Swaziland", 
                "answer_id": "m.06v36", 
                "aliases": []
            }
        ], 
        "created": "2018-02-12T22:49:57"
    }, 
    {
        "ID": "WebQTest-2015_2ed287b0ef57067bd3a79f71c2fa849e", 
        "webqsp_ID": "WebQTest-2015", 
        "webqsp_question": "what type of government does argentina have today", 
        "machine_question": "what type of government does the country that has the national anthem Argentine National Anthem have today", 
        "question": "The country with the National Anthem Argentine National Anthem has what type of government?", 
        "sparql": "PREFIX ns: <http://rdf.freebase.com/ns/>\nSELECT DISTINCT ?x\nWHERE {\nFILTER (?x != ?c)\nFILTER (!isLiteral(?x) OR lang(?x) = '' OR langMatches(lang(?x), 'en'))\n?c ns:location.country.national_anthem ?k .\n?k ns:government.national_anthem_of_a_country.anthem ns:m.01dlgn . \n?c ns:location.country.form_of_government ?x .\n}\n", 
        "compositionality_type": "composition", 
        "answers": [
            {
                "answer": "Presidential system", 
                "answer_id": "m.01d9r3", 
                "aliases": [
                    "Presidential"
                ]
            }, 
            {
                "answer": "Constitutional republic", 
                "answer_id": "m.0c9rw5", 
                "aliases": [
                    "Constitutional"
                ]
            }, 
            {
                "answer": "Representative democracy", 
                "answer_id": "m.0drnm", 
                "aliases": []
            }, 
            {
                "answer": "Federal republic", 
                "answer_id": "m.0j729", 
                "aliases": [
                    "Federal"
                ]
            }
        ], 
        "created": "2018-02-13T06:29:42"
    }, 
    {
        "ID": "WebQTest-1746_69740420b265705dfa9565526a48c467", 
        "webqsp_ID": "WebQTest-1746", 
        "webqsp_question": "where is burundi country", 
        "machine_question": "where is the country that has the national anthem Burundi Bwacu country", 
        "question": "The national anthem Burundi Bwacu is from what country?", 
        "sparql": "PREFIX ns: <http://rdf.freebase.com/ns/>\nSELECT DISTINCT ?x\nWHERE {\nFILTER (?x != ?c)\nFILTER (!isLiteral(?x) OR lang(?x) = '' OR langMatches(lang(?x), 'en'))\n?c ns:location.country.national_anthem ?k .\n?k ns:government.national_anthem_of_a_country.anthem ns:m.01l8dc . \n?c ns:base.locations.countries.continent ?x .\n}\n", 
        "compositionality_type": "composition", 
        "answers": [
            {
                "answer": "Africa", 
                "answer_id": "m.0dg3n1", 
                "aliases": [
                    "Afrique"
                ]
            }
        ], 
        "created": "2018-02-13T05:53:33"
    }, 
    {
        "ID": "WebQTrn-1210_6de14d8ae5edc21282b7c4c1df7d9232", 
        "webqsp_ID": "WebQTrn-1210", 
        "webqsp_question": "where is south carolina located", 
        "machine_question": "where is the us state that has a capital named Columbia located", 
        "question": "Where is the state whose capital is Columbia located?", 
        "sparql": "PREFIX ns: <http://rdf.freebase.com/ns/>\nSELECT DISTINCT ?x\nWHERE {\nFILTER (?x != ?c)\nFILTER (!isLiteral(?x) OR lang(?x) = '' OR langMatches(lang(?x), 'en'))\n?c ns:location.us_state.capital ns:m.0fv_t . \n?c ns:base.aareas.schema.administrative_area.administrative_parent ?x .\n}\n", 
        "compositionality_type": "composition", 
        "answers": [
            {
                "answer": "United States of America", 
                "answer_id": "m.09c7w0", 
                "aliases": [
                    "U.S. of A.", 
                    "Estats Units d'Am\u00e8rica", 
                    "USA", 
                    "U.S.A.", 
                    "U.S.", 
                    "The States", 
                    "US", 
                    "United States", 
                    "America"
                ]
            }
        ], 
        "created": "2018-02-12T21:53:58"
    }, 
    {
        "ID": "WebQTrn-1535_857ddd4efe6908c43e51f637d780eefb", 
        "webqsp_ID": "WebQTrn-1535", 
        "webqsp_question": "what religion in thailand", 
        "machine_question": "what religion in thailand and is the religion types of places of worship include Wat", 
        "question": "What religion has a place of worship named Wat in Thailand?", 
        "sparql": "PREFIX ns: <http://rdf.freebase.com/ns/>\nSELECT DISTINCT ?x\nWHERE {\nFILTER (?x != ns:m.07f1x)\nFILTER (!isLiteral(?x) OR lang(?x) = '' OR langMatches(lang(?x), 'en'))\nns:m.07f1x ns:location.statistical_region.religions ?y .\n?y ns:location.religion_percentage.religion ?x .\n?x ns:religion.religion.types_of_places_of_worship ns:m.02jd5z . \n}", 
        "compositionality_type": "conjunction", 
        "answers": [
            {
                "answer": "Buddhism", 
                "answer_id": "m.092bf5", 
                "aliases": [
                    "Buddhist"
                ]
            }
        ], 
        "created": "2018-02-12T22:28:50"
    }, 
    {
        "ID": "WebQTest-654_af0a37b13a66138a543af50c2ac24bb8", 
        "webqsp_ID": "WebQTest-654", 
        "webqsp_question": "what are egyptian money called", 
        "machine_question": "what are the location that appointed Adly Mansour to govermental position money called", 
        "question": "What is the money called in the area where Adly Monsour is in a governmental position?", 
        "sparql": "PREFIX ns: <http://rdf.freebase.com/ns/>\nSELECT DISTINCT ?x\nWHERE {\nFILTER (?x != ?c)\nFILTER (!isLiteral(?x) OR lang(?x) = '' OR langMatches(lang(?x), 'en'))\n?c ns:government.governmental_jurisdiction.governing_officials ?k .\n?k ns:government.government_position_held.appointed_by ns:m.0w5nf92 . \n?c ns:location.country.currency_used ?x .\n}\n", 
        "compositionality_type": "composition", 
        "answers": [
            {
                "answer": "Egyptian pound", 
                "answer_id": "m.04phzg", 
                "aliases": []
            }
        ], 
        "created": "2018-02-13T03:55:42"
    }, 
    {
        "ID": "WebQTrn-2511_1e7110e48c30a2cef3caf291e3b8d394", 
        "webqsp_ID": "WebQTrn-2511", 
        "webqsp_question": "what is language in argentina", 
        "machine_question": "what is language in the country that contains Buenos Aires", 
        "question": "In the country with Buenos Aires in it, what languages are spoken?", 
        "sparql": "PREFIX ns: <http://rdf.freebase.com/ns/>\nSELECT DISTINCT ?x\nWHERE {\nFILTER (?x != ?c)\nFILTER (!isLiteral(?x) OR lang(?x) = '' OR langMatches(lang(?x), 'en'))\n?c ns:location.country.administrative_divisions ns:m.01ly5m . \n?c ns:location.country.languages_spoken ?x .\n}\n", 
        "compositionality_type": "composition", 
        "answers": [
            {
                "answer": "Italian Language", 
                "answer_id": "m.02bjrlw", 
                "aliases": [
                    "Italiano", 
                    "Italian"
                ]
            }, 
            {
                "answer": "Guaran\u00ed language", 
                "answer_id": "m.02w_hsv", 
                "aliases": [
                    "Guaran\u00ed"
                ]
            }, 
            {
                "answer": "Quechuan languages", 
                "answer_id": "m.03d9kg", 
                "aliases": [
                    "Runasimi", 
                    "Quechua language", 
                    "Quechua, Ayacucho Language", 
                    "Quechua", 
                    "Quechua languages", 
                    "Chanka"
                ]
            }, 
            {
                "answer": "Spanish Language", 
                "answer_id": "m.06nm1", 
                "aliases": [
                    "Espa\u00f1ol", 
                    "Spanish language", 
                    "Castillian", 
                    "Spanish", 
                    "The language of Cervantes", 
                    "Castellano", 
                    "Castillan", 
                    "Castilian"
                ]
            }, 
            {
                "answer": "Yiddish Language", 
                "answer_id": "m.0880p", 
                "aliases": [
                    "Yiddish"
                ]
            }
        ], 
        "created": "2018-02-13T00:04:03"
    }, 
    {
        "ID": "WebQTrn-3271_c4cb89dfae8793bedbe134ad40d07af9", 
        "webqsp_ID": "WebQTrn-3271", 
        "webqsp_question": "what does chilean people speak", 
        "machine_question": "what does the currency used in the country is Chilean peso people speak", 
        "question": "People from the country with the Chilean Peso currency speak what language?", 
        "sparql": "PREFIX ns: <http://rdf.freebase.com/ns/>\nSELECT DISTINCT ?x\nWHERE {\nFILTER (?x != ?c)\nFILTER (!isLiteral(?x) OR lang(?x) = '' OR langMatches(lang(?x), 'en'))\n?c ns:location.country.currency_used ns:m.0172zs . \n?c ns:location.country.languages_spoken ?x .\n}\n", 
        "compositionality_type": "composition", 
        "answers": [
            {
                "answer": "Aymara language", 
                "answer_id": "m.01y5tq", 
                "aliases": [
                    "Aymara"
                ]
            }, 
            {
                "answer": "Mapudungun Language", 
                "answer_id": "m.01zn1j", 
                "aliases": [
                    "Mapuche", 
                    "Mapudungu", 
                    "Mapudungun", 
                    "Araucano", 
                    "Maputongo"
                ]
            }, 
            {
                "answer": "Rapa Nui Language", 
                "answer_id": "m.0565hv", 
                "aliases": [
                    "Easter Island", 
                    "Pascuense", 
                    "Rapa Nui"
                ]
            }, 
            {
                "answer": "Spanish Language", 
                "answer_id": "m.06nm1", 
                "aliases": [
                    "Espa\u00f1ol", 
                    "Spanish language", 
                    "Castillian", 
                    "Spanish", 
                    "The language of Cervantes", 
                    "Castellano", 
                    "Castillan", 
                    "Castilian"
                ]
            }, 
            {
                "answer": "Puquina Language", 
                "answer_id": "m.09_sxt", 
                "aliases": [
                    "Puquina"
                ]
            }
        ], 
        "created": "2018-02-13T01:33:22"
    }, 
    {
        "ID": "WebQTrn-3082_6cbfa4f30d42b28bda56f8a5399c245e", 
        "webqsp_ID": "WebQTrn-3082", 
        "webqsp_question": "what all countries are in south america", 
        "machine_question": "what all countries are in south america and is the country that contains Federal District", 
        "question": "What country in South America contains the Federal District?", 
        "sparql": "PREFIX ns: <http://rdf.freebase.com/ns/>\nSELECT DISTINCT ?x\nWHERE {\nFILTER (?x != ns:m.06n3y)\nFILTER (!isLiteral(?x) OR lang(?x) = '' OR langMatches(lang(?x), 'en'))\nns:m.06n3y ns:location.location.contains ?x .\n?x ns:common.topic.notable_types ns:m.01mp .\n?x ns:location.country.administrative_divisions ns:m.012l8y . \n}", 
        "compositionality_type": "conjunction", 
        "answers": [
            {
                "answer": "Brazil", 
                "answer_id": "m.015fr", 
                "aliases": [
                    "Brazilian ", 
                    "Rep\u00fablica Federativa do Brasil", 
                    "Brasil", 
                    "Federative Republic of Brazil"
                ]
            }
        ], 
        "created": "2018-02-13T01:12:18"
    }, 
    {
        "ID": "WebQTest-302_5e43a21c08076aabc07f1a6fd6ae6bb9", 
        "webqsp_ID": "WebQTest-302", 
        "webqsp_question": "what are the official colors of the dallas cowboys", 
        "machine_question": "what are the official colors of the the sports team owner is Jerry Jones", 
        "question": "Which colors are the official ones of the athletic team that is owned by Jerry Jones?", 
        "sparql": "PREFIX ns: <http://rdf.freebase.com/ns/>\nSELECT DISTINCT ?x\nWHERE {\nFILTER (?x != ?c)\nFILTER (!isLiteral(?x) OR lang(?x) = '' OR langMatches(lang(?x), 'en'))\n?c ns:sports.professional_sports_team.owner_s ns:m.016b9c . \n?c ns:sports.sports_team.colors ?x .\n}\n", 
        "compositionality_type": "composition", 
        "answers": [
            {
                "answer": "Blue", 
                "answer_id": "m.01g5v", 
                "aliases": [
                    "Azul"
                ]
            }, 
            {
                "answer": "Navy Blue", 
                "answer_id": "m.02rnmb", 
                "aliases": []
            }, 
            {
                "answer": "Silver", 
                "answer_id": "m.03vtbc", 
                "aliases": []
            }, 
            {
                "answer": "Royal blue", 
                "answer_id": "m.06kqt3", 
                "aliases": []
            }, 
            {
                "answer": "White", 
                "answer_id": "m.083jv", 
                "aliases": []
            }
        ], 
        "created": "2018-02-13T03:12:54"
    }, 
    {
        "ID": "WebQTrn-1172_ae99aa9db8458c1c25b58266fa61faf0", 
        "webqsp_ID": "WebQTrn-1172", 
        "webqsp_question": "where is university of alabama located", 
        "machine_question": "where is university of alabama located and is the location that appointed Robert J. Bentley to govermental position", 
        "question": "What location that appointed Robert J. Bentley to governmental position is the location of the University of Alabama?", 
        "sparql": "PREFIX ns: <http://rdf.freebase.com/ns/>\nSELECT DISTINCT ?x\nWHERE {\nFILTER (?x != ns:m.01wdl3)\nFILTER (!isLiteral(?x) OR lang(?x) = '' OR langMatches(lang(?x), 'en'))\nns:m.01wdl3 ns:location.location.containedby ?x .\n?x ns:government.governmental_jurisdiction.governing_officials ?c .\n?c ns:government.government_position_held.appointed_by ns:m.080fp__ . \n}", 
        "compositionality_type": "conjunction", 
        "answers": [
            {
                "answer": "Alabama", 
                "answer_id": "m.0gyh", 
                "aliases": [
                    "Cotton State", 
                    "AL", 
                    "Ala"
                ]
            }
        ], 
        "created": "2018-02-12T21:50:22"
    }, 
    {
        "ID": "WebQTrn-959_c4a4d1b444e9f0b28e960a3c1f7717ac", 
        "webqsp_ID": "WebQTrn-959", 
        "webqsp_question": "who is the current leader of china today", 
        "machine_question": "who is the current leader of the location that appointed National People's Congress to govermental position today", 
        "question": "The location that appointed National People's Congress to govermental position today has what leader?", 
        "sparql": "PREFIX ns: <http://rdf.freebase.com/ns/>\nSELECT DISTINCT ?x\nWHERE {\nFILTER (?x != ?c)\nFILTER (!isLiteral(?x) OR lang(?x) = '' OR langMatches(lang(?x), 'en'))\n?c ns:government.governmental_jurisdiction.governing_officials ?k .\n?k ns:government.government_position_held.appointed_by ns:m.0c3xm . \n?c ns:government.governmental_jurisdiction.governing_officials ?y .\n?y ns:government.government_position_held.office_holder ?x .\n?y ns:government.government_position_held.basic_title ns:m.060c4 .\nFILTER(NOT EXISTS {?y ns:government.government_position_held.from ?sk0} || \nEXISTS {?y ns:government.government_position_held.from ?sk1 . \nFILTER(xsd:datetime(?sk1) <= \"2015-08-10\"^^xsd:dateTime) })\nFILTER(NOT EXISTS {?y ns:government.government_position_held.to ?sk2} || \nEXISTS {?y ns:government.government_position_held.to ?sk3 . \nFILTER(xsd:datetime(?sk3) >= \"2015-08-10\"^^xsd:dateTime) })\n}\n", 
        "compositionality_type": "composition", 
        "answers": [
            {
                "answer": "Xi Jinping", 
                "answer_id": "m.06ff60", 
                "aliases": []
            }
        ], 
        "created": "2018-02-12T21:27:29"
    }, 
    {
        "ID": "WebQTest-972_62ece2332e7a2ac99e05ce197d9b1145", 
        "webqsp_ID": "WebQTest-972", 
        "webqsp_question": "what team did jackie robinson", 
        "machine_question": "what team did jackie robinson and is the sports team with the fight song Mighty Bruins", 
        "question": "What sports team with the fight song Mighty Bruins did Jackie Robinson play for?", 
        "sparql": "PREFIX ns: <http://rdf.freebase.com/ns/>\nSELECT DISTINCT ?x\nWHERE {\nFILTER (?x != ns:m.0443c)\nFILTER (!isLiteral(?x) OR lang(?x) = '' OR langMatches(lang(?x), 'en'))\nns:m.0443c ns:sports.pro_athlete.teams ?y .\n?y ns:sports.sports_team_roster.team ?x .\n?x ns:sports.sports_team.fight_song ns:m.06vrfs . \n}", 
        "compositionality_type": "conjunction", 
        "answers": [
            {
                "answer": "UCLA Bruins football", 
                "answer_id": "m.0fbtm7", 
                "aliases": [
                    "University of California, Los Angeles Football", 
                    "UCLA Football", 
                    "University of California, Los Angeles Men's Football", 
                    "University of California, Los Angeles Bruins Football", 
                    "UCLA Men's Football", 
                    "University of California Los Angeles Bruins Mens Football", 
                    "University of California, Los Angeles Bruins Mens Football", 
                    "University of California Los Angeles Bruins Men's Football", 
                    "UCLA Bruins Mens Football", 
                    "University of California Los Angeles Bruins Football", 
                    "University of California, Los Angeles Mens Football", 
                    "UCLA Bruins Football", 
                    "University of California, Los Angeles Bruins Men's Football", 
                    "UCLA Mens Football", 
                    "UCLA Bruins Men's Football"
                ]
            }
        ], 
        "created": "2018-02-13T04:29:27"
    }, 
    {
        "ID": "WebQTrn-2435_6aa17478b08b4331903a0d6d5f476f02", 
        "webqsp_ID": "WebQTrn-2435", 
        "webqsp_question": "what does george soros believe", 
        "machine_question": "what does george soros believe and the religion organiztion is Sanhedrin", 
        "question": "What religion with religious organization named Sanhedrin does George Soros believe in?", 
        "sparql": "PREFIX ns: <http://rdf.freebase.com/ns/>\nSELECT DISTINCT ?x\nWHERE {\nFILTER (?x != ns:m.0gyk6w)\nFILTER (!isLiteral(?x) OR lang(?x) = '' OR langMatches(lang(?x), 'en'))\nns:m.0gyk6w ns:people.person.religion ?x .\n?x ns:religion.religion.organizations ns:m.0160sc . \n}", 
        "compositionality_type": "conjunction", 
        "answers": [
            {
                "answer": "Judaism", 
                "answer_id": "m.03_gx", 
                "aliases": [
                    "Jewish"
                ]
            }
        ], 
        "created": "2018-02-12T23:56:33"
    }, 
    {
        "ID": "WebQTest-1582_e77af105a3bb701af890fdae63c23cac", 
        "webqsp_ID": "WebQTest-1582", 
        "webqsp_question": "what time in china hong kong", 
        "machine_question": "what time in china the location that appointed George Bowen to govermental position", 
        "question": "Which time zone in china, at the location, that appointed George Bowen to a governmental position?", 
        "sparql": "PREFIX ns: <http://rdf.freebase.com/ns/>\nSELECT DISTINCT ?x\nWHERE {\nFILTER (?x != ?c)\nFILTER (!isLiteral(?x) OR lang(?x) = '' OR langMatches(lang(?x), 'en'))\n?c ns:government.governmental_jurisdiction.governing_officials ?k .\n?k ns:government.government_position_held.appointed_by ns:m.01w5n_ . \n?c ns:location.location.time_zones ?x .\n}\n", 
        "compositionality_type": "composition", 
        "answers": [
            {
                "answer": "Hong Kong Time Zone", 
                "answer_id": "m.04qqww", 
                "aliases": [
                    "Hong Kong Time"
                ]
            }
        ], 
        "created": "2018-02-13T05:37:40"
    }, 
    {
        "ID": "WebQTest-1803_31e25dd0a2a9bdd85f454618645c65f0", 
        "webqsp_ID": "WebQTest-1803", 
        "webqsp_question": "what does gm make", 
        "machine_question": "what does the child organization is GMETR Trade Receivables LLC make", 
        "question": "What does GMETR Trade Receivables LLC's child company make?", 
        "sparql": "PREFIX ns: <http://rdf.freebase.com/ns/>\nSELECT DISTINCT ?x\nWHERE {\nFILTER (?x != ?c)\nFILTER (!isLiteral(?x) OR lang(?x) = '' OR langMatches(lang(?x), 'en'))\n?c ns:organization.organization.child ?k .\n?k ns:organization.organization_relationship.child ns:m.09mw1_1 . \n?c ns:business.business_operation.industry ?x .\n}\n", 
        "compositionality_type": "composition", 
        "answers": [
            {
                "answer": "Automotive industry", 
                "answer_id": "m.015smg", 
                "aliases": [
                    "Automobile", 
                    "Automaker"
                ]
            }, 
            {
                "answer": "Motor Vehicles and Passenger Car Bodies", 
                "answer_id": "m.03qtfw8", 
                "aliases": []
            }
        ], 
        "created": "2018-02-13T06:01:24"
    }, 
    {
        "ID": "WebQTest-1575_a39a0176c3329ab6f68b84885d8fbdde", 
        "webqsp_ID": "WebQTest-1575", 
        "webqsp_question": "what products and\\/or services does google offer customers", 
        "machine_question": "what products and\\/or services does the education institution has a grad student named Shawn Harding offer customers", 
        "question": "What products and/or services are offered by the educational institution where there's a grad student named Shawn Harding?", 
        "sparql": "PREFIX ns: <http://rdf.freebase.com/ns/>\nSELECT DISTINCT ?x\nWHERE {\nFILTER (?x != ?c)\nFILTER (!isLiteral(?x) OR lang(?x) = '' OR langMatches(lang(?x), 'en'))\n?c ns:education.educational_institution.students_graduates ?k .\n?k ns:education.education.student ns:m.0115wcp5 . \n?c ns:business.consumer_company.products ?y .\n?y ns:business.company_product_relationship.consumer_product ?x .\nFILTER(NOT EXISTS {?y ns:business.company_product_relationship.from_date ?sk0} || \nEXISTS {?y ns:business.company_product_relationship.from_date ?sk1 . \nFILTER(xsd:datetime(?sk1) <= \"2015-08-10\"^^xsd:dateTime) })\nFILTER(NOT EXISTS {?y ns:business.company_product_relationship.to_date ?sk2} || \nEXISTS {?y ns:business.company_product_relationship.to_date ?sk3 . \nFILTER(xsd:datetime(?sk3) >= \"2015-08-10\"^^xsd:dateTime) })\n}\n", 
        "compositionality_type": "composition", 
        "answers": [
            {
                "answer": "Google Classroom", 
                "answer_id": "m.010pkp62", 
                "aliases": []
            }, 
            {
                "answer": "Google Drive", 
                "answer_id": "m.03w9g0f", 
                "aliases": [
                    "Google Drive", 
                    "GDrive", 
                    "Drive"
                ]
            }, 
            {
                "answer": "Apache Wave", 
                "answer_id": "m.064qgt0", 
                "aliases": [
                    "Apache Wave", 
                    "Google Wave"
                ]
            }, 
            {
                "answer": "Google Earth", 
                "answer_id": "m.06ny5h", 
                "aliases": []
            }, 
            {
                "answer": "Google Buzz", 
                "answer_id": "m.0b6g2kz", 
                "aliases": []
            }, 
            {
                "answer": "Google Docs, Sheets, and Slides", 
                "answer_id": "m.0dm258", 
                "aliases": [
                    "Docs", 
                    "Google Docs", 
                    "Google Docs and Spreadsheets"
                ]
            }, 
            {
                "answer": "Nexus S", 
                "answer_id": "m.0fpj3tb", 
                "aliases": [
                    "Samsung GT-I9020T"
                ]
            }, 
            {
                "answer": "Google Glass", 
                "answer_id": "m.0j7m2zm", 
                "aliases": []
            }, 
            {
                "answer": "Nexus 7", 
                "answer_id": "m.0k0p036", 
                "aliases": []
            }, 
            {
                "answer": "Nexus Q", 
                "answer_id": "m.0k2998k", 
                "aliases": []
            }, 
            {
                "answer": "Nexus 10", 
                "answer_id": "m.0nb7n8f", 
                "aliases": []
            }, 
            {
                "answer": "Google Maps", 
                "answer_id": "m.0pb8gtr", 
                "aliases": []
            }, 
            {
                "answer": "Chromecast", 
                "answer_id": "m.0wf0rgl", 
                "aliases": []
            }
        ], 
        "created": "2018-02-13T05:36:33"
    }, 
    {
        "ID": "WebQTrn-191_aba5be3cab85b97a0ed99632fda218eb", 
        "webqsp_ID": "WebQTrn-191", 
        "webqsp_question": "what are eu countries", 
        "machine_question": "what are eu countries and the country capital is Bratislava", 
        "question": "What European Union country calls Bratislava its capital city?", 
        "sparql": "PREFIX ns: <http://rdf.freebase.com/ns/>\nSELECT DISTINCT ?x\nWHERE {\nFILTER (?x != ns:m.0_6t_z8)\nFILTER (!isLiteral(?x) OR lang(?x) = '' OR langMatches(lang(?x), 'en'))\nns:m.0_6t_z8 ns:organization.membership_organization.members ?y .\n?y ns:organization.organization_membership.member ?x .\n?x ns:location.country.capital ns:m.015g7 . \n}", 
        "compositionality_type": "conjunction", 
        "answers": [
            {
                "answer": "Slovakia", 
                "answer_id": "m.06npd", 
                "aliases": [
                    "Slovensko", 
                    "The Slovak Republic"
                ]
            }
        ], 
        "created": "2018-02-12T19:58:00"
    }, 
    {
        "ID": "WebQTrn-1178_8c1f2e2b5be1f55380ecce20453ae447", 
        "webqsp_ID": "WebQTrn-1178", 
        "webqsp_question": "what are some places to visit in barcelona", 
        "machine_question": "what are some places to visit in barcelona and is the museum that was established in 2008", 
        "question": "What museum established in 2008 is a place to visit in Barcelona?", 
        "sparql": "PREFIX ns: <http://rdf.freebase.com/ns/>\nSELECT DISTINCT ?x\nWHERE {\nFILTER (?x != ns:m.01f62)\nFILTER (!isLiteral(?x) OR lang(?x) = '' OR langMatches(lang(?x), 'en'))\nns:m.01f62 ns:travel.travel_destination.tourist_attractions ?x .\n?x ns:architecture.museum.established \"2008\"^^xsd:dateTime . \n}", 
        "compositionality_type": "conjunction", 
        "answers": [
            {
                "answer": "Design Museum of Barcelona", 
                "answer_id": "m.0j9nnpr", 
                "aliases": [
                    "Museu del Disseny de Barcelona"
                ]
            }
        ], 
        "created": "2018-02-12T21:50:39"
    }, 
    {
        "ID": "WebQTrn-836_9be8c18e016b713cbb7f7feb6badebc7", 
        "webqsp_ID": "WebQTrn-836", 
        "webqsp_question": "what are the major religions in uk", 
        "machine_question": "what are the major religions in uk and the religion text is The Bible", 
        "question": "What are the major religions in the UK that use The Bible?", 
        "sparql": "PREFIX ns: <http://rdf.freebase.com/ns/>\nSELECT DISTINCT ?x\nWHERE {\nFILTER (?x != ns:m.07ssc)\nFILTER (!isLiteral(?x) OR lang(?x) = '' OR langMatches(lang(?x), 'en'))\nns:m.07ssc ns:location.statistical_region.religions ?y .\n?y ns:location.religion_percentage.religion ?x .\n?x ns:religion.religion.texts ns:m.015j7 . \n}", 
        "compositionality_type": "conjunction", 
        "answers": [
            {
                "answer": "Catholicism", 
                "answer_id": "m.0c8wxp", 
                "aliases": [
                    "Roman Catholic convert", 
                    "Roman Catholic"
                ]
            }
        ], 
        "created": "2018-02-12T21:07:43"
    }, 
    {
        "ID": "WebQTrn-806_ae64704cb347aa76764b4232059b8823", 
        "webqsp_ID": "WebQTrn-806", 
        "webqsp_question": "where are the pyramids of giza located", 
        "machine_question": "where are the pyramids of giza located and is the country that contains Cairo Governorate", 
        "question": "What country that contains Cairo Governorate is where the Pyramids of Giza are located?", 
        "sparql": "PREFIX ns: <http://rdf.freebase.com/ns/>\nSELECT DISTINCT ?x\nWHERE {\nFILTER (?x != ns:m.07s6gb8)\nFILTER (!isLiteral(?x) OR lang(?x) = '' OR langMatches(lang(?x), 'en'))\nns:m.07s6gb8 ns:location.location.containedby ?x .\n?x ns:location.country.administrative_divisions ns:m.023syc . \n}", 
        "compositionality_type": "conjunction", 
        "answers": [
            {
                "answer": "Egypt", 
                "answer_id": "m.02k54", 
                "aliases": [
                    "Arab Republic of Egypt"
                ]
            }
        ], 
        "created": "2018-02-12T21:02:16"
    }, 
    {
        "ID": "WebQTrn-3458_f4a9e5f1e0dcfb82cbadf4771eda7bb5", 
        "webqsp_ID": "WebQTrn-3458", 
        "webqsp_question": "what are the main imports and exports of afghanistan", 
        "machine_question": "what are the main imports and exports of the country that has the national anthem Afghan National Anthem", 
        "question": "What items are imported and exported from the country with national anthem Afghan National Anthem?", 
        "sparql": "PREFIX ns: <http://rdf.freebase.com/ns/>\nSELECT DISTINCT ?x\nWHERE {\nFILTER (?x != ?c)\nFILTER (!isLiteral(?x) OR lang(?x) = '' OR langMatches(lang(?x), 'en'))\n?c ns:location.country.national_anthem ?k .\n?k ns:government.national_anthem_of_a_country.anthem ns:m.02r0hl7 . \n?c ns:location.statistical_region.major_exports ?y .\n?y ns:location.imports_exports_by_industry.industry ?x .\n}\n", 
        "compositionality_type": "composition", 
        "answers": [
            {
                "answer": "Fruit and Tree Nut Farming", 
                "answer_id": "m.03q9v6s", 
                "aliases": []
            }, 
            {
                "answer": "Carpet and Rug Mills", 
                "answer_id": "m.03q9xck", 
                "aliases": []
            }, 
            {
                "answer": "Opium", 
                "answer_id": "m.05pg4", 
                "aliases": []
            }
        ], 
        "created": "2018-02-13T01:57:54"
    }, 
    {
        "ID": "WebQTrn-2373_f5f142961fbb986ee30dc0a419164821", 
        "webqsp_ID": "WebQTrn-2373", 
        "webqsp_question": "what kind of currency do they use in thailand", 
        "machine_question": "what kind of currency do they use in the country that has the national anthem Thai National Anthem", 
        "question": "What kind of money is used in the country that has the Thai National Anthem?", 
        "sparql": "PREFIX ns: <http://rdf.freebase.com/ns/>\nSELECT DISTINCT ?x\nWHERE {\nFILTER (?x != ?c)\nFILTER (!isLiteral(?x) OR lang(?x) = '' OR langMatches(lang(?x), 'en'))\n?c ns:location.country.national_anthem ?k .\n?k ns:government.national_anthem_of_a_country.anthem ns:m.01b8l3 . \n?c ns:location.country.currency_used ?x .\n}\n", 
        "compositionality_type": "composition", 
        "answers": [
            {
                "answer": "Thai baht", 
                "answer_id": "m.0mcb5", 
                "aliases": []
            }
        ], 
        "created": "2018-02-12T23:50:15"
    }, 
    {
        "ID": "WebQTest-1542_6a84ab6bb16c8ec640608733b4177366", 
        "webqsp_ID": "WebQTest-1542", 
        "webqsp_question": "what school does james franco go to", 
        "machine_question": "what school does james franco go to and is the educational institution with the mascot Yale University Handsome Dan", 
        "question": "What university with the mascot \"Handsome Dan\" did James Franco attend?", 
        "sparql": "PREFIX ns: <http://rdf.freebase.com/ns/>\nSELECT DISTINCT ?x\nWHERE {\nFILTER (?x != ns:m.05bnp0)\nFILTER (!isLiteral(?x) OR lang(?x) = '' OR langMatches(lang(?x), 'en'))\nns:m.05bnp0 ns:people.person.education ?y .\n?y ns:education.education.institution ?x .\n?x ns:education.educational_institution.mascot ns:m.05ty1h . \n}", 
        "compositionality_type": "conjunction", 
        "answers": [
            {
                "answer": "University Yale", 
                "answer_id": "m.08815", 
                "aliases": [
                    "Yale University, main campus", 
                    "Yale University", 
                    "Yale University, New Haven", 
                    "YU", 
                    "Yale"
                ]
            }
        ], 
        "created": "2018-02-13T05:32:29"
    }, 
    {
        "ID": "WebQTest-55_2506fa68f5112e77c1167a3aa03f218b", 
        "webqsp_ID": "WebQTest-55", 
        "webqsp_question": "who is michael buble", 
        "machine_question": "who is the person education institution is Cariboo Hill Secondary School", 
        "question": "What did the famous people who wen tot Cariboo Hill Secondary School do?", 
        "sparql": "PREFIX ns: <http://rdf.freebase.com/ns/>\nSELECT DISTINCT ?x\nWHERE {\nFILTER (?x != ?c)\nFILTER (!isLiteral(?x) OR lang(?x) = '' OR langMatches(lang(?x), 'en'))\n?c ns:people.person.education ?k .\n?k ns:education.education.institution ns:m.0dhqrm . \n?c ns:people.person.profession ?x .\n}\n", 
        "compositionality_type": "composition", 
        "answers": [
            {
                "answer": "Actor", 
                "answer_id": "m.02hrh1q", 
                "aliases": [
                    "Film actress", 
                    "Movie actress", 
                    "Movie actor", 
                    "Actress", 
                    "Film actor", 
                    "Theatre Actor"
                ]
            }, 
            {
                "answer": "Singer", 
                "answer_id": "m.09l65", 
                "aliases": [
                    "Vocalist"
                ]
            }, 
            {
                "answer": "Songwriter", 
                "answer_id": "m.0nbcg", 
                "aliases": []
            }
        ], 
        "created": "2018-02-13T02:42:30"
    }, 
    {
        "ID": "WebQTest-1308_471b83eade9707a4dba68e201bf29d73", 
        "webqsp_ID": "WebQTest-1308", 
        "webqsp_question": "what college did jrr tolkien go to", 
        "machine_question": "what college did jrr tolkien go to and the location time zone is Greenwich Mean Time Zone", 
        "question": "What Greenwich Mean Time Zone college did JRR Tolkien go to?", 
        "sparql": "PREFIX ns: <http://rdf.freebase.com/ns/>\nSELECT DISTINCT ?x\nWHERE {\nFILTER (?x != ns:m.041h0)\nFILTER (!isLiteral(?x) OR lang(?x) = '' OR langMatches(lang(?x), 'en'))\nns:m.041h0 ns:people.person.education ?y .\n?y ns:education.education.institution ?x .\n?x ns:common.topic.notable_types ns:m.01y2hnl .\n?x ns:location.location.time_zones ns:m.03bdv . \n}", 
        "compositionality_type": "conjunction", 
        "answers": [
            {
                "answer": "University of Oxford", 
                "answer_id": "m.07tgn", 
                "aliases": [
                    "Universitas Oxoniensis", 
                    "Oxford University"
                ]
            }
        ], 
        "created": "2018-02-13T05:04:28"
    }, 
    {
        "ID": "WebQTrn-209_a7f0de28d079427618de97f04e86483c", 
        "webqsp_ID": "WebQTrn-209", 
        "webqsp_question": "when did kings last win stanley cup", 
        "machine_question": "when did the sports team owner is Edward P. Roski last win stanley cup", 
        "question": "When did the sports team owned by Edward P. Roski most recently win the Stanley Cup?", 
        "sparql": "PREFIX ns: <http://rdf.freebase.com/ns/>\nSELECT DISTINCT ?x\nWHERE {\nFILTER (?x != ?c)\nFILTER (!isLiteral(?x) OR lang(?x) = '' OR langMatches(lang(?x), 'en'))\n?c ns:sports.professional_sports_team.owner_s ns:m.0bydfb . \n?c ns:sports.sports_team.championships ?x .\n?x ns:time.event.end_date ?sk0 .\n}\nORDER BY DESC(xsd:datetime(?sk0))\nLIMIT 1\n", 
        "compositionality_type": "composition", 
        "answers": [
            {
                "answer": "2014 Stanley Cup Finals", 
                "answer_id": "m.010fdzhp", 
                "aliases": []
            }
        ], 
        "created": "2018-02-12T20:00:25"
    }, 
    {
        "ID": "WebQTrn-144_a146bc8a2f79f462a0f325a40f985a63", 
        "webqsp_ID": "WebQTrn-144", 
        "webqsp_question": "who is the president of the european union 2011", 
        "machine_question": "who is the president of the the organiztion leadership has a person named Martin Schulz 2011", 
        "question": "Who was the president of the organization that Martin Schulz was part of in 2011?", 
        "sparql": "PREFIX ns: <http://rdf.freebase.com/ns/>\nSELECT DISTINCT ?x\nWHERE {\nFILTER (?x != ?c)\nFILTER (!isLiteral(?x) OR lang(?x) = '' OR langMatches(lang(?x), 'en'))\n?c ns:organization.organization.leadership ?k .\n?k ns:organization.leadership.person ns:m.05wb09 . \n?c ns:government.governmental_jurisdiction.governing_officials ?y .\n?y ns:government.government_position_held.office_holder ?x .\n?y ns:government.government_position_held.office_position_or_title ns:m.039h0j .\nFILTER(NOT EXISTS {?y ns:government.government_position_held.from ?sk0} || \nEXISTS {?y ns:government.government_position_held.from ?sk1 . \nFILTER(xsd:datetime(?sk1) <= \"2011-12-31\"^^xsd:dateTime) })\nFILTER(NOT EXISTS {?y ns:government.government_position_held.to ?sk2} || \nEXISTS {?y ns:government.government_position_held.to ?sk3 . \nFILTER(xsd:datetime(?sk3) >= \"2011-01-01\"^^xsd:dateTime) })\n}\n", 
        "compositionality_type": "composition", 
        "answers": [
            {
                "answer": "Jerzy Buzek", 
                "answer_id": "m.036y38", 
                "aliases": [
                    "Jerzy Karol Buzek"
                ]
            }
        ], 
        "created": "2018-02-12T19:51:25"
    }, 
    {
        "ID": "WebQTest-939_bb949340bcc140182ac61775c7ccc0e9", 
        "webqsp_ID": "WebQTest-939", 
        "webqsp_question": "what type of art did pablo picasso paint", 
        "machine_question": "what type of art did the illustrator of the book Feu de joie paint", 
        "question": "What Art styles were painted by the perosn who illustrated the book Feu de joie?", 
        "sparql": "PREFIX ns: <http://rdf.freebase.com/ns/>\nSELECT DISTINCT ?x\nWHERE {\nFILTER (?x != ?c)\nFILTER (!isLiteral(?x) OR lang(?x) = '' OR langMatches(lang(?x), 'en'))\n?c ns:book.illustrator.books_illustrated ns:m.0678xv0 . \n?c ns:visual_art.visual_artist.associated_periods_or_movements ?x .\n}\n", 
        "compositionality_type": "composition", 
        "answers": [
            {
                "answer": "Modern art", 
                "answer_id": "m.015r61", 
                "aliases": []
            }, 
            {
                "answer": "Analytic cubism", 
                "answer_id": "m.070vcg", 
                "aliases": []
            }, 
            {
                "answer": "Picasso's Rose Period", 
                "answer_id": "m.071bmq", 
                "aliases": []
            }, 
            {
                "answer": "Picasso's Blue Period", 
                "answer_id": "m.072333", 
                "aliases": []
            }, 
            {
                "answer": "Surrealism", 
                "answer_id": "m.073_6", 
                "aliases": [
                    "Surrealist"
                ]
            }, 
            {
                "answer": "Picasso's African Period", 
                "answer_id": "m.07hm5p", 
                "aliases": []
            }, 
            {
                "answer": "Synthetic cubism", 
                "answer_id": "m.07pcpz", 
                "aliases": []
            }, 
            {
                "answer": "Cubism", 
                "answer_id": "m.09ff3", 
                "aliases": [
                    "Cubist"
                ]
            }
        ], 
        "created": "2018-02-13T04:26:18"
    }, 
    {
        "ID": "WebQTrn-463_682800b1263c4a6d5b650e4196fc2b7d", 
        "webqsp_ID": "WebQTrn-463", 
        "webqsp_question": "where is the euro 2012 tournament", 
        "machine_question": "where is the euro 2012 tournament and the location time zone is Central European Time Zone", 
        "question": "Where was the Euro 2012 tournament held in the Central European Time Zone?", 
        "sparql": "PREFIX ns: <http://rdf.freebase.com/ns/>\nSELECT DISTINCT ?x\nWHERE {\nFILTER (?x != ns:m.06t1s0)\nFILTER (!isLiteral(?x) OR lang(?x) = '' OR langMatches(lang(?x), 'en'))\nns:m.06t1s0 ns:time.event.locations ?x .\n?x ns:location.location.time_zones ns:m.02llzg . \n}", 
        "compositionality_type": "conjunction", 
        "answers": [
            {
                "answer": "Gda\u0144sk", 
                "answer_id": "m.035m6", 
                "aliases": [
                    "Gdansk", 
                    "Danzig"
                ]
            }, 
            {
                "answer": "Pozna\u0144", 
                "answer_id": "m.05xnv", 
                "aliases": [
                    "Poznan", 
                    "Sto\u0142eczne Miasto Pozna\u0144", 
                    "Miasto Poznan"
                ]
            }, 
            {
                "answer": "Warsaw", 
                "answer_id": "m.081m_", 
                "aliases": [
                    "phoenix city", 
                    "Varsovia", 
                    "Miasto Warszawa", 
                    "Hu\u00e1sh\u0101", 
                    "Varsovie", 
                    "Varshe", 
                    "Varsha", 
                    "\u83ef\u6c99", 
                    "Var\u0161uva", 
                    "Vars\u00f3", 
                    "W\u0101rs\u014d", 
                    "Var\u0161ava", 
                    "Varsavia", 
                    "Warszawa", 
                    "\u0412\u0430\u0440\u0448\u0430\u0432\u0430/Varshava", 
                    "F\u0101rs\u014dfy\u0101", 
                    "Warschau"
                ]
            }, 
            {
                "answer": "Wroc\u0142aw", 
                "answer_id": "m.0845b", 
                "aliases": [
                    "Miasto Wroclaw", 
                    "Breslau"
                ]
            }
        ], 
        "created": "2018-02-12T20:30:27"
    }, 
    {
        "ID": "WebQTest-1056_fc7f6d4fad1c5a6f0d9ecaeb2742de45", 
        "webqsp_ID": "WebQTest-1056", 
        "webqsp_question": "who did the cleveland cavaliers draft", 
        "machine_question": "who did the cleveland cavaliers draft and is the player started his career on latest", 
        "question": "What player who started his career latest did the Cleveland Cavaliers draft?", 
        "sparql": "PREFIX ns: <http://rdf.freebase.com/ns/>\nSELECT DISTINCT ?x\nWHERE {\nFILTER (?x != ns:m.0jm7n)\nFILTER (!isLiteral(?x) OR lang(?x) = '' OR langMatches(lang(?x), 'en'))\nns:m.0jm7n ns:sports.professional_sports_team.draft_picks ?y .\n?y ns:sports.sports_league_draft_pick.player ?x .\n?x ns:sports.pro_athlete.sports_played_professionally ?c .\n?c ns:sports.pro_sports_played.career_start ?num .\n}\nORDER BY DESC(?num) LIMIT 1", 
        "compositionality_type": "superlative", 
        "answers": [
            {
                "answer": "Andrew Wiggins", 
                "answer_id": "m.0kg2hkr", 
                "aliases": [
                    "Andrew Christian Wiggins"
                ]
            }
        ], 
        "created": "2018-02-13T04:33:59"
    }, 
    {
        "ID": "WebQTest-1468_162c8a75fa1a4be14098238ce49ecb89", 
        "webqsp_ID": "WebQTest-1468", 
        "webqsp_question": "what sri lanka capital", 
        "machine_question": "what the location partially contains Devapathiraja College capital", 
        "question": "What is the capital city of the country where Devapathiraja College is located in?", 
        "sparql": "PREFIX ns: <http://rdf.freebase.com/ns/>\nSELECT DISTINCT ?x\nWHERE {\nFILTER (?x != ?c)\nFILTER (!isLiteral(?x) OR lang(?x) = '' OR langMatches(lang(?x), 'en'))\n?c ns:location.location.partiallycontains ?k .\n?k ns:location.partial_containment_relationship.partially_contains ns:m.05zrct0 . \n?c ns:location.country.capital ?x .\n}\n", 
        "compositionality_type": "composition", 
        "answers": [
            {
                "answer": "Sri Jayawardenepura Kotte", 
                "answer_id": "m.02r9rz", 
                "aliases": []
            }, 
            {
                "answer": "Colombo", 
                "answer_id": "m.0fn7r", 
                "aliases": [
                    "Colombo, Sri Lanka"
                ]
            }
        ], 
        "created": "2018-02-13T05:24:36"
    }, 
    {
        "ID": "WebQTrn-2646_682800b1263c4a6d5b650e4196fc2b7d", 
        "webqsp_ID": "WebQTrn-2646", 
        "webqsp_question": "where did johann sebastian bach live", 
        "machine_question": "where did johann sebastian bach live and the location time zone is Central European Time Zone", 
        "question": "Where did Johann Sebastian Bach live in the Central European Time Zone?", 
        "sparql": "PREFIX ns: <http://rdf.freebase.com/ns/>\nSELECT DISTINCT ?x\nWHERE {\nFILTER (?x != ns:m.03_f0)\nFILTER (!isLiteral(?x) OR lang(?x) = '' OR langMatches(lang(?x), 'en'))\nns:m.03_f0 ns:people.person.places_lived ?y .\n?y ns:people.place_lived.location ?x .\n?x ns:location.location.time_zones ns:m.02llzg . \n}", 
        "compositionality_type": "conjunction", 
        "answers": [
            {
                "answer": "Leipzig", 
                "answer_id": "m.04kf4", 
                "aliases": [
                    "Leipzig, Germany"
                ]
            }, 
            {
                "answer": "Arnstadt", 
                "answer_id": "m.04pwrt", 
                "aliases": [
                    "Arnstadt, Germany"
                ]
            }
        ], 
        "created": "2018-02-13T00:22:50"
    }, 
    {
        "ID": "WebQTrn-2972_c86e1bcec541db03e4630214b34df153", 
        "webqsp_ID": "WebQTrn-2972", 
        "webqsp_question": "who is the owner of the philadelphia eagles", 
        "machine_question": "who is the owner of the the organiztion leadership has a person named Harry Gamble", 
        "question": "Harry Gamble is a person in the organization by which owner?", 
        "sparql": "PREFIX ns: <http://rdf.freebase.com/ns/>\nSELECT DISTINCT ?x\nWHERE {\nFILTER (?x != ?c)\nFILTER (!isLiteral(?x) OR lang(?x) = '' OR langMatches(lang(?x), 'en'))\n?c ns:organization.organization.leadership ?k .\n?k ns:organization.leadership.person ns:m.0_h1ksp . \n?c ns:business.employer.employees ?y .\n?y ns:business.employment_tenure.person ?x .\n?y ns:business.employment_tenure.title ns:m.02kbqmz .\n}\n", 
        "compositionality_type": "composition", 
        "answers": [
            {
                "answer": "Jeffrey Lurie", 
                "answer_id": "m.092dqb", 
                "aliases": [
                    "Jeff Lurie"
                ]
            }
        ], 
        "created": "2018-02-13T00:58:58"
    }, 
    {
        "ID": "WebQTest-1117_6cdd814a9c551d0e878a6ca6d7434940", 
        "webqsp_ID": "WebQTest-1117", 
        "webqsp_question": "where do they speak german", 
        "machine_question": "where do they speak german and is the country that contains Aarhus County", 
        "question": "What European Union country speaking German is also home to Aarhus County?", 
        "sparql": "PREFIX ns: <http://rdf.freebase.com/ns/>\nSELECT DISTINCT ?x\nWHERE {\nFILTER (?x != ns:m.04306rv)\nFILTER (!isLiteral(?x) OR lang(?x) = '' OR langMatches(lang(?x), 'en'))\nns:m.04306rv ns:language.human_language.countries_spoken_in ?x .\n?x ns:location.country.administrative_divisions ns:m.0125rc . \n}", 
        "compositionality_type": "conjunction", 
        "answers": [
            {
                "answer": "Denmark", 
                "answer_id": "m.0k6nt", 
                "aliases": [
                    "D\u00e4nemark", 
                    "Kingdom of Denmark", 
                    "Kongeriget Danmark", 
                    "\u4e39\u9ea6"
                ]
            }
        ], 
        "created": "2018-02-13T04:45:05"
    }, 
    {
        "ID": "WebQTrn-1680_018dc0c070e53555fa37f63d4b83ca87", 
        "webqsp_ID": "WebQTrn-1680", 
        "webqsp_question": "who is the ravens quarterback 2012", 
        "machine_question": "who is the the team has a team moscot named Poe quarterback 2012", 
        "question": "Who played quarterback in 2012 for the sports team whose mascot is named Poe?", 
        "sparql": "PREFIX ns: <http://rdf.freebase.com/ns/>\nSELECT DISTINCT ?x\nWHERE {\nFILTER (?x != ?c)\nFILTER (!isLiteral(?x) OR lang(?x) = '' OR langMatches(lang(?x), 'en'))\n?c ns:sports.sports_team.team_mascot ns:m.052tmyg . \n?c ns:sports.sports_team.roster ?y .\n?y ns:sports.sports_team_roster.player ?x .\n?y ns:sports.sports_team_roster.position ns:m.06b1q .\nFILTER(NOT EXISTS {?y ns:sports.sports_team_roster.from ?sk0} || \nEXISTS {?y ns:sports.sports_team_roster.from ?sk1 . \nFILTER(xsd:datetime(?sk1) <= \"2012-12-31\"^^xsd:dateTime) })\nFILTER(NOT EXISTS {?y ns:sports.sports_team_roster.to ?sk2} || \nEXISTS {?y ns:sports.sports_team_roster.to ?sk3 . \nFILTER(xsd:datetime(?sk3) >= \"2012-01-01\"^^xsd:dateTime) })\n}\n", 
        "compositionality_type": "composition", 
        "answers": [
            {
                "answer": "Curtis Painter", 
                "answer_id": "m.026rk1d", 
                "aliases": [
                    "Curtis Jeffrey Painter"
                ]
            }, 
            {
                "answer": "Randall Cunningham", 
                "answer_id": "m.037fnz", 
                "aliases": [
                    "Randall W. Cunningham"
                ]
            }, 
            {
                "answer": "Tyrod Taylor", 
                "answer_id": "m.03bzp9z", 
                "aliases": []
            }, 
            {
                "answer": "Joe Flacco", 
                "answer_id": "m.03d4lw7", 
                "aliases": [
                    "Joseph Vincent  Flacco"
                ]
            }, 
            {
                "answer": "Trent Dilfer", 
                "answer_id": "m.051q4v", 
                "aliases": [
                    "Trent Farris Dilfer"
                ]
            }, 
            {
                "answer": "Scott Mitchell", 
                "answer_id": "m.0fr2ql", 
                "aliases": [
                    "William Scott Mitchell"
                ]
            }, 
            {
                "answer": "Chester Stewart", 
                "answer_id": "m.0jt9r2w", 
                "aliases": []
            }
        ], 
        "created": "2018-02-12T22:42:25"
    }, 
    {
        "ID": "WebQTrn-921_eba9c2e29a1198e8b56c2f7e4210638b", 
        "webqsp_ID": "WebQTrn-921", 
        "webqsp_question": "what is vanderbilt 's mascot", 
        "machine_question": "what is the organiztion leadership has a person named Nicholas S. Zeppos 's mascot", 
        "question": "What is the school mascot of the organization where the leadership includes someone named Nicholas S. Zeppo?", 
        "sparql": "PREFIX ns: <http://rdf.freebase.com/ns/>\nSELECT DISTINCT ?x\nWHERE {\nFILTER (?x != ?c)\nFILTER (!isLiteral(?x) OR lang(?x) = '' OR langMatches(lang(?x), 'en'))\n?c ns:organization.organization.leadership ?k .\n?k ns:organization.leadership.person ns:m.02vymvp . \n?c ns:education.educational_institution.mascot ?x .\n}\n", 
        "compositionality_type": "composition", 
        "answers": [
            {
                "answer": "Vanderbilt University Mr. Commodore", 
                "answer_id": "m.05k6hxh", 
                "aliases": []
            }
        ], 
        "created": "2018-02-12T21:20:40"
    }, 
    {
        "ID": "WebQTrn-1895_906ad6be7bec9d208f4dde4f7721c261", 
        "webqsp_ID": "WebQTrn-1895", 
        "webqsp_question": "what did maria theresa rule", 
        "machine_question": "what did maria theresa rule and is the co2 emiisions per capita was once 2009 metric ton", 
        "question": "What country with co2 emissions per capita once of 2009 metric ton did Maria Theresa rule?", 
        "sparql": "PREFIX ns: <http://rdf.freebase.com/ns/>\nSELECT DISTINCT ?x\nWHERE {\nFILTER (?x != ns:m.0czh6)\nFILTER (!isLiteral(?x) OR lang(?x) = '' OR langMatches(lang(?x), 'en'))\nns:m.0czh6 ns:royalty.monarch.kingdom ?x .\n?x ns:location.statistical_region.co2_emissions_per_capita ?c .\n?c ns:measurement_unit.dated_metric_ton.date \"2009\"^^xsd:dateTime . \n}", 
        "compositionality_type": "conjunction", 
        "answers": [
            {
                "answer": "Hungary", 
                "answer_id": "m.03gj2", 
                "aliases": [
                    "Magyarorsz\u00e1g", 
                    "Hungary, Europe"
                ]
            }
        ], 
        "created": "2018-02-12T23:02:53"
    }, 
    {
        "ID": "WebQTrn-551_385674eadd1135c1052afdcffc49b63e", 
        "webqsp_ID": "WebQTrn-551", 
        "webqsp_question": "what teams did charles barkley", 
        "machine_question": "what teams did charles barkley and the sports team owner is Will Smith", 
        "question": "What sports team owned by Will Smith did Charles Barkley play for?", 
        "sparql": "PREFIX ns: <http://rdf.freebase.com/ns/>\nSELECT DISTINCT ?x\nWHERE {\nFILTER (?x != ns:m.01ck_1)\nFILTER (!isLiteral(?x) OR lang(?x) = '' OR langMatches(lang(?x), 'en'))\nns:m.01ck_1 ns:basketball.basketball_player.player_statistics ?y .\n?y ns:basketball.basketball_player_stats.team ?x .\n?x ns:sports.professional_sports_team.owner_s ns:m.0147dk . \n}", 
        "compositionality_type": "conjunction", 
        "answers": [
            {
                "answer": "Philadelphia 76ers", 
                "answer_id": "m.0jm4v", 
                "aliases": [
                    "Sixers", 
                    "76ers"
                ]
            }
        ], 
        "created": "2018-02-12T20:43:01"
    }, 
    {
        "ID": "WebQTest-1560_ac8af71653951589b9f019f502b6afa3", 
        "webqsp_ID": "WebQTest-1560", 
        "webqsp_question": "who founded new york university", 
        "machine_question": "who founded the educational institution newspaper is Washington Square News", 
        "question": "Who was the founder of the Washington Square news?", 
        "sparql": "PREFIX ns: <http://rdf.freebase.com/ns/>\nSELECT DISTINCT ?x\nWHERE {\nFILTER (?x != ?c)\nFILTER (!isLiteral(?x) OR lang(?x) = '' OR langMatches(lang(?x), 'en'))\n?c ns:education.educational_institution.newspaper ns:m.078d2b . \n?c ns:organization.organization.founders ?x .\n}\n", 
        "compositionality_type": "composition", 
        "answers": [
            {
                "answer": "Albert Gallatin", 
                "answer_id": "m.01p369", 
                "aliases": []
            }, 
            {
                "answer": "Mordecai Manuel Noah", 
                "answer_id": "m.05m665", 
                "aliases": [
                    "M. M. Noah"
                ]
            }
        ], 
        "created": "2018-02-13T05:34:06"
    }, 
    {
        "ID": "WebQTest-98_42588c6fd3d30a777953bbaf2b4079b9", 
        "webqsp_ID": "WebQTest-98", 
        "webqsp_question": "who was vice president when jfk was president", 
        "machine_question": "who was vice president when the person education institution is Edward Devotion School was president", 
        "question": "Who was the Vice President of the President educated at Edward Devotion School?", 
        "sparql": "PREFIX ns: <http://rdf.freebase.com/ns/>\nSELECT DISTINCT ?x\nWHERE {\nFILTER (?x != ?c)\nFILTER (!isLiteral(?x) OR lang(?x) = '' OR langMatches(lang(?x), 'en'))\n?c ns:people.person.education ?k .\n?k ns:education.education.institution ns:m.0ccg42 . \n?c ns:government.us_president.vice_president ?x .\n}\n", 
        "compositionality_type": "composition", 
        "answers": [
            {
                "answer": "Lyndon B. Johnson", 
                "answer_id": "m.0f7fy", 
                "aliases": [
                    "President Lyndon Johnson", 
                    "LBJ", 
                    "L.B.J.", 
                    "Johnson, Lyndon B.", 
                    "Lyndon Johnson", 
                    "Sen. Lyndon B. Johnson", 
                    "Lindon B. Johnson", 
                    "Lyndon B Johnson", 
                    "Lyndon Baines Johnson", 
                    "Landslide Lyndon", 
                    "Johnson, Light Bulb", 
                    "President Lyndon B. Johnson"
                ]
            }
        ], 
        "created": "2018-02-13T02:46:00"
    }, 
    {
        "ID": "WebQTrn-229_52cbd36b86588e3b6e38b0ba8dc53c62", 
        "webqsp_ID": "WebQTrn-229", 
        "webqsp_question": "what language do they speak in thai", 
        "machine_question": "what language do they speak in the country that contains Lopburi Province", 
        "question": "Which language is spoken in the country, that includes, the Lopburi Province?", 
        "sparql": "PREFIX ns: <http://rdf.freebase.com/ns/>\nSELECT DISTINCT ?x\nWHERE {\nFILTER (?x != ?c)\nFILTER (!isLiteral(?x) OR lang(?x) = '' OR langMatches(lang(?x), 'en'))\n?c ns:location.country.administrative_divisions ns:m.01kjwm . \n?c ns:location.country.official_language ?x .\n}\n", 
        "compositionality_type": "composition", 
        "answers": [
            {
                "answer": "Thai Language", 
                "answer_id": "m.0c_v2", 
                "aliases": [
                    "Siamese", 
                    "Thaiklang", 
                    "Thai", 
                    "Standard Thai", 
                    "Central Tai"
                ]
            }
        ], 
        "created": "2018-02-12T20:03:19"
    }, 
    {
        "ID": "WebQTest-596_195aea15f539da9fcee571e7a04cd438", 
        "webqsp_ID": "WebQTest-596", 
        "webqsp_question": "where did kansas city royals come from", 
        "machine_question": "where did the team has a team moscot named Sluggerrr come from", 
        "question": "Which city is the team that has a mascot called Sluggerrr from?", 
        "sparql": "PREFIX ns: <http://rdf.freebase.com/ns/>\nSELECT DISTINCT ?x\nWHERE {\nFILTER (?x != ?c)\nFILTER (!isLiteral(?x) OR lang(?x) = '' OR langMatches(lang(?x), 'en'))\n?c ns:sports.sports_team.team_mascot ns:m.026qn67 . \n?c ns:sports.sports_team.location ?x .\n}\n", 
        "compositionality_type": "composition", 
        "answers": [
            {
                "answer": "Kansas City", 
                "answer_id": "m.04f_d", 
                "aliases": [
                    "Kansas", 
                    "Kansas City, Missouri", 
                    "Platte County / Kansas City city"
                ]
            }
        ], 
        "created": "2018-02-13T03:49:17"
    }, 
    {
        "ID": "WebQTrn-256_56db047b2b9998c2b4e9115b94cf1e39", 
        "webqsp_ID": "WebQTrn-256", 
        "webqsp_question": "which countries have english as native language", 
        "machine_question": "which countries have english as native language and is the location that appointed Charles Haughey to govermental position", 
        "question": "What English speaking country that appointed Chrles Haughey to government position?", 
        "sparql": "PREFIX ns: <http://rdf.freebase.com/ns/>\nSELECT DISTINCT ?x\nWHERE {\nFILTER (?x != ns:m.02h40lc)\nFILTER (!isLiteral(?x) OR lang(?x) = '' OR langMatches(lang(?x), 'en'))\nns:m.02h40lc ns:language.human_language.main_country ?x .\n?x ns:government.governmental_jurisdiction.governing_officials ?c .\n?c ns:government.government_position_held.appointed_by ns:m.012s1x . \n}", 
        "compositionality_type": "conjunction", 
        "answers": [
            {
                "answer": "Republic of Ireland", 
                "answer_id": "m.03rt9", 
                "aliases": [
                    "the twenty-six counties", 
                    "the Free State", 
                    "Irish Republic", 
                    "the 26 counties", 
                    "\u00c9ire"
                ]
            }
        ], 
        "created": "2018-02-12T20:08:22"
    }, 
    {
        "ID": "WebQTrn-560_d74f84f4fc152209586124e1929bcfe1", 
        "webqsp_ID": "WebQTrn-560", 
        "webqsp_question": "how many teams are there in the ncaa football", 
        "machine_question": "how many teams are there in the the child organization is NCAA Division III football", 
        "question": "How many teams are in the NCAA Division III football organization?", 
        "sparql": "PREFIX ns: <http://rdf.freebase.com/ns/>\nSELECT DISTINCT ?x\nWHERE {\nFILTER (?x != ?c)\nFILTER (!isLiteral(?x) OR lang(?x) = '' OR langMatches(lang(?x), 'en'))\n?c ns:organization.organization.child ?k .\n?k ns:organization.organization_relationship.child ns:m.03kp55 . \n?c ns:sports.sports_league.teams ?y .\n?y ns:sports.sports_league_participation.team ?x .\n?x ns:common.topic.notable_types ns:m.01xljyt .\n}\n", 
        "compositionality_type": "composition", 
        "answers": [
            {
                "answer": "Stanford Cardinal football", 
                "answer_id": "m.02pd1tf", 
                "aliases": [
                    "Stanford University Football", 
                    "Stanford University Men's Football", 
                    "Stanford University Cardinal Football", 
                    "Stanford Cardinal Men's Football", 
                    "Stanford Cardinal Football", 
                    "Stanford University Cardinal Men's Football", 
                    "Stanford University Cardinal Mens Football", 
                    "Stanford Mens Football", 
                    "Stanford Football", 
                    "Stanford Cardinal Mens Football", 
                    "Stanford University Mens Football", 
                    "Stanford Men's Football"
                ]
            }, 
            {
                "answer": "USC Trojans football", 
                "answer_id": "m.07k53y", 
                "aliases": [
                    "Southern California Trojans Mens Football", 
                    "USC Trojans Football", 
                    "University of Southern California Mens Football", 
                    "Southern California Football", 
                    "USC Trojans Mens Football", 
                    "USC Men's Football", 
                    "USC Mens Football", 
                    "University of Southern California Football", 
                    "Southern California Trojans Football", 
                    "USC Football", 
                    "University of Southern California Men's Football", 
                    "Southern California Men's Football", 
                    "University of Southern California Trojans Football", 
                    "University of Southern California Trojans Men's Football", 
                    "USC Trojans Men's Football", 
                    "Southern California Trojans Men's Football", 
                    "University of Southern California Trojans Mens Football", 
                    "Southern California Mens Football"
                ]
            }, 
            {
                "answer": "Miami Hurricanes football", 
                "answer_id": "m.07kcvl", 
                "aliases": [
                    "U of M Hurricanes Men's Football", 
                    "The U Mens Football", 
                    "UM Men's Football", 
                    "U of M Football", 
                    "Miami Mens Football", 
                    "U of M Men's Football", 
                    "Miami Hurricanes Men's Football", 
                    "University of Miami Canes Mens Football", 
                    "U of M Hurricanes Mens Football", 
                    "University of Miami Canes Men's Football", 
                    "Miami Hurricanes Football", 
                    "Miami Canes Mens Football", 
                    "UM Football", 
                    "University of Miami Hurricanes Men's Football", 
                    "University of Miami Football", 
                    "Miami Canes Football", 
                    "U of M Canes Mens Football", 
                    "UM Canes Mens Football", 
                    "The U Football", 
                    "UM Canes Men's Football", 
                    "U of M Canes Football", 
                    "Miami Men's Football", 
                    "Miami Hurricanes Mens Football", 
                    "University of Miami Hurricanes Mens Football", 
                    "University of Miami Mens Football", 
                    "UM Hurricanes Football", 
                    "UM Mens Football", 
                    "University of Miami Hurricanes Football", 
                    "UM Canes Football", 
                    "U of M Hurricanes Football", 
                    "The U Men's Football", 
                    "UM Hurricanes Men's Football", 
                    "U of M Canes Men's Football", 
                    "University of Miami Men's Football", 
                    "UM Hurricanes Mens Football", 
                    "Miami Football", 
                    "University of Miami Canes Football", 
                    "Miami Canes Men's Football", 
                    "U of M Mens Football"
                ]
            }, 
            {
                "answer": "Auburn Tigers football", 
                "answer_id": "m.086hg9", 
                "aliases": [
                    "Auburn Football", 
                    "Auburn Tigers Mens Football", 
                    "Auburn Men's Football", 
                    "Auburn University Men's Football", 
                    "Auburn Tigers Men's Football", 
                    "Auburn University Tigers Men's Football", 
                    "Auburn University Tigers Mens Football", 
                    "Auburn Tigers Football", 
                    "Auburn University Mens Football", 
                    "Auburn Mens Football", 
                    "Auburn University Football"
                ]
            }, 
            {
                "answer": "Nebraska Cornhuskers football", 
                "answer_id": "m.0bjkk9", 
                "aliases": [
                    "University of Nebraska Cornhuskers Football", 
                    "University of Nebraska Mens Football", 
                    "University of Nebraska Men's Football", 
                    "University of Nebraska Cornhuskers Mens Football", 
                    "University of Nebraska Huskers Mens Football", 
                    "University of Nebraska Huskers Men's Football", 
                    "Nebraska Football", 
                    "Nebraska Cornhuskers Mens Football", 
                    "University of Nebraska Cornhuskers Men's Football", 
                    "Nebraska Mens Football", 
                    "University of Nebraska Football", 
                    "Nebraska Huskers Football", 
                    "University of Nebraska Huskers Football", 
                    "Nebraska Cornhuskers Football", 
                    "Nebraska Men's Football", 
                    "Nebraska Huskers Men's Football", 
                    "Nebraska Cornhuskers Men's Football", 
                    "Nebraska Huskers Mens Football"
                ]
            }, 
            {
                "answer": "Oregon Ducks football", 
                "answer_id": "m.0fbq2n", 
                "aliases": [
                    "Oregon Mens Football", 
                    "University of Oregon Mens Football", 
                    "Oregon Men's Football", 
                    "University of Oregon Ducks Mens Football", 
                    "University of Oregon Ducks Men's Football", 
                    "Oregon Ducks Mens Football", 
                    "University of Oregon Ducks Football", 
                    "Oregon Ducks Football", 
                    "University of Oregon Men's Football", 
                    "Oregon Football", 
                    "Oregon Ducks Men's Football", 
                    "University of Oregon Football"
                ]
            }, 
            {
                "answer": "LSU Tigers football", 
                "answer_id": "m.0fht9f", 
                "aliases": [
                    "Louisiana State Bayou Bengals Football", 
                    "LSU Fighting Tigers Football", 
                    "Louisiana State University Bayou Bengals Mens Football", 
                    "Louisiana State University Tigers Men's Football", 
                    "Bayou Bengals", 
                    "LSU Fighting Tigers Mens Football", 
                    "Louisiana State University Bayou Bengals Football", 
                    "LSU Bayou Bengals Football", 
                    "LSU Tigers Men's Football", 
                    "Louisiana State Fighting Tigers Men's Football", 
                    "Louisiana State University Fighting Tigers Mens Football", 
                    "Louisiana State University Tigers Mens Football", 
                    "Louisiana State Bayou Bengals Men's Football", 
                    "LSU Bayou Bengals Men's Football", 
                    "Louisiana State University Fighting Tigers Football", 
                    "Louisiana State Fighting Tigers Mens Football", 
                    "Louisiana State Bayou Bengals Mens Football", 
                    "LSU Tigers Mens Football", 
                    "Louisiana State University Bayou Bengals Men's Football", 
                    "Louisiana State Fighting Tigers Football", 
                    "Fighting Tigers", 
                    "Louisiana State University Fighting Tigers Men's Football", 
                    "Louisiana State Tigers Football", 
                    "LSU Fighting Tigers Men's Football", 
                    "Louisiana State Tigers Men's Football", 
                    "LSU Tigers Football", 
                    "Louisiana State Tigers Mens Football", 
                    "LSU Bayou Bengals Mens Football", 
                    "Louisiana State University Tigers Football"
                ]
            }, 
            {
                "answer": "Ohio State Buckeyes football", 
                "answer_id": "m.0fjzsy", 
                "aliases": [
                    "Ohio State Football", 
                    "OSU Buckeyes Football", 
                    "Ohio State University Buckeyes Mens Football", 
                    "Ohio State Buckeyes Men's Football", 
                    "Ohio State University Mens Football", 
                    "OSU Buckeyes Men's Football", 
                    "Ohio State Men's Football", 
                    "Ohio State University Buckeyes Football", 
                    "Ohio State University Buckeyes Men's Football", 
                    "Ohio State Buckeyes Mens Football", 
                    "Ohio State Buckeyes Football", 
                    "Ohio State University Football", 
                    "Ohio State Mens Football", 
                    "OSU Buckeyes Mens Football", 
                    "Ohio State University Men's Football"
                ]
            }, 
            {
                "answer": "Penn State Nittany Lions football", 
                "answer_id": "m.0frm7n", 
                "aliases": [
                    "Penn State University Men's Football", 
                    "PSU Men's Football", 
                    "Penn State Football", 
                    "PSU Nittany Lions Football", 
                    "Penn State University Nittany Lions Football", 
                    "Penn State Nittany Lions Football", 
                    "Penn State University Nittany Lions Men's Football", 
                    "Penn State Nittany Lions Mens Football", 
                    "Penn State Mens Football", 
                    "Penn State University Mens Football", 
                    "Penn State Men's Football", 
                    "PSU Mens Football", 
                    "Penn State University Nittany Lions Mens Football", 
                    "PSU Nittany Lions Mens Football", 
                    "PSU Football", 
                    "Penn  State University Football", 
                    "Penn State Nittany Lions Men's Football", 
                    "PSU Nittany Lions Men's Football"
                ]
            }, 
            {
                "answer": "Michigan Wolverines football", 
                "answer_id": "m.0fsb_6", 
                "aliases": [
                    "Michigan Men's Football", 
                    "Michigan Mens Football", 
                    "University of Michigan Men's Football", 
                    "Michigan Wolverines Men's Football", 
                    "University of Michigan Wolverines Mens Football", 
                    "University of MIchigan Mens Football", 
                    "University of Michigan Wolverines Men's Football", 
                    "Michigan Football", 
                    "Michigan Wolverines Mens Football", 
                    "Michigan Wolverines Football", 
                    "University of Michigan Football", 
                    "University of Michigan Wolverines Football"
                ]
            }
        ], 
        "created": "2018-02-12T20:43:33"
    }, 
    {
        "ID": "WebQTrn-413_74c5edd9a79d51772446ff4746bd318f", 
        "webqsp_ID": "WebQTrn-413", 
        "webqsp_question": "what type of language does china speak", 
        "machine_question": "what type of language does the currency used in the country is Renminbi speak", 
        "question": "What language is used in the country that uses Renminbi as currency?", 
        "sparql": "PREFIX ns: <http://rdf.freebase.com/ns/>\nSELECT DISTINCT ?x\nWHERE {\nFILTER (?x != ?c)\nFILTER (!isLiteral(?x) OR lang(?x) = '' OR langMatches(lang(?x), 'en'))\n?c ns:location.country.currency_used ns:m.0hn4_ . \n?c ns:location.country.official_language ?x .\n}\n", 
        "compositionality_type": "composition", 
        "answers": [
            {
                "answer": "Standard Chinese", 
                "answer_id": "m.0653m", 
                "aliases": [
                    "Mandarin Chinese", 
                    "Beifang Fangyan", 
                    "Standard Chinese", 
                    "Putonghua", 
                    "Northern Chinese", 
                    "Guoyu", 
                    "Hui", 
                    "Guanhua", 
                    "Hytad", 
                    "Kuoyu", 
                    "Huayu", 
                    "Hanyu", 
                    "Chinese, Mandarin", 
                    "Qotong", 
                    "Mandarin", 
                    "Chinese, Mandarin Language", 
                    "Standard Mandarin", 
                    "Xui", 
                    "Hui-zu", 
                    "Hoton"
                ]
            }
        ], 
        "created": "2018-02-12T20:26:30"
    }, 
    {
        "ID": "WebQTrn-1978_84e5ab7013a2c0dd11f7f61db45df94c", 
        "webqsp_ID": "WebQTrn-1978", 
        "webqsp_question": "what currency is best to take to dominican republic", 
        "machine_question": "what currency is best to take to the country that contains San Pedro de Macor\u00c3\u00ads Province", 
        "question": "The country where San Pedro de Macoris Province is located uses what type of currency?", 
        "sparql": "PREFIX ns: <http://rdf.freebase.com/ns/>\nSELECT DISTINCT ?x\nWHERE {\nFILTER (?x != ?c)\nFILTER (!isLiteral(?x) OR lang(?x) = '' OR langMatches(lang(?x), 'en'))\n?c ns:location.country.administrative_divisions ns:m.03xyyk . \n?c ns:location.country.currency_used ?x .\n}\n", 
        "compositionality_type": "composition", 
        "answers": [
            {
                "answer": "Dominican peso", 
                "answer_id": "m.04lt7_", 
                "aliases": []
            }
        ], 
        "created": "2018-02-12T23:13:06"
    }, 
    {
        "ID": "WebQTrn-3543_a9122e6c3ec58aea7483e18c7074128a", 
        "webqsp_ID": "WebQTrn-3543", 
        "webqsp_question": "what countries does japan export to", 
        "machine_question": "what countries does japan export to and is the country that contains Gilbert Islands", 
        "question": "What country that contains Gilbert Islands does Japan export to?", 
        "sparql": "PREFIX ns: <http://rdf.freebase.com/ns/>\nSELECT DISTINCT ?x\nWHERE {\nFILTER (?x != ns:m.03_3d)\nFILTER (!isLiteral(?x) OR lang(?x) = '' OR langMatches(lang(?x), 'en'))\nns:m.03_3d ns:location.statistical_region.places_exported_to ?y .\n?y ns:location.imports_and_exports.exported_to ?x .\n?x ns:location.country.administrative_divisions ns:m.0101msg_ . \n}", 
        "compositionality_type": "conjunction", 
        "answers": [
            {
                "answer": "Kiribati", 
                "answer_id": "m.047t_", 
                "aliases": [
                    "Republic of Kiribati", 
                    "Gilbert Islands"
                ]
            }
        ], 
        "created": "2018-02-13T02:10:45"
    }, 
    {
        "ID": "WebQTrn-2302_ac67410188d0f2258139a3c84773885e", 
        "webqsp_ID": "WebQTrn-2302", 
        "webqsp_question": "what continent is australia in", 
        "machine_question": "what continent is the location time zone is Central Western Time Zone in", 
        "question": "What continent has the Central Western Time Zone?", 
        "sparql": "PREFIX ns: <http://rdf.freebase.com/ns/>\nSELECT DISTINCT ?x\nWHERE {\nFILTER (?x != ?c)\nFILTER (!isLiteral(?x) OR lang(?x) = '' OR langMatches(lang(?x), 'en'))\n?c ns:location.location.time_zones ns:m.0y498v7 . \n?c ns:location.location.containedby ?x .\n?x ns:common.topic.notable_types ns:m.01mh .\n}\n", 
        "compositionality_type": "composition", 
        "answers": [
            {
                "answer": "Oceania", 
                "answer_id": "m.05nrg", 
                "aliases": []
            }, 
            {
                "answer": "Australian Continent", 
                "answer_id": "m.09pkq0", 
                "aliases": [
                    "Australia", 
                    "Down Under"
                ]
            }
        ], 
        "created": "2018-02-12T23:44:32"
    }, 
    {
        "ID": "WebQTrn-1325_cac7112334650aa7abfe451628131a06", 
        "webqsp_ID": "WebQTrn-1325", 
        "webqsp_question": "who are iran 's major trading partners", 
        "machine_question": "who are iran 's major trading partners and is the location that appointed Hery Rajaonarimampianina to govermental position", 
        "question": "What country is the major trading of Iran and has Hery Rajaonarimampianina to governement position?", 
        "sparql": "#MANUAL SPARQL\nPREFIX ns: <http://rdf.freebase.com/ns/>\nSELECT DISTINCT ?x \nWHERE {\n\tFILTER (?x != ns:m.03shp)\n\t{ \n\t  ns:m.03shp ns:location.statistical_region.places_exported_to ?y .\n\t  ?y ns:location.imports_and_exports.exported_to ?x . \n\t}\n\tUNION\n\t{\n\t  ns:m.03shp ns:location.statistical_region.places_imported_from ?y .\n\t  ?y ns:location.imports_and_exports.imported_from ?x . \n\t}?x ns:government.governmental_jurisdiction.governing_officials ?c .\n?c ns:government.government_position_held.appointed_by ns:m.0zrvfq4 . \n}", 
        "compositionality_type": "conjunction", 
        "answers": [
            {
                "answer": "Madagascar", 
                "answer_id": "m.04sj3", 
                "aliases": [
                    "Republic of Madagascar", 
                    "Malagasy Republic"
                ]
            }
        ], 
        "created": "2018-02-12T22:06:43"
    }, 
    {
        "ID": "WebQTrn-2495_91142cfb73695a1f7a75f96d6720fe46", 
        "webqsp_ID": "WebQTrn-2495", 
        "webqsp_question": "who 's the oakland raiders head coach", 
        "machine_question": "who 's the the team won the Super Bowl XI championship head coach", 
        "question": "Who is the head coach of the team that won the Super Bowl XI championship?", 
        "sparql": "PREFIX ns: <http://rdf.freebase.com/ns/>\nSELECT DISTINCT ?x\nWHERE {\nFILTER (?x != ?c)\nFILTER (!isLiteral(?x) OR lang(?x) = '' OR langMatches(lang(?x), 'en'))\n?c ns:sports.sports_team.championships ns:m.076ps . \n?c ns:american_football.football_team.current_head_coach ?x .\n}\n", 
        "compositionality_type": "composition", 
        "answers": [
            {
                "answer": "Tony Sparano", 
                "answer_id": "m.03h4k5d", 
                "aliases": []
            }
        ], 
        "created": "2018-02-13T00:02:56"
    }, 
    {
        "ID": "WebQTrn-2319_e9de608a162453baa77b7972ae3beb40", 
        "webqsp_ID": "WebQTrn-2319", 
        "webqsp_question": "what is the official language of the ukraine", 
        "machine_question": "what is the official language of the the country that contains Kiev", 
        "question": "What is the official language of the country that has Kiev in it?", 
        "sparql": "PREFIX ns: <http://rdf.freebase.com/ns/>\nSELECT DISTINCT ?x\nWHERE {\nFILTER (?x != ?c)\nFILTER (!isLiteral(?x) OR lang(?x) = '' OR langMatches(lang(?x), 'en'))\n?c ns:location.country.administrative_divisions ns:m.02sn34 . \n?c ns:location.country.languages_spoken ?x .\n}\n", 
        "compositionality_type": "composition", 
        "answers": [
            {
                "answer": "Albanian language", 
                "answer_id": "m.012v8", 
                "aliases": [
                    "Albanian"
                ]
            }, 
            {
                "answer": "Tatar Language", 
                "answer_id": "m.019yz7", 
                "aliases": [
                    "Tartar", 
                    "Tata'er", 
                    "Tatar"
                ]
            }, 
            {
                "answer": "Moldovan language", 
                "answer_id": "m.01h2j_", 
                "aliases": [
                    "Moldovan"
                ]
            }, 
            {
                "answer": "Romanian Language", 
                "answer_id": "m.02hxc3j", 
                "aliases": [
                    "Daco-rumanian", 
                    "Rumanian", 
                    "Romanian language", 
                    "Moldavian", 
                    "Daco-romanian", 
                    "Romanian", 
                    "Roumanian", 
                    "Moldavan"
                ]
            }, 
            {
                "answer": "Hungarian language", 
                "answer_id": "m.02ztjwg", 
                "aliases": [
                    "Hungarian Language", 
                    "Magyar", 
                    "Hungarian"
                ]
            }, 
            {
                "answer": "Russian Language", 
                "answer_id": "m.06b_j", 
                "aliases": [
                    "Russian language", 
                    "Russit", 
                    "Eluosi", 
                    "Olossu", 
                    "Russian", 
                    "Russ", 
                    "Russki"
                ]
            }, 
            {
                "answer": "Ukrainian Language", 
                "answer_id": "m.0cjk9", 
                "aliases": [
                    "Ukrayins'ka mova", 
                    "Ukrainian"
                ]
            }
        ], 
        "created": "2018-02-12T23:45:55"
    }, 
    {
        "ID": "WebQTest-543_7949d2b89e41278756c795d91cc6091a", 
        "webqsp_ID": "WebQTest-543", 
        "webqsp_question": "what college did martin luther king jr go to", 
        "machine_question": "what college did martin luther king jr go to and the educational institution newspaper is B.U. Exposure", 
        "question": "What educational institution with B.U. Exposure newspaper did Martin Luther King Jr. go to college?", 
        "sparql": "PREFIX ns: <http://rdf.freebase.com/ns/>\nSELECT DISTINCT ?x\nWHERE {\nFILTER (?x != ns:m.051cc)\nFILTER (!isLiteral(?x) OR lang(?x) = '' OR langMatches(lang(?x), 'en'))\nns:m.051cc ns:people.person.education ?y .\n?y ns:education.education.institution ?x .\n?x ns:common.topic.notable_types ns:m.01y2hnl .\n?x ns:education.educational_institution.newspaper ns:m.03c3zb3 . \n}", 
        "compositionality_type": "conjunction", 
        "answers": [
            {
                "answer": "Boston University", 
                "answer_id": "m.0gl5_", 
                "aliases": [
                    "BU", 
                    "Boston"
                ]
            }
        ], 
        "created": "2018-02-13T03:45:02"
    }, 
    {
        "ID": "WebQTrn-1620_4c2bbfb641cc9cde2a873099756839a0", 
        "webqsp_ID": "WebQTrn-1620", 
        "webqsp_question": "what are the best places to go in germany", 
        "machine_question": "what are the best places to go in the location contains and airport that server Duisburg", 
        "question": "What are places to go in the location of the Duisburg airport?", 
        "sparql": "PREFIX ns: <http://rdf.freebase.com/ns/>\nSELECT DISTINCT ?x\nWHERE {\nFILTER (?x != ?c)\nFILTER (!isLiteral(?x) OR lang(?x) = '' OR langMatches(lang(?x), 'en'))\n?c ns:location.location.contains ?k .\n?k ns:aviation.airport.serves ns:m.0ps1q . \n?c ns:travel.travel_destination.tourist_attractions ?x .\n}\n", 
        "compositionality_type": "composition", 
        "answers": [
            {
                "answer": "Travefy", 
                "answer_id": "m.012vvtp_", 
                "aliases": []
            }, 
            {
                "answer": "Oktoberfest", 
                "answer_id": "m.05mw0", 
                "aliases": [
                    "oktoberfest", 
                    "oktober fest", 
                    "october fest", 
                    "octoberfest", 
                    "wiesn", 
                    "Oktoberfest in Germany"
                ]
            }, 
            {
                "answer": "Tropical Islands Resort", 
                "answer_id": "m.066tl8", 
                "aliases": []
            }, 
            {
                "answer": "Topography of Terror", 
                "answer_id": "m.0djmy_", 
                "aliases": [
                    "Topography of Terror, Berlin"
                ]
            }, 
            {
                "answer": "Bochum Total", 
                "answer_id": "m.0h1f0zf", 
                "aliases": []
            }
        ], 
        "created": "2018-02-12T22:37:10"
    }, 
    {
        "ID": "WebQTrn-538_64fc62dc06d16e612aafb00889d4ada1", 
        "webqsp_ID": "WebQTrn-538", 
        "webqsp_question": "which countries does russia border", 
        "machine_question": "which countries does russia border and is the location that appointed Mikheil Saakashvili to govermental position", 
        "question": "What country that Russia borders appointed Mikheil Saakashvili to a governmental position?", 
        "sparql": "PREFIX ns: <http://rdf.freebase.com/ns/>\nSELECT DISTINCT ?x\nWHERE {\nFILTER (?x != ns:m.06bnz)\nFILTER (!isLiteral(?x) OR lang(?x) = '' OR langMatches(lang(?x), 'en'))\nns:m.06bnz ns:location.location.adjoin_s ?y .\n?y ns:location.adjoining_relationship.adjoins ?x .\n?x ns:common.topic.notable_types ns:m.01mp .\n?x ns:government.governmental_jurisdiction.governing_officials ?c .\n?c ns:government.government_position_held.appointed_by ns:m.0212q2 . \n}", 
        "compositionality_type": "conjunction", 
        "answers": [
            {
                "answer": "Georgia", 
                "answer_id": "m.0d0kn", 
                "aliases": [
                    "Republic of Georgia"
                ]
            }
        ], 
        "created": "2018-02-12T20:41:49"
    }, 
    {
        "ID": "WebQTest-1382_c372b13f9146eb6304fb4271b197a342", 
        "webqsp_ID": "WebQTest-1382", 
        "webqsp_question": "what other countries border argentina", 
        "machine_question": "what other countries border the religious organization leadeship is Eastern Catholic Churches", 
        "question": "What countries border the Eastern Catholic Churches?", 
        "sparql": "PREFIX ns: <http://rdf.freebase.com/ns/>\nSELECT DISTINCT ?x\nWHERE {\nFILTER (?x != ?c)\nFILTER (!isLiteral(?x) OR lang(?x) = '' OR langMatches(lang(?x), 'en'))\n?c ns:religion.religious_leadership_jurisdiction.leader ?k .\n?k ns:religion.religious_organization_leadership.organization ns:m.01fgks . \n?c ns:location.location.adjoin_s ?y .\n?y ns:location.adjoining_relationship.adjoins ?x .\n?x ns:common.topic.notable_types ns:m.01mp .\n}\n", 
        "compositionality_type": "composition", 
        "answers": [
            {
                "answer": "Brazil", 
                "answer_id": "m.015fr", 
                "aliases": [
                    "Brazilian ", 
                    "Rep\u00fablica Federativa do Brasil", 
                    "Brasil", 
                    "Federative Republic of Brazil"
                ]
            }, 
            {
                "answer": "Bolivia", 
                "answer_id": "m.0165v", 
                "aliases": [
                    "The Plurinational State of Bolivia"
                ]
            }, 
            {
                "answer": "Chile", 
                "answer_id": "m.01p1v", 
                "aliases": [
                    "Republic of Chile"
                ]
            }, 
            {
                "answer": "Paraguay", 
                "answer_id": "m.05v10", 
                "aliases": [
                    "Corazon de America", 
                    "Heart of America", 
                    "Republic of Paraguay", 
                    "Coraz\u00f3n de Am\u00e9rica"
                ]
            }, 
            {
                "answer": "Uruguay", 
                "answer_id": "m.07twz", 
                "aliases": [
                    "Eastern Republic of the Uruguay", 
                    "Republic East of the Uruguay", 
                    "Eastern Republic of Uruguay", 
                    "Oriental Republic of Uruguay"
                ]
            }
        ], 
        "created": "2018-02-13T05:14:25"
    }, 
    {
        "ID": "WebQTest-1519_921d614e98cf80999ebe6ca1af0f4ef7", 
        "webqsp_ID": "WebQTest-1519", 
        "webqsp_question": "what continent is cayman islands located", 
        "machine_question": "what continent is cayman islands located and the location time zone is Hawaii-Aleutian Time Zone", 
        "question": "In what continent in the Hawaii-Aleutian Time Zone are the Cayman Islands located?", 
        "sparql": "PREFIX ns: <http://rdf.freebase.com/ns/>\nSELECT DISTINCT ?x\nWHERE {\nFILTER (?x != ns:m.01nty)\nFILTER (!isLiteral(?x) OR lang(?x) = '' OR langMatches(lang(?x), 'en'))\nns:m.01nty ns:location.location.containedby ?x .\n?x ns:common.topic.notable_types ns:m.01mh .\n?x ns:location.location.time_zones ns:m.02lctm . \n}", 
        "compositionality_type": "conjunction", 
        "answers": [
            {
                "answer": "North America", 
                "answer_id": "m.059g4", 
                "aliases": []
            }
        ], 
        "created": "2018-02-13T05:30:24"
    }, 
    {
        "ID": "WebQTrn-3471_5dd0eeca79ae03b7711252c032849eb2", 
        "webqsp_ID": "WebQTrn-3471", 
        "webqsp_question": "where do the baltimore ravens play", 
        "machine_question": "where do the the team has a team moscot named Rise play", 
        "question": "This team mascot is named Rise but where do they play?", 
        "sparql": "PREFIX ns: <http://rdf.freebase.com/ns/>\nSELECT DISTINCT ?x\nWHERE {\nFILTER (?x != ?c)\nFILTER (!isLiteral(?x) OR lang(?x) = '' OR langMatches(lang(?x), 'en'))\n?c ns:sports.sports_team.team_mascot ns:m.0nz45zc . \n?c ns:sports.sports_team.arena_stadium ?x .\n}\n", 
        "compositionality_type": "composition", 
        "answers": [
            {
                "answer": "M&T Bank Stadium", 
                "answer_id": "m.01yq7r", 
                "aliases": [
                    "M&T Bank Stadium, Baltimore"
                ]
            }
        ], 
        "created": "2018-02-13T02:00:42"
    }, 
    {
        "ID": "WebQTest-880_799804056310383bba960a7649b85b4f", 
        "webqsp_ID": "WebQTest-880", 
        "webqsp_question": "where did charles darwin die", 
        "machine_question": "where did the person who once lived in Downe, Kent die", 
        "question": "What location did the person die who once lived in Downe, Kent?", 
        "sparql": "PREFIX ns: <http://rdf.freebase.com/ns/>\nSELECT DISTINCT ?x\nWHERE {\nFILTER (?x != ?c)\nFILTER (!isLiteral(?x) OR lang(?x) = '' OR langMatches(lang(?x), 'en'))\n?c ns:people.person.places_lived ?k .\n?k ns:people.place_lived.location ns:m.030r7l4 . \n?c ns:people.deceased_person.place_of_death ?x .\n}\n", 
        "compositionality_type": "composition", 
        "answers": [
            {
                "answer": "Down House", 
                "answer_id": "m.02_675", 
                "aliases": []
            }
        ], 
        "created": "2018-02-13T04:20:59"
    }, 
    {
        "ID": "WebQTrn-1005_ec42fc1e16ded282a29e0441166755f4", 
        "webqsp_ID": "WebQTrn-1005", 
        "webqsp_question": "who is ruling tunisia now", 
        "machine_question": "who is ruling the location that appointed Mehdi Jomaa to govermental position now", 
        "question": "Who is the leader of the nation that appointed Mehdi Jomaa to the government position?", 
        "sparql": "PREFIX ns: <http://rdf.freebase.com/ns/>\nSELECT DISTINCT ?x\nWHERE {\nFILTER (?x != ?c)\nFILTER (!isLiteral(?x) OR lang(?x) = '' OR langMatches(lang(?x), 'en'))\n?c ns:government.governmental_jurisdiction.governing_officials ?k .\n?k ns:government.government_position_held.appointed_by ns:m.0zmqb17 . \n?c ns:government.governmental_jurisdiction.governing_officials ?y .\n?y ns:government.government_position_held.office_holder ?x .\n?y ns:government.government_position_held.basic_title ns:m.01zdtb .\nFILTER(NOT EXISTS {?y ns:government.government_position_held.from ?sk0} || \nEXISTS {?y ns:government.government_position_held.from ?sk1 . \nFILTER(xsd:datetime(?sk1) <= \"2015-08-10\"^^xsd:dateTime) })\nFILTER(NOT EXISTS {?y ns:government.government_position_held.to ?sk2} || \nEXISTS {?y ns:government.government_position_held.to ?sk3 . \nFILTER(xsd:datetime(?sk3) >= \"2015-08-10\"^^xsd:dateTime) })\n}\n", 
        "compositionality_type": "composition", 
        "answers": [
            {
                "answer": "Moncef Marzouki", 
                "answer_id": "m.0g9zy6b", 
                "aliases": []
            }
        ], 
        "created": "2018-02-12T21:30:34"
    }, 
    {
        "ID": "WebQTrn-616_243efcba3c612f9db3430115d3096acb", 
        "webqsp_ID": "WebQTrn-616", 
        "webqsp_question": "where did matt barnes play", 
        "machine_question": "where did matt barnes play and is the team won the 1980 NBA Finals championship", 
        "question": "What team that won the 1980 NBA Finals championship did Matt Barnes play for?", 
        "sparql": "PREFIX ns: <http://rdf.freebase.com/ns/>\nSELECT DISTINCT ?x\nWHERE {\nFILTER (?x != ns:m.07dr3v)\nFILTER (!isLiteral(?x) OR lang(?x) = '' OR langMatches(lang(?x), 'en'))\nns:m.07dr3v ns:sports.pro_athlete.teams ?y .\n?y ns:sports.sports_team_roster.team ?x .\n?x ns:sports.sports_team.championships ns:m.08x9_6 . \n}", 
        "compositionality_type": "conjunction", 
        "answers": [
            {
                "answer": "Los Angeles Lakers", 
                "answer_id": "m.0jmk7", 
                "aliases": [
                    "Lakeshow", 
                    "LA Lakers", 
                    "Showtime", 
                    "Lakers", 
                    "The Lakers", 
                    "Minneapolis Lakers"
                ]
            }
        ], 
        "created": "2018-02-12T20:48:04"
    }, 
    {
        "ID": "WebQTrn-3415_43af4daddf93f884aa6724b4a78111a1", 
        "webqsp_ID": "WebQTrn-3415", 
        "webqsp_question": "what country is the iberian peninsula located in", 
        "machine_question": "what country is the iberian peninsula located in and contains the wine regions that produces Lancers wine style", 
        "question": "What country has Iberaian Peninsula and the wine region that produces Lancers wine?", 
        "sparql": "PREFIX ns: <http://rdf.freebase.com/ns/>\nSELECT DISTINCT ?x\nWHERE {\nFILTER (?x != ns:m.03v9w)\nFILTER (!isLiteral(?x) OR lang(?x) = '' OR langMatches(lang(?x), 'en'))\nns:m.03v9w ns:location.location.partiallycontains ?y .\n?y ns:location.partial_containment_relationship.partially_contains ?x .\n?x ns:base.biblioness.bibs_location.loc_type ?sk0 .\nFILTER (str(?sk0) = \"Country\")\n?x ns:wine.wine_region.wine_styles ns:m.0c4r71 . \n}", 
        "compositionality_type": "conjunction", 
        "answers": [
            {
                "answer": "Portugal", 
                "answer_id": "m.05r4w", 
                "aliases": [
                    "Portuguese Republic"
                ]
            }
        ], 
        "created": "2018-02-13T01:53:36"
    }, 
    {
        "ID": "WebQTrn-2674_143c89d70679c3e5257c93d8e2bc4c67", 
        "webqsp_ID": "WebQTrn-2674", 
        "webqsp_question": "where is usc from", 
        "machine_question": "where is usc from and the location time zone is UTC\u00e2\u0088\u009205:00", 
        "question": "Where is USC from with a time zone of UTC-05:00?", 
        "sparql": "PREFIX ns: <http://rdf.freebase.com/ns/>\nSELECT DISTINCT ?x\nWHERE {\nFILTER (?x != ns:m.03tw2s)\nFILTER (!isLiteral(?x) OR lang(?x) = '' OR langMatches(lang(?x), 'en'))\nns:m.03tw2s ns:location.location.containedby ?x .\n?x ns:location.location.time_zones ns:m.02_37z . \n}", 
        "compositionality_type": "conjunction", 
        "answers": [
            {
                "answer": "South Carolina", 
                "answer_id": "m.06yxd", 
                "aliases": [
                    "SC", 
                    "Palmetto State"
                ]
            }
        ], 
        "created": "2018-02-13T00:25:17"
    }, 
    {
        "ID": "WebQTrn-515_6671d5347b1b3cfe482cf5894cc6a05a", 
        "webqsp_ID": "WebQTrn-515", 
        "webqsp_question": "who is the prime minister of ethiopia now", 
        "machine_question": "who is the prime minister of the currency used in the country is Ethiopian birr now", 
        "question": "In the country that uses the Ethiopian Birr, who is the current Prime Minister?", 
        "sparql": "PREFIX ns: <http://rdf.freebase.com/ns/>\nSELECT DISTINCT ?x\nWHERE {\nFILTER (?x != ?c)\nFILTER (!isLiteral(?x) OR lang(?x) = '' OR langMatches(lang(?x), 'en'))\n?c ns:location.country.currency_used ns:m.02_mbk . \n?c ns:government.governmental_jurisdiction.governing_officials ?y .\n?y ns:government.government_position_held.office_holder ?x .\n?y ns:government.government_position_held.basic_title ns:m.060bp .\nFILTER(NOT EXISTS {?y ns:government.government_position_held.from ?sk0} || \nEXISTS {?y ns:government.government_position_held.from ?sk1 . \nFILTER(xsd:datetime(?sk1) <= \"2015-08-10\"^^xsd:dateTime) })\nFILTER(NOT EXISTS {?y ns:government.government_position_held.to ?sk2} || \nEXISTS {?y ns:government.government_position_held.to ?sk3 . \nFILTER(xsd:datetime(?sk3) >= \"2015-08-10\"^^xsd:dateTime) })\n}\n", 
        "compositionality_type": "composition", 
        "answers": [
            {
                "answer": "Hailemariam Desalegn", 
                "answer_id": "m.0dl1t3", 
                "aliases": []
            }
        ], 
        "created": "2018-02-12T20:38:42"
    }, 
    {
        "ID": "WebQTest-903_d08336daa754523cf13934359b794632", 
        "webqsp_ID": "WebQTest-903", 
        "webqsp_question": "where turkish people originate", 
        "machine_question": "where turkish people originate and the country capital is Brussels", 
        "question": "From what country with a capital named Brussels do Turkish people originate?", 
        "sparql": "PREFIX ns: <http://rdf.freebase.com/ns/>\nSELECT DISTINCT ?x\nWHERE {\nFILTER (?x != ns:m.0hb7h_z)\nFILTER (!isLiteral(?x) OR lang(?x) = '' OR langMatches(lang(?x), 'en'))\nns:m.0hb7h_z ns:people.ethnicity.geographic_distribution ?x .\n?x ns:location.country.capital ns:m.0177z . \n}", 
        "compositionality_type": "conjunction", 
        "answers": [
            {
                "answer": "Belgium", 
                "answer_id": "m.0154j", 
                "aliases": [
                    "Belgique", 
                    "Belgi\u00eb", 
                    "Kingdom of Belgium"
                ]
            }
        ], 
        "created": "2018-02-13T04:22:39"
    }, 
    {
        "ID": "WebQTrn-2873_5e7f74da619ce156e47b43d581958ca8", 
        "webqsp_ID": "WebQTrn-2873", 
        "webqsp_question": "where does hector camacho live", 
        "machine_question": "where does the person notable with the medical condition Brain death live", 
        "question": "In which location did the person who is known for having the medical condition of brain death live?", 
        "sparql": "PREFIX ns: <http://rdf.freebase.com/ns/>\nSELECT DISTINCT ?x\nWHERE {\nFILTER (?x != ?c)\nFILTER (!isLiteral(?x) OR lang(?x) = '' OR langMatches(lang(?x), 'en'))\n?c ns:medicine.notable_person_with_medical_condition.condition ns:m.019m0c . \n?c ns:people.person.places_lived ?y .\n?y ns:people.place_lived.location ?x .\nFILTER(NOT EXISTS {?y ns:people.place_lived.end_date ?sk0} || \nEXISTS {?y ns:people.place_lived.end_date ?sk1 . \nFILTER(xsd:datetime(?sk1) >= \"2015-08-10\"^^xsd:dateTime) })\nFILTER(NOT EXISTS {?y ns:people.place_lived.start_date ?sk2} || \nEXISTS {?y ns:people.place_lived.start_date ?sk3 . \nFILTER(xsd:datetime(?sk3) <= \"2015-08-10\"^^xsd:dateTime) })\n}\n", 
        "compositionality_type": "composition", 
        "answers": [
            {
                "answer": "Manhattan", 
                "answer_id": "m.0cc56", 
                "aliases": [
                    "New York County"
                ]
            }, 
            {
                "answer": "Bayam\u00f3n", 
                "answer_id": "m.0l_0q", 
                "aliases": [
                    "Bayamon, Puerto Rico", 
                    "Bayam\u00f3n / Bayamon city", 
                    "Bayam\u00f3n, Puerto Rico"
                ]
            }
        ], 
        "created": "2018-02-13T00:49:15"
    }, 
    {
        "ID": "WebQTrn-290_91507a222b46ebe1609cabd19d941d48", 
        "webqsp_ID": "WebQTrn-290", 
        "webqsp_question": "what language they speak in taiwan", 
        "machine_question": "what language they speak in the country that contains Taipei", 
        "question": "What language is spoken in the country that has Taipei?", 
        "sparql": "PREFIX ns: <http://rdf.freebase.com/ns/>\nSELECT DISTINCT ?x\nWHERE {\nFILTER (?x != ?c)\nFILTER (!isLiteral(?x) OR lang(?x) = '' OR langMatches(lang(?x), 'en'))\n?c ns:location.country.administrative_divisions ns:m.0ftkx . \n?c ns:location.country.official_language ?x .\n}\n", 
        "compositionality_type": "composition", 
        "answers": [
            {
                "answer": "Standard Chinese", 
                "answer_id": "m.0653m", 
                "aliases": [
                    "Mandarin Chinese", 
                    "Beifang Fangyan", 
                    "Standard Chinese", 
                    "Putonghua", 
                    "Northern Chinese", 
                    "Guoyu", 
                    "Hui", 
                    "Guanhua", 
                    "Hytad", 
                    "Kuoyu", 
                    "Huayu", 
                    "Hanyu", 
                    "Chinese, Mandarin", 
                    "Qotong", 
                    "Mandarin", 
                    "Chinese, Mandarin Language", 
                    "Standard Mandarin", 
                    "Xui", 
                    "Hui-zu", 
                    "Hoton"
                ]
            }
        ], 
        "created": "2018-02-12T20:11:56"
    }, 
    {
        "ID": "WebQTest-819_031e56afa089a0f679104c73e0ea5126", 
        "webqsp_ID": "WebQTest-819", 
        "webqsp_question": "where was bin laden found and killed", 
        "machine_question": "where was the person education institution is Al-Thager Model School found and killed", 
        "question": "Where did the famous person who went to Al-Thager Model School get killed?", 
        "sparql": "PREFIX ns: <http://rdf.freebase.com/ns/>\nSELECT DISTINCT ?x\nWHERE {\nFILTER (?x != ?c)\nFILTER (!isLiteral(?x) OR lang(?x) = '' OR langMatches(lang(?x), 'en'))\n?c ns:people.person.education ?k .\n?k ns:education.education.institution ns:m.09qyqg . \n?c ns:people.deceased_person.place_of_death ?x .\n}\n", 
        "compositionality_type": "composition", 
        "answers": [
            {
                "answer": "Abbottabad", 
                "answer_id": "m.011hs1", 
                "aliases": [
                    "Abbottabad, Pakistan"
                ]
            }
        ], 
        "created": "2018-02-13T04:12:10"
    }, 
    {
        "ID": "WebQTest-1465_cb7256fc0312551734293d80792d8d90", 
        "webqsp_ID": "WebQTest-1465", 
        "webqsp_question": "what kind of government is south korea", 
        "machine_question": "what kind of government is the country that has the national anthem Aegukga", 
        "question": "Which type system of government does the country that has the national anthem, Aegukga, utilize?", 
        "sparql": "PREFIX ns: <http://rdf.freebase.com/ns/>\nSELECT DISTINCT ?x\nWHERE {\nFILTER (?x != ?c)\nFILTER (!isLiteral(?x) OR lang(?x) = '' OR langMatches(lang(?x), 'en'))\n?c ns:location.country.national_anthem ?k .\n?k ns:government.national_anthem_of_a_country.anthem ns:m.01jxqx . \n?c ns:location.country.form_of_government ?x .\n}\n", 
        "compositionality_type": "composition", 
        "answers": [
            {
                "answer": "Presidential system", 
                "answer_id": "m.01d9r3", 
                "aliases": [
                    "Presidential"
                ]
            }, 
            {
                "answer": "Unitary state", 
                "answer_id": "m.01fpfn", 
                "aliases": [
                    "Unitary republic", 
                    "Unitary"
                ]
            }, 
            {
                "answer": "Constitutional republic", 
                "answer_id": "m.0c9rw5", 
                "aliases": [
                    "Constitutional"
                ]
            }
        ], 
        "created": "2018-02-13T05:24:26"
    }, 
    {
        "ID": "WebQTrn-908_6f75d472ef014a386190f71eb1ea2456", 
        "webqsp_ID": "WebQTrn-908", 
        "webqsp_question": "who is james dean", 
        "machine_question": "who is the person who once lived in Fairmount", 
        "question": "The person who once lived in Fairmount is whom?", 
        "sparql": "PREFIX ns: <http://rdf.freebase.com/ns/>\nSELECT DISTINCT ?x\nWHERE {\nFILTER (?x != ?c)\nFILTER (!isLiteral(?x) OR lang(?x) = '' OR langMatches(lang(?x), 'en'))\n?c ns:people.person.places_lived ?k .\n?k ns:people.place_lived.location ns:m.031j2 . \n?c ns:people.person.profession ?x .\n}\n", 
        "compositionality_type": "composition", 
        "answers": [
            {
                "answer": "Actor", 
                "answer_id": "m.02hrh1q", 
                "aliases": [
                    "Film actress", 
                    "Movie actress", 
                    "Movie actor", 
                    "Actress", 
                    "Film actor", 
                    "Theatre Actor"
                ]
            }
        ], 
        "created": "2018-02-12T21:19:48"
    }, 
    {
        "ID": "WebQTrn-237_365a098580db25b4bb178c4ed81bd460", 
        "webqsp_ID": "WebQTrn-237", 
        "webqsp_question": "what is the name of the pittsburgh steelers head coach", 
        "machine_question": "what is the name of the the team won the 2009 AFC Championship Game championship head coach", 
        "question": "Who is the head coach of the team that won 2009 AFC Championship Game?", 
        "sparql": "PREFIX ns: <http://rdf.freebase.com/ns/>\nSELECT DISTINCT ?x\nWHERE {\nFILTER (?x != ?c)\nFILTER (!isLiteral(?x) OR lang(?x) = '' OR langMatches(lang(?x), 'en'))\n?c ns:sports.sports_team.championships ns:m.0_gt_lv . \n?c ns:american_football.football_team.current_head_coach ?x .\n}\n", 
        "compositionality_type": "composition", 
        "answers": [
            {
                "answer": "Mike Tomlin", 
                "answer_id": "m.0c5f_j", 
                "aliases": [
                    "Michael Tomlin", 
                    "Michael Pettaway Tomlin"
                ]
            }
        ], 
        "created": "2018-02-12T20:05:24"
    }, 
    {
        "ID": "WebQTest-1562_43af4daddf93f884aa6724b4a78111a1", 
        "webqsp_ID": "WebQTest-1562", 
        "webqsp_question": "what countries constitute the eu", 
        "machine_question": "what countries constitute the eu and contains the wine regions that produces Lancers wine style", 
        "question": "What country produces Lancers Wine and also constitutes the EU?", 
        "sparql": "PREFIX ns: <http://rdf.freebase.com/ns/>\nSELECT DISTINCT ?x\nWHERE {\nFILTER (?x != ns:m.0_6t_z8)\nFILTER (!isLiteral(?x) OR lang(?x) = '' OR langMatches(lang(?x), 'en'))\nns:m.0_6t_z8 ns:organization.membership_organization.members ?y .\n?y ns:organization.organization_membership.member ?x .\n?x ns:wine.wine_region.wine_styles ns:m.0c4r71 . \n}", 
        "compositionality_type": "conjunction", 
        "answers": [
            {
                "answer": "Portugal", 
                "answer_id": "m.05r4w", 
                "aliases": [
                    "Portuguese Republic"
                ]
            }
        ], 
        "created": "2018-02-13T05:34:47"
    }, 
    {
        "ID": "WebQTest-937_8c6b952c6bd963f0ece4e401c9eb731a", 
        "webqsp_ID": "WebQTest-937", 
        "webqsp_question": "where are people who speak arabic from", 
        "machine_question": "where are people who speak arabic from and the location time zone is Central Time Zone", 
        "question": "Where do people in the Central Time Zone speak Arabic?", 
        "sparql": "PREFIX ns: <http://rdf.freebase.com/ns/>\nSELECT DISTINCT ?x\nWHERE {\nFILTER (?x != ns:m.0jzc)\nFILTER (!isLiteral(?x) OR lang(?x) = '' OR langMatches(lang(?x), 'en'))\nns:m.0jzc ns:language.human_language.countries_spoken_in ?x .\n?x ns:location.location.time_zones ns:m.02fqwt . \n}", 
        "compositionality_type": "conjunction", 
        "answers": [
            {
                "answer": "Canada", 
                "answer_id": "m.0d060g", 
                "aliases": [
                    "Dominion of Canada", 
                    "Canuckistan"
                ]
            }
        ], 
        "created": "2018-02-13T04:26:13"
    }, 
    {
        "ID": "WebQTest-166_e04d0ee5dcbfd8b2dbb1e8be247e94d4", 
        "webqsp_ID": "WebQTest-166", 
        "webqsp_question": "what was dr seuss education", 
        "machine_question": "what was dr seuss education and is the education institution has a sports team named Oxford University RFC", 
        "question": "What educational institution with sports team named Oxford University RFC did Dr. Seuss attend?", 
        "sparql": "PREFIX ns: <http://rdf.freebase.com/ns/>\nSELECT DISTINCT ?x\nWHERE {\nFILTER (?x != ns:m.02g3w)\nFILTER (!isLiteral(?x) OR lang(?x) = '' OR langMatches(lang(?x), 'en'))\nns:m.02g3w ns:people.person.education ?y .\n?y ns:education.education.institution ?x .\n?x ns:education.educational_institution.sports_teams ns:m.02677jr . \n}", 
        "compositionality_type": "conjunction", 
        "answers": [
            {
                "answer": "University of Oxford", 
                "answer_id": "m.07tgn", 
                "aliases": [
                    "Universitas Oxoniensis", 
                    "Oxford University"
                ]
            }
        ], 
        "created": "2018-02-13T02:52:28"
    }, 
    {
        "ID": "WebQTrn-788_ab012899814ed13db2f1cc0fc3058060", 
        "webqsp_ID": "WebQTrn-788", 
        "webqsp_question": "what clubs has peter crouch played for", 
        "machine_question": "what clubs has peter crouch played for and is the team won the 2001 Football League Cup Final championship", 
        "question": "What club did Peter Crouch play for that won the 2001 Football League Cup Final championship?", 
        "sparql": "PREFIX ns: <http://rdf.freebase.com/ns/>\nSELECT DISTINCT ?x\nWHERE {\nFILTER (?x != ns:m.03y5_6)\nFILTER (!isLiteral(?x) OR lang(?x) = '' OR langMatches(lang(?x), 'en'))\nns:m.03y5_6 ns:sports.pro_athlete.teams ?y .\n?y ns:sports.sports_team_roster.team ?x .\n?x ns:sports.sports_team.championships ns:m.025_tz5 . \n}", 
        "compositionality_type": "conjunction", 
        "answers": [
            {
                "answer": "Liverpool F.C.", 
                "answer_id": "m.04ltf", 
                "aliases": [
                    "The Reds", 
                    "Liverpool FC", 
                    "Liverpool", 
                    "Liverpool Football Club"
                ]
            }
        ], 
        "created": "2018-02-12T21:01:41"
    }, 
    {
        "ID": "WebQTrn-790_84cb4e31dd8c9c5ea25973aa4c712f04", 
        "webqsp_ID": "WebQTrn-790", 
        "webqsp_question": "what team does lamar odom play for 2011", 
        "machine_question": "what team does lamar odom play for 2011 and the basket ball team head coach is Byron Scott", 
        "question": "What basketball team coached by Byron Scott did Lamar Odom played for in 2011?", 
        "sparql": "PREFIX ns: <http://rdf.freebase.com/ns/>\nSELECT DISTINCT ?x\nWHERE {\nFILTER (?x != ns:m.02_nkp)\nFILTER (!isLiteral(?x) OR lang(?x) = '' OR langMatches(lang(?x), 'en'))\nns:m.02_nkp ns:sports.pro_athlete.teams ?y .\n?y ns:sports.sports_team_roster.team ?x .\nFILTER(NOT EXISTS {?y ns:sports.sports_team_roster.from ?sk0} || \nEXISTS {?y ns:sports.sports_team_roster.from ?sk1 . \nFILTER(xsd:datetime(?sk1) <= \"2011-12-31\"^^xsd:dateTime) })\nFILTER(NOT EXISTS {?y ns:sports.sports_team_roster.to ?sk2} || \nEXISTS {?y ns:sports.sports_team_roster.to ?sk3 . \nFILTER(xsd:datetime(?sk3) >= \"2011-01-01\"^^xsd:dateTime) })\n?x ns:basketball.basketball_team.head_coach ns:m.05jdzr . \n}", 
        "compositionality_type": "conjunction", 
        "answers": [
            {
                "answer": "Los Angeles Lakers", 
                "answer_id": "m.0jmk7", 
                "aliases": [
                    "Lakeshow", 
                    "LA Lakers", 
                    "Showtime", 
                    "Lakers", 
                    "The Lakers", 
                    "Minneapolis Lakers"
                ]
            }
        ], 
        "created": "2018-02-12T21:01:42"
    }, 
    {
        "ID": "WebQTest-352_adb986327c16050a6ce17faf5fca7812", 
        "webqsp_ID": "WebQTest-352", 
        "webqsp_question": "what did albert speer design", 
        "machine_question": "what did albert speer design and is the structure construction started in 1938", 
        "question": "What structure on which construction began in 1938 was designed by Albert Speer?", 
        "sparql": "PREFIX ns: <http://rdf.freebase.com/ns/>\nSELECT DISTINCT ?x\nWHERE {\nFILTER (?x != ns:m.0l4t)\nFILTER (!isLiteral(?x) OR lang(?x) = '' OR langMatches(lang(?x), 'en'))\nns:m.0l4t ns:architecture.architect.structures_designed ?x .\n?x ns:architecture.structure.construction_started \"1938\"^^xsd:dateTime . \n}", 
        "compositionality_type": "conjunction", 
        "answers": [
            {
                "answer": "Reich Chancellery", 
                "answer_id": "m.04j99j", 
                "aliases": [
                    "Reich Chancellery, Berlin"
                ]
            }
        ], 
        "created": "2018-02-13T03:21:38"
    }, 
    {
        "ID": "WebQTest-1458_a1066c791c081a77c3fd36e526b0ba52", 
        "webqsp_ID": "WebQTest-1458", 
        "webqsp_question": "who owns chrysler corporation 2011", 
        "machine_question": "who owns the child organization is Envi 2011", 
        "question": "Who owned Envi  in 2011?", 
        "sparql": "PREFIX ns: <http://rdf.freebase.com/ns/>\nSELECT DISTINCT ?x\nWHERE {\nFILTER (?x != ?c)\nFILTER (!isLiteral(?x) OR lang(?x) = '' OR langMatches(lang(?x), 'en'))\n?c ns:organization.organization.child ?k .\n?k ns:organization.organization_relationship.child ns:m.03b_br1 . \n?c ns:organization.organization.parent ?y .\n?y ns:organization.organization_relationship.parent ?x .\nFILTER(NOT EXISTS {?y ns:organization.organization_relationship.to ?sk0} || \nEXISTS {?y ns:organization.organization_relationship.to ?sk1 . \nFILTER(xsd:datetime(?sk1) >= \"2011-01-01\"^^xsd:dateTime) })\nFILTER(NOT EXISTS {?y ns:organization.organization_relationship.from ?sk2} || \nEXISTS {?y ns:organization.organization_relationship.from ?sk3 . \nFILTER(xsd:datetime(?sk3) <= \"2011-12-31\"^^xsd:dateTime) })\n}\n", 
        "compositionality_type": "composition", 
        "answers": [
            {
                "answer": "Fiat Chrysler Automobiles", 
                "answer_id": "m.0_gywj9", 
                "aliases": []
            }, 
            {
                "answer": "Federal government of the United States", 
                "answer_id": "m.01bqks", 
                "aliases": [
                    "U.S. government", 
                    "managing organization for the United States", 
                    "US Government", 
                    "American Government", 
                    "the United States's government", 
                    "United States: Federal Government", 
                    "United States", 
                    "US Federal government", 
                    "Federal Government", 
                    "United States government", 
                    "United States Federal Government"
                ]
            }, 
            {
                "answer": "Government of Canada", 
                "answer_id": "m.02wz7x", 
                "aliases": [
                    "Canada", 
                    "Canadian government"
                ]
            }, 
            {
                "answer": "Voluntary Employee Beneficiary Association", 
                "answer_id": "m.03c40gm", 
                "aliases": []
            }, 
            {
                "answer": "Fiat S.p.A.", 
                "answer_id": "m.0c7mv", 
                "aliases": [
                    "Societ\u00e0 Anonima Fabbrica Italiana Automobili Torino", 
                    "Fiat SpA", 
                    "Fabbrica Italiana Automobili Torino", 
                    "Fiat S.p.A."
                ]
            }
        ], 
        "created": "2018-02-13T05:22:49"
    }, 
    {
        "ID": "WebQTrn-1303_9f4e223ee039ce1799510374ffe59428", 
        "webqsp_ID": "WebQTrn-1303", 
        "webqsp_question": "what is the name of book written by helen keller", 
        "machine_question": "what is the name of book written by the person education institution is Wright-Humason School for the Deaf", 
        "question": "What are the titles of the books written by a notable person who was educated at the Wright-Humason School for the Deaf?", 
        "sparql": "PREFIX ns: <http://rdf.freebase.com/ns/>\nSELECT DISTINCT ?x\nWHERE {\nFILTER (?x != ?c)\nFILTER (!isLiteral(?x) OR lang(?x) = '' OR langMatches(lang(?x), 'en'))\n?c ns:people.person.education ?k .\n?k ns:education.education.institution ns:m.07tr9z . \n?c ns:book.author.works_written ?x .\n?x ns:common.topic.notable_types ns:m.01xryvm .\n}\n", 
        "compositionality_type": "composition", 
        "answers": [
            {
                "answer": "Light in My Darkness", 
                "answer_id": "m.01ct51", 
                "aliases": [
                    "My religion"
                ]
            }, 
            {
                "answer": "The World I Live In", 
                "answer_id": "m.05mms2v", 
                "aliases": []
            }, 
            {
                "answer": "Let us have faith", 
                "answer_id": "m.068vwb6", 
                "aliases": []
            }, 
            {
                "answer": "The open door", 
                "answer_id": "m.06clt38", 
                "aliases": []
            }, 
            {
                "answer": "Peace at eventide", 
                "answer_id": "m.06ct5x4", 
                "aliases": []
            }, 
            {
                "answer": "Helen Keller, her Socialist years", 
                "answer_id": "m.06d40b6", 
                "aliases": []
            }, 
            {
                "answer": "We bereaved", 
                "answer_id": "m.06gm4jn", 
                "aliases": []
            }, 
            {
                "answer": "The faith of Helen Keller", 
                "answer_id": "m.06jh36g", 
                "aliases": []
            }, 
            {
                "answer": "The miracle of life", 
                "answer_id": "m.06l8ytp", 
                "aliases": []
            }, 
            {
                "answer": "Teacher: Anne Sullivan Macy", 
                "answer_id": "m.06qbwkz", 
                "aliases": [
                    "Teacher"
                ]
            }, 
            {
                "answer": "My key of life", 
                "answer_id": "m.06vdh41", 
                "aliases": []
            }, 
            {
                "answer": "The modern woman", 
                "answer_id": "m.0c1t3s9", 
                "aliases": []
            }, 
            {
                "answer": "Optimism", 
                "answer_id": "m.0c1t3sh", 
                "aliases": []
            }, 
            {
                "answer": "Out of the dark", 
                "answer_id": "m.0c1t3sl", 
                "aliases": []
            }, 
            {
                "answer": "The song of the stone wall", 
                "answer_id": "m.0c1t3sp", 
                "aliases": [
                    "The chant of the stone wall"
                ]
            }, 
            {
                "answer": "The Story of My Life", 
                "answer_id": "m.0d4wd9", 
                "aliases": [
                    "The story of my life, with her letters (1887-1901) and a supplementary account of her education"
                ]
            }
        ], 
        "created": "2018-02-12T22:03:13"
    }, 
    {
        "ID": "WebQTrn-1632_9c58d0ae4267f35c30a044efe2298c6e", 
        "webqsp_ID": "WebQTrn-1632", 
        "webqsp_question": "what to see in staten island new york", 
        "machine_question": "what to see in staten island new york and is the zoo that opened on 1936-06-10", 
        "question": "What is there to see in Staten Island, New York that is a zoo that opened on June 10,1936?", 
        "sparql": "PREFIX ns: <http://rdf.freebase.com/ns/>\nSELECT DISTINCT ?x\nWHERE {\nFILTER (?x != ns:m.0y62n)\nFILTER (!isLiteral(?x) OR lang(?x) = '' OR langMatches(lang(?x), 'en'))\nns:m.0y62n ns:travel.travel_destination.tourist_attractions ?x .\n?x ns:zoos.zoo.opened \"1936-06-10\"^^xsd:dateTime . \n}", 
        "compositionality_type": "conjunction", 
        "answers": [
            {
                "answer": "Staten Island Zoo", 
                "answer_id": "m.02zw2b", 
                "aliases": []
            }
        ], 
        "created": "2018-02-12T22:38:22"
    }, 
    {
        "ID": "WebQTest-335_e185ea716e0dcbdf8d9ad6498b5e88f1", 
        "webqsp_ID": "WebQTest-335", 
        "webqsp_question": "what type of money to take to cuba", 
        "machine_question": "what type of money to take to the currency used in the country is Cuban convertible peso", 
        "question": "What is the currency used in the country with the Cuban Convertible Peso?", 
        "sparql": "PREFIX ns: <http://rdf.freebase.com/ns/>\nSELECT DISTINCT ?x\nWHERE {\nFILTER (?x != ?c)\nFILTER (!isLiteral(?x) OR lang(?x) = '' OR langMatches(lang(?x), 'en'))\n?c ns:location.country.currency_used ns:m.049p6c . \n?c ns:location.country.currency_used ?x .\n}\n", 
        "compositionality_type": "composition", 
        "answers": [
            {
                "answer": "Cuban peso", 
                "answer_id": "m.049p2z", 
                "aliases": []
            }, 
            {
                "answer": "Cuban convertible peso", 
                "answer_id": "m.049p6c", 
                "aliases": [
                    "Chavito"
                ]
            }
        ], 
        "created": "2018-02-13T03:18:38"
    }, 
    {
        "ID": "WebQTrn-1691_44d67b357829d662abe1c6dc637e219d", 
        "webqsp_ID": "WebQTrn-1691", 
        "webqsp_question": "what is the government of chile", 
        "machine_question": "what is the government of the country capital is Santiago", 
        "question": "The country with the capital of Santiago has what type of government?", 
        "sparql": "PREFIX ns: <http://rdf.freebase.com/ns/>\nSELECT DISTINCT ?x\nWHERE {\nFILTER (?x != ?c)\nFILTER (!isLiteral(?x) OR lang(?x) = '' OR langMatches(lang(?x), 'en'))\n?c ns:location.country.capital ns:m.0dlqv . \n?c ns:location.country.form_of_government ?x .\n}\n", 
        "compositionality_type": "composition", 
        "answers": [
            {
                "answer": "Presidential system", 
                "answer_id": "m.01d9r3", 
                "aliases": [
                    "Presidential"
                ]
            }, 
            {
                "answer": "Unitary state", 
                "answer_id": "m.01fpfn", 
                "aliases": [
                    "Unitary republic", 
                    "Unitary"
                ]
            }, 
            {
                "answer": "Constitutional republic", 
                "answer_id": "m.0c9rw5", 
                "aliases": [
                    "Constitutional"
                ]
            }, 
            {
                "answer": "Democratic republic", 
                "answer_id": "m.0fpgmpz", 
                "aliases": [
                    "Democratic"
                ]
            }
        ], 
        "created": "2018-02-12T22:43:04"
    }, 
    {
        "ID": "WebQTrn-157_7918a7c36c21724d9786a467d6c24e78", 
        "webqsp_ID": "WebQTrn-157", 
        "webqsp_question": "who was elected president of the philippines", 
        "machine_question": "who was elected president of the the country that contains Southern Leyte", 
        "question": "Who were the presidents of the country that has Southern Leyte?", 
        "sparql": "PREFIX ns: <http://rdf.freebase.com/ns/>\nSELECT DISTINCT ?x\nWHERE {\nFILTER (?x != ?c)\nFILTER (!isLiteral(?x) OR lang(?x) = '' OR langMatches(lang(?x), 'en'))\n?c ns:location.country.administrative_divisions ns:m.01kn62 . \n?c ns:government.governmental_jurisdiction.governing_officials ?y .\n?y ns:government.government_position_held.office_holder ?x .\n?y ns:government.government_position_held.basic_title ns:m.060c4 .\n}\n", 
        "compositionality_type": "composition", 
        "answers": [
            {
                "answer": "Ferdinand Marcos", 
                "answer_id": "m.011_7j", 
                "aliases": [
                    "Ferdinand Emmanuel Edralin Marcos", 
                    "Ferdinand Emmanuel Edralin Marcos, Sr.", 
                    "Ferdinand E. Marcos", 
                    "Ferdinand Edralin Marcos"
                ]
            }, 
            {
                "answer": "Emilio Aguinaldo", 
                "answer_id": "m.0126_k", 
                "aliases": [
                    "Emilio Aguinaldo y Famy"
                ]
            }, 
            {
                "answer": "Manuel L. Quezon", 
                "answer_id": "m.015865", 
                "aliases": [
                    "Manuel Luis Quez\u00f3n y Molina"
                ]
            }, 
            {
                "answer": "Gloria Macapagal-Arroyo", 
                "answer_id": "m.01b1g9", 
                "aliases": [
                    "\u30b0\u30ed\u30ea\u30a2\u30fb\u30de\u30ab\u30ec\u30a4\u30b0\u30fb\u30de\u30ab\u30d1\u30ac\u30eb\uff1d\u30a2\u30ed\u30e8", 
                    "Maria Gloria Macaraeg Macapagal"
                ]
            }, 
            {
                "answer": "Corazon Aquino", 
                "answer_id": "m.01pmpq", 
                "aliases": [
                    "Mar\u00eda Coraz\u00f3n \"Cory\" Sumulong Cojuangco", 
                    "Mar\u00eda Coraz\u00f3n Sumulong Cojuangco-Aquino", 
                    "Tita Cory (Aunt Cory)", 
                    "Maria Corazon Sumulong \"Cory\" Cojuangco-Aquino", 
                    "Maria Corazon Aquino", 
                    "Mar\u00eda Coraz\u00f3n Sumulong Cojuangco", 
                    "Corazon C. Aquino", 
                    "Cory Aquino", 
                    "The Mother of Philippine Democracy", 
                    "Cory"
                ]
            }, 
            {
                "answer": "Joseph Estrada", 
                "answer_id": "m.01pmsf", 
                "aliases": [
                    "Filipino Ronald Reagan", 
                    "Jose Marcelo Ejercito", 
                    "Jose Ejercito", 
                    "Joseph \"Erap\" Ejercito Estrada", 
                    "Erap", 
                    "Joseph Ejercito Estrada"
                ]
            }, 
            {
                "answer": "Benigno \\\"Noynoy\\\" Aquino III", 
                "answer_id": "m.01pmvy", 
                "aliases": []
            }, 
            {
                "answer": "Fidel V. Ramos", 
                "answer_id": "m.02193z", 
                "aliases": [
                    "\u30d5\u30a3\u30c7\u30eb\u30fb\u30d0\u30eb\u30c7\u30b9\u30fb\u30e9\u30e2\u30b9", 
                    "Presidency of Fidel V. Ramos", 
                    "Presidency of Fidel Ramos", 
                    "Fidel Ramos"
                ]
            }, 
            {
                "answer": "Ramon Magsaysay", 
                "answer_id": "m.022llj", 
                "aliases": [
                    "Ram\u00f3n \"Monching\" Magsaysay", 
                    "Ram\u00f3n del Fierro Magsaysay"
                ]
            }, 
            {
                "answer": "Elpidio Quirino", 
                "answer_id": "m.02bmxs", 
                "aliases": []
            }, 
            {
                "answer": "Sergio Osme\u00f1a", 
                "answer_id": "m.02j7d8", 
                "aliases": [
                    "Sergio Osmena"
                ]
            }, 
            {
                "answer": "Jos\u00e9 P. Laurel", 
                "answer_id": "m.02kmg9", 
                "aliases": [
                    "Jose Laurel"
                ]
            }, 
            {
                "answer": "Diosdado Macapagal", 
                "answer_id": "m.02qkny", 
                "aliases": []
            }, 
            {
                "answer": "Manuel Roxas", 
                "answer_id": "m.037ylm", 
                "aliases": [
                    "Manuel Acu\u00f1a Roxas"
                ]
            }, 
            {
                "answer": "Carlos P. Garcia", 
                "answer_id": "m.03pnzp", 
                "aliases": [
                    "Carlos P. Garc\u00eda", 
                    "Carlos Garcia", 
                    "Prince of Visayan Poets", 
                    "Bard from Bohol", 
                    "Carlos Polistico Garc\u00eda"
                ]
            }
        ], 
        "created": "2018-02-12T19:52:53"
    }, 
    {
        "ID": "WebQTrn-794_3e09b108c3448248556d4c34acae3cf7", 
        "webqsp_ID": "WebQTrn-794", 
        "webqsp_question": "where is the syracuse university", 
        "machine_question": "where is the the organiztion leadership has a person named Eric F. Spina", 
        "question": "Where is the headquarters of the organization led by Eric F. Spina?", 
        "sparql": "PREFIX ns: <http://rdf.freebase.com/ns/>\nSELECT DISTINCT ?x\nWHERE {\nFILTER (?x != ?c)\nFILTER (!isLiteral(?x) OR lang(?x) = '' OR langMatches(lang(?x), 'en'))\n?c ns:organization.organization.leadership ?k .\n?k ns:organization.leadership.person ns:m.0zsryt0 . \n?c ns:location.location.containedby ?x .\n}\n", 
        "compositionality_type": "composition", 
        "answers": [
            {
                "answer": "New York", 
                "answer_id": "m.059rby", 
                "aliases": [
                    "NY", 
                    "New York State", 
                    "The Empire State"
                ]
            }, 
            {
                "answer": "Syracuse", 
                "answer_id": "m.071cn", 
                "aliases": [
                    "Onondaga County / Syracuse city", 
                    "Syracuse, New York", 
                    "Syracuse NY"
                ]
            }, 
            {
                "answer": "United States of America", 
                "answer_id": "m.09c7w0", 
                "aliases": [
                    "U.S. of A.", 
                    "Estats Units d'Am\u00e8rica", 
                    "USA", 
                    "U.S.A.", 
                    "U.S.", 
                    "The States", 
                    "US", 
                    "United States", 
                    "America"
                ]
            }
        ], 
        "created": "2018-02-12T21:02:02"
    }, 
    {
        "ID": "WebQTest-1256_a81fac2cf968f0a4b1e647e87f8fa67e", 
        "webqsp_ID": "WebQTest-1256", 
        "webqsp_question": "who did terrell owens play for in 2010", 
        "machine_question": "who did terrell owens play for in 2010 and the sports team owner is Mike Brown", 
        "question": "Who did Terrell Owens play for in 2010, where the sports team owner is Mike Brown?", 
        "sparql": "PREFIX ns: <http://rdf.freebase.com/ns/>\nSELECT DISTINCT ?x\nWHERE {\nFILTER (?x != ns:m.027ddp)\nFILTER (!isLiteral(?x) OR lang(?x) = '' OR langMatches(lang(?x), 'en'))\nns:m.027ddp ns:sports.pro_athlete.teams ?y .\n?y ns:sports.sports_team_roster.team ?x .\nFILTER(NOT EXISTS {?y ns:sports.sports_team_roster.from ?sk0} || \nEXISTS {?y ns:sports.sports_team_roster.from ?sk1 . \nFILTER(xsd:datetime(?sk1) <= \"2010-12-31\"^^xsd:dateTime) })\nFILTER(NOT EXISTS {?y ns:sports.sports_team_roster.to ?sk2} || \nEXISTS {?y ns:sports.sports_team_roster.to ?sk3 . \nFILTER(xsd:datetime(?sk3) >= \"2010-01-01\"^^xsd:dateTime) })\n?x ns:sports.professional_sports_team.owner_s ns:m.0c612b . \n}", 
        "compositionality_type": "conjunction", 
        "answers": [
            {
                "answer": "Cincinnati Bengals", 
                "answer_id": "m.01y49", 
                "aliases": []
            }
        ], 
        "created": "2018-02-13T04:57:13"
    }, 
    {
        "ID": "WebQTrn-635_494bc83a0c8f26abb77ee748ad57284b", 
        "webqsp_ID": "WebQTrn-635", 
        "webqsp_question": "what team did grover cleveland alexander play for", 
        "machine_question": "what team did grover cleveland alexander play for and is the team won the 2008 World Series championship", 
        "question": "What team did Grover Cleveland Alexander play for and won the World Series in 2008?", 
        "sparql": "PREFIX ns: <http://rdf.freebase.com/ns/>\nSELECT DISTINCT ?x\nWHERE {\nFILTER (?x != ns:m.01zt27)\nFILTER (!isLiteral(?x) OR lang(?x) = '' OR langMatches(lang(?x), 'en'))\nns:m.01zt27 ns:baseball.baseball_player.batting_stats ?y .\n?y ns:baseball.batting_statistics.team ?x .\n?x ns:sports.sports_team.championships ns:m.03ckf3v . \n}", 
        "compositionality_type": "conjunction", 
        "answers": [
            {
                "answer": "Philadelphia Phillies", 
                "answer_id": "m.05xvj", 
                "aliases": [
                    "Phillies", 
                    "Fighting Phils"
                ]
            }
        ], 
        "created": "2018-02-12T20:50:34"
    }, 
    {
        "ID": "WebQTrn-1887_6e9bdd13cf26c4cc7b9e2263fa13f957", 
        "webqsp_ID": "WebQTrn-1887", 
        "webqsp_question": "what sports do canadians like", 
        "machine_question": "what sports do canadians like and is the team won the 1931 World Ice Hockey Championships championship", 
        "question": "What sport do Canadians like that won the 1931 World Ice Hockey Championship?", 
        "sparql": "PREFIX ns: <http://rdf.freebase.com/ns/>\nSELECT DISTINCT ?x\nWHERE {\nFILTER (?x != ns:m.0d060g)\nFILTER (!isLiteral(?x) OR lang(?x) = '' OR langMatches(lang(?x), 'en'))\nns:m.0d060g ns:sports.sports_team_location.teams ?x .\n?x ns:sports.sports_team.championships ns:m.0274b40 . \n}", 
        "compositionality_type": "conjunction", 
        "answers": [
            {
                "answer": "Canadian National Men's Hockey Team", 
                "answer_id": "m.037qf6", 
                "aliases": [
                    "Canadian Ice Hockey Team", 
                    "Canada National Men's Hockey Team", 
                    "Canada Ice Hockey Team"
                ]
            }
        ], 
        "created": "2018-02-12T23:02:36"
    }, 
    {
        "ID": "WebQTest-1144_471b83eade9707a4dba68e201bf29d73", 
        "webqsp_ID": "WebQTest-1144", 
        "webqsp_question": "what are the major trading partners of germany", 
        "machine_question": "what are the major trading partners of germany and the location time zone is Greenwich Mean Time Zone", 
        "question": "Which one of Germany's major trading partners in Europe shares the Greenwich Mean Time Zone?", 
        "sparql": "#MANUAL SPARQL\nPREFIX ns: <http://rdf.freebase.com/ns/>\nSELECT DISTINCT ?x \nWHERE {\n\tFILTER (?x != ns:m.0345h)\n\t{ \n\t  ns:m.0345h ns:location.statistical_region.places_exported_to ?y .\n\t  ?y ns:location.imports_and_exports.exported_to ?x . \n\t}\n\tUNION\n\t{\n\t  ns:m.0345h ns:location.statistical_region.places_imported_from ?y .\n\t  ?y ns:location.imports_and_exports.imported_from ?x . \n\t}?x ns:location.location.time_zones ns:m.03bdv . \n}", 
        "compositionality_type": "conjunction", 
        "answers": [
            {
                "answer": "Scotland", 
                "answer_id": "m.06q1r", 
                "aliases": [
                    "Scotia"
                ]
            }
        ], 
        "created": "2018-02-13T04:48:29"
    }, 
    {
        "ID": "WebQTrn-555_048afa751894ba3400587301a9e1cc7a", 
        "webqsp_ID": "WebQTrn-555", 
        "webqsp_question": "when michael jordan got drafted", 
        "machine_question": "when the person education institution is Emsley A. Laney High School got drafted", 
        "question": "When did the notable person who learned at the educational institution of Emsley A. Laney High School get drafted?", 
        "sparql": "PREFIX ns: <http://rdf.freebase.com/ns/>\nSELECT DISTINCT ?x\nWHERE {\nFILTER (?x != ?c)\nFILTER (!isLiteral(?x) OR lang(?x) = '' OR langMatches(lang(?x), 'en'))\n?c ns:people.person.education ?k .\n?k ns:education.education.institution ns:m.07qymj . \n?c ns:sports.drafted_athlete.drafted ?y .\n?y ns:sports.sports_league_draft_pick.draft ?x .\n}\n", 
        "compositionality_type": "composition", 
        "answers": [
            {
                "answer": "1984 NBA draft", 
                "answer_id": "m.06jncs", 
                "aliases": []
            }
        ], 
        "created": "2018-02-12T20:43:05"
    }, 
    {
        "ID": "WebQTest-1892_0e9d32b91aee2b2625672f6bbbec2a5d", 
        "webqsp_ID": "WebQTest-1892", 
        "webqsp_question": "what year did the la kings win the cup", 
        "machine_question": "what year did the the sports team owner is Philip Anschutz win the cup", 
        "question": "What year did the team owned by Phillip Anschutz win the cup?", 
        "sparql": "PREFIX ns: <http://rdf.freebase.com/ns/>\nSELECT DISTINCT ?x\nWHERE {\nFILTER (?x != ?c)\nFILTER (!isLiteral(?x) OR lang(?x) = '' OR langMatches(lang(?x), 'en'))\n?c ns:sports.professional_sports_team.owner_s ns:m.02fzwl . \n?c ns:sports.sports_team.championships ?x .\n}\n", 
        "compositionality_type": "composition", 
        "answers": [
            {
                "answer": "2014 Stanley Cup Finals", 
                "answer_id": "m.010fdzhp", 
                "aliases": []
            }, 
            {
                "answer": "2012 Stanley Cup Finals", 
                "answer_id": "m.0jt52pz", 
                "aliases": []
            }
        ], 
        "created": "2018-02-13T06:16:08"
    }, 
    {
        "ID": "WebQTest-489_17f01781cffbd351cde8cd6506c5349e", 
        "webqsp_ID": "WebQTest-489", 
        "webqsp_question": "who plays stephanie plum in one for the money", 
        "machine_question": "who plays stephanie plum in the film has a charcter named Stephanie Plum", 
        "question": "In the film with the characater named Stephanie Plum, who plays her?", 
        "sparql": "PREFIX ns: <http://rdf.freebase.com/ns/>\nSELECT DISTINCT ?x\nWHERE {\nFILTER (?x != ?c)\nFILTER (!isLiteral(?x) OR lang(?x) = '' OR langMatches(lang(?x), 'en'))\n?c ns:film.film.starring ?k .\n?k ns:film.performance.character ns:m.098by5 . \n?c ns:film.film.starring ?y .\n?y ns:film.performance.actor ?x .\n?y ns:film.performance.character ns:m.098by5 .\n}\n", 
        "compositionality_type": "composition", 
        "answers": [
            {
                "answer": "Katherine Heigl", 
                "answer_id": "m.025b5y", 
                "aliases": [
                    "Katherine Marie Heigl", 
                    "Katherine M. Heigl", 
                    "Katie"
                ]
            }
        ], 
        "created": "2018-02-13T03:36:40"
    }, 
    {
        "ID": "WebQTest-430_0ed55ab55fae21af5b4b03af90678e30", 
        "webqsp_ID": "WebQTest-430", 
        "webqsp_question": "what instruments does justin bieber use", 
        "machine_question": "what instruments does the person education institution is Stratford Northwestern Secondary School use", 
        "question": "What are the instruments utilized by the person who as taught at Stratford Northwestern Secondary School?", 
        "sparql": "PREFIX ns: <http://rdf.freebase.com/ns/>\nSELECT DISTINCT ?x\nWHERE {\nFILTER (?x != ?c)\nFILTER (!isLiteral(?x) OR lang(?x) = '' OR langMatches(lang(?x), 'en'))\n?c ns:people.person.education ?k .\n?k ns:education.education.institution ns:m.02w1qmc . \n?c ns:music.group_member.membership ?y .\n?y ns:music.group_membership.role ?x .\n}\n", 
        "compositionality_type": "composition", 
        "answers": [
            {
                "answer": "Vocals", 
                "answer_id": "m.0290ngj", 
                "aliases": [
                    "main vocals", 
                    "Clean vocals", 
                    "vocals", 
                    "vocal", 
                    "Vocal"
                ]
            }
        ], 
        "created": "2018-02-13T03:29:06"
    }, 
    {
        "ID": "WebQTrn-589_0221fbe445d2329cd914c556d410ebfe", 
        "webqsp_ID": "WebQTrn-589", 
        "webqsp_question": "what city was selena gomez born in", 
        "machine_question": "what city was the artist had a concert tour named Stars Dance Tour born in", 
        "question": "What is the birthplace of the artist who went on a concert tour called Stars and Dance Tour?", 
        "sparql": "PREFIX ns: <http://rdf.freebase.com/ns/>\nSELECT DISTINCT ?x\nWHERE {\nFILTER (?x != ?c)\nFILTER (!isLiteral(?x) OR lang(?x) = '' OR langMatches(lang(?x), 'en'))\n?c ns:music.artist.concert_tours ns:m.0t52yjt . \n?c ns:people.person.place_of_birth ?x .\n}\n", 
        "compositionality_type": "composition", 
        "answers": [
            {
                "answer": "Grand Prairie", 
                "answer_id": "m.013mbz", 
                "aliases": [
                    "Grand Prairie, Texas", 
                    "Tarrant County / Grand Prairie city"
                ]
            }
        ], 
        "created": "2018-02-12T20:45:48"
    }, 
    {
        "ID": "WebQTrn-690_9fccf62b5ff2381d3e47bc9d9773124a", 
        "webqsp_ID": "WebQTrn-690", 
        "webqsp_question": "who all has jason kidd played for", 
        "machine_question": "who all has jason kidd played for and the sports team owner is Mark Cuban", 
        "question": "What team is owned by Mark Cuban and inlcudes Jason Kidd as an alumni?", 
        "sparql": "PREFIX ns: <http://rdf.freebase.com/ns/>\nSELECT DISTINCT ?x\nWHERE {\nFILTER (?x != ns:m.02cg2v)\nFILTER (!isLiteral(?x) OR lang(?x) = '' OR langMatches(lang(?x), 'en'))\nns:m.02cg2v ns:sports.pro_athlete.teams ?y .\n?y ns:sports.sports_team_roster.team ?x .\n?x ns:sports.professional_sports_team.owner_s ns:m.024t0y . \n}", 
        "compositionality_type": "conjunction", 
        "answers": [
            {
                "answer": "Dallas Mavericks", 
                "answer_id": "m.0jmcv", 
                "aliases": [
                    "Mavs", 
                    "Mavericks"
                ]
            }
        ], 
        "created": "2018-02-12T20:56:28"
    }, 
    {
        "ID": "WebQTrn-3681_bedad6538f5c6114bfe9f92e6c0dfaf0", 
        "webqsp_ID": "WebQTrn-3681", 
        "webqsp_question": "who is mexico 's president right now 2011", 
        "machine_question": "who is the country that has the national anthem Himno Nacional Mexicano 's president right now 2011", 
        "question": "Who is the president of the country that has national anthem Himno Nacional Mexico in 2011?", 
        "sparql": "PREFIX ns: <http://rdf.freebase.com/ns/>\nSELECT DISTINCT ?x\nWHERE {\nFILTER (?x != ?c)\nFILTER (!isLiteral(?x) OR lang(?x) = '' OR langMatches(lang(?x), 'en'))\n?c ns:location.country.national_anthem ?k .\n?k ns:government.national_anthem_of_a_country.anthem ns:m.012144 . \n?c ns:government.governmental_jurisdiction.governing_officials ?y .\n?y ns:government.government_position_held.office_holder ?x .\n?y ns:government.government_position_held.basic_title ns:m.060c4 .\nFILTER(NOT EXISTS {?y ns:government.government_position_held.from ?sk0} || \nEXISTS {?y ns:government.government_position_held.from ?sk1 . \nFILTER(xsd:datetime(?sk1) <= \"2011-12-31\"^^xsd:dateTime) })\nFILTER(NOT EXISTS {?y ns:government.government_position_held.to ?sk2} || \nEXISTS {?y ns:government.government_position_held.to ?sk3 . \nFILTER(xsd:datetime(?sk3) >= \"2011-01-01\"^^xsd:dateTime) })\n}\n", 
        "compositionality_type": "composition", 
        "answers": [
            {
                "answer": "Felipe Calder\u00f3n", 
                "answer_id": "m.06bbbt", 
                "aliases": [
                    "Felipe Calderon", 
                    "Felipe de Jes\u00fas Calder\u00f3n Hinojosa", 
                    "President Felipe Calderon"
                ]
            }
        ], 
        "created": "2018-02-13T02:22:19"
    }, 
    {
        "ID": "WebQTrn-3251_f754b516be3ab5f1be55fba222465c09", 
        "webqsp_ID": "WebQTrn-3251", 
        "webqsp_question": "what college is in greeley colorado", 
        "machine_question": "what college is in greeley colorado and the educational institution newspaper is The Mirror", 
        "question": "What college is the educational institution with The Mirror newspaper in Greeley, Colorado?", 
        "sparql": "PREFIX ns: <http://rdf.freebase.com/ns/>\nSELECT DISTINCT ?x\nWHERE {\nFILTER (?x != ns:m.0rczx)\nFILTER (!isLiteral(?x) OR lang(?x) = '' OR langMatches(lang(?x), 'en'))\nns:m.0rczx ns:location.location.contains ?x .\n?x ns:common.topic.notable_types ns:m.01y2hnl .\n?x ns:education.educational_institution.newspaper ns:m.02pqh9f . \n}", 
        "compositionality_type": "conjunction", 
        "answers": [
            {
                "answer": "University of Northern Colorado", 
                "answer_id": "m.01_k7f", 
                "aliases": [
                    "University of Northern Colorado, Greeley", 
                    "UNC", 
                    "UNCO", 
                    "University of Northern Colorado, main campus"
                ]
            }
        ], 
        "created": "2018-02-13T01:31:49"
    }, 
    {
        "ID": "WebQTrn-932_a9b18d079f29555cbd1e1740c7d6e40e", 
        "webqsp_ID": "WebQTrn-932", 
        "webqsp_question": "what are the major religions in russia", 
        "machine_question": "what are the major religions in the country that contains Krasnodar Krai", 
        "question": "The country that contains Krasnodar Krai has what major religions?", 
        "sparql": "PREFIX ns: <http://rdf.freebase.com/ns/>\nSELECT DISTINCT ?x\nWHERE {\nFILTER (?x != ?c)\nFILTER (!isLiteral(?x) OR lang(?x) = '' OR langMatches(lang(?x), 'en'))\n?c ns:location.country.administrative_divisions ns:m.02dw2c . \n?c ns:location.statistical_region.religions ?y .\n?y ns:location.religion_percentage.religion ?x .\n}\n", 
        "compositionality_type": "composition", 
        "answers": [
            {
                "answer": "Russian Orthodox Church", 
                "answer_id": "m.0b06q", 
                "aliases": [
                    "Russian Orthodox"
                ]
            }, 
            {
                "answer": "Islam", 
                "answer_id": "m.0flw86", 
                "aliases": []
            }
        ], 
        "created": "2018-02-12T21:21:48"
    }, 
    {
        "ID": "WebQTest-1382_e18694cce96ebad5237f82e2126706ef", 
        "webqsp_ID": "WebQTest-1382", 
        "webqsp_question": "what other countries border argentina", 
        "machine_question": "what other countries border argentina and the location time zone is Amazon Time Zone", 
        "question": "What Amazon Time Zone countries border Argentina?", 
        "sparql": "PREFIX ns: <http://rdf.freebase.com/ns/>\nSELECT DISTINCT ?x\nWHERE {\nFILTER (?x != ns:m.0jgd)\nFILTER (!isLiteral(?x) OR lang(?x) = '' OR langMatches(lang(?x), 'en'))\nns:m.0jgd ns:location.location.adjoin_s ?y .\n?y ns:location.adjoining_relationship.adjoins ?x .\n?x ns:common.topic.notable_types ns:m.01mp .\n?x ns:location.location.time_zones ns:m.0y496y2 . \n}", 
        "compositionality_type": "conjunction", 
        "answers": [
            {
                "answer": "Brazil", 
                "answer_id": "m.015fr", 
                "aliases": [
                    "Brazilian ", 
                    "Rep\u00fablica Federativa do Brasil", 
                    "Brasil", 
                    "Federative Republic of Brazil"
                ]
            }
        ], 
        "created": "2018-02-13T05:14:25"
    }, 
    {
        "ID": "WebQTrn-1881_1e11f69ade2d2440e13a687c9ba67c50", 
        "webqsp_ID": "WebQTrn-1881", 
        "webqsp_question": "what are the holidays of islam", 
        "machine_question": "what are the holidays of the religion organiztion is Progressive Dawoodi Bohra", 
        "question": "What are the holidays of Progressive Dawoodi Bohra?", 
        "sparql": "PREFIX ns: <http://rdf.freebase.com/ns/>\nSELECT DISTINCT ?x\nWHERE {\nFILTER (?x != ?c)\nFILTER (!isLiteral(?x) OR lang(?x) = '' OR langMatches(lang(?x), 'en'))\n?c ns:religion.religion.organizations ns:m.09sxls . \n?c ns:religion.religion.holidays ?x .\n}\n", 
        "compositionality_type": "composition", 
        "answers": [
            {
                "answer": "Eid al-Fitr Eve", 
                "answer_id": "m.0_tkhhs", 
                "aliases": []
            }, 
            {
                "answer": "Eid-Ul-Adha Eve", 
                "answer_id": "m.0_tkryk", 
                "aliases": []
            }, 
            {
                "answer": "Eid al-Adha", 
                "answer_id": "m.01_403", 
                "aliases": [
                    "bakra eid", 
                    "Greater Eid", 
                    "eid al adha", 
                    "bakr-id", 
                    "Eid ul-adha", 
                    "id eladha", 
                    "3ed el adha", 
                    "eid aladha", 
                    "Eid-al-adha", 
                    "Id el adha", 
                    "3eed el adha", 
                    "id uladha", 
                    "3id el adha", 
                    "The Festival of Sacrifice", 
                    "Kurban Bayram\u0131", 
                    "3eed eladha", 
                    "eid el adha", 
                    "3ed eladha", 
                    "3ed elad7a", 
                    "3eed elad7a", 
                    "eid adha", 
                    "Sacrifice Feast", 
                    "3eed el ad7a", 
                    "3id elad7a", 
                    "3ed el ad7a", 
                    "eid ul adha", 
                    "Feast of Sacrifice", 
                    "eid eladha", 
                    "id aladha", 
                    "Festival of Sacrifice", 
                    "id al adha", 
                    "3id eladha", 
                    "3id el ad7a", 
                    "Id-ul-adha", 
                    "Id al-adha", 
                    "id ul adha", 
                    "eid uladha", 
                    "bakrid", 
                    "bakrid eid", 
                    "Eid el-adha"
                ]
            }, 
            {
                "answer": "Lailat al Mi'raj", 
                "answer_id": "m.0114y4k_", 
                "aliases": []
            }, 
            {
                "answer": "Nuzul Al-Quran", 
                "answer_id": "m.011njw8h", 
                "aliases": []
            }, 
            {
                "answer": "Eid al-Fitr", 
                "answer_id": "m.0148n3", 
                "aliases": [
                    "3ed elfitr", 
                    "eid alfitr", 
                    "3ed el fitr", 
                    "3id elfiter", 
                    "3id elfitr", 
                    "eid ul fitr", 
                    "id elfitr", 
                    "id al fiter", 
                    "eid al fitr", 
                    "id ul fiter", 
                    "eid ulfiter", 
                    "id alfitr", 
                    "3eed el fiter", 
                    "3eed elfitr", 
                    "id elfiter", 
                    "eid ulfitr", 
                    "Eid-al-Fitr", 
                    "eid al fiter", 
                    "Id al-Fitr", 
                    "eid fitr", 
                    "Id-ul-Fitr", 
                    "id alfiter", 
                    "id el fiter", 
                    "eid elfiter", 
                    "3eed elfiter", 
                    "3id el fitr", 
                    "id ulfiter", 
                    "Eid ul-Fitr", 
                    "eid el fitr", 
                    "3id el fiter", 
                    "3ed el fiter", 
                    "eid alfiter", 
                    "\u012adu l-Fi\u1e6dr", 
                    "eid ul fiter", 
                    "3ed elfiter", 
                    "3eed el fitr", 
                    "eid", 
                    "Hari Raya Aidilfitri", 
                    "eid el fiter", 
                    "id ulfitr"
                ]
            }, 
            {
                "answer": "Day of Arafat", 
                "answer_id": "m.027cs49", 
                "aliases": [
                    "Day of Arafa", 
                    "Arafa day", 
                    "Arafat day"
                ]
            }, 
            {
                "answer": "Day of Ashura", 
                "answer_id": "m.02gk03", 
                "aliases": []
            }, 
            {
                "answer": "Mourning of Muharram", 
                "answer_id": "m.03clhwf", 
                "aliases": []
            }, 
            {
                "answer": "Laylat al-Qadr", 
                "answer_id": "m.04b4l4", 
                "aliases": [
                    "Shab-e-Qadr"
                ]
            }, 
            {
                "answer": "Barat Night", 
                "answer_id": "m.04jc26j", 
                "aliases": []
            }, 
            {
                "answer": "Mawlid", 
                "answer_id": "m.04q3_d", 
                "aliases": [
                    "mawlid al-nabi", 
                    "Prophet's Birthday", 
                    "m\u012bl\u0101d", 
                    "milad un-nabi", 
                    "mawlid al nabi", 
                    "mulud", 
                    "Mevlid", 
                    "Eid Milad ul-Nabi", 
                    "Milad-un-Nabi", 
                    "Mevlit"
                ]
            }, 
            {
                "answer": "Ramadan", 
                "answer_id": "m.06j8x", 
                "aliases": [
                    "Rama\u1e0d\u0101n", 
                    "ramazan"
                ]
            }, 
            {
                "answer": "Islamic New Year", 
                "answer_id": "m.07_46x", 
                "aliases": [
                    "Muslim New Year"
                ]
            }, 
            {
                "answer": "Night of Wishes", 
                "answer_id": "m.0vpsp_r", 
                "aliases": [
                    "Laylat Al-ragha'ib"
                ]
            }
        ], 
        "created": "2018-02-12T23:01:45"
    }, 
    {
        "ID": "WebQTrn-1881_1b40ec5e2970a33a86dc1df10b72db1c", 
        "webqsp_ID": "WebQTrn-1881", 
        "webqsp_question": "what are the holidays of islam", 
        "machine_question": "what are the holidays of the religion belief is God in Islam", 
        "question": "What holidays are in the religion God in Islam?", 
        "sparql": "PREFIX ns: <http://rdf.freebase.com/ns/>\nSELECT DISTINCT ?x\nWHERE {\nFILTER (?x != ?c)\nFILTER (!isLiteral(?x) OR lang(?x) = '' OR langMatches(lang(?x), 'en'))\n?c ns:religion.religion.beliefs ns:m.09kb_2 . \n?c ns:religion.religion.holidays ?x .\n}\n", 
        "compositionality_type": "composition", 
        "answers": [
            {
                "answer": "Eid al-Fitr Eve", 
                "answer_id": "m.0_tkhhs", 
                "aliases": []
            }, 
            {
                "answer": "Eid-Ul-Adha Eve", 
                "answer_id": "m.0_tkryk", 
                "aliases": []
            }, 
            {
                "answer": "Eid al-Adha", 
                "answer_id": "m.01_403", 
                "aliases": [
                    "bakra eid", 
                    "Greater Eid", 
                    "eid al adha", 
                    "bakr-id", 
                    "Eid ul-adha", 
                    "id eladha", 
                    "3ed el adha", 
                    "eid aladha", 
                    "Eid-al-adha", 
                    "Id el adha", 
                    "3eed el adha", 
                    "id uladha", 
                    "3id el adha", 
                    "The Festival of Sacrifice", 
                    "Kurban Bayram\u0131", 
                    "3eed eladha", 
                    "eid el adha", 
                    "3ed eladha", 
                    "3ed elad7a", 
                    "3eed elad7a", 
                    "eid adha", 
                    "Sacrifice Feast", 
                    "3eed el ad7a", 
                    "3id elad7a", 
                    "3ed el ad7a", 
                    "eid ul adha", 
                    "Feast of Sacrifice", 
                    "eid eladha", 
                    "id aladha", 
                    "Festival of Sacrifice", 
                    "id al adha", 
                    "3id eladha", 
                    "3id el ad7a", 
                    "Id-ul-adha", 
                    "Id al-adha", 
                    "id ul adha", 
                    "eid uladha", 
                    "bakrid", 
                    "bakrid eid", 
                    "Eid el-adha"
                ]
            }, 
            {
                "answer": "Lailat al Mi'raj", 
                "answer_id": "m.0114y4k_", 
                "aliases": []
            }, 
            {
                "answer": "Nuzul Al-Quran", 
                "answer_id": "m.011njw8h", 
                "aliases": []
            }, 
            {
                "answer": "Eid al-Fitr", 
                "answer_id": "m.0148n3", 
                "aliases": [
                    "3ed elfitr", 
                    "eid alfitr", 
                    "3ed el fitr", 
                    "3id elfiter", 
                    "3id elfitr", 
                    "eid ul fitr", 
                    "id elfitr", 
                    "id al fiter", 
                    "eid al fitr", 
                    "id ul fiter", 
                    "eid ulfiter", 
                    "id alfitr", 
                    "3eed el fiter", 
                    "3eed elfitr", 
                    "id elfiter", 
                    "eid ulfitr", 
                    "Eid-al-Fitr", 
                    "eid al fiter", 
                    "Id al-Fitr", 
                    "eid fitr", 
                    "Id-ul-Fitr", 
                    "id alfiter", 
                    "id el fiter", 
                    "eid elfiter", 
                    "3eed elfiter", 
                    "3id el fitr", 
                    "id ulfiter", 
                    "Eid ul-Fitr", 
                    "eid el fitr", 
                    "3id el fiter", 
                    "3ed el fiter", 
                    "eid alfiter", 
                    "\u012adu l-Fi\u1e6dr", 
                    "eid ul fiter", 
                    "3ed elfiter", 
                    "3eed el fitr", 
                    "eid", 
                    "Hari Raya Aidilfitri", 
                    "eid el fiter", 
                    "id ulfitr"
                ]
            }, 
            {
                "answer": "Day of Arafat", 
                "answer_id": "m.027cs49", 
                "aliases": [
                    "Day of Arafa", 
                    "Arafa day", 
                    "Arafat day"
                ]
            }, 
            {
                "answer": "Day of Ashura", 
                "answer_id": "m.02gk03", 
                "aliases": []
            }, 
            {
                "answer": "Mourning of Muharram", 
                "answer_id": "m.03clhwf", 
                "aliases": []
            }, 
            {
                "answer": "Laylat al-Qadr", 
                "answer_id": "m.04b4l4", 
                "aliases": [
                    "Shab-e-Qadr"
                ]
            }, 
            {
                "answer": "Barat Night", 
                "answer_id": "m.04jc26j", 
                "aliases": []
            }, 
            {
                "answer": "Mawlid", 
                "answer_id": "m.04q3_d", 
                "aliases": [
                    "mawlid al-nabi", 
                    "Prophet's Birthday", 
                    "m\u012bl\u0101d", 
                    "milad un-nabi", 
                    "mawlid al nabi", 
                    "mulud", 
                    "Mevlid", 
                    "Eid Milad ul-Nabi", 
                    "Milad-un-Nabi", 
                    "Mevlit"
                ]
            }, 
            {
                "answer": "Ramadan", 
                "answer_id": "m.06j8x", 
                "aliases": [
                    "Rama\u1e0d\u0101n", 
                    "ramazan"
                ]
            }, 
            {
                "answer": "Islamic New Year", 
                "answer_id": "m.07_46x", 
                "aliases": [
                    "Muslim New Year"
                ]
            }, 
            {
                "answer": "Night of Wishes", 
                "answer_id": "m.0vpsp_r", 
                "aliases": [
                    "Laylat Al-ragha'ib"
                ]
            }
        ], 
        "created": "2018-02-12T23:01:45"
    }, 
    {
        "ID": "WebQTrn-3176_ca40169567852c83d8beb13835e326f3", 
        "webqsp_ID": "WebQTrn-3176", 
        "webqsp_question": "when is the last time the raiders won a championship", 
        "machine_question": "when is the last time the the sports team owner is Mark Davis won a championship", 
        "question": "When was the last time the sports team owned by Mark Davis win a championship?", 
        "sparql": "PREFIX ns: <http://rdf.freebase.com/ns/>\nSELECT DISTINCT ?x\nWHERE {\nFILTER (?x != ?c)\nFILTER (!isLiteral(?x) OR lang(?x) = '' OR langMatches(lang(?x), 'en'))\n?c ns:sports.professional_sports_team.owner_s ns:m.0hzm4gd . \n?c ns:sports.sports_team.championships ?x .\n?x ns:time.event.end_date ?sk0 .\n}\nORDER BY DESC(xsd:datetime(?sk0))\nLIMIT 1\n", 
        "compositionality_type": "composition", 
        "answers": [
            {
                "answer": "2003 AFC Championship Game", 
                "answer_id": "m.0_gt_px", 
                "aliases": []
            }
        ], 
        "created": "2018-02-13T01:24:20"
    }, 
    {
        "ID": "WebQTrn-3535_a169c3e0ff9e2893c156755cf719b5ff", 
        "webqsp_ID": "WebQTrn-3535", 
        "webqsp_question": "who does the voice of kovu in lion king", 
        "machine_question": "who does the voice of kovu in the film has a charcter named Vitani", 
        "question": "In the film with the character name Vitani, who is the voice of Kovu?", 
        "sparql": "PREFIX ns: <http://rdf.freebase.com/ns/>\nSELECT DISTINCT ?x\nWHERE {\nFILTER (?x != ?c)\nFILTER (!isLiteral(?x) OR lang(?x) = '' OR langMatches(lang(?x), 'en'))\n?c ns:film.film.starring ?k .\n?k ns:film.performance.character ns:m.0bswhn . \n?c ns:film.film.starring ?y .\n?y ns:film.performance.actor ?x .\n?y ns:film.performance.character ns:m.0bnznr .\n}\n", 
        "compositionality_type": "composition", 
        "answers": [
            {
                "answer": "Jason Marsden", 
                "answer_id": "m.01b3bp", 
                "aliases": [
                    "J-Mars", 
                    "Jason Christopher Marsden", 
                    "Jay"
                ]
            }
        ], 
        "created": "2018-02-13T02:08:32"
    }, 
    {
        "ID": "WebQTrn-1437_82e069064d66663276c549f47e5e179d", 
        "webqsp_ID": "WebQTrn-1437", 
        "webqsp_question": "what countries do germany border", 
        "machine_question": "what countries do germany border and the location time zone is Atlantic Time Zone", 
        "question": "There is a country that borders Germany in the Atlantic Time Zone. What it is?", 
        "sparql": "PREFIX ns: <http://rdf.freebase.com/ns/>\nSELECT DISTINCT ?x\nWHERE {\nFILTER (?x != ns:m.0345h)\nFILTER (!isLiteral(?x) OR lang(?x) = '' OR langMatches(lang(?x), 'en'))\nns:m.0345h ns:location.location.adjoin_s ?y .\n?y ns:location.adjoining_relationship.adjoins ?x .\n?x ns:common.topic.notable_types ns:m.01mp .\n?x ns:location.location.time_zones ns:m.042g7t . \n}", 
        "compositionality_type": "conjunction", 
        "answers": [
            {
                "answer": "Netherlands", 
                "answer_id": "m.059j2", 
                "aliases": [
                    "The Netherlands", 
                    "Nederlands", 
                    "Holland", 
                    "Nederland", 
                    "Hollanti"
                ]
            }
        ], 
        "created": "2018-02-12T22:18:44"
    }, 
    {
        "ID": "WebQTrn-1447_b24982ea2b4382ec3cf1143dda2b32fd", 
        "webqsp_ID": "WebQTrn-1447", 
        "webqsp_question": "who did the cleveland browns draft", 
        "machine_question": "who did the the team has a team moscot named Chomps draft", 
        "question": "Who got drafted by the team with mascot named Chomps?", 
        "sparql": "PREFIX ns: <http://rdf.freebase.com/ns/>\nSELECT DISTINCT ?x\nWHERE {\nFILTER (?x != ?c)\nFILTER (!isLiteral(?x) OR lang(?x) = '' OR langMatches(lang(?x), 'en'))\n?c ns:sports.sports_team.team_mascot ns:m.052tm_j . \n?c ns:sports.professional_sports_team.draft_picks ?y .\n?y ns:sports.sports_league_draft_pick.player ?x .\n}\n", 
        "compositionality_type": "composition", 
        "answers": [
            {
                "answer": "Kellen Winslow II", 
                "answer_id": "m.03tt9p", 
                "aliases": [
                    "Kellen Boswell Winslow, Jr.", 
                    "Shash", 
                    "Kellen Boswell Winslow", 
                    "Kellen Winslow"
                ]
            }, 
            {
                "answer": "Braylon Edwards", 
                "answer_id": "m.05byjc", 
                "aliases": [
                    "Braylon Jamel Edwards"
                ]
            }, 
            {
                "answer": "Trent Richardson", 
                "answer_id": "m.076vn8w", 
                "aliases": []
            }, 
            {
                "answer": "Brady Quinn", 
                "answer_id": "m.08gf9t", 
                "aliases": [
                    "Brayden Tyler Quinn", 
                    "brady_quinn"
                ]
            }, 
            {
                "answer": "Jeff Faine", 
                "answer_id": "m.0bdv4h", 
                "aliases": [
                    "Jeffrey Kalei Faine"
                ]
            }, 
            {
                "answer": "Kamerion Wimbley", 
                "answer_id": "m.0cwfp6", 
                "aliases": []
            }, 
            {
                "answer": "Ryan Miller", 
                "answer_id": "m.0dljy80", 
                "aliases": []
            }, 
            {
                "answer": "Joe Thomas", 
                "answer_id": "m.0fjtlw", 
                "aliases": [
                    "Joseph Thomas"
                ]
            }, 
            {
                "answer": "Justin Gilbert", 
                "answer_id": "m.0h_5dlc", 
                "aliases": []
            }, 
            {
                "answer": "Johnny Manziel", 
                "answer_id": "m.0n45_f7", 
                "aliases": [
                    "Jonathan Paul Manziel", 
                    "Johnny Football", 
                    "Johnny Cleveland"
                ]
            }, 
            {
                "answer": "Terrance West", 
                "answer_id": "m.0xnbrpw", 
                "aliases": []
            }
        ], 
        "created": "2018-02-12T22:18:56"
    }, 
    {
        "ID": "WebQTrn-358_29c81279ed9a982e12f82e764083db76", 
        "webqsp_ID": "WebQTrn-358", 
        "webqsp_question": "what movies has taylor lautner been in 2011", 
        "machine_question": "what movies has taylor lautner been in 2011 and a tv series that has 0 season", 
        "question": "What movies starring Taylor Lautner in 2011 that has a television series with 0 season?", 
        "sparql": "PREFIX ns: <http://rdf.freebase.com/ns/>\nSELECT DISTINCT ?x\nWHERE {\nFILTER (?x != ns:m.07ldhs)\nFILTER (!isLiteral(?x) OR lang(?x) = '' OR langMatches(lang(?x), 'en'))\nns:m.07ldhs ns:film.actor.film ?y .\n?y ns:film.performance.film ?x .\nFILTER(NOT EXISTS {?x ns:film.film.initial_release_date ?sk0} || \nEXISTS {?x ns:film.film.initial_release_date ?sk1 . \nFILTER(xsd:datetime(?sk1) >= \"2011-01-01\"^^xsd:dateTime) })\nFILTER(NOT EXISTS {?x ns:film.film.initial_release_date ?sk2} || \nEXISTS {?x ns:film.film.initial_release_date ?sk3 . \nFILTER(xsd:datetime(?sk3) <= \"2011-12-31\"^^xsd:dateTime) })\n?x ns:tv.tv_series_episode.season_number \"0\" . \n}", 
        "compositionality_type": "conjunction", 
        "answers": [
            {
                "answer": "He's a Bully, Charlie Brown", 
                "answer_id": "m.02686wj", 
                "aliases": [
                    "He's a Bully Charlie Brown"
                ]
            }
        ], 
        "created": "2018-02-12T20:17:02"
    }, 
    {
        "ID": "WebQTrn-2152_0fd881e73ad021449c1ea16bb9952f2a", 
        "webqsp_ID": "WebQTrn-2152", 
        "webqsp_question": "what teams are in the american league west", 
        "machine_question": "what teams are in the american league west and the sports team owner is Arte Moreno", 
        "question": "What American League West sports team is owned by Arte Moreno?", 
        "sparql": "PREFIX ns: <http://rdf.freebase.com/ns/>\nSELECT DISTINCT ?x\nWHERE {\nFILTER (?x != ns:m.07fbnf)\nFILTER (!isLiteral(?x) OR lang(?x) = '' OR langMatches(lang(?x), 'en'))\nns:m.07fbnf ns:sports.sports_league.teams ?y .\n?y ns:sports.sports_league_participation.team ?x .\n?x ns:sports.professional_sports_team.owner_s ns:m.01hf9v . \n}", 
        "compositionality_type": "conjunction", 
        "answers": [
            {
                "answer": "Los Angeles Angels of Anaheim", 
                "answer_id": "m.04wmvz", 
                "aliases": [
                    "California Angels", 
                    "Los Angeles Angels", 
                    "Anaheim Angels"
                ]
            }
        ], 
        "created": "2018-02-12T23:29:58"
    }, 
    {
        "ID": "WebQTrn-2906_91d303bf23f9a9eeb4e2fb2c28cf04b2", 
        "webqsp_ID": "WebQTrn-2906", 
        "webqsp_question": "what is the houston rockets mascot", 
        "machine_question": "what is the the sports team owner is Leslie Alexander mascot", 
        "question": "What is team owner Leslie Alexander's sports team mascot?", 
        "sparql": "PREFIX ns: <http://rdf.freebase.com/ns/>\nSELECT DISTINCT ?x\nWHERE {\nFILTER (?x != ?c)\nFILTER (!isLiteral(?x) OR lang(?x) = '' OR langMatches(lang(?x), 'en'))\n?c ns:sports.professional_sports_team.owner_s ns:m.02qpcbt . \n?c ns:sports.sports_team.team_mascot ?x .\n}\n", 
        "compositionality_type": "composition", 
        "answers": [
            {
                "answer": "Clutch", 
                "answer_id": "m.02qmvfb", 
                "aliases": []
            }
        ], 
        "created": "2018-02-13T00:52:43"
    }, 
    {
        "ID": "WebQTrn-648_563b401a13e5a2b9bc3c9ec4bbe58962", 
        "webqsp_ID": "WebQTrn-648", 
        "webqsp_question": "what continent does israel belong to", 
        "machine_question": "what continent does the country that has the national anthem Hatikvah belong to", 
        "question": "What continent includes the country with the national anthem Hatikvah?", 
        "sparql": "PREFIX ns: <http://rdf.freebase.com/ns/>\nSELECT DISTINCT ?x\nWHERE {\nFILTER (?x != ?c)\nFILTER (!isLiteral(?x) OR lang(?x) = '' OR langMatches(lang(?x), 'en'))\n?c ns:location.country.national_anthem ?k .\n?k ns:government.national_anthem_of_a_country.anthem ns:m.019_d2 . \n?c ns:base.locations.countries.continent ?x .\n}\n", 
        "compositionality_type": "composition", 
        "answers": [
            {
                "answer": "Asia", 
                "answer_id": "m.0j0k", 
                "aliases": []
            }
        ], 
        "created": "2018-02-12T20:51:37"
    }, 
    {
        "ID": "WebQTrn-628_99ab4f6e2cbc1af8c6bcadc7649473e0", 
        "webqsp_ID": "WebQTrn-628", 
        "webqsp_question": "where is the nascar hall of fame", 
        "machine_question": "where is the nascar hall of fame and is the tv show NBC Nightside was filmed there", 
        "question": "The TV show NBC Nightside was filmed in what City where the Nascar Hall of Fame is?", 
        "sparql": "PREFIX ns: <http://rdf.freebase.com/ns/>\nSELECT DISTINCT ?x\nWHERE {\nFILTER (?x != ns:m.0635_7)\nFILTER (!isLiteral(?x) OR lang(?x) = '' OR langMatches(lang(?x), 'en'))\nns:m.0635_7 ns:location.location.containedby ?x .\n?x ns:tv.tv_location.tv_shows_filmed_here ns:m.0b6grkv . \n}", 
        "compositionality_type": "conjunction", 
        "answers": [
            {
                "answer": "Charlotte", 
                "answer_id": "m.0fsb8", 
                "aliases": [
                    "Charlotte, NC", 
                    "Charlotte, North Carolina", 
                    "The Queen City", 
                    "Mecklenburg County / Charlotte city"
                ]
            }
        ], 
        "created": "2018-02-12T20:49:21"
    }, 
    {
        "ID": "WebQTrn-2856_15aa91708ce94eb4e225021418fd3b54", 
        "webqsp_ID": "WebQTrn-2856", 
        "webqsp_question": "what countries in the world speak arabic", 
        "machine_question": "what countries in the world speak arabic and is the location that appointed Abdullah II of Jordan to govermental position", 
        "question": "What country Speaks Arabic and is the place that appointed Abdullah II of Jordan to a governmental position?", 
        "sparql": "PREFIX ns: <http://rdf.freebase.com/ns/>\nSELECT DISTINCT ?x\nWHERE {\nFILTER (?x != ns:m.0jzc)\nFILTER (!isLiteral(?x) OR lang(?x) = '' OR langMatches(lang(?x), 'en'))\nns:m.0jzc ns:language.human_language.countries_spoken_in ?x .\n?x ns:government.governmental_jurisdiction.governing_officials ?c .\n?c ns:government.government_position_held.appointed_by ns:m.015tp7 . \n}", 
        "compositionality_type": "conjunction", 
        "answers": [
            {
                "answer": "Jordan", 
                "answer_id": "m.03__y", 
                "aliases": []
            }, 
            {
                "answer": "Jordan", 
                "answer_id": "m.03__y", 
                "aliases": []
            }
        ], 
        "created": "2018-02-13T00:48:16"
    }, 
    {
        "ID": "WebQTrn-3544_a53f1e3e6c308b366d6b220f33d19384", 
        "webqsp_ID": "WebQTrn-3544", 
        "webqsp_question": "where is arabic the official language", 
        "machine_question": "where is arabic the official language and is the location that appointed Fuad Masum to govermental position", 
        "question": "What location appointed Fuad Masum to govermental position and Arabic is the official language?", 
        "sparql": "PREFIX ns: <http://rdf.freebase.com/ns/>\nSELECT DISTINCT ?x\nWHERE {\nFILTER (?x != ns:m.0jzc)\nFILTER (!isLiteral(?x) OR lang(?x) = '' OR langMatches(lang(?x), 'en'))\nns:m.0jzc ns:language.human_language.countries_spoken_in ?x .\n?x ns:location.country.official_language ns:m.0jzc .\n?x ns:government.governmental_jurisdiction.governing_officials ?c .\n?c ns:government.government_position_held.appointed_by ns:m.011bzky3 . \n}", 
        "compositionality_type": "conjunction", 
        "answers": [
            {
                "answer": "Iraq", 
                "answer_id": "m.0d05q4", 
                "aliases": []
            }
        ], 
        "created": "2018-02-13T02:10:57"
    }, 
    {
        "ID": "WebQTrn-1019_318844bf5fd2fbb526595ecc65dc4be9", 
        "webqsp_ID": "WebQTrn-1019", 
        "webqsp_question": "where is the mozambique located", 
        "machine_question": "where is the the location that appointed President to govermental position located", 
        "question": "What location appointed President to governmental position?", 
        "sparql": "PREFIX ns: <http://rdf.freebase.com/ns/>\nSELECT DISTINCT ?x\nWHERE {\nFILTER (?x != ?c)\nFILTER (!isLiteral(?x) OR lang(?x) = '' OR langMatches(lang(?x), 'en'))\n?c ns:government.governmental_jurisdiction.governing_officials ?k .\n?k ns:government.government_position_held.appointed_by ns:m.060c4 . \n?c ns:base.locations.countries.continent ?x .\n}\n", 
        "compositionality_type": "composition", 
        "answers": [
            {
                "answer": "Africa", 
                "answer_id": "m.0dg3n1", 
                "aliases": [
                    "Afrique"
                ]
            }
        ], 
        "created": "2018-02-12T21:31:51"
    }, 
    {
        "ID": "WebQTest-331_906ad6be7bec9d208f4dde4f7721c261", 
        "webqsp_ID": "WebQTest-331", 
        "webqsp_question": "where was the temple of karnak built", 
        "machine_question": "where was the temple of karnak built and is the co2 emiisions per capita was once 2009 metric ton", 
        "question": "Where was the Temple of Karnak built that has CO2 emission at 2009 metric tons per capita?", 
        "sparql": "PREFIX ns: <http://rdf.freebase.com/ns/>\nSELECT DISTINCT ?x\nWHERE {\nFILTER (?x != ns:m.014wy4)\nFILTER (!isLiteral(?x) OR lang(?x) = '' OR langMatches(lang(?x), 'en'))\nns:m.014wy4 ns:location.location.containedby ?x .\n?x ns:location.statistical_region.co2_emissions_per_capita ?c .\n?c ns:measurement_unit.dated_metric_ton.date \"2009\"^^xsd:dateTime . \n}", 
        "compositionality_type": "conjunction", 
        "answers": [
            {
                "answer": "Egypt", 
                "answer_id": "m.02k54", 
                "aliases": [
                    "Arab Republic of Egypt"
                ]
            }
        ], 
        "created": "2018-02-13T03:18:23"
    }, 
    {
        "ID": "WebQTrn-3341_55cb813e7f336f213152c6e960ea0467", 
        "webqsp_ID": "WebQTrn-3341", 
        "webqsp_question": "what kind of money does germany", 
        "machine_question": "what kind of money does the location contains and airport that server Nijmegen", 
        "question": "What type of money is used where the Nijmegen airport is?", 
        "sparql": "PREFIX ns: <http://rdf.freebase.com/ns/>\nSELECT DISTINCT ?x\nWHERE {\nFILTER (?x != ?c)\nFILTER (!isLiteral(?x) OR lang(?x) = '' OR langMatches(lang(?x), 'en'))\n?c ns:location.location.contains ?k .\n?k ns:aviation.airport.serves ns:m.05g2b . \n?c ns:location.country.currency_used ?x .\n}\n", 
        "compositionality_type": "composition", 
        "answers": [
            {
                "answer": "Euro", 
                "answer_id": "m.02l6h", 
                "aliases": [
                    "\u20ac", 
                    "EUR"
                ]
            }
        ], 
        "created": "2018-02-13T01:42:46"
    }, 
    {
        "ID": "WebQTest-49_39b12d0bd9a41783eba6983878bd47a0", 
        "webqsp_ID": "WebQTest-49", 
        "webqsp_question": "what did the islamic people believe in", 
        "machine_question": "what did the the religion text is Quran people believe in", 
        "question": "What religion believes in the Quran?", 
        "sparql": "PREFIX ns: <http://rdf.freebase.com/ns/>\nSELECT DISTINCT ?x\nWHERE {\nFILTER (?x != ?c)\nFILTER (!isLiteral(?x) OR lang(?x) = '' OR langMatches(lang(?x), 'en'))\n?c ns:religion.religion.texts ns:m.096tx . \n?c ns:religion.religion.beliefs ?x .\n}\n", 
        "compositionality_type": "composition", 
        "answers": [
            {
                "answer": "Mahdi", 
                "answer_id": "m.019vqj", 
                "aliases": [
                    "Imam Mahdi"
                ]
            }, 
            {
                "answer": "Tawhid", 
                "answer_id": "m.01bbmp", 
                "aliases": []
            }, 
            {
                "answer": "Prophets in Islam", 
                "answer_id": "m.024b22", 
                "aliases": [
                    "Muhammad"
                ]
            }, 
            {
                "answer": "Predestination in Islam", 
                "answer_id": "m.025w817", 
                "aliases": []
            }, 
            {
                "answer": "Entering Heaven alive", 
                "answer_id": "m.02wvcg4", 
                "aliases": []
            }, 
            {
                "answer": "Monotheism", 
                "answer_id": "m.04xy3", 
                "aliases": []
            }, 
            {
                "answer": "Islamic view of angels", 
                "answer_id": "m.0698fs", 
                "aliases": []
            }, 
            {
                "answer": "Qiyamah", 
                "answer_id": "m.06rvp0", 
                "aliases": []
            }, 
            {
                "answer": "Sharia", 
                "answer_id": "m.074hw", 
                "aliases": []
            }, 
            {
                "answer": "Masih ad-Dajjal", 
                "answer_id": "m.07bfrc", 
                "aliases": [
                    "Dajjal"
                ]
            }, 
            {
                "answer": "Islamic holy books", 
                "answer_id": "m.07r6vw", 
                "aliases": []
            }, 
            {
                "answer": "God in Islam", 
                "answer_id": "m.09kb_2", 
                "aliases": []
            }, 
            {
                "answer": "\u1e6c\u016bb\u0101", 
                "answer_id": "m.0hr6vbp", 
                "aliases": []
            }
        ], 
        "created": "2018-02-13T02:42:18"
    }, 
    {
        "ID": "WebQTrn-494_eaa7a9f669e0d6d5caf732fd225ff411", 
        "webqsp_ID": "WebQTrn-494", 
        "webqsp_question": "what religions are in russia", 
        "machine_question": "what religions are in the location that appointed Vladimir Putin to govermental position", 
        "question": "The location that appointed Vladimir Putin to governmental position has what religions?", 
        "sparql": "PREFIX ns: <http://rdf.freebase.com/ns/>\nSELECT DISTINCT ?x\nWHERE {\nFILTER (?x != ?c)\nFILTER (!isLiteral(?x) OR lang(?x) = '' OR langMatches(lang(?x), 'en'))\n?c ns:government.governmental_jurisdiction.governing_officials ?k .\n?k ns:government.government_position_held.appointed_by ns:m.08193 . \n?c ns:location.statistical_region.religions ?y .\n?y ns:location.religion_percentage.religion ?x .\n}\n", 
        "compositionality_type": "composition", 
        "answers": [
            {
                "answer": "Russian Orthodox Church", 
                "answer_id": "m.0b06q", 
                "aliases": [
                    "Russian Orthodox"
                ]
            }, 
            {
                "answer": "Islam", 
                "answer_id": "m.0flw86", 
                "aliases": []
            }
        ], 
        "created": "2018-02-12T20:36:17"
    }, 
    {
        "ID": "WebQTrn-1782_f362abad7b6bfb65226e7318d8bfd31f", 
        "webqsp_ID": "WebQTrn-1782", 
        "webqsp_question": "with which country does south africa border", 
        "machine_question": "with which country does the location that appointed Thabo Mbeki to govermental position border", 
        "question": "What countries border the location that appointed Thabo Mbeki to a governmental position?", 
        "sparql": "PREFIX ns: <http://rdf.freebase.com/ns/>\nSELECT DISTINCT ?x\nWHERE {\nFILTER (?x != ?c)\nFILTER (!isLiteral(?x) OR lang(?x) = '' OR langMatches(lang(?x), 'en'))\n?c ns:government.governmental_jurisdiction.governing_officials ?k .\n?k ns:government.government_position_held.appointed_by ns:m.07q13 . \n?c ns:location.location.adjoin_s ?y .\n?y ns:location.adjoining_relationship.adjoins ?x .\n?x ns:common.topic.notable_types ns:m.01mp .\n}\n", 
        "compositionality_type": "composition", 
        "answers": [
            {
                "answer": "Botswana", 
                "answer_id": "m.0166v", 
                "aliases": []
            }, 
            {
                "answer": "Lesotho", 
                "answer_id": "m.04hvw", 
                "aliases": []
            }, 
            {
                "answer": "Mozambique", 
                "answer_id": "m.04wlh", 
                "aliases": [
                    "Republica de Mocambique", 
                    "Republic of Mozambique", 
                    "Mocambique"
                ]
            }, 
            {
                "answer": "Namibia", 
                "answer_id": "m.05bmq", 
                "aliases": []
            }, 
            {
                "answer": "Swaziland", 
                "answer_id": "m.06v36", 
                "aliases": []
            }, 
            {
                "answer": "Zimbabwe", 
                "answer_id": "m.088q4", 
                "aliases": [
                    "The Republic of Zimbabwe"
                ]
            }
        ], 
        "created": "2018-02-12T22:49:57"
    }, 
    {
        "ID": "WebQTest-85_16b2671cf2cb3d1029623703c84d2ea0", 
        "webqsp_ID": "WebQTest-85", 
        "webqsp_question": "who are the colorado representatives", 
        "machine_question": "who are the colorado representatives and held his govermental position from earliest", 
        "question": "Who is the Representatives from Colorado who started his government carer the earliest?", 
        "sparql": "PREFIX ns: <http://rdf.freebase.com/ns/>\nSELECT DISTINCT ?x\nWHERE {\nFILTER (?x != ns:m.01n4w)\nFILTER (!isLiteral(?x) OR lang(?x) = '' OR langMatches(lang(?x), 'en'))\nns:m.01n4w ns:government.political_district.representatives ?y .\n?y ns:government.government_position_held.office_holder ?x .\nFILTER(NOT EXISTS {?y ns:government.government_position_held.from ?sk0} || \nEXISTS {?y ns:government.government_position_held.from ?sk1 . \nFILTER(xsd:datetime(?sk1) <= \"2015-08-10\"^^xsd:dateTime) })\nFILTER(NOT EXISTS {?y ns:government.government_position_held.to ?sk2} || \nEXISTS {?y ns:government.government_position_held.to ?sk3 . \nFILTER(xsd:datetime(?sk3) >= \"2015-08-10\"^^xsd:dateTime) })\n?x ns:government.politician.government_positions_held ?c .\n?c ns:government.government_position_held.from ?num .\n}\nORDER BY ?num LIMIT 1", 
        "compositionality_type": "superlative", 
        "answers": [
            {
                "answer": "Mark Udall", 
                "answer_id": "m.024zbx", 
                "aliases": [
                    "Rep. Mark Udall", 
                    "Sen. Mark Udall", 
                    "Mark Emery Udall"
                ]
            }
        ], 
        "created": "2018-02-13T02:45:11"
    }, 
    {
        "ID": "WebQTrn-3563_a1ef4f2b041540b3ab20c9718475297d", 
        "webqsp_ID": "WebQTrn-3563", 
        "webqsp_question": "where to go in florida for vacation", 
        "machine_question": "where to go in the location that appointed Rick Scott to govermental position for vacation", 
        "question": "What are some of the tourist attractions in the location where Rick Scott was appointed to the government office?", 
        "sparql": "PREFIX ns: <http://rdf.freebase.com/ns/>\nSELECT DISTINCT ?x\nWHERE {\nFILTER (?x != ?c)\nFILTER (!isLiteral(?x) OR lang(?x) = '' OR langMatches(lang(?x), 'en'))\n?c ns:government.governmental_jurisdiction.governing_officials ?k .\n?k ns:government.government_position_held.appointed_by ns:m.0btx2g . \n?c ns:travel.travel_destination.tourist_attractions ?x .\n}\n", 
        "compositionality_type": "composition", 
        "answers": [
            {
                "answer": "Dry Tortugas National Park", 
                "answer_id": "m.02zjt1", 
                "aliases": [
                    "Dry Tortugas National"
                ]
            }, 
            {
                "answer": "Legoland Florida", 
                "answer_id": "m.0b6d60t", 
                "aliases": [
                    "Legoland Florida, Winter Haven"
                ]
            }, 
            {
                "answer": "Downey Park", 
                "answer_id": "m.0dl60w", 
                "aliases": [
                    "Downey"
                ]
            }, 
            {
                "answer": "Westland Mall", 
                "answer_id": "m.0n53kv5", 
                "aliases": [
                    "Westfield Westland"
                ]
            }
        ], 
        "created": "2018-02-13T02:13:07"
    }, 
    {
        "ID": "WebQTrn-871_97440c6c536f1672835d4cfecf6c698b", 
        "webqsp_ID": "WebQTrn-871", 
        "webqsp_question": "what type of political system does russia have", 
        "machine_question": "what type of political system does the country that has the national anthem National Anthem of Russia have", 
        "question": "The country that has the national anthem National Anthem of Russia has what type of political system?", 
        "sparql": "PREFIX ns: <http://rdf.freebase.com/ns/>\nSELECT DISTINCT ?x\nWHERE {\nFILTER (?x != ?c)\nFILTER (!isLiteral(?x) OR lang(?x) = '' OR langMatches(lang(?x), 'en'))\n?c ns:location.country.national_anthem ?k .\n?k ns:government.national_anthem_of_a_country.anthem ns:m.01ptxd . \n?c ns:location.country.form_of_government ?x .\n}\n", 
        "compositionality_type": "composition", 
        "answers": [
            {
                "answer": "Semi-presidential system", 
                "answer_id": "m.01dw03", 
                "aliases": [
                    "Semi-presidential"
                ]
            }, 
            {
                "answer": "Constitutional republic", 
                "answer_id": "m.0c9rw5", 
                "aliases": [
                    "Constitutional"
                ]
            }, 
            {
                "answer": "Federal republic", 
                "answer_id": "m.0j729", 
                "aliases": [
                    "Federal"
                ]
            }
        ], 
        "created": "2018-02-12T21:16:07"
    }, 
    {
        "ID": "WebQTrn-1129_906ad6be7bec9d208f4dde4f7721c261", 
        "webqsp_ID": "WebQTrn-1129", 
        "webqsp_question": "where did the cuban missile crisis happen", 
        "machine_question": "where did the cuban missile crisis happen and is the co2 emiisions per capita was once 2009 metric ton", 
        "question": "In which nation did the Cuban Missile Crisis occur and whose CO2 per capita emissions was at one time 2009 metric tons?", 
        "sparql": "PREFIX ns: <http://rdf.freebase.com/ns/>\nSELECT DISTINCT ?x\nWHERE {\nFILTER (?x != ns:m.01zxx)\nFILTER (!isLiteral(?x) OR lang(?x) = '' OR langMatches(lang(?x), 'en'))\nns:m.01zxx ns:time.event.locations ?x .\n?x ns:location.statistical_region.co2_emissions_per_capita ?c .\n?c ns:measurement_unit.dated_metric_ton.date \"2009\"^^xsd:dateTime . \n}", 
        "compositionality_type": "conjunction", 
        "answers": [
            {
                "answer": "Cuba", 
                "answer_id": "m.0d04z6", 
                "aliases": [
                    "Republic of Cuba"
                ]
            }
        ], 
        "created": "2018-02-12T21:45:49"
    }, 
    {
        "ID": "WebQTest-1560_1cbd772457447bcfbbad0b67531e9c0b", 
        "webqsp_ID": "WebQTest-1560", 
        "webqsp_question": "who founded new york university", 
        "machine_question": "who founded new york university and held his govermental position from latest", 
        "question": "Who held his governmental position latest and founded New York University?", 
        "sparql": "PREFIX ns: <http://rdf.freebase.com/ns/>\nSELECT DISTINCT ?x\nWHERE {\nFILTER (?x != ns:m.0bwfn)\nFILTER (!isLiteral(?x) OR lang(?x) = '' OR langMatches(lang(?x), 'en'))\nns:m.0bwfn ns:organization.organization.founders ?x .\n?x ns:government.politician.government_positions_held ?c .\n?c ns:government.government_position_held.from ?num .\n}\nORDER BY DESC(?num) LIMIT 1", 
        "compositionality_type": "superlative", 
        "answers": [
            {
                "answer": "Albert Gallatin", 
                "answer_id": "m.01p369", 
                "aliases": []
            }
        ], 
        "created": "2018-02-13T05:34:06"
    }, 
    {
        "ID": "WebQTest-1623_2ed287b0ef57067bd3a79f71c2fa849e", 
        "webqsp_ID": "WebQTest-1623", 
        "webqsp_question": "what is the most common language spoken in argentina", 
        "machine_question": "what is the most common language spoken in the country that has the national anthem Argentine National Anthem", 
        "question": "What is the language spoken by the most people in the nation whose national anthem is Argentine National Anthem?", 
        "sparql": "PREFIX ns: <http://rdf.freebase.com/ns/>\nSELECT DISTINCT ?x\nWHERE {\nFILTER (?x != ?c)\nFILTER (!isLiteral(?x) OR lang(?x) = '' OR langMatches(lang(?x), 'en'))\n?c ns:location.country.national_anthem ?k .\n?k ns:government.national_anthem_of_a_country.anthem ns:m.01dlgn . \n?c ns:location.country.official_language ?x .\n}\n", 
        "compositionality_type": "composition", 
        "answers": [
            {
                "answer": "Spanish Language", 
                "answer_id": "m.06nm1", 
                "aliases": [
                    "Espa\u00f1ol", 
                    "Spanish language", 
                    "Castillian", 
                    "Spanish", 
                    "The language of Cervantes", 
                    "Castellano", 
                    "Castillan", 
                    "Castilian"
                ]
            }
        ], 
        "created": "2018-02-13T05:40:20"
    }, 
    {
        "ID": "WebQTest-1194_fd7092c138eed5556933343b209f4406", 
        "webqsp_ID": "WebQTest-1194", 
        "webqsp_question": "what club does cristiano ronaldo play for in 2010", 
        "machine_question": "what club does cristiano ronaldo play for in 2010 and is the team won the 1952 Peque\u00c3\u00b1a Copa del Mundo de Clubes championship", 
        "question": "Which football club that earned the 1952 Pequena Copa del Mundo de Clubes championship had Cristiano Ronaldo as a player in 2010?", 
        "sparql": "PREFIX ns: <http://rdf.freebase.com/ns/>\nSELECT DISTINCT ?x\nWHERE {\nFILTER (?x != ns:m.02xt6q)\nFILTER (!isLiteral(?x) OR lang(?x) = '' OR langMatches(lang(?x), 'en'))\nns:m.02xt6q ns:sports.pro_athlete.teams ?y .\n?y ns:sports.sports_team_roster.team ?x .\nFILTER(NOT EXISTS {?y ns:sports.sports_team_roster.from ?sk0} || \nEXISTS {?y ns:sports.sports_team_roster.from ?sk1 . \nFILTER(xsd:datetime(?sk1) <= \"2010-12-31\"^^xsd:dateTime) })\nFILTER(NOT EXISTS {?y ns:sports.sports_team_roster.to ?sk2} || \nEXISTS {?y ns:sports.sports_team_roster.to ?sk3 . \nFILTER(xsd:datetime(?sk3) >= \"2010-01-01\"^^xsd:dateTime) })\n?x ns:sports.sports_team.championships ns:m.011pxy48 . \n}", 
        "compositionality_type": "conjunction", 
        "answers": [
            {
                "answer": "Real Madrid C.F.", 
                "answer_id": "m.06l22", 
                "aliases": [
                    "Real Madrid C.F. in European football", 
                    "Sociedad Madrid FC", 
                    "Los Merengues", 
                    "Los Vikingos", 
                    "Royal Madrid Football Club", 
                    "Real Madrid", 
                    "Madrid Football Club", 
                    "Real Madrid Club de F\u00fatbol", 
                    "Los Blancos"
                ]
            }
        ], 
        "created": "2018-02-13T04:52:52"
    }, 
    {
        "ID": "WebQTest-778_9b83e7db541fb90179c5548f5c44c57c", 
        "webqsp_ID": "WebQTest-778", 
        "webqsp_question": "what was jesse owens education", 
        "machine_question": "what was jesse owens education and the educational institution newspaper is UWeekly", 
        "question": "The UWeekly newspaper is of which educational institution Jesse Owens attended?", 
        "sparql": "PREFIX ns: <http://rdf.freebase.com/ns/>\nSELECT DISTINCT ?x\nWHERE {\nFILTER (?x != ns:m.0cmr3)\nFILTER (!isLiteral(?x) OR lang(?x) = '' OR langMatches(lang(?x), 'en'))\nns:m.0cmr3 ns:people.person.education ?y .\n?y ns:education.education.institution ?x .\n?x ns:education.educational_institution.newspaper ns:m.02r_7gn . \n}", 
        "compositionality_type": "conjunction", 
        "answers": [
            {
                "answer": "Ohio State University", 
                "answer_id": "m.05krk", 
                "aliases": [
                    "Ohio State", 
                    "Ohio State University, main campus", 
                    "Ohio State University, Columbus", 
                    "OSU", 
                    "The Ohio State University"
                ]
            }
        ], 
        "created": "2018-02-13T04:08:36"
    }, 
    {
        "ID": "WebQTrn-2856_6e5be4d501174031f59355283efccdef", 
        "webqsp_ID": "WebQTrn-2856", 
        "webqsp_question": "what countries in the world speak arabic", 
        "machine_question": "what countries in the world speak arabic and the currency used in the country is Lebanese pound", 
        "question": "What Arabic-speaking country uses the Lebanese Pound currency?", 
        "sparql": "PREFIX ns: <http://rdf.freebase.com/ns/>\nSELECT DISTINCT ?x\nWHERE {\nFILTER (?x != ns:m.0jzc)\nFILTER (!isLiteral(?x) OR lang(?x) = '' OR langMatches(lang(?x), 'en'))\nns:m.0jzc ns:language.human_language.countries_spoken_in ?x .\n?x ns:location.country.currency_used ns:m.025tsrc . \n}", 
        "compositionality_type": "conjunction", 
        "answers": [
            {
                "answer": "Lebanon", 
                "answer_id": "m.04hqz", 
                "aliases": []
            }
        ], 
        "created": "2018-02-13T00:48:16"
    }, 
    {
        "ID": "WebQTrn-1999_92f2cf43c174d40942f1c72ba13096e6", 
        "webqsp_ID": "WebQTrn-1999", 
        "webqsp_question": "what languages do people speak in switzerland", 
        "machine_question": "what languages do people speak in the country that has the national anthem Swiss Psalm", 
        "question": "What languages are spoken in the country that has national anthem Swiss Psalm?", 
        "sparql": "PREFIX ns: <http://rdf.freebase.com/ns/>\nSELECT DISTINCT ?x\nWHERE {\nFILTER (?x != ?c)\nFILTER (!isLiteral(?x) OR lang(?x) = '' OR langMatches(lang(?x), 'en'))\n?c ns:location.country.national_anthem ?k .\n?k ns:government.national_anthem_of_a_country.anthem ns:m.01jhkt . \n?c ns:location.country.languages_spoken ?x .\n}\n", 
        "compositionality_type": "composition", 
        "answers": [
            {
                "answer": "Italian Language", 
                "answer_id": "m.02bjrlw", 
                "aliases": [
                    "Italiano", 
                    "Italian"
                ]
            }, 
            {
                "answer": "German Language", 
                "answer_id": "m.04306rv", 
                "aliases": [
                    "German, Standard Language", 
                    "Deutsch", 
                    "German", 
                    "Tedesco", 
                    "High German", 
                    "Hochdeutsch", 
                    "German, Standard"
                ]
            }, 
            {
                "answer": "French", 
                "answer_id": "m.064_8sq", 
                "aliases": [
                    "Francais", 
                    "Fran\u00e7ais", 
                    "French", 
                    "French language"
                ]
            }, 
            {
                "answer": "Romansh language", 
                "answer_id": "m.06ctk", 
                "aliases": [
                    "Rhaeto-romance", 
                    "Romanche", 
                    "Romansh", 
                    "Rheto-romance"
                ]
            }
        ], 
        "created": "2018-02-12T23:14:56"
    }, 
    {
        "ID": "WebQTest-937_4f6b8f36a3d6bd343c713351dfa1837a", 
        "webqsp_ID": "WebQTest-937", 
        "webqsp_question": "where are people who speak arabic from", 
        "machine_question": "where are people who speak arabic from and is the location that contains the city/town Sulaymaniyah", 
        "question": "In what location containing the city/town of Sulaymaniyah do people speak Arabic?", 
        "sparql": "PREFIX ns: <http://rdf.freebase.com/ns/>\nSELECT DISTINCT ?x\nWHERE {\nFILTER (?x != ns:m.0jzc)\nFILTER (!isLiteral(?x) OR lang(?x) = '' OR langMatches(lang(?x), 'en'))\nns:m.0jzc ns:language.human_language.countries_spoken_in ?x .\n?x ns:location.location.contains ?c .\n?c ns:location.mailing_address.citytown ns:m.02_wp3 . \n}", 
        "compositionality_type": "conjunction", 
        "answers": [
            {
                "answer": "Iraq", 
                "answer_id": "m.0d05q4", 
                "aliases": []
            }
        ], 
        "created": "2018-02-13T04:26:13"
    }, 
    {
        "ID": "WebQTrn-2706_958676d1afb9f2d55dc274e103a09a32", 
        "webqsp_ID": "WebQTrn-2706", 
        "webqsp_question": "what years did the red sox win the world series", 
        "machine_question": "what years did the the team won the 2004 World Series championship win the world series", 
        "question": "In what years has the sports team that won the 2004 World Series championship won the World Series?", 
        "sparql": "PREFIX ns: <http://rdf.freebase.com/ns/>\nSELECT DISTINCT ?x\nWHERE {\nFILTER (?x != ?c)\nFILTER (!isLiteral(?x) OR lang(?x) = '' OR langMatches(lang(?x), 'en'))\n?c ns:sports.sports_team.championships ns:m.044ym6 . \n?c ns:sports.sports_team.championships ?x .\n}\n", 
        "compositionality_type": "composition", 
        "answers": [
            {
                "answer": "1903 World Series", 
                "answer_id": "m.018n8", 
                "aliases": [
                    "1903 World"
                ]
            }, 
            {
                "answer": "2007 World Series", 
                "answer_id": "m.0268bkj", 
                "aliases": [
                    "2007 World"
                ]
            }, 
            {
                "answer": "2004 World Series", 
                "answer_id": "m.044ym6", 
                "aliases": [
                    "2004 World"
                ]
            }, 
            {
                "answer": "1918 World Series", 
                "answer_id": "m.0469hv", 
                "aliases": [
                    "1918 World"
                ]
            }, 
            {
                "answer": "1912 World Series", 
                "answer_id": "m.04tf98", 
                "aliases": [
                    "1912 World"
                ]
            }, 
            {
                "answer": "1916 World Series", 
                "answer_id": "m.04tg7d", 
                "aliases": [
                    "1916 World"
                ]
            }, 
            {
                "answer": "1915 World Series", 
                "answer_id": "m.04tg7r", 
                "aliases": [
                    "1915 World"
                ]
            }, 
            {
                "answer": "2013 World Series", 
                "answer_id": "m.0ds324c", 
                "aliases": [
                    "2013 World"
                ]
            }
        ], 
        "created": "2018-02-13T00:29:25"
    }, 
    {
        "ID": "WebQTest-1675_af7076c59200f1aec5ee4fbfee7ffff1", 
        "webqsp_ID": "WebQTest-1675", 
        "webqsp_question": "where do the appalachian mountains run through", 
        "machine_question": "where do the appalachian mountains run through and the country capital is Saint-Pierre", 
        "question": "Where in the country with capital city Saint-Pierre that Appalachian Mountains run through?", 
        "sparql": "PREFIX ns: <http://rdf.freebase.com/ns/>\nSELECT DISTINCT ?x\nWHERE {\nFILTER (?x != ns:m.0lm0n)\nFILTER (!isLiteral(?x) OR lang(?x) = '' OR langMatches(lang(?x), 'en'))\nns:m.0lm0n ns:location.location.partially_containedby ?x .\n?x ns:location.country.capital ns:m.07c1jq . \n}", 
        "compositionality_type": "conjunction", 
        "answers": [
            {
                "answer": "Saint Pierre and Miquelon", 
                "answer_id": "m.06s4c", 
                "aliases": [
                    "Collectivite Territoriale De Saint-Pierre Et Miquelon", 
                    "Territoire De Saint Pierre Et Miquelon", 
                    "Territory Of Saint Pierre And Miquelon", 
                    "Department Of Saint Pierre And Miquelon", 
                    "Collectivit\u00e9 Territoriale De Saint-Pierre Et Miquelon", 
                    "Saint-Pierre Et Miquelon", 
                    "Territoire Des \u00celes Saint-Pierre Et Miquelon", 
                    "Departement De Saint-Pierre Et Miquelon", 
                    "St. Pierre & Miquelon", 
                    "D\u00e9partement De Saint-Pierre Et Miquelon", 
                    "Territoire Des Iles Saint-Pierre Et Miquelon"
                ]
            }
        ], 
        "created": "2018-02-13T05:45:54"
    }, 
    {
        "ID": "WebQTrn-1964_a24b8d71d20499c6d7e568317f526a91", 
        "webqsp_ID": "WebQTrn-1964", 
        "webqsp_question": "what language does the country italy speak", 
        "machine_question": "what language does the country the location that contains the city/town Rome speak", 
        "question": "What language is spoken in the country that includes Rome as one of their cities?", 
        "sparql": "PREFIX ns: <http://rdf.freebase.com/ns/>\nSELECT DISTINCT ?x\nWHERE {\nFILTER (?x != ?c)\nFILTER (!isLiteral(?x) OR lang(?x) = '' OR langMatches(lang(?x), 'en'))\n?c ns:location.location.contains ?k .\n?k ns:location.mailing_address.citytown ns:m.06c62 . \n?c ns:location.country.official_language ?x .\n}\n", 
        "compositionality_type": "composition", 
        "answers": [
            {
                "answer": "Italian Language", 
                "answer_id": "m.02bjrlw", 
                "aliases": [
                    "Italiano", 
                    "Italian"
                ]
            }
        ], 
        "created": "2018-02-12T23:12:43"
    }, 
    {
        "ID": "WebQTest-777_70564f9c9bf7bfd591a1683cdb99abd4", 
        "webqsp_ID": "WebQTest-777", 
        "webqsp_question": "where is the main headquarters of google", 
        "machine_question": "where is the main headquarters of the child organization is Google Cloud Platform", 
        "question": "Where is the main headquarters of the child organization of the Google Cloud Platform?", 
        "sparql": "PREFIX ns: <http://rdf.freebase.com/ns/>\nSELECT DISTINCT ?x\nWHERE {\nFILTER (?x != ?c)\nFILTER (!isLiteral(?x) OR lang(?x) = '' OR langMatches(lang(?x), 'en'))\n?c ns:organization.organization.child ?k .\n?k ns:organization.organization_relationship.child ns:m.0105pbj4 . \n?c ns:organization.organization.headquarters ?y .\n?y ns:location.mailing_address.citytown ?x .\n}\n", 
        "compositionality_type": "composition", 
        "answers": [
            {
                "answer": "Mountain View", 
                "answer_id": "m.0r6c4", 
                "aliases": [
                    "Santa Clara County / Mountain View city", 
                    "Mountain View, Santa Clara County, California", 
                    "Mountain View, California"
                ]
            }
        ], 
        "created": "2018-02-13T04:08:34"
    }, 
    {
        "ID": "WebQTrn-60_bf5ce242e170352050a5b7308531e009", 
        "webqsp_ID": "WebQTrn-60", 
        "webqsp_question": "what countries do people speak portuguese", 
        "machine_question": "what countries do people speak portuguese and is the mechandise trade percent of gdp was 100.72", 
        "question": "What Portuguese country's mechandise trade percent of gdp was 100.72?", 
        "sparql": "PREFIX ns: <http://rdf.freebase.com/ns/>\nSELECT DISTINCT ?x\nWHERE {\nFILTER (?x != ns:m.05zjd)\nFILTER (!isLiteral(?x) OR lang(?x) = '' OR langMatches(lang(?x), 'en'))\nns:m.05zjd ns:language.human_language.countries_spoken_in ?x .\n?x ns:location.statistical_region.merchandise_trade_percent_of_gdp ?c .\n?c ns:measurement_unit.dated_percentage.rate \"100.72\" . \n}", 
        "compositionality_type": "conjunction", 
        "answers": [
            {
                "answer": "Equatorial Guinea", 
                "answer_id": "m.02kcz", 
                "aliases": []
            }
        ], 
        "created": "2018-02-12T19:43:48"
    }, 
    {
        "ID": "WebQTrn-60_039556a866f620ae9a1a72f96c22bae1", 
        "webqsp_ID": "WebQTrn-60", 
        "webqsp_question": "what countries do people speak portuguese", 
        "machine_question": "what countries do people speak portuguese and is the part time employment percent in 10.8", 
        "question": "What Portuguese speaking country that has part time employment of 10.8 percent?", 
        "sparql": "PREFIX ns: <http://rdf.freebase.com/ns/>\nSELECT DISTINCT ?x\nWHERE {\nFILTER (?x != ns:m.05zjd)\nFILTER (!isLiteral(?x) OR lang(?x) = '' OR langMatches(lang(?x), 'en'))\nns:m.05zjd ns:language.human_language.countries_spoken_in ?x .\n?x ns:location.statistical_region.part_time_employment_percent ?c .\n?c ns:measurement_unit.dated_percentage.rate \"10.8\" . \n}", 
        "compositionality_type": "conjunction", 
        "answers": [
            {
                "answer": "Macau", 
                "answer_id": "m.04thp", 
                "aliases": [
                    "Macao Special Administrative Region of the People's Republic of China", 
                    "Macao", 
                    "Macao SAR"
                ]
            }
        ], 
        "created": "2018-02-12T19:43:48"
    }, 
    {
        "ID": "WebQTest-723_9e457911e56fb0e6564dff89d6fed958", 
        "webqsp_ID": "WebQTest-723", 
        "webqsp_question": "what is there to see in sydney australia", 
        "machine_question": "what is there to see in sydney australia and is the zoo that opened on 2006", 
        "question": "What's there to see in Sydney, Australia, where the zoo that opened in 2006?", 
        "sparql": "PREFIX ns: <http://rdf.freebase.com/ns/>\nSELECT DISTINCT ?x\nWHERE {\nFILTER (?x != ns:m.06y57)\nFILTER (!isLiteral(?x) OR lang(?x) = '' OR langMatches(lang(?x), 'en'))\nns:m.06y57 ns:travel.travel_destination.tourist_attractions ?x .\n?x ns:zoos.zoo.opened \"2006\"^^xsd:dateTime . \n}", 
        "compositionality_type": "conjunction", 
        "answers": [
            {
                "answer": "Wild Life Sydney", 
                "answer_id": "m.0261k3j", 
                "aliases": []
            }
        ], 
        "created": "2018-02-13T04:02:40"
    }, 
    {
        "ID": "WebQTest-1563_764ae1d91cb1b735786aaf7aafcc4aec", 
        "webqsp_ID": "WebQTest-1563", 
        "webqsp_question": "what are all the countries in north africa", 
        "machine_question": "what are all the countries in north africa and is the country that contains Red Sea", 
        "question": "What country in North Africa contains the Red Sea?", 
        "sparql": "PREFIX ns: <http://rdf.freebase.com/ns/>\nSELECT DISTINCT ?x\nWHERE {\nFILTER (?x != ns:m.05g2v)\nFILTER (!isLiteral(?x) OR lang(?x) = '' OR langMatches(lang(?x), 'en'))\nns:m.05g2v ns:location.location.contains ?x .\n?x ns:common.topic.notable_types ns:m.01mp .\n?x ns:location.country.administrative_divisions ns:m.039v6f . \n}", 
        "compositionality_type": "conjunction", 
        "answers": [
            {
                "answer": "Sudan", 
                "answer_id": "m.06tw8", 
                "aliases": [
                    "North Sudan", 
                    "Republic of the Sudan", 
                    "Jumh\u016br\u012byat as-S\u016bd\u0101n"
                ]
            }
        ], 
        "created": "2018-02-13T05:34:50"
    }, 
    {
        "ID": "WebQTest-1097_8e65d827de2fe8fd8b11773997effdf0", 
        "webqsp_ID": "WebQTest-1097", 
        "webqsp_question": "where did michelle obama graduated from", 
        "machine_question": "where did michelle obama graduated from and the educational institution newspaper is Nassau Weekly", 
        "question": "What educational institution thath has the Nassau Weekly newspaper did Obama graduate from?", 
        "sparql": "PREFIX ns: <http://rdf.freebase.com/ns/>\nSELECT DISTINCT ?x\nWHERE {\nFILTER (?x != ns:m.025s5v9)\nFILTER (!isLiteral(?x) OR lang(?x) = '' OR langMatches(lang(?x), 'en'))\nns:m.025s5v9 ns:people.person.education ?y .\n?y ns:education.education.institution ?x .\n?x ns:education.educational_institution.newspaper ns:m.08zwhp . \n}", 
        "compositionality_type": "conjunction", 
        "answers": [
            {
                "answer": "Princeton University", 
                "answer_id": "m.05zl0", 
                "aliases": [
                    "Princeton University, Borough of Princeton", 
                    "Princeton University, main campus", 
                    "Princeton"
                ]
            }
        ], 
        "created": "2018-02-13T04:41:49"
    }, 
    {
        "ID": "WebQTrn-353_af331f33579006dfcc57fbac05c58c9c", 
        "webqsp_ID": "WebQTrn-353", 
        "webqsp_question": "what did obama study in school", 
        "machine_question": "what did the person who once lived in White House study in school", 
        "question": "The person who once lived in White House studied what in school?", 
        "sparql": "PREFIX ns: <http://rdf.freebase.com/ns/>\nSELECT DISTINCT ?x\nWHERE {\nFILTER (?x != ?c)\nFILTER (!isLiteral(?x) OR lang(?x) = '' OR langMatches(lang(?x), 'en'))\n?c ns:people.person.places_lived ?k .\n?k ns:people.place_lived.location ns:m.081sq . \n?c ns:people.person.education ?y .\n?y ns:education.education.major_field_of_study ?x .\n}\n", 
        "compositionality_type": "composition", 
        "answers": [
            {
                "answer": "Political Science", 
                "answer_id": "m.062z7", 
                "aliases": []
            }
        ], 
        "created": "2018-02-12T20:16:41"
    }, 
    {
        "ID": "WebQTest-847_a1edafe051cb7bc171f2beb523d3a90c", 
        "webqsp_ID": "WebQTest-847", 
        "webqsp_question": "what countries are members of the security council", 
        "machine_question": "what countries are members of the security council and the currency used in the country is CFP franc", 
        "question": "Which nation whose currency is the CFP franc is part of the security council?",
[truncated: 4,892,960 more chars]
