# Supplementary material
Source: ML conference proceedings conference paper supplement (https://aclanthology.org/N18-1059)
Supplement: Datasets [file N18-1059.Datasets.zip › ComplexWebQuestions_test.json]

[
    {
        "ID": "WebQTest-1525_30f41f81fd258148ae2f78c4b5d81684", 
        "webqsp_ID": "WebQTest-1525", 
        "webqsp_question": "who were we fighting in the gulf war", 
        "machine_question": "who were we fighting in the gulf war and the currency used in the country is Argentine peso", 
        "question": "What country with the Argentine peso currenty were we fighting in the gulf war?", 
        "sparql": "PREFIX ns: <http://rdf.freebase.com/ns/>\nSELECT DISTINCT ?x\nWHERE {\nFILTER (?x != ns:m.018w0j)\nFILTER (!isLiteral(?x) OR lang(?x) = '' OR langMatches(lang(?x), 'en'))\nns:m.018w0j ns:military.military_conflict.combatants ?y .\n?y ns:military.military_combatant_group.combatants ?x .\n?x ns:location.country.currency_used ns:m.024nzm . \n}", 
        "compositionality_type": "conjunction", 
        "answers": [
            {
                "answer": "Argentina", 
                "answer_id": "m.0jgd", 
                "aliases": [
                    "The Argentine", 
                    "Agrentina ", 
                    "Argentine Republic"
                ]
            }
        ], 
        "created": "2018-02-13T05:31:14"
    }, 
    {
        "ID": "WebQTrn-78_0fe45e8b387a7890b52e2a8d1b72702d", 
        "webqsp_ID": "WebQTrn-78", 
        "webqsp_question": "what school did joan miro attend", 
        "machine_question": "what school did the illustrator of the book L'antit\u00c3\u00aate, vol. III: Le D\u00c3\u00a9sesp\u00c3\u00a9ranto attend", 
        "question": "What school did the contributor to art in the book  L'antit\u00c3\u00aate, vol. III: Le D\u00c3\u00a9sesp\u00c3\u00a9ranto attend?", 
        "sparql": "PREFIX ns: <http://rdf.freebase.com/ns/>\nSELECT DISTINCT ?x\nWHERE {\nFILTER (?x != ?c)\nFILTER (!isLiteral(?x) OR lang(?x) = '' OR langMatches(lang(?x), 'en'))\n?c ns:book.illustrator.books_illustrated ns:m.09byctl . \n?c ns:people.person.education ?y .\n?y ns:education.education.institution ?x .\n}\n", 
        "compositionality_type": "composition", 
        "answers": [
            {
                "answer": "Cercle Art\u00edstic de Sant Lluc", 
                "answer_id": "m.06w5jjm", 
                "aliases": []
            }
        ], 
        "created": "2018-02-12T19:45:23"
    }, 
    {
        "ID": "WebQTrn-282_0a1797c617f8e1eb87eab85b0790302e", 
        "webqsp_ID": "WebQTrn-282", 
        "webqsp_question": "what money does jamaica use", 
        "machine_question": "what money does the country that contains Saint Ann Parish use", 
        "question": "What currency is used in the country with Saint Ann Parish?", 
        "sparql": "PREFIX ns: <http://rdf.freebase.com/ns/>\nSELECT DISTINCT ?x\nWHERE {\nFILTER (?x != ?c)\nFILTER (!isLiteral(?x) OR lang(?x) = '' OR langMatches(lang(?x), 'en'))\n?c ns:location.country.administrative_divisions ns:m.02mzmt . \n?c ns:location.country.currency_used ?x .\n}\n", 
        "compositionality_type": "composition", 
        "answers": [
            {
                "answer": "Jamaican dollar", 
                "answer_id": "m.04xc2m", 
                "aliases": []
            }
        ], 
        "created": "2018-02-12T20:11:20"
    }, 
    {
        "ID": "WebQTrn-1447_6b46bf8ab0a162497f6fa69398ce4040", 
        "webqsp_ID": "WebQTrn-1447", 
        "webqsp_question": "who did the cleveland browns draft", 
        "machine_question": "who did the cleveland browns draft and is the player started his career on earliest", 
        "question": "Who that was drafted by the Cleveland Browns started his career earliest?", 
        "sparql": "PREFIX ns: <http://rdf.freebase.com/ns/>\nSELECT DISTINCT ?x\nWHERE {\nFILTER (?x != ns:m.01xvb)\nFILTER (!isLiteral(?x) OR lang(?x) = '' OR langMatches(lang(?x), 'en'))\nns:m.01xvb ns:sports.professional_sports_team.draft_picks ?y .\n?y ns:sports.sports_league_draft_pick.player ?x .\n?x ns:sports.pro_athlete.sports_played_professionally ?c .\n?c ns:sports.pro_sports_played.career_start ?num .\n}\nORDER BY ?num LIMIT 1", 
        "compositionality_type": "superlative", 
        "answers": [
            {
                "answer": "Jeff Faine", 
                "answer_id": "m.0bdv4h", 
                "aliases": [
                    "Jeffrey Kalei Faine"
                ]
            }
        ], 
        "created": "2018-02-12T22:18:56"
    }, 
    {
        "ID": "WebQTest-85_fc6b561e4945b3a97b5663b2d3d4aa58", 
        "webqsp_ID": "WebQTest-85", 
        "webqsp_question": "who are the colorado representatives", 
        "machine_question": "who are the colorado representatives and held his govermental position from latest", 
        "question": "Who is the Colorado representatives that had his government position from the latest?", 
        "sparql": "PREFIX ns: <http://rdf.freebase.com/ns/>\nSELECT DISTINCT ?x\nWHERE {\nFILTER (?x != ns:m.01n4w)\nFILTER (!isLiteral(?x) OR lang(?x) = '' OR langMatches(lang(?x), 'en'))\nns:m.01n4w ns:government.political_district.representatives ?y .\n?y ns:government.government_position_held.office_holder ?x .\nFILTER(NOT EXISTS {?y ns:government.government_position_held.from ?sk0} || \nEXISTS {?y ns:government.government_position_held.from ?sk1 . \nFILTER(xsd:datetime(?sk1) <= \"2015-08-10\"^^xsd:dateTime) })\nFILTER(NOT EXISTS {?y ns:government.government_position_held.to ?sk2} || \nEXISTS {?y ns:government.government_position_held.to ?sk3 . \nFILTER(xsd:datetime(?sk3) >= \"2015-08-10\"^^xsd:dateTime) })\n?x ns:government.politician.government_positions_held ?c .\n?c ns:government.government_position_held.from ?num .\n}\nORDER BY DESC(?num) LIMIT 1", 
        "compositionality_type": "superlative", 
        "answers": [
            {
                "answer": "Michael Bennet", 
                "answer_id": "m.05b60qf", 
                "aliases": []
            }
        ], 
        "created": "2018-02-13T02:45:11"
    }, 
    {
        "ID": "WebQTest-1819_eab10d256bdc3a16f2e31279f9e311c3", 
        "webqsp_ID": "WebQTest-1819", 
        "webqsp_question": "what religion does canada follow", 
        "machine_question": "what religion does canada follow and the religion notable figure is Ali", 
        "question": "What religion practiced in Canada has a notable religious figure named Ali?", 
        "sparql": "PREFIX ns: <http://rdf.freebase.com/ns/>\nSELECT DISTINCT ?x\nWHERE {\nFILTER (?x != ns:m.0d060g)\nFILTER (!isLiteral(?x) OR lang(?x) = '' OR langMatches(lang(?x), 'en'))\nns:m.0d060g ns:location.statistical_region.religions ?y .\n?y ns:location.religion_percentage.religion ?x .\n?x ns:religion.religion.notable_figures ns:m.024c1p . \n}", 
        "compositionality_type": "conjunction", 
        "answers": [
            {
                "answer": "Islam", 
                "answer_id": "m.0flw86", 
                "aliases": []
            }
        ], 
        "created": "2018-02-13T06:04:24"
    }, 
    {
        "ID": "WebQTrn-24_c071c552853eb739a0ff0c67bb9ed366", 
        "webqsp_ID": "WebQTrn-24", 
        "webqsp_question": "what form of government does russia have today", 
        "machine_question": "what form of government does the location that appointed Dmitry Medvedev to govermental position have today", 
        "question": "What is the current government type in the area where Dmitry Medvedev was appointed to a government position?", 
        "sparql": "PREFIX ns: <http://rdf.freebase.com/ns/>\nSELECT DISTINCT ?x\nWHERE {\nFILTER (?x != ?c)\nFILTER (!isLiteral(?x) OR lang(?x) = '' OR langMatches(lang(?x), 'en'))\n?c ns:government.governmental_jurisdiction.governing_officials ?k .\n?k ns:government.government_position_held.appointed_by ns:m.08wdkk . \n?c ns:location.country.form_of_government ?x .\n}\n", 
        "compositionality_type": "composition", 
        "answers": [
            {
                "answer": "Semi-presidential system", 
                "answer_id": "m.01dw03", 
                "aliases": [
                    "Semi-presidential"
                ]
            }, 
            {
                "answer": "Constitutional republic", 
                "answer_id": "m.0c9rw5", 
                "aliases": [
                    "Constitutional"
                ]
            }, 
            {
                "answer": "Federal republic", 
                "answer_id": "m.0j729", 
                "aliases": [
                    "Federal"
                ]
            }
        ], 
        "created": "2018-02-12T19:40:58"
    }, 
    {
        "ID": "WebQTrn-2509_e04d0ee5dcbfd8b2dbb1e8be247e94d4", 
        "webqsp_ID": "WebQTrn-2509", 
        "webqsp_question": "where did robert hooke get his education", 
        "machine_question": "where did robert hooke get his education and is the education institution has a sports team named Oxford University RFC", 
        "question": "At what place of higher learning where you'd find the Oxford University RFC team did Robert Hooke receive an education?", 
        "sparql": "PREFIX ns: <http://rdf.freebase.com/ns/>\nSELECT DISTINCT ?x\nWHERE {\nFILTER (?x != ns:m.0d6j4)\nFILTER (!isLiteral(?x) OR lang(?x) = '' OR langMatches(lang(?x), 'en'))\nns:m.0d6j4 ns:people.person.education ?y .\n?y ns:education.education.institution ?x .\n?x ns:education.educational_institution.sports_teams ns:m.02677jr . \n}", 
        "compositionality_type": "conjunction", 
        "answers": [
            {
                "answer": "University of Oxford", 
                "answer_id": "m.07tgn", 
                "aliases": [
                    "Universitas Oxoniensis", 
                    "Oxford University"
                ]
            }
        ], 
        "created": "2018-02-13T00:03:42"
    }, 
    {
        "ID": "WebQTrn-2505_14f7e9324d83d176c3831d682932bd02", 
        "webqsp_ID": "WebQTrn-2505", 
        "webqsp_question": "what is vanderbilt university mascot", 
        "machine_question": "what is the education institution has a sports team named Vanderbilt Commodores football mascot", 
        "question": "What is the name of the Team mascot who cheers on the Vanderbilt Commodores football team?", 
        "sparql": "PREFIX ns: <http://rdf.freebase.com/ns/>\nSELECT DISTINCT ?x\nWHERE {\nFILTER (?x != ?c)\nFILTER (!isLiteral(?x) OR lang(?x) = '' OR langMatches(lang(?x), 'en'))\n?c ns:education.educational_institution.sports_teams ns:m.026v18h . \n?c ns:education.educational_institution.mascot ?x .\n}\n", 
        "compositionality_type": "composition", 
        "answers": [
            {
                "answer": "Vanderbilt University Mr. Commodore", 
                "answer_id": "m.05k6hxh", 
                "aliases": []
            }
        ], 
        "created": "2018-02-13T00:03:35"
    }, 
    {
        "ID": "WebQTrn-3308_bd14529a374484364751d86b5e8bda92", 
        "webqsp_ID": "WebQTrn-3308", 
        "webqsp_question": "what countries do new zealand export to", 
        "machine_question": "what countries do new zealand export to and the location time zone is Casey Time Zone", 
        "question": "What country in Casey Time Zone does New Zealand export to?", 
        "sparql": "PREFIX ns: <http://rdf.freebase.com/ns/>\nSELECT DISTINCT ?x\nWHERE {\nFILTER (?x != ns:m.0ctw_b)\nFILTER (!isLiteral(?x) OR lang(?x) = '' OR langMatches(lang(?x), 'en'))\nns:m.0ctw_b ns:location.statistical_region.places_exported_to ?y .\n?y ns:location.imports_and_exports.exported_to ?x .\n?x ns:location.location.time_zones ns:m.0y498qn . \n}", 
        "compositionality_type": "conjunction", 
        "answers": [
            {
                "answer": "Australia", 
                "answer_id": "m.0chghy", 
                "aliases": [
                    "The Commonwealth of Australia", 
                    "Commonwealth of Australia"
                ]
            }
        ], 
        "created": "2018-02-13T01:37:24"
    }, 
    {
        "ID": "WebQTrn-826_7918a7c36c21724d9786a467d6c24e78", 
        "webqsp_ID": "WebQTrn-826", 
        "webqsp_question": "what kind of money does the philippines use", 
        "machine_question": "what kind of money does the the country that contains Southern Leyte use", 
        "question": "What currency is used by the country containing Southern Leyte?", 
        "sparql": "PREFIX ns: <http://rdf.freebase.com/ns/>\nSELECT DISTINCT ?x\nWHERE {\nFILTER (?x != ?c)\nFILTER (!isLiteral(?x) OR lang(?x) = '' OR langMatches(lang(?x), 'en'))\n?c ns:location.country.administrative_divisions ns:m.01kn62 . \n?c ns:location.country.currency_used ?x .\n}\n", 
        "compositionality_type": "composition", 
        "answers": [
            {
                "answer": "Philippine peso", 
                "answer_id": "m.01h5bw", 
                "aliases": []
            }
        ], 
        "created": "2018-02-12T21:05:37"
    }, 
    {
        "ID": "WebQTrn-3625_17f36ed95166fa2ad474e7cd39f8a724", 
        "webqsp_ID": "WebQTrn-3625", 
        "webqsp_question": "where is united arab located", 
        "machine_question": "where is united arab located and the location time zone is Japan Time Zone", 
        "question": "What area in the Japan timezone is United Arab located in?", 
        "sparql": "PREFIX ns: <http://rdf.freebase.com/ns/>\nSELECT DISTINCT ?x\nWHERE {\nFILTER (?x != ns:m.0j1z8)\nFILTER (!isLiteral(?x) OR lang(?x) = '' OR langMatches(lang(?x), 'en'))\nns:m.0j1z8 ns:location.location.containedby ?x .\n?x ns:location.location.time_zones ns:m.019rdm . \n}", 
        "compositionality_type": "conjunction", 
        "answers": [
            {
                "answer": "Asia", 
                "answer_id": "m.0j0k", 
                "aliases": []
            }
        ], 
        "created": "2018-02-13T02:16:51"
    }, 
    {
        "ID": "WebQTrn-3042_44d10e2e80ac00571ec9de854e7e4916", 
        "webqsp_ID": "WebQTrn-3042", 
        "webqsp_question": "what is phoebe halliwell 's real name", 
        "machine_question": "what is phoebe halliwell 's real name and is the person notable with the medical condition Hyperactivity", 
        "question": "What is Phoebe Halliwell's real name, and the person that has the medical condition Hyperactivity?", 
        "sparql": "PREFIX ns: <http://rdf.freebase.com/ns/>\nSELECT DISTINCT ?x\nWHERE {\nFILTER (?x != ns:m.01ymly)\nFILTER (!isLiteral(?x) OR lang(?x) = '' OR langMatches(lang(?x), 'en'))\nns:m.01ymly ns:tv.tv_character.appeared_in_tv_episodes ?y .\n?y ns:tv.tv_guest_role.actor ?x .\n?x ns:medicine.notable_person_with_medical_condition.condition ns:m.04txf7 . \n}", 
        "compositionality_type": "conjunction", 
        "answers": [
            {
                "answer": "Alyssa Milano", 
                "answer_id": "m.01pw2f1", 
                "aliases": [
                    "Alyssa Jayne Milano", 
                    "Conan", 
                    "Lyssa", 
                    "Lyss", 
                    "Ally", 
                    "Lyssie"
                ]
            }
        ], 
        "created": "2018-02-13T01:07:35"
    }, 
    {
        "ID": "WebQTrn-3593_e2d0a989896f895a4091091341e06fe6", 
        "webqsp_ID": "WebQTrn-3593", 
        "webqsp_question": "who plays kermit in the muppets movie", 
        "machine_question": "who plays kermit in the film has a charcter named Rowlf Moopet", 
        "question": "In the movie with the character Rowlf Moopet, who plays Kermit?", 
        "sparql": "PREFIX ns: <http://rdf.freebase.com/ns/>\nSELECT DISTINCT ?x\nWHERE {\nFILTER (?x != ?c)\nFILTER (!isLiteral(?x) OR lang(?x) = '' OR langMatches(lang(?x), 'en'))\n?c ns:film.film.starring ?k .\n?k ns:film.performance.character ns:m.0y84tz8 . \n?c ns:film.film.starring ?y .\n?y ns:film.performance.actor ?x .\n?y ns:film.performance.character ns:m.04bsc .\n}\n", 
        "compositionality_type": "composition", 
        "answers": [
            {
                "answer": "Steve Whitmire", 
                "answer_id": "m.03gsjv", 
                "aliases": [
                    "Beaker", 
                    "Steven \"Steve\" Whitmire", 
                    "Steven Whitmire", 
                    "Kermit", 
                    "Statler", 
                    "Kermit the Frog/Statler", 
                    "Rizzo the Rat", 
                    "Steven Lawrence Whitmire", 
                    "Kermit the Frog", 
                    "Rizzo the Rat Statler & Waldorf"
                ]
            }
        ], 
        "created": "2018-02-13T02:13:59"
    }, 
    {
        "ID": "WebQTrn-905_4a6b955be3b30ed49c3bd17e73b8f009", 
        "webqsp_ID": "WebQTrn-905", 
        "webqsp_question": "who is the prime minister of new zealand now", 
        "machine_question": "who is the prime minister of the country that contains Cook Islands now", 
        "question": "Who is the prime minister of the country that has Cook Islands?", 
        "sparql": "PREFIX ns: <http://rdf.freebase.com/ns/>\nSELECT DISTINCT ?x\nWHERE {\nFILTER (?x != ?c)\nFILTER (!isLiteral(?x) OR lang(?x) = '' OR langMatches(lang(?x), 'en'))\n?c ns:location.country.administrative_divisions ns:m.020p1 . \n?c ns:government.governmental_jurisdiction.governing_officials ?y .\n?y ns:government.government_position_held.office_holder ?x .\n?y ns:government.government_position_held.basic_title ns:m.060bp .\nFILTER(NOT EXISTS {?y ns:government.government_position_held.from ?sk0} || \nEXISTS {?y ns:government.government_position_held.from ?sk1 . \nFILTER(xsd:datetime(?sk1) <= \"2015-08-10\"^^xsd:dateTime) })\nFILTER(NOT EXISTS {?y ns:government.government_position_held.to ?sk2} || \nEXISTS {?y ns:government.government_position_held.to ?sk3 . \nFILTER(xsd:datetime(?sk3) >= \"2015-08-10\"^^xsd:dateTime) })\n}\n", 
        "compositionality_type": "composition", 
        "answers": [
            {
                "answer": "John Key", 
                "answer_id": "m.043tfg", 
                "aliases": [
                    "John Phillip Key", 
                    "PM"
                ]
            }
        ], 
        "created": "2018-02-12T21:19:25"
    }, 
    {
        "ID": "WebQTrn-884_a14736a9029ef9c1c901582bd76744d0", 
        "webqsp_ID": "WebQTrn-884", 
        "webqsp_question": "what countries in north america continent", 
        "machine_question": "what countries in north america continent and is the country that contains Gon\u00c3\u00a2ve Island", 
        "question": "What is the country that contains Gonave Island?", 
        "sparql": "PREFIX ns: <http://rdf.freebase.com/ns/>\nSELECT DISTINCT ?x\nWHERE {\nFILTER (?x != ns:m.059g4)\nFILTER (!isLiteral(?x) OR lang(?x) = '' OR langMatches(lang(?x), 'en'))\nns:m.059g4 ns:base.locations.continents.countries_within ?x .\n?x ns:location.country.administrative_divisions ns:m.0100qn3h . \n}", 
        "compositionality_type": "conjunction", 
        "answers": [
            {
                "answer": "Haiti", 
                "answer_id": "m.03gyl", 
                "aliases": [
                    "Republic of Haiti", 
                    "Ha\u00efti"
                ]
            }
        ], 
        "created": "2018-02-12T21:18:19"
    }, 
    {
        "ID": "WebQTrn-1015_daccf120246aa5dfbc6a8ef28607c7ac", 
        "webqsp_ID": "WebQTrn-1015", 
        "webqsp_question": "what was nicolaus copernicus occupation", 
        "machine_question": "what was the person who once lived in Frombork occupation", 
        "question": "What was the occupation of the famous person who lived in Frombork?", 
        "sparql": "PREFIX ns: <http://rdf.freebase.com/ns/>\nSELECT DISTINCT ?x\nWHERE {\nFILTER (?x != ?c)\nFILTER (!isLiteral(?x) OR lang(?x) = '' OR langMatches(lang(?x), 'en'))\n?c ns:people.person.places_lived ?k .\n?k ns:people.place_lived.location ns:m.0hvz8 . \n?c ns:people.person.profession ?x .\n}\n", 
        "compositionality_type": "composition", 
        "answers": [
            {
                "answer": "Mathematician", 
                "answer_id": "m.04s2z", 
                "aliases": []
            }, 
            {
                "answer": "Physician", 
                "answer_id": "m.05t4q", 
                "aliases": [
                    "Medical Doctor", 
                    "Registered medical practitioner", 
                    "Doctor"
                ]
            }, 
            {
                "answer": "Diplomat", 
                "answer_id": "m.080ntlp", 
                "aliases": []
            }, 
            {
                "answer": "Economist", 
                "answer_id": "m.0frz0", 
                "aliases": [
                    "Economist"
                ]
            }, 
            {
                "answer": "Astronomer", 
                "answer_id": "m.0h9c", 
                "aliases": [
                    "astronomer"
                ]
            }, 
            {
                "answer": "Artist", 
                "answer_id": "m.0n1h", 
                "aliases": []
            }
        ], 
        "created": "2018-02-12T21:31:21"
    }, 
    {
        "ID": "WebQTest-1237_74164763921f04499f87c47b191c44f1", 
        "webqsp_ID": "WebQTest-1237", 
        "webqsp_question": "who did shaq first play for", 
        "machine_question": "who did the person education institution is Robert G. Cole Junior-Senior High School first play for", 
        "question": "What basketball team did the person who attended Robert G. Cole Junior High School first play for?", 
        "sparql": "PREFIX ns: <http://rdf.freebase.com/ns/>\nSELECT DISTINCT ?x\nWHERE {\nFILTER (?x != ?c)\nFILTER (!isLiteral(?x) OR lang(?x) = '' OR langMatches(lang(?x), 'en'))\n?c ns:people.person.education ?k .\n?k ns:education.education.institution ns:m.04r1zr . \n?c ns:sports.drafted_athlete.drafted ?y .\n?y ns:sports.sports_league_draft_pick.team ?x .\n}\n", 
        "compositionality_type": "composition", 
        "answers": [
            {
                "answer": "Orlando Magic", 
                "answer_id": "m.0jm4b", 
                "aliases": [
                    "Magic"
                ]
            }
        ], 
        "created": "2018-02-13T04:56:06"
    }, 
    {
        "ID": "WebQTest-1563_3e551709e23323cde0a42d5bb41f9d50", 
        "webqsp_ID": "WebQTest-1563", 
        "webqsp_question": "what are all the countries in north africa", 
        "machine_question": "what are all the countries in north africa and the country capital is Cairo", 
        "question": "Which country in North Africa is Cairo the capial of?", 
        "sparql": "PREFIX ns: <http://rdf.freebase.com/ns/>\nSELECT DISTINCT ?x\nWHERE {\nFILTER (?x != ns:m.05g2v)\nFILTER (!isLiteral(?x) OR lang(?x) = '' OR langMatches(lang(?x), 'en'))\nns:m.05g2v ns:location.location.contains ?x .\n?x ns:common.topic.notable_types ns:m.01mp .\n?x ns:location.country.capital ns:m.01w2v . \n}", 
        "compositionality_type": "conjunction", 
        "answers": [
            {
                "answer": "United Arab Republic", 
                "answer_id": "m.0c75f", 
                "aliases": []
            }
        ], 
        "created": "2018-02-13T05:34:50"
    }, 
    {
        "ID": "WebQTest-63_7b15aad70d3bdb4588073f0ba98a3679", 
        "webqsp_ID": "WebQTest-63", 
        "webqsp_question": "who was vp for lincoln", 
        "machine_question": "who was vp for lincoln and held his govermental position from after 1861-03-04", 
        "question": "Which men held government posts as VP for Lincoln after 1861-03-04?", 
        "sparql": "PREFIX ns: <http://rdf.freebase.com/ns/>\nSELECT DISTINCT ?x\nWHERE {\nFILTER (?x != ns:m.0gzh)\nFILTER (!isLiteral(?x) OR lang(?x) = '' OR langMatches(lang(?x), 'en'))\nns:m.0gzh ns:government.us_president.vice_president ?x .\n?x ns:government.politician.government_positions_held ?c .\n?c ns:government.government_position_held.from ?num .\nFILTER (?num > \"1861-03-04\"^^xsd:dateTime) . \n}", 
        "compositionality_type": "comparative", 
        "answers": [
            {
                "answer": "Andrew Johnson", 
                "answer_id": "m.0rmg", 
                "aliases": [
                    "Andy Johnson"
                ]
            }, 
            {
                "answer": "Hannibal Hamlin", 
                "answer_id": "m.03mpk", 
                "aliases": []
            }
        ], 
        "created": "2018-02-13T02:43:23"
    }, 
    {
        "ID": "WebQTrn-764_0d1fac8801614cb30f72c3cab3b21e29", 
        "webqsp_ID": "WebQTrn-764", 
        "webqsp_question": "who was the colts coach in 2011", 
        "machine_question": "who was the the team has a team moscot named Indianapolis Colts Blue coach in 2011", 
        "question": "Who was the coach of the team with mascot named Indianapolis Colts Blue in 2011?", 
        "sparql": "PREFIX ns: <http://rdf.freebase.com/ns/>\nSELECT DISTINCT ?x\nWHERE {\nFILTER (?x != ?c)\nFILTER (!isLiteral(?x) OR lang(?x) = '' OR langMatches(lang(?x), 'en'))\n?c ns:sports.sports_team.team_mascot ns:m.0272cxc . \n?c ns:american_football.football_team.historical_coaching_staff ?y .\n?y ns:american_football.football_historical_coach_position.coach ?x .\nFILTER(NOT EXISTS {?y ns:american_football.football_historical_coach_position.from ?sk0} || \nEXISTS {?y ns:american_football.football_historical_coach_position.from ?sk1 . \nFILTER(xsd:datetime(?sk1) <= \"2011-12-31\"^^xsd:dateTime) })\nFILTER(NOT EXISTS {?y ns:american_football.football_historical_coach_position.to ?sk2} || \nEXISTS {?y ns:american_football.football_historical_coach_position.to ?sk3 . \nFILTER(xsd:datetime(?sk3) >= \"2011-01-01\"^^xsd:dateTime) })\n}\n", 
        "compositionality_type": "composition", 
        "answers": [
            {
                "answer": "Jim Caldwell", 
                "answer_id": "m.0bjdtb", 
                "aliases": []
            }
        ], 
        "created": "2018-02-12T21:00:37"
    }, 
    {
        "ID": "WebQTrn-1812_380d57299109c7ae18f10e52204fc0c3", 
        "webqsp_ID": "WebQTrn-1812", 
        "webqsp_question": "what countries are in the caribbean", 
        "machine_question": "what countries are in the caribbean and the currency used in the country is Euro", 
        "question": "Which countries in the Caribbean use the Euro?", 
        "sparql": "PREFIX ns: <http://rdf.freebase.com/ns/>\nSELECT DISTINCT ?x\nWHERE {\nFILTER (?x != ns:m.0261m)\nFILTER (!isLiteral(?x) OR lang(?x) = '' OR langMatches(lang(?x), 'en'))\nns:m.0261m ns:location.location.contains ?x .\n?x ns:common.topic.notable_types ns:m.01mp .\n?x ns:location.country.currency_used ns:m.02l6h . \n}", 
        "compositionality_type": "conjunction", 
        "answers": [
            {
                "answer": "Collectivity of Saint Martin", 
                "answer_id": "m.02phy_9", 
                "aliases": [
                    "St. Martin"
                ]
            }, 
            {
                "answer": "Caribbean special municipalities of the Netherlands", 
                "answer_id": "m.0bwhs8r", 
                "aliases": [
                    "BES islands"
                ]
            }
        ], 
        "created": "2018-02-12T22:53:34"
    }, 
    {
        "ID": "WebQTrn-2784_08a3071aec88af141fc20ed22cfff0e2", 
        "webqsp_ID": "WebQTrn-2784", 
        "webqsp_question": "what movies does tupac act in", 
        "machine_question": "what movies does the person who once lived in Marin City act in", 
        "question": "What movies did the famous person who lived in Marin City starred in?", 
        "sparql": "PREFIX ns: <http://rdf.freebase.com/ns/>\nSELECT DISTINCT ?x\nWHERE {\nFILTER (?x != ?c)\nFILTER (!isLiteral(?x) OR lang(?x) = '' OR langMatches(lang(?x), 'en'))\n?c ns:people.person.places_lived ?k .\n?k ns:people.place_lived.location ns:m.053myr . \n?c ns:film.actor.film ?y .\n?y ns:film.performance.film ?x .\n}\n", 
        "compositionality_type": "composition", 
        "answers": [
            {
                "answer": "Murder Was the Case", 
                "answer_id": "m.02pkz7", 
                "aliases": [
                    "Snoop Doggy Dogg: Murder Was the Case"
                ]
            }, 
            {
                "answer": "Poetic Justice", 
                "answer_id": "m.06974q", 
                "aliases": [
                    "Poetic justice - Skjebnens ironi"
                ]
            }, 
            {
                "answer": "Gridlock'd", 
                "answer_id": "m.08dk0b", 
                "aliases": []
            }, 
            {
                "answer": "Above the Rim", 
                "answer_id": "m.08dk10", 
                "aliases": [
                    "Play Off"
                ]
            }, 
            {
                "answer": "Juice", 
                "answer_id": "m.08w51z", 
                "aliases": [
                    "Juice - City-War", 
                    "Watch Juice", 
                    "Angel Town 2"
                ]
            }, 
            {
                "answer": "Nothing but Trouble", 
                "answer_id": "m.0c6vx0", 
                "aliases": []
            }, 
            {
                "answer": "Gang Related", 
                "answer_id": "m.0cc2r_", 
                "aliases": []
            }, 
            {
                "answer": "Bullet", 
                "answer_id": "m.0f4nt1", 
                "aliases": []
            }
        ], 
        "created": "2018-02-13T00:40:43"
    }, 
    {
        "ID": "WebQTrn-209_97114c52c2bf3a660f08f6938e38ce27", 
        "webqsp_ID": "WebQTrn-209", 
        "webqsp_question": "when did kings last win stanley cup", 
        "machine_question": "when did the team won the 2012 Stanley Cup Finals championship last win stanley cup", 
        "question": "When did the team who won the 2012 Stanley Cup Finals championship game most recently win the Stanley Cup?", 
        "sparql": "PREFIX ns: <http://rdf.freebase.com/ns/>\nSELECT DISTINCT ?x\nWHERE {\nFILTER (?x != ?c)\nFILTER (!isLiteral(?x) OR lang(?x) = '' OR langMatches(lang(?x), 'en'))\n?c ns:sports.sports_team.championships ns:m.0jt52pz . \n?c ns:sports.sports_team.championships ?x .\n?x ns:time.event.end_date ?sk0 .\n}\nORDER BY DESC(xsd:datetime(?sk0))\nLIMIT 1\n", 
        "compositionality_type": "composition", 
        "answers": [
            {
                "answer": "2014 Stanley Cup Finals", 
                "answer_id": "m.010fdzhp", 
                "aliases": []
            }
        ], 
        "created": "2018-02-12T20:00:25"
    }, 
    {
        "ID": "WebQTrn-1185_22690ad5ad70b56c7dc11ec59b093c0e", 
        "webqsp_ID": "WebQTrn-1185", 
        "webqsp_question": "who did david villa play for", 
        "machine_question": "who did david villa play for and is the team won the 1957 Peque\u00c3\u00b1a Copa del Mundo de Clubes championship", 
        "question": "What team that won the 1957 Peque\u00c3\u00b1a Copa del Mundo de Clubes championship did David Villa play for?", 
        "sparql": "PREFIX ns: <http://rdf.freebase.com/ns/>\nSELECT DISTINCT ?x\nWHERE {\nFILTER (?x != ns:m.08zpzz)\nFILTER (!isLiteral(?x) OR lang(?x) = '' OR langMatches(lang(?x), 'en'))\nns:m.08zpzz ns:sports.pro_athlete.teams ?y .\n?y ns:sports.sports_team_roster.team ?x .\n?x ns:sports.sports_team.championships ns:m.011q3p00 . \n}", 
        "compositionality_type": "conjunction", 
        "answers": [
            {
                "answer": "FC Barcelona", 
                "answer_id": "m.0hvgt", 
                "aliases": [
                    "Futbol Club Barcelona", 
                    "FCB", 
                    "Blaugrana", 
                    "Barcelona", 
                    "Bar\u00e7a"
                ]
            }
        ], 
        "created": "2018-02-12T21:51:30"
    }, 
    {
        "ID": "WebQTest-1419_2eb1a76f1034bf0d86a58381859e299e", 
        "webqsp_ID": "WebQTest-1419", 
        "webqsp_question": "what inspired michelangelo buonarroti", 
        "machine_question": "what inspired the person who once lived in Caprese Michelangelo", 
        "question": "The person who once lived in Caprese Michelangelo was inspired by whom?", 
        "sparql": "PREFIX ns: <http://rdf.freebase.com/ns/>\nSELECT DISTINCT ?x\nWHERE {\nFILTER (?x != ?c)\nFILTER (!isLiteral(?x) OR lang(?x) = '' OR langMatches(lang(?x), 'en'))\n?c ns:people.person.places_lived ?k .\n?k ns:people.place_lived.location ns:m.05gp9y . \n?c ns:influence.influence_node.influenced_by ?x .\n}\n", 
        "compositionality_type": "composition", 
        "answers": [
            {
                "answer": "Giovanni Pico della Mirandola", 
                "answer_id": "m.013w_3", 
                "aliases": [
                    "Pico Mirandola", 
                    "Giovanni Pico Della Mirandola"
                ]
            }, 
            {
                "answer": "Domenico Ghirlandaio", 
                "answer_id": "m.01cc3w", 
                "aliases": [
                    "Domenico di Tommaso di Currado di Doffo Bigordi", 
                    "Il Ghirlandaio"
                ]
            }, 
            {
                "answer": "Lorenzo de' Medici", 
                "answer_id": "m.04qj5", 
                "aliases": [
                    "Lorenzo il Magnifico", 
                    "Giovanni de' Medici"
                ]
            }, 
            {
                "answer": "Melozzo da Forl\u00ec", 
                "answer_id": "m.072cpw", 
                "aliases": [
                    "Melozzo da Forli"
                ]
            }, 
            {
                "answer": "Girolamo Savonarola", 
                "answer_id": "m.0d8wb", 
                "aliases": []
            }, 
            {
                "answer": "Donatello", 
                "answer_id": "m.0j56d", 
                "aliases": [
                    "Donato di Niccolo Bardi"
                ]
            }
        ], 
        "created": "2018-02-13T05:19:39"
    }, 
    {
        "ID": "WebQTrn-1519_e6ab11a311f7146122495c678c785efe", 
        "webqsp_ID": "WebQTrn-1519", 
        "webqsp_question": "who is the falcons quarterback 2012", 
        "machine_question": "who is the falcons quarterback 2012 and is the pro athelete who started hist career on after 2001", 
        "question": "What pro athlete started his career after 2001 and was the 2012 Falcons quarterback?", 
        "sparql": "PREFIX ns: <http://rdf.freebase.com/ns/>\nSELECT DISTINCT ?x\nWHERE {\nFILTER (?x != ns:m.0wsr)\nFILTER (!isLiteral(?x) OR lang(?x) = '' OR langMatches(lang(?x), 'en'))\nns:m.0wsr ns:sports.sports_team.roster ?y .\n?y ns:sports.sports_team_roster.player ?x .\n?y ns:sports.sports_team_roster.position ns:m.06b1q .\nFILTER(NOT EXISTS {?y ns:sports.sports_team_roster.from ?sk0} || \nEXISTS {?y ns:sports.sports_team_roster.from ?sk1 . \nFILTER(xsd:datetime(?sk1) <= \"2012-12-31\"^^xsd:dateTime) })\nFILTER(NOT EXISTS {?y ns:sports.sports_team_roster.to ?sk2} || \nEXISTS {?y ns:sports.sports_team_roster.to ?sk3 . \nFILTER(xsd:datetime(?sk3) >= \"2012-01-01\"^^xsd:dateTime) })\n?x ns:sports.pro_athlete.career_start ?num .\nFILTER (?num > \"2001\"^^xsd:dateTime) . \n}", 
        "compositionality_type": "comparative", 
        "answers": [
            {
                "answer": "Luke McCown", 
                "answer_id": "m.05rsxm", 
                "aliases": [
                    "Chris James Redman"
                ]
            }, 
            {
                "answer": "Chris Redman", 
                "answer_id": "m.05vls2", 
                "aliases": [
                    "Lucas Patrick McCown"
                ]
            }
        ], 
        "created": "2018-02-12T22:27:54"
    }, 
    {
        "ID": "WebQTrn-1172_b9375d4eede0c4c219f39fe8f7210eb3", 
        "webqsp_ID": "WebQTrn-1172", 
        "webqsp_question": "where is university of alabama located", 
        "machine_question": "where is the education institution has a grad student named Roy Rogers located", 
        "question": "Where is the college Roy Rogers attended located?", 
        "sparql": "PREFIX ns: <http://rdf.freebase.com/ns/>\nSELECT DISTINCT ?x\nWHERE {\nFILTER (?x != ?c)\nFILTER (!isLiteral(?x) OR lang(?x) = '' OR langMatches(lang(?x), 'en'))\n?c ns:education.educational_institution.students_graduates ?k .\n?k ns:education.education.student ns:m.0f1db4 . \n?c ns:location.location.containedby ?x .\n}\n", 
        "compositionality_type": "composition", 
        "answers": [
            {
                "answer": "United States of America", 
                "answer_id": "m.09c7w0", 
                "aliases": [
                    "U.S. of A.", 
                    "Estats Units d'Am\u00e8rica", 
                    "USA", 
                    "U.S.A.", 
                    "U.S.", 
                    "The States", 
                    "US", 
                    "United States", 
                    "America"
                ]
            }, 
            {
                "answer": "Alabama", 
                "answer_id": "m.0gyh", 
                "aliases": [
                    "Cotton State", 
                    "AL", 
                    "Ala"
                ]
            }, 
            {
                "answer": "Tuscaloosa", 
                "answer_id": "m.0qc7l", 
                "aliases": [
                    "Tuscaloosa, Alabama", 
                    "Tuscaloosa County / Tuscaloosa city"
                ]
            }
        ], 
        "created": "2018-02-12T21:50:22"
    }, 
    {
        "ID": "WebQTrn-2408_893ee8a9291f424d1ede8b29731dd784", 
        "webqsp_ID": "WebQTrn-2408", 
        "webqsp_question": "which jane austen books are movies", 
        "machine_question": "which jane austen books are movies and is the film has a charcter named Beavis", 
        "question": "Which of Jane Austen Books has a character named Beavis and is also a movie?", 
        "sparql": "#MANUAL SPARQL\nPREFIX ns: <http://rdf.freebase.com/ns/>\nSELECT DISTINCT ?x\nWHERE {\n\t?x ns:common.topic.notable_types ns:m.0jsg2m .\n        ?x ns:film.film.story_by ns:m.040dv .?x ns:film.film.starring ?c .\n?c ns:film.performance.character ns:m.0273yz6 . \n}", 
        "compositionality_type": "conjunction", 
        "answers": [
            {
                "answer": "Clueless", 
                "answer_id": "m.0qjzd", 
                "aliases": [
                    "Clueless (Fuera de onda)", 
                    "Nimas pojma", 
                    "Spin\u00e9dzserek", 
                    "No Worries", 
                    "As Meninas de Beverly Hills", 
                    "To koritsi tou Beverly Hills", 
                    "Ni idea", 
                    "Clueless - Was sonst!", 
                    "Firlama kizlar", 
                    "Djevojke s Beverly Hillsa", 
                    "Ragazze a Beverly Hills", 
                    "I Was a Teenage Teenager", 
                    "Les coll\u00e9giennes de Beverly Hills", 
                    "As Patricinhas de Beverly Hills"
                ]
            }
        ], 
        "created": "2018-02-12T23:53:09"
    }, 
    {
        "ID": "WebQTest-1325_02714e184571525b8c510d20f11fc886", 
        "webqsp_ID": "WebQTest-1325", 
        "webqsp_question": "what language do maltese speak", 
        "machine_question": "what language do the country that has the national anthem L-Innu Malti speak", 
        "question": "L-Innu Malti is the national anthem in the country that speaks which language?", 
        "sparql": "PREFIX ns: <http://rdf.freebase.com/ns/>\nSELECT DISTINCT ?x\nWHERE {\nFILTER (?x != ?c)\nFILTER (!isLiteral(?x) OR lang(?x) = '' OR langMatches(lang(?x), 'en'))\n?c ns:location.country.national_anthem ?k .\n?k ns:government.national_anthem_of_a_country.anthem ns:m.017wj_ . \n?c ns:location.country.languages_spoken ?x .\n}\n", 
        "compositionality_type": "composition", 
        "answers": [
            {
                "answer": "English Language", 
                "answer_id": "m.02h40lc", 
                "aliases": [
                    "Sekgoa", 
                    "Anglit", 
                    "English language", 
                    "English"
                ]
            }
        ], 
        "created": "2018-02-13T05:06:03"
    }, 
    {
        "ID": "WebQTest-1922_6da066f86a745e1c82688b54142f4680", 
        "webqsp_ID": "WebQTest-1922", 
        "webqsp_question": "what offices did theodore roosevelt hold", 
        "machine_question": "what offices did theodore roosevelt hold and is the office position was held from 1930", 
        "question": "What office did Theodore Rossevelt held since 1930?", 
        "sparql": "PREFIX ns: <http://rdf.freebase.com/ns/>\nSELECT DISTINCT ?x\nWHERE {\nFILTER (?x != ns:m.07hyk)\nFILTER (!isLiteral(?x) OR lang(?x) = '' OR langMatches(lang(?x), 'en'))\nns:m.07hyk ns:government.politician.government_positions_held ?y .\n?y ns:government.government_position_held.basic_title ?x .\n?x ns:government.government_office_or_title.office_holders ?c .\n?c ns:government.government_position_held.from \"1930\"^^xsd:dateTime . \n}", 
        "compositionality_type": "conjunction", 
        "answers": [
            {
                "answer": "Member of the Legislative Assembly", 
                "answer_id": "m.0621v9", 
                "aliases": [
                    "Minister of Legislative Assembly"
                ]
            }
        ], 
        "created": "2018-02-13T06:18:56"
    }, 
    {
        "ID": "WebQTrn-3140_213cbfafc2612b42c5f8efe85c3532c5", 
        "webqsp_ID": "WebQTrn-3140", 
        "webqsp_question": "what kind of political system does iran have", 
        "machine_question": "what kind of political system does the currency used in the country is Iranian rial have", 
        "question": "What is the political system where the Iranian Rial is used?", 
        "sparql": "PREFIX ns: <http://rdf.freebase.com/ns/>\nSELECT DISTINCT ?x\nWHERE {\nFILTER (?x != ?c)\nFILTER (!isLiteral(?x) OR lang(?x) = '' OR langMatches(lang(?x), 'en'))\n?c ns:location.country.currency_used ns:m.034n11 . \n?c ns:location.country.form_of_government ?x .\n}\n", 
        "compositionality_type": "composition", 
        "answers": [
            {
                "answer": "Parliamentary system", 
                "answer_id": "m.018wl5", 
                "aliases": [
                    "Parliamentary", 
                    "Parliamentary Democracy"
                ]
            }, 
            {
                "answer": "Presidential system", 
                "answer_id": "m.01d9r3", 
                "aliases": [
                    "Presidential"
                ]
            }, 
            {
                "answer": "Islamic republic", 
                "answer_id": "m.01fgl7", 
                "aliases": [
                    "Islamic"
                ]
            }, 
            {
                "answer": "Unitary state", 
                "answer_id": "m.01fpfn", 
                "aliases": [
                    "Unitary republic", 
                    "Unitary"
                ]
            }, 
            {
                "answer": "Theocracy", 
                "answer_id": "m.07lg6", 
                "aliases": []
            }
        ], 
        "created": "2018-02-13T01:18:48"
    }, 
    {
        "ID": "WebQTrn-951_c4a4d1b444e9f0b28e960a3c1f7717ac", 
        "webqsp_ID": "WebQTrn-951", 
        "webqsp_question": "what is the currency name of china", 
        "machine_question": "what is the currency name of the location that appointed National People's Congress to govermental position", 
        "question": "The location that appointed National People's Congress to governmental position has what currency?", 
        "sparql": "PREFIX ns: <http://rdf.freebase.com/ns/>\nSELECT DISTINCT ?x\nWHERE {\nFILTER (?x != ?c)\nFILTER (!isLiteral(?x) OR lang(?x) = '' OR langMatches(lang(?x), 'en'))\n?c ns:government.governmental_jurisdiction.governing_officials ?k .\n?k ns:government.government_position_held.appointed_by ns:m.0c3xm . \n?c ns:location.country.currency_used ?x .\n}\n", 
        "compositionality_type": "composition", 
        "answers": [
            {
                "answer": "Renminbi", 
                "answer_id": "m.0hn4_", 
                "aliases": []
            }
        ], 
        "created": "2018-02-12T21:25:49"
    }, 
    {
        "ID": "WebQTrn-1299_993bf41507919333b3a87058c5072363", 
        "webqsp_ID": "WebQTrn-1299", 
        "webqsp_question": "when was the last superbowl win for the steelers", 
        "machine_question": "when was the last superbowl win for the the sports team with the fight song Renegade", 
        "question": "When was the last time the team that have the fight song Renegade win the Superbowl last?", 
        "sparql": "PREFIX ns: <http://rdf.freebase.com/ns/>\nSELECT DISTINCT ?x\nWHERE {\nFILTER (?x != ?c)\nFILTER (!isLiteral(?x) OR lang(?x) = '' OR langMatches(lang(?x), 'en'))\n?c ns:sports.sports_team.fight_song ns:m.06c78r . \n?c ns:sports.sports_team.championships ?x .\n?x ns:common.topic.notable_types ns:m.01xljv1 .\n?x ns:time.event.end_date ?sk0 .\n}\nORDER BY DESC(xsd:datetime(?sk0))\nLIMIT 1\n", 
        "compositionality_type": "composition", 
        "answers": [
            {
                "answer": "Super Bowl XLIII", 
                "answer_id": "m.04n7r5", 
                "aliases": [
                    "Super Bowl 43", 
                    "Super Bowl 2009"
                ]
            }
        ], 
        "created": "2018-02-12T22:02:37"
    }, 
    {
        "ID": "WebQTrn-2296_091f5e9877e6b30cdab0d00aceb3eb81", 
        "webqsp_ID": "WebQTrn-2296", 
        "webqsp_question": "what is the name of the bengals quarterback", 
        "machine_question": "what is the name of the the team has a team moscot named Who Dey quarterback", 
        "question": "Who were the quarterbacks of the team with mascot named Who Dey?", 
        "sparql": "PREFIX ns: <http://rdf.freebase.com/ns/>\nSELECT DISTINCT ?x\nWHERE {\nFILTER (?x != ?c)\nFILTER (!isLiteral(?x) OR lang(?x) = '' OR langMatches(lang(?x), 'en'))\n?c ns:sports.sports_team.team_mascot ns:m.052tmz0 . \n?c ns:sports.sports_team.roster ?y .\n?y ns:sports.sports_team_roster.player ?x .\n?y ns:sports.sports_team_roster.position ns:m.06b1q .\nFILTER(NOT EXISTS {?y ns:sports.sports_team_roster.from ?sk0} || \nEXISTS {?y ns:sports.sports_team_roster.from ?sk1 . \nFILTER(xsd:datetime(?sk1) <= \"2015-08-10\"^^xsd:dateTime) })\nFILTER(NOT EXISTS {?y ns:sports.sports_team_roster.to ?sk2} || \nEXISTS {?y ns:sports.sports_team_roster.to ?sk3 . \nFILTER(xsd:datetime(?sk3) >= \"2015-08-10\"^^xsd:dateTime) })\n}\n", 
        "compositionality_type": "composition", 
        "answers": [
            {
                "answer": "Andy Dalton", 
                "answer_id": "m.02x7_7p", 
                "aliases": [
                    "Andrew Gregory Dalton", 
                    "The Red Rifle"
                ]
            }, 
            {
                "answer": "Jason Campbell", 
                "answer_id": "m.05w0_k", 
                "aliases": []
            }, 
            {
                "answer": "AJ McCarron", 
                "answer_id": "m.0h62tzz", 
                "aliases": [
                    "Raymond Anthony \"AJ\" McCarron, Jr."
                ]
            }
        ], 
        "created": "2018-02-12T23:43:48"
    }, 
    {
        "ID": "WebQTest-1135_184fe6d0c0b6a0fad7b98af2c8fc8f9a", 
        "webqsp_ID": "WebQTest-1135", 
        "webqsp_question": "who was vp for nixon", 
        "machine_question": "who was vp for nixon and held his govermental position from 1965", 
        "question": "Who was the VP for Nixon, which held his governmental position from the year of 1965?", 
        "sparql": "PREFIX ns: <http://rdf.freebase.com/ns/>\nSELECT DISTINCT ?x\nWHERE {\nFILTER (?x != ns:m.06c97)\nFILTER (!isLiteral(?x) OR lang(?x) = '' OR langMatches(lang(?x), 'en'))\nns:m.06c97 ns:government.us_president.vice_president ?x .\n?x ns:government.politician.government_positions_held ?c .\n?c ns:government.government_position_held.from \"1965\"^^xsd:dateTime . \n}", 
        "compositionality_type": "conjunction", 
        "answers": [
            {
                "answer": "Gerald Ford", 
                "answer_id": "m.0c_md_", 
                "aliases": [
                    "President Gerald R. Ford", 
                    "Congressman Gerald Ford", 
                    "Gerald Rudolph Ford", 
                    "Gerald R. Ford", 
                    "Leslie Lynch King Jr.", 
                    "Jerry", 
                    "Gerald Rudolph \"Jerry\" Ford, Jr.", 
                    "Leslie Lynch King, Jr.", 
                    "President Gerald Ford"
                ]
            }
        ], 
        "created": "2018-02-13T04:47:03"
    }, 
    {
        "ID": "WebQTrn-2591_471b83eade9707a4dba68e201bf29d73", 
        "webqsp_ID": "WebQTrn-2591", 
        "webqsp_question": "who are china 's trading partners", 
        "machine_question": "who are china 's trading partners and the location time zone is Greenwich Mean Time Zone", 
        "question": "Which nation is a partner in trade with China and is situated in the Greenwich Mean Time Zone?", 
        "sparql": "#MANUAL SPARQL\nPREFIX ns: <http://rdf.freebase.com/ns/>\nSELECT DISTINCT ?x \nWHERE {\n\tFILTER (?x != ns:m.0d05w3)\n\t{ \n\t  ns:m.0d05w3 ns:location.statistical_region.places_exported_to ?y .\n\t  ?y ns:location.imports_and_exports.exported_to ?x . \n\t}\n\tUNION\n\t{\n\t  ns:m.0d05w3 ns:location.statistical_region.places_imported_from ?y .\n\t  ?y ns:location.imports_and_exports.imported_from ?x . \n\t}?x ns:location.location.time_zones ns:m.03bdv . \n}", 
        "compositionality_type": "conjunction", 
        "answers": [
            {
                "answer": "Sierra Leone", 
                "answer_id": "m.06s_2", 
                "aliases": []
            }
        ], 
        "created": "2018-02-13T00:17:15"
    }, 
    {
        "ID": "WebQTrn-498_f5779141967bbbc15b40ea3d5df71e93", 
        "webqsp_ID": "WebQTrn-498", 
        "webqsp_question": "what are the most common religions in the united states", 
        "machine_question": "what are the most common religions in the united states and the religion organiztion is Army of the Lord", 
        "question": "Of all the most common religions in the United States, which has a religion organization called the Army of the Lord?", 
        "sparql": "PREFIX ns: <http://rdf.freebase.com/ns/>\nSELECT DISTINCT ?x\nWHERE {\nFILTER (?x != ns:m.09c7w0)\nFILTER (!isLiteral(?x) OR lang(?x) = '' OR langMatches(lang(?x), 'en'))\nns:m.09c7w0 ns:location.statistical_region.religions ?y .\n?y ns:location.religion_percentage.religion ?x .\n?x ns:religion.religion.organizations ns:m.010hq7jr . \n}", 
        "compositionality_type": "conjunction", 
        "answers": [
            {
                "answer": "Christianity", 
                "answer_id": "m.01lp8", 
                "aliases": [
                    "Christian"
                ]
            }
        ], 
        "created": "2018-02-12T20:37:33"
    }, 
    {
        "ID": "WebQTest-167_451b633073a38df0bc443d36d83e70e3", 
        "webqsp_ID": "WebQTest-167", 
        "webqsp_question": "where did queensland get its name from", 
        "machine_question": "where did the location that appointed Henry Wylie Norman to govermental position get its name from", 
        "question": "Who named the location that appointed Henry Wylie Norman to a governmental position?", 
        "sparql": "PREFIX ns: <http://rdf.freebase.com/ns/>\nSELECT DISTINCT ?x\nWHERE {\nFILTER (?x != ?c)\nFILTER (!isLiteral(?x) OR lang(?x) = '' OR langMatches(lang(?x), 'en'))\n?c ns:government.governmental_jurisdiction.governing_officials ?k .\n?k ns:government.government_position_held.appointed_by ns:m.06v4bt . \n?c ns:symbols.namesake.named_after ?x .\n}\n", 
        "compositionality_type": "composition", 
        "answers": [
            {
                "answer": "Queen Victoria", 
                "answer_id": "m.0cw10", 
                "aliases": [
                    "Her Majesty The Queen", 
                    "Her Royal Highness Princess Alexandrina Victoria of Kent", 
                    "H.M. Queen Victoria", 
                    "Her Imperial Majesty The Queen-Empress", 
                    "Her Majesty Victoria, by the Grace of God, of the United Kingdom of Great Britain and Ireland Queen, Defender of the Faith, Empress of India", 
                    "Princess Alexandrina Victoria", 
                    "Alexandrina Victoria", 
                    "Victoria", 
                    "Queen Victoria of the United Kingdom"
                ]
            }
        ], 
        "created": "2018-02-13T02:52:43"
    }, 
    {
        "ID": "WebQTrn-2484_382c85336af6c674dfcbf8c9eba83f58", 
        "webqsp_ID": "WebQTrn-2484", 
        "webqsp_question": "what all does stan kroenke own", 
        "machine_question": "what all does stan kroenke own and is the team has a team moscot named Rocky", 
        "question": "What basketball team owned by Stan Kroenke has a mascot that goes by the name Rocky?", 
        "sparql": "PREFIX ns: <http://rdf.freebase.com/ns/>\nSELECT DISTINCT ?x\nWHERE {\nFILTER (?x != ns:m.0dg6f6)\nFILTER (!isLiteral(?x) OR lang(?x) = '' OR langMatches(lang(?x), 'en'))\nns:m.0dg6f6 ns:sports.sports_team_owner.teams_owned ?x .\n?x ns:sports.sports_team.team_mascot ns:m.05p3mdz . \n}", 
        "compositionality_type": "conjunction", 
        "answers": [
            {
                "answer": "Denver Nuggets", 
                "answer_id": "m.0jmdb", 
                "aliases": [
                    "Denver Larks", 
                    "Denver Rockets", 
                    "Nuggets"
                ]
            }
        ], 
        "created": "2018-02-13T00:01:14"
    }, 
    {
        "ID": "WebQTrn-1299_365a098580db25b4bb178c4ed81bd460", 
        "webqsp_ID": "WebQTrn-1299", 
        "webqsp_question": "when was the last superbowl win for the steelers", 
        "machine_question": "when was the last superbowl win for the the team won the 2009 AFC Championship Game championship", 
        "question": "What was the last superbowl won by the 2009 AFC champions?", 
        "sparql": "PREFIX ns: <http://rdf.freebase.com/ns/>\nSELECT DISTINCT ?x\nWHERE {\nFILTER (?x != ?c)\nFILTER (!isLiteral(?x) OR lang(?x) = '' OR langMatches(lang(?x), 'en'))\n?c ns:sports.sports_team.championships ns:m.0_gt_lv . \n?c ns:sports.sports_team.championships ?x .\n?x ns:common.topic.notable_types ns:m.01xljv1 .\n?x ns:time.event.end_date ?sk0 .\n}\nORDER BY DESC(xsd:datetime(?sk0))\nLIMIT 1\n", 
        "compositionality_type": "composition", 
        "answers": [
            {
                "answer": "Super Bowl XLIII", 
                "answer_id": "m.04n7r5", 
                "aliases": [
                    "Super Bowl 43", 
                    "Super Bowl 2009"
                ]
            }
        ], 
        "created": "2018-02-12T22:02:37"
    }, 
    {
        "ID": "WebQTrn-2514_e078296017ae8a118dd39e3156352a14", 
        "webqsp_ID": "WebQTrn-2514", 
        "webqsp_question": "what time is kansas in", 
        "machine_question": "what time is the us state that has a capital named Topeka in", 
        "question": "If you are in the State that has a capital of Topeka, what time zone are you in?", 
        "sparql": "PREFIX ns: <http://rdf.freebase.com/ns/>\nSELECT DISTINCT ?x\nWHERE {\nFILTER (?x != ?c)\nFILTER (!isLiteral(?x) OR lang(?x) = '' OR langMatches(lang(?x), 'en'))\n?c ns:location.us_state.capital ns:m.0ftyc . \n?c ns:location.location.time_zones ?x .\n}\n", 
        "compositionality_type": "composition", 
        "answers": [
            {
                "answer": "Central Time Zone", 
                "answer_id": "m.02fqwt", 
                "aliases": [
                    "Central Standard Time", 
                    "Central Time", 
                    "Central Daylight Time", 
                    "Central Standard Time Zone"
                ]
            }, 
            {
                "answer": "Mountain Time Zone", 
                "answer_id": "m.02hczc", 
                "aliases": [
                    "Mountain Standard Time Zone", 
                    "Mountain Time"
                ]
            }
        ], 
        "created": "2018-02-13T00:04:52"
    }, 
    {
        "ID": "WebQTrn-494_f20d37026a54a0ce5789e0e93e43c619", 
        "webqsp_ID": "WebQTrn-494", 
        "webqsp_question": "what religions are in russia", 
        "machine_question": "what religions are in russia and the religion place of worship is B\u00c3\u00bcy\u00c3\u00bck Selimiye Mosque", 
        "question": "What religion in Russia worships at the Buyuk Selimiye Mosque?", 
        "sparql": "PREFIX ns: <http://rdf.freebase.com/ns/>\nSELECT DISTINCT ?x\nWHERE {\nFILTER (?x != ns:m.06bnz)\nFILTER (!isLiteral(?x) OR lang(?x) = '' OR langMatches(lang(?x), 'en'))\nns:m.06bnz ns:location.statistical_region.religions ?y .\n?y ns:location.religion_percentage.religion ?x .\n?x ns:religion.religion.places_of_worship ns:m.010282jt . \n}", 
        "compositionality_type": "conjunction", 
        "answers": [
            {
                "answer": "Islam", 
                "answer_id": "m.0flw86", 
                "aliases": []
            }
        ], 
        "created": "2018-02-12T20:36:17"
    }, 
    {
        "ID": "WebQTrn-1341_a7e9c06267e287818efb1c2c3a6720fd", 
        "webqsp_ID": "WebQTrn-1341", 
        "webqsp_question": "what is the boston celtics current roster", 
        "machine_question": "what is the boston celtics current roster and is the pro athelete who started hist career on latest", 
        "question": "Of the Boston Celtics current roster, which is the pro athlete who started his career the latest?", 
        "sparql": "PREFIX ns: <http://rdf.freebase.com/ns/>\nSELECT DISTINCT ?x\nWHERE {\nFILTER (?x != ns:m.0bwjj)\nFILTER (!isLiteral(?x) OR lang(?x) = '' OR langMatches(lang(?x), 'en'))\nns:m.0bwjj ns:sports.sports_team.roster ?y .\n?y ns:sports.sports_team_roster.player ?x .\nFILTER(NOT EXISTS {?y ns:sports.sports_team_roster.from ?sk0} || \nEXISTS {?y ns:sports.sports_team_roster.from ?sk1 . \nFILTER(xsd:datetime(?sk1) <= \"2015-08-10\"^^xsd:dateTime) })\nFILTER(NOT EXISTS {?y ns:sports.sports_team_roster.to ?sk2} || \nEXISTS {?y ns:sports.sports_team_roster.to ?sk3 . \nFILTER(xsd:datetime(?sk3) >= \"2015-08-10\"^^xsd:dateTime) })\n?x ns:sports.pro_athlete.career_start ?num .\n}\nORDER BY DESC(?num) LIMIT 1", 
        "compositionality_type": "superlative", 
        "answers": [
            {
                "answer": "Dwight Powell", 
                "answer_id": "m.0w6vh_2", 
                "aliases": []
            }
        ], 
        "created": "2018-02-12T22:07:31"
    }, 
    {
        "ID": "WebQTest-1108_1988e0b7c1ed7316160b416a7c83b44d", 
        "webqsp_ID": "WebQTest-1108", 
        "webqsp_question": "what radio station is npr on in nyc", 
        "machine_question": "what radio station is the organiztion leadership has a person named Jarl Mohn on in nyc", 
        "question": "Jarl Mohn is a leader in the organization with what radio station in NYC?", 
        "sparql": "PREFIX ns: <http://rdf.freebase.com/ns/>\nSELECT DISTINCT ?x\nWHERE {\nFILTER (?x != ?c)\nFILTER (!isLiteral(?x) OR lang(?x) = '' OR langMatches(lang(?x), 'en'))\n?c ns:organization.organization.leadership ?k .\n?k ns:organization.leadership.person ns:m.012zdryp . \n?c ns:broadcast.radio_network.affiliates ?y .\n?y ns:broadcast.radio_affiliation_duration.station ?x .\n?x ns:broadcast.broadcast.area_served ns:m.02_286 .\n}\n", 
        "compositionality_type": "composition", 
        "answers": [
            {
                "answer": "WNYC", 
                "answer_id": "m.01_3by", 
                "aliases": []
            }
        ], 
        "created": "2018-02-13T04:42:43"
    }, 
    {
        "ID": "WebQTest-349_14ca2335909cb298b26e67fb7ec93d60", 
        "webqsp_ID": "WebQTest-349", 
        "webqsp_question": "who did carlos boozer play for", 
        "machine_question": "who did carlos boozer play for and the sports team owner is Usher", 
        "question": "Which team owned by Usher did Carlos Boozer play for?", 
        "sparql": "PREFIX ns: <http://rdf.freebase.com/ns/>\nSELECT DISTINCT ?x\nWHERE {\nFILTER (?x != ns:m.03l2cs)\nFILTER (!isLiteral(?x) OR lang(?x) = '' OR langMatches(lang(?x), 'en'))\nns:m.03l2cs ns:basketball.basketball_player.player_statistics ?y .\n?y ns:basketball.basketball_player_stats.team ?x .\n?x ns:sports.professional_sports_team.owner_s ns:m.01trhmt . \n}", 
        "compositionality_type": "conjunction", 
        "answers": [
            {
                "answer": "Cleveland Cavaliers", 
                "answer_id": "m.0jm7n", 
                "aliases": [
                    "Cavs", 
                    "Cavaliers"
                ]
            }
        ], 
        "created": "2018-02-13T03:21:36"
    }, 
    {
        "ID": "WebQTrn-2224_903862ba8e6858e19627acb4f736619f", 
        "webqsp_ID": "WebQTrn-2224", 
        "webqsp_question": "where is arabic used", 
        "machine_question": "where is arabic used and is the country that contains Emirate of Ajman", 
        "question": "What middle eastern country speaking Arabic uses the Emirate of Ajman as main trading currency?", 
        "sparql": "PREFIX ns: <http://rdf.freebase.com/ns/>\nSELECT DISTINCT ?x\nWHERE {\nFILTER (?x != ns:m.0jzc)\nFILTER (!isLiteral(?x) OR lang(?x) = '' OR langMatches(lang(?x), 'en'))\nns:m.0jzc ns:language.human_language.countries_spoken_in ?x .\n?x ns:location.country.administrative_divisions ns:m.01430j . \n}", 
        "compositionality_type": "conjunction", 
        "answers": [
            {
                "answer": "United Arab Emirates", 
                "answer_id": "m.0j1z8", 
                "aliases": [
                    "Emirates", 
                    "UAE"
                ]
            }
        ], 
        "created": "2018-02-12T23:36:30"
    }, 
    {
        "ID": "WebQTrn-1938_744a496b907e407b16bc5d7c197dc3f0", 
        "webqsp_ID": "WebQTrn-1938", 
        "webqsp_question": "what type of government does israel", 
        "machine_question": "what type of government does the religious leader is Ovadia Yosef", 
        "question": "What form of goverment is used by the country who has Ovadia Yosef as a religious leader?", 
        "sparql": "PREFIX ns: <http://rdf.freebase.com/ns/>\nSELECT DISTINCT ?x\nWHERE {\nFILTER (?x != ?c)\nFILTER (!isLiteral(?x) OR lang(?x) = '' OR langMatches(lang(?x), 'en'))\n?c ns:religion.religious_leadership_jurisdiction.leader ?k .\n?k ns:religion.religious_organization_leadership.leader ns:m.02qmnw . \n?c ns:location.country.form_of_government ?x .\n}\n", 
        "compositionality_type": "composition", 
        "answers": [
            {
                "answer": "Parliamentary system", 
                "answer_id": "m.018wl5", 
                "aliases": [
                    "Parliamentary", 
                    "Parliamentary Democracy"
                ]
            }
        ], 
        "created": "2018-02-12T23:08:49"
    }, 
    {
        "ID": "WebQTrn-15_c1ae09f2bd381ec469cbeaf5dc0ad1f3", 
        "webqsp_ID": "WebQTrn-15", 
        "webqsp_question": "what is nina dobrev nationality", 
        "machine_question": "what is nina dobrev nationality and is the net migration number was less than -106602", 
        "question": "Which nationality is claimed by Nina Dobrev and has a net migration number that is below 106602?", 
        "sparql": "PREFIX ns: <http://rdf.freebase.com/ns/>\nSELECT DISTINCT ?x\nWHERE {\nFILTER (?x != ns:m.027nwk2)\nFILTER (!isLiteral(?x) OR lang(?x) = '' OR langMatches(lang(?x), 'en'))\nns:m.027nwk2 ns:people.person.nationality ?x .\n?x ns:location.statistical_region.net_migration ?c .\n?c ns:measurement_unit.dated_integer.number ?num .\nFILTER (xsd:integer(?num) < -106602) . \n}", 
        "compositionality_type": "comparative", 
        "answers": [
            {
                "answer": "Bulgaria", 
                "answer_id": "m.015qh", 
                "aliases": [
                    "Republic of Bulgaria"
                ]
            }
        ], 
        "created": "2018-02-12T19:39:38"
    }, 
    {
        "ID": "WebQTest-1074_8f0b737c79a9e256c32dab3c0e668390", 
        "webqsp_ID": "WebQTest-1074", 
        "webqsp_question": "who is lamar odom playing for this year", 
        "machine_question": "who is lamar odom playing for this year and the sports team owner is Jerry Buss", 
        "question": "What sports team owned by Jerry Buss did Lamar Odom play for?", 
        "sparql": "PREFIX ns: <http://rdf.freebase.com/ns/>\nSELECT DISTINCT ?x\nWHERE {\nFILTER (?x != ns:m.02_nkp)\nFILTER (!isLiteral(?x) OR lang(?x) = '' OR langMatches(lang(?x), 'en'))\nns:m.02_nkp ns:sports.pro_athlete.teams ?y .\n?y ns:sports.sports_team_roster.team ?x .\n?x ns:sports.professional_sports_team.owner_s ns:m.03_6fp . \n}", 
        "compositionality_type": "conjunction", 
        "answers": [
            {
                "answer": "Los Angeles Lakers", 
                "answer_id": "m.0jmk7", 
                "aliases": [
                    "Lakeshow", 
                    "LA Lakers", 
                    "Showtime", 
                    "Lakers", 
                    "The Lakers", 
                    "Minneapolis Lakers"
                ]
            }
        ], 
        "created": "2018-02-13T04:37:06"
    }, 
    {
        "ID": "WebQTrn-1232_ae9a833cf2cca30c1c9725fc6a167794", 
        "webqsp_ID": "WebQTrn-1232", 
        "webqsp_question": "where was the roman empire centered", 
        "machine_question": "where was the the country that contains Africa Proconsularis centered", 
        "question": "Where is the country that has Africa Proconsularis centered?", 
        "sparql": "PREFIX ns: <http://rdf.freebase.com/ns/>\nSELECT DISTINCT ?x\nWHERE {\nFILTER (?x != ?c)\nFILTER (!isLiteral(?x) OR lang(?x) = '' OR langMatches(lang(?x), 'en'))\n?c ns:location.country.administrative_divisions ns:m.02d53g . \n?c ns:location.country.capital ?x .\n}\n", 
        "compositionality_type": "composition", 
        "answers": [
            {
                "answer": "Constantinople", 
                "answer_id": "m.01q0l", 
                "aliases": [
                    "Constantinopolis", 
                    "Constantinople, Istanbul", 
                    "city of Constantine", 
                    "Konstantino\u00fapolis", 
                    "Konstantino\u00fapoli", 
                    "Kostantiniyye"
                ]
            }, 
            {
                "answer": "Rome", 
                "answer_id": "m.06c62", 
                "aliases": [
                    "the City of seven hills", 
                    "Roma", 
                    "Rome, Italy", 
                    "The eternal City", 
                    "\u0420\u0438\u043c", 
                    "Comune of Rome", 
                    "Caput Mundi"
                ]
            }, 
            {
                "answer": "Ravenna", 
                "answer_id": "m.09b93", 
                "aliases": []
            }
        ], 
        "created": "2018-02-12T21:56:41"
    }, 
    {
        "ID": "WebQTest-928_a1e95f5df7d3579ee2d869302998b043", 
        "webqsp_ID": "WebQTest-928", 
        "webqsp_question": "what colleges did harper lee attend", 
        "machine_question": "what colleges did the person education institution is Monroe County High School attend", 
        "question": "The person who attended education institution Monroe County High School attended what colleges?", 
        "sparql": "PREFIX ns: <http://rdf.freebase.com/ns/>\nSELECT DISTINCT ?x\nWHERE {\nFILTER (?x != ?c)\nFILTER (!isLiteral(?x) OR lang(?x) = '' OR langMatches(lang(?x), 'en'))\n?c ns:people.person.education ?k .\n?k ns:education.education.institution ns:m.0crdc8g . \n?c ns:people.person.education ?y .\n?y ns:education.education.institution ?x .\n?x ns:common.topic.notable_types ns:m.01y2hnl .\n}\n", 
        "compositionality_type": "composition", 
        "answers": [
            {
                "answer": "University of Alabama", 
                "answer_id": "m.01wdl3", 
                "aliases": [
                    "UA", 
                    "University of Alabama, Tuscaloosa", 
                    "University of Alabama, main campus"
                ]
            }, 
            {
                "answer": "Huntingdon College", 
                "answer_id": "m.069vxk", 
                "aliases": [
                    "Huntingdon College, Montgomery", 
                    "Huntingdon", 
                    "Huntingdon College, main campus"
                ]
            }, 
            {
                "answer": "University of Alabama School of Law", 
                "answer_id": "m.06fv_v", 
                "aliases": [
                    "University of Alabama School of Law, Tuscaloosa", 
                    "University of Alabama School of Law, main campus"
                ]
            }, 
            {
                "answer": "University of Oxford", 
                "answer_id": "m.07tgn", 
                "aliases": [
                    "Universitas Oxoniensis", 
                    "Oxford University"
                ]
            }
        ], 
        "created": "2018-02-13T04:25:37"
    }, 
    {
        "ID": "WebQTest-859_71f8695fd9d505f04a479ec4bf7a65c8", 
        "webqsp_ID": "WebQTest-859", 
        "webqsp_question": "what are the predominant religions in russia", 
        "machine_question": "what are the predominant religions in russia and the religion place of worship is Madayi Palli", 
        "question": "What predominant religion in Russia worships at Madayi Palli?", 
        "sparql": "PREFIX ns: <http://rdf.freebase.com/ns/>\nSELECT DISTINCT ?x\nWHERE {\nFILTER (?x != ns:m.06bnz)\nFILTER (!isLiteral(?x) OR lang(?x) = '' OR langMatches(lang(?x), 'en'))\nns:m.06bnz ns:location.statistical_region.religions ?y .\n?y ns:location.religion_percentage.religion ?x .\n?x ns:religion.religion.places_of_worship ns:m.0102cw_f . \n}", 
        "compositionality_type": "conjunction", 
        "answers": [
            {
                "answer": "Islam", 
                "answer_id": "m.0flw86", 
                "aliases": []
            }
        ], 
        "created": "2018-02-13T04:18:14"
    }, 
    {
        "ID": "WebQTrn-2496_085ced56c2b8a859253d1cd5749c9a28", 
        "webqsp_ID": "WebQTrn-2496", 
        "webqsp_question": "where is portuguese language spoken", 
        "machine_question": "where is portuguese language spoken and the currency used in the country is Central African CFA franc", 
        "question": "What Portuguese-speaking country uses the Central African CFA Franc?", 
        "sparql": "PREFIX ns: <http://rdf.freebase.com/ns/>\nSELECT DISTINCT ?x\nWHERE {\nFILTER (?x != ns:m.05zjd)\nFILTER (!isLiteral(?x) OR lang(?x) = '' OR langMatches(lang(?x), 'en'))\nns:m.05zjd ns:language.human_language.countries_spoken_in ?x .\n?x ns:location.country.currency_used ns:m.025sw2b . \n}", 
        "compositionality_type": "conjunction", 
        "answers": [
            {
                "answer": "Equatorial Guinea", 
                "answer_id": "m.02kcz", 
                "aliases": []
            }
        ], 
        "created": "2018-02-13T00:03:09"
    }, 
    {
        "ID": "WebQTrn-158_682800b1263c4a6d5b650e4196fc2b7d", 
        "webqsp_ID": "WebQTrn-158", 
        "webqsp_question": "what cities does ryanair fly to", 
        "machine_question": "what cities does ryanair fly to and the location time zone is Central European Time Zone", 
        "question": "What cities in the Central European Time Zone does Ryanair fly to?", 
        "sparql": "PREFIX ns: <http://rdf.freebase.com/ns/>\nSELECT DISTINCT ?x\nWHERE {\nFILTER (?x != ns:m.01m_zd)\nFILTER (!isLiteral(?x) OR lang(?x) = '' OR langMatches(lang(?x), 'en'))\nns:m.01m_zd ns:aviation.airline.airports_served ?y .\n?y ns:aviation.airline_airport_presence.cities_served ?x .\n?x ns:location.location.time_zones ns:m.02llzg . \n}", 
        "compositionality_type": "conjunction", 
        "answers": [
            {
                "answer": "Barcelona", 
                "answer_id": "m.01f62", 
                "aliases": [
                    "BCN", 
                    "Barcelone", 
                    "Barcellona", 
                    "Barcelona, Spain", 
                    "City of Counts", 
                    "Barna"
                ]
            }, 
            {
                "answer": "Bergamo", 
                "answer_id": "m.01jp4s", 
                "aliases": []
            }, 
            {
                "answer": "Oslo", 
                "answer_id": "m.05l64", 
                "aliases": [
                    "Oslo Fylke", 
                    "Oslo kommune", 
                    "Kristiania"
                ]
            }, 
            {
                "answer": "Stockholm", 
                "answer_id": "m.06mxs", 
                "aliases": [
                    "Eken", 
                    "Nordens Venedig", 
                    "sthlm", 
                    "Stockholm, Sweden"
                ]
            }
        ], 
        "created": "2018-02-12T19:53:00"
    }, 
    {
        "ID": "WebQTrn-2888_74c5edd9a79d51772446ff4746bd318f", 
        "webqsp_ID": "WebQTrn-2888", 
        "webqsp_question": "what is the official language in china", 
        "machine_question": "what is the official language in the currency used in the country is Renminbi", 
        "question": "What is the official language that is used in the country that uses Renminbi?", 
        "sparql": "PREFIX ns: <http://rdf.freebase.com/ns/>\nSELECT DISTINCT ?x\nWHERE {\nFILTER (?x != ?c)\nFILTER (!isLiteral(?x) OR lang(?x) = '' OR langMatches(lang(?x), 'en'))\n?c ns:location.country.currency_used ns:m.0hn4_ . \n?c ns:location.country.official_language ?x .\n}\n", 
        "compositionality_type": "composition", 
        "answers": [
            {
                "answer": "Standard Chinese", 
                "answer_id": "m.0653m", 
                "aliases": [
                    "Mandarin Chinese", 
                    "Beifang Fangyan", 
                    "Standard Chinese", 
                    "Putonghua", 
                    "Northern Chinese", 
                    "Guoyu", 
                    "Hui", 
                    "Guanhua", 
                    "Hytad", 
                    "Kuoyu", 
                    "Huayu", 
                    "Hanyu", 
                    "Chinese, Mandarin", 
                    "Qotong", 
                    "Mandarin", 
                    "Chinese, Mandarin Language", 
                    "Standard Mandarin", 
                    "Xui", 
                    "Hui-zu", 
                    "Hoton"
                ]
            }
        ], 
        "created": "2018-02-13T00:50:14"
    }, 
    {
        "ID": "WebQTrn-252_f2ac0ed793fc82b685d4c71e78a53a59", 
        "webqsp_ID": "WebQTrn-252", 
        "webqsp_question": "what kind of government is china", 
        "machine_question": "what kind of government is the tv show The Bride with White Hair was filmed there", 
        "question": "What is the type of government where the tv show The Bride with White Hair was filmed?", 
        "sparql": "PREFIX ns: <http://rdf.freebase.com/ns/>\nSELECT DISTINCT ?x\nWHERE {\nFILTER (?x != ?c)\nFILTER (!isLiteral(?x) OR lang(?x) = '' OR langMatches(lang(?x), 'en'))\n?c ns:tv.tv_location.tv_shows_filmed_here ns:m.0jkvl5n . \n?c ns:location.country.form_of_government ?x .\n}\n", 
        "compositionality_type": "composition", 
        "answers": [
            {
                "answer": "Communist state", 
                "answer_id": "m.01fkst", 
                "aliases": [
                    "Communist"
                ]
            }, 
            {
                "answer": "Socialist state", 
                "answer_id": "m.025tbxf", 
                "aliases": [
                    "Socialist", 
                    "Socialist Republic"
                ]
            }, 
            {
                "answer": "Single-party state", 
                "answer_id": "m.0py4y", 
                "aliases": [
                    "Single-party"
                ]
            }
        ], 
        "created": "2018-02-12T20:07:15"
    }, 
    {
        "ID": "WebQTrn-95_2ef516a3253d8d1d2c28ae11c6d5b2e9", 
        "webqsp_ID": "WebQTrn-95", 
        "webqsp_question": "what kind of money should i take to jamaica", 
        "machine_question": "what kind of money should i take to the country that contains Trelawny Parish", 
        "question": "Which type of money should I bring to the country, that includes the Trelawny Parish?", 
        "sparql": "PREFIX ns: <http://rdf.freebase.com/ns/>\nSELECT DISTINCT ?x\nWHERE {\nFILTER (?x != ?c)\nFILTER (!isLiteral(?x) OR lang(?x) = '' OR langMatches(lang(?x), 'en'))\n?c ns:location.country.administrative_divisions ns:m.06qrc3 . \n?c ns:location.country.currency_used ?x .\n}\n", 
        "compositionality_type": "composition", 
        "answers": [
            {
                "answer": "Jamaican dollar", 
                "answer_id": "m.04xc2m", 
                "aliases": []
            }
        ], 
        "created": "2018-02-12T19:46:17"
    }, 
    {
        "ID": "WebQTest-282_5e7f2ddc862adf547cf031bf067e6af0", 
        "webqsp_ID": "WebQTest-282", 
        "webqsp_question": "which countries share a border with russia", 
        "machine_question": "which countries share a border with russia and the religious organization leadeship is Ukrainian Orthodox Church of the Kyivan Patriarchate", 
        "question": "What bordering country of Russia that has Ukrainian Orthodox Church of the Kyivan Patriarchate?", 
        "sparql": "PREFIX ns: <http://rdf.freebase.com/ns/>\nSELECT DISTINCT ?x\nWHERE {\nFILTER (?x != ns:m.06bnz)\nFILTER (!isLiteral(?x) OR lang(?x) = '' OR langMatches(lang(?x), 'en'))\nns:m.06bnz ns:location.location.adjoin_s ?y .\n?y ns:location.adjoining_relationship.adjoins ?x .\n?x ns:common.topic.notable_types ns:m.01mp .\n?x ns:religion.religious_leadership_jurisdiction.leader ?c .\n?c ns:religion.religious_organization_leadership.organization ns:m.05cx56 . \n}", 
        "compositionality_type": "conjunction", 
        "answers": [
            {
                "answer": "Ukraine", 
                "answer_id": "m.07t21", 
                "aliases": [
                    "Ukraine Region"
                ]
            }
        ], 
        "created": "2018-02-13T03:11:13"
    }, 
    {
        "ID": "WebQTest-1091_e59e67ce229e185f08ce30ce73f32ade", 
        "webqsp_ID": "WebQTest-1091", 
        "webqsp_question": "what type of religions are in the united states", 
        "machine_question": "what type of religions are in the united states and is the religion types of places of worship include Stupa", 
        "question": "What religion in the United States includes Stupa as a place of worship?", 
        "sparql": "PREFIX ns: <http://rdf.freebase.com/ns/>\nSELECT DISTINCT ?x\nWHERE {\nFILTER (?x != ns:m.09c7w0)\nFILTER (!isLiteral(?x) OR lang(?x) = '' OR langMatches(lang(?x), 'en'))\nns:m.09c7w0 ns:location.statistical_region.religions ?y .\n?y ns:location.religion_percentage.religion ?x .\n?x ns:religion.religion.types_of_places_of_worship ns:m.01q4wd . \n}", 
        "compositionality_type": "conjunction", 
        "answers": [
            {
                "answer": "Buddhism", 
                "answer_id": "m.092bf5", 
                "aliases": [
                    "Buddhist"
                ]
            }
        ], 
        "created": "2018-02-13T04:41:33"
    }, 
    {
        "ID": "WebQTrn-2944_f627c1bb9cdbcf6a029c816631a982b2", 
        "webqsp_ID": "WebQTrn-2944", 
        "webqsp_question": "what country is barack obama from", 
        "machine_question": "what country is the person education institution is Noelani Elementary School from", 
        "question": "What country is the famous person who went to Neolani Elementary School from?", 
        "sparql": "PREFIX ns: <http://rdf.freebase.com/ns/>\nSELECT DISTINCT ?x\nWHERE {\nFILTER (?x != ?c)\nFILTER (!isLiteral(?x) OR lang(?x) = '' OR langMatches(lang(?x), 'en'))\n?c ns:people.person.education ?k .\n?k ns:education.education.institution ns:m.0265r_n . \n?c ns:people.person.nationality ?x .\n}\n", 
        "compositionality_type": "composition", 
        "answers": [
            {
                "answer": "United States of America", 
                "answer_id": "m.09c7w0", 
                "aliases": [
                    "U.S. of A.", 
                    "Estats Units d'Am\u00e8rica", 
                    "USA", 
                    "U.S.A.", 
                    "U.S.", 
                    "The States", 
                    "US", 
                    "United States", 
                    "America"
                ]
            }
        ], 
        "created": "2018-02-13T00:56:04"
    }, 
    {
        "ID": "WebQTest-1516_ce349bbfc4fda6f41a7d42856b273229", 
        "webqsp_ID": "WebQTest-1516", 
        "webqsp_question": "where did sanjay gupta go to school", 
        "machine_question": "where did sanjay gupta go to school and the educational institution newspaper is The Michigan Review", 
        "question": "What college did Sanjay Gupta attend that publishes the Michigan Review?", 
        "sparql": "PREFIX ns: <http://rdf.freebase.com/ns/>\nSELECT DISTINCT ?x\nWHERE {\nFILTER (?x != ns:m.02yyk6)\nFILTER (!isLiteral(?x) OR lang(?x) = '' OR langMatches(lang(?x), 'en'))\nns:m.02yyk6 ns:people.person.education ?y .\n?y ns:education.education.institution ?x .\n?x ns:education.educational_institution.newspaper ns:m.03vg_x . \n}", 
        "compositionality_type": "conjunction", 
        "answers": [
            {
                "answer": "University of Michigan", 
                "answer_id": "m.07szy", 
                "aliases": [
                    "michigan", 
                    "University of Michigan, main campus", 
                    "UM", 
                    "University of Michigan, Ann Arbor", 
                    "umich", 
                    "u m", 
                    "u of m"
                ]
            }
        ], 
        "created": "2018-02-13T05:30:14"
    }, 
    {
        "ID": "WebQTrn-3618_af4067282a09f1f96be30768b344827c", 
        "webqsp_ID": "WebQTrn-3618", 
        "webqsp_question": "what team is hank baskett playing for in 2010", 
        "machine_question": "what team is hank baskett playing for in 2010 and is the team has a team moscot named Ragnar", 
        "question": "Which team with a mascot named Ragnar did Hank Baskett play for in 2010?", 
        "sparql": "PREFIX ns: <http://rdf.freebase.com/ns/>\nSELECT DISTINCT ?x\nWHERE {\nFILTER (?x != ns:m.0d81yf)\nFILTER (!isLiteral(?x) OR lang(?x) = '' OR langMatches(lang(?x), 'en'))\nns:m.0d81yf ns:sports.pro_athlete.teams ?y .\n?y ns:sports.sports_team_roster.team ?x .\nFILTER(NOT EXISTS {?y ns:sports.sports_team_roster.from ?sk0} || \nEXISTS {?y ns:sports.sports_team_roster.from ?sk1 . \nFILTER(xsd:datetime(?sk1) <= \"2010-12-31\"^^xsd:dateTime) })\nFILTER(NOT EXISTS {?y ns:sports.sports_team_roster.to ?sk2} || \nEXISTS {?y ns:sports.sports_team_roster.to ?sk3 . \nFILTER(xsd:datetime(?sk3) >= \"2010-01-01\"^^xsd:dateTime) })\n?x ns:sports.sports_team.team_mascot ns:m.0k066pv . \n}", 
        "compositionality_type": "conjunction", 
        "answers": [
            {
                "answer": "Minnesota Vikings", 
                "answer_id": "m.051q5", 
                "aliases": []
            }
        ], 
        "created": "2018-02-13T02:15:14"
    }, 
    {
        "ID": "WebQTrn-3090_bce97f775d11e9e17634619b1a51e310", 
        "webqsp_ID": "WebQTrn-3090", 
        "webqsp_question": "what university did barack obama attend", 
        "machine_question": "what university did barack obama attend and the educational institution newspaper is Columbia Daily Spectator", 
        "question": "Which university that has the Columbia Daily Spectator newspaper did Barack Obama attend?", 
        "sparql": "PREFIX ns: <http://rdf.freebase.com/ns/>\nSELECT DISTINCT ?x\nWHERE {\nFILTER (?x != ns:m.02mjmr)\nFILTER (!isLiteral(?x) OR lang(?x) = '' OR langMatches(lang(?x), 'en'))\nns:m.02mjmr ns:people.person.education ?y .\n?y ns:education.education.institution ?x .\n?x ns:common.topic.notable_types ns:m.01y2hnl .\n?x ns:education.educational_institution.newspaper ns:m.0b6q54 . \n}", 
        "compositionality_type": "conjunction", 
        "answers": [
            {
                "answer": "Columbia University", 
                "answer_id": "m.01w5m", 
                "aliases": [
                    "Columbia University, New York City", 
                    "Columbia U", 
                    "Columbia", 
                    "Columbia University, main campus", 
                    "CU"
                ]
            }
        ], 
        "created": "2018-02-13T01:13:39"
    }, 
    {
        "ID": "WebQTrn-3322_a1edafe051cb7bc171f2beb523d3a90c", 
        "webqsp_ID": "WebQTrn-3322", 
        "webqsp_question": "what countries are on the mediterranean sea", 
        "machine_question": "what countries are on the mediterranean sea and the currency used in the country is CFP franc", 
        "question": "What country located on the Mediterranean uses the currency, CFP franc?", 
        "sparql": "PREFIX ns: <http://rdf.freebase.com/ns/>\nSELECT DISTINCT ?x\nWHERE {\nFILTER (?x != ns:m.04swx)\nFILTER (!isLiteral(?x) OR lang(?x) = '' OR langMatches(lang(?x), 'en'))\nns:m.04swx ns:location.location.adjoin_s ?y .\n?y ns:location.adjoining_relationship.adjoins ?x .\n?x ns:common.topic.notable_types ns:m.01mp .\n?x ns:location.country.currency_used ns:m.01qyjx . \n}", 
        "compositionality_type": "conjunction", 
        "answers": [
            {
                "answer": "France", 
                "answer_id": "m.0f8l9c", 
                "aliases": [
                    "l'Hexagone", 
                    "R\u00e9publique fran\u00e7aise", 
                    "French Republic"
                ]
            }
        ], 
        "created": "2018-02-13T01:39:22"
    }, 
    {
        "ID": "WebQTest-224_471b83eade9707a4dba68e201bf29d73", 
        "webqsp_ID": "WebQTest-224", 
        "webqsp_question": "where did william morris go to college", 
        "machine_question": "where did william morris go to college and the location time zone is Greenwich Mean Time Zone", 
        "question": "William Morris attended college in what location that is in the Greenwich Mean Time Zone?", 
        "sparql": "PREFIX ns: <http://rdf.freebase.com/ns/>\nSELECT DISTINCT ?x\nWHERE {\nFILTER (?x != ns:m.08304)\nFILTER (!isLiteral(?x) OR lang(?x) = '' OR langMatches(lang(?x), 'en'))\nns:m.08304 ns:people.person.education ?y .\n?y ns:education.education.institution ?x .\n?x ns:common.topic.notable_types ns:m.01y2hnl .\n?x ns:location.location.time_zones ns:m.03bdv . \n}", 
        "compositionality_type": "conjunction", 
        "answers": [
            {
                "answer": "University of Oxford", 
                "answer_id": "m.07tgn", 
                "aliases": [
                    "Universitas Oxoniensis", 
                    "Oxford University"
                ]
            }
        ], 
        "created": "2018-02-13T03:01:51"
    }, 
    {
        "ID": "WebQTrn-1782_0a1ce0c1a16bbc65ad41b698703765ff", 
        "webqsp_ID": "WebQTrn-1782", 
        "webqsp_question": "with which country does south africa border", 
        "machine_question": "with which country does south africa border and the country capital is Gaborone", 
        "question": "What country borders South African and has Gaborone as its capital?", 
        "sparql": "PREFIX ns: <http://rdf.freebase.com/ns/>\nSELECT DISTINCT ?x\nWHERE {\nFILTER (?x != ns:m.0hzlz)\nFILTER (!isLiteral(?x) OR lang(?x) = '' OR langMatches(lang(?x), 'en'))\nns:m.0hzlz ns:location.location.adjoin_s ?y .\n?y ns:location.adjoining_relationship.adjoins ?x .\n?x ns:common.topic.notable_types ns:m.01mp .\n?x ns:location.country.capital ns:m.0fndh . \n}", 
        "compositionality_type": "conjunction", 
        "answers": [
            {
                "answer": "Botswana", 
                "answer_id": "m.0166v", 
                "aliases": []
            }
        ], 
        "created": "2018-02-12T22:49:57"
    }, 
    {
        "ID": "WebQTrn-60_66d9f78b8294956373ed9ecbab3318a3", 
        "webqsp_ID": "WebQTrn-60", 
        "webqsp_question": "what countries do people speak portuguese", 
        "machine_question": "what countries do people speak portuguese and is the gdp real adjusted value was once 100236410771.0", 
        "question": "What country with the GDP Real Adjusted Value once of 100236410771.0 do people speak Portuguese?", 
        "sparql": "PREFIX ns: <http://rdf.freebase.com/ns/>\nSELECT DISTINCT ?x\nWHERE {\nFILTER (?x != ns:m.05zjd)\nFILTER (!isLiteral(?x) OR lang(?x) = '' OR langMatches(lang(?x), 'en'))\nns:m.05zjd ns:language.human_language.countries_spoken_in ?x .\n?x ns:location.statistical_region.gdp_real ?c .\n?c ns:measurement_unit.adjusted_money_value.adjusted_value \"100236410771.0\" . \n}", 
        "compositionality_type": "conjunction", 
        "answers": [
            {
                "answer": "South Africa", 
                "answer_id": "m.0hzlz", 
                "aliases": [
                    "Republic of South Africa", 
                    "Republiek van Suid-Afrika"
                ]
            }
        ], 
        "created": "2018-02-12T19:43:48"
    }, 
    {
        "ID": "WebQTrn-1646_0d5bc4f5ce16dafee354662c09965811", 
        "webqsp_ID": "WebQTrn-1646", 
        "webqsp_question": "what does the dominican republic speak", 
        "machine_question": "what does the the country that has the national anthem Valiant Quisqueyans speak", 
        "question": "What are the spoken languages of the country with national anthem Valiant Quisqueuans?", 
        "sparql": "PREFIX ns: <http://rdf.freebase.com/ns/>\nSELECT DISTINCT ?x\nWHERE {\nFILTER (?x != ?c)\nFILTER (!isLiteral(?x) OR lang(?x) = '' OR langMatches(lang(?x), 'en'))\n?c ns:location.country.national_anthem ?k .\n?k ns:government.national_anthem_of_a_country.anthem ns:m.01n3lv . \n?c ns:location.country.languages_spoken ?x .\n}\n", 
        "compositionality_type": "composition", 
        "answers": [
            {
                "answer": "Haitian Creole", 
                "answer_id": "m.02dhwl", 
                "aliases": [
                    "Haitian Creole French", 
                    "Kreyol", 
                    "Aiysyen", 
                    "Plateau Haitian Creole language"
                ]
            }, 
            {
                "answer": "Saman\u00e1 English", 
                "answer_id": "m.06jsg0", 
                "aliases": [
                    "Samana English"
                ]
            }, 
            {
                "answer": "Spanish Language", 
                "answer_id": "m.06nm1", 
                "aliases": [
                    "Espa\u00f1ol", 
                    "Spanish language", 
                    "Castillian", 
                    "Spanish", 
                    "The language of Cervantes", 
                    "Castellano", 
                    "Castillan", 
                    "Castilian"
                ]
            }
        ], 
        "created": "2018-02-12T22:40:00"
    }, 
    {
        "ID": "WebQTest-1675_a70e2adacd0987e9573e6998726b8bc2", 
        "webqsp_ID": "WebQTest-1675", 
        "webqsp_question": "where do the appalachian mountains run through", 
        "machine_question": "where do the appalachian mountains run through and is the location that appointed Stephen Harper to govermental position", 
        "question": "What location appointed Stephen Harper to governmental position andn is where do the Appalachian Mountains run through?", 
        "sparql": "PREFIX ns: <http://rdf.freebase.com/ns/>\nSELECT DISTINCT ?x\nWHERE {\nFILTER (?x != ns:m.0lm0n)\nFILTER (!isLiteral(?x) OR lang(?x) = '' OR langMatches(lang(?x), 'en'))\nns:m.0lm0n ns:location.location.partially_containedby ?x .\n?x ns:government.governmental_jurisdiction.governing_officials ?c .\n?c ns:government.government_position_held.appointed_by ns:m.01k165 . \n}", 
        "compositionality_type": "conjunction", 
        "answers": [
            {
                "answer": "Newfoundland and Labrador", 
                "answer_id": "m.05j49", 
                "aliases": [
                    "Province Of Newfoundland", 
                    "Province De Terre-Neuve", 
                    "Province De Terre-Neuve-Et-Labrador", 
                    "Province Of Newfoundland And Labrador", 
                    "Nfld", 
                    "Terre-Neuve-Et-Labrador"
                ]
            }
        ], 
        "created": "2018-02-13T05:45:54"
    }, 
    {
        "ID": "WebQTrn-1091_ca40169567852c83d8beb13835e326f3", 
        "webqsp_ID": "WebQTrn-1091", 
        "webqsp_question": "when did the raiders win the superbowl", 
        "machine_question": "when did the the sports team owner is Mark Davis win the superbowl", 
        "question": "When did the team owned by Mark Davis win the Superbowl?", 
        "sparql": "PREFIX ns: <http://rdf.freebase.com/ns/>\nSELECT DISTINCT ?x\nWHERE {\nFILTER (?x != ?c)\nFILTER (!isLiteral(?x) OR lang(?x) = '' OR langMatches(lang(?x), 'en'))\n?c ns:sports.professional_sports_team.owner_s ns:m.0hzm4gd . \n?c ns:sports.sports_team.championships ?x .\n}\n", 
        "compositionality_type": "composition", 
        "answers": [
            {
                "answer": "2003 AFC Championship Game", 
                "answer_id": "m.0_gt_px", 
                "aliases": []
            }, 
            {
                "answer": "1967 American Football League Championship Game", 
                "answer_id": "m.02r9cp7", 
                "aliases": [
                    "AFL playoffs, 1967"
                ]
            }, 
            {
                "answer": "Super Bowl XI", 
                "answer_id": "m.076ps", 
                "aliases": []
            }, 
            {
                "answer": "Super Bowl XV", 
                "answer_id": "m.076r4", 
                "aliases": []
            }, 
            {
                "answer": "Super Bowl XVIII", 
                "answer_id": "m.076s5", 
                "aliases": []
            }
        ], 
        "created": "2018-02-12T21:42:02"
    }, 
    {
        "ID": "WebQTrn-2689_0cd7c6fe07b7d1720882656142010618", 
        "webqsp_ID": "WebQTrn-2689", 
        "webqsp_question": "who started up mcdonalds", 
        "machine_question": "who started up the organiztion leadership has a person named Donald Thompson", 
        "question": "Donald Thompson is part of the organization started up by whom?", 
        "sparql": "PREFIX ns: <http://rdf.freebase.com/ns/>\nSELECT DISTINCT ?x\nWHERE {\nFILTER (?x != ?c)\nFILTER (!isLiteral(?x) OR lang(?x) = '' OR langMatches(lang(?x), 'en'))\n?c ns:organization.organization.leadership ?k .\n?k ns:organization.leadership.person ns:m.03wxg7n . \n?c ns:organization.organization.founders ?x .\n}\n", 
        "compositionality_type": "composition", 
        "answers": [
            {
                "answer": "Ray Kroc", 
                "answer_id": "m.01n4dv", 
                "aliases": [
                    "Raymond Albert \"Ray\" Kroc", 
                    "Raymond Albert Kroc"
                ]
            }, 
            {
                "answer": "Richard McDonald", 
                "answer_id": "m.0wf57dc", 
                "aliases": [
                    "Dick McDonald", 
                    "Richard James McDonald"
                ]
            }, 
            {
                "answer": "Maurice McDonald", 
                "answer_id": "m.0wf5829", 
                "aliases": [
                    "Maurice James McDonald", 
                    "Mac McDonald"
                ]
            }
        ], 
        "created": "2018-02-13T00:27:35"
    }, 
    {
        "ID": "WebQTrn-920_f4440609f5cecb091bf8e86adb47be25", 
        "webqsp_ID": "WebQTrn-920", 
        "webqsp_question": "what did egyptians speak", 
        "machine_question": "what did the country that has the national anthem Bilady, Bilady, Bilady speak", 
        "question": "Which languages are used for communication in the nation whose national anthem is Bilady, Bilady, Bilady?", 
        "sparql": "PREFIX ns: <http://rdf.freebase.com/ns/>\nSELECT DISTINCT ?x\nWHERE {\nFILTER (?x != ?c)\nFILTER (!isLiteral(?x) OR lang(?x) = '' OR langMatches(lang(?x), 'en'))\n?c ns:location.country.national_anthem ?k .\n?k ns:government.national_anthem_of_a_country.anthem ns:m.0d9nj_ . \n?c ns:location.country.languages_spoken ?x .\n}\n", 
        "compositionality_type": "composition", 
        "answers": [
            {
                "answer": "Siwi Language", 
                "answer_id": "m.012zfy", 
                "aliases": [
                    "Siwa", 
                    "Siwi", 
                    "Oasis Berber", 
                    "Sioua", 
                    "Zenati"
                ]
            }, 
            {
                "answer": "Modern Standard Arabic", 
                "answer_id": "m.025rvv7", 
                "aliases": [
                    "High Arabic", 
                    "Fasih", 
                    "Modern Literary Arabic", 
                    "Arabic, Standard", 
                    "Al Arabiya", 
                    "Al Fus-ha"
                ]
            }, 
            {
                "answer": "Egyptian Arabic", 
                "answer_id": "m.02hx2cr", 
                "aliases": [
                    "Arabic, Egyptian Spoken", 
                    "Lower Egypt Arabic", 
                    "Arabic, Egyptian Spoken Language", 
                    "Normal Egyptian Arabic", 
                    "Massry"
                ]
            }, 
            {
                "answer": "Sa'idi Arabic", 
                "answer_id": "m.02hxbhg", 
                "aliases": [
                    "Sa`idi", 
                    "Upper Egypt Arabic", 
                    "Sa<idi"
                ]
            }, 
            {
                "answer": "Arabic, Sudanese Spoken Language", 
                "answer_id": "m.035t_3", 
                "aliases": [
                    "Arabic, Sudanese Spoken", 
                    "Khartoum Arabic"
                ]
            }, 
            {
                "answer": "Bedawi Arabic", 
                "answer_id": "m.03wc2kf", 
                "aliases": [
                    "Bedawi", 
                    "Arabic Bedawi language", 
                    "Arabic, Levantine Bedawi Spoken", 
                    "Bedawi Arabic language", 
                    "Eastern Egyptian Bedawi Arabic language", 
                    "Levantine Bedawi Arabic", 
                    "Arabic, Eastern Egyptian Bedawi Spoken Language"
                ]
            }, 
            {
                "answer": "Nobiin Language", 
                "answer_id": "m.051bnt", 
                "aliases": [
                    "Nobiin", 
                    "Fiyadikkya", 
                    "Mahas", 
                    "Mahas-fiadidja", 
                    "Sukot", 
                    "Fadicha", 
                    "Nile Nubian", 
                    "Mahas-fiyadikkya", 
                    "Fadija", 
                    "Fiadidja", 
                    "Fiadidja-mahas", 
                    "Fedicca", 
                    "Fedija", 
                    "Fadicca"
                ]
            }, 
            {
                "answer": "Domari Language", 
                "answer_id": "m.0c4chg", 
                "aliases": [
                    "Tsigene", 
                    "Mehtar", 
                    "Barake", 
                    "Dom", 
                    "Domra Magu Hiya", 
                    "Near-eastern Gypsy", 
                    "Domari", 
                    "Gypsy", 
                    "Middle Eastern Romani", 
                    "Nawari", 
                    "Luti", 
                    "Kurbat", 
                    "Nawar"
                ]
            }, 
            {
                "answer": "Arabic Language", 
                "answer_id": "m.0jzc", 
                "aliases": [
                    "Arabic", 
                    "/m/0jzc", 
                    "\u0639\u0631\u0628\u064a", 
                    "\u0627\u0644\u0644\u063a\u0629 \u0627\u0644\u0639\u0631\u0628\u064a\u0629"
                ]
            }
        ], 
        "created": "2018-02-12T21:20:31"
    }, 
    {
        "ID": "WebQTrn-3511_79be1058ddb2cb965d975574089194f4", 
        "webqsp_ID": "WebQTrn-3511", 
        "webqsp_question": "what currency does turkey accept", 
        "machine_question": "what currency does the country that contains Northern Cyprus accept", 
        "question": "Northern Cyprus is part of the country which accepts which currency?", 
        "sparql": "PREFIX ns: <http://rdf.freebase.com/ns/>\nSELECT DISTINCT ?x\nWHERE {\nFILTER (?x != ?c)\nFILTER (!isLiteral(?x) OR lang(?x) = '' OR langMatches(lang(?x), 'en'))\n?c ns:location.country.administrative_divisions ns:m.01nx28 . \n?c ns:location.country.currency_used ?x .\n}\n", 
        "compositionality_type": "composition", 
        "answers": [
            {
                "answer": "Turkish lira", 
                "answer_id": "m.04dq0w", 
                "aliases": [
                    "Turkish lira (Remonetized)"
                ]
            }
        ], 
        "created": "2018-02-13T02:07:32"
    }, 
    {
        "ID": "WebQTrn-2064_12214188878adf79aec0d51957fbbc5e", 
        "webqsp_ID": "WebQTrn-2064", 
        "webqsp_question": "where is shakira from originally", 
        "machine_question": "where is the artist had a concert tour named Tour Anfibio from originally", 
        "question": "The artist who had a concert tour named Tour Anfibio is originally from where?", 
        "sparql": "PREFIX ns: <http://rdf.freebase.com/ns/>\nSELECT DISTINCT ?x\nWHERE {\nFILTER (?x != ?c)\nFILTER (!isLiteral(?x) OR lang(?x) = '' OR langMatches(lang(?x), 'en'))\n?c ns:music.artist.concert_tours ns:m.09ncdd . \n?c ns:people.person.place_of_birth ?x .\n}\n", 
        "compositionality_type": "composition", 
        "answers": [
            {
                "answer": "Barranquilla", 
                "answer_id": "m.02b84b", 
                "aliases": [
                    "Barranquilla, Colombia"
                ]
            }
        ], 
        "created": "2018-02-12T23:20:40"
    }, 
    {
        "ID": "WebQTest-1043_937500aff40330a671879b7e0acd4337", 
        "webqsp_ID": "WebQTest-1043", 
        "webqsp_question": "what kind of government is mali", 
        "machine_question": "what kind of government is the country capital is Bamako", 
        "question": "What form of government is used in the country with the capital of Bamako?", 
        "sparql": "PREFIX ns: <http://rdf.freebase.com/ns/>\nSELECT DISTINCT ?x\nWHERE {\nFILTER (?x != ?c)\nFILTER (!isLiteral(?x) OR lang(?x) = '' OR langMatches(lang(?x), 'en'))\n?c ns:location.country.capital ns:m.0fn13 . \n?c ns:location.country.form_of_government ?x .\n}\n", 
        "compositionality_type": "composition", 
        "answers": [
            {
                "answer": "Semi-presidential system", 
                "answer_id": "m.01dw03", 
                "aliases": [
                    "Semi-presidential"
                ]
            }, 
            {
                "answer": "Unitary state", 
                "answer_id": "m.01fpfn", 
                "aliases": [
                    "Unitary republic", 
                    "Unitary"
                ]
            }, 
            {
                "answer": "Republic", 
                "answer_id": "m.06cx9", 
                "aliases": []
            }
        ], 
        "created": "2018-02-13T04:33:43"
    }, 
    {
        "ID": "WebQTrn-3534_5222de639f674bf7287afd17bda9fea3", 
        "webqsp_ID": "WebQTrn-3534", 
        "webqsp_question": "who was the secretary of state when richard nixon was president", 
        "machine_question": "who was the secretary of state when richard nixon was president and held his govermental position from after 1969-01-22", 
        "question": "Who held his governmental position from January 22, 1969 and was Secretary of State when Richard Nixon was President?", 
        "sparql": "PREFIX ns: <http://rdf.freebase.com/ns/>\nSELECT DISTINCT ?x\nWHERE {\nFILTER (?x != ns:m.06c97)\nFILTER (!isLiteral(?x) OR lang(?x) = '' OR langMatches(lang(?x), 'en'))\nns:m.06c97 ns:government.political_appointer.appointees ?y .\n?y ns:government.government_position_held.office_holder ?x .\n?y ns:government.government_position_held.basic_title ns:m.0789n .\n?x ns:government.politician.government_positions_held ?c .\n?c ns:government.government_position_held.from ?num .\nFILTER (?num > \"1969-01-22\"^^xsd:dateTime) . \n}", 
        "compositionality_type": "comparative", 
        "answers": [
            {
                "answer": "Henry Kissinger", 
                "answer_id": "m.03k_f", 
                "aliases": [
                    "Dr. Henry A. Kissinger", 
                    "Henry A. Kissinger", 
                    "Henry A Kissinger", 
                    "Dr. Henry Kissinger", 
                    "Heinz Alfred \"Henry\" Kissinger", 
                    "Henry Alfred Kissinger", 
                    "Heinz Alfred Kissinger"
                ]
            }
        ], 
        "created": "2018-02-13T02:08:31"
    }, 
    {
        "ID": "WebQTrn-3407_2458404b2726ce40f3d525263dc9f74c", 
        "webqsp_ID": "WebQTrn-3407", 
        "webqsp_question": "what are the mountains in peru called", 
        "machine_question": "what are the mountains in the country that contains Puno Region called", 
        "question": "What is the name of th mountains where the Puno Region is?", 
        "sparql": "PREFIX ns: <http://rdf.freebase.com/ns/>\nSELECT DISTINCT ?x\nWHERE {\nFILTER (?x != ?c)\nFILTER (!isLiteral(?x) OR lang(?x) = '' OR langMatches(lang(?x), 'en'))\n?c ns:location.country.administrative_divisions ns:m.0355qf . \n?c ns:location.location.partiallycontains ?y .\n?y ns:location.partial_containment_relationship.partially_contains ?x .\n?x ns:common.topic.notable_types ns:m.01xs039 .\n}\n", 
        "compositionality_type": "composition", 
        "answers": [
            {
                "answer": "Andes", 
                "answer_id": "m.0p2n", 
                "aliases": [
                    "Andes Mountains"
                ]
            }
        ], 
        "created": "2018-02-13T01:53:07"
    }, 
    {
        "ID": "WebQTest-406_a188aff4a054e1ec66fafba1b8021f67", 
        "webqsp_ID": "WebQTest-406", 
        "webqsp_question": "who is the coach of the sf giants", 
        "machine_question": "who is the coach of the the sports team owner is Bill Neukom", 
        "question": "Who is the coach of the sports team owned by Bill Neukom?", 
        "sparql": "PREFIX ns: <http://rdf.freebase.com/ns/>\nSELECT DISTINCT ?x\nWHERE {\nFILTER (?x != ?c)\nFILTER (!isLiteral(?x) OR lang(?x) = '' OR langMatches(lang(?x), 'en'))\n?c ns:sports.professional_sports_team.owner_s ns:m.03cyzbv . \n?c ns:baseball.baseball_team.current_coaches ?y .\n?y ns:baseball.current_coaching_tenure.baseball_coach ?x .\n}\n", 
        "compositionality_type": "composition", 
        "answers": [
            {
                "answer": "Bill Hayes", 
                "answer_id": "m.02680w9", 
                "aliases": []
            }, 
            {
                "answer": "Tim Flannery", 
                "answer_id": "m.02plhsr", 
                "aliases": []
            }, 
            {
                "answer": "Dave Righetti", 
                "answer_id": "m.02yf3x", 
                "aliases": []
            }, 
            {
                "answer": "Carney Lansford", 
                "answer_id": "m.057jcc", 
                "aliases": []
            }, 
            {
                "answer": "Roberto Kelly", 
                "answer_id": "m.079w94", 
                "aliases": []
            }, 
            {
                "answer": "Ron Wotus", 
                "answer_id": "m.07w9kn", 
                "aliases": []
            }, 
            {
                "answer": "Mark Gardner", 
                "answer_id": "m.085wxv", 
                "aliases": [
                    "Mark Gardener"
                ]
            }
        ], 
        "created": "2018-02-13T03:27:26"
    }, 
    {
        "ID": "WebQTest-1751_5623836d5cd118afc0825696ca447da2", 
        "webqsp_ID": "WebQTest-1751", 
        "webqsp_question": "what city is acadia university in", 
        "machine_question": "what city is the educational institution newspaper is The Athenaeum in", 
        "question": "In what city would you find the educational institution whose newspaper is The Athenaeum?", 
        "sparql": "PREFIX ns: <http://rdf.freebase.com/ns/>\nSELECT DISTINCT ?x\nWHERE {\nFILTER (?x != ?c)\nFILTER (!isLiteral(?x) OR lang(?x) = '' OR langMatches(lang(?x), 'en'))\n?c ns:education.educational_institution.newspaper ns:m.0dqrzx . \n?c ns:organization.organization.headquarters ?y .\n?y ns:location.mailing_address.citytown ?x .\n}\n", 
        "compositionality_type": "composition", 
        "answers": [
            {
                "answer": "Wolfville", 
                "answer_id": "m.084vj", 
                "aliases": [
                    "Wolfville, Nova Scotia", 
                    "Wolfville, Canada", 
                    "Mud Creek"
                ]
            }
        ], 
        "created": "2018-02-13T05:53:38"
    }, 
    {
        "ID": "WebQTest-751_05b35d4578f375462debb668d601bc6e", 
        "webqsp_ID": "WebQTest-751", 
        "webqsp_question": "who owns google 2012", 
        "machine_question": "who owns the organization that has the leadership role of President of Technology 2012", 
        "question": "Who owns the organization who had a Persident of technology as of 2012?", 
        "sparql": "PREFIX ns: <http://rdf.freebase.com/ns/>\nSELECT DISTINCT ?x\nWHERE {\nFILTER (?x != ?c)\nFILTER (!isLiteral(?x) OR lang(?x) = '' OR langMatches(lang(?x), 'en'))\n?c ns:organization.organization.leadership ?k .\n?k ns:organization.leadership.role ns:m.02_35z8 . \n?c ns:organization.organization.leadership ?y .\n?y ns:organization.leadership.person ?x .\nFILTER(NOT EXISTS {?y ns:organization.leadership.from ?sk0} || \nEXISTS {?y ns:organization.leadership.from ?sk1 . \nFILTER(xsd:datetime(?sk1) <= \"2012-12-31\"^^xsd:dateTime) })\nFILTER(NOT EXISTS {?y ns:organization.leadership.to ?sk2} || \nEXISTS {?y ns:organization.leadership.to ?sk3 . \nFILTER(xsd:datetime(?sk3) >= \"2012-01-01\"^^xsd:dateTime) })\n}\n", 
        "compositionality_type": "composition", 
        "answers": [
            {
                "answer": "Vic Gundotra", 
                "answer_id": "m.025v9nm", 
                "aliases": [
                    "Vivek Gundotra"
                ]
            }, 
            {
                "answer": "Patrick Pichette", 
                "answer_id": "m.04q1q10", 
                "aliases": []
            }, 
            {
                "answer": "Nikesh Arora", 
                "answer_id": "m.05687l1", 
                "aliases": []
            }, 
            {
                "answer": "David Drummond", 
                "answer_id": "m.09v3lbs", 
                "aliases": [
                    "David C Drummond", 
                    "David C. Drummond"
                ]
            }, 
            {
                "answer": "Larry Page", 
                "answer_id": "m.0gjpq", 
                "aliases": [
                    "Lawrence Page", 
                    "Lawrence Edward Page"
                ]
            }
        ], 
        "created": "2018-02-13T04:05:24"
    }, 
    {
        "ID": "WebQTest-167_9898f854a63ef88f8fa3e4be6b2d0b7e", 
        "webqsp_ID": "WebQTest-167", 
        "webqsp_question": "where did queensland get its name from", 
        "machine_question": "where did the location partially contains Culgoa River get its name from", 
        "question": "Whence did a location through which the Culoga River runs get its name?", 
        "sparql": "PREFIX ns: <http://rdf.freebase.com/ns/>\nSELECT DISTINCT ?x\nWHERE {\nFILTER (?x != ?c)\nFILTER (!isLiteral(?x) OR lang(?x) = '' OR langMatches(lang(?x), 'en'))\n?c ns:location.location.partiallycontains ?k .\n?k ns:location.partial_containment_relationship.partially_contains ns:m.028kz2 . \n?c ns:symbols.namesake.named_after ?x .\n}\n", 
        "compositionality_type": "composition", 
        "answers": [
            {
                "answer": "Queen Victoria", 
                "answer_id": "m.0cw10", 
                "aliases": [
                    "Her Majesty The Queen", 
                    "Her Royal Highness Princess Alexandrina Victoria of Kent", 
                    "H.M. Queen Victoria", 
                    "Her Imperial Majesty The Queen-Empress", 
                    "Her Majesty Victoria, by the Grace of God, of the United Kingdom of Great Britain and Ireland Queen, Defender of the Faith, Empress of India", 
                    "Princess Alexandrina Victoria", 
                    "Alexandrina Victoria", 
                    "Victoria", 
                    "Queen Victoria of the United Kingdom"
                ]
            }
        ], 
        "created": "2018-02-13T02:52:43"
    }, 
    {
        "ID": "WebQTrn-1706_3df24202c3356629d2d53d278ef80e20", 
        "webqsp_ID": "WebQTrn-1706", 
        "webqsp_question": "who controls panama", 
        "machine_question": "who controls the country that contains Guna Yala", 
        "question": "The country that contains Guna Yala is controlled by whom?", 
        "sparql": "PREFIX ns: <http://rdf.freebase.com/ns/>\nSELECT DISTINCT ?x\nWHERE {\nFILTER (?x != ?c)\nFILTER (!isLiteral(?x) OR lang(?x) = '' OR langMatches(lang(?x), 'en'))\n?c ns:location.country.administrative_divisions ns:m.01pdr_ . \n?c ns:government.governmental_jurisdiction.governing_officials ?y .\n?y ns:government.government_position_held.office_holder ?x .\n?y ns:government.government_position_held.office_position_or_title ns:m.0m57hp6 .\nFILTER(NOT EXISTS {?y ns:government.government_position_held.from ?sk0} || \nEXISTS {?y ns:government.government_position_held.from ?sk1 . \nFILTER(xsd:datetime(?sk1) <= \"2015-08-10\"^^xsd:dateTime) })\nFILTER(NOT EXISTS {?y ns:government.government_position_held.to ?sk2} || \nEXISTS {?y ns:government.government_position_held.to ?sk3 . \nFILTER(xsd:datetime(?sk3) >= \"2015-08-10\"^^xsd:dateTime) })\n}\n", 
        "compositionality_type": "composition", 
        "answers": [
            {
                "answer": "Juan Carlos Varela", 
                "answer_id": "m.06zmv9x", 
                "aliases": []
            }
        ], 
        "created": "2018-02-12T22:45:19"
    }, 
    {
        "ID": "WebQTrn-870_c5498ca807d2e1ec30d4c8fdd41f0bf7", 
        "webqsp_ID": "WebQTrn-870", 
        "webqsp_question": "what was the milwaukee brewers old name", 
        "machine_question": "what was the the team has a team moscot named Hank old name", 
        "question": "What sports team has Hank Old Name as its mascot?", 
        "sparql": "PREFIX ns: <http://rdf.freebase.com/ns/>\nSELECT DISTINCT ?x\nWHERE {\nFILTER (?x != ?c)\nFILTER (!isLiteral(?x) OR lang(?x) = '' OR langMatches(lang(?x), 'en'))\n?c ns:sports.sports_team.team_mascot ns:m.0100sszz . \n?c ns:sports.sports_team.previously_known_as ?x .\n}\n", 
        "compositionality_type": "composition", 
        "answers": [
            {
                "answer": "Seattle Pilots", 
                "answer_id": "m.0fq2vj2", 
                "aliases": [
                    "Pilots"
                ]
            }
        ], 
        "created": "2018-02-12T21:15:30"
    }, 
    {
        "ID": "WebQTrn-1481_82a243ce931f8f01fb19ee11126237b0", 
        "webqsp_ID": "WebQTrn-1481", 
        "webqsp_question": "who are the current maryland senators", 
        "machine_question": "who are the current maryland senators and held his govermental position from after 1977-01-03", 
        "question": "Who held his governmental position from January 3, 1977 and is a current Maryland senator?", 
        "sparql": "PREFIX ns: <http://rdf.freebase.com/ns/>\nSELECT DISTINCT ?x\nWHERE {\nFILTER (?x != ns:m.04rrd)\nFILTER (!isLiteral(?x) OR lang(?x) = '' OR langMatches(lang(?x), 'en'))\nns:m.04rrd ns:government.political_district.representatives ?y .\n?y ns:government.government_position_held.office_holder ?x .\n?y ns:government.government_position_held.governmental_body ns:m.07t58 .\nFILTER(NOT EXISTS {?y ns:government.government_position_held.from ?sk0} || \nEXISTS {?y ns:government.government_position_held.from ?sk1 . \nFILTER(xsd:datetime(?sk1) <= \"2015-08-10\"^^xsd:dateTime) })\nFILTER(NOT EXISTS {?y ns:government.government_position_held.to ?sk2} || \nEXISTS {?y ns:government.government_position_held.to ?sk3 . \nFILTER(xsd:datetime(?sk3) >= \"2015-08-10\"^^xsd:dateTime) })\n?x ns:government.politician.government_positions_held ?c .\n?c ns:government.government_position_held.from ?num .\nFILTER (?num > \"1977-01-03\"^^xsd:dateTime) . \n}", 
        "compositionality_type": "comparative", 
        "answers": [
            {
                "answer": "Ben Cardin", 
                "answer_id": "m.025k3k", 
                "aliases": [
                    "Benjamin Louis Cardin", 
                    "Benjamin Cardin", 
                    "Benjamin L. Cardin"
                ]
            }, 
            {
                "answer": "Barbara Mikulski", 
                "answer_id": "m.0206nm", 
                "aliases": [
                    "Barbara A. Mikulski", 
                    "Barbara Ann Mikulski"
                ]
            }
        ], 
        "created": "2018-02-12T22:24:54"
    }, 
    {
        "ID": "WebQTest-735_2e6d98fb779ac3b63a5dd2688034c0c9", 
        "webqsp_ID": "WebQTest-735", 
        "webqsp_question": "what kind of money do i need in costa rica", 
        "machine_question": "what kind of money do i need in the country that has the national anthem Noble patria, tu hermosa bandera", 
        "question": "What type of currency is used in the country with Noble patria, tu hermosa bandera as its national anthem?", 
        "sparql": "PREFIX ns: <http://rdf.freebase.com/ns/>\nSELECT DISTINCT ?x\nWHERE {\nFILTER (?x != ?c)\nFILTER (!isLiteral(?x) OR lang(?x) = '' OR langMatches(lang(?x), 'en'))\n?c ns:location.country.national_anthem ?k .\n?k ns:government.national_anthem_of_a_country.anthem ns:m.01lg46 . \n?c ns:location.country.currency_used ?x .\n}\n", 
        "compositionality_type": "composition", 
        "answers": [
            {
                "answer": "Costa Rican col\u00f3n", 
                "answer_id": "m.04wccn", 
                "aliases": [
                    "Costa Rican colon"
                ]
            }
        ], 
        "created": "2018-02-13T04:03:29"
    }, 
    {
        "ID": "WebQTrn-1581_048afa751894ba3400587301a9e1cc7a", 
        "webqsp_ID": "WebQTrn-1581", 
        "webqsp_question": "what was basketball player michael jordan 's major in college", 
        "machine_question": "what was basketball player the person education institution is Emsley A. Laney High School 's major in college", 
        "question": "What was the college major of someone who is a basketball player and went to Emsley A. Laney High School?", 
        "sparql": "PREFIX ns: <http://rdf.freebase.com/ns/>\nSELECT DISTINCT ?x\nWHERE {\nFILTER (?x != ?c)\nFILTER (!isLiteral(?x) OR lang(?x) = '' OR langMatches(lang(?x), 'en'))\n?c ns:people.person.education ?k .\n?k ns:education.education.institution ns:m.07qymj . \n?c ns:people.person.education ?y .\n?y ns:education.education.major_field_of_study ?x .\n}\n", 
        "compositionality_type": "composition", 
        "answers": [
            {
                "answer": "Cultural geography", 
                "answer_id": "m.07xc_j", 
                "aliases": []
            }
        ], 
        "created": "2018-02-12T22:33:26"
    }, 
    {
        "ID": "WebQTrn-2688_c78405f6f2157645f1098f8a871f1bc2", 
        "webqsp_ID": "WebQTrn-2688", 
        "webqsp_question": "what currency is used in france before euro", 
        "machine_question": "what currency is used in the location that appointed Louis-Eug\u00c3\u00a8ne Cavaignac to govermental position before euro", 
        "question": "Which currency is used where Louis-Eug\u00c3\u00a8ne Cavaignac held a government position?", 
        "sparql": "PREFIX ns: <http://rdf.freebase.com/ns/>\nSELECT DISTINCT ?x\nWHERE {\nFILTER (?x != ?c)\nFILTER (!isLiteral(?x) OR lang(?x) = '' OR langMatches(lang(?x), 'en'))\n?c ns:government.governmental_jurisdiction.governing_officials ?k .\n?k ns:government.government_position_held.appointed_by ns:m.01dsxn . \n?c ns:location.country.currency_formerly_used ?x .\n}\n", 
        "compositionality_type": "composition", 
        "answers": [
            {
                "answer": "Assignat", 
                "answer_id": "m.01m4tk", 
                "aliases": []
            }, 
            {
                "answer": "French franc", 
                "answer_id": "m.0298sr", 
                "aliases": []
            }
        ], 
        "created": "2018-02-13T00:27:32"
    }, 
    {
        "ID": "WebQTrn-3556_96992b6a8cc837535770f4d6051eb16e", 
        "webqsp_ID": "WebQTrn-3556", 
        "webqsp_question": "what band did joe satriani play in", 
        "machine_question": "what band did joe satriani play in and is the artist had a concert tour named In Rock World Tour", 
        "question": "What band that had a concert tour named In Rock World Tour did Joe Satriani play in?", 
        "sparql": "PREFIX ns: <http://rdf.freebase.com/ns/>\nSELECT DISTINCT ?x\nWHERE {\nFILTER (?x != ns:m.0j6cj)\nFILTER (!isLiteral(?x) OR lang(?x) = '' OR langMatches(lang(?x), 'en'))\nns:m.0j6cj ns:music.group_member.membership ?y .\n?y ns:music.group_membership.group ?x .\n?x ns:music.artist.concert_tours ns:m.063zr7_ . \n}", 
        "compositionality_type": "conjunction", 
        "answers": [
            {
                "answer": "Deep Purple", 
                "answer_id": "m.0cfgd", 
                "aliases": [
                    "Dep Purple", 
                    "Purple", 
                    "\u6df1\u3044\u7d2b", 
                    "Dee Purple", 
                    "Deep Purple and The Royal Philharmonic Orchestra", 
                    "Deep Purpel", 
                    "DP", 
                    "Dep Purpel"
                ]
            }
        ], 
        "created": "2018-02-13T02:12:18"
    }, 
    {
        "ID": "WebQTrn-551_62727702b28d4bd77c57fd4c90a697bd", 
        "webqsp_ID": "WebQTrn-551", 
        "webqsp_question": "what teams did charles barkley", 
        "machine_question": "what teams did charles barkley and the basket ball team head coach is Jeff Hornacek", 
        "question": "What team with head coach Jeff Hornacek did Charles Barkley play for?", 
        "sparql": "PREFIX ns: <http://rdf.freebase.com/ns/>\nSELECT DISTINCT ?x\nWHERE {\nFILTER (?x != ns:m.01ck_1)\nFILTER (!isLiteral(?x) OR lang(?x) = '' OR langMatches(lang(?x), 'en'))\nns:m.01ck_1 ns:basketball.basketball_player.player_statistics ?y .\n?y ns:basketball.basketball_player_stats.team ?x .\n?x ns:basketball.basketball_team.head_coach ns:m.03bmvc . \n}", 
        "compositionality_type": "conjunction", 
        "answers": [
            {
                "answer": "Phoenix Suns", 
                "answer_id": "m.0jml5", 
                "aliases": [
                    "Suns"
                ]
            }
        ], 
        "created": "2018-02-12T20:43:01"
    }, 
    {
        "ID": "WebQTrn-2319_a109f9eb92e7770f2795631f461e7226", 
        "webqsp_ID": "WebQTrn-2319", 
        "webqsp_question": "what is the official language of the ukraine", 
        "machine_question": "what is the official language of the the religious organization leadeship is Ukrainian Orthodox Church of the Kyivan Patriarchate", 
        "question": "What is the official language of the Ukrainian Orthodox Church of the Kyivan Patriarchate?", 
        "sparql": "PREFIX ns: <http://rdf.freebase.com/ns/>\nSELECT DISTINCT ?x\nWHERE {\nFILTER (?x != ?c)\nFILTER (!isLiteral(?x) OR lang(?x) = '' OR langMatches(lang(?x), 'en'))\n?c ns:religion.religious_leadership_jurisdiction.leader ?k .\n?k ns:religion.religious_organization_leadership.organization ns:m.05cx56 . \n?c ns:location.country.languages_spoken ?x .\n}\n", 
        "compositionality_type": "composition", 
        "answers": [
            {
                "answer": "Albanian language", 
                "answer_id": "m.012v8", 
                "aliases": [
                    "Albanian"
                ]
            }, 
            {
                "answer": "Tatar Language", 
                "answer_id": "m.019yz7", 
                "aliases": [
                    "Tartar", 
                    "Tata'er", 
                    "Tatar"
                ]
            }, 
            {
                "answer": "Moldovan language", 
                "answer_id": "m.01h2j_", 
                "aliases": [
                    "Moldovan"
                ]
            }, 
            {
                "answer": "Romanian Language", 
                "answer_id": "m.02hxc3j", 
                "aliases": [
                    "Daco-rumanian", 
                    "Rumanian", 
                    "Romanian language", 
                    "Moldavian", 
                    "Daco-romanian", 
                    "Romanian", 
                    "Roumanian", 
                    "Moldavan"
                ]
            }, 
            {
                "answer": "Hungarian language", 
                "answer_id": "m.02ztjwg", 
                "aliases": [
                    "Hungarian Language", 
                    "Magyar", 
                    "Hungarian"
                ]
            }, 
            {
                "answer": "Russian Language", 
                "answer_id": "m.06b_j", 
                "aliases": [
                    "Russian language", 
                    "Russit", 
                    "Eluosi", 
                    "Olossu", 
                    "Russian", 
                    "Russ", 
                    "Russki"
                ]
            }, 
            {
                "answer": "Ukrainian Language", 
                "answer_id": "m.0cjk9", 
                "aliases": [
                    "Ukrayins'ka mova", 
                    "Ukrainian"
                ]
            }
        ], 
        "created": "2018-02-12T23:45:55"
    }, 
    {
        "ID": "WebQTest-1507_d2385752e17f38269aa6adb17772e94a", 
        "webqsp_ID": "WebQTest-1507", 
        "webqsp_question": "who was kate chopin", 
        "machine_question": "who was the person education institution is Academy of the Sacred Heart, St. Charles", 
        "question": "What were the professions of the person who went to Academy of the Sacred Heart, St. Charles?", 
        "sparql": "PREFIX ns: <http://rdf.freebase.com/ns/>\nSELECT DISTINCT ?x\nWHERE {\nFILTER (?x != ?c)\nFILTER (!isLiteral(?x) OR lang(?x) = '' OR langMatches(lang(?x), 'en'))\n?c ns:people.person.education ?k .\n?k ns:education.education.institution ns:m.0gvrwq2 . \n?c ns:people.person.profession ?x .\n}\n", 
        "compositionality_type": "composition", 
        "answers": [
            {
                "answer": "Businessperson", 
                "answer_id": "m.012t_z", 
                "aliases": [
                    "Businesswoman", 
                    "Business person", 
                    "Businessman"
                ]
            }, 
            {
                "answer": "Novelist", 
                "answer_id": "m.02xhgwq", 
                "aliases": []
            }, 
            {
                "answer": "Writer", 
                "answer_id": "m.0cbd2", 
                "aliases": [
                    "Scribe", 
                    "Author"
                ]
            }, 
            {
                "answer": "Author", 
                "answer_id": "m.0kyk", 
                "aliases": [
                    "Writer"
                ]
            }
        ], 
        "created": "2018-02-13T05:30:01"
    }, 
    {
        "ID": "WebQTest-1698_828b150f2e484e88647495d57cbbb0db", 
        "webqsp_ID": "WebQTest-1698", 
        "webqsp_question": "where do burmese cats originate from", 
        "machine_question": "where do burmese cats originate from and is the country that contains Ang Thong Province", 
        "question": "Ang Thong Province is part of what country where Burmese cats originate?", 
        "sparql": "PREFIX ns: <http://rdf.freebase.com/ns/>\nSELECT DISTINCT ?x\nWHERE {\nFILTER (?x != ns:m.01mvkt)\nFILTER (!isLiteral(?x) OR lang(?x) = '' OR langMatches(lang(?x), 'en'))\nns:m.01mvkt ns:biology.animal_breed.place_of_origin ?x .\n?x ns:location.country.administrative_divisions ns:m.01_243 . \n}", 
        "compositionality_type": "conjunction", 
        "answers": [
            {
                "answer": "Thailand", 
                "answer_id": "m.07f1x", 
                "aliases": [
                    "Siam", 
                    "Kingdom of Thailand"
                ]
            }
        ], 
        "created": "2018-02-13T05:48:57"
    }, 
    {
        "ID": "WebQTest-963_abf64dfb64b19b3efc6bd3bc86a162c6", 
        "webqsp_ID": "WebQTest-963", 
        "webqsp_question": "who is the miami dolphins quarterback", 
        "machine_question": "who is the the team won the Super Bowl VII championship quarterback", 
        "question": "Who is the quarterback of the Super Bowl VII Championship team?", 
        "sparql": "PREFIX ns: <http://rdf.freebase.com/ns/>\nSELECT DISTINCT ?x\nWHERE {\nFILTER (?x != ?c)\nFILTER (!isLiteral(?x) OR lang(?x) = '' OR langMatches(lang(?x), 'en'))\n?c ns:sports.sports_team.championships ns:m.076nd . \n?c ns:sports.sports_team.roster ?y .\n?y ns:sports.sports_team_roster.player ?x .\n?y ns:sports.sports_team_roster.position ns:m.06b1q .\nFILTER(NOT EXISTS {?y ns:sports.sports_team_roster.from ?sk0} || \nEXISTS {?y ns:sports.sports_team_roster.from ?sk1 . \nFILTER(xsd:datetime(?sk1) <= \"2015-08-10\"^^xsd:dateTime) })\nFILTER(NOT EXISTS {?y ns:sports.sports_team_roster.to ?sk2} || \nEXISTS {?y ns:sports.sports_team_roster.to ?sk3 . \nFILTER(xsd:datetime(?sk3) >= \"2015-08-10\"^^xsd:dateTime) })\n}\n", 
        "compositionality_type": "composition", 
        "answers": [
            {
                "answer": "Matt Moore", 
                "answer_id": "m.027n35s", 
                "aliases": [
                    "Matthew Erickson Moore"
                ]
            }, 
            {
                "answer": "Ryan Tannehill", 
                "answer_id": "m.04q9syl", 
                "aliases": [
                    "Ryan Timothy Tannehill"
                ]
            }
        ], 
        "created": "2018-02-13T04:28:16"
    }, 
    {
        "ID": "WebQTrn-3095_36334ff676e6ea58a121fd5e903a5b64", 
        "webqsp_ID": "WebQTrn-3095", 
        "webqsp_question": "what type of political system is iran", 
        "machine_question": "what type of political system is the country that has the national anthem National Anthem of the Islamic Republic of Iran", 
        "question": "Which system of government can be found in the country that has a national anthem called National Anthem of the Islamic Republic of Iran?", 
        "sparql": "PREFIX ns: <http://rdf.freebase.com/ns/>\nSELECT DISTINCT ?x\nWHERE {\nFILTER (?x != ?c)\nFILTER (!isLiteral(?x) OR lang(?x) = '' OR langMatches(lang(?x), 'en'))\n?c ns:location.country.national_anthem ?k .\n?k ns:government.national_anthem_of_a_country.anthem ns:m.02lwm6 . \n?c ns:location.country.form_of_government ?x .\n}\n", 
        "compositionality_type": "composition", 
        "answers": [
            {
                "answer": "Parliamentary system", 
                "answer_id": "m.018wl5", 
                "aliases": [
                    "Parliamentary", 
                    "Parliamentary Democracy"
                ]
            }, 
            {
                "answer": "Presidential system", 
                "answer_id": "m.01d9r3", 
                "aliases": [
                    "Presidential"
                ]
            }, 
            {
                "answer": "Islamic republic", 
                "answer_id": "m.01fgl7", 
                "aliases": [
                    "Islamic"
                ]
            }, 
            {
                "answer": "Unitary state", 
                "answer_id": "m.01fpfn", 
                "aliases": [
                    "Unitary republic", 
                    "Unitary"
                ]
            }, 
            {
                "answer": "Theocracy", 
                "answer_id": "m.07lg6", 
                "aliases": []
            }
        ], 
        "created": "2018-02-13T01:14:03"
    }, 
    {
        "ID": "WebQTrn-2565_2921c8358f87ea24dedbb94a57799d62", 
        "webqsp_ID": "WebQTrn-2565", 
        "webqsp_question": "what is there to do in palm springs", 
        "machine_question": "what is there to do in palm springs and is the zoo that opened on 1970", 
        "question": "What is a thing to do in Palm Springs and is a zoo that opened in 1970?", 
        "sparql": "PREFIX ns: <http://rdf.freebase.com/ns/>\nSELECT DISTINCT ?x\nWHERE {\nFILTER (?x != ns:m.0r3tq)\nFILTER (!isLiteral(?x) OR lang(?x) = '' OR langMatches(lang(?x), 'en'))\nns:m.0r3tq ns:travel.travel_destination.tourist_attractions ?x .\n?x ns:zoos.zoo.opened \"1970\"^^xsd:dateTime . \n}", 
        "compositionality_type": "conjunction", 
        "answers": [
            {
                "answer": "Living Desert Zoo and Gardens", 
                "answer_id": "m.08__9v", 
                "aliases": [
                    "The Living Desert"
                ]
            }
        ], 
        "created": "2018-02-13T00:10:51"
    }, 
    {
        "ID": "WebQTrn-323_1df3c4ff928707f87381b9327b5e0663", 
        "webqsp_ID": "WebQTrn-323", 
        "webqsp_question": "where was the roman colosseum located", 
        "machine_question": "where was the roman colosseum located and is the city that hosted 1960 Summer Olympics", 
        "question": "What city has Roman Colosseum and hosted 1960 Summer Olympics?", 
        "sparql": "PREFIX ns: <http://rdf.freebase.com/ns/>\nSELECT DISTINCT ?x\nWHERE {\nFILTER (?x != ns:m.0d5qx)\nFILTER (!isLiteral(?x) OR lang(?x) = '' OR langMatches(lang(?x), 'en'))\nns:m.0d5qx ns:location.location.containedby ?x .\n?x ns:olympics.olympic_host_city.olympics_hosted ns:m.0lbd9 . \n}", 
        "compositionality_type": "conjunction", 
        "answers": [
            {
                "answer": "Rome", 
                "answer_id": "m.06c62", 
                "aliases": [
                    "the City of seven hills", 
                    "Roma", 
                    "Rome, Italy", 
                    "The eternal City", 
                    "\u0420\u0438\u043c", 
                    "Comune of Rome", 
                    "Caput Mundi"
                ]
            }
        ], 
        "created": "2018-02-12T20:14:38"
    }, 
    {
        "ID": "WebQTest-595_d95da5fb8a16d81fe56cd4ce00843254", 
        "webqsp_ID": "WebQTest-595", 
        "webqsp_question": "when is the last time the ravens won a superbowl", 
        "machine_question": "when is the last time the the sports team with the fight song The Baltimore Fight Song won a superbowl", 
        "question": "The sports team with the fight song The Baltimore Fight Song last won which Superbowl?", 
        "sparql": "PREFIX ns: <http://rdf.freebase.com/ns/>\nSELECT DISTINCT ?x\nWHERE {\nFILTER (?x != ?c)\nFILTER (!isLiteral(?x) OR lang(?x) = '' OR langMatches(lang(?x), 'en'))\n?c ns:sports.sports_team.fight_song ns:m.0hn47qp . \n?c ns:sports.sports_team.championships ?x .\n?x ns:sports.sports_championship_event.championship ns:m.06x5s .\n?x ns:time.event.end_date ?sk0 .\n}\nORDER BY DESC(xsd:datetime(?sk0))\nLIMIT 1\n", 
        "compositionality_type": "composition", 
        "answers": [
            {
                "answer": "Super Bowl XLVII", 
                "answer_id": "m.0642vqv", 
                "aliases": [
                    "Super Bowl 2013", 
                    "Super Bowl 47"
                ]
            }
        ], 
        "created": "2018-02-13T03:49:15"
    }, 
    {
        "ID": "WebQTest-1036_4e73509d14bda62590480b655eee8751", 
        "webqsp_ID": "WebQTest-1036", 
        "webqsp_question": "what is the dominant language spoken in jamaica", 
        "machine_question": "what is the dominant language spoken in the currency used in the country is Jamaican dollar", 
        "question": "What language is spoken in the country that uses the Jamacian Dollar?", 
        "sparql": "PREFIX ns: <http://rdf.freebase.com/ns/>\nSELECT DISTINCT ?x\nWHERE {\nFILTER (?x != ?c)\nFILTER (!isLiteral(?x) OR lang(?x) = '' OR langMatches(lang(?x), 'en'))\n?c ns:location.country.currency_used ns:m.04xc2m . \n?c ns:location.country.official_language ?x .\n}\n", 
        "compositionality_type": "composition", 
        "answers": [
            {
                "answer": "Jamaican English", 
                "answer_id": "m.01428y", 
                "aliases": []
            }
        ], 
        "created": "2018-02-13T04:32:49"
    }, 
    {
        "ID": "WebQTest-1835_682800b1263c4a6d5b650e4196fc2b7d", 
        "webqsp_ID": "WebQTest-1835", 
        "webqsp_question": "what country did gregor mendel live in", 
        "machine_question": "what country did gregor mendel live in and the location time zone is Central European Time Zone", 
        "question": "What city in Central European Time Zone did Gregor Mendel live in?", 
        "sparql": "PREFIX ns: <http://rdf.freebase.com/ns/>\nSELECT DISTINCT ?x\nWHERE {\nFILTER (?x != ns:m.039c5)\nFILTER (!isLiteral(?x) OR lang(?x) = '' OR langMatches(lang(?x), 'en'))\nns:m.039c5 ns:people.person.places_lived ?y .\n?y ns:people.place_lived.location ?x .\n?x ns:location.location.time_zones ns:m.02llzg . \n}", 
        "compositionality_type": "conjunction", 
        "answers": [
            {
                "answer": "Brno", 
                "answer_id": "m.0fs_s", 
                "aliases": [
                    "Brno, Czech Republic"
                ]
            }
        ], 
        "created": "2018-02-13T06:08:10"
    }, 
    {
        "ID": "WebQTrn-293_739a4ec5ca332d6efd1026d01da45302", 
        "webqsp_ID": "WebQTrn-293", 
        "webqsp_question": "what are the basic beliefs of sikhism", 
        "machine_question": "what are the basic beliefs of the religion text is Mul Mantar", 
        "question": "The religious text Mul Mantar has what basic beliefs?", 
        "sparql": "PREFIX ns: <http://rdf.freebase.com/ns/>\nSELECT DISTINCT ?x\nWHERE {\nFILTER (?x != ?c)\nFILTER (!isLiteral(?x) OR lang(?x) = '' OR langMatches(lang(?x), 'en'))\n?c ns:religion.religion.texts ns:m.060zh1 . \n?c ns:religion.religion.beliefs ?x .\n}\n", 
        "compositionality_type": "composition", 
        "answers": [
            {
                "answer": "Sa\u1e43s\u0101ra", 
                "answer_id": "m.017kx3", 
                "aliases": [
                    "Sams\u0101ra", 
                    "Sansara", 
                    "Sangs\u0101ra"
                ]
            }, 
            {
                "answer": "Dharma", 
                "answer_id": "m.02fbl", 
                "aliases": []
            }, 
            {
                "answer": "Karma", 
                "answer_id": "m.049hc", 
                "aliases": []
            }, 
            {
                "answer": "Monotheism", 
                "answer_id": "m.04xy3", 
                "aliases": []
            }, 
            {
                "answer": "Reincarnation", 
                "answer_id": "m.06fmt", 
                "aliases": []
            }, 
            {
                "answer": "Pyaar", 
                "answer_id": "m.0c576t", 
                "aliases": [
                    "Pyare"
                ]
            }
        ], 
        "created": "2018-02-12T20:12:00"
    }, 
    {
        "ID": "WebQTrn-114_eaa7a9f669e0d6d5caf732fd225ff411", 
        "webqsp_ID": "WebQTrn-114", 
        "webqsp_question": "what religion are people in russia", 
        "machine_question": "what religion are people in the location that appointed Vladimir Putin to govermental position", 
        "question": "What religion do the people in the location that appointed Vladimir Putin to a governmental position?", 
        "sparql": "PREFIX ns: <http://rdf.freebase.com/ns/>\nSELECT DISTINCT ?x\nWHERE {\nFILTER (?x != ?c)\nFILTER (!isLiteral(?x) OR lang(?x) = '' OR langMatches(lang(?x), 'en'))\n?c ns:government.governmental_jurisdiction.governing_officials ?k .\n?k ns:government.government_position_held.appointed_by ns:m.08193 . \n?c ns:location.statistical_region.religions ?y .\n?y ns:location.religion_percentage.religion ?x .\n}\n", 
        "compositionality_type": "composition", 
        "answers": [
            {
                "answer": "Russian Orthodox Church", 
                "answer_id": "m.0b06q", 
                "aliases": [
                    "Russian Orthodox"
                ]
            }, 
            {
                "answer": "Islam", 
                "answer_id": "m.0flw86", 
                "aliases": []
            }
        ], 
        "created": "2018-02-12T19:48:45"
    }, 
    {
        "ID": "WebQTrn-3549_279ab36d62e499754cff2b68b31a1f78", 
        "webqsp_ID": "WebQTrn-3549", 
        "webqsp_question": "where did hurricane irene", 
        "machine_question": "where did hurricane irene and is the co2 emiisions per capita was once 1960 metric ton", 
        "question": "Where did Hurricane Irene hit that once had CO2 emissions at 1960 metric tons per capita?", 
        "sparql": "PREFIX ns: <http://rdf.freebase.com/ns/>\nSELECT DISTINCT ?x\nWHERE {\nFILTER (?x != ns:m.02p70bg)\nFILTER (!isLiteral(?x) OR lang(?x) = '' OR langMatches(lang(?x), 'en'))\nns:m.02p70bg ns:meteorology.tropical_cyclone.affected_areas ?x .\n?x ns:location.statistical_region.co2_emissions_per_capita ?c .\n?c ns:measurement_unit.dated_metric_ton.date \"1960\"^^xsd:dateTime . \n}", 
        "compositionality_type": "conjunction", 
        "answers": [
            {
                "answer": "Bahamas", 
                "answer_id": "m.0160w", 
                "aliases": [
                    "Commonwealth of The Bahamas"
                ]
            }, 
            {
                "answer": "Bahamas", 
                "answer_id": "m.0160w", 
                "aliases": [
                    "Commonwealth of The Bahamas"
                ]
            }, 
            {
                "answer": "Dominican Republic", 
                "answer_id": "m.027rn", 
                "aliases": [
                    "Rep\u00fablica Dominicana"
                ]
            }, 
            {
                "answer": "Dominican Republic", 
                "answer_id": "m.027rn", 
                "aliases": [
                    "Rep\u00fablica Dominicana"
                ]
            }
        ], 
        "created": "2018-02-13T02:11:17"
    }, 
    {
        "ID": "WebQTrn-2807_9829997ca2dfe1b10e4e25b11596cee1", 
        "webqsp_ID": "WebQTrn-2807", 
        "webqsp_question": "what did james k polk believe in", 
        "machine_question": "what did james k polk believe in and the religion place of worship is Trinity Independent Chapel", 
        "question": "Which religion did James K. Polk believe in, where the religious place of worship is the Trinity Independent Chapel?", 
        "sparql": "PREFIX ns: <http://rdf.freebase.com/ns/>\nSELECT DISTINCT ?x\nWHERE {\nFILTER (?x != ns:m.042f1)\nFILTER (!isLiteral(?x) OR lang(?x) = '' OR langMatches(lang(?x), 'en'))\nns:m.042f1 ns:people.person.religion ?x .\n?x ns:religion.religion.places_of_worship ns:m.0261cbz . \n}", 
        "compositionality_type": "conjunction", 
        "answers": [
            {
                "answer": "Methodism", 
                "answer_id": "m.051kv", 
                "aliases": [
                    "Methodist Church"
                ]
            }
        ], 
        "created": "2018-02-13T00:42:32"
    }, 
    {
        "ID": "WebQTest-848_6ce0bfb1dc28b46f3b510d06f0bfd59d", 
        "webqsp_ID": "WebQTest-848", 
        "webqsp_question": "where are the nordic countries", 
        "machine_question": "where are the nordic countries and is the location that appointed Helle Thorning-Schmidt to govermental position", 
        "question": "What Nordic country does Helle Thorning-Schmidt hold a government position in?", 
        "sparql": "PREFIX ns: <http://rdf.freebase.com/ns/>\nSELECT DISTINCT ?x\nWHERE {\nFILTER (?x != ns:m.0140mf)\nFILTER (!isLiteral(?x) OR lang(?x) = '' OR langMatches(lang(?x), 'en'))\nns:m.0140mf ns:location.location.contains ?x .\n?x ns:common.topic.notable_types ns:m.01mp .\n?x ns:government.governmental_jurisdiction.governing_officials ?c .\n?c ns:government.government_position_held.appointed_by ns:m.05rn5r . \n}", 
        "compositionality_type": "conjunction", 
        "answers": [
            {
                "answer": "Denmark", 
                "answer_id": "m.0k6nt", 
                "aliases": [
                    "D\u00e4nemark", 
                    "Kingdom of Denmark", 
                    "Kongeriget Danmark", 
                    "\u4e39\u9ea6"
                ]
            }
        ], 
        "created": "2018-02-13T04:15:58"
    }, 
    {
        "ID": "WebQTest-1462_af331f33579006dfcc57fbac05c58c9c", 
        "webqsp_ID": "WebQTest-1462", 
        "webqsp_question": "who is running for vice president with barack obama 2012", 
        "machine_question": "who is running for vice president with the person who once lived in White House 2012", 
        "question": "Who was the Vice-President to the President in the White House in 2012?", 
        "sparql": "PREFIX ns: <http://rdf.freebase.com/ns/>\nSELECT DISTINCT ?x\nWHERE {\nFILTER (?x != ?c)\nFILTER (!isLiteral(?x) OR lang(?x) = '' OR langMatches(lang(?x), 'en'))\n?c ns:people.person.places_lived ?k .\n?k ns:people.place_lived.location ns:m.081sq . \n?c ns:government.us_president.vice_president ?x .\n}\n", 
        "compositionality_type": "composition", 
        "answers": [
            {
                "answer": "Joe Biden", 
                "answer_id": "m.012gx2", 
                "aliases": [
                    "Vice President of the United States Joe Biden", 
                    "Senator Joseph Biden", 
                    "Joseph R. Biden, Jr.", 
                    "Joseph Biden", 
                    "Vice President Joe Biden", 
                    "Big-hearted Joe", 
                    "Sen Joseph Biden", 
                    "Sen. Joe Biden", 
                    "Sen Joe Biden", 
                    "Joseph Robinette Biden", 
                    "Joseph Robinette Biden Jr.", 
                    "Sen. Joseph Biden", 
                    "Senator Joe Biden"
                ]
            }
        ], 
        "created": "2018-02-13T05:23:01"
    }, 
    {
        "ID": "WebQTrn-80_11db4f7612af25f15a1aa06eb3be1d81", 
        "webqsp_ID": "WebQTrn-80", 
        "webqsp_question": "who was vincent van gogh inspired by", 
        "machine_question": "who was vincent van gogh inspired by and is the illustrator of the book The Fish, the Fighters, and the Song- girl", 
        "question": "What is the name of the illustrator of the book The Fish, the Fighters and the Song girl who inspired Vincent Van Gogh?", 
        "sparql": "PREFIX ns: <http://rdf.freebase.com/ns/>\nSELECT DISTINCT ?x\nWHERE {\nFILTER (?x != ns:m.07_m2)\nFILTER (!isLiteral(?x) OR lang(?x) = '' OR langMatches(lang(?x), 'en'))\nns:m.07_m2 ns:influence.influence_node.influenced_by ?x .\n?x ns:book.illustrator.books_illustrated ns:m.0c09z_9 . \n}", 
        "compositionality_type": "conjunction", 
        "answers": [
            {
                "answer": "Peter Paul Rubens", 
                "answer_id": "m.0pwnh", 
                "aliases": [
                    "Peter Paul Rubens, follower of", 
                    "Pedro Pablo Rubens"
                ]
            }
        ], 
        "created": "2018-02-12T19:45:28"
    }, 
    {
        "ID": "WebQTrn-731_cce0bbacf79f0cdd58835dcf6e9ef9b6", 
        "webqsp_ID": "WebQTrn-731", 
        "webqsp_question": "how many languages are there in the philippines", 
        "machine_question": "how many languages are there in the the location partially contains Asian College of Science and Technology, main campus", 
        "question": "What languages are spoken in the county where Asian College of Science and Technology, Main Campus is located in?", 
        "sparql": "PREFIX ns: <http://rdf.freebase.com/ns/>\nSELECT DISTINCT ?x\nWHERE {\nFILTER (?x != ?c)\nFILTER (!isLiteral(?x) OR lang(?x) = '' OR langMatches(lang(?x), 'en'))\n?c ns:location.location.partiallycontains ?k .\n?k ns:location.partial_containment_relationship.partially_contains ns:m.0jwbft1 . \n?c ns:location.country.languages_spoken ?x .\n}\n", 
        "compositionality_type": "composition", 
        "answers": [
            {
                "answer": "Filipino language", 
                "answer_id": "m.01jb8r", 
                "aliases": [
                    "Filipino"
                ]
            }, 
            {
                "answer": "Cebuano language", 
                "answer_id": "m.01zfd7", 
                "aliases": [
                    "Bisayan", 
                    "Sugbuhanon", 
                    "Sugbuanon", 
                    "Cebuano Language", 
                    "Sebuano", 
                    "\u30f4\u30a3\u30b5\u30e4\u8a9e", 
                    "\u30bb\u30d6\u8a9e", 
                    "Visayan", 
                    "Binisaya", 
                    "\u30d3\u30b5\u30e4\u8a9e", 
                    "Cebuano"
                ]
            }, 
            {
                "answer": "Ilokano language", 
                "answer_id": "m.025hmd", 
                "aliases": [
                    "Ilokano", 
                    "Ilocano", 
                    "Iloko", 
                    "Ilocano Language"
                ]
            }, 
            {
                "answer": "English Language", 
                "answer_id": "m.02h40lc", 
                "aliases": [
                    "Sekgoa", 
                    "Anglit", 
                    "English language", 
                    "English"
                ]
            }, 
            {
                "answer": "Waray-Waray Language", 
                "answer_id": "m.02hxntx", 
                "aliases": [
                    "Samare\u00f1o", 
                    "Samar-leyte", 
                    "Waray-Waray", 
                    "Waray", 
                    "Samaran", 
                    "Binisaya", 
                    "Waray-Waray language"
                ]
            }, 
            {
                "answer": "Pangasinan Language", 
                "answer_id": "m.02p9hz", 
                "aliases": [
                    "Pangasinan"
                ]
            }, 
            {
                "answer": "Hiligaynon language", 
                "answer_id": "m.032db0", 
                "aliases": [
                    "Hiligainon", 
                    "Hiligaynon Language", 
                    "Ilonggo", 
                    "Hiligaynon", 
                    "\u30a4\u30ed\u30f3\u30b4\u8a9e", 
                    "Illogo"
                ]
            }, 
            {
                "answer": "Kapampangan language", 
                "answer_id": "m.03323g", 
                "aliases": [
                    "\u30ab\u30d1\u30f3\u30d1\u30f3\u30ac\u8a9e", 
                    "Kapampangan", 
                    "Capampan\u0360gan", 
                    "Pampangan", 
                    "Pampango", 
                    "Pampangue\u00f1o"
                ]
            }, 
            {
                "answer": "Tagalog language", 
                "answer_id": "m.07qv_", 
                "aliases": [
                    "Pilipino", 
                    "Filipino", 
                    "Tagalog", 
                    "Tagalog Language"
                ]
            }
        ], 
        "created": "2018-02-12T20:59:38"
    }, 
    {
        "ID": "WebQTrn-1369_ac8783214291dd6266059cb275378880", 
        "webqsp_ID": "WebQTrn-1369", 
        "webqsp_question": "who is lamar odom playing for in 2012", 
        "machine_question": "who is lamar odom playing for in 2012 and the basket ball team head coach is Rick Carlisle", 
        "question": "Which team coached by Rick Carlisle did Lamar Odom play for in 2012?", 
        "sparql": "PREFIX ns: <http://rdf.freebase.com/ns/>\nSELECT DISTINCT ?x\nWHERE {\nFILTER (?x != ns:m.02_nkp)\nFILTER (!isLiteral(?x) OR lang(?x) = '' OR langMatches(lang(?x), 'en'))\nns:m.02_nkp ns:sports.pro_athlete.teams ?y .\n?y ns:sports.sports_team_roster.team ?x .\nFILTER(NOT EXISTS {?y ns:sports.sports_team_roster.from ?sk0} || \nEXISTS {?y ns:sports.sports_team_roster.from ?sk1 . \nFILTER(xsd:datetime(?sk1) <= \"2012-12-31\"^^xsd:dateTime) })\nFILTER(NOT EXISTS {?y ns:sports.sports_team_roster.to ?sk2} || \nEXISTS {?y ns:sports.sports_team_roster.to ?sk3 . \nFILTER(xsd:datetime(?sk3) >= \"2012-01-01\"^^xsd:dateTime) })\n?x ns:basketball.basketball_team.head_coach ns:m.02zxw4 . \n}", 
        "compositionality_type": "conjunction", 
        "answers": [
            {
                "answer": "Dallas Mavericks", 
                "answer_id": "m.0jmcv", 
                "aliases": [
                    "Mavs", 
                    "Mavericks"
                ]
            }
        ], 
        "created": "2018-02-12T22:10:37"
    }, 
    {
        "ID": "WebQTrn-391_f362abad7b6bfb65226e7318d8bfd31f", 
        "webqsp_ID": "WebQTrn-391", 
        "webqsp_question": "what is the political system in south africa", 
        "machine_question": "what is the political system in the location that appointed Thabo Mbeki to govermental position", 
        "question": "What type of political system is in place where Thabo Mbeki holds a government position?", 
        "sparql": "PREFIX ns: <http://rdf.freebase.com/ns/>\nSELECT DISTINCT ?x\nWHERE {\nFILTER (?x != ?c)\nFILTER (!isLiteral(?x) OR lang(?x) = '' OR langMatches(lang(?x), 'en'))\n?c ns:government.governmental_jurisdiction.governing_officials ?k .\n?k ns:government.government_position_held.appointed_by ns:m.07q13 . \n?c ns:location.country.form_of_government ?x .\n}\n", 
        "compositionality_type": "composition", 
        "answers": [
            {
                "answer": "Constitutional republic", 
                "answer_id": "m.0c9rw5", 
                "aliases": [
                    "Constitutional"
                ]
            }, 
            {
                "answer": "Parliamentary republic", 
                "answer_id": "m.0glnsx", 
                "aliases": [
                    "Parliamentary"
                ]
            }
        ], 
        "created": "2018-02-12T20:20:51"
    }, 
    {
        "ID": "WebQTrn-825_2c5578b60f78b9c33714a070508b9b27", 
        "webqsp_ID": "WebQTrn-825", 
        "webqsp_question": "what to see in chicago downtown", 
        "machine_question": "what to see in chicago downtown and is the museum that was established in 1893-09-16", 
        "question": "What museum is there to see in downtown Chicago that was was established on September 16, 1893?", 
        "sparql": "PREFIX ns: <http://rdf.freebase.com/ns/>\nSELECT DISTINCT ?x\nWHERE {\nFILTER (?x != ns:m.01_d4)\nFILTER (!isLiteral(?x) OR lang(?x) = '' OR langMatches(lang(?x), 'en'))\nns:m.01_d4 ns:travel.travel_destination.tourist_attractions ?x .\n?x ns:location.location.containedby ns:m.01_d4 .\n?x ns:architecture.museum.established \"1893-09-16\"^^xsd:dateTime . \n}", 
        "compositionality_type": "conjunction", 
        "answers": [
            {
                "answer": "Field Museum of Natural History", 
                "answer_id": "m.021czc", 
                "aliases": [
                    "In Association with The Field Museum", 
                    "Field Museum of Natural History, Chicago", 
                    "The Field Museum of Natural History"
                ]
            }
        ], 
        "created": "2018-02-12T21:05:14"
    }, 
    {
        "ID": "WebQTrn-2261_ebbb01712f3eb1443b2895961ec14272", 
        "webqsp_ID": "WebQTrn-2261", 
        "webqsp_question": "when did the chicago bulls win their first championship", 
        "machine_question": "when did the the team has a team moscot named Benny the Bull win their first championship", 
        "question": "When was the first championship won by the team whose mascot is Benny the Bull?", 
        "sparql": "PREFIX ns: <http://rdf.freebase.com/ns/>\nSELECT DISTINCT ?x\nWHERE {\nFILTER (?x != ?c)\nFILTER (!isLiteral(?x) OR lang(?x) = '' OR langMatches(lang(?x), 'en'))\n?c ns:sports.sports_team.team_mascot ns:m.067z_k . \n?c ns:sports.sports_team.championships ?x .\n?x ns:time.event.start_date ?sk0 .\n}\nORDER BY xsd:datetime(?sk0)\nLIMIT 1\n", 
        "compositionality_type": "composition", 
        "answers": [
            {
                "answer": "1991 NBA Finals", 
                "answer_id": "m.08x9qv", 
                "aliases": []
            }
        ], 
        "created": "2018-02-12T23:39:48"
    }, 
    {
        "ID": "WebQTest-255_bce97f775d11e9e17634619b1a51e310", 
        "webqsp_ID": "WebQTest-255", 
        "webqsp_question": "where obama went to school", 
        "machine_question": "where obama went to school and the educational institution newspaper is Columbia Daily Spectator", 
        "question": "Where did Obama go to school where the newspaper was the \"Columbia Daily Spectator\"?", 
        "sparql": "PREFIX ns: <http://rdf.freebase.com/ns/>\nSELECT DISTINCT ?x\nWHERE {\nFILTER (?x != ns:m.02mjmr)\nFILTER (!isLiteral(?x) OR lang(?x) = '' OR langMatches(lang(?x), 'en'))\nns:m.02mjmr ns:people.person.education ?y .\n?y ns:education.education.institution ?x .\n?x ns:education.educational_institution.newspaper ns:m.0b6q54 . \n}", 
        "compositionality_type": "conjunction", 
        "answers": [
            {
                "answer": "Columbia University", 
                "answer_id": "m.01w5m", 
                "aliases": [
                    "Columbia University, New York City", 
                    "Columbia U", 
                    "Columbia", 
                    "Columbia University, main campus", 
                    "CU"
                ]
            }
        ], 
        "created": "2018-02-13T03:06:01"
    }, 
    {
        "ID": "WebQTrn-2262_bedad6538f5c6114bfe9f92e6c0dfaf0", 
        "webqsp_ID": "WebQTrn-2262", 
        "webqsp_question": "which four states touch mexico", 
        "machine_question": "which four states touch the country that has the national anthem Himno Nacional Mexicano", 
        "question": "What state is adjacent to the country with national anthem Himno Nacional Mexicano?", 
        "sparql": "PREFIX ns: <http://rdf.freebase.com/ns/>\nSELECT DISTINCT ?x\nWHERE {\nFILTER (?x != ?c)\nFILTER (!isLiteral(?x) OR lang(?x) = '' OR langMatches(lang(?x), 'en'))\n?c ns:location.country.national_anthem ?k .\n?k ns:government.national_anthem_of_a_country.anthem ns:m.012144 . \n?c ns:location.location.adjoin_s ?y .\n?y ns:location.adjoining_relationship.adjoins ?x .\n?x ns:common.topic.notable_types ns:m.0kpys4 .\n}\n", 
        "compositionality_type": "composition", 
        "answers": [
            {
                "answer": "California", 
                "answer_id": "m.01n7q", 
                "aliases": [
                    "California, USA", 
                    "Calif", 
                    "CA", 
                    "Golden State"
                ]
            }
        ], 
        "created": "2018-02-12T23:40:11"
    }, 
    {
        "ID": "WebQTrn-468_56426be0d7b0e75f58d47948c71dc75d", 
        "webqsp_ID": "WebQTrn-468", 
        "webqsp_question": "what countries does queen elizabeth ii reign", 
        "machine_question": "what countries does queen elizabeth ii reign and is the country that contains Hawke's Bay", 
        "question": "What country containing Hawke's Bay did Queen Elizabeth II reign?", 
        "sparql": "PREFIX ns: <http://rdf.freebase.com/ns/>\nSELECT DISTINCT ?x\nWHERE {\nFILTER (?x != ns:m.0d1_f)\nFILTER (!isLiteral(?x) OR lang(?x) = '' OR langMatches(lang(?x), 'en'))\nns:m.0d1_f ns:government.politician.government_positions_held ?y .\n?y ns:government.government_position_held.jurisdiction_of_office ?x .\n?x ns:location.country.administrative_divisions ns:m.0125s7 . \n}", 
        "compositionality_type": "conjunction", 
        "answers": [
            {
                "answer": "New Zealand", 
                "answer_id": "m.0ctw_b", 
                "aliases": [
                    "God's own", 
                    "NZ", 
                    "Land of the long white cloud", 
                    "Aotearoa"
                ]
            }
        ], 
        "created": "2018-02-12T20:31:53"
    }, 
    {
        "ID": "WebQTest-1608_50cf52311d0cdd04337ffc0d5378b1b8", 
        "webqsp_ID": "WebQTest-1608", 
        "webqsp_question": "what language is mainly spoken in egypt", 
        "machine_question": "what language is mainly spoken in the location partially contains Gebel Elba", 
        "question": "In the area which partially contains Gebel Elba, what is the main language?", 
        "sparql": "PREFIX ns: <http://rdf.freebase.com/ns/>\nSELECT DISTINCT ?x\nWHERE {\nFILTER (?x != ?c)\nFILTER (!isLiteral(?x) OR lang(?x) = '' OR langMatches(lang(?x), 'en'))\n?c ns:location.location.partiallycontains ?k .\n?k ns:location.partial_containment_relationship.partially_contains ns:m.026cy73 . \n?c ns:location.country.languages_spoken ?x .\n?x ns:language.human_language.main_country ?c .\n}\n", 
        "compositionality_type": "composition", 
        "answers": [
            {
                "answer": "Siwi Language", 
                "answer_id": "m.012zfy", 
                "aliases": [
                    "Siwa", 
                    "Siwi", 
                    "Oasis Berber", 
                    "Sioua", 
                    "Zenati"
                ]
            }, 
            {
                "answer": "Egyptian Arabic", 
                "answer_id": "m.02hx2cr", 
                "aliases": [
                    "Arabic, Egyptian Spoken", 
                    "Lower Egypt Arabic", 
                    "Arabic, Egyptian Spoken Language", 
                    "Normal Egyptian Arabic", 
                    "Massry"
                ]
            }, 
            {
                "answer": "Sa'idi Arabic", 
                "answer_id": "m.02hxbhg", 
                "aliases": [
                    "Sa`idi", 
                    "Upper Egypt Arabic", 
                    "Sa<idi"
                ]
            }, 
            {
                "answer": "Bedawi Arabic", 
                "answer_id": "m.03wc2kf", 
                "aliases": [
                    "Bedawi", 
                    "Arabic Bedawi language", 
                    "Arabic, Levantine Bedawi Spoken", 
                    "Bedawi Arabic language", 
                    "Eastern Egyptian Bedawi Arabic language", 
                    "Levantine Bedawi Arabic", 
                    "Arabic, Eastern Egyptian Bedawi Spoken Language"
                ]
            }
        ], 
        "created": "2018-02-13T05:39:23"
    }, 
    {
        "ID": "WebQTrn-104_b0ec4891d80892c6499b17b0c8c363e2", 
        "webqsp_ID": "WebQTrn-104", 
        "webqsp_question": "who was the president after jfk died", 
        "machine_question": "who was the president after the person notable with the medical condition Addison's disease died", 
        "question": "Which US President succeeded the President known for having Addison;s disease after their death?", 
        "sparql": "PREFIX ns: <http://rdf.freebase.com/ns/>\nSELECT DISTINCT ?x\nWHERE {\nFILTER (?x != ?c)\nFILTER (!isLiteral(?x) OR lang(?x) = '' OR langMatches(lang(?x), 'en'))\n?c ns:medicine.notable_person_with_medical_condition.condition ns:m.01xtf2 . \n?c ns:government.us_president.vice_president ?x .\n}\n", 
        "compositionality_type": "composition", 
        "answers": [
            {
                "answer": "Lyndon B. Johnson", 
                "answer_id": "m.0f7fy", 
                "aliases": [
                    "President Lyndon Johnson", 
                    "LBJ", 
                    "L.B.J.", 
                    "Johnson, Lyndon B.", 
                    "Lyndon Johnson", 
                    "Sen. Lyndon B. Johnson", 
                    "Lindon B. Johnson", 
                    "Lyndon B Johnson", 
                    "Lyndon Baines Johnson", 
                    "Landslide Lyndon", 
                    "Johnson, Light Bulb", 
                    "President Lyndon B. Johnson"
                ]
            }
        ], 
        "created": "2018-02-12T19:47:11"
    }, 
    {
        "ID": "WebQTrn-3450_41dc3630dc72bd145cface35be66dbcd", 
        "webqsp_ID": "WebQTrn-3450", 
        "webqsp_question": "what city is the state capital of washington", 
        "machine_question": "what city is the state capital of the major exports industry Fixed-wing aircraft", 
        "question": "The major exports industry Fixed-wing Aircraft is in what city?", 
        "sparql": "PREFIX ns: <http://rdf.freebase.com/ns/>\nSELECT DISTINCT ?x\nWHERE {\nFILTER (?x != ?c)\nFILTER (!isLiteral(?x) OR lang(?x) = '' OR langMatches(lang(?x), 'en'))\n?c ns:location.statistical_region.major_exports ?k .\n?k ns:location.imports_exports_by_industry.industry ns:m.0cmf2 . \n?c ns:base.aareas.schema.administrative_area.capital ?x .\n}\n", 
        "compositionality_type": "composition", 
        "answers": [
            {
                "answer": "Olympia", 
                "answer_id": "m.0fw1y", 
                "aliases": [
                    "Thurston County / Olympia city", 
                    "Olympia, Washington"
                ]
            }
        ], 
        "created": "2018-02-13T01:57:40"
    }, 
    {
        "ID": "WebQTrn-1867_caed60a4b7eaeb420ff538bc5f258ae7", 
        "webqsp_ID": "WebQTrn-1867", 
        "webqsp_question": "what 4 countries are part of the united kingdom", 
        "machine_question": "what 4 countries are part of the united kingdom and is the country that contains Ballymena", 
        "question": "Which of the 4 countries which are part of the United Kingdom is home to Ballymena City?", 
        "sparql": "PREFIX ns: <http://rdf.freebase.com/ns/>\nSELECT DISTINCT ?x\nWHERE {\nFILTER (?x != ns:m.07ssc)\nFILTER (!isLiteral(?x) OR lang(?x) = '' OR langMatches(lang(?x), 'en'))\nns:m.07ssc ns:base.aareas.schema.administrative_area.administrative_children ?x .\n?x ns:location.country.administrative_divisions ns:m.04_zbj . \n}", 
        "compositionality_type": "conjunction", 
        "answers": [
            {
                "answer": "Northern Ireland", 
                "answer_id": "m.05bcl", 
                "aliases": [
                    "the occupied six counties", 
                    "the six counties", 
                    "the North of Ireland"
                ]
            }
        ], 
        "created": "2018-02-12T23:00:45"
    }, 
    {
        "ID": "WebQTrn-2857_40fc1b722a2751d37a49b1915da41f1a", 
        "webqsp_ID": "WebQTrn-2857", 
        "webqsp_question": "what 4 states border the pacific ocean", 
        "machine_question": "what 4 states border the pacific ocean and is the us state that has a capital named Olympia", 
        "question": "Which of the 4 states bordering the Pacific Ocean has a capital named Olympia?", 
        "sparql": "PREFIX ns: <http://rdf.freebase.com/ns/>\nSELECT DISTINCT ?x\nWHERE {\nFILTER (?x != ns:m.05rgl)\nFILTER (!isLiteral(?x) OR lang(?x) = '' OR langMatches(lang(?x), 'en'))\nns:m.05rgl ns:location.location.adjoin_s ?y .\n?y ns:location.adjoining_relationship.adjoins ?x .\n?x ns:common.topic.notable_types ns:m.0kpys4 .\n?x ns:location.us_state.capital ns:m.0fw1y . \n}", 
        "compositionality_type": "conjunction", 
        "answers": [
            {
                "answer": "Washington", 
                "answer_id": "m.081yw", 
                "aliases": [
                    "Washington, Madras", 
                    "Wash", 
                    "WA"
                ]
            }
        ], 
        "created": "2018-02-13T00:48:26"
    }, 
    {
        "ID": "WebQTrn-3351_635f92c7aef5d820133b2cf3337a73e3", 
        "webqsp_ID": "WebQTrn-3351", 
        "webqsp_question": "what does china border", 
        "machine_question": "what does china border and is the country that contains Republic of Crimea", 
        "question": "What Asian country bordering china annexed the Republic of Crimea from the Ukraine through aggressive military invasion?", 
        "sparql": "PREFIX ns: <http://rdf.freebase.com/ns/>\nSELECT DISTINCT ?x\nWHERE {\nFILTER (?x != ns:m.0d05w3)\nFILTER (!isLiteral(?x) OR lang(?x) = '' OR langMatches(lang(?x), 'en'))\nns:m.0d05w3 ns:location.location.adjoin_s ?y .\n?y ns:location.adjoining_relationship.adjoins ?x .\n?x ns:location.country.administrative_divisions ns:m.0100sl5y . \n}", 
        "compositionality_type": "conjunction", 
        "answers": [
            {
                "answer": "Russia", 
                "answer_id": "m.06bnz", 
                "aliases": [
                    "Russian Federation", 
                    "\u0420\u043e\u0441\u0441\u0438\u044f"
                ]
            }
        ], 
        "created": "2018-02-13T01:44:16"
    }, 
    {
        "ID": "WebQTrn-3315_abc143e50fcf4915c8267215915795b5", 
        "webqsp_ID": "WebQTrn-3315", 
        "webqsp_question": "what years have the steelers won the super bowl", 
        "machine_question": "what years have the the team has a team moscot named Steely McBeam won the super bowl", 
        "question": "What year was the Super Bowl won by the team with the mascot Steely McBeam?", 
        "sparql": "PREFIX ns: <http://rdf.freebase.com/ns/>\nSELECT DISTINCT ?x\nWHERE {\nFILTER (?x != ?c)\nFILTER (!isLiteral(?x) OR lang(?x) = '' OR langMatches(lang(?x), 'en'))\n?c ns:sports.sports_team.team_mascot ns:m.02x0cyj . \n?c ns:sports.sports_team.championships ?x .\n}\n", 
        "compositionality_type": "composition", 
        "answers": [
            {
                "answer": "2011 AFC Championship Game", 
                "answer_id": "m.0_gt_jy", 
                "aliases": []
            }, 
            {
                "answer": "2009 AFC Championship Game", 
                "answer_id": "m.0_gt_lv", 
                "aliases": []
            }, 
            {
                "answer": "2006 AFC Championship Game", 
                "answer_id": "m.0_gt_my", 
                "aliases": []
            }, 
            {
                "answer": "Super Bowl XL", 
                "answer_id": "m.032tn6", 
                "aliases": []
            }, 
            {
                "answer": "Super Bowl XLIII", 
                "answer_id": "m.04n7r5", 
                "aliases": [
                    "Super Bowl 43", 
                    "Super Bowl 2009"
                ]
            }, 
            {
                "answer": "Super Bowl IX", 
                "answer_id": "m.076p2", 
                "aliases": []
            }, 
            {
                "answer": "Super Bowl X", 
                "answer_id": "m.076pf", 
                "aliases": []
            }, 
            {
                "answer": "Super Bowl XIII", 
                "answer_id": "m.076qg", 
                "aliases": []
            }, 
            {
                "answer": "Super Bowl XIV", 
                "answer_id": "m.076qt", 
                "aliases": []
            }, 
            {
                "answer": "1996 AFC Championship Game", 
                "answer_id": "m.0hzps_h", 
                "aliases": [
                    "1995 AFC Championship game"
                ]
            }
        ], 
        "created": "2018-02-13T01:37:39"
    }, 
    {
        "ID": "WebQTrn-104_42588c6fd3d30a777953bbaf2b4079b9", 
        "webqsp_ID": "WebQTrn-104", 
        "webqsp_question": "who was the president after jfk died", 
        "machine_question": "who was the president after the person education institution is Edward Devotion School died", 
        "question": "Who took over the role of president when the person who attended Edward Devotion School lost his life?", 
        "sparql": "PREFIX ns: <http://rdf.freebase.com/ns/>\nSELECT DISTINCT ?x\nWHERE {\nFILTER (?x != ?c)\nFILTER (!isLiteral(?x) OR lang(?x) = '' OR langMatches(lang(?x), 'en'))\n?c ns:people.person.education ?k .\n?k ns:education.education.institution ns:m.0ccg42 . \n?c ns:government.us_president.vice_president ?x .\n}\n", 
        "compositionality_type": "composition", 
        "answers": [
            {
                "answer": "Lyndon B. Johnson", 
                "answer_id": "m.0f7fy", 
                "aliases": [
                    "President Lyndon Johnson", 
                    "LBJ", 
                    "L.B.J.", 
                    "Johnson, Lyndon B.", 
                    "Lyndon Johnson", 
                    "Sen. Lyndon B. Johnson", 
                    "Lindon B. Johnson", 
                    "Lyndon B Johnson", 
                    "Lyndon Baines Johnson", 
                    "Landslide Lyndon", 
                    "Johnson, Light Bulb", 
                    "President Lyndon B. Johnson"
                ]
            }
        ], 
        "created": "2018-02-12T19:47:11"
    }, 
    {
        "ID": "WebQTrn-1166_82ba7a28dcbd66ab8e128c8975b2e692", 
        "webqsp_ID": "WebQTrn-1166", 
        "webqsp_question": "what type of political system does iran have", 
        "machine_question": "what type of political system does the country that contains Tehran Province have", 
        "question": "What type of political system does the country that has Tehran Province have?", 
        "sparql": "PREFIX ns: <http://rdf.freebase.com/ns/>\nSELECT DISTINCT ?x\nWHERE {\nFILTER (?x != ?c)\nFILTER (!isLiteral(?x) OR lang(?x) = '' OR langMatches(lang(?x), 'en'))\n?c ns:location.country.administrative_divisions ns:m.01ct02 . \n?c ns:location.country.form_of_government ?x .\n}\n", 
        "compositionality_type": "composition", 
        "answers": [
            {
                "answer": "Parliamentary system", 
                "answer_id": "m.018wl5", 
                "aliases": [
                    "Parliamentary", 
                    "Parliamentary Democracy"
                ]
            }, 
            {
                "answer": "Presidential system", 
                "answer_id": "m.01d9r3", 
                "aliases": [
                    "Presidential"
                ]
            }, 
            {
                "answer": "Islamic republic", 
                "answer_id": "m.01fgl7", 
                "aliases": [
                    "Islamic"
                ]
            }, 
            {
                "answer": "Unitary state", 
                "answer_id": "m.01fpfn", 
                "aliases": [
                    "Unitary republic", 
                    "Unitary"
                ]
            }, 
            {
                "answer": "Theocracy", 
                "answer_id": "m.07lg6", 
                "aliases": []
            }
        ], 
        "created": "2018-02-12T21:49:58"
    }, 
    {
        "ID": "WebQTrn-1299_abc143e50fcf4915c8267215915795b5", 
        "webqsp_ID": "WebQTrn-1299", 
        "webqsp_question": "when was the last superbowl win for the steelers", 
        "machine_question": "when was the last superbowl win for the the team has a team moscot named Steely McBeam", 
        "question": "When was the last time the team with mascot named Steely McBeam with the Superbowl?", 
        "sparql": "PREFIX ns: <http://rdf.freebase.com/ns/>\nSELECT DISTINCT ?x\nWHERE {\nFILTER (?x != ?c)\nFILTER (!isLiteral(?x) OR lang(?x) = '' OR langMatches(lang(?x), 'en'))\n?c ns:sports.sports_team.team_mascot ns:m.02x0cyj . \n?c ns:sports.sports_team.championships ?x .\n?x ns:common.topic.notable_types ns:m.01xljv1 .\n?x ns:time.event.end_date ?sk0 .\n}\nORDER BY DESC(xsd:datetime(?sk0))\nLIMIT 1\n", 
        "compositionality_type": "composition", 
        "answers": [
            {
                "answer": "Super Bowl XLIII", 
                "answer_id": "m.04n7r5", 
                "aliases": [
                    "Super Bowl 43", 
                    "Super Bowl 2009"
                ]
            }
        ], 
        "created": "2018-02-12T22:02:37"
    }, 
    {
        "ID": "WebQTrn-399_43d4ab7c33c218299fc7ed0a2a23afb9", 
        "webqsp_ID": "WebQTrn-399", 
        "webqsp_question": "what is in liverpool england", 
        "machine_question": "what is in liverpool england and is the structure construction started in before 1908", 
        "question": "What structure is in Liverpool England that was built before 1908?", 
        "sparql": "PREFIX ns: <http://rdf.freebase.com/ns/>\nSELECT DISTINCT ?x\nWHERE {\nFILTER (?x != ns:m.04lh6)\nFILTER (!isLiteral(?x) OR lang(?x) = '' OR langMatches(lang(?x), 'en'))\nns:m.04lh6 ns:travel.travel_destination.tourist_attractions ?x .\n?x ns:architecture.structure.construction_started ?num .\nFILTER (?num < \"1908\"^^xsd:dateTime) . \n}", 
        "compositionality_type": "comparative", 
        "answers": [
            {
                "answer": "St George's Hall, Liverpool", 
                "answer_id": "m.04150b", 
                "aliases": [
                    "Saint George's Hall, Liverpool"
                ]
            }
        ], 
        "created": "2018-02-12T20:21:11"
    }, 
    {
        "ID": "WebQTest-352_7ec73f80f5651536b5cbad4058f96dea", 
        "webqsp_ID": "WebQTest-352", 
        "webqsp_question": "what did albert speer design", 
        "machine_question": "what did the architect that desinged Reich Chancellery design", 
        "question": "What buildings were designed by the architect who was responsible for the Reich Chancellery?", 
        "sparql": "PREFIX ns: <http://rdf.freebase.com/ns/>\nSELECT DISTINCT ?x\nWHERE {\nFILTER (?x != ?c)\nFILTER (!isLiteral(?x) OR lang(?x) = '' OR langMatches(lang(?x), 'en'))\n?c ns:architecture.architect.structures_designed ns:m.04j99j . \n?c ns:architecture.architect.structures_designed ?x .\n}\n", 
        "compositionality_type": "composition", 
        "answers": [
            {
                "answer": "Olympiastadion", 
                "answer_id": "m.03js7d", 
                "aliases": [
                    "Olympic Stadium, Berlin", 
                    "Olympiastadion Berlin", 
                    "Olympiastadion", 
                    "Olympic Stadium"
                ]
            }, 
            {
                "answer": "Reich Chancellery", 
                "answer_id": "m.04j99j", 
                "aliases": [
                    "Reich Chancellery, Berlin"
                ]
            }, 
            {
                "answer": "Deutsches Stadion", 
                "answer_id": "m.06cwrf", 
                "aliases": []
            }, 
            {
                "answer": "Volkshalle", 
                "answer_id": "m.06ft3z", 
                "aliases": [
                    "Volkshalle, Berlin"
                ]
            }
        ], 
        "created": "2018-02-13T03:21:38"
    }, 
    {
        "ID": "WebQTrn-1399_100036bec6e91d6f17d29ab0809b8be5", 
        "webqsp_ID": "WebQTrn-1399", 
        "webqsp_question": "what country is next to russia", 
        "machine_question": "what country is next to russia and the currency used in the country is Ukrainian hryvnia", 
        "question": "What country next to Russia uses the Ukrainian Hryvnia currency?", 
        "sparql": "PREFIX ns: <http://rdf.freebase.com/ns/>\nSELECT DISTINCT ?x\nWHERE {\nFILTER (?x != ns:m.06bnz)\nFILTER (!isLiteral(?x) OR lang(?x) = '' OR langMatches(lang(?x), 'en'))\nns:m.06bnz ns:location.location.adjoin_s ?y .\n?y ns:location.adjoining_relationship.adjoins ?x .\n?x ns:common.topic.notable_types ns:m.01mp .\n?x ns:location.country.currency_used ns:m.035qkb . \n}", 
        "compositionality_type": "conjunction", 
        "answers": [
            {
                "answer": "Ukraine", 
                "answer_id": "m.07t21", 
                "aliases": [
                    "Ukraine Region"
                ]
            }
        ], 
        "created": "2018-02-12T22:14:10"
    }, 
    {
        "ID": "WebQTest-1248_209dc96af55c6a84e51503b7e7f1b2a2", 
        "webqsp_ID": "WebQTest-1248", 
        "webqsp_question": "where is nineveh city", 
        "machine_question": "where is nineveh city and the country capital is Baghdad", 
        "question": "Where is Nineveh City located and whose country has the capital of Baghdad?", 
        "sparql": "PREFIX ns: <http://rdf.freebase.com/ns/>\nSELECT DISTINCT ?x\nWHERE {\nFILTER (?x != ns:m.05fym)\nFILTER (!isLiteral(?x) OR lang(?x) = '' OR langMatches(lang(?x), 'en'))\nns:m.05fym ns:location.location.containedby ?x .\n?x ns:location.country.capital ns:m.01fqm . \n}", 
        "compositionality_type": "conjunction", 
        "answers": [
            {
                "answer": "Iraq", 
                "answer_id": "m.0d05q4", 
                "aliases": []
            }
        ], 
        "created": "2018-02-13T04:56:37"
    }, 
    {
        "ID": "WebQTest-1011_86003187e9869b0e46e6897f8de751a7", 
        "webqsp_ID": "WebQTest-1011", 
        "webqsp_question": "where do they speak tibetan", 
        "machine_question": "where do they speak tibetan and the currency used in the country is Renminbi", 
        "question": "Where do they speak Tibetan and and use the currency Renminbi?", 
        "sparql": "PREFIX ns: <http://rdf.freebase.com/ns/>\nSELECT DISTINCT ?x\nWHERE {\nFILTER (?x != ns:m.064r7fk)\nFILTER (!isLiteral(?x) OR lang(?x) = '' OR langMatches(lang(?x), 'en'))\nns:m.064r7fk ns:language.human_language.main_country ?x .\n?x ns:location.country.currency_used ns:m.0hn4_ . \n}", 
        "compositionality_type": "conjunction", 
        "answers": [
            {
                "answer": "China", 
                "answer_id": "m.0d05w3", 
                "aliases": [
                    "People's Republic of China"
                ]
            }
        ], 
        "created": "2018-02-13T04:31:15"
    }, 
    {
        "ID": "WebQTrn-3351_81bcd31f4543403774b83eaa26c377cd", 
        "webqsp_ID": "WebQTrn-3351", 
        "webqsp_question": "what does china border", 
        "machine_question": "what does china border and the location time zone is Korea Time Zone", 
        "question": "What country bordering China that is in Korea Time Zone?", 
        "sparql": "PREFIX ns: <http://rdf.freebase.com/ns/>\nSELECT DISTINCT ?x\nWHERE {\nFILTER (?x != ns:m.0d05w3)\nFILTER (!isLiteral(?x) OR lang(?x) = '' OR langMatches(lang(?x), 'en'))\nns:m.0d05w3 ns:location.location.adjoin_s ?y .\n?y ns:location.adjoining_relationship.adjoins ?x .\n?x ns:location.location.time_zones ns:m.019zjx . \n}", 
        "compositionality_type": "conjunction", 
        "answers": [
            {
                "answer": "North Korea", 
                "answer_id": "m.05b7q", 
                "aliases": [
                    "Democratic People's Republic of Korea", 
                    "DPRK"
                ]
            }
        ], 
        "created": "2018-02-13T01:44:16"
    }, 
    {
        "ID": "WebQTrn-2403_c921b749358cad585bef51203d0462af", 
        "webqsp_ID": "WebQTrn-2403", 
        "webqsp_question": "what is the buddhist holy book", 
        "machine_question": "what is the the religion belief is Samudaya sacca holy book", 
        "question": "What is the holy book of the Samudaya Sacca religion?", 
        "sparql": "PREFIX ns: <http://rdf.freebase.com/ns/>\nSELECT DISTINCT ?x\nWHERE {\nFILTER (?x != ?c)\nFILTER (!isLiteral(?x) OR lang(?x) = '' OR langMatches(lang(?x), 'en'))\n?c ns:religion.religion.beliefs ns:m.0hzmzgg . \n?c ns:religion.religion.texts ?x .\n}\n", 
        "compositionality_type": "composition", 
        "answers": [
            {
                "answer": "P\u0101li Canon", 
                "answer_id": "m.01hnwm", 
                "aliases": [
                    "Tipitaka"
                ]
            }, 
            {
                "answer": "Dhammapada", 
                "answer_id": "m.01nv3q", 
                "aliases": []
            }, 
            {
                "answer": "Mah\u0101y\u0101na s\u016btras", 
                "answer_id": "m.01r1g7", 
                "aliases": []
            }, 
            {
                "answer": "Vimalakirti Sutra", 
                "answer_id": "m.01rky9", 
                "aliases": []
            }, 
            {
                "answer": "Tibetan Buddhist canon", 
                "answer_id": "m.02k1bj", 
                "aliases": []
            }, 
            {
                "answer": "Chinese Buddhist canon", 
                "answer_id": "m.02l3dj", 
                "aliases": []
            }, 
            {
                "answer": "\u015ar\u012bm\u0101l\u0101dev\u012b Si\u1e43han\u0101da S\u016btra", 
                "answer_id": "m.036z9c", 
                "aliases": []
            }, 
            {
                "answer": "Mah\u0101vastu", 
                "answer_id": "m.04_13vt", 
                "aliases": []
            }, 
            {
                "answer": "Amitabha Sutra", 
                "answer_id": "m.04k1b0", 
                "aliases": []
            }, 
            {
                "answer": "\u0100gama", 
                "answer_id": "m.05_m24", 
                "aliases": []
            }, 
            {
                "answer": "Gang\u014dji Garan Engi", 
                "answer_id": "m.05mwk22", 
                "aliases": []
            }, 
            {
                "answer": "U\u1e63\u1e47\u012b\u1e63a Vijaya Dh\u0101ra\u1e47\u012b S\u016btra", 
                "answer_id": "m.0c00_gk", 
                "aliases": [
                    "U\u1e63\u1e47\u012b\u1e63a Vijaya Dh\u0101ra\u1e47\u012b"
                ]
            }, 
            {
                "answer": "Longchen Nyingthig", 
                "answer_id": "m.0c4pcl", 
                "aliases": [
                    "Longchen Nyingtig"
                ]
            }, 
            {
                "answer": "N\u012blaka\u1e47\u1e6dha Dh\u0101ra\u1e47\u012b", 
                "answer_id": "m.0fs6g7", 
                "aliases": [
                    "D\u00e0b\u0113i Zh\u00f2u", 
                    "Mah\u0101 Karu\u1e47\u0101 Dh\u0101ran\u012b", 
                    "Great Compassion Mantra"
                ]
            }
        ], 
        "created": "2018-02-12T23:52:43"
    }, 
    {
        "ID": "WebQTrn-1366_f8b14f87e45a3c125ddca4590ab997ce", 
        "webqsp_ID": "WebQTrn-1366", 
        "webqsp_question": "who did kat graham play in parent trap", 
        "machine_question": "who did kat graham play in the film has a charcter named Hallie Parker", 
        "question": "In the film with the character Hallie Parker, who did Kat Graham play?", 
        "sparql": "PREFIX ns: <http://rdf.freebase.com/ns/>\nSELECT DISTINCT ?x\nWHERE {\nFILTER (?x != ?c)\nFILTER (!isLiteral(?x) OR lang(?x) = '' OR langMatches(lang(?x), 'en'))\n?c ns:film.film.starring ?k .\n?k ns:film.performance.character ns:m.04hykr_ . \n?c ns:film.film.starring ?y .\n?y ns:film.performance.character ?x .\n?y ns:film.performance.actor ns:m.04n1xdl .\n}\n", 
        "compositionality_type": "composition", 
        "answers": [
            {
                "answer": "Jackie", 
                "answer_id": "m.0gft0zl", 
                "aliases": []
            }
        ], 
        "created": "2018-02-12T22:10:32"
    }, 
    {
        "ID": "WebQTrn-1457_baddf3510d6e3a410d643d0d48d9d88e", 
        "webqsp_ID": "WebQTrn-1457", 
        "webqsp_question": "what is capital city of ontario", 
        "machine_question": "what is capital city of the religious leader is William Lauder", 
        "question": "What is the capital city where William Lauder is a religious leader?", 
        "sparql": "PREFIX ns: <http://rdf.freebase.com/ns/>\nSELECT DISTINCT ?x\nWHERE {\nFILTER (?x != ?c)\nFILTER (!isLiteral(?x) OR lang(?x) = '' OR langMatches(lang(?x), 'en'))\n?c ns:religion.religious_leadership_jurisdiction.leader ?k .\n?k ns:religion.religious_organization_leadership.leader ns:m.0yt2j0q . \n?c ns:location.province.capital ?x .\n}\n", 
        "compositionality_type": "composition", 
        "answers": [
            {
                "answer": "Toronto", 
                "answer_id": "m.0h7h6", 
                "aliases": [
                    "T.O.", 
                    "City of Toronto", 
                    "Toronto, Ontario", 
                    "T Dot", 
                    "tranna", 
                    "Toronto, Ontario, Canada", 
                    "Toronto, Canada", 
                    "t.dot"
                ]
            }
        ], 
        "created": "2018-02-12T22:19:58"
    }, 
    {
        "ID": "WebQTest-1560_3f9e3373173bba6e70a26c4df64aa943", 
        "webqsp_ID": "WebQTest-1560", 
        "webqsp_question": "who founded new york university", 
        "machine_question": "who founded new york university and held his govermental position from 1795-03-04", 
        "question": "Who founded New York University that had his government position form 3-4-1795?", 
        "sparql": "PREFIX ns: <http://rdf.freebase.com/ns/>\nSELECT DISTINCT ?x\nWHERE {\nFILTER (?x != ns:m.0bwfn)\nFILTER (!isLiteral(?x) OR lang(?x) = '' OR langMatches(lang(?x), 'en'))\nns:m.0bwfn ns:organization.organization.founders ?x .\n?x ns:government.politician.government_positions_held ?c .\n?c ns:government.government_position_held.from \"1795-03-04\"^^xsd:dateTime . \n}", 
        "compositionality_type": "conjunction", 
        "answers": [
            {
                "answer": "Albert Gallatin", 
                "answer_id": "m.01p369", 
                "aliases": []
            }
        ], 
        "created": "2018-02-13T05:34:06"
    }, 
    {
        "ID": "WebQTrn-158_c110cea8f379784d360ee8cbe3ab5d54", 
        "webqsp_ID": "WebQTrn-158", 
        "webqsp_question": "what cities does ryanair fly to", 
        "machine_question": "what cities does ryanair fly to and is the city that hosted 1952 Winter Olympics", 
        "question": "What city that hosted the 1952 Winter Olympics does Ryanair fly to?", 
        "sparql": "PREFIX ns: <http://rdf.freebase.com/ns/>\nSELECT DISTINCT ?x\nWHERE {\nFILTER (?x != ns:m.01m_zd)\nFILTER (!isLiteral(?x) OR lang(?x) = '' OR langMatches(lang(?x), 'en'))\nns:m.01m_zd ns:aviation.airline.airports_served ?y .\n?y ns:aviation.airline_airport_presence.cities_served ?x .\n?x ns:olympics.olympic_host_city.olympics_hosted ns:m.0124ld . \n}", 
        "compositionality_type": "conjunction", 
        "answers": [
            {
                "answer": "Oslo", 
                "answer_id": "m.05l64", 
                "aliases": [
                    "Oslo Fylke", 
                    "Oslo kommune", 
                    "Kristiania"
                ]
            }
        ], 
        "created": "2018-02-12T19:53:00"
    }, 
    {
        "ID": "WebQTest-680_fc2a807112f9623de1c5dd4185e7bd87", 
        "webqsp_ID": "WebQTest-680", 
        "webqsp_question": "what team did aguero play for", 
        "machine_question": "what team did aguero play for and is the team won the 1978 FIFA World Cup championship", 
        "question": "Which football club that claimed the 1978 FIFA World Cup Championship had Aguero as one of its players?", 
        "sparql": "PREFIX ns: <http://rdf.freebase.com/ns/>\nSELECT DISTINCT ?x\nWHERE {\nFILTER (?x != ns:m.099vgz)\nFILTER (!isLiteral(?x) OR lang(?x) = '' OR langMatches(lang(?x), 'en'))\nns:m.099vgz ns:sports.pro_athlete.teams ?y .\n?y ns:sports.sports_team_roster.team ?x .\n?x ns:sports.sports_team.championships ns:m.014nlh . \n}", 
        "compositionality_type": "conjunction", 
        "answers": [
            {
                "answer": "Argentina national football team", 
                "answer_id": "m.02bh_v", 
                "aliases": [
                    "Argentina Mens Soccer Team", 
                    "Argentina Men's National Football Team", 
                    "Argentina Mens Football Team", 
                    "La Albiceleste", 
                    "Argentina Soccer Team", 
                    "Argentina Men's National Soccer Team", 
                    "Argentina national football", 
                    "Albicelestes", 
                    "La Selecci\u00f3n", 
                    "Argentina National Football Team", 
                    "Argentina Football Team", 
                    "Argentina Men's Football Team", 
                    "Argentina Mens National Soccer Team", 
                    "Argentina National Soccer Team", 
                    "Argentina Men's Soccer Team", 
                    "Argentina Mens National Football Team"
                ]
            }
        ], 
        "created": "2018-02-13T03:58:59"
    }, 
    {
        "ID": "WebQTrn-1556_60fc62850ac70b4e2d031b82ac1400fe", 
        "webqsp_ID": "WebQTrn-1556", 
        "webqsp_question": "where did martin luther king went to school", 
        "machine_question": "where did martin luther king went to school and is the educational institution with the mascot Maroon Tiger", 
        "question": "At what educational institution with the mascot Maroon Tiger did Martin Luther King receive an education?", 
        "sparql": "PREFIX ns: <http://rdf.freebase.com/ns/>\nSELECT DISTINCT ?x\nWHERE {\nFILTER (?x != ns:m.051cc)\nFILTER (!isLiteral(?x) OR lang(?x) = '' OR langMatches(lang(?x), 'en'))\nns:m.051cc ns:people.person.education ?y .\n?y ns:education.education.institution ?x .\n?x ns:education.educational_institution.mascot ns:m.0h794d4 . \n}", 
        "compositionality_type": "conjunction", 
        "answers": [
            {
                "answer": "Morehouse College", 
                "answer_id": "m.01_r9k", 
                "aliases": [
                    "Morehouse", 
                    "Morehouse College, Atlanta", 
                    "Morehouse College, main campus"
                ]
            }
        ], 
        "created": "2018-02-12T22:31:32"
    }, 
    {
        "ID": "WebQTest-2028_c78405f6f2157645f1098f8a871f1bc2", 
        "webqsp_ID": "WebQTest-2028", 
        "webqsp_question": "who is the current leader of france 2010", 
        "machine_question": "who is the current leader of the location that appointed Louis-Eug\u00c3\u00a8ne Cavaignac to govermental position 2010", 
        "question": "The location that appointed Louis-Eug\u00c3\u00a8ne Cavaignac to governmental position in 2010, has what current leader?", 
        "sparql": "PREFIX ns: <http://rdf.freebase.com/ns/>\nSELECT DISTINCT ?x\nWHERE {\nFILTER (?x != ?c)\nFILTER (!isLiteral(?x) OR lang(?x) = '' OR langMatches(lang(?x), 'en'))\n?c ns:government.governmental_jurisdiction.governing_officials ?k .\n?k ns:government.government_position_held.appointed_by ns:m.01dsxn . \n?c ns:government.governmental_jurisdiction.governing_officials ?y .\n?y ns:government.government_position_held.office_holder ?x .\n?y ns:government.government_position_held.basic_title ns:m.060c4 .\nFILTER(NOT EXISTS {?y ns:government.government_position_held.from ?sk0} || \nEXISTS {?y ns:government.government_position_held.from ?sk1 . \nFILTER(xsd:datetime(?sk1) <= \"2010-12-31\"^^xsd:dateTime) })\nFILTER(NOT EXISTS {?y ns:government.government_position_held.to ?sk2} || \nEXISTS {?y ns:government.government_position_held.to ?sk3 . \nFILTER(xsd:datetime(?sk3) >= \"2010-01-01\"^^xsd:dateTime) })\n}\n", 
        "compositionality_type": "composition", 
        "answers": [
            {
                "answer": "Nicolas Sarkozy", 
                "answer_id": "m.02ps9k", 
                "aliases": [
                    "Hyperpresident", 
                    "The Bling Bling President", 
                    "Sarko", 
                    "Nicolas Paul St\u00e9phane Sark\u00f6zy de Nagy-Bocsa", 
                    "Speedy", 
                    "Sarko l'Am\u00e9ricain"
                ]
            }
        ], 
        "created": "2018-02-13T06:30:35"
    }, 
    {
        "ID": "WebQTest-1758_cb8a9150378789b42fe6321c28e84b3b", 
        "webqsp_ID": "WebQTest-1758", 
        "webqsp_question": "where do they speak afrikaans", 
        "machine_question": "where do they speak afrikaans and the location time zone is West Africa Time Zone", 
        "question": "Where is Afrikaans spoken in the West Africa Time Zone?", 
        "sparql": "PREFIX ns: <http://rdf.freebase.com/ns/>\nSELECT DISTINCT ?x\nWHERE {\nFILTER (?x != ns:m.0x82)\nFILTER (!isLiteral(?x) OR lang(?x) = '' OR langMatches(lang(?x), 'en'))\nns:m.0x82 ns:language.human_language.countries_spoken_in ?x .\n?x ns:location.location.time_zones ns:m.0gsrsm . \n}", 
        "compositionality_type": "conjunction", 
        "answers": [
            {
                "answer": "Namibia", 
                "answer_id": "m.05bmq", 
                "aliases": []
            }
        ], 
        "created": "2018-02-13T05:55:16"
    }, 
    {
        "ID": "WebQTest-1501_9e5afb3d15099a1354f9df60428e1f91", 
        "webqsp_ID": "WebQTest-1501", 
        "webqsp_question": "where is the un based", 
        "machine_question": "where is the the child organization is United Nations Security Council based", 
        "question": "Where is the headquarters of the United Nations Security Council?", 
        "sparql": "PREFIX ns: <http://rdf.freebase.com/ns/>\nSELECT DISTINCT ?x\nWHERE {\nFILTER (?x != ?c)\nFILTER (!isLiteral(?x) OR lang(?x) = '' OR langMatches(lang(?x), 'en'))\n?c ns:organization.organization.child ?k .\n?k ns:organization.organization_relationship.child ns:m.07vnr . \n?c ns:organization.organization.headquarters ?y .\n?y ns:location.mailing_address.citytown ?x .\n}\n", 
        "compositionality_type": "composition", 
        "answers": [
            {
                "answer": "New York City", 
                "answer_id": "m.02_286", 
                "aliases": [
                    "The City that Never Sleeps", 
                    "New York, U.S.A.", 
                    "/m/02_286", 
                    "New Yrok City", 
                    "New York City, New York, USA", 
                    "Empire City", 
                    "City of New York", 
                    "New York City, New York", 
                    "New-York", 
                    "\u30cb\u30e5\u30fc\u30e8\u30fc\u30af\u5e02", 
                    "Gotham", 
                    "New York", 
                    "New York, NY", 
                    "The Melting Pot", 
                    "Richmond County / New York city", 
                    "NYC", 
                    "The Big Apple", 
                    "New York, N.Y.", 
                    "New York, New York", 
                    "The Capital of the World"
                ]
            }
        ], 
        "created": "2018-02-13T05:28:41"
    }, 
    {
        "ID": "WebQTrn-2584_6050f9741fc20724152eafe912e420e2", 
        "webqsp_ID": "WebQTrn-2584", 
        "webqsp_question": "what currency in dominican republic should i bring", 
        "machine_question": "what currency in the currency used in the country is Dominican peso should i bring", 
        "question": "What type of currency should I bring to the Dominican?", 
        "sparql": "PREFIX ns: <http://rdf.freebase.com/ns/>\nSELECT DISTINCT ?x\nWHERE {\nFILTER (?x != ?c)\nFILTER (!isLiteral(?x) OR lang(?x) = '' OR langMatches(lang(?x), 'en'))\n?c ns:location.country.currency_used ns:m.04lt7_ . \n?c ns:location.country.currency_used ?x .\n}\n", 
        "compositionality_type": "composition", 
        "answers": [
            {
                "answer": "Dominican peso", 
                "answer_id": "m.04lt7_", 
                "aliases": []
            }
        ], 
        "created": "2018-02-13T00:14:32"
    }, 
    {
        "ID": "WebQTrn-836_7c9253b843680f5db5a4e5f5e1055f88", 
        "webqsp_ID": "WebQTrn-836", 
        "webqsp_question": "what are the major religions in uk", 
        "machine_question": "what are the major religions in uk and the religion text is Shulchan Aruch", 
        "question": "What major religion in the UK has a religious text named Shulchan Aruch?", 
        "sparql": "PREFIX ns: <http://rdf.freebase.com/ns/>\nSELECT DISTINCT ?x\nWHERE {\nFILTER (?x != ns:m.07ssc)\nFILTER (!isLiteral(?x) OR lang(?x) = '' OR langMatches(lang(?x), 'en'))\nns:m.07ssc ns:location.statistical_region.religions ?y .\n?y ns:location.religion_percentage.religion ?x .\n?x ns:religion.religion.texts ns:m.0134k1 . \n}", 
        "compositionality_type": "conjunction", 
        "answers": [
            {
                "answer": "Judaism", 
                "answer_id": "m.03_gx", 
                "aliases": [
                    "Jewish"
                ]
            }
        ], 
        "created": "2018-02-12T21:07:43"
    }, 
    {
        "ID": "WebQTrn-1592_54ddc1bbeee3c68bbfade7f9711ac04f", 
        "webqsp_ID": "WebQTrn-1592", 
        "webqsp_question": "what countries does armenia border", 
        "machine_question": "what countries does the country that has the national anthem Mer Hayrenik border", 
        "question": "What are bordering countries to the country with national anthem Mer Hayrenik?", 
        "sparql": "PREFIX ns: <http://rdf.freebase.com/ns/>\nSELECT DISTINCT ?x\nWHERE {\nFILTER (?x != ?c)\nFILTER (!isLiteral(?x) OR lang(?x) = '' OR langMatches(lang(?x), 'en'))\n?c ns:location.country.national_anthem ?k .\n?k ns:government.national_anthem_of_a_country.anthem ns:m.01l570 . \n?c ns:location.location.adjoin_s ?y .\n?y ns:location.adjoining_relationship.adjoins ?x .\n?x ns:base.biblioness.bibs_location.loc_type ?sk0 .\nFILTER (str(?sk0) = \"Country\")\n}\n", 
        "compositionality_type": "composition", 
        "answers": [
            {
                "answer": "Turkey", 
                "answer_id": "m.01znc_", 
                "aliases": [
                    "Republic of Turkey", 
                    "T\u00fcrkiye", 
                    "Turkiye"
                ]
            }, 
            {
                "answer": "Georgia", 
                "answer_id": "m.0d0kn", 
                "aliases": [
                    "Republic of Georgia"
                ]
            }, 
            {
                "answer": "Azerbaijan", 
                "answer_id": "m.0jhd", 
                "aliases": [
                    "Republic of Azerbaijan", 
                    "Az\u0259rbaycan Respublikas\u0131"
                ]
            }
        ], 
        "created": "2018-02-12T22:34:28"
    }, 
    {
        "ID": "WebQTrn-2383_1e29c3c840bb9786a905b154556836eb", 
        "webqsp_ID": "WebQTrn-2383", 
        "webqsp_question": "what team did deion sanders play for in baseball", 
        "machine_question": "what team did deion sanders play for in baseball and is the team won the 1975 World Series championship", 
        "question": "What team that won the 1975 World Series championship did Deion Sanders play baseball for?", 
        "sparql": "PREFIX ns: <http://rdf.freebase.com/ns/>\nSELECT DISTINCT ?x\nWHERE {\nFILTER (?x != ns:m.03n69x)\nFILTER (!isLiteral(?x) OR lang(?x) = '' OR langMatches(lang(?x), 'en'))\nns:m.03n69x ns:sports.pro_athlete.teams ?y .\n?y ns:sports.sports_team_roster.team ?x .\n?x ns:sports.sports_team.sport ns:m.018jz .\n?x ns:sports.sports_team.championships ns:m.022_cp . \n}", 
        "compositionality_type": "conjunction", 
        "answers": [
            {
                "answer": "Cincinnati Reds", 
                "answer_id": "m.01ypc", 
                "aliases": [
                    "Cincinnati Red Stockings"
                ]
            }
        ], 
        "created": "2018-02-12T23:51:03"
    }, 
    {
        "ID": "WebQTrn-1693_c599701ac34eba11ad67a49b133ae903", 
        "webqsp_ID": "WebQTrn-1693", 
        "webqsp_question": "who is the head coach of the new orleans saints", 
        "machine_question": "who is the head coach of the the sports team owner is Rita Benson LeBlanc", 
        "question": "Rita Benson LeBlanc is owner of the sports team with who as head coach?", 
        "sparql": "PREFIX ns: <http://rdf.freebase.com/ns/>\nSELECT DISTINCT ?x\nWHERE {\nFILTER (?x != ?c)\nFILTER (!isLiteral(?x) OR lang(?x) = '' OR langMatches(lang(?x), 'en'))\n?c ns:sports.professional_sports_team.owner_s ns:m.04173y6 . \n?c ns:american_football.football_team.current_head_coach ?x .\n}\n", 
        "compositionality_type": "composition", 
        "answers": [
            {
                "answer": "Sean Payton", 
                "answer_id": "m.09z95c", 
                "aliases": [
                    "Patrick Sean Payton"
                ]
            }
        ], 
        "created": "2018-02-12T22:43:07"
    }, 
    {
        "ID": "WebQTrn-2745_ffcdbd72aca9f8b382c653c3285bf954", 
        "webqsp_ID": "WebQTrn-2745", 
        "webqsp_question": "what is illinois state flower called", 
        "machine_question": "what is the location that appointed Jim Edgar to govermental position state flower called", 
        "question": "What is the state flower of the place that have Jim Edgar as its government official?", 
        "sparql": "PREFIX ns: <http://rdf.freebase.com/ns/>\nSELECT DISTINCT ?x\nWHERE {\nFILTER (?x != ?c)\nFILTER (!isLiteral(?x) OR lang(?x) = '' OR langMatches(lang(?x), 'en'))\n?c ns:government.governmental_jurisdiction.governing_officials ?k .\n?k ns:government.government_position_held.appointed_by ns:m.031t9z . \n?c ns:government.governmental_jurisdiction.official_symbols ?y .\n?y ns:location.location_symbol_relationship.symbol ?x .\n?y ns:location.location_symbol_relationship.Kind_of_symbol ns:m.04627gn .\n}\n", 
        "compositionality_type": "composition", 
        "answers": [
            {
                "answer": "Viola", 
                "answer_id": "m.014sg5", 
                "aliases": []
            }
        ], 
        "created": "2018-02-13T00:34:56"
    }, 
    {
        "ID": "WebQTrn-2284_3c745a757f87b0cdbc3124380680a737", 
        "webqsp_ID": "WebQTrn-2284", 
        "webqsp_question": "which countries border lake victoria", 
        "machine_question": "which countries border lake victoria and the country capital is Dodoma", 
        "question": "What country border Lake Victoria that has the capital Dodoma?", 
        "sparql": "PREFIX ns: <http://rdf.freebase.com/ns/>\nSELECT DISTINCT ?x\nWHERE {\nFILTER (?x != ns:m.0jmt7)\nFILTER (!isLiteral(?x) OR lang(?x) = '' OR langMatches(lang(?x), 'en'))\nns:m.0jmt7 ns:location.location.adjoin_s ?y .\n?y ns:location.adjoining_relationship.adjoins ?x .\n?x ns:common.topic.notable_types ns:m.01mp .\n?x ns:location.country.capital ns:m.0fnbn . \n}", 
        "compositionality_type": "conjunction", 
        "answers": [
            {
                "answer": "Tanzania", 
                "answer_id": "m.07dzf", 
                "aliases": [
                    "Jamhuri ya Muungano wa Tanzania", 
                    "United Republic of Tanzania"
                ]
            }
        ], 
        "created": "2018-02-12T23:42:23"
    }, 
    {
        "ID": "WebQTrn-3624_a57b74cb687c30b8633b88a878f8c579", 
        "webqsp_ID": "WebQTrn-3624", 
        "webqsp_question": "where did will smith go to high school", 
        "machine_question": "where did the person who once lived in Star Island go to high school", 
        "question": "Where did the person who lived in Star Island go to High School?", 
        "sparql": "PREFIX ns: <http://rdf.freebase.com/ns/>\nSELECT DISTINCT ?x\nWHERE {\nFILTER (?x != ?c)\nFILTER (!isLiteral(?x) OR lang(?x) = '' OR langMatches(lang(?x), 'en'))\n?c ns:people.person.places_lived ?k .\n?k ns:people.place_lived.location ns:m.027zsk4 . \n?c ns:people.person.education ?y .\n?y ns:education.education.institution ?x .\n?x ns:education.educational_institution.school_type ns:m.0bpgx .\n}\n", 
        "compositionality_type": "composition", 
        "answers": [
            {
                "answer": "Overbrook High School", 
                "answer_id": "m.05bk47", 
                "aliases": [
                    "Overbrook High School, Philadelphia", 
                    "Overbrook High School, main campus", 
                    "Overbrook High"
                ]
            }
        ], 
        "created": "2018-02-13T02:16:41"
    }, 
    {
        "ID": "WebQTrn-3295_865f41d7183b1e849c1f51a2857a39bd", 
        "webqsp_ID": "WebQTrn-3295", 
        "webqsp_question": "who are senators from utah", 
        "machine_question": "who are senators from utah and held his govermental position from before 1977-01-03", 
        "question": "Which senator from Utah had his position in government before 01-03-1977?", 
        "sparql": "PREFIX ns: <http://rdf.freebase.com/ns/>\nSELECT DISTINCT ?x\nWHERE {\nFILTER (?x != ns:m.07srw)\nFILTER (!isLiteral(?x) OR lang(?x) = '' OR langMatches(lang(?x), 'en'))\nns:m.07srw ns:government.political_district.representatives ?y .\n?y ns:government.government_position_held.office_holder ?x .\n?y ns:government.government_position_held.office_position_or_title ns:m.02_7l8y .\n?x ns:government.politician.government_positions_held ?c .\n?c ns:government.government_position_held.from ?num .\nFILTER (?num < \"1977-01-03\"^^xsd:dateTime) . \n}", 
        "compositionality_type": "comparative", 
        "answers": [
            {
                "answer": "Frank Moss", 
                "answer_id": "m.01zqc4", 
                "aliases": []
            }
        ], 
        "created": "2018-02-13T01:35:36"
    }, 
    {
        "ID": "WebQTrn-1008_3dc4d094915cc69911e4edefe742a167", 
        "webqsp_ID": "WebQTrn-1008", 
        "webqsp_question": "what important office did abraham lincoln hold", 
        "machine_question": "what important office did abraham lincoln hold and is the office position was held from 1790-03-19", 
        "question": "What important office position did Abraham Lincoln hold from March 19, 1790?", 
        "sparql": "PREFIX ns: <http://rdf.freebase.com/ns/>\nSELECT DISTINCT ?x\nWHERE {\nFILTER (?x != ns:m.0gzh)\nFILTER (!isLiteral(?x) OR lang(?x) = '' OR langMatches(lang(?x), 'en'))\nns:m.0gzh ns:government.politician.government_positions_held ?y .\n?y ns:government.government_position_held.office_position_or_title ?x .\n?x ns:government.government_office_or_title.office_holders ?c .\n?c ns:government.government_position_held.from \"1790-03-19\"^^xsd:dateTime . \n}", 
        "compositionality_type": "conjunction", 
        "answers": [
            {
                "answer": "United States Representative", 
                "answer_id": "m.02_bcst", 
                "aliases": [
                    "U.S. Representative", 
                    "United States Congressperson", 
                    "U.S. Congressperson", 
                    "United States Congresswoman", 
                    "U.S. Congressman", 
                    "United States Congressman", 
                    "U.S. Congresswoman", 
                    "US Representative"
                ]
            }
        ], 
        "created": "2018-02-12T21:30:38"
    }, 
    {
        "ID": "WebQTrn-1743_57ef2cd9af4559f3fbd61f9985431ebe", 
        "webqsp_ID": "WebQTrn-1743", 
        "webqsp_question": "who is the current leader of cuba today", 
        "machine_question": "who is the current leader of the country that contains Isla de la Juventud today", 
        "question": "Who is the current leader of the country that has Isla de la Jeventud?", 
        "sparql": "PREFIX ns: <http://rdf.freebase.com/ns/>\nSELECT DISTINCT ?x\nWHERE {\nFILTER (?x != ?c)\nFILTER (!isLiteral(?x) OR lang(?x) = '' OR langMatches(lang(?x), 'en'))\n?c ns:location.country.administrative_divisions ns:m.01rj40 . \n?c ns:government.governmental_jurisdiction.governing_officials ?y .\n?y ns:government.government_position_held.office_holder ?x .\n?y ns:government.government_position_held.basic_title ns:m.060c4 .\nFILTER(NOT EXISTS {?y ns:government.government_position_held.from ?sk0} || \nEXISTS {?y ns:government.government_position_held.from ?sk1 . \nFILTER(xsd:datetime(?sk1) <= \"2015-08-10\"^^xsd:dateTime) })\nFILTER(NOT EXISTS {?y ns:government.government_position_held.to ?sk2} || \nEXISTS {?y ns:government.government_position_held.to ?sk3 . \nFILTER(xsd:datetime(?sk3) >= \"2015-08-10\"^^xsd:dateTime) })\n}\n", 
        "compositionality_type": "composition", 
        "answers": [
            {
                "answer": "Ra\u00fal Castro", 
                "answer_id": "m.01gcjq", 
                "aliases": [
                    "Ra\u00fal Modesto Castro Ruz", 
                    "Raul Castro"
                ]
            }
        ], 
        "created": "2018-02-12T22:46:16"
    }, 
    {
        "ID": "WebQTest-851_f4440609f5cecb091bf8e86adb47be25", 
        "webqsp_ID": "WebQTest-851", 
        "webqsp_question": "what is the capital of modern day egypt", 
        "machine_question": "what is the capital of modern day the country that has the national anthem Bilady, Bilady, Bilady", 
        "question": "What is the modern day capital of the country with the national anthem Bilady, Bilady, Bilady?", 
        "sparql": "PREFIX ns: <http://rdf.freebase.com/ns/>\nSELECT DISTINCT ?x\nWHERE {\nFILTER (?x != ?c)\nFILTER (!isLiteral(?x) OR lang(?x) = '' OR langMatches(lang(?x), 'en'))\n?c ns:location.country.national_anthem ?k .\n?k ns:government.national_anthem_of_a_country.anthem ns:m.0d9nj_ . \n?c ns:location.country.capital ?x .\n}\n", 
        "compositionality_type": "composition", 
        "answers": [
            {
                "answer": "Cairo", 
                "answer_id": "m.01w2v", 
                "aliases": [
                    "Cairo, Egypt", 
                    "Capital of Egypt", 
                    "Cairo, Arab Republic of Egypt"
                ]
            }
        ], 
        "created": "2018-02-13T04:16:10"
    }, 
    {
        "ID": "WebQTest-405_8e34543457d5903dcca8bc603aeb09db", 
        "webqsp_ID": "WebQTest-405", 
        "webqsp_question": "who fought the battle of gettysburg", 
        "machine_question": "who fought the battle of gettysburg and is the architect that desinged Barnegat Lighthouse", 
        "question": "What architect desinged the Barnegat Lighthouse and also fought the Battle of Gettysburg?", 
        "sparql": "PREFIX ns: <http://rdf.freebase.com/ns/>\nSELECT DISTINCT ?x\nWHERE {\nFILTER (?x != ns:m.01jnm)\nFILTER (!isLiteral(?x) OR lang(?x) = '' OR langMatches(lang(?x), 'en'))\nns:m.01jnm ns:base.culturalevent.event.entity_involved ?x .\n?x ns:architecture.architect.structures_designed ns:m.06bhw4 . \n}", 
        "compositionality_type": "conjunction", 
        "answers": [
            {
                "answer": "George Meade", 
                "answer_id": "m.012pml", 
                "aliases": [
                    "George Gordon Meade"
                ]
            }
        ], 
        "created": "2018-02-13T03:27:24"
    }, 
    {
        "ID": "WebQTrn-1052_a725d13be16116bdc37bf5dd852e35b1", 
        "webqsp_ID": "WebQTrn-1052", 
        "webqsp_question": "where are the great pyramid of giza located", 
        "machine_question": "where are the great pyramid of giza located and the location time zone is Eastern European Time Zone", 
        "question": "What country has the Great Pyramid of Giza and is in Eastern European Time Zone?", 
        "sparql": "PREFIX ns: <http://rdf.freebase.com/ns/>\nSELECT DISTINCT ?x\nWHERE {\nFILTER (?x != ns:m.036mk)\nFILTER (!isLiteral(?x) OR lang(?x) = '' OR langMatches(lang(?x), 'en'))\nns:m.036mk ns:location.location.containedby ?x .\n?x ns:location.location.time_zones ns:m.03plfd . \n}", 
        "compositionality_type": "conjunction", 
        "answers": [
            {
                "answer": "Egypt", 
                "answer_id": "m.02k54", 
                "aliases": [
                    "Arab Republic of Egypt"
                ]
            }
        ], 
        "created": "2018-02-12T21:36:52"
    }, 
    {
        "ID": "WebQTest-1109_37535b56d83b1b96cd323962b483d9bc", 
        "webqsp_ID": "WebQTest-1109", 
        "webqsp_question": "who did tom landry play for", 
        "machine_question": "who did tom landry play for and is the team won the 1956 NFL Championship Game championship", 
        "question": "What team did Tom Landry play for that won the 1956 NFL Championship?", 
        "sparql": "PREFIX ns: <http://rdf.freebase.com/ns/>\nSELECT DISTINCT ?x\nWHERE {\nFILTER (?x != ns:m.019_p3)\nFILTER (!isLiteral(?x) OR lang(?x) = '' OR langMatches(lang(?x), 'en'))\nns:m.019_p3 ns:sports.pro_athlete.teams ?y .\n?y ns:sports.sports_team_roster.team ?x .\n?x ns:sports.sports_team.championships ns:m.027b_9r . \n}", 
        "compositionality_type": "conjunction", 
        "answers": [
            {
                "answer": "New York Giants", 
                "answer_id": "m.05gg4", 
                "aliases": [
                    "Jints", 
                    "G-Men", 
                    "Big Blue"
                ]
            }
        ], 
        "created": "2018-02-13T04:42:44"
    }, 
    {
        "ID": "WebQTest-686_f5143bad5a8206e03b01e80abb4c5e89", 
        "webqsp_ID": "WebQTest-686", 
        "webqsp_question": "when the atlanta braves won the world series", 
        "machine_question": "when the the team has a team moscot named Rally won the world series", 
        "question": "When did the team with a mascot named Rally win the world series?", 
        "sparql": "PREFIX ns: <http://rdf.freebase.com/ns/>\nSELECT DISTINCT ?x\nWHERE {\nFILTER (?x != ?c)\nFILTER (!isLiteral(?x) OR lang(?x) = '' OR langMatches(lang(?x), 'en'))\n?c ns:sports.sports_team.team_mascot ns:m.07vbfd . \n?c ns:sports.sports_team.championships ?x .\n}\n", 
        "compositionality_type": "composition", 
        "answers": [
            {
                "answer": "1995 World Series", 
                "answer_id": "m.04j712", 
                "aliases": [
                    "1995 World"
                ]
            }
        ], 
        "created": "2018-02-13T03:59:13"
    }, 
    {
        "ID": "WebQTest-1074_ac8783214291dd6266059cb275378880", 
        "webqsp_ID": "WebQTest-1074", 
        "webqsp_question": "who is lamar odom playing for this year", 
        "machine_question": "who is lamar odom playing for this year and the basket ball team head coach is Rick Carlisle", 
        "question": "What team did Lamar Odom play in that the head coach is Rich Carlisle?", 
        "sparql": "PREFIX ns: <http://rdf.freebase.com/ns/>\nSELECT DISTINCT ?x\nWHERE {\nFILTER (?x != ns:m.02_nkp)\nFILTER (!isLiteral(?x) OR lang(?x) = '' OR langMatches(lang(?x), 'en'))\nns:m.02_nkp ns:sports.pro_athlete.teams ?y .\n?y ns:sports.sports_team_roster.team ?x .\n?x ns:basketball.basketball_team.head_coach ns:m.02zxw4 . \n}", 
        "compositionality_type": "conjunction", 
        "answers": [
            {
                "answer": "Dallas Mavericks", 
                "answer_id": "m.0jmcv", 
                "aliases": [
                    "Mavs", 
                    "Mavericks"
                ]
            }
        ], 
        "created": "2018-02-13T04:37:06"
    }, 
    {
        "ID": "WebQTest-827_8562012e739a0e7aee294a26ad53e581", 
        "webqsp_ID": "WebQTest-827", 
        "webqsp_question": "what country does justin bieber come from", 
        "machine_question": "what country does the artist had a concert tour named Believe Tour come from", 
        "question": "Where did the country that had a tour named Believe Tour came from?", 
        "sparql": "PREFIX ns: <http://rdf.freebase.com/ns/>\nSELECT DISTINCT ?x\nWHERE {\nFILTER (?x != ?c)\nFILTER (!isLiteral(?x) OR lang(?x) = '' OR langMatches(lang(?x), 'en'))\n?c ns:music.artist.concert_tours ns:m.0j_3p6t . \n?c ns:people.person.nationality ?x .\n}\n", 
        "compositionality_type": "composition", 
        "answers": [
            {
                "answer": "Canada", 
                "answer_id": "m.0d060g", 
                "aliases": [
                    "Dominion of Canada", 
                    "Canuckistan"
                ]
            }
        ], 
        "created": "2018-02-13T04:12:29"
    }, 
    {
        "ID": "WebQTrn-2810_7bd6b37d01a372aa5af2a8d5ef53d827", 
        "webqsp_ID": "WebQTrn-2810", 
        "webqsp_question": "what religions are recognized in canada", 
        "machine_question": "what religions are recognized in canada and the relgion sacred site is Jerusalem", 
        "question": "What Canadian recognized religion has a sacred site named Jerusalem?", 
        "sparql": "PREFIX ns: <http://rdf.freebase.com/ns/>\nSELECT DISTINCT ?x\nWHERE {\nFILTER (?x != ns:m.0d060g)\nFILTER (!isLiteral(?x) OR lang(?x) = '' OR langMatches(lang(?x), 'en'))\nns:m.0d060g ns:location.statistical_region.religions ?y .\n?y ns:location.religion_percentage.religion ?x .\n?x ns:religion.religion.sacred_sites ns:m.0430_ . \n}", 
        "compositionality_type": "conjunction", 
        "answers": [
            {
                "answer": "Islam", 
                "answer_id": "m.0flw86", 
                "aliases": []
            }
        ], 
        "created": "2018-02-13T00:43:31"
    }, 
    {
        "ID": "WebQTrn-3470_2e5a22514a269da41a0f16afab223478", 
        "webqsp_ID": "WebQTrn-3470", 
        "webqsp_question": "what office does boehner hold", 
        "machine_question": "what office does boehner hold and is the office position was held from 1789-04-01", 
        "question": "What office was held by Boehner from April 1, 1789?", 
        "sparql": "PREFIX ns: <http://rdf.freebase.com/ns/>\nSELECT DISTINCT ?x\nWHERE {\nFILTER (?x != ns:m.039rwf)\nFILTER (!isLiteral(?x) OR lang(?x) = '' OR langMatches(lang(?x), 'en'))\nns:m.039rwf ns:government.politician.government_positions_held ?y .\n?y ns:government.government_position_held.office_position_or_title ?x .\n?x ns:government.government_office_or_title.office_holders ?c .\n?c ns:government.government_position_held.from \"1789-04-01\"^^xsd:dateTime . \n}", 
        "compositionality_type": "conjunction", 
        "answers": [
            {
                "answer": "Speaker of the United States House of Representatives", 
                "answer_id": "m.0cgqx", 
                "aliases": []
            }
        ], 
        "created": "2018-02-13T02:00:41"
    }, 
    {
        "ID": "WebQTrn-833_c4a4d1b444e9f0b28e960a3c1f7717ac", 
        "webqsp_ID": "WebQTrn-833", 
        "webqsp_question": "what kind of language do they speak in china", 
        "machine_question": "what kind of language do they speak in the location that appointed National People's Congress to govermental position", 
        "question": "What is the spoken language in the country that appointed National People's Congress?", 
        "sparql": "PREFIX ns: <http://rdf.freebase.com/ns/>\nSELECT DISTINCT ?x\nWHERE {\nFILTER (?x != ?c)\nFILTER (!isLiteral(?x) OR lang(?x) = '' OR langMatches(lang(?x), 'en'))\n?c ns:government.governmental_jurisdiction.governing_officials ?k .\n?k ns:government.government_position_held.appointed_by ns:m.0c3xm . \n?c ns:location.country.official_language ?x .\n}\n", 
        "compositionality_type": "composition", 
        "answers": [
            {
                "answer": "Standard Chinese", 
                "answer_id": "m.0653m", 
                "aliases": [
                    "Mandarin Chinese", 
                    "Beifang Fangyan", 
                    "Standard Chinese", 
                    "Putonghua", 
                    "Northern Chinese", 
                    "Guoyu", 
                    "Hui", 
                    "Guanhua", 
                    "Hytad", 
                    "Kuoyu", 
                    "Huayu", 
                    "Hanyu", 
                    "Chinese, Mandarin", 
                    "Qotong", 
                    "Mandarin", 
                    "Chinese, Mandarin Language", 
                    "Standard Mandarin", 
                    "Xui", 
                    "Hui-zu", 
                    "Hoton"
                ]
            }
        ], 
        "created": "2018-02-12T21:06:42"
    }, 
    {
        "ID": "WebQTest-865_889961d7542626185416881fd3e4df06", 
        "webqsp_ID": "WebQTest-865", 
        "webqsp_question": "what to do for fun in houston", 
        "machine_question": "what to do for fun in houston and is the zoo that opened on after 1922-09", 
        "question": "What zoo is fun to see in Houson that opened September 1922?", 
        "sparql": "PREFIX ns: <http://rdf.freebase.com/ns/>\nSELECT DISTINCT ?x\nWHERE {\nFILTER (?x != ns:m.03l2n)\nFILTER (!isLiteral(?x) OR lang(?x) = '' OR langMatches(lang(?x), 'en'))\nns:m.03l2n ns:travel.travel_destination.tourist_attractions ?x .\n?x ns:zoos.zoo.opened ?num .\nFILTER (?num > \"1922-09\"^^xsd:dateTime) . \n}", 
        "compositionality_type": "comparative", 
        "answers": [
            {
                "answer": "Downtown Aquarium, Houston", 
                "answer_id": "m.0cc7kjq", 
                "aliases": []
            }
        ], 
        "created": "2018-02-13T04:18:24"
    }, 
    {
        "ID": "WebQTrn-1169_0753305b6315024a258c68bac20ed6bf", 
        "webqsp_ID": "WebQTrn-1169", 
        "webqsp_question": "where is the country of panama located", 
        "machine_question": "where is the the country that has the national anthem Himno Istme\u00c3\u00b1o located", 
        "question": "On which continent is the nation whose national anthem is known as Himno Istmeno located?", 
        "sparql": "PREFIX ns: <http://rdf.freebase.com/ns/>\nSELECT DISTINCT ?x\nWHERE {\nFILTER (?x != ?c)\nFILTER (!isLiteral(?x) OR lang(?x) = '' OR langMatches(lang(?x), 'en'))\n?c ns:location.country.national_anthem ?k .\n?k ns:government.national_anthem_of_a_country.anthem ns:m.01_ryw . \n?c ns:base.locations.countries.continent ?x .\n}\n", 
        "compositionality_type": "composition", 
        "answers": [
            {
                "answer": "North America", 
                "answer_id": "m.059g4", 
                "aliases": []
            }
        ], 
        "created": "2018-02-12T21:50:07"
    }, 
    {
        "ID": "WebQTrn-1682_122beaa688f2a663adbf0b934db3d1d2", 
        "webqsp_ID": "WebQTrn-1682", 
        "webqsp_question": "when did aldi originate", 
        "machine_question": "when did the organiztion leadership has a person named Marc Heu\u00c3\u009finger originate", 
        "question": "Marc Heu\u00c3\u009finger is a person in the organization which originated when?", 
        "sparql": "PREFIX ns: <http://rdf.freebase.com/ns/>\nSELECT DISTINCT ?x\nWHERE {\nFILTER (?x != ?c)\nFILTER (!isLiteral(?x) OR lang(?x) = '' OR langMatches(lang(?x), 'en'))\n?c ns:organization.organization.leadership ?k .\n?k ns:organization.leadership.person ns:m.0w2v70z . \n?c ns:organization.organization.place_founded ?x .\n}\n", 
        "compositionality_type": "composition", 
        "answers": [
            {
                "answer": "Essen", 
                "answer_id": "m.017gry", 
                "aliases": [
                    "Essen, Germany"
                ]
            }
        ], 
        "created": "2018-02-12T22:42:26"
    }, 
    {
        "ID": "WebQTrn-3659_d1400a8da06e72c4a0286912969505d6", 
        "webqsp_ID": "WebQTrn-3659", 
        "webqsp_question": "where does the uk import from", 
        "machine_question": "where does the uk import from and is the location that appointed Reform Government of New Zealand to govermental position", 
        "question": "Where does UK import from that appointed the Return Government of New Zealand to a governmental position?", 
        "sparql": "PREFIX ns: <http://rdf.freebase.com/ns/>\nSELECT DISTINCT ?x\nWHERE {\nFILTER (?x != ns:m.07ssc)\nFILTER (!isLiteral(?x) OR lang(?x) = '' OR langMatches(lang(?x), 'en'))\nns:m.07ssc ns:location.statistical_region.places_imported_from ?y .\n?y ns:location.imports_and_exports.imported_from ?x .\n?x ns:government.governmental_jurisdiction.governing_officials ?c .\n?c ns:government.government_position_held.appointed_by ns:m.03c10mr . \n}", 
        "compositionality_type": "conjunction", 
        "answers": [
            {
                "answer": "New Zealand", 
                "answer_id": "m.0ctw_b", 
                "aliases": [
                    "God's own", 
                    "NZ", 
                    "Land of the long white cloud", 
                    "Aotearoa"
                ]
            }, 
            {
                "answer": "New Zealand", 
                "answer_id": "m.0ctw_b", 
                "aliases": [
                    "God's own", 
                    "NZ", 
                    "Land of the long white cloud", 
                    "Aotearoa"
                ]
            }, 
            {
                "answer": "New Zealand", 
                "answer_id": "m.0ctw_b", 
                "aliases": [
                    "God's own", 
                    "NZ", 
                    "Land of the long white cloud", 
                    "Aotearoa"
                ]
            }, 
            {
                "answer": "New Zealand", 
                "answer_id": "m.0ctw_b", 
                "aliases": [
                    "God's own", 
                    "NZ", 
                    "Land of the long white cloud", 
                    "Aotearoa"
                ]
            }
        ], 
        "created": "2018-02-13T02:19:50"
    }, 
    {
        "ID": "WebQTrn-2181_018dc0c070e53555fa37f63d4b83ca87", 
        "webqsp_ID": "WebQTrn-2181", 
        "webqsp_question": "who is the ravens coach", 
        "machine_question": "who is the the team has a team moscot named Poe coach", 
        "question": "Who is the coach of the sports team with team mascot Poe?", 
        "sparql": "PREFIX ns: <http://rdf.freebase.com/ns/>\nSELECT DISTINCT ?x\nWHERE {\nFILTER (?x != ?c)\nFILTER (!isLiteral(?x) OR lang(?x) = '' OR langMatches(lang(?x), 'en'))\n?c ns:sports.sports_team.team_mascot ns:m.052tmyg . \n?c ns:american_football.football_team.current_head_coach ?x .\n}\n", 
        "compositionality_type": "composition", 
        "answers": [
            {
                "answer": "John Harbaugh", 
                "answer_id": "m.0c2fvr", 
                "aliases": []
            }
        ], 
        "created": "2018-02-12T23:32:26"
    }, 
    {
        "ID": "WebQTrn-1656_854bfa86ed723c270e40a81425bcdf86", 
        "webqsp_ID": "WebQTrn-1656", 
        "webqsp_question": "what school did bill gates go to", 
        "machine_question": "what school did bill gates go to and the educational institution newspaper is The Harvard Crimson", 
        "question": "What school did Bill Gate go to that publishes The Harvard Crimson?", 
        "sparql": "PREFIX ns: <http://rdf.freebase.com/ns/>\nSELECT DISTINCT ?x\nWHERE {\nFILTER (?x != ns:m.017nt)\nFILTER (!isLiteral(?x) OR lang(?x) = '' OR langMatches(lang(?x), 'en'))\nns:m.017nt ns:people.person.education ?y .\n?y ns:education.education.institution ?x .\n?x ns:education.educational_institution.newspaper ns:m.01s1g7 . \n}", 
        "compositionality_type": "conjunction", 
        "answers": [
            {
                "answer": "Harvard College", 
                "answer_id": "m.01mpwj", 
                "aliases": [
                    "Harvard", 
                    "Harvard College, main campus", 
                    "Harvard College, Cambridge"
                ]
            }
        ], 
        "created": "2018-02-12T22:40:20"
    }, 
    {
        "ID": "WebQTrn-2145_52b480cbb523b1939ebd36fa9c246c9a", 
        "webqsp_ID": "WebQTrn-2145", 
        "webqsp_question": "what year did edgar allan poe go to college", 
        "machine_question": "what year did edgar allan poe go to college and is the educational institution with the mascot Army Mules", 
        "question": "What college attended by Edgar Allen Poe with Army Mule as its mascot?", 
        "sparql": "PREFIX ns: <http://rdf.freebase.com/ns/>\nSELECT DISTINCT ?x\nWHERE {\nFILTER (?x != ns:m.02lt8)\nFILTER (!isLiteral(?x) OR lang(?x) = '' OR langMatches(lang(?x), 'en'))\nns:m.02lt8 ns:people.person.education ?y .\n?y ns:education.education.institution ?x .\n?x ns:common.topic.notable_types ns:m.01y2hnl .\n?x ns:education.educational_institution.mascot ns:m.0gqbxd . \n}", 
        "compositionality_type": "conjunction", 
        "answers": [
            {
                "answer": "United States Military Academy", 
                "answer_id": "m.07x4c", 
                "aliases": [
                    "West Point", 
                    "Army", 
                    "U.S. Military Academy", 
                    "United States Military Academy, main campus", 
                    "United States Military Academy, West Point", 
                    "USMA Staff"
                ]
            }
        ], 
        "created": "2018-02-12T23:28:37"
    }, 
    {
        "ID": "WebQTest-670_f4440609f5cecb091bf8e86adb47be25", 
        "webqsp_ID": "WebQTest-670", 
        "webqsp_question": "what kind of language does egypt speak", 
        "machine_question": "what kind of language does the country that has the national anthem Bilady, Bilady, Bilady speak", 
        "question": "What language is used in the country that has national anthem Bilady Bilady, Bilady?", 
        "sparql": "PREFIX ns: <http://rdf.freebase.com/ns/>\nSELECT DISTINCT ?x\nWHERE {\nFILTER (?x != ?c)\nFILTER (!isLiteral(?x) OR lang(?x) = '' OR langMatches(lang(?x), 'en'))\n?c ns:location.country.national_anthem ?k .\n?k ns:government.national_anthem_of_a_country.anthem ns:m.0d9nj_ . \n?c ns:location.country.official_language ?x .\n}\n", 
        "compositionality_type": "composition", 
        "answers": [
            {
                "answer": "Modern Standard Arabic", 
                "answer_id": "m.025rvv7", 
                "aliases": [
                    "High Arabic", 
                    "Fasih", 
                    "Modern Literary Arabic", 
                    "Arabic, Standard", 
                    "Al Arabiya", 
                    "Al Fus-ha"
                ]
            }
        ], 
        "created": "2018-02-13T03:58:35"
    }, 
    {
        "ID": "WebQTest-388_c4a7c8067a237e9818e6386d79aec7f0", 
        "webqsp_ID": "WebQTest-388", 
        "webqsp_question": "what are the important holidays of islam", 
        "machine_question": "what are the important holidays of the religion place of worship is Islamic Society of Western Maryland", 
        "question": "Which religion holidays is observed by the worshippers at the Islamic Society of Western Maryland?", 
        "sparql": "PREFIX ns: <http://rdf.freebase.com/ns/>\nSELECT DISTINCT ?x\nWHERE {\nFILTER (?x != ?c)\nFILTER (!isLiteral(?x) OR lang(?x) = '' OR langMatches(lang(?x), 'en'))\n?c ns:religion.religion.places_of_worship ns:m.04f668n . \n?c ns:religion.religion.holidays ?x .\n}\n", 
        "compositionality_type": "composition", 
        "answers": [
            {
                "answer": "Eid al-Fitr Eve", 
                "answer_id": "m.0_tkhhs", 
                "aliases": []
            }, 
            {
                "answer": "Eid-Ul-Adha Eve", 
                "answer_id": "m.0_tkryk", 
                "aliases": []
            }, 
            {
                "answer": "Eid al-Adha", 
                "answer_id": "m.01_403", 
                "aliases": [
                    "bakra eid", 
                    "Greater Eid", 
                    "eid al adha", 
                    "bakr-id", 
                    "Eid ul-adha", 
                    "id eladha", 
                    "3ed el adha", 
                    "eid aladha", 
                    "Eid-al-adha", 
                    "Id el adha", 
                    "3eed el adha", 
                    "id uladha", 
                    "3id el adha", 
                    "The Festival of Sacrifice", 
                    "Kurban Bayram\u0131", 
                    "3eed eladha", 
                    "eid el adha", 
                    "3ed eladha", 
                    "3ed elad7a", 
                    "3eed elad7a", 
                    "eid adha", 
                    "Sacrifice Feast", 
                    "3eed el ad7a", 
                    "3id elad7a", 
                    "3ed el ad7a", 
                    "eid ul adha", 
                    "Feast of Sacrifice", 
                    "eid eladha", 
                    "id aladha", 
                    "Festival of Sacrifice", 
                    "id al adha", 
                    "3id eladha", 
                    "3id el ad7a", 
                    "Id-ul-adha", 
                    "Id al-adha", 
                    "id ul adha", 
                    "eid uladha", 
                    "bakrid", 
                    "bakrid eid", 
                    "Eid el-adha"
                ]
            }, 
            {
                "answer": "Lailat al Mi'raj", 
                "answer_id": "m.0114y4k_", 
                "aliases": []
            }, 
            {
                "answer": "Nuzul Al-Quran", 
                "answer_id": "m.011njw8h", 
                "aliases": []
            }, 
            {
                "answer": "Eid al-Fitr", 
                "answer_id": "m.0148n3", 
                "aliases": [
                    "3ed elfitr", 
                    "eid alfitr", 
                    "3ed el fitr", 
                    "3id elfiter", 
                    "3id elfitr", 
                    "eid ul fitr", 
                    "id elfitr", 
                    "id al fiter", 
                    "eid al fitr", 
                    "id ul fiter", 
                    "eid ulfiter", 
                    "id alfitr", 
                    "3eed el fiter", 
                    "3eed elfitr", 
                    "id elfiter", 
                    "eid ulfitr", 
                    "Eid-al-Fitr", 
                    "eid al fiter", 
                    "Id al-Fitr", 
                    "eid fitr", 
                    "Id-ul-Fitr", 
                    "id alfiter", 
                    "id el fiter", 
                    "eid elfiter", 
                    "3eed elfiter", 
                    "3id el fitr", 
                    "id ulfiter", 
                    "Eid ul-Fitr", 
                    "eid el fitr", 
                    "3id el fiter", 
                    "3ed el fiter", 
                    "eid alfiter", 
                    "\u012adu l-Fi\u1e6dr", 
                    "eid ul fiter", 
                    "3ed elfiter", 
                    "3eed el fitr", 
                    "eid", 
                    "Hari Raya Aidilfitri", 
                    "eid el fiter", 
                    "id ulfitr"
                ]
            }, 
            {
                "answer": "Day of Arafat", 
                "answer_id": "m.027cs49", 
                "aliases": [
                    "Day of Arafa", 
                    "Arafa day", 
                    "Arafat day"
                ]
            }, 
            {
                "answer": "Day of Ashura", 
                "answer_id": "m.02gk03", 
                "aliases": []
            }, 
            {
                "answer": "Mourning of Muharram", 
                "answer_id": "m.03clhwf", 
                "aliases": []
            }, 
            {
                "answer": "Laylat al-Qadr", 
                "answer_id": "m.04b4l4", 
                "aliases": [
                    "Shab-e-Qadr"
                ]
            }, 
            {
                "answer": "Barat Night", 
                "answer_id": "m.04jc26j", 
                "aliases": []
            }, 
            {
                "answer": "Mawlid", 
                "answer_id": "m.04q3_d", 
                "aliases": [
                    "mawlid al-nabi", 
                    "Prophet's Birthday", 
                    "m\u012bl\u0101d", 
                    "milad un-nabi", 
                    "mawlid al nabi", 
                    "mulud", 
                    "Mevlid", 
                    "Eid Milad ul-Nabi", 
                    "Milad-un-Nabi", 
                    "Mevlit"
                ]
            }, 
            {
                "answer": "Ramadan", 
                "answer_id": "m.06j8x", 
                "aliases": [
                    "Rama\u1e0d\u0101n", 
                    "ramazan"
                ]
            }, 
            {
                "answer": "Islamic New Year", 
                "answer_id": "m.07_46x", 
                "aliases": [
                    "Muslim New Year"
                ]
            }, 
            {
                "answer": "Night of Wishes", 
                "answer_id": "m.0vpsp_r", 
                "aliases": [
                    "Laylat Al-ragha'ib"
                ]
            }
        ], 
        "created": "2018-02-13T03:24:56"
    }, 
    {
        "ID": "WebQTrn-2686_197a83170baa2b9b124daf7030ad275a", 
        "webqsp_ID": "WebQTrn-2686", 
        "webqsp_question": "what type of currency is used in puerto rico", 
        "machine_question": "what type of currency is used in the country that has the national anthem La Borinque\u00c3\u00b1a", 
        "question": "What is the type of money in the country that has \"La Borinquena\" national anthem?", 
        "sparql": "PREFIX ns: <http://rdf.freebase.com/ns/>\nSELECT DISTINCT ?x\nWHERE {\nFILTER (?x != ?c)\nFILTER (!isLiteral(?x) OR lang(?x) = '' OR langMatches(lang(?x), 'en'))\n?c ns:location.country.national_anthem ?k .\n?k ns:government.national_anthem_of_a_country.anthem ns:m.014mqd . \n?c ns:location.country.currency_used ?x .\n}\n", 
        "compositionality_type": "composition", 
        "answers": [
            {
                "answer": "United States Dollar", 
                "answer_id": "m.09nqf", 
                "aliases": [
                    "USD", 
                    "$", 
                    "US Dollar", 
                    "US $", 
                    "US Currency", 
                    "US$", 
                    "Federal Reserve Note", 
                    "American Dollar", 
                    "Greenback"
                ]
            }
        ], 
        "created": "2018-02-13T00:27:03"
    }, 
    {
        "ID": "WebQTest-1119_af822f386c49e89a32d2889d16618e1c", 
        "webqsp_ID": "WebQTest-1119", 
        "webqsp_question": "what is colorado technical university", 
        "machine_question": "what is the education institution has a grad student named Terry Guthrie", 
        "question": "What type of institution has a grad student named Terry Guthrie?", 
        "sparql": "PREFIX ns: <http://rdf.freebase.com/ns/>\nSELECT DISTINCT ?x\nWHERE {\nFILTER (?x != ?c)\nFILTER (!isLiteral(?x) OR lang(?x) = '' OR langMatches(lang(?x), 'en'))\n?c ns:education.educational_institution.students_graduates ?k .\n?k ns:education.education.student ns:m.0yr7vc2 . \n?c ns:common.topic.notable_types ?x .\n}\n", 
        "compositionality_type": "composition", 
        "answers": [
            {
                "answer": "College/University", 
                "answer_id": "m.01y2hnl", 
                "aliases": [
                    "University", 
                    "College"
                ]
            }
        ], 
        "created": "2018-02-13T04:45:06"
    }, 
    {
        "ID": "WebQTrn-1603_74c5edd9a79d51772446ff4746bd318f", 
        "webqsp_ID": "WebQTrn-1603", 
        "webqsp_question": "what form of government exists in china", 
        "machine_question": "what form of government exists in the currency used in the country is Renminbi", 
        "question": "What type of government is used in the country that uses Renminbi as its currency?", 
        "sparql": "PREFIX ns: <http://rdf.freebase.com/ns/>\nSELECT DISTINCT ?x\nWHERE {\nFILTER (?x != ?c)\nFILTER (!isLiteral(?x) OR lang(?x) = '' OR langMatches(lang(?x), 'en'))\n?c ns:location.country.currency_used ns:m.0hn4_ . \n?c ns:location.country.form_of_government ?x .\n}\n", 
        "compositionality_type": "composition", 
        "answers": [
            {
                "answer": "Communist state", 
                "answer_id": "m.01fkst", 
                "aliases": [
                    "Communist"
                ]
            }, 
            {
                "answer": "Socialist state", 
                "answer_id": "m.025tbxf", 
                "aliases": [
                    "Socialist", 
                    "Socialist Republic"
                ]
            }, 
            {
                "answer": "Single-party state", 
                "answer_id": "m.0py4y", 
                "aliases": [
                    "Single-party"
                ]
            }
        ], 
        "created": "2018-02-12T22:35:25"
    }, 
    {
        "ID": "WebQTrn-300_eb564934e04a707855def98c35f9496d", 
        "webqsp_ID": "WebQTrn-300", 
        "webqsp_question": "where is the ottoman empire located", 
        "machine_question": "where is the the country that contains Sanjak of \u00c3\u009csk\u00c3\u00bcp located", 
        "question": "Where is the country that has Sanjak of \u00c3\u009csk\u00c3\u00bcp located?", 
        "sparql": "PREFIX ns: <http://rdf.freebase.com/ns/>\nSELECT DISTINCT ?x\nWHERE {\nFILTER (?x != ?c)\nFILTER (!isLiteral(?x) OR lang(?x) = '' OR langMatches(lang(?x), 'en'))\n?c ns:location.country.administrative_divisions ns:m.0gvrv8w . \n?c ns:location.location.containedby ?x .\n}\n", 
        "compositionality_type": "composition", 
        "answers": [
            {
                "answer": "Near East", 
                "answer_id": "m.01ffbn", 
                "aliases": []
            }
        ], 
        "created": "2018-02-12T20:12:09"
    }, 
    {
        "ID": "WebQTest-1735_eaa7a9f669e0d6d5caf732fd225ff411", 
        "webqsp_ID": "WebQTest-1735", 
        "webqsp_question": "where do most of the people live in russia", 
        "machine_question": "where do most of the people live in the location that appointed Vladimir Putin to govermental position", 
        "question": "Where do most people live in the country where Vladimir Putin is in a government position?", 
        "sparql": "PREFIX ns: <http://rdf.freebase.com/ns/>\nSELECT DISTINCT ?x\nWHERE {\nFILTER (?x != ?c)\nFILTER (!isLiteral(?x) OR lang(?x) = '' OR langMatches(lang(?x), 'en'))\n?c ns:government.governmental_jurisdiction.governing_officials ?k .\n?k ns:government.government_position_held.appointed_by ns:m.08193 . \n?c ns:location.location.contains ?x .\n?x ns:topic_server.population_number ?sk0 .\n}\nORDER BY DESC(xsd:float(?sk0))\nLIMIT 1\n", 
        "compositionality_type": "composition", 
        "answers": [
            {
                "answer": "Central Federal District", 
                "answer_id": "m.02wr92", 
                "aliases": []
            }
        ], 
        "created": "2018-02-13T05:51:45"
    }, 
    {
        "ID": "WebQTrn-2946_87d8a58bf466405b3ac848bfc01964b2", 
        "webqsp_ID": "WebQTrn-2946", 
        "webqsp_question": "who did tyson chandler play for", 
        "machine_question": "who did tyson chandler play for and is the team won the 2011 NBA Finals championship", 
        "question": "What team that won the 2011 NBA Finals championship did Tyson Chandler play for?", 
        "sparql": "PREFIX ns: <http://rdf.freebase.com/ns/>\nSELECT DISTINCT ?x\nWHERE {\nFILTER (?x != ns:m.05j8c8)\nFILTER (!isLiteral(?x) OR lang(?x) = '' OR langMatches(lang(?x), 'en'))\nns:m.05j8c8 ns:sports.pro_athlete.teams ?y .\n?y ns:sports.sports_team_roster.team ?x .\n?x ns:sports.sports_team.championships ns:m.0cm910t . \n}", 
        "compositionality_type": "conjunction", 
        "answers": [
            {
                "answer": "Dallas Mavericks", 
                "answer_id": "m.0jmcv", 
                "aliases": [
                    "Mavs", 
                    "Mavericks"
                ]
            }
        ], 
        "created": "2018-02-13T00:56:07"
    }, 
    {
        "ID": "WebQTrn-1870_2822bd7f4427702816742b8f6e561377", 
        "webqsp_ID": "WebQTrn-1870", 
        "webqsp_question": "who played michael myers in halloween 4", 
        "machine_question": "who played michael myers in the film has a charcter named Kelly Meeker", 
        "question": "In the film that has a charcter named Kelly Meeker, who played Michael Myers?", 
        "sparql": "PREFIX ns: <http://rdf.freebase.com/ns/>\nSELECT DISTINCT ?x\nWHERE {\nFILTER (?x != ?c)\nFILTER (!isLiteral(?x) OR lang(?x) = '' OR langMatches(lang(?x), 'en'))\n?c ns:film.film.starring ?k .\n?k ns:film.performance.character ns:m.0hqf9tr . \n?c ns:film.film.starring ?y .\n?y ns:film.performance.actor ?x .\n?y ns:film.performance.character ns:m.03zj8n .\n}\n", 
        "compositionality_type": "composition", 
        "answers": [
            {
                "answer": "George P. Wilbur", 
                "answer_id": "m.0ccvdt", 
                "aliases": [
                    "George Wilber", 
                    "George P. Wilber", 
                    "George Wilbur", 
                    "George Peter Wilbur", 
                    "J\u00f4ji Wirub\u00e2"
                ]
            }
        ], 
        "created": "2018-02-12T23:00:49"
    }, 
    {
        "ID": "WebQTrn-1572_2d45e5f27018fef8d4f5f7e2cf000006", 
        "webqsp_ID": "WebQTrn-1572", 
        "webqsp_question": "what religion did the ottoman turks follow", 
        "machine_question": "what religion did the ottoman turks follow and the religion notable figure is Marcion of Sinope", 
        "question": "What religion followed by the Ottoman Turks had notable figure Marcion of Sinope?", 
        "sparql": "PREFIX ns: <http://rdf.freebase.com/ns/>\nSELECT DISTINCT ?x\nWHERE {\nFILTER (?x != ns:m.05kyr)\nFILTER (!isLiteral(?x) OR lang(?x) = '' OR langMatches(lang(?x), 'en'))\nns:m.05kyr ns:location.statistical_region.religions ?y .\n?y ns:location.religion_percentage.religion ?x .\n?x ns:religion.religion.notable_figures ns:m.01br4j . \n}", 
        "compositionality_type": "conjunction", 
        "answers": [
            {
                "answer": "Christianity", 
                "answer_id": "m.01lp8", 
                "aliases": [
                    "Christian"
                ]
            }
        ], 
        "created": "2018-02-12T22:33:03"
    }, 
    {
        "ID": "WebQTest-1142_79a940d7a0bf5b8611a54f6ddab3b3fd", 
        "webqsp_ID": "WebQTest-1142", 
        "webqsp_question": "who does ronaldinho play for now 2011", 
        "machine_question": "who does ronaldinho play for now 2011 and is the team won the 1970 FIFA World Cup championship", 
        "question": "What team for which Ronaldinho played in 2011 was the winner of the 1970 FIFA World Cup championship?", 
        "sparql": "PREFIX ns: <http://rdf.freebase.com/ns/>\nSELECT DISTINCT ?x\nWHERE {\nFILTER (?x != ns:m.02lfw5)\nFILTER (!isLiteral(?x) OR lang(?x) = '' OR langMatches(lang(?x), 'en'))\nns:m.02lfw5 ns:sports.pro_athlete.teams ?y .\n?y ns:sports.sports_team_roster.team ?x .\nFILTER(NOT EXISTS {?y ns:sports.sports_team_roster.from ?sk0} || \nEXISTS {?y ns:sports.sports_team_roster.from ?sk1 . \nFILTER(xsd:datetime(?sk1) <= \"2011-12-31\"^^xsd:dateTime) })\nFILTER(NOT EXISTS {?y ns:sports.sports_team_roster.to ?sk2} || \nEXISTS {?y ns:sports.sports_team_roster.to ?sk3 . \nFILTER(xsd:datetime(?sk3) >= \"2011-01-01\"^^xsd:dateTime) })\n?x ns:sports.sports_team.championships ns:m.014nkh . \n}", 
        "compositionality_type": "conjunction", 
        "answers": [
            {
                "answer": "Brazil national football team", 
                "answer_id": "m.01352_", 
                "aliases": [
                    "Brazil Football Team", 
                    "Sele\u00e7\u00e3o", 
                    "Brazil Men's National Football Team", 
                    "Brazil Mens Soccer Team", 
                    "Brazil Mens National Soccer Team", 
                    "Brazil Men's Football Team", 
                    "Brazil Mens Football Team", 
                    "Brazil Men's National Soccer Team", 
                    "Brazil National Soccer Team", 
                    "Brazil Mens National Football Team", 
                    "Brazil national football", 
                    "Brazil Soccer Team", 
                    "Brazil Men's Soccer Team"
                ]
            }
        ], 
        "created": "2018-02-13T04:47:20"
    }, 
    {
        "ID": "WebQTest-856_719d113f0572295305e7945531140757", 
        "webqsp_ID": "WebQTest-856", 
        "webqsp_question": "what types of art did andy warhol do", 
        "machine_question": "what types of art did the person education major field of study is Poster Design do", 
        "question": "What forms of art are used by a person with a college major of Poster Design?", 
        "sparql": "PREFIX ns: <http://rdf.freebase.com/ns/>\nSELECT DISTINCT ?x\nWHERE {\nFILTER (?x != ?c)\nFILTER (!isLiteral(?x) OR lang(?x) = '' OR langMatches(lang(?x), 'en'))\n?c ns:people.person.education ?k .\n?k ns:education.education.major_field_of_study ns:m.0dgy0ln . \n?c ns:visual_art.visual_artist.associated_periods_or_movements ?x .\n}\n", 
        "compositionality_type": "composition", 
        "answers": [
            {
                "answer": "Modern art", 
                "answer_id": "m.015r61", 
                "aliases": []
            }, 
            {
                "answer": "Pop art", 
                "answer_id": "m.0q4mn", 
                "aliases": []
            }
        ], 
        "created": "2018-02-13T04:16:53"
    }, 
    {
        "ID": "WebQTrn-1049_96417e4d721f5c0e2c9079454df0af5b", 
        "webqsp_ID": "WebQTrn-1049", 
        "webqsp_question": "what is currency in dominican republic", 
        "machine_question": "what is currency in the country that contains El Seibo Province", 
        "question": "Which type of currency is utilized in the country that includes the location of El Seibo Province?", 
        "sparql": "PREFIX ns: <http://rdf.freebase.com/ns/>\nSELECT DISTINCT ?x\nWHERE {\nFILTER (?x != ?c)\nFILTER (!isLiteral(?x) OR lang(?x) = '' OR langMatches(lang(?x), 'en'))\n?c ns:location.country.administrative_divisions ns:m.03xplf . \n?c ns:location.country.currency_used ?x .\n}\n", 
        "compositionality_type": "composition", 
        "answers": [
            {
                "answer": "Dominican peso", 
                "answer_id": "m.04lt7_", 
                "aliases": []
            }
        ], 
        "created": "2018-02-12T21:36:49"
    }, 
    {
        "ID": "WebQTrn-2748_7712cb150914e7be807253ecc9fa6e3e", 
        "webqsp_ID": "WebQTrn-2748", 
        "webqsp_question": "what language do they speak thailand", 
        "machine_question": "what language do they speak the currency used in the country is Thai baht", 
        "question": "The people from the country with the currency used Thai Baht speak what language?", 
        "sparql": "PREFIX ns: <http://rdf.freebase.com/ns/>\nSELECT DISTINCT ?x\nWHERE {\nFILTER (?x != ?c)\nFILTER (!isLiteral(?x) OR lang(?x) = '' OR langMatches(lang(?x), 'en'))\n?c ns:location.country.currency_used ns:m.0mcb5 . \n?c ns:location.country.languages_spoken ?x .\n}\n", 
        "compositionality_type": "composition", 
        "answers": [
            {
                "answer": "Lao Language", 
                "answer_id": "m.011ln5", 
                "aliases": [
                    "L\u00e0o", 
                    "Laotian Tai", 
                    "Lao", 
                    "Lao-tai", 
                    "Lao Kao", 
                    "Lao Wiang", 
                    "Tai Lao", 
                    "Phou Lao", 
                    "Eastern Thai", 
                    "Laotian", 
                    "Lao-lum", 
                    "Lao-noi", 
                    "Rong Kong", 
                    "Lum Lao"
                ]
            }, 
            {
                "answer": "Khmer language", 
                "answer_id": "m.01lqm", 
                "aliases": [
                    "Khmer", 
                    "Kho Me", 
                    "Krom", 
                    "Khome", 
                    "Khmer, Central", 
                    "Cambodian", 
                    "Viet Go Mien", 
                    "Cu Tho", 
                    "Khmer, Central Language", 
                    "Cur Cul"
                ]
            }, 
            {
                "answer": "Akha Language", 
                "answer_id": "m.02hwgbx", 
                "aliases": [
                    "Ikaw", 
                    "Khako", 
                    "Kha Ko", 
                    "Ikor", 
                    "Ko", 
                    "Aini", 
                    "Hka Ko", 
                    "Khao Ikor", 
                    "Ekaw", 
                    "Akha", 
                    "Ak'a", 
                    "Kaw", 
                    "Aka", 
                    "Ahka", 
                    "Khao Kha Ko", 
                    "Yani"
                ]
            }, 
            {
                "answer": "Mlabri Language", 
                "answer_id": "m.02hx03r", 
                "aliases": [
                    "Mrabri", 
                    "Mla", 
                    "Ma Ku", 
                    "Mabri", 
                    "Yellow Leaf", 
                    "Mla Bri", 
                    "Mlabri", 
                    "Phi Thong Luang", 
                    "Mla-bri", 
                    "Yumbri"
                ]
            }, 
            {
                "answer": "Hmong language", 
                "answer_id": "m.04lx1w", 
                "aliases": [
                    "Hmong"
                ]
            }, 
            {
                "answer": "Saek language", 
                "answer_id": "m.052px1", 
                "aliases": [
                    "Saek", 
                    "Tai Sek", 
                    "Set", 
                    "Sek", 
                    "Saek Language"
                ]
            }, 
            {
                "answer": "Malay, Pattani Language", 
                "answer_id": "m.072f4m", 
                "aliases": [
                    "Malay, Pattani", 
                    "Thai Islam"
                ]
            }, 
            {
                "answer": "Vietnamese Language", 
                "answer_id": "m.07zrf", 
                "aliases": [
                    "Jing", 
                    "Vietnamese", 
                    "Annamese", 
                    "Kinh", 
                    "Ching", 
                    "Gin", 
                    "Viet"
                ]
            }, 
            {
                "answer": "Nyaw Language", 
                "answer_id": "m.08h4f2", 
                "aliases": [
                    "Nyaw", 
                    "Nyoh", 
                    "Jo", 
                    "Nyo", 
                    "Yo"
                ]
            }, 
            {
                "answer": "Phu Thai language", 
                "answer_id": "m.08h4l8", 
                "aliases": [
                    "Puthay", 
                    "Puthai", 
                    "Phu Thai Language", 
                    "Phuu Thai", 
                    "Phu Thai", 
                    "Phutai", 
                    "Putai"
                ]
            }, 
            {
                "answer": "Cham language", 
                "answer_id": "m.0bskhb", 
                "aliases": [
                    "Cham"
                ]
            }, 
            {
                "answer": "Mon Language", 
                "answer_id": "m.0bxn4", 
                "aliases": [
                    "Aleng", 
                    "Peguan", 
                    "Taleng", 
                    "Talaing", 
                    "Mon", 
                    "Takanoon", 
                    "Mun"
                ]
            }, 
            {
                "answer": "Thai Language", 
                "answer_id": "m.0c_v2", 
                "aliases": [
                    "Siamese", 
                    "Thaiklang", 
                    "Thai", 
                    "Standard Thai", 
                    "Central Tai"
                ]
            }
        ], 
        "created": "2018-02-13T00:35:10"
    }, 
    {
        "ID": "WebQTrn-690_6e489f71738a461b21bfaa2157e99628", 
        "webqsp_ID": "WebQTrn-690", 
        "webqsp_question": "who all has jason kidd played for", 
        "machine_question": "who all has the person education institution is St. Joseph Notre Dame High School played for", 
        "question": "What team did the famous athlete who attended St. Joseph Notre Dame High school play for?", 
        "sparql": "PREFIX ns: <http://rdf.freebase.com/ns/>\nSELECT DISTINCT ?x\nWHERE {\nFILTER (?x != ?c)\nFILTER (!isLiteral(?x) OR lang(?x) = '' OR langMatches(lang(?x), 'en'))\n?c ns:people.person.education ?k .\n?k ns:education.education.institution ns:m.0czb2k . \n?c ns:sports.pro_athlete.teams ?y .\n?y ns:sports.sports_team_roster.team ?x .\n}\n", 
        "compositionality_type": "composition", 
        "answers": [
            {
                "answer": "Brooklyn Nets", 
                "answer_id": "m.0jm3b", 
                "aliases": [
                    "New York Nets", 
                    "New Jersey Nets", 
                    "New Jersey Americans", 
                    "Nets"
                ]
            }, 
            {
                "answer": "New York Knicks", 
                "answer_id": "m.0jm3v", 
                "aliases": [
                    "Knicks"
                ]
            }, 
            {
                "answer": "Dallas Mavericks", 
                "answer_id": "m.0jmcv", 
                "aliases": [
                    "Mavs", 
                    "Mavericks"
                ]
            }, 
            {
                "answer": "Phoenix Suns", 
                "answer_id": "m.0jml5", 
                "aliases": [
                    "Suns"
                ]
            }
        ], 
        "created": "2018-02-12T20:56:28"
    }, 
    {
        "ID": "WebQTrn-3003_a42ef572567ccaf4d1a2e609d11a4226", 
        "webqsp_ID": "WebQTrn-3003", 
        "webqsp_question": "what do ethiopia import and export", 
        "machine_question": "what do the country that has the national anthem March Forward, Dear Mother Ethiopia import and export", 
        "question": "What are the primary imports and exports of the nation whose national anthem is \"March Forward, Dear Mother Ethiopia\"?", 
        "sparql": "PREFIX ns: <http://rdf.freebase.com/ns/>\nSELECT DISTINCT ?x\nWHERE {\nFILTER (?x != ?c)\nFILTER (!isLiteral(?x) OR lang(?x) = '' OR langMatches(lang(?x), 'en'))\n?c ns:location.country.national_anthem ?k .\n?k ns:government.national_anthem_of_a_country.anthem ns:m.01n8bk . \n?c ns:location.statistical_region.major_exports ?y .\n?y ns:location.imports_exports_by_industry.industry ?x .\n}\n", 
        "compositionality_type": "composition", 
        "answers": [
            {
                "answer": "Coffee and Tea Manufacturing", 
                "answer_id": "m.03q9x1t", 
                "aliases": []
            }, 
            {
                "answer": "Leather and Hide Tanning and Finishing", 
                "answer_id": "m.03q9xnr", 
                "aliases": []
            }, 
            {
                "answer": "Livestock Merchant Wholesalers", 
                "answer_id": "m.03qb65t", 
                "aliases": []
            }
        ], 
        "created": "2018-02-13T01:02:52"
    }, 
    {
        "ID": "WebQTrn-2570_c47133a5a4595621bf114ffa8ed4c3e3", 
        "webqsp_ID": "WebQTrn-2570", 
        "webqsp_question": "who was the president of the united states during ww2", 
        "machine_question": "who was the president of the united states during ww2 and held his govermental position from latest", 
        "question": "What held his governmental position from latest and was the president of the United States during WWII?", 
        "sparql": "#MANUAL SPARQL\nPREFIX ns: <http://rdf.freebase.com/ns/>\nSELECT DISTINCT ?x\nWHERE {\n  ns:m.081pw ns:time.event.start_date ?start ;\n             ns:time.event.end_date ?end .\n  ?x ns:government.politician.government_positions_held  ?y .\n  ?y ns:government.government_position_held.office_position_or_title ns:m.060d2 ; # President of the United States\n     ns:government.government_position_held.from  ?from ;\n     ns:government.government_position_held.to  ?to .\n  FILTER (?from < ?end)\n  FILTER (?to > ?start)?x ns:government.politician.government_positions_held ?c .\n?c ns:government.government_position_held.from ?num .\n}\nORDER BY DESC(?num) LIMIT 1", 
        "compositionality_type": "superlative", 
        "answers": [
            {
                "answer": "Harry S. Truman", 
                "answer_id": "m.09bg4l", 
                "aliases": [
                    "Give 'Em Hell Harry", 
                    "The Man From Missouri", 
                    "The Man of Independence", 
                    "Harry S Truman", 
                    "High Tax Harry", 
                    "Haberdasher Harry", 
                    "President Harry S Truman", 
                    "President Harry Truman", 
                    "Pres. Harry S Truman", 
                    "Get Along Harry", 
                    "President Harry S. Truman", 
                    "Vice President Harry S Truman", 
                    "Harry Truman", 
                    "Truman", 
                    "President Truman"
                ]
            }
        ], 
        "created": "2018-02-13T00:11:21"
    }, 
    {
        "ID": "WebQTest-1711_1fd347fd5826d3b5ddf343900f672d16", 
        "webqsp_ID": "WebQTest-1711", 
        "webqsp_question": "when was the last time the la kings won a playoff series", 
        "machine_question": "when was the last time the the team won the 2014 Stanley Cup Finals championship won a playoff series", 
        "question": "When was the last time the champion of the 2014 Stanley Cup Finals win a playoff series?", 
        "sparql": "PREFIX ns: <http://rdf.freebase.com/ns/>\nSELECT DISTINCT ?x\nWHERE {\nFILTER (?x != ?c)\nFILTER (!isLiteral(?x) OR lang(?x) = '' OR langMatches(lang(?x), 'en'))\n?c ns:sports.sports_team.championships ns:m.010fdzhp . \n?c ns:sports.sports_team.championships ?x .\n?x ns:time.event.end_date ?sk0 .\n}\nORDER BY DESC(xsd:datetime(?sk0))\nLIMIT 1\n", 
        "compositionality_type": "composition", 
        "answers": [
            {
                "answer": "2014 Stanley Cup Finals", 
                "answer_id": "m.010fdzhp", 
                "aliases": []
            }
        ], 
        "created": "2018-02-13T05:49:59"
    }, 
    {
        "ID": "WebQTrn-2710_d4239c135cc47a267443b45dc728358a", 
        "webqsp_ID": "WebQTrn-2710", 
        "webqsp_question": "where are the florida marlins from", 
        "machine_question": "where are the florida marlins from and is the tv show Dexter was filmed there", 
        "question": "The TV show Dexter was filmed in what city where the Florida Marlins are from?", 
        "sparql": "PREFIX ns: <http://rdf.freebase.com/ns/>\nSELECT DISTINCT ?x\nWHERE {\nFILTER (?x != ns:m.02__x)\nFILTER (!isLiteral(?x) OR lang(?x) = '' OR langMatches(lang(?x), 'en'))\nns:m.02__x ns:sports.sports_team.location ?x .\n?x ns:tv.tv_location.tv_shows_filmed_here ns:m.0fhzwl . \n}", 
        "compositionality_type": "conjunction", 
        "answers": [
            {
                "answer": "Miami", 
                "answer_id": "m.0f2v0", 
                "aliases": [
                    "Miami, Florida", 
                    "MIA, 305", 
                    "Miami-Dade County / Miami city"
                ]
            }
        ], 
        "created": "2018-02-13T00:29:42"
    }, 
    {
        "ID": "WebQTrn-3382_a24b8d71d20499c6d7e568317f526a91", 
        "webqsp_ID": "WebQTrn-3382", 
        "webqsp_question": "what currency do italy have", 
        "machine_question": "what currency do the location that contains the city/town Rome have", 
        "question": "What currency does the country where Rome is have?", 
        "sparql": "PREFIX ns: <http://rdf.freebase.com/ns/>\nSELECT DISTINCT ?x\nWHERE {\nFILTER (?x != ?c)\nFILTER (!isLiteral(?x) OR lang(?x) = '' OR langMatches(lang(?x), 'en'))\n?c ns:location.location.contains ?k .\n?k ns:location.mailing_address.citytown ns:m.06c62 . \n?c ns:location.country.currency_used ?x .\n}\n", 
        "compositionality_type": "composition", 
        "answers": [
            {
                "answer": "Euro", 
                "answer_id": "m.02l6h", 
                "aliases": [
                    "\u20ac", 
                    "EUR"
                ]
            }
        ], 
        "created": "2018-02-13T01:48:57"
    }, 
    {
        "ID": "WebQTrn-1793_b8df00139e3fa59b8633ef551ed8ca9f", 
        "webqsp_ID": "WebQTrn-1793", 
        "webqsp_question": "what club did santi cazorla play for", 
        "machine_question": "what club did santi cazorla play for and is the team won the 2010 FIFA World Cup championship", 
        "question": "What club that won the 2010 FIFA World Cup championship and has Santi Cazorla on its roster?", 
        "sparql": "PREFIX ns: <http://rdf.freebase.com/ns/>\nSELECT DISTINCT ?x\nWHERE {\nFILTER (?x != ns:m.0264yjz)\nFILTER (!isLiteral(?x) OR lang(?x) = '' OR langMatches(lang(?x), 'en'))\nns:m.0264yjz ns:sports.pro_athlete.teams ?y .\n?y ns:sports.sports_team_roster.team ?x .\n?x ns:sports.sports_team.championships ns:m.016h2b . \n}", 
        "compositionality_type": "conjunction", 
        "answers": [
            {
                "answer": "Spain national football team", 
                "answer_id": "m.02w64f", 
                "aliases": [
                    "La Furia", 
                    "Spain Mens National Football Team", 
                    "Spain Mens Soccer Team", 
                    "Spain Soccer Team", 
                    "Spain Men's Football Team", 
                    "Spain national football", 
                    "Spain Football Team", 
                    "Spain Men's National Soccer Team", 
                    "Spain Mens National Soccer Team", 
                    "Spain National Soccer Team", 
                    "La Roja", 
                    "Spain National Football Team", 
                    "La Furia Roja", 
                    "Spain Mens Football Team", 
                    "Spain Men's Soccer Team", 
                    "Spain Men's National Football Team"
                ]
            }
        ], 
        "created": "2018-02-12T22:51:58"
    }, 
    {
        "ID": "WebQTrn-131_8c90d5499a627a3478313407b1404ecf", 
        "webqsp_ID": "WebQTrn-131", 
        "webqsp_question": "where do baltimore ravens play", 
        "machine_question": "where do the team won the 2001 AFC Championship Game championship play", 
        "question": "The team that won the 2001 AFC Championship plays where?", 
        "sparql": "PREFIX ns: <http://rdf.freebase.com/ns/>\nSELECT DISTINCT ?x\nWHERE {\nFILTER (?x != ?c)\nFILTER (!isLiteral(?x) OR lang(?x) = '' OR langMatches(lang(?x), 'en'))\n?c ns:sports.sports_team.championships ns:m.0_gt_qt . \n?c ns:sports.sports_team.arena_stadium ?x .\n}\n", 
        "compositionality_type": "composition", 
        "answers": [
            {
                "answer": "M&T Bank Stadium", 
                "answer_id": "m.01yq7r", 
                "aliases": [
                    "M&T Bank Stadium, Baltimore"
                ]
            }
        ], 
        "created": "2018-02-12T19:50:27"
    }, 
    {
        "ID": "WebQTest-1763_78f882dc1f711bbf67aec90c079f9864", 
        "webqsp_ID": "WebQTest-1763", 
        "webqsp_question": "who are the st louis cardinals coaches", 
        "machine_question": "who are the the sports team owner is Fred Hanser coaches", 
        "question": "Who has been the owners of the sports team that has Fred Hasner as the coach?", 
        "sparql": "PREFIX ns: <http://rdf.freebase.com/ns/>\nSELECT DISTINCT ?x\nWHERE {\nFILTER (?x != ?c)\nFILTER (!isLiteral(?x) OR lang(?x) = '' OR langMatches(lang(?x), 'en'))\n?c ns:sports.professional_sports_team.owner_s ns:m.0417nf3 . \n?c ns:baseball.baseball_team.current_coaches ?y .\n?y ns:baseball.current_coaching_tenure.baseball_coach ?x .\n}\n", 
        "compositionality_type": "composition", 
        "answers": [
            {
                "answer": "Joe Pettini", 
                "answer_id": "m.0271dv6", 
                "aliases": []
            }, 
            {
                "answer": "Marty Mason", 
                "answer_id": "m.02p7knr", 
                "aliases": []
            }, 
            {
                "answer": "Hal McRae", 
                "answer_id": "m.03_507", 
                "aliases": []
            }, 
            {
                "answer": "Dave Duncan", 
                "answer_id": "m.07sckg", 
                "aliases": []
            }, 
            {
                "answer": "Jos\u00e9 Oquendo", 
                "answer_id": "m.07vcky", 
                "aliases": [
                    "Jos\u00e9 Manuel Roberto Guillermo Oquendo Contreras", 
                    "Jose Oquendo"
                ]
            }, 
            {
                "answer": "Dave McKay", 
                "answer_id": "m.0glr18", 
                "aliases": [
                    "David Lawrence McKay"
                ]
            }
        ], 
        "created": "2018-02-13T05:56:02"
    }, 
    {
        "ID": "WebQTrn-1896_e0163b7139be75ace8364f761a7922b4", 
        "webqsp_ID": "WebQTrn-1896", 
        "webqsp_question": "what was jack london 's education", 
        "machine_question": "what was jack london 's education and is the education institution has a sports team named California Golden Bears men's basketball", 
        "question": "Which university did Jack London attend that has an athletic squad called California Golden Bears men's basketball?", 
        "sparql": "PREFIX ns: <http://rdf.freebase.com/ns/>\nSELECT DISTINCT ?x\nWHERE {\nFILTER (?x != ns:m.0bt23)\nFILTER (!isLiteral(?x) OR lang(?x) = '' OR langMatches(lang(?x), 'en'))\nns:m.0bt23 ns:people.person.education ?y .\n?y ns:education.education.institution ?x .\n?x ns:education.educational_institution.sports_teams ns:m.0hrfhrm . \n}", 
        "compositionality_type": "conjunction", 
        "answers": [
            {
                "answer": "University of California, Berkeley", 
                "answer_id": "m.02zd460", 
                "aliases": [
                    "UC Berkeley", 
                    "University of California, Berkeley main campus", 
                    "University of California, Berkeley Campus", 
                    "Cal", 
                    "Berkeley"
                ]
            }
        ], 
        "created": "2018-02-12T23:02:56"
    }, 
    {
        "ID": "WebQTest-1171_33c96d5baf27c97a69be11053e224a8f", 
        "webqsp_ID": "WebQTest-1171", 
        "webqsp_question": "who did darth vaders voice", 
        "machine_question": "who did darth vaders voice and is the person notable with the medical condition Stuttering", 
        "question": "Who with Stuttering condition did Darth Vader's voice?", 
        "sparql": "PREFIX ns: <http://rdf.freebase.com/ns/>\nSELECT DISTINCT ?x\nWHERE {\nFILTER (?x != ns:m.0f2y0)\nFILTER (!isLiteral(?x) OR lang(?x) = '' OR langMatches(lang(?x), 'en'))\nns:m.0f2y0 ns:film.film_character.portrayed_in_films ?y .\n?y ns:film.performance.actor ?x .\n?y ns:film.performance.special_performance_type ns:m.02nsjvf .\n?x ns:medicine.notable_person_with_medical_condition.condition ns:m.070yw . \n}", 
        "compositionality_type": "conjunction", 
        "answers": [
            {
                "answer": "James Earl Jones", 
                "answer_id": "m.0f6_x", 
                "aliases": [
                    "Jones", 
                    "James Earl Boggins Jones", 
                    "Todd"
                ]
            }
        ], 
        "created": "2018-02-13T04:50:16"
    }, 
    {
        "ID": "WebQTrn-3057_87afbf2481df60df8476b920f00c4247", 
        "webqsp_ID": "WebQTrn-3057", 
        "webqsp_question": "what year did giants win world series", 
        "machine_question": "what year did the team won the 2012 World Series championship win world series", 
        "question": "What other years did the champion of the 2012 World Series won the World Series?", 
        "sparql": "PREFIX ns: <http://rdf.freebase.com/ns/>\nSELECT DISTINCT ?x\nWHERE {\nFILTER (?x != ?c)\nFILTER (!isLiteral(?x) OR lang(?x) = '' OR langMatches(lang(?x), 'en'))\n?c ns:sports.sports_team.championships ns:m.0ds8qct . \n?c ns:sports.sports_team.championships ?x .\n}\n", 
        "compositionality_type": "composition", 
        "answers": [
            {
                "answer": "2014 World Series", 
                "answer_id": "m.0117q3yz", 
                "aliases": [
                    "2014 World"
                ]
            }, 
            {
                "answer": "2010 World Series", 
                "answer_id": "m.09gnk2r", 
                "aliases": [
                    "2010 World"
                ]
            }, 
            {
                "answer": "2012 World Series", 
                "answer_id": "m.0ds8qct", 
                "aliases": [
                    "2012 World"
                ]
            }
        ], 
        "created": "2018-02-13T01:08:55"
    }, 
    {
        "ID": "WebQTrn-3758_f450c1b77e7230f9d3e4a1a4f94b4dca", 
        "webqsp_ID": "WebQTrn-3758", 
        "webqsp_question": "what empire did maria theresa rule", 
        "machine_question": "what empire did maria theresa rule and the country capital is Budapest", 
        "question": "What empire in the country with Budapest as its capital did Maria Theresa ruled?", 
        "sparql": "PREFIX ns: <http://rdf.freebase.com/ns/>\nSELECT DISTINCT ?x\nWHERE {\nFILTER (?x != ns:m.0czh6)\nFILTER (!isLiteral(?x) OR lang(?x) = '' OR langMatches(lang(?x), 'en'))\nns:m.0czh6 ns:royalty.monarch.kingdom ?x .\n?x ns:location.country.capital ns:m.095w_ . \n}", 
        "compositionality_type": "conjunction", 
        "answers": [
            {
                "answer": "Hungary", 
                "answer_id": "m.03gj2", 
                "aliases": [
                    "Magyarorsz\u00e1g", 
                    "Hungary, Europe"
                ]
            }
        ], 
        "created": "2018-02-13T02:33:05"
    }, 
    {
        "ID": "WebQTrn-2465_ee69ec007fdea6dc0b0d05148fe8e95d", 
        "webqsp_ID": "WebQTrn-2465", 
        "webqsp_question": "what do you speak in singapore", 
        "machine_question": "what do you speak in the currency used in the country is Singapore dollar", 
        "question": "What languges are spoken in the country where the form of currency is the Singapore dollar?", 
        "sparql": "PREFIX ns: <http://rdf.freebase.com/ns/>\nSELECT DISTINCT ?x\nWHERE {\nFILTER (?x != ?c)\nFILTER (!isLiteral(?x) OR lang(?x) = '' OR langMatches(lang(?x), 'en'))\n?c ns:location.country.currency_used ns:m.02f32g . \n?c ns:location.country.languages_spoken ?x .\n}\n", 
        "compositionality_type": "composition", 
        "answers": [
            {
                "answer": "Chinese language", 
                "answer_id": "m.01r2l", 
                "aliases": [
                    "Sinitic language family", 
                    "Chinese language family", 
                    "Chinese"
                ]
            }, 
            {
                "answer": "English Language", 
                "answer_id": "m.02h40lc", 
                "aliases": [
                    "Sekgoa", 
                    "Anglit", 
                    "English language", 
                    "English"
                ]
            }, 
            {
                "answer": "Tamil Language", 
                "answer_id": "m.07c9s", 
                "aliases": [
                    "Thamizh", 
                    "Tamal", 
                    "Damulian", 
                    "Tamili", 
                    "Tamalsan", 
                    "Tambul", 
                    "Tamil"
                ]
            }
        ], 
        "created": "2018-02-12T23:59:26"
    }, 
    {
        "ID": "WebQTrn-220_de764c65ac3c6a870a407dd9cafd0dc9", 
        "webqsp_ID": "WebQTrn-220", 
        "webqsp_question": "what sort of government does brazil have", 
        "machine_question": "what sort of government does the currency used in the country is Brazilian real have", 
        "question": "Which forms of government are present in the nation where Brazilian real is the currency employed?", 
        "sparql": "PREFIX ns: <http://rdf.freebase.com/ns/>\nSELECT DISTINCT ?x\nWHERE {\nFILTER (?x != ?c)\nFILTER (!isLiteral(?x) OR lang(?x) = '' OR langMatches(lang(?x), 'en'))\n?c ns:location.country.currency_used ns:m.03385m . \n?c ns:location.country.form_of_government ?x .\n}\n", 
        "compositionality_type": "composition", 
        "answers": [
            {
                "answer": "Presidential system", 
                "answer_id": "m.01d9r3", 
                "aliases": [
                    "Presidential"
                ]
            }, 
            {
                "answer": "Constitutional republic", 
                "answer_id": "m.0c9rw5", 
                "aliases": [
                    "Constitutional"
                ]
            }, 
            {
                "answer": "Federal republic", 
                "answer_id": "m.0j729", 
                "aliases": [
                    "Federal"
                ]
            }
        ], 
        "created": "2018-02-12T20:01:24"
    }, 
    {
        "ID": "WebQTest-1853_06a84cc9bf03486f3a4d2ddf960f2837", 
        "webqsp_ID": "WebQTest-1853", 
        "webqsp_question": "what made richard hammond famous", 
        "machine_question": "what made the person education institution is Harrogate College famous", 
        "question": "What famous movie maker made Harrogate College widely known?", 
        "sparql": "PREFIX ns: <http://rdf.freebase.com/ns/>\nSELECT DISTINCT ?x\nWHERE {\nFILTER (?x != ?c)\nFILTER (!isLiteral(?x) OR lang(?x) = '' OR langMatches(lang(?x), 'en'))\n?c ns:people.person.education ?k .\n?k ns:education.education.institution ns:m.05szmxs . \n?c ns:people.person.profession ?x .\n}\n", 
        "compositionality_type": "composition", 
        "answers": [
            {
                "answer": "Presenter", 
                "answer_id": "m.015cjr", 
                "aliases": [
                    "Host", 
                    "TV Host", 
                    "Television presenter", 
                    "TV presenter"
                ]
            }, 
            {
                "answer": "Stunt Performer", 
                "answer_id": "m.01tkqy", 
                "aliases": [
                    "Daredevil", 
                    "Stunt actor"
                ]
            }, 
            {
                "answer": "Television producer", 
                "answer_id": "m.03gjzk", 
                "aliases": [
                    "Producer", 
                    "TV Producer"
                ]
            }, 
            {
                "answer": "Radio personality", 
                "answer_id": "m.08z956", 
                "aliases": [
                    "Radio presenter", 
                    "Radio host"
                ]
            }, 
            {
                "answer": "Writer", 
                "answer_id": "m.0cbd2", 
                "aliases": [
                    "Scribe", 
                    "Author"
                ]
            }, 
            {
                "answer": "Journalist", 
                "answer_id": "m.0d8qb", 
                "aliases": [
                    "Rep\u00f3rter"
                ]
            }, 
            {
                "answer": "Screenwriter", 
                "answer_id": "m.0dxtg", 
                "aliases": [
                    "television writer", 
                    "Scriptwriter", 
                    "scenarist", 
                    "tv writer", 
                    "script writer", 
                    "film writer"
                ]
            }, 
            {
                "answer": "Author", 
                "answer_id": "m.0kyk", 
                "aliases": [
                    "Writer"
                ]
            }, 
            {
                "answer": "Voice Actor", 
                "answer_id": "m.0np9r", 
                "aliases": [
                    "Voice talent", 
                    "\u0410\u043a\u0442\u0451\u0440 \u043e\u0437\u0432\u0443\u0447\u0438\u0432\u0430\u043d\u0438\u044f", 
                    "Voice actress", 
                    "Voice-over artist", 
                    "Voice over artist", 
                    "Voice artist", 
                    "Voice Director"
                ]
            }
        ], 
        "created": "2018-02-13T06:11:49"
    }, 
    {
        "ID": "WebQTest-1144_eb6be9ba3dfa705df906a60a2baf1801", 
        "webqsp_ID": "WebQTest-1144", 
        "webqsp_question": "what are the major trading partners of germany", 
        "machine_question": "what are the major trading partners of germany and the country capital is Edinburgh", 
        "question": "Edinburgh is the capital of which nation that is a prominent trading partner of Germany?", 
        "sparql": "#MANUAL SPARQL\nPREFIX ns: <http://rdf.freebase.com/ns/>\nSELECT DISTINCT ?x \nWHERE {\n\tFILTER (?x != ns:m.0345h)\n\t{ \n\t  ns:m.0345h ns:location.statistical_region.places_exported_to ?y .\n\t  ?y ns:location.imports_and_exports.exported_to ?x . \n\t}\n\tUNION\n\t{\n\t  ns:m.0345h ns:location.statistical_region.places_imported_from ?y .\n\t  ?y ns:location.imports_and_exports.imported_from ?x . \n\t}?x ns:location.country.capital ns:m.02m77 . \n}", 
        "compositionality_type": "conjunction", 
        "answers": [
            {
                "answer": "Scotland", 
                "answer_id": "m.06q1r", 
                "aliases": [
                    "Scotia"
                ]
            }
        ], 
        "created": "2018-02-13T04:48:29"
    }, 
    {
        "ID": "WebQTrn-3625_cf25052d54d0206f45e9b56564f71190", 
        "webqsp_ID": "WebQTrn-3625", 
        "webqsp_question": "where is united arab located", 
        "machine_question": "where is the country that has the national anthem Ishy Bilady located", 
        "question": "Where's the country, that has the national anthem of Ishy Bilady, located at?", 
        "sparql": "PREFIX ns: <http://rdf.freebase.com/ns/>\nSELECT DISTINCT ?x\nWHERE {\nFILTER (?x != ?c)\nFILTER (!isLiteral(?x) OR lang(?x) = '' OR langMatches(lang(?x), 'en'))\n?c ns:location.country.national_anthem ?k .\n?k ns:government.national_anthem_of_a_country.anthem ns:m.03ky_d . \n?c ns:location.location.containedby ?x .\n}\n", 
        "compositionality_type": "composition", 
        "answers": [
            {
                "answer": "Arab world", 
                "answer_id": "m.0150_4", 
                "aliases": []
            }, 
            {
                "answer": "Eurasia", 
                "answer_id": "m.02qkt", 
                "aliases": []
            }, 
            {
                "answer": "Southern Sun Hotel Group", 
                "answer_id": "m.02rm8kw", 
                "aliases": [
                    "Southern Sun Hotels"
                ]
            }, 
            {
                "answer": "Middle East", 
                "answer_id": "m.04wsz", 
                "aliases": [
                    "Near East"
                ]
            }, 
            {
                "answer": "Arabian Peninsula", 
                "answer_id": "m.0cvmv", 
                "aliases": [
                    "Arabia"
                ]
            }, 
            {
                "answer": "Asia", 
                "answer_id": "m.0j0k", 
                "aliases": []
            }
        ], 
        "created": "2018-02-13T02:16:51"
    }, 
    {
        "ID": "WebQTrn-772_018dc0c070e53555fa37f63d4b83ca87", 
        "webqsp_ID": "WebQTrn-772", 
        "webqsp_question": "who did the baltimore ravens draft in 2011", 
        "machine_question": "who did the the team has a team moscot named Poe draft in 2011", 
        "question": "Who was the player that was drafted in 2011 by the team with Poe as its mascot?", 
        "sparql": "PREFIX ns: <http://rdf.freebase.com/ns/>\nSELECT DISTINCT ?x\nWHERE {\nFILTER (?x != ?c)\nFILTER (!isLiteral(?x) OR lang(?x) = '' OR langMatches(lang(?x), 'en'))\n?c ns:sports.sports_team.team_mascot ns:m.052tmyg . \n?c ns:sports.professional_sports_team.draft_picks ?y .\n?y ns:sports.sports_league_draft_pick.player ?x .\n?y ns:sports.sports_league_draft_pick.draft ns:m.05sys3j .\n}\n", 
        "compositionality_type": "composition", 
        "answers": [
            {
                "answer": "Jimmy Smith", 
                "answer_id": "m.0drxh6r", 
                "aliases": [
                    "Beans", 
                    "James Smith"
                ]
            }
        ], 
        "created": "2018-02-12T21:01:10"
    }, 
    {
        "ID": "WebQTrn-748_b4177f1736e935a0f7e8204ac8f30ce2", 
        "webqsp_ID": "WebQTrn-748", 
        "webqsp_question": "who did john fox coach for", 
        "machine_question": "who did john fox coach for and is the team has a team moscot named Miles", 
        "question": "What team has John fox as a coach and the mascot named Miles?", 
        "sparql": "PREFIX ns: <http://rdf.freebase.com/ns/>\nSELECT DISTINCT ?x\nWHERE {\nFILTER (?x != ns:m.06_73l)\nFILTER (!isLiteral(?x) OR lang(?x) = '' OR langMatches(lang(?x), 'en'))\nns:m.06_73l ns:sports.sports_team_coach.teams_coached ?y .\n?y ns:sports.sports_team_coach_tenure.team ?x .\n?x ns:sports.sports_team.team_mascot ns:m.027l54x . \n}", 
        "compositionality_type": "conjunction", 
        "answers": [
            {
                "answer": "Denver Broncos", 
                "answer_id": "m.0289q", 
                "aliases": [
                    "Orange Crush"
                ]
            }
        ], 
        "created": "2018-02-12T21:00:10"
    }, 
    {
        "ID": "WebQTrn-3129_2ed287b0ef57067bd3a79f71c2fa849e", 
        "webqsp_ID": "WebQTrn-3129", 
        "webqsp_question": "what is the political system in argentina", 
        "machine_question": "what is the political system in the country that has the national anthem Argentine National Anthem", 
        "question": "What political system is used in the country with national anthem called Angentine National Anthem?", 
        "sparql": "PREFIX ns: <http://rdf.freebase.com/ns/>\nSELECT DISTINCT ?x\nWHERE {\nFILTER (?x != ?c)\nFILTER (!isLiteral(?x) OR lang(?x) = '' OR langMatches(lang(?x), 'en'))\n?c ns:location.country.national_anthem ?k .\n?k ns:government.national_anthem_of_a_country.anthem ns:m.01dlgn . \n?c ns:location.country.form_of_government ?x .\n}\n", 
        "compositionality_type": "composition", 
        "answers": [
            {
                "answer": "Presidential system", 
                "answer_id": "m.01d9r3", 
                "aliases": [
                    "Presidential"
                ]
            }, 
            {
                "answer": "Constitutional republic", 
                "answer_id": "m.0c9rw5", 
                "aliases": [
                    "Constitutional"
                ]
            }, 
            {
                "answer": "Representative democracy", 
                "answer_id": "m.0drnm", 
                "aliases": []
            }, 
            {
                "answer": "Federal republic", 
                "answer_id": "m.0j729", 
                "aliases": [
                    "Federal"
                ]
            }
        ], 
        "created": "2018-02-13T01:16:50"
    }, 
    {
        "ID": "WebQTrn-2302_91486f8ce518ad60645488b0b298ff11", 
        "webqsp_ID": "WebQTrn-2302", 
        "webqsp_question": "what continent is australia in", 
        "machine_question": "what continent is the location time zone is Heard and McDonald Islands\u00c2\u00a0Time Zone in", 
        "question": "Which continent inlcudes land in the Heard and McDonald Islands Time Zone?", 
        "sparql": "PREFIX ns: <http://rdf.freebase.com/ns/>\nSELECT DISTINCT ?x\nWHERE {\nFILTER (?x != ?c)\nFILTER (!isLiteral(?x) OR lang(?x) = '' OR langMatches(lang(?x), 'en'))\n?c ns:location.location.time_zones ns:m.0y49btq . \n?c ns:location.location.containedby ?x .\n?x ns:common.topic.notable_types ns:m.01mh .\n}\n", 
        "compositionality_type": "composition", 
        "answers": [
            {
                "answer": "Oceania", 
                "answer_id": "m.05nrg", 
                "aliases": []
            }, 
            {
                "answer": "Australian Continent", 
                "answer_id": "m.09pkq0", 
                "aliases": [
                    "Australia", 
                    "Down Under"
                ]
            }
        ], 
        "created": "2018-02-12T23:44:32"
    }, 
    {
        "ID": "WebQTrn-992_847fede584cbd777dfa2d08a1c06ed49", 
        "webqsp_ID": "WebQTrn-992", 
        "webqsp_question": "what form of government does brazil have", 
        "machine_question": "what form of government does the country capital is Bras\u00c3\u00adlia have", 
        "question": "What is the type of government in the country whose capital is Brazil?", 
        "sparql": "PREFIX ns: <http://rdf.freebase.com/ns/>\nSELECT DISTINCT ?x\nWHERE {\nFILTER (?x != ?c)\nFILTER (!isLiteral(?x) OR lang(?x) = '' OR langMatches(lang(?x), 'en'))\n?c ns:location.country.capital ns:m.01hy_ . \n?c ns:location.country.form_of_government ?x .\n}\n", 
        "compositionality_type": "composition", 
        "answers": [
            {
                "answer": "Presidential system", 
                "answer_id": "m.01d9r3", 
                "aliases": [
                    "Presidential"
                ]
            }, 
            {
                "answer": "Constitutional republic", 
                "answer_id": "m.0c9rw5", 
                "aliases": [
                    "Constitutional"
                ]
            }, 
            {
                "answer": "Federal republic", 
                "answer_id": "m.0j729", 
                "aliases": [
                    "Federal"
                ]
            }
        ], 
        "created": "2018-02-12T21:29:51"
    }, 
    {
        "ID": "WebQTrn-981_7280a830b2275c6024614d5ba2adae18", 
        "webqsp_ID": "WebQTrn-981", 
        "webqsp_question": "what does latin america consist of", 
        "machine_question": "what does latin america consist of and is the location that appointed Otto P\u00c3\u00a9rez Molina to govermental position", 
        "question": "The location that appointed Otto P\u00c3\u00a9rez Molina to govermental position is what part of Latin America?", 
        "sparql": "PREFIX ns: <http://rdf.freebase.com/ns/>\nSELECT DISTINCT ?x\nWHERE {\nFILTER (?x != ns:m.04pnx)\nFILTER (!isLiteral(?x) OR lang(?x) = '' OR langMatches(lang(?x), 'en'))\nns:m.04pnx ns:location.location.contains ?x .\n?x ns:common.topic.notable_types ns:m.01mp .\n?x ns:government.governmental_jurisdiction.governing_officials ?c .\n?c ns:government.government_position_held.appointed_by ns:m.02z7rt8 . \n}", 
        "compositionality_type": "conjunction", 
        "answers": [
            {
                "answer": "Guatemala", 
                "answer_id": "m.0345_", 
                "aliases": [
                    "Guatemala."
                ]
            }
        ], 
        "created": "2018-02-12T21:29:09"
    }, 
    {
        "ID": "WebQTrn-2397_98144e649bed70bead19b101d72b1bc0", 
        "webqsp_ID": "WebQTrn-2397", 
        "webqsp_question": "what year did arizona diamondbacks win the world series", 
        "machine_question": "what year did the team has a team moscot named D. Baxter the Bobcat win the world series", 
        "question": "What year did the team with the mascot D. Baxter the Bobcat win the World Series?", 
        "sparql": "PREFIX ns: <http://rdf.freebase.com/ns/>\nSELECT DISTINCT ?x\nWHERE {\nFILTER (?x != ?c)\nFILTER (!isLiteral(?x) OR lang(?x) = '' OR langMatches(lang(?x), 'en'))\n?c ns:sports.sports_team.team_mascot ns:m.088pfp . \n?c ns:sports.sports_team.championships ?x .\n}\n", 
        "compositionality_type": "composition", 
        "answers": [
            {
                "answer": "2001 World Series", 
                "answer_id": "m.018my", 
                "aliases": [
                    "2001 World"
                ]
            }
        ], 
        "created": "2018-02-12T23:51:54"
    }, 
    {
        "ID": "WebQTest-171_8c6b952c6bd963f0ece4e401c9eb731a", 
        "webqsp_ID": "WebQTest-171", 
        "webqsp_question": "what airport do you fly into to get to destin fl", 
        "machine_question": "what airport do you fly into to get to destin fl and the location time zone is Central Time Zone", 
        "question": "What Centrail Time Zone airport do you fly in to get to Destin, Fl?", 
        "sparql": "PREFIX ns: <http://rdf.freebase.com/ns/>\nSELECT DISTINCT ?x\nWHERE {\nFILTER (?x != ns:m.0rp8x)\nFILTER (!isLiteral(?x) OR lang(?x) = '' OR langMatches(lang(?x), 'en'))\nns:m.0rp8x ns:location.location.nearby_airports ?x .\n?x ns:location.location.time_zones ns:m.02fqwt . \n}", 
        "compositionality_type": "conjunction", 
        "answers": [
            {
                "answer": "Destin\u2013Fort Walton Beach Airport", 
                "answer_id": "m.01q6d0", 
                "aliases": [
                    "Okaloosa Airport", 
                    "Northwest Florida Regional Airport", 
                    "Northwest Florida Airport"
                ]
            }
        ], 
        "created": "2018-02-13T02:53:02"
    }, 
    {
        "ID": "WebQTrn-2601_f35e686ee64f4e58825736c365dccfa7", 
        "webqsp_ID": "WebQTrn-2601", 
        "webqsp_question": "who did warren moon play for", 
        "machine_question": "who did warren moon play for and is the team has a team moscot named K. C. Wolf", 
        "question": "What team with a mascot named K.C. Wolf did Warren Moon play for?", 
        "sparql": "PREFIX ns: <http://rdf.freebase.com/ns/>\nSELECT DISTINCT ?x\nWHERE {\nFILTER (?x != ns:m.01b0dl)\nFILTER (!isLiteral(?x) OR lang(?x) = '' OR langMatches(lang(?x), 'en'))\nns:m.01b0dl ns:sports.pro_athlete.teams ?y .\n?y ns:sports.sports_team_roster.team ?x .\n?x ns:sports.sports_team.team_mascot ns:m.09pz97 . \n}", 
        "compositionality_type": "conjunction", 
        "answers": [
            {
                "answer": "Kansas City Chiefs", 
                "answer_id": "m.0487_", 
                "aliases": []
            }
        ], 
        "created": "2018-02-13T00:18:15"
    }, 
    {
        "ID": "WebQTest-1604_0f1d384919bac2772e7f384ffd0116fe", 
        "webqsp_ID": "WebQTest-1604", 
        "webqsp_question": "what countries speak english natively", 
        "machine_question": "what countries speak english natively and is the country that contains North Island", 
        "question": "What English speaking country that has North Island?", 
        "sparql": "PREFIX ns: <http://rdf.freebase.com/ns/>\nSELECT DISTINCT ?x\nWHERE {\nFILTER (?x != ns:m.02h40lc)\nFILTER (!isLiteral(?x) OR lang(?x) = '' OR langMatches(lang(?x), 'en'))\nns:m.02h40lc ns:language.human_language.main_country ?x .\n?x ns:location.country.administrative_divisions ns:m.010pzzv_ . \n}", 
        "compositionality_type": "conjunction", 
        "answers": [
            {
                "answer": "New Zealand", 
                "answer_id": "m.0ctw_b", 
                "aliases": [
                    "God's own", 
                    "NZ", 
                    "Land of the long white cloud", 
                    "Aotearoa"
                ]
            }
        ], 
        "created": "2018-02-13T05:39:12"
    }, 
    {
        "ID": "WebQTest-1373_42588c6fd3d30a777953bbaf2b4079b9", 
        "webqsp_ID": "WebQTest-1373", 
        "webqsp_question": "where was john f kennedy when he got shot", 
        "machine_question": "where was the person education institution is Edward Devotion School when he got shot", 
        "question": "Where did the famous person who went to Edward Devotion School get shot at?", 
        "sparql": "PREFIX ns: <http://rdf.freebase.com/ns/>\nSELECT DISTINCT ?x\nWHERE {\nFILTER (?x != ?c)\nFILTER (!isLiteral(?x) OR lang(?x) = '' OR langMatches(lang(?x), 'en'))\n?c ns:people.person.education ?k .\n?k ns:education.education.institution ns:m.0ccg42 . \n?c ns:people.deceased_person.place_of_death ?x .\n}\n", 
        "compositionality_type": "composition", 
        "answers": [
            {
                "answer": "Dallas", 
                "answer_id": "m.0f2rq", 
                "aliases": [
                    "Dallas, Texas", 
                    "Dallas, TX", 
                    "Rockwall County / Dallas city"
                ]
            }
        ], 
        "created": "2018-02-13T05:12:47"
    }, 
    {
        "ID": "WebQTrn-440_12b9267b6d65493e563247380b44dd24", 
        "webqsp_ID": "WebQTrn-440", 
        "webqsp_question": "what was the first name of the washington redskins", 
        "machine_question": "what was the first name of the the sports team with the fight song Hail to the Redskins", 
        "question": "What was the original name of the team who has the fight song \"Hail to the Redskins\"?", 
        "sparql": "PREFIX ns: <http://rdf.freebase.com/ns/>\nSELECT DISTINCT ?x\nWHERE {\nFILTER (?x != ?c)\nFILTER (!isLiteral(?x) OR lang(?x) = '' OR langMatches(lang(?x), 'en'))\n?c ns:sports.sports_team.fight_song ns:m.0234px . \n?c ns:sports.sports_team.previously_known_as ?x .\n}\n", 
        "compositionality_type": "composition", 
        "answers": [
            {
                "answer": "Boston Redskins", 
                "answer_id": "m.06mp_z5", 
                "aliases": []
            }
        ], 
        "created": "2018-02-12T20:28:44"
    }, 
    {
        "ID": "WebQTrn-1329_f16d49d9bf873fa21c99e69f1c67c6ae", 
        "webqsp_ID": "WebQTrn-1329", 
        "webqsp_question": "what club team is diego forlan on", 
        "machine_question": "what club team is diego forlan on and is the team won the 1920 South American Championship championship", 
        "question": "What team was Diego Forlan on that won the 1920 South American Championship?", 
        "sparql": "PREFIX ns: <http://rdf.freebase.com/ns/>\nSELECT DISTINCT ?x\nWHERE {\nFILTER (?x != ns:m.03g66x)\nFILTER (!isLiteral(?x) OR lang(?x) = '' OR langMatches(lang(?x), 'en'))\nns:m.03g66x ns:sports.pro_athlete.teams ?y .\n?y ns:sports.sports_team_roster.team ?x .\nFILTER(NOT EXISTS {?y ns:sports.sports_team_roster.from ?sk0} || \nEXISTS {?y ns:sports.sports_team_roster.from ?sk1 . \nFILTER(xsd:datetime(?sk1) <= \"2015-08-10\"^^xsd:dateTime) })\nFILTER(NOT EXISTS {?y ns:sports.sports_team_roster.to ?sk2} || \nEXISTS {?y ns:sports.sports_team_roster.to ?sk3 . \nFILTER(xsd:datetime(?sk3) >= \"2015-08-10\"^^xsd:dateTime) })\n?x ns:sports.sports_team.championships ns:m.03_gp5 . \n}", 
        "compositionality_type": "conjunction", 
        "answers": [
            {
                "answer": "Uruguay national football team", 
                "answer_id": "m.0329r5", 
                "aliases": [
                    "Uruguay National Soccer Team", 
                    "Uruguay National Football Team", 
                    "Uruguay Soccer Team", 
                    "Uruguay Men's National Football Team", 
                    "Uruguay Men's Soccer Team", 
                    "La Garra Charr\u00faa", 
                    "Uruguay Mens National Soccer Team", 
                    "Uruguay Mens Football Team", 
                    "Uruguay national football", 
                    "Uruguay Football Team", 
                    "Los Charr\u00faas", 
                    "Uruguay Men's Football Team", 
                    "Uruguay Mens Soccer Team", 
                    "Uruguay Mens National Football Team", 
                    "La Celeste", 
                    "Uruguay Men's National Soccer Team"
                ]
            }
        ], 
        "created": "2018-02-12T22:06:56"
    }, 
    {
        "ID": "WebQTrn-2917_94be2c905d6639c24b407aaf7e92292b", 
        "webqsp_ID": "WebQTrn-2917", 
        "webqsp_question": "who is the president of ecuador in 2012", 
        "machine_question": "who is the president of the country that contains Guayas in 2012", 
        "question": "The country which contain Guayas in 2012 has who as President?", 
        "sparql": "PREFIX ns: <http://rdf.freebase.com/ns/>\nSELECT DISTINCT ?x\nWHERE {\nFILTER (?x != ?c)\nFILTER (!isLiteral(?x) OR lang(?x) = '' OR langMatches(lang(?x), 'en'))\n?c ns:location.country.administrative_divisions ns:m.01fkp_ . \n?c ns:government.governmental_jurisdiction.governing_officials ?y .\n?y ns:government.government_position_held.office_holder ?x .\n?y ns:government.government_position_held.basic_title ns:m.060c4 .\nFILTER(NOT EXISTS {?y ns:government.government_position_held.from ?sk0} || \nEXISTS {?y ns:government.government_position_held.from ?sk1 . \nFILTER(xsd:datetime(?sk1) <= \"2012-12-31\"^^xsd:dateTime) })\nFILTER(NOT EXISTS {?y ns:government.government_position_held.to ?sk2} || \nEXISTS {?y ns:government.government_position_held.to ?sk3 . \nFILTER(xsd:datetime(?sk3) >= \"2012-01-01\"^^xsd:dateTime) })\n}\n", 
        "compositionality_type": "composition", 
        "answers": [
            {
                "answer": "Rafael Correa", 
                "answer_id": "m.0h7c_l", 
                "aliases": [
                    "Rafael Vicente Correa Delgado", 
                    "Rafael Correa Delgado"
                ]
            }
        ], 
        "created": "2018-02-13T00:54:17"
    }, 
    {
        "ID": "WebQTrn-3082_906ad6be7bec9d208f4dde4f7721c261", 
        "webqsp_ID": "WebQTrn-3082", 
        "webqsp_question": "what all countries are in south america", 
        "machine_question": "what all countries are in south america and is the co2 emiisions per capita was once 2009 metric ton", 
        "question": "What countries in South American had the CO2 emissions per capita of 2009 metric ton?", 
        "sparql": "PREFIX ns: <http://rdf.freebase.com/ns/>\nSELECT DISTINCT ?x\nWHERE {\nFILTER (?x != ns:m.06n3y)\nFILTER (!isLiteral(?x) OR lang(?x) = '' OR langMatches(lang(?x), 'en'))\nns:m.06n3y ns:location.location.contains ?x .\n?x ns:common.topic.notable_types ns:m.01mp .\n?x ns:location.statistical_region.co2_emissions_per_capita ?c .\n?c ns:measurement_unit.dated_metric_ton.date \"2009\"^^xsd:dateTime . \n}", 
        "compositionality_type": "conjunction", 
        "answers": [
            {
                "answer": "Brazil", 
                "answer_id": "m.015fr", 
                "aliases": [
                    "Brazilian ", 
                    "Rep\u00fablica Federativa do Brasil", 
                    "Brasil", 
                    "Federative Republic of Brazil"
                ]
            }, 
            {
                "answer": "Bolivia", 
                "answer_id": "m.0165v", 
                "aliases": [
                    "The Plurinational State of Bolivia"
                ]
            }, 
            {
                "answer": "Peru", 
                "answer_id": "m.016wzw", 
                "aliases": []
            }, 
            {
                "answer": "Colombia", 
                "answer_id": "m.01ls2", 
                "aliases": [
                    "\u30b3\u30ed\u30f3\u30d3\u30a2\u5171\u548c\u56fd", 
                    "Republic of Colombia"
                ]
            }, 
            {
                "answer": "Guyana", 
                "answer_id": "m.034m8", 
                "aliases": [
                    "El Dorado"
                ]
            }, 
            {
                "answer": "Paraguay", 
                "answer_id": "m.05v10", 
                "aliases": [
                    "Corazon de America", 
                    "Heart of America", 
                    "Republic of Paraguay", 
                    "Coraz\u00f3n de Am\u00e9rica"
                ]
            }, 
            {
                "answer": "Suriname", 
                "answer_id": "m.06nnj", 
                "aliases": [
                    "Republic of Suriname", 
                    "Surinam"
                ]
            }, 
            {
                "answer": "Uruguay", 
                "answer_id": "m.07twz", 
                "aliases": [
                    "Eastern Republic of the Uruguay", 
                    "Republic East of the Uruguay", 
                    "Eastern Republic of Uruguay", 
                    "Oriental Republic of Uruguay"
                ]
            }, 
            {
                "answer": "Venezuela", 
                "answer_id": "m.07ylj", 
                "aliases": [
                    "Bolivarian Republic of Venezuela"
                ]
            }, 
            {
                "answer": "Argentina", 
                "answer_id": "m.0jgd", 
                "aliases": [
                    "The Argentine", 
                    "Agrentina ", 
                    "Argentine Republic"
                ]
            }
        ], 
        "created": "2018-02-13T01:12:18"
    }, 
    {
        "ID": "WebQTest-878_a3af159c0a6db13e6a3cff4cfca99f5c", 
        "webqsp_ID": "WebQTest-878", 
        "webqsp_question": "who do islamic people pray to", 
        "machine_question": "who do the religion organiztion is Tamil Nadu Thowheed Jamath people pray to", 
        "question": "Who does the Tamil Nadu Thowheed Jamath religion pray too?", 
        "sparql": "PREFIX ns: <http://rdf.freebase.com/ns/>\nSELECT DISTINCT ?x\nWHERE {\nFILTER (?x != ?c)\nFILTER (!isLiteral(?x) OR lang(?x) = '' OR langMatches(lang(?x), 'en'))\n?c ns:religion.religion.organizations ns:m.010ffmhn . \n?c ns:religion.religion.deities ?x .\n}\n", 
        "compositionality_type": "composition", 
        "answers": [
            {
                "answer": "Ramdev Pir", 
                "answer_id": "m.055v4c", 
                "aliases": [
                    "Baba Ramdevji"
                ]
            }, 
            {
                "answer": "God", 
                "answer_id": "m.0d05l6", 
                "aliases": [
                    "Yahweh", 
                    "Deus", 
                    "Jah", 
                    "Elohim"
                ]
            }, 
            {
                "answer": "Allah", 
                "answer_id": "m.0jfd", 
                "aliases": [
                    "Ar-Rahman"
                ]
            }
        ], 
        "created": "2018-02-13T04:20:56"
    }, 
    {
        "ID": "WebQTrn-2856_25fe3a8b83c90579605d24520b565578", 
        "webqsp_ID": "WebQTrn-2856", 
        "webqsp_question": "what countries in the world speak arabic", 
        "machine_question": "what countries in the world speak arabic and is the tv show Zola Levitt Presents was filmed there", 
        "question": "What Arabic speaking country did Zola Levitt Present was filmed in?", 
        "sparql": "PREFIX ns: <http://rdf.freebase.com/ns/>\nSELECT DISTINCT ?x\nWHERE {\nFILTER (?x != ns:m.0jzc)\nFILTER (!isLiteral(?x) OR lang(?x) = '' OR langMatches(lang(?x), 'en'))\nns:m.0jzc ns:language.human_language.countries_spoken_in ?x .\n?x ns:tv.tv_location.tv_shows_filmed_here ns:m.07chkxq . \n}", 
        "compositionality_type": "conjunction", 
        "answers": [
            {
                "answer": "Israel", 
                "answer_id": "m.03spz", 
                "aliases": [
                    "State of Israel"
                ]
            }
        ], 
        "created": "2018-02-13T00:48:16"
    }, 
    {
        "ID": "WebQTrn-2569_49842e208a5dd584154dd0a96881bc05", 
        "webqsp_ID": "WebQTrn-2569", 
        "webqsp_question": "where do the houston rockets play basketball", 
        "machine_question": "where do the the basket ball team head coach is Kevin McHale play basketball", 
        "question": "Where does the team head coached by Kevin McHale play basketball?", 
        "sparql": "PREFIX ns: <http://rdf.freebase.com/ns/>\nSELECT DISTINCT ?x\nWHERE {\nFILTER (?x != ?c)\nFILTER (!isLiteral(?x) OR lang(?x) = '' OR langMatches(lang(?x), 'en'))\n?c ns:basketball.basketball_team.head_coach ns:m.04b87b . \n?c ns:sports.sports_team.arena_stadium ?x .\n}\n", 
        "compositionality_type": "composition", 
        "answers": [
            {
                "answer": "Toyota Center", 
                "answer_id": "m.01tx3t", 
                "aliases": [
                    "Toyota", 
                    "Toyota Center, Houston"
                ]
            }, 
            {
                "answer": "Lakewood Church Central Campus", 
                "answer_id": "m.01txlf", 
                "aliases": [
                    "The Summit", 
                    "Lakewood Church Central Campus, Houston", 
                    "Compaq Center"
                ]
            }
        ], 
        "created": "2018-02-13T00:11:06"
    }, 
    {
        "ID": "WebQTrn-356_a7cd8cc592cd49fdae044561d5c57dc8", 
        "webqsp_ID": "WebQTrn-356", 
        "webqsp_question": "what continent is south africa part of", 
        "machine_question": "what continent is the country that contains KwaZulu-Natal part of", 
        "question": "What continent is the country that contains KwaZulu-Natal part of?", 
        "sparql": "PREFIX ns: <http://rdf.freebase.com/ns/>\nSELECT DISTINCT ?x\nWHERE {\nFILTER (?x != ?c)\nFILTER (!isLiteral(?x) OR lang(?x) = '' OR langMatches(lang(?x), 'en'))\n?c ns:location.country.administrative_divisions ns:m.01bh3l . \n?c ns:base.locations.countries.continent ?x .\n}\n", 
        "compositionality_type": "composition", 
        "answers": [
            {
                "answer": "Africa", 
                "answer_id": "m.0dg3n1", 
                "aliases": [
                    "Afrique"
                ]
            }
        ], 
        "created": "2018-02-12T20:17:00"
    }, 
    {
        "ID": "WebQTest-1151_799804056310383bba960a7649b85b4f", 
        "webqsp_ID": "WebQTest-1151", 
        "webqsp_question": "where did charles darwin and his wife live", 
        "machine_question": "where did the person who once lived in Downe, Kent and his wife live", 
        "question": "Where all have the notable person who once lived in Downe, Kent and his wife lived?", 
        "sparql": "PREFIX ns: <http://rdf.freebase.com/ns/>\nSELECT DISTINCT ?x\nWHERE {\nFILTER (?x != ?c)\nFILTER (!isLiteral(?x) OR lang(?x) = '' OR langMatches(lang(?x), 'en'))\n?c ns:people.person.places_lived ?k .\n?k ns:people.place_lived.location ns:m.030r7l4 . \n?c ns:people.person.places_lived ?y .\n?y ns:people.place_lived.location ?x .\n}\n", 
        "compositionality_type": "composition", 
        "answers": [
            {
                "answer": "Shrewsbury", 
                "answer_id": "m.0235n9", 
                "aliases": [
                    "Shrewsbury, England"
                ]
            }, 
            {
                "answer": "England", 
                "answer_id": "m.02jx1", 
                "aliases": [
                    "Albion", 
                    "Pow Sows", 
                    "England", 
                    "Loegria"
                ]
            }, 
            {
                "answer": "Downe, Kent", 
                "answer_id": "m.030r7l4", 
                "aliases": []
            }, 
            {
                "answer": "London", 
                "answer_id": "m.04jpl", 
                "aliases": [
                    "the (big) smoke", 
                    "The Great Wen", 
                    "London, England", 
                    "Londres", 
                    "Capital of Great Britain"
                ]
            }
        ], 
        "created": "2018-02-13T04:48:41"
    }, 
    {
        "ID": "WebQTrn-3437_209dc96af55c6a84e51503b7e7f1b2a2", 
        "webqsp_ID": "WebQTrn-3437", 
        "webqsp_question": "who speaks arabic language", 
        "machine_question": "who speaks arabic language and the country capital is Baghdad", 
        "question": "Baghdad is the country of which Arabic speaking country?", 
        "sparql": "PREFIX ns: <http://rdf.freebase.com/ns/>\nSELECT DISTINCT ?x\nWHERE {\nFILTER (?x != ns:m.0jzc)\nFILTER (!isLiteral(?x) OR lang(?x) = '' OR langMatches(lang(?x), 'en'))\nns:m.0jzc ns:language.human_language.countries_spoken_in ?x .\n?x ns:location.country.capital ns:m.01fqm . \n}", 
        "compositionality_type": "conjunction", 
        "answers": [
            {
                "answer": "Iraq", 
                "answer_id": "m.0d05q4", 
                "aliases": []
            }
        ], 
        "created": "2018-02-13T01:55:49"
    }, 
    {
        "ID": "WebQTrn-13_596dd0eda824f1473f96b3e5a3015760", 
        "webqsp_ID": "WebQTrn-13", 
        "webqsp_question": "which countries border the us", 
        "machine_question": "which countries border the us and is the net migration number was -1377252", 
        "question": "Which US bordering country's net migration number was -1377252?", 
        "sparql": "PREFIX ns: <http://rdf.freebase.com/ns/>\nSELECT DISTINCT ?x\nWHERE {\nFILTER (?x != ns:m.09c7w0)\nFILTER (!isLiteral(?x) OR lang(?x) = '' OR langMatches(lang(?x), 'en'))\nns:m.09c7w0 ns:location.location.adjoin_s ?y .\n?y ns:location.adjoining_relationship.adjoins ?x .\n?x ns:common.topic.notable_types ns:m.01mp .\n?x ns:location.statistical_region.net_migration ?c .\n?c ns:measurement_unit.dated_integer.number \"-1377252\" . \n}", 
        "compositionality_type": "conjunction", 
        "answers": [
            {
                "answer": "Mexico", 
                "answer_id": "m.0b90_r", 
                "aliases": [
                    "M\u00e9jico", 
                    "M\u00e9xico", 
                    "Estados Unidos Mexicanos", 
                    "United Mexican States"
                ]
            }
        ], 
        "created": "2018-02-12T19:39:16"
    }, 
    {
        "ID": "WebQTrn-2165_524908899a8aa334a18a0ac00f8f2fe6", 
        "webqsp_ID": "WebQTrn-2165", 
        "webqsp_question": "what language do haitian speak", 
        "machine_question": "what language do the country that contains Nord-Est Department speak", 
        "question": "If you are in a country visiting the Nord-est department what languages would be spoken?", 
        "sparql": "PREFIX ns: <http://rdf.freebase.com/ns/>\nSELECT DISTINCT ?x\nWHERE {\nFILTER (?x != ?c)\nFILTER (!isLiteral(?x) OR lang(?x) = '' OR langMatches(lang(?x), 'en'))\n?c ns:location.country.administrative_divisions ns:m.02g_z8 . \n?c ns:location.country.languages_spoken ?x .\n}\n", 
        "compositionality_type": "composition", 
        "answers": [
            {
                "answer": "Haitian Creole", 
                "answer_id": "m.02dhwl", 
                "aliases": [
                    "Haitian Creole French", 
                    "Kreyol", 
                    "Aiysyen", 
                    "Plateau Haitian Creole language"
                ]
            }, 
            {
                "answer": "French", 
                "answer_id": "m.064_8sq", 
                "aliases": [
                    "Francais", 
                    "Fran\u00e7ais", 
                    "French", 
                    "French language"
                ]
            }
        ], 
        "created": "2018-02-12T23:31:17"
    }, 
    {
        "ID": "WebQTrn-3620_3df24202c3356629d2d53d278ef80e20", 
        "webqsp_ID": "WebQTrn-3620", 
        "webqsp_question": "what is currency in panama", 
        "machine_question": "what is currency in the country that contains Guna Yala", 
        "question": "What currency is used in the country that has Guna Yala?", 
        "sparql": "PREFIX ns: <http://rdf.freebase.com/ns/>\nSELECT DISTINCT ?x\nWHERE {\nFILTER (?x != ?c)\nFILTER (!isLiteral(?x) OR lang(?x) = '' OR langMatches(lang(?x), 'en'))\n?c ns:location.country.administrative_divisions ns:m.01pdr_ . \n?c ns:location.country.currency_used ?x .\n}\n", 
        "compositionality_type": "composition", 
        "answers": [
            {
                "answer": "Panamanian balboa", 
                "answer_id": "m.0200cp", 
                "aliases": []
            }, 
            {
                "answer": "United States Dollar", 
                "answer_id": "m.09nqf", 
                "aliases": [
                    "USD", 
                    "$", 
                    "US Dollar", 
                    "US $", 
                    "US Currency", 
                    "US$", 
                    "Federal Reserve Note", 
                    "American Dollar", 
                    "Greenback"
                ]
            }
        ], 
        "created": "2018-02-13T02:15:34"
    }, 
    {
        "ID": "WebQTrn-648_cb60fbc3dea230fc32682cbb8556ba62", 
        "webqsp_ID": "WebQTrn-648", 
        "webqsp_question": "what continent does israel belong to", 
        "machine_question": "what continent does the location that appointed Benjamin Netanyahu to govermental position belong to", 
        "question": "What continent does the country where Benjamin Netanyahu is in a governmental position belong to?", 
        "sparql": "PREFIX ns: <http://rdf.freebase.com/ns/>\nSELECT DISTINCT ?x\nWHERE {\nFILTER (?x != ?c)\nFILTER (!isLiteral(?x) OR lang(?x) = '' OR langMatches(lang(?x), 'en'))\n?c ns:government.governmental_jurisdiction.governing_officials ?k .\n?k ns:government.government_position_held.appointed_by ns:m.0fm2h . \n?c ns:base.locations.countries.continent ?x .\n}\n", 
        "compositionality_type": "composition", 
        "answers": [
            {
                "answer": "Asia", 
                "answer_id": "m.0j0k", 
                "aliases": []
            }
        ], 
        "created": "2018-02-12T20:51:37"
    }, 
    {
        "ID": "WebQTrn-3322_770d8b533fd2f564cf8401e6727b03f6", 
        "webqsp_ID": "WebQTrn-3322", 
        "webqsp_question": "what countries are on the mediterranean sea", 
        "machine_question": "what countries are on the mediterranean sea and is the country that contains Zonguldak Province", 
        "question": "What country on the Mediterranean Sea contains the Zonguldak Province?", 
        "sparql": "PREFIX ns: <http://rdf.freebase.com/ns/>\nSELECT DISTINCT ?x\nWHERE {\nFILTER (?x != ns:m.04swx)\nFILTER (!isLiteral(?x) OR lang(?x) = '' OR langMatches(lang(?x), 'en'))\nns:m.04swx ns:location.location.adjoin_s ?y .\n?y ns:location.adjoining_relationship.adjoins ?x .\n?x ns:common.topic.notable_types ns:m.01mp .\n?x ns:location.country.administrative_divisions ns:m.01nbgn . \n}", 
        "compositionality_type": "conjunction", 
        "answers": [
            {
                "answer": "Turkey", 
                "answer_id": "m.01znc_", 
                "aliases": [
                    "Republic of Turkey", 
                    "T\u00fcrkiye", 
                    "Turkiye"
                ]
            }
        ], 
        "created": "2018-02-13T01:39:22"
    }, 
    {
        "ID": "WebQTest-802_8562012e739a0e7aee294a26ad53e581", 
        "webqsp_ID": "WebQTest-802", 
        "webqsp_question": "what musical instruments does justin bieber play", 
        "machine_question": "what musical instruments does the artist had a concert tour named Believe Tour play", 
        "question": "The performer who went on a concert tour called Believe Tour plays which musical instruments?", 
        "sparql": "PREFIX ns: <http://rdf.freebase.com/ns/>\nSELECT DISTINCT ?x\nWHERE {\nFILTER (?x != ?c)\nFILTER (!isLiteral(?x) OR lang(?x) = '' OR langMatches(lang(?x), 'en'))\n?c ns:music.artist.concert_tours ns:m.0j_3p6t . \n?c ns:music.artist.track_contributions ?y .\n?y ns:music.track_contribution.role ?x .\n}\n", 
        "compositionality_type": "composition", 
        "answers": [
            {
                "answer": "Vocals", 
                "answer_id": "m.0290ngj", 
                "aliases": [
                    "main vocals", 
                    "Clean vocals", 
                    "vocals", 
                    "vocal", 
                    "Vocal"
                ]
            }
        ], 
        "created": "2018-02-13T04:11:26"
    }, 
    {
        "ID": "WebQTrn-3694_73bb87158a068132f7511dc63566c924", 
        "webqsp_ID": "WebQTrn-3694", 
        "webqsp_question": "what type of money do you use in cuba", 
        "machine_question": "what type of money do you use in the currency used in the country is Cuban peso", 
        "question": "What is the kind of money that one would use in the nation whose currency is the Cuban peso?", 
        "sparql": "PREFIX ns: <http://rdf.freebase.com/ns/>\nSELECT DISTINCT ?x\nWHERE {\nFILTER (?x != ?c)\nFILTER (!isLiteral(?x) OR lang(?x) = '' OR langMatches(lang(?x), 'en'))\n?c ns:location.country.currency_used ns:m.049p2z . \n?c ns:location.country.currency_used ?x .\n}\n", 
        "compositionality_type": "composition", 
        "answers": [
            {
                "answer": "Cuban peso", 
                "answer_id": "m.049p2z", 
                "aliases": []
            }, 
            {
                "answer": "Cuban convertible peso", 
                "answer_id": "m.049p6c", 
                "aliases": [
                    "Chavito"
                ]
            }
        ], 
        "created": "2018-02-13T02:24:15"
    }, 
    {
        "ID": "WebQTrn-2319_5d066fa0939d708dab176e819188e151", 
        "webqsp_ID": "WebQTrn-2319", 
        "webqsp_question": "what is the official language of the ukraine", 
        "machine_question": "what is the official language of the the country that contains Cherkasy Oblast", 
        "question": "People from the country that contains Cherkasy Oblast speak what official language?", 
        "sparql": "PREFIX ns: <http://rdf.freebase.com/ns/>\nSELECT DISTINCT ?x\nWHERE {\nFILTER (?x != ?c)\nFILTER (!isLiteral(?x) OR lang(?x) = '' OR langMatches(lang(?x), 'en'))\n?c ns:location.country.administrative_divisions ns:m.02h81c . \n?c ns:location.country.languages_spoken ?x .\n}\n", 
        "compositionality_type": "composition", 
        "answers": [
            {
                "answer": "Albanian language", 
                "answer_id": "m.012v8", 
                "aliases": [
                    "Albanian"
                ]
            }, 
            {
                "answer": "Tatar Language", 
                "answer_id": "m.019yz7", 
                "aliases": [
                    "Tartar", 
                    "Tata'er", 
                    "Tatar"
                ]
            }, 
            {
                "answer": "Moldovan language", 
                "answer_id": "m.01h2j_", 
                "aliases": [
                    "Moldovan"
                ]
            }, 
            {
                "answer": "Romanian Language", 
                "answer_id": "m.02hxc3j", 
                "aliases": [
                    "Daco-rumanian", 
                    "Rumanian", 
                    "Romanian language", 
                    "Moldavian", 
                    "Daco-romanian", 
                    "Romanian", 
                    "Roumanian", 
                    "Moldavan"
                ]
            }, 
            {
                "answer": "Hungarian language", 
                "answer_id": "m.02ztjwg", 
                "aliases": [
                    "Hungarian Language", 
                    "Magyar", 
                    "Hungarian"
                ]
            }, 
            {
                "answer": "Russian Language", 
                "answer_id": "m.06b_j", 
                "aliases": [
                    "Russian language", 
                    "Russit", 
                    "Eluosi", 
                    "Olossu", 
                    "Russian", 
                    "Russ", 
                    "Russki"
                ]
            }, 
            {
                "answer": "Ukrainian Language", 
                "answer_id": "m.0cjk9", 
                "aliases": [
                    "Ukrayins'ka mova", 
                    "Ukrainian"
                ]
            }
        ], 
        "created": "2018-02-12T23:45:55"
    }, 
    {
        "ID": "WebQTest-855_de764c65ac3c6a870a407dd9cafd0dc9", 
        "webqsp_ID": "WebQTest-855", 
        "webqsp_question": "what is the currency of brazil now", 
        "machine_question": "what is the currency of the currency used in the country is Brazilian real now", 
        "question": "What currency is used in the country that once used the Brazilian Real?", 
        "sparql": "PREFIX ns: <http://rdf.freebase.com/ns/>\nSELECT DISTINCT ?x\nWHERE {\nFILTER (?x != ?c)\nFILTER (!isLiteral(?x) OR lang(?x) = '' OR langMatches(lang(?x), 'en'))\n?c ns:location.country.currency_used ns:m.03385m . \n?c ns:location.country.currency_used ?x .\n}\n", 
        "compositionality_type": "composition", 
        "answers": [
            {
                "answer": "Brazilian real", 
                "answer_id": "m.03385m", 
                "aliases": []
            }
        ], 
        "created": "2018-02-13T04:16:51"
    }, 
    {
        "ID": "WebQTrn-3222_5bbab94cc6dc1cc59a76eb19aed3832f", 
        "webqsp_ID": "WebQTrn-3222", 
        "webqsp_question": "what movies did taylor lautner star in", 
        "machine_question": "what movies did taylor lautner star in and is the film has a charcter named Kate", 
        "question": "What movie with a character named Kate starred Taylor Lautner?", 
        "sparql": "PREFIX ns: <http://rdf.freebase.com/ns/>\nSELECT DISTINCT ?x\nWHERE {\nFILTER (?x != ns:m.07ldhs)\nFILTER (!isLiteral(?x) OR lang(?x) = '' OR langMatches(lang(?x), 'en'))\nns:m.07ldhs ns:film.actor.film ?y .\n?y ns:film.performance.film ?x .\n?x ns:film.film.starring ?c .\n?c ns:film.performance.character ns:g.11h1t_mtf . \n}", 
        "compositionality_type": "conjunction", 
        "answers": [
            {
                "answer": "The Twilight Saga: Breaking Dawn - Part 2", 
                "answer_id": "m.0djz0rc", 
                "aliases": [
                    "Twilight, chapitre V : R\u00e9v\u00e9lation 2e partie", 
                    "The Twilight Saga: Breaking Dawn \u2013 Part 2"
                ]
            }
        ], 
        "created": "2018-02-13T01:28:41"
    }, 
    {
        "ID": "WebQTrn-3209_dacbec08f8d31829038751934850ed95", 
        "webqsp_ID": "WebQTrn-3209", 
        "webqsp_question": "where was george washington originally from", 
        "machine_question": "where was the architect that desinged Mount Vernon originally from", 
        "question": "What is the location of origin for the architect who designed Mount Vernon?", 
        "sparql": "PREFIX ns: <http://rdf.freebase.com/ns/>\nSELECT DISTINCT ?x\nWHERE {\nFILTER (?x != ?c)\nFILTER (!isLiteral(?x) OR lang(?x) = '' OR langMatches(lang(?x), 'en'))\n?c ns:architecture.architect.structures_designed ns:m.013v2f . \n?c ns:people.person.place_of_birth ?x .\n}\n", 
        "compositionality_type": "composition", 
        "answers": [
            {
                "answer": "Westmoreland County", 
                "answer_id": "m.0mmyl", 
                "aliases": []
            }
        ], 
        "created": "2018-02-13T01:27:47"
    }, 
    {
        "ID": "WebQTrn-15_52b2f96821fd61ddb8b4f87c50fc12ef", 
        "webqsp_ID": "WebQTrn-15", 
        "webqsp_question": "what is nina dobrev nationality", 
        "machine_question": "what is nina dobrev nationality and is the population was once less than 8204168", 
        "question": "What country has a population of less than 8204168 and includes Nina Dobrev as someone with the nationality?", 
        "sparql": "PREFIX ns: <http://rdf.freebase.com/ns/>\nSELECT DISTINCT ?x\nWHERE {\nFILTER (?x != ns:m.027nwk2)\nFILTER (!isLiteral(?x) OR lang(?x) = '' OR langMatches(lang(?x), 'en'))\nns:m.027nwk2 ns:people.person.nationality ?x .\n?x ns:location.statistical_region.population ?c .\n?c ns:measurement_unit.dated_integer.number ?num .\nFILTER (xsd:integer(?num) < 8204168) . \n}", 
        "compositionality_type": "comparative", 
        "answers": [
            {
                "answer": "Canada", 
                "answer_id": "m.0d060g", 
                "aliases": [
                    "Dominion of Canada", 
                    "Canuckistan"
                ]
            }, 
            {
                "answer": "Bulgaria", 
                "answer_id": "m.015qh", 
                "aliases": [
                    "Republic of Bulgaria"
                ]
            }
        ], 
        "created": "2018-02-12T19:39:38"
    }, 
    {
        "ID": "WebQTrn-3475_275abff5d62790363fe8bc0387660115", 
        "webqsp_ID": "WebQTrn-3475", 
        "webqsp_question": "where is danish located", 
        "machine_question": "where is the location that appointed Margrethe II of Denmark to govermental position located", 
        "question": "What continent does the country with Margrethe II of Denmark located in?", 
        "sparql": "PREFIX ns: <http://rdf.freebase.com/ns/>\nSELECT DISTINCT ?x\nWHERE {\nFILTER (?x != ?c)\nFILTER (!isLiteral(?x) OR lang(?x) = '' OR langMatches(lang(?x), 'en'))\n?c ns:government.governmental_jurisdiction.governing_officials ?k .\n?k ns:government.government_position_held.appointed_by ns:m.0g2kv . \n?c ns:base.locations.countries.continent ?x .\n}\n", 
        "compositionality_type": "composition", 
        "answers": [
            {
                "answer": "Europe", 
                "answer_id": "m.02j9z", 
                "aliases": [
                    "The Old Continent"
                ]
            }
        ], 
        "created": "2018-02-13T02:00:59"
    }, 
    {
        "ID": "WebQTest-1562_0652d8b1cb95848c9630860c92e38e6f", 
        "webqsp_ID": "WebQTest-1562", 
        "webqsp_question": "what countries constitute the eu", 
        "machine_question": "what countries constitute the eu and the location time zone is Western European Time Zone", 
        "question": "What countries in the EU are located in the Western European Time Zone?", 
        "sparql": "PREFIX ns: <http://rdf.freebase.com/ns/>\nSELECT DISTINCT ?x\nWHERE {\nFILTER (?x != ns:m.0_6t_z8)\nFILTER (!isLiteral(?x) OR lang(?x) = '' OR langMatches(lang(?x), 'en'))\nns:m.0_6t_z8 ns:organization.membership_organization.members ?y .\n?y ns:organization.organization_membership.member ?x .\n?x ns:location.location.time_zones ns:m.02q_y6 . \n}", 
        "compositionality_type": "conjunction", 
        "answers": [
            {
                "answer": "Portugal", 
                "answer_id": "m.05r4w", 
                "aliases": [
                    "Portuguese Republic"
                ]
            }, 
            {
                "answer": "Spain", 
                "answer_id": "m.06mkj", 
                "aliases": [
                    "Kingdom of Spain", 
                    "Espa\u00f1a", 
                    "Furija"
                ]
            }
        ], 
        "created": "2018-02-13T05:34:47"
    }, 
    {
        "ID": "WebQTrn-1780_593bfb1e8da51c4ccd9f768e8f3acd97", 
        "webqsp_ID": "WebQTrn-1780", 
        "webqsp_question": "what language brazil use", 
        "machine_question": "what language the country that contains Rio de Janeiro use", 
        "question": "What language is spoken in the country where Rio de Janerio is?", 
        "sparql": "PREFIX ns: <http://rdf.freebase.com/ns/>\nSELECT DISTINCT ?x\nWHERE {\nFILTER (?x != ?c)\nFILTER (!isLiteral(?x) OR lang(?x) = '' OR langMatches(lang(?x), 'en'))\n?c ns:location.country.administrative_divisions ns:m.01hd4s . \n?c ns:location.country.languages_spoken ?x .\n}\n", 
        "compositionality_type": "composition", 
        "answers": [
            {
                "answer": "Italian Language", 
                "answer_id": "m.02bjrlw", 
                "aliases": [
                    "Italiano", 
                    "Italian"
                ]
            }, 
            {
                "answer": "Brazilian Portuguese", 
                "answer_id": "m.02zj58", 
                "aliases": []
            }, 
            {
                "answer": "Portuguese Language", 
                "answer_id": "m.05zjd", 
                "aliases": [
                    "Portuguese", 
                    "Portugese", 
                    "Portuguese language", 
                    "Portugu\u00eas"
                ]
            }
        ], 
        "created": "2018-02-12T22:49:37"
    }, 
    {
        "ID": "WebQTrn-13_84d6df962005686445c5fddc501288bf", 
        "webqsp_ID": "WebQTrn-13", 
        "webqsp_question": "which countries border the us", 
        "machine_question": "which countries border the us and is the consumer price index was once smallest", 
        "question": "Which country that once had the smallest consumer price index borders the US?", 
        "sparql": "PREFIX ns: <http://rdf.freebase.com/ns/>\nSELECT DISTINCT ?x\nWHERE {\nFILTER (?x != ns:m.09c7w0)\nFILTER (!isLiteral(?x) OR lang(?x) = '' OR langMatches(lang(?x), 'en'))\nns:m.09c7w0 ns:location.location.adjoin_s ?y .\n?y ns:location.adjoining_relationship.adjoins ?x .\n?x ns:common.topic.notable_types ns:m.01mp .\n?x ns:location.statistical_region.consumer_price_index ?c .\n?c ns:measurement_unit.dated_index_value.index_value ?num .\n}\nORDER BY xsd:integer(?num) LIMIT 1", 
        "compositionality_type": "superlative", 
        "answers": [
            {
                "answer": "Mexico", 
                "answer_id": "m.0b90_r", 
                "aliases": [
                    "M\u00e9jico", 
                    "M\u00e9xico", 
                    "Estados Unidos Mexicanos", 
                    "United Mexican States"
                ]
            }
        ], 
        "created": "2018-02-12T19:39:16"
    }, 
    {
        "ID": "WebQTrn-146_f9cd02dcb5758312cf84546f8f617768", 
        "webqsp_ID": "WebQTrn-146", 
        "webqsp_question": "what movie did james frey write", 
        "machine_question": "what movie did james frey write and is the film has a charcter named Jay Murphy", 
        "question": "What film with character named Jay Murphy did Jame Frey write?", 
        "sparql": "PREFIX ns: <http://rdf.freebase.com/ns/>\nSELECT DISTINCT ?x\nWHERE {\nFILTER (?x != ns:m.06w054)\nFILTER (!isLiteral(?x) OR lang(?x) = '' OR langMatches(lang(?x), 'en'))\nns:m.06w054 ns:film.writer.film ?x .\n?x ns:film.film.starring ?c .\n?c ns:film.performance.character ns:m.0h0tjqf . \n}", 
        "compositionality_type": "conjunction", 
        "answers": [
            {
                "answer": "Kissing a Fool", 
                "answer_id": "m.08vh65", 
                "aliases": []
            }
        ], 
        "created": "2018-02-12T19:51:26"
    }, 
    {
        "ID": "WebQTrn-300_83663048963b6f17bea2809dc4d3ba21", 
        "webqsp_ID": "WebQTrn-300", 
        "webqsp_question": "where is the ottoman empire located", 
        "machine_question": "where is the the currency used in the country is Sultani located", 
        "question": "Which currency is used in the country where Sultani, is located?", 
        "sparql": "PREFIX ns: <http://rdf.freebase.com/ns/>\nSELECT DISTINCT ?x\nWHERE {\nFILTER (?x != ?c)\nFILTER (!isLiteral(?x) OR lang(?x) = '' OR langMatches(lang(?x), 'en'))\n?c ns:location.country.currency_used ns:m.0b5zvq . \n?c ns:location.location.containedby ?x .\n}\n", 
        "compositionality_type": "composition", 
        "answers": [
            {
                "answer": "Near East", 
                "answer_id": "m.01ffbn", 
                "aliases": []
            }
        ], 
        "created": "2018-02-12T20:12:09"
    }, 
    {
        "ID": "WebQTrn-1557_26a7885fc5b44e07960d2c427ae7853d", 
        "webqsp_ID": "WebQTrn-1557", 
        "webqsp_question": "where did charles drew go to college", 
        "machine_question": "where did charles drew go to college and is the education institution has a sports team named Columbia Lions men's basketball", 
        "question": "Where did Charles Drew attend college, where the education institution has a sports team titled, the Columbia Lions men's basketball team?", 
        "sparql": "PREFIX ns: <http://rdf.freebase.com/ns/>\nSELECT DISTINCT ?x\nWHERE {\nFILTER (?x != ns:m.018t67)\nFILTER (!isLiteral(?x) OR lang(?x) = '' OR langMatches(lang(?x), 'en'))\nns:m.018t67 ns:people.person.education ?y .\n?y ns:education.education.institution ?x .\n?x ns:common.topic.notable_types ns:m.01y2hnl .\n?x ns:education.educational_institution.sports_teams ns:m.05h0gpw . \n}", 
        "compositionality_type": "conjunction", 
        "answers": [
            {
                "answer": "Columbia University", 
                "answer_id": "m.01w5m", 
                "aliases": [
                    "Columbia University, New York City", 
                    "Columbia U", 
                    "Columbia", 
                    "Columbia University, main campus", 
                    "CU"
                ]
            }
        ], 
        "created": "2018-02-12T22:31:35"
    }, 
    {
        "ID": "WebQTest-1260_8c90d5499a627a3478313407b1404ecf", 
        "webqsp_ID": "WebQTest-1260", 
        "webqsp_question": "what year did baltimore ravens win super bowl", 
        "machine_question": "what year did the team won the 2001 AFC Championship Game championship win super bowl", 
        "question": "In what year did the 2001 AFC Championship Game winners win the Super Bowl?", 
        "sparql": "PREFIX ns: <http://rdf.freebase.com/ns/>\nSELECT DISTINCT ?x\nWHERE {\nFILTER (?x != ?c)\nFILTER (!isLiteral(?x) OR lang(?x) = '' OR langMatches(lang(?x), 'en'))\n?c ns:sports.sports_team.championships ns:m.0_gt_qt . \n?c ns:sports.sports_team.championships ?x .\n?x ns:common.topic.notable_types ns:m.01xljv1 .\n}\n", 
        "compositionality_type": "composition", 
        "answers": [
            {
                "answer": "Super Bowl XXXV", 
                "answer_id": "m.076yq", 
                "aliases": []
            }
        ], 
        "created": "2018-02-13T04:57:17"
    }, 
    {
        "ID": "WebQTest-1874_edd23d2224288f0c28fa3dbc290d7ad9", 
        "webqsp_ID": "WebQTest-1874", 
        "webqsp_question": "who does portugal trade with", 
        "machine_question": "who does portugal trade with and the country capital is Luanda", 
        "question": "Luanda is the capital of which country that trades with Portugal?", 
        "sparql": "#MANUAL SPARQL\nPREFIX ns: <http://rdf.freebase.com/ns/>\nSELECT DISTINCT ?x \nWHERE {\n\tFILTER (?x != ns:m.05r4w)\n\t{ \n\t  ns:m.05r4w ns:location.statistical_region.places_exported_to ?y .\n\t  ?y ns:location.imports_and_exports.exported_to ?x . \n\t}\n\tUNION\n\t{\n\t  ns:m.05r4w ns:location.statistical_region.places_imported_from ?y .\n\t  ?y ns:location.imports_and_exports.imported_from ?x . \n\t}?x ns:location.country.capital ns:m.04nsy . \n}", 
        "compositionality_type": "conjunction", 
        "answers": [
            {
                "answer": "Angola", 
                "answer_id": "m.0j4b", 
                "aliases": []
            }
        ], 
        "created": "2018-02-13T06:13:10"
    }, 
    {
        "ID": "WebQTrn-3090_f7ac69e1e18c33dec6527d5ed425e6e3", 
        "webqsp_ID": "WebQTrn-3090", 
        "webqsp_question": "what university did barack obama attend", 
        "machine_question": "what university did barack obama attend and the educational institution newspaper is Harvard Law Record", 
        "question": "What educational institution with the Harvard Law Record newspaper did Barack Obama supposedly attend?", 
        "sparql": "PREFIX ns: <http://rdf.freebase.com/ns/>\nSELECT DISTINCT ?x\nWHERE {\nFILTER (?x != ns:m.02mjmr)\nFILTER (!isLiteral(?x) OR lang(?x) = '' OR langMatches(lang(?x), 'en'))\nns:m.02mjmr ns:people.person.education ?y .\n?y ns:education.education.institution ?x .\n?x ns:common.topic.notable_types ns:m.01y2hnl .\n?x ns:education.educational_institution.newspaper ns:m.02r0wkp . \n}", 
        "compositionality_type": "conjunction", 
        "answers": [
            {
                "answer": "Harvard Law School", 
                "answer_id": "m.014zws", 
                "aliases": [
                    "Harvard University School of Law", 
                    "Harvard Law School, Cambridge", 
                    "Harvard Law School, main campus", 
                    "Harvard Law"
                ]
            }
        ], 
        "created": "2018-02-13T01:13:39"
    }, 
    {
        "ID": "WebQTrn-1303_496153141015e2276bf542bbf6a99b96", 
        "webqsp_ID": "WebQTrn-1303", 
        "webqsp_question": "what is the name of book written by helen keller", 
        "machine_question": "what is the name of book written by the person education institution is Horace Mann School for the Deaf and Hard of Hearing", 
        "question": "What books were written by the famous person who attended Horace Mann School of the Deaf and Hard of Hearing?", 
        "sparql": "PREFIX ns: <http://rdf.freebase.com/ns/>\nSELECT DISTINCT ?x\nWHERE {\nFILTER (?x != ?c)\nFILTER (!isLiteral(?x) OR lang(?x) = '' OR langMatches(lang(?x), 'en'))\n?c ns:people.person.education ?k .\n?k ns:education.education.institution ns:m.0bydgq . \n?c ns:book.author.works_written ?x .\n?x ns:common.topic.notable_types ns:m.01xryvm .\n}\n", 
        "compositionality_type": "composition", 
        "answers": [
            {
                "answer": "Light in My Darkness", 
                "answer_id": "m.01ct51", 
                "aliases": [
                    "My religion"
                ]
            }, 
            {
                "answer": "The World I Live In", 
                "answer_id": "m.05mms2v", 
                "aliases": []
            }, 
            {
                "answer": "Let us have faith", 
                "answer_id": "m.068vwb6", 
                "aliases": []
            }, 
            {
                "answer": "The open door", 
                "answer_id": "m.06clt38", 
                "aliases": []
            }, 
            {
                "answer": "Peace at eventide", 
                "answer_id": "m.06ct5x4", 
                "aliases": []
            }, 
            {
                "answer": "Helen Keller, her Socialist years", 
                "answer_id": "m.06d40b6", 
                "aliases": []
            }, 
            {
                "answer": "We bereaved", 
                "answer_id": "m.06gm4jn", 
                "aliases": []
            }, 
            {
                "answer": "The faith of Helen Keller", 
                "answer_id": "m.06jh36g", 
                "aliases": []
            }, 
            {
                "answer": "The miracle of life", 
                "answer_id": "m.06l8ytp", 
                "aliases": []
            }, 
            {
                "answer": "Teacher: Anne Sullivan Macy", 
                "answer_id": "m.06qbwkz", 
                "aliases": [
                    "Teacher"
                ]
            }, 
            {
                "answer": "My key of life", 
                "answer_id": "m.06vdh41", 
                "aliases": []
            }, 
            {
                "answer": "The modern woman", 
                "answer_id": "m.0c1t3s9", 
                "aliases": []
            }, 
            {
                "answer": "Optimism", 
                "answer_id": "m.0c1t3sh", 
                "aliases": []
            }, 
            {
                "answer": "Out of the dark", 
                "answer_id": "m.0c1t3sl", 
                "aliases": []
            }, 
            {
                "answer": "The song of the stone wall", 
                "answer_id": "m.0c1t3sp", 
                "aliases": [
                    "The chant of the stone wall"
                ]
            }, 
            {
                "answer": "The Story of My Life", 
                "answer_id": "m.0d4wd9", 
                "aliases": [
                    "The story of my life, with her letters (1887-1901) and a supplementary account of her education"
                ]
            }
        ], 
        "created": "2018-02-12T22:03:13"
    }, 
    {
        "ID": "WebQTrn-2581_a623ff8f34a29832660354c2dd350431", 
        "webqsp_ID": "WebQTrn-2581", 
        "webqsp_question": "who has tim howard played for", 
        "machine_question": "who has tim howard played for and is the team has a team moscot named Fred the red", 
        "question": "Which Football franchise has Fred the red as a mascot and once had Tim Howard playing for them?", 
        "sparql": "PREFIX ns: <http://rdf.freebase.com/ns/>\nSELECT DISTINCT ?x\nWHERE {\nFILTER (?x != ns:m.026s3n)\nFILTER (!isLiteral(?x) OR lang(?x) = '' OR langMatches(lang(?x), 'en'))\nns:m.026s3n ns:sports.pro_athlete.teams ?y .\n?y ns:sports.sports_team_roster.team ?x .\n?x ns:sports.sports_team.team_mascot ns:m.02nsyh9 . \n}", 
        "compositionality_type": "conjunction", 
        "answers": [
            {
                "answer": "Manchester United F.C.", 
                "answer_id": "m.050fh", 
                "aliases": [
                    "Manchester United", 
                    "Manchester United Football Club", 
                    "Man Utd", 
                    "Manchester United FC", 
                    "Newton Heath LYR Football Club", 
                    "Man United", 
                    "The Red Devils"
                ]
            }
        ], 
        "created": "2018-02-13T00:14:23"
    }, 
    {
        "ID": "WebQTrn-1447_3ddebccd2bc6ca94db705da1bf605e93", 
        "webqsp_ID": "WebQTrn-1447", 
        "webqsp_question": "who did the cleveland browns draft", 
        "machine_question": "who did the the organiztion leadership has a person named Joe Banner draft", 
        "question": "What players were selected in the draft by the organization that has someone named Joe Banner in its leadership?", 
        "sparql": "PREFIX ns: <http://rdf.freebase.com/ns/>\nSELECT DISTINCT ?x\nWHERE {\nFILTER (?x != ?c)\nFILTER (!isLiteral(?x) OR lang(?x) = '' OR langMatches(lang(?x), 'en'))\n?c ns:organization.organization.leadership ?k .\n?k ns:organization.leadership.person ns:m.0266jkp . \n?c ns:sports.professional_sports_team.draft_picks ?y .\n?y ns:sports.sports_league_draft_pick.player ?x .\n}\n", 
        "compositionality_type": "composition", 
        "answers": [
            {
                "answer": "Kellen Winslow II", 
                "answer_id": "m.03tt9p", 
                "aliases": [
                    "Kellen Boswell Winslow, Jr.", 
                    "Shash", 
                    "Kellen Boswell Winslow", 
                    "Kellen Winslow"
                ]
            }, 
            {
                "answer": "Braylon Edwards", 
                "answer_id": "m.05byjc", 
                "aliases": [
                    "Braylon Jamel Edwards"
                ]
            }, 
            {
                "answer": "Trent Richardson", 
                "answer_id": "m.076vn8w", 
                "aliases": []
            }, 
            {
                "answer": "Brady Quinn", 
                "answer_id": "m.08gf9t", 
                "aliases": [
                    "Brayden Tyler Quinn", 
                    "brady_quinn"
                ]
            }, 
            {
                "answer": "Jeff Faine", 
                "answer_id": "m.0bdv4h", 
                "aliases": [
                    "Jeffrey Kalei Faine"
                ]
            }, 
            {
                "answer": "Kamerion Wimbley", 
                "answer_id": "m.0cwfp6", 
                "aliases": []
            }, 
            {
                "answer": "Ryan Miller", 
                "answer_id": "m.0dljy80", 
                "aliases": []
            }, 
            {
                "answer": "Joe Thomas", 
                "answer_id": "m.0fjtlw", 
                "aliases": [
                    "Joseph Thomas"
                ]
            }, 
            {
                "answer": "Justin Gilbert", 
                "answer_id": "m.0h_5dlc", 
                "aliases": []
            }, 
            {
                "answer": "Johnny Manziel", 
                "answer_id": "m.0n45_f7", 
                "aliases": [
                    "Jonathan Paul Manziel", 
                    "Johnny Football", 
                    "Johnny Cleveland"
                ]
            }, 
            {
                "answer": "Terrance West", 
                "answer_id": "m.0xnbrpw", 
                "aliases": []
            }
        ], 
        "created": "2018-02-12T22:18:56"
    }, 
    {
        "ID": "WebQTrn-3512_ce510e68a4bda7735a08d32e31409acb", 
        "webqsp_ID": "WebQTrn-3512", 
        "webqsp_question": "who was vice president under lincoln", 
        "machine_question": "who was vice president under lincoln and held his govermental position from 1843-03-04", 
        "question": "Who was the vice president under Lincoln, that held a governmental position starting in March 4, 1843?", 
        "sparql": "PREFIX ns: <http://rdf.freebase.com/ns/>\nSELECT DISTINCT ?x\nWHERE {\nFILTER (?x != ns:m.0gzh)\nFILTER (!isLiteral(?x) OR lang(?x) = '' OR langMatches(lang(?x), 'en'))\nns:m.0gzh ns:government.us_president.vice_president ?x .\n?x ns:government.politician.government_positions_held ?c .\n?c ns:government.government_position_held.from \"1843-03-04\"^^xsd:dateTime . \n}", 
        "compositionality_type": "conjunction", 
        "answers": [
            {
                "answer": "Andrew Johnson", 
                "answer_id": "m.0rmg", 
                "aliases": [
                    "Andy Johnson"
                ]
            }
        ], 
        "created": "2018-02-13T02:07:35"
    }, 
    {
        "ID": "WebQTrn-934_a7c9de4c20d55186473643782dfa2e76", 
        "webqsp_ID": "WebQTrn-934", 
        "webqsp_question": "who was the general for the british in the revolutionary war", 
        "machine_question": "who was the general for the british in the revolutionary war and held his govermental position from before 1786-09-12", 
        "question": "Who was the British General in the revolutionary war that had his position before 9-12-1786?", 
        "sparql": "PREFIX ns: <http://rdf.freebase.com/ns/>\nSELECT DISTINCT ?x\nWHERE {\nFILTER (?x != ns:m.0jnh)\nFILTER (!isLiteral(?x) OR lang(?x) = '' OR langMatches(lang(?x), 'en'))\nns:m.0jnh ns:military.military_conflict.commanders ?y .\n?y ns:military.military_command.military_commander ?x .\n?x ns:people.person.nationality ns:m.014tss .\n?x ns:government.politician.government_positions_held ?c .\n?c ns:government.government_position_held.from ?num .\nFILTER (?num < \"1786-09-12\"^^xsd:dateTime) . \n}", 
        "compositionality_type": "comparative", 
        "answers": [
            {
                "answer": "Charles Cornwallis, 1st Marquess Cornwallis", 
                "answer_id": "m.09jrf", 
                "aliases": []
            }
        ], 
        "created": "2018-02-12T21:22:01"
    }, 
    {
        "ID": "WebQTrn-1212_ba40191f4fd53be3111628e5e044244e", 
        "webqsp_ID": "WebQTrn-1212", 
        "webqsp_question": "what political system does russia use", 
        "machine_question": "what political system does the country that contains Moscow use", 
        "question": "What is Moscow's country political system?", 
        "sparql": "PREFIX ns: <http://rdf.freebase.com/ns/>\nSELECT DISTINCT ?x\nWHERE {\nFILTER (?x != ?c)\nFILTER (!isLiteral(?x) OR lang(?x) = '' OR langMatches(lang(?x), 'en'))\n?c ns:location.country.administrative_divisions ns:m.04swd . \n?c ns:location.country.form_of_government ?x .\n}\n", 
        "compositionality_type": "composition", 
        "answers": [
            {
                "answer": "Semi-presidential system", 
                "answer_id": "m.01dw03", 
                "aliases": [
                    "Semi-presidential"
                ]
            }, 
            {
                "answer": "Constitutional republic", 
                "answer_id": "m.0c9rw5", 
                "aliases": [
                    "Constitutional"
                ]
            }, 
            {
                "answer": "Federal republic", 
                "answer_id": "m.0j729", 
                "aliases": [
                    "Federal"
                ]
            }
        ], 
        "created": "2018-02-12T21:54:36"
    }, 
    {
        "ID": "WebQTest-1458_63c386fac6aa2450454404d39bd6c3a4", 
        "webqsp_ID": "WebQTest-1458", 
        "webqsp_question": "who owns chrysler corporation 2011", 
        "machine_question": "who owns the child organization is Chrysler Canada 2011", 
        "question": "Chrysler Canada 2011 is an organization owned by whom?", 
        "sparql": "PREFIX ns: <http://rdf.freebase.com/ns/>\nSELECT DISTINCT ?x\nWHERE {\nFILTER (?x != ?c)\nFILTER (!isLiteral(?x) OR lang(?x) = '' OR langMatches(lang(?x), 'en'))\n?c ns:organization.organization.child ?k .\n?k ns:organization.organization_relationship.child ns:m.02cvzz . \n?c ns:organization.organization.parent ?y .\n?y ns:organization.organization_relationship.parent ?x .\nFILTER(NOT EXISTS {?y ns:organization.organization_relationship.to ?sk0} || \nEXISTS {?y ns:organization.organization_relationship.to ?sk1 . \nFILTER(xsd:datetime(?sk1) >= \"2011-01-01\"^^xsd:dateTime) })\nFILTER(NOT EXISTS {?y ns:organization.organization_relationship.from ?sk2} || \nEXISTS {?y ns:organization.organization_relationship.from ?sk3 . \nFILTER(xsd:datetime(?sk3) <= \"2011-12-31\"^^xsd:dateTime) })\n}\n", 
        "compositionality_type": "composition", 
        "answers": [
            {
                "answer": "Fiat Chrysler Automobiles", 
                "answer_id": "m.0_gywj9", 
                "aliases": []
            }, 
            {
                "answer": "Federal government of the United States", 
                "answer_id": "m.01bqks", 
                "aliases": [
                    "U.S. government", 
                    "managing organization for the United States", 
                    "US Government", 
                    "American Government", 
                    "the United States's government", 
                    "United States: Federal Government", 
                    "United States", 
                    "US Federal government", 
                    "Federal Government", 
                    "United States government", 
                    "United States Federal Government"
                ]
            }, 
            {
                "answer": "Government of Canada", 
                "answer_id": "m.02wz7x", 
                "aliases": [
                    "Canada", 
                    "Canadian government"
                ]
            }, 
            {
                "answer": "Voluntary Employee Beneficiary Association", 
                "answer_id": "m.03c40gm", 
                "aliases": []
            }, 
            {
                "answer": "Fiat S.p.A.", 
                "answer_id": "m.0c7mv", 
                "aliases": [
                    "Societ\u00e0 Anonima Fabbrica Italiana Automobili Torino", 
                    "Fiat SpA", 
                    "Fabbrica Italiana Automobili Torino", 
                    "Fiat S.p.A."
                ]
            }
        ], 
        "created": "2018-02-13T05:22:49"
    }, 
    {
        "ID": "WebQTrn-2944_91fbb9146e3addbb313ff7ead5eb51f8", 
        "webqsp_ID": "WebQTrn-2944", 
        "webqsp_question": "what country is barack obama from", 
        "machine_question": "what country is the person education institution is State Elementary School Menteng 01 from", 
        "question": "What is the native country for the celebrity who is an alumni of State Elementary School Menteng 01?", 
        "sparql": "PREFIX ns: <http://rdf.freebase.com/ns/>\nSELECT DISTINCT ?x\nWHERE {\nFILTER (?x != ?c)\nFILTER (!isLiteral(?x) OR lang(?x) = '' OR langMatches(lang(?x), 'en'))\n?c ns:people.person.education ?k .\n?k ns:education.education.institution ns:m.0280qps . \n?c ns:people.person.nationality ?x .\n}\n", 
        "compositionality_type": "composition", 
        "answers": [
            {
                "answer": "United States of America", 
                "answer_id": "m.09c7w0", 
                "aliases": [
                    "U.S. of A.", 
                    "Estats Units d'Am\u00e8rica", 
                    "USA", 
                    "U.S.A.", 
                    "U.S.", 
                    "The States", 
                    "US", 
                    "United States", 
                    "America"
                ]
            }
        ], 
        "created": "2018-02-13T00:56:04"
    }, 
    {
        "ID": "WebQTrn-3129_52deecbffa5c67b0c724c84174c5e019", 
        "webqsp_ID": "WebQTrn-3129", 
        "webqsp_question": "what is the political system in argentina", 
        "machine_question": "what is the political system in the religious organization leadeship is Society of Jesus", 
        "question": "What is the political system of the country with Society of Jesus?", 
        "sparql": "PREFIX ns: <http://rdf.freebase.com/ns/>\nSELECT DISTINCT ?x\nWHERE {\nFILTER (?x != ?c)\nFILTER (!isLiteral(?x) OR lang(?x) = '' OR langMatches(lang(?x), 'en'))\n?c ns:religion.religious_leadership_jurisdiction.leader ?k .\n?k ns:religion.religious_organization_leadership.organization ns:m.04399 . \n?c ns:location.country.form_of_government ?x .\n}\n", 
        "compositionality_type": "composition", 
        "answers": [
            {
                "answer": "Presidential system", 
                "answer_id": "m.01d9r3", 
                "aliases": [
                    "Presidential"
                ]
            }, 
            {
                "answer": "Constitutional republic", 
                "answer_id": "m.0c9rw5", 
                "aliases": [
                    "Constitutional"
                ]
            }, 
            {
                "answer": "Representative democracy", 
                "answer_id": "m.0drnm", 
                "aliases": []
            }, 
            {
                "answer": "Federal republic", 
                "answer_id": "m.0j729", 
                "aliases": [
                    "Federal"
                ]
            }
        ], 
        "created": "2018-02-13T01:16:50"
    }, 
    {
        "ID": "WebQTrn-213_46c6ca7017590cde5fcb0d989cc64df6", 
        "webqsp_ID": "WebQTrn-213", 
        "webqsp_question": "what are the 2 conferences in the nfl", 
        "machine_question": "what are the 2 conferences in the the child organization is NFL Digital Media", 
        "question": "What are the two conferences named in the sports league that inlcudes NFL didgital media as a part of their business?", 
        "sparql": "PREFIX ns: <http://rdf.freebase.com/ns/>\nSELECT DISTINCT ?x\nWHERE {\nFILTER (?x != ?c)\nFILTER (!isLiteral(?x) OR lang(?x) = '' OR langMatches(lang(?x), 'en'))\n?c ns:organization.organization.child ?k .\n?k ns:organization.organization_relationship.child ns:m.0101b9j1 . \n?c ns:organization.organization.child ?y .\n?y ns:organization.organization_relationship.child ?x .\n?x ns:common.topic.notable_types ns:m.025dnr9 .\n}\n", 
        "compositionality_type": "composition", 
        "answers": [
            {
                "answer": "National Football Conference", 
                "answer_id": "m.01ddqt", 
                "aliases": [
                    "NFC"
                ]
            }, 
            {
                "answer": "American Football Conference", 
                "answer_id": "m.0hh4", 
                "aliases": [
                    "AFC"
                ]
            }
        ], 
        "created": "2018-02-12T20:00:44"
    }, 
    {
        "ID": "WebQTrn-493_85f381b8012b4def553954906bc9fafb", 
        "webqsp_ID": "WebQTrn-493", 
        "webqsp_question": "where is belgium at", 
        "machine_question": "where is the country capital is City of Brussels at", 
        "question": "Where is the capital City of Brussels located at?", 
        "sparql": "PREFIX ns: <http://rdf.freebase.com/ns/>\nSELECT DISTINCT ?x\nWHERE {\nFILTER (?x != ?c)\nFILTER (!isLiteral(?x) OR lang(?x) = '' OR langMatches(lang(?x), 'en'))\n?c ns:location.country.capital ns:m.02rnbv . \n?c ns:location.location.containedby ?x .\n}\n", 
        "compositionality_type": "composition", 
        "answers": [
            {
                "answer": "Europe", 
                "answer_id": "m.02j9z", 
                "aliases": [
                    "The Old Continent"
                ]
            }, 
            {
                "answer": "Eurasia", 
                "answer_id": "m.02qkt", 
                "aliases": []
            }, 
            {
                "answer": "Western Europe", 
                "answer_id": "m.0852h", 
                "aliases": []
            }
        ], 
        "created": "2018-02-12T20:35:40"
    }, 
    {
        "ID": "WebQTest-577_223fc5c03b0364d071544df753bfc613", 
        "webqsp_ID": "WebQTest-577", 
        "webqsp_question": "where did derek fisher go to college", 
        "machine_question": "where did derek fisher go to college and is the education institution has a sports team named Arkansas Razorbacks football", 
        "question": "What college did Derek Fisher attend that has a team called Arkansas Razorbacks football?", 
        "sparql": "PREFIX ns: <http://rdf.freebase.com/ns/>\nSELECT DISTINCT ?x\nWHERE {\nFILTER (?x != ns:m.04lvwk)\nFILTER (!isLiteral(?x) OR lang(?x) = '' OR langMatches(lang(?x), 'en'))\nns:m.04lvwk ns:people.person.education ?y .\n?y ns:education.education.institution ?x .\n?x ns:common.topic.notable_types ns:m.01y2hnl .\n?x ns:education.educational_institution.sports_teams ns:m.03hfx6c . \n}", 
        "compositionality_type": "conjunction", 
        "answers": [
            {
                "answer": "University of Arkansas", 
                "answer_id": "m.01rc6f", 
                "aliases": [
                    "University of Arkansas, main campus", 
                    "University of Arkansas, Fayetteville", 
                    "U of A"
                ]
            }
        ], 
        "created": "2018-02-13T03:48:04"
    }, 
    {
        "ID": "WebQTrn-2188_b46c584ce204edad2e6740c2f496d7f4", 
        "webqsp_ID": "WebQTrn-2188", 
        "webqsp_question": "what are the basic beliefs of islam religion", 
        "machine_question": "what are the basic beliefs of the religion notable figure is Ali religion", 
        "question": "What are the main beliefs of the religion that has Ali as a figure?", 
        "sparql": "PREFIX ns: <http://rdf.freebase.com/ns/>\nSELECT DISTINCT ?x\nWHERE {\nFILTER (?x != ?c)\nFILTER (!isLiteral(?x) OR lang(?x) = '' OR langMatches(lang(?x), 'en'))\n?c ns:religion.religion.notable_figures ns:m.024c1p . \n?c ns:religion.religion.beliefs ?x .\n}\n", 
        "compositionality_type": "composition", 
        "answers": [
            {
                "answer": "Mahdi", 
                "answer_id": "m.019vqj", 
                "aliases": [
                    "Imam Mahdi"
                ]
            }, 
            {
                "answer": "Tawhid", 
                "answer_id": "m.01bbmp", 
                "aliases": []
            }, 
            {
                "answer": "Prophets in Islam", 
                "answer_id": "m.024b22", 
                "aliases": [
                    "Muhammad"
                ]
            }, 
            {
                "answer": "Predestination in Islam", 
                "answer_id": "m.025w817", 
                "aliases": []
            }, 
            {
                "answer": "Entering Heaven alive", 
                "answer_id": "m.02wvcg4", 
                "aliases": []
            }, 
            {
                "answer": "Monotheism", 
                "answer_id": "m.04xy3", 
                "aliases": []
            }, 
            {
                "answer": "Islamic view of angels", 
                "answer_id": "m.0698fs", 
                "aliases": []
            }, 
            {
                "answer": "Qiyamah", 
                "answer_id": "m.06rvp0", 
                "aliases": []
            }, 
            {
                "answer": "Sharia", 
                "answer_id": "m.074hw", 
                "aliases": []
            }, 
            {
                "answer": "Masih ad-Dajjal", 
                "answer_id": "m.07bfrc", 
                "aliases": [
                    "Dajjal"
                ]
            }, 
            {
                "answer": "Islamic holy books", 
                "answer_id": "m.07r6vw", 
                "aliases": []
            }, 
            {
                "answer": "God in Islam", 
                "answer_id": "m.09kb_2", 
                "aliases": []
            }, 
            {
                "answer": "\u1e6c\u016bb\u0101", 
                "answer_id": "m.0hr6vbp", 
                "aliases": []
            }
        ], 
        "created": "2018-02-12T23:32:31"
    }, 
    {
        "ID": "WebQTrn-3436_27851df42586f160f7dbb1695180249c", 
        "webqsp_ID": "WebQTrn-3436", 
        "webqsp_question": "where is located cornell university", 
        "machine_question": "where is located the education institution has a grad student named Robert Harold Ogle", 
        "question": "What is the location of the school where Robert Harold Ogle is a grad student?", 
        "sparql": "PREFIX ns: <http://rdf.freebase.com/ns/>\nSELECT DISTINCT ?x\nWHERE {\nFILTER (?x != ?c)\nFILTER (!isLiteral(?x) OR lang(?x) = '' OR langMatches(lang(?x), 'en'))\n?c ns:education.educational_institution.students_graduates ?k .\n?k ns:education.education.student ns:m.09q5yb . \n?c ns:organization.organization.headquarters ?y .\n?y ns:location.mailing_address.citytown ?x .\n}\n", 
        "compositionality_type": "composition", 
        "answers": [
            {
                "answer": "Ithaca", 
                "answer_id": "m.03v_5", 
                "aliases": [
                    "Ithaca city", 
                    "City of Ithaca", 
                    "Ithaca, New York", 
                    "Tompkins County / Ithaca city"
                ]
            }
        ], 
        "created": "2018-02-13T01:55:29"
    }, 
    {
        "ID": "WebQTest-85_d09356e80530e2bbb59a3f979a121069", 
        "webqsp_ID": "WebQTest-85", 
        "webqsp_question": "who are the colorado representatives", 
        "machine_question": "who are the the us state that has a capital named Denver representatives", 
        "question": "Who are the representatives from the state whose capital is Denver?", 
        "sparql": "PREFIX ns: <http://rdf.freebase.com/ns/>\nSELECT DISTINCT ?x\nWHERE {\nFILTER (?x != ?c)\nFILTER (!isLiteral(?x) OR lang(?x) = '' OR langMatches(lang(?x), 'en'))\n?c ns:location.us_state.capital ns:m.02cl1 . \n?c ns:government.political_district.representatives ?y .\n?y ns:government.government_position_held.office_holder ?x .\nFILTER(NOT EXISTS {?y ns:government.government_position_held.from ?sk0} || \nEXISTS {?y ns:government.government_position_held.from ?sk1 . \nFILTER(xsd:datetime(?sk1) <= \"2015-08-10\"^^xsd:dateTime) })\nFILTER(NOT EXISTS {?y ns:government.government_position_held.to ?sk2} || \nEXISTS {?y ns:government.government_position_held.to ?sk3 . \nFILTER(xsd:datetime(?sk3) >= \"2015-08-10\"^^xsd:dateTime) })\n}\n", 
        "compositionality_type": "composition", 
        "answers": [
            {
                "answer": "Mark Udall", 
                "answer_id": "m.024zbx", 
                "aliases": [
                    "Rep. Mark Udall", 
                    "Sen. Mark Udall", 
                    "Mark Emery Udall"
                ]
            }, 
            {
                "answer": "Michael Bennet", 
                "answer_id": "m.05b60qf", 
                "aliases": []
            }
        ], 
        "created": "2018-02-13T02:45:11"
    }, 
    {
        "ID": "WebQTest-178_807376f0487b5493fd4c26724ab47a55", 
        "webqsp_ID": "WebQTest-178", 
        "webqsp_question": "who was the leader of the us during wwii", 
        "machine_question": "who was the leader of the us during wwii and held his govermental position from 1911-01-01", 
        "question": "Who was the leader of the US during WWII that was in the government since 1-1-1911?", 
        "sparql": "#MANUAL SPARQL\nPREFIX ns: <http://rdf.freebase.com/ns/>\nSELECT DISTINCT ?x\nWHERE {\n  ns:m.081pw ns:time.event.start_date ?start ;\n             ns:time.event.end_date ?end .\n  ?x ns:government.politician.government_positions_held  ?y .\n  ?y ns:government.government_position_held.office_position_or_title ns:m.060d2 ; # President of the United States\n     ns:government.government_position_held.from  ?from ;\n     ns:government.government_position_held.to  ?to .\n  FILTER (?from < ?end)\n  FILTER (?to > ?start)?x ns:government.politician.government_positions_held ?c .\n?c ns:government.government_position_held.from \"1911-01-01\"^^xsd:dateTime . \n}", 
        "compositionality_type": "conjunction", 
        "answers": [
            {
                "answer": "Franklin D. Roosevelt", 
                "answer_id": "m.02yy8", 
                "aliases": [
                    "The Sphinx", 
                    "President Roosevelt", 
                    "That Man In the White House", 
                    "Franklin D Roosevelt", 
                    "Houdini In the White House", 
                    "Franlin D. Roosevelt", 
                    "Pres. Franklin D. Roosevelt", 
                    "The Squire of Hyde Park", 
                    "F.D.R.", 
                    "FDR", 
                    "Franklin Roosevelt", 
                    "President Franklin Delano Roosevelt", 
                    "President Franklin D. Roosevelt", 
                    "Delano Roosevelt", 
                    "Franklin Delano Roosevelt", 
                    "Franklin D. Rossevelt"
                ]
            }
        ], 
        "created": "2018-02-13T02:53:29"
    }, 
    {
        "ID": "WebQTrn-2117_c4a4d1b444e9f0b28e960a3c1f7717ac", 
        "webqsp_ID": "WebQTrn-2117", 
        "webqsp_question": "what types of government does china have", 
        "machine_question": "what types of government does the location that appointed National People's Congress to govermental position have", 
        "question": "What type of government does the country with National People's Congress  have?", 
        "sparql": "PREFIX ns: <http://rdf.freebase.com/ns/>\nSELECT DISTINCT ?x\nWHERE {\nFILTER (?x != ?c)\nFILTER (!isLiteral(?x) OR lang(?x) = '' OR langMatches(lang(?x), 'en'))\n?c ns:government.governmental_jurisdiction.governing_officials ?k .\n?k ns:government.government_position_held.appointed_by ns:m.0c3xm . \n?c ns:location.country.form_of_government ?x .\n}\n", 
        "compositionality_type": "composition", 
        "answers": [
            {
                "answer": "Communist state", 
                "answer_id": "m.01fkst", 
                "aliases": [
                    "Communist"
                ]
            }, 
            {
                "answer": "Socialist state", 
                "answer_id": "m.025tbxf", 
                "aliases": [
                    "Socialist", 
                    "Socialist Republic"
                ]
            }, 
            {
                "answer": "Single-party state", 
                "answer_id": "m.0py4y", 
                "aliases": [
                    "Single-party"
                ]
            }
        ], 
        "created": "2018-02-12T23:25:03"
    }, 
    {
        "ID": "WebQTrn-2814_0c7d6d924e1144e3a8b992486ad37c01", 
        "webqsp_ID": "WebQTrn-2814", 
        "webqsp_question": "who is the head coach of the chicago blackhawks", 
        "machine_question": "who is the head coach of the the sports team owner is Rocky Wirtz", 
        "question": "Sports team owner Rocky Wirtz has who as his team's head coach?", 
        "sparql": "PREFIX ns: <http://rdf.freebase.com/ns/>\nSELECT DISTINCT ?x\nWHERE {\nFILTER (?x != ?c)\nFILTER (!isLiteral(?x) OR lang(?x) = '' OR langMatches(lang(?x), 'en'))\n?c ns:sports.professional_sports_team.owner_s ns:m.03cb8z2 . \n?c ns:ice_hockey.hockey_team.coach ?x .\n}\n", 
        "compositionality_type": "composition", 
        "answers": [
            {
                "answer": "Joel Quenneville", 
                "answer_id": "m.03clfy", 
                "aliases": []
            }
        ], 
        "created": "2018-02-13T00:43:39"
    }, 
    {
        "ID": "WebQTrn-1812_44d4964f4e16261cfe6c13dd035f3366", 
        "webqsp_ID": "WebQTrn-1812", 
        "webqsp_question": "what countries are in the caribbean", 
        "machine_question": "what countries are in the caribbean and the country capital is Marigot", 
        "question": "What country in the Caribbean has the capital of Marigot?", 
        "sparql": "PREFIX ns: <http://rdf.freebase.com/ns/>\nSELECT DISTINCT ?x\nWHERE {\nFILTER (?x != ns:m.0261m)\nFILTER (!isLiteral(?x) OR lang(?x) = '' OR langMatches(lang(?x), 'en'))\nns:m.0261m ns:location.location.contains ?x .\n?x ns:common.topic.notable_types ns:m.01mp .\n?x ns:location.country.capital ns:m.027vnx1 . \n}", 
        "compositionality_type": "conjunction", 
        "answers": [
            {
                "answer": "Collectivity of Saint Martin", 
                "answer_id": "m.02phy_9", 
                "aliases": [
                    "St. Martin"
                ]
            }
        ], 
        "created": "2018-02-12T22:53:34"
    }, 
    {
        "ID": "WebQTrn-2286_c50692abbec1a95d4299ce10c9e531eb", 
        "webqsp_ID": "WebQTrn-2286", 
        "webqsp_question": "where is kentucky located", 
        "machine_question": "where is kentucky located and is the country that contains Puerto Rico", 
        "question": "What country contains Kentucky and Puerto Rico?", 
        "sparql": "PREFIX ns: <http://rdf.freebase.com/ns/>\nSELECT DISTINCT ?x\nWHERE {\nFILTER (?x != ns:m.0498y)\nFILTER (!isLiteral(?x) OR lang(?x) = '' OR langMatches(lang(?x), 'en'))\nns:m.0498y ns:location.location.containedby ?x .\n?x ns:location.country.administrative_divisions ns:m.05r7t . \n}", 
        "compositionality_type": "conjunction", 
        "answers": [
            {
                "answer": "United States, with Territories", 
                "answer_id": "m.0hzc9m5", 
                "aliases": []
            }
        ], 
        "created": "2018-02-12T23:43:08"
    }, 
    {
        "ID": "WebQTrn-1369_b2456a4b0dffeff28e48e4f1211e363e", 
        "webqsp_ID": "WebQTrn-1369", 
        "webqsp_question": "who is lamar odom playing for in 2012", 
        "machine_question": "who is lamar odom playing for in 2012 and is the team has a team moscot named Mavs Man", 
        "question": "What team whose mascot is Mavs Man had Lamar Odom as a player in 2012?", 
        "sparql": "PREFIX ns: <http://rdf.freebase.com/ns/>\nSELECT DISTINCT ?x\nWHERE {\nFILTER (?x != ns:m.02_nkp)\nFILTER (!isLiteral(?x) OR lang(?x) = '' OR langMatches(lang(?x), 'en'))\nns:m.02_nkp ns:sports.pro_athlete.teams ?y .\n?y ns:sports.sports_team_roster.team ?x .\nFILTER(NOT EXISTS {?y ns:sports.sports_team_roster.from ?sk0} || \nEXISTS {?y ns:sports.sports_team_roster.from ?sk1 . \nFILTER(xsd:datetime(?sk1) <= \"2012-12-31\"^^xsd:dateTime) })\nFILTER(NOT EXISTS {?y ns:sports.sports_team_roster.to ?sk2} || \nEXISTS {?y ns:sports.sports_team_roster.to ?sk3 . \nFILTER(xsd:datetime(?sk3) >= \"2012-01-01\"^^xsd:dateTime) })\n?x ns:sports.sports_team.team_mascot ns:m.052tn3b . \n}", 
        "compositionality_type": "conjunction", 
        "answers": [
            {
                "answer": "Dallas Mavericks", 
                "answer_id": "m.0jmcv", 
                "aliases": [
                    "Mavs", 
                    "Mavericks"
                ]
            }
        ], 
        "created": "2018-02-12T22:10:37"
    }, 
    {
        "ID": "WebQTrn-1881_39b12d0bd9a41783eba6983878bd47a0", 
        "webqsp_ID": "WebQTrn-1881", 
        "webqsp_question": "what are the holidays of islam", 
        "machine_question": "what are the holidays of the religion text is Quran", 
        "question": "The religious text Quran has what holidays?", 
        "sparql": "PREFIX ns: <http://rdf.freebase.com/ns/>\nSELECT DISTINCT ?x\nWHERE {\nFILTER (?x != ?c)\nFILTER (!isLiteral(?x) OR lang(?x) = '' OR langMatches(lang(?x), 'en'))\n?c ns:religion.religion.texts ns:m.096tx . \n?c ns:religion.religion.holidays ?x .\n}\n", 
        "compositionality_type": "composition", 
        "answers": [
            {
                "answer": "Eid al-Fitr Eve", 
                "answer_id": "m.0_tkhhs", 
                "aliases": []
            }, 
            {
                "answer": "Eid-Ul-Adha Eve", 
                "answer_id": "m.0_tkryk", 
                "aliases": []
            }, 
            {
                "answer": "Eid al-Adha", 
                "answer_id": "m.01_403", 
                "aliases": [
                    "bakra eid", 
                    "Greater Eid", 
                    "eid al adha", 
                    "bakr-id", 
                    "Eid ul-adha", 
                    "id eladha", 
                    "3ed el adha", 
                    "eid aladha", 
                    "Eid-al-adha", 
                    "Id el adha", 
                    "3eed el adha", 
                    "id uladha", 
                    "3id el adha", 
                    "The Festival of Sacrifice", 
                    "Kurban Bayram\u0131", 
                    "3eed eladha", 
                    "eid el adha", 
                    "3ed eladha", 
                    "3ed elad7a", 
                    "3eed elad7a", 
                    "eid adha", 
                    "Sacrifice Feast", 
                    "3eed el ad7a", 
                    "3id elad7a", 
                    "3ed el ad7a", 
                    "eid ul adha", 
                    "Feast of Sacrifice", 
                    "eid eladha", 
                    "id aladha", 
                    "Festival of Sacrifice", 
                    "id al adha", 
                    "3id eladha", 
                    "3id el ad7a", 
                    "Id-ul-adha", 
                    "Id al-adha", 
                    "id ul adha", 
                    "eid uladha", 
                    "bakrid", 
                    "bakrid eid", 
                    "Eid el-adha"
                ]
            }, 
            {
                "answer": "Lailat al Mi'raj", 
                "answer_id": "m.0114y4k_", 
                "aliases": []
            }, 
            {
                "answer": "Nuzul Al-Quran", 
                "answer_id": "m.011njw8h", 
                "aliases": []
            }, 
            {
                "answer": "Eid al-Fitr", 
                "answer_id": "m.0148n3", 
                "aliases": [
                    "3ed elfitr", 
                    "eid alfitr", 
                    "3ed el fitr", 
                    "3id elfiter", 
                    "3id elfitr", 
                    "eid ul fitr", 
                    "id elfitr", 
                    "id al fiter", 
                    "eid al fitr", 
                    "id ul fiter", 
                    "eid ulfiter", 
                    "id alfitr", 
                    "3eed el fiter", 
                    "3eed elfitr", 
                    "id elfiter", 
                    "eid ulfitr", 
                    "Eid-al-Fitr", 
                    "eid al fiter", 
                    "Id al-Fitr", 
                    "eid fitr", 
                    "Id-ul-Fitr", 
                    "id alfiter", 
                    "id el fiter", 
                    "eid elfiter", 
                    "3eed elfiter", 
                    "3id el fitr", 
                    "id ulfiter", 
                    "Eid ul-Fitr", 
                    "eid el fitr", 
                    "3id el fiter", 
                    "3ed el fiter", 
                    "eid alfiter", 
                    "\u012adu l-Fi\u1e6dr", 
                    "eid ul fiter", 
                    "3ed elfiter", 
                    "3eed el fitr", 
                    "eid", 
                    "Hari Raya Aidilfitri", 
                    "eid el fiter", 
                    "id ulfitr"
                ]
            }, 
            {
                "answer": "Day of Arafat", 
                "answer_id": "m.027cs49", 
                "aliases": [
                    "Day of Arafa", 
                    "Arafa day", 
                    "Arafat day"
                ]
            }, 
            {
                "answer": "Day of Ashura", 
                "answer_id": "m.02gk03", 
                "aliases": []
            }, 
            {
                "answer": "Mourning of Muharram", 
                "answer_id": "m.03clhwf", 
                "aliases": []
            }, 
            {
                "answer": "Laylat al-Qadr", 
                "answer_id": "m.04b4l4", 
                "aliases": [
                    "Shab-e-Qadr"
                ]
            }, 
            {
                "answer": "Barat Night", 
                "answer_id": "m.04jc26j", 
                "aliases": []
            }, 
            {
                "answer": "Mawlid", 
                "answer_id": "m.04q3_d", 
                "aliases": [
                    "mawlid al-nabi", 
                    "Prophet's Birthday", 
                    "m\u012bl\u0101d", 
                    "milad un-nabi", 
                    "mawlid al nabi", 
                    "mulud", 
                    "Mevlid", 
                    "Eid Milad ul-Nabi", 
                    "Milad-un-Nabi", 
                    "Mevlit"
                ]
            }, 
            {
                "answer": "Ramadan", 
                "answer_id": "m.06j8x", 
                "aliases": [
                    "Rama\u1e0d\u0101n", 
                    "ramazan"
                ]
            }, 
            {
                "answer": "Islamic New Year", 
                "answer_id": "m.07_46x", 
                "aliases": [
                    "Muslim New Year"
                ]
            }, 
            {
                "answer": "Night of Wishes", 
                "answer_id": "m.0vpsp_r", 
                "aliases": [
                    "Laylat Al-ragha'ib"
                ]
            }
        ], 
        "created": "2018-02-12T23:01:45"
    }, 
    {
        "ID": "WebQTrn-616_1bc2ad9e2abdfae8a3b0f6e2577f6f95", 
        "webqsp_ID": "WebQTrn-616", 
        "webqsp_question": "where did matt barnes play", 
        "machine_question": "where did matt barnes play and the basket ball team head coach is Doc Rivers", 
        "question": "What basketball team with head coach Doc Rivers did Matt Barnes play for?", 
        "sparql": "PREFIX ns: <http://rdf.freebase.com/ns/>\nSELECT DISTINCT ?x\nWHERE {\nFILTER (?x != ns:m.07dr3v)\nFILTER (!isLiteral(?x) OR lang(?x) = '' OR langMatches(lang(?x), 'en'))\nns:m.07dr3v ns:sports.pro_athlete.teams ?y .\n?y ns:sports.sports_team_roster.team ?x .\n?x ns:basketball.basketball_team.head_coach ns:m.05k13g . \n}", 
        "compositionality_type": "conjunction", 
        "answers": [
            {
                "answer": "Los Angeles Clippers", 
                "answer_id": "m.0jmjr", 
                "aliases": [
                    "Clippersi", 
                    "Lob City", 
                    "San Diego Clippers"
                ]
            }
        ], 
        "created": "2018-02-12T20:48:04"
    }, 
    {
        "ID": "WebQTest-146_befd0ad06783555d86d06ec59affdc62", 
        "webqsp_ID": "WebQTest-146", 
        "webqsp_question": "what team does jordan own", 
        "machine_question": "what team does jordan own and is the team won the 2013\u00e2\u0080\u009314 Jordan FA Cup championship", 
        "question": "Which team owned by Jordan won the 2013-14 Jordan FA Cup Championship?", 
        "sparql": "PREFIX ns: <http://rdf.freebase.com/ns/>\nSELECT DISTINCT ?x\nWHERE {\nFILTER (?x != ns:m.03__y)\nFILTER (!isLiteral(?x) OR lang(?x) = '' OR langMatches(lang(?x), 'en'))\nns:m.03__y ns:sports.sports_team_location.teams ?x .\n?x ns:sports.sports_team.championships ns:m.0wxy3_q . \n}", 
        "compositionality_type": "conjunction", 
        "answers": [
            {
                "answer": "Al-Wehdat SC", 
                "answer_id": "m.08htl1", 
                "aliases": [
                    "Wihdat", 
                    "\u0627\u0644\u0648\u062d\u062f\u0627\u062a\u200e"
                ]
            }
        ], 
        "created": "2018-02-13T02:49:18"
    }, 
    {
        "ID": "WebQTest-1056_f6c09d4ef89c1dedf48701b741bd5c03", 
        "webqsp_ID": "WebQTest-1056", 
        "webqsp_question": "who did the cleveland cavaliers draft", 
        "machine_question": "who did the cleveland cavaliers draft and is the pro athelete who started hist career on before 2008", 
        "question": "Which NBA draft pcik started their career before 2008 and was drafted by the Cleveland Cavaliers?", 
        "sparql": "PREFIX ns: <http://rdf.freebase.com/ns/>\nSELECT DISTINCT ?x\nWHERE {\nFILTER (?x != ns:m.0jm7n)\nFILTER (!isLiteral(?x) OR lang(?x) = '' OR langMatches(lang(?x), 'en'))\nns:m.0jm7n ns:sports.professional_sports_team.draft_picks ?y .\n?y ns:sports.sports_league_draft_pick.player ?x .\n?x ns:sports.pro_athlete.career_start ?num .\nFILTER (?num < \"2008\"^^xsd:dateTime) . \n}", 
        "compositionality_type": "comparative", 
        "answers": [
            {
                "answer": "LeBron James", 
                "answer_id": "m.01jz6d", 
                "aliases": [
                    "Lebron James '#23'", 
                    "King James", 
                    "LeBron Raymone James", 
                    "The L-Train", 
                    "The Chosen One", 
                    "LeBron"
                ]
            }, 
            {
                "answer": "Shannon Brown", 
                "answer_id": "m.0f2zfl", 
                "aliases": []
            }, 
            {
                "answer": "Luke Jackson", 
                "answer_id": "m.04bmkq", 
                "aliases": []
            }
        ], 
        "created": "2018-02-13T04:33:59"
    }, 
    {
        "ID": "WebQTrn-624_427154ed6cec1794077a6c077c4a4b93", 
        "webqsp_ID": "WebQTrn-624", 
        "webqsp_question": "what state did thomas jefferson live in", 
        "machine_question": "what state did the architect that desinged Poplar Forest live in", 
        "question": "What state did the architect who designed Poplar Forest live in?", 
        "sparql": "PREFIX ns: <http://rdf.freebase.com/ns/>\nSELECT DISTINCT ?x\nWHERE {\nFILTER (?x != ?c)\nFILTER (!isLiteral(?x) OR lang(?x) = '' OR langMatches(lang(?x), 'en'))\n?c ns:architecture.architect.structures_designed ns:m.02kpf3 . \n?c ns:people.person.places_lived ?y .\n?y ns:people.place_lived.location ?x .\n?x ns:common.topic.notable_types ns:m.0kpys4 .\n}\n", 
        "compositionality_type": "composition", 
        "answers": [
            {
                "answer": "Virginia", 
                "answer_id": "m.07z1m", 
                "aliases": [
                    "VA", 
                    "Mother of states", 
                    "Mother of Presidents", 
                    "Virg", 
                    "The Old Dominion"
                ]
            }
        ], 
        "created": "2018-02-12T20:49:16"
    }, 
    {
        "ID": "WebQTrn-2383_de7f547f53d6df683441d59c9f078de5", 
        "webqsp_ID": "WebQTrn-2383", 
        "webqsp_question": "what team did deion sanders play for in baseball", 
        "machine_question": "what team did deion sanders play for in baseball and the sports team owner is George Steinbrenner", 
        "question": "What team owned by George Steinbrenner did Deion Sanders play for?", 
        "sparql": "PREFIX ns: <http://rdf.freebase.com/ns/>\nSELECT DISTINCT ?x\nWHERE {\nFILTER (?x != ns:m.03n69x)\nFILTER (!isLiteral(?x) OR lang(?x) = '' OR langMatches(lang(?x), 'en'))\nns:m.03n69x ns:sports.pro_athlete.teams ?y .\n?y ns:sports.sports_team_roster.team ?x .\n?x ns:sports.sports_team.sport ns:m.018jz .\n?x ns:sports.professional_sports_team.owner_s ns:m.01q5t3 . \n}", 
        "compositionality_type": "conjunction", 
        "answers": [
            {
                "answer": "New York Yankees", 
                "answer_id": "m.0cqt41", 
                "aliases": [
                    "New York Highlanders", 
                    "Baltimore Orioles", 
                    "Bronx Bombers", 
                    "The Yanks", 
                    "Yanks", 
                    "The Pinstripers", 
                    "The Bronx Bombers", 
                    "The Pinstripes", 
                    "Evil Empire", 
                    "The Bombers", 
                    "New York Yankees", 
                    "Damn Yankees", 
                    "The Bronx Zoo", 
                    "Yankees"
                ]
            }
        ], 
        "created": "2018-02-12T23:51:03"
    }, 
    {
        "ID": "WebQTrn-2399_a7fb2152789f730426bbb17b80cf7fde", 
        "webqsp_ID": "WebQTrn-2399", 
        "webqsp_question": "what currency do i take to turkey", 
        "machine_question": "what currency do i take to the country that contains Samsun Province", 
        "question": "The country that includes Samsun Province uses what type of currency?", 
        "sparql": "PREFIX ns: <http://rdf.freebase.com/ns/>\nSELECT DISTINCT ?x\nWHERE {\nFILTER (?x != ?c)\nFILTER (!isLiteral(?x) OR lang(?x) = '' OR langMatches(lang(?x), 'en'))\n?c ns:location.country.administrative_divisions ns:m.034718 . \n?c ns:location.country.currency_used ?x .\n}\n", 
        "compositionality_type": "composition", 
        "answers": [
            {
                "answer": "Turkish lira", 
                "answer_id": "m.04dq0w", 
                "aliases": [
                    "Turkish lira (Remonetized)"
                ]
            }
        ], 
        "created": "2018-02-12T23:52:20"
    }, 
    {
        "ID": "WebQTrn-1222_fbadfd31c428e12e4f20fc2ba035004d", 
        "webqsp_ID": "WebQTrn-1222", 
        "webqsp_question": "where to stay in paris france", 
        "machine_question": "where to stay in the city that hosted 1900 Summer Olympics", 
        "question": "Where are the places to stay in the place that hosted 1900 Summer Olympics?", 
        "sparql": "PREFIX ns: <http://rdf.freebase.com/ns/>\nSELECT DISTINCT ?x\nWHERE {\nFILTER (?x != ?c)\nFILTER (!isLiteral(?x) OR lang(?x) = '' OR langMatches(lang(?x), 'en'))\n?c ns:olympics.olympic_host_city.olympics_hosted ns:m.016r9z . \n?c ns:travel.travel_destination.accommodation ?x .\n}\n", 
        "compositionality_type": "composition", 
        "answers": [
            {
                "answer": "H\u00f4tel de Crillon", 
                "answer_id": "m.04fcxl", 
                "aliases": [
                    "Hotel de Crillon", 
                    "H\u00f4tel de Crillon, Paris"
                ]
            }, 
            {
                "answer": "H\u00f4tel Ritz Paris", 
                "answer_id": "m.056n81", 
                "aliases": [
                    "Hotel Ritz Paris"
                ]
            }
        ], 
        "created": "2018-02-12T21:56:24"
    }, 
    {
        "ID": "WebQTrn-117_138e9a68609f316d15e3b90b6d84cae1", 
        "webqsp_ID": "WebQTrn-117", 
        "webqsp_question": "where did dr seuss go to school", 
        "machine_question": "where did the illustrator of the book Bartholomew and the Oobleck go to school", 
        "question": "What school the the person who illustrated the book titled Bartholomew and the Oobleck attend?",
[truncated: 4,945,690 more chars]
