# Supplementary material
Source: ML conference proceedings conference paper supplement (https://aclanthology.org/N18-1059)
Supplement: Datasets [file N18-1059.Datasets.zip › ComplexWebQuestions_train.json]

[
    {
        "ID": "WebQTrn-3513_7c4117891abf63781b892537979054c6", 
        "webqsp_ID": "WebQTrn-3513", 
        "webqsp_question": "what state is the george washington university in", 
        "machine_question": "what state is the the education institution has a sports team named George Washington Colonials men's basketball in", 
        "question": "What state is home to the university that is represented in sports by George Washington Colonials men's basketball?", 
        "sparql": "PREFIX ns: <http://rdf.freebase.com/ns/>\nSELECT DISTINCT ?x\nWHERE {\nFILTER (?x != ?c)\nFILTER (!isLiteral(?x) OR lang(?x) = '' OR langMatches(lang(?x), 'en'))\n?c ns:education.educational_institution.sports_teams ns:m.03d0l76 . \n?c ns:organization.organization.headquarters ?y .\n?y ns:location.mailing_address.state_province_region ?x .\n}\n", 
        "compositionality_type": "composition", 
        "answers": [
            {
                "answer": "Washington, D.C.", 
                "answer_id": "m.0rh6k", 
                "aliases": [
                    "Washington D.C.", 
                    "Washington", 
                    "The District", 
                    "U.S. Capital", 
                    "District of Columbia / Washington city", 
                    "The District of Columbia", 
                    "District of Columbia", 
                    "Washington DC"
                ]
            }
        ], 
        "created": "2018-02-13T02:07:47"
    }, 
    {
        "ID": "WebQTrn-2136_d95da5fb8a16d81fe56cd4ce00843254", 
        "webqsp_ID": "WebQTrn-2136", 
        "webqsp_question": "what year did baltimore ravens win the superbowl", 
        "machine_question": "what year did the sports team with the fight song The Baltimore Fight Song win the superbowl", 
        "question": "What year did the team with Baltimore Fight Song win the Superbowl?", 
        "sparql": "PREFIX ns: <http://rdf.freebase.com/ns/>\nSELECT DISTINCT ?x\nWHERE {\nFILTER (?x != ?c)\nFILTER (!isLiteral(?x) OR lang(?x) = '' OR langMatches(lang(?x), 'en'))\n?c ns:sports.sports_team.fight_song ns:m.0hn47qp . \n?c ns:sports.sports_team.championships ?x .\n?x ns:sports.sports_championship_event.championship ns:m.06x5s .\n}\n", 
        "compositionality_type": "composition", 
        "answers": [
            {
                "answer": "Super Bowl XLVII", 
                "answer_id": "m.0642vqv", 
                "aliases": [
                    "Super Bowl 2013", 
                    "Super Bowl 47"
                ]
            }, 
            {
                "answer": "Super Bowl XXXV", 
                "answer_id": "m.076yq", 
                "aliases": []
            }
        ], 
        "created": "2018-02-12T23:27:26"
    }, 
    {
        "ID": "WebQTrn-2360_a40a0d50b9a1006e2d254705d46345ea", 
        "webqsp_ID": "WebQTrn-2360", 
        "webqsp_question": "what football teams did emmitt smith play for", 
        "machine_question": "what football teams did emmitt smith play for and is the sports team with the fight song The Orange and Blue", 
        "question": "Which school with the fight song \"The Orange and Blue\" did Emmitt Smith play for?", 
        "sparql": "PREFIX ns: <http://rdf.freebase.com/ns/>\nSELECT DISTINCT ?x\nWHERE {\nFILTER (?x != ns:m.01480y)\nFILTER (!isLiteral(?x) OR lang(?x) = '' OR langMatches(lang(?x), 'en'))\nns:m.01480y ns:sports.pro_athlete.teams ?y .\n?y ns:sports.sports_team_roster.team ?x .\n?x ns:sports.sports_team.fight_song ns:m.04f__h7 . \n}", 
        "compositionality_type": "conjunction", 
        "answers": [
            {
                "answer": "Florida Gators football", 
                "answer_id": "m.0ftf0f", 
                "aliases": [
                    "University of Florida Gators Mens Football", 
                    "Gators Mens Football", 
                    "Florida Gators Football", 
                    "Gators Men's Football", 
                    "University of Florida Mens Football", 
                    "University of Florida Football", 
                    "Florida Men's Football", 
                    "UF Gators Mens Football", 
                    "University of Florida Gators Men's Football", 
                    "UF Mens Football", 
                    "University of Florida Men's Football", 
                    "Gators Football", 
                    "UF Gators Football", 
                    "University of Florida Gators Football", 
                    "UF Gators Men's Football", 
                    "UF Football", 
                    "Florida Gators Men's Football", 
                    "Florida Football", 
                    "Florida Mens Football", 
                    "Florida Gators Mens Football", 
                    "UF Men's Football"
                ]
            }
        ], 
        "created": "2018-02-12T23:49:23"
    }, 
    {
        "ID": "WebQTest-415_b6ad66a3f1f515d0688c346e16d202e6", 
        "webqsp_ID": "WebQTest-415", 
        "webqsp_question": "what movies did tupac star in", 
        "machine_question": "what movies did tupac star in and is the film has a charcter named Mr. Woodson", 
        "question": "What movie with film character named Mr. Woodson did Tupac star in?", 
        "sparql": "PREFIX ns: <http://rdf.freebase.com/ns/>\nSELECT DISTINCT ?x\nWHERE {\nFILTER (?x != ns:m.07pzc)\nFILTER (!isLiteral(?x) OR lang(?x) = '' OR langMatches(lang(?x), 'en'))\nns:m.07pzc ns:film.actor.film ?y .\n?y ns:film.performance.film ?x .\n?x ns:film.film.starring ?c .\n?c ns:film.performance.character ns:m.0dl7n6y . \n}", 
        "compositionality_type": "conjunction", 
        "answers": [
            {
                "answer": "Gridlock'd", 
                "answer_id": "m.08dk0b", 
                "aliases": []
            }
        ], 
        "created": "2018-02-13T03:27:47"
    }, 
    {
        "ID": "WebQTest-341_0f5ccea2d11b712eda64ebf2f6aeb1ee", 
        "webqsp_ID": "WebQTest-341", 
        "webqsp_question": "what countries share borders with spain", 
        "machine_question": "what countries share borders with spain and is the country that contains Set\u00c3\u00babal District", 
        "question": "What country sharing borders with Spain does the Set\u00c3\u00babal District belong to?", 
        "sparql": "PREFIX ns: <http://rdf.freebase.com/ns/>\nSELECT DISTINCT ?x\nWHERE {\nFILTER (?x != ns:m.06mkj)\nFILTER (!isLiteral(?x) OR lang(?x) = '' OR langMatches(lang(?x), 'en'))\nns:m.06mkj ns:location.location.adjoin_s ?y .\n?y ns:location.adjoining_relationship.adjoins ?x .\n?x ns:common.topic.notable_types ns:m.01mp .\n?x ns:location.country.administrative_divisions ns:m.017927 . \n}", 
        "compositionality_type": "conjunction", 
        "answers": [
            {
                "answer": "Portugal", 
                "answer_id": "m.05r4w", 
                "aliases": [
                    "Portuguese Republic"
                ]
            }
        ], 
        "created": "2018-02-13T03:20:47"
    }, 
    {
        "ID": "WebQTrn-1430_ac053cda0a7424c48e4809c71171fbed", 
        "webqsp_ID": "WebQTrn-1430", 
        "webqsp_question": "who was the president of pakistan in 1980", 
        "machine_question": "who was the president of the country that contains Azad Kashmir in 1980", 
        "question": "Who was the president in 1980 of the country that has Azad Kashmir?", 
        "sparql": "PREFIX ns: <http://rdf.freebase.com/ns/>\nSELECT DISTINCT ?x\nWHERE {\nFILTER (?x != ?c)\nFILTER (!isLiteral(?x) OR lang(?x) = '' OR langMatches(lang(?x), 'en'))\n?c ns:location.country.administrative_divisions ns:m.010vz . \n?c ns:government.governmental_jurisdiction.governing_officials ?y .\n?y ns:government.government_position_held.office_holder ?x .\n?y ns:government.government_position_held.basic_title ns:m.060c4 .\nFILTER(NOT EXISTS {?y ns:government.government_position_held.from ?sk0} || \nEXISTS {?y ns:government.government_position_held.from ?sk1 . \nFILTER(xsd:datetime(?sk1) <= \"1980-12-31\"^^xsd:dateTime) })\nFILTER(NOT EXISTS {?y ns:government.government_position_held.to ?sk2} || \nEXISTS {?y ns:government.government_position_held.to ?sk3 . \nFILTER(xsd:datetime(?sk3) >= \"1980-01-01\"^^xsd:dateTime) })\n}\n", 
        "compositionality_type": "composition", 
        "answers": [
            {
                "answer": "Muhammad Zia-ul-Haq", 
                "answer_id": "m.01j5_1", 
                "aliases": []
            }
        ], 
        "created": "2018-02-12T22:17:21"
    }, 
    {
        "ID": "WebQTrn-3239_5e43a21c08076aabc07f1a6fd6ae6bb9", 
        "webqsp_ID": "WebQTrn-3239", 
        "webqsp_question": "who coached the dallas cowboys in 1996", 
        "machine_question": "who coached the the sports team owner is Jerry Jones in 1996", 
        "question": "Who was the 1996 coach of the team owned by Jerry Jones?", 
        "sparql": "PREFIX ns: <http://rdf.freebase.com/ns/>\nSELECT DISTINCT ?x\nWHERE {\nFILTER (?x != ?c)\nFILTER (!isLiteral(?x) OR lang(?x) = '' OR langMatches(lang(?x), 'en'))\n?c ns:sports.professional_sports_team.owner_s ns:m.016b9c . \n?c ns:american_football.football_team.historical_coaching_staff ?y .\n?y ns:american_football.football_historical_coach_position.coach ?x .\nFILTER(NOT EXISTS {?y ns:american_football.football_historical_coach_position.from ?sk0} || \nEXISTS {?y ns:american_football.football_historical_coach_position.from ?sk1 . \nFILTER(xsd:datetime(?sk1) <= \"1996-12-31\"^^xsd:dateTime) })\nFILTER(NOT EXISTS {?y ns:american_football.football_historical_coach_position.to ?sk2} || \nEXISTS {?y ns:american_football.football_historical_coach_position.to ?sk3 . \nFILTER(xsd:datetime(?sk3) >= \"1996-01-01\"^^xsd:dateTime) })\n}\n", 
        "compositionality_type": "composition", 
        "answers": [
            {
                "answer": "Barry Switzer", 
                "answer_id": "m.016b90", 
                "aliases": [
                    "The King"
                ]
            }
        ], 
        "created": "2018-02-13T01:30:16"
    }, 
    {
        "ID": "WebQTest-1085_1cffc5c553afc1802970e8a6064cac32", 
        "webqsp_ID": "WebQTest-1085", 
        "webqsp_question": "who was demi lovato dating", 
        "machine_question": "who was the artist had a concert tour named Demi World Tour dating", 
        "question": "Who dated the performer who headlined the concert tour called Demi World Tour?", 
        "sparql": "PREFIX ns: <http://rdf.freebase.com/ns/>\nSELECT DISTINCT ?x\nWHERE {\nFILTER (?x != ?c)\nFILTER (!isLiteral(?x) OR lang(?x) = '' OR langMatches(lang(?x), 'en'))\n?c ns:music.artist.concert_tours ns:m.010pzj9k . \n?c ns:base.popstra.celebrity.dated ?y .\n?y ns:base.popstra.dated.participant ?x .\n}\n", 
        "compositionality_type": "composition", 
        "answers": [
            {
                "answer": "Nicholas Braun", 
                "answer_id": "m.03cg2rv", 
                "aliases": [
                    "Nick", 
                    "Nicholas Joseph \"Nick\" Braun", 
                    "Nicholas Joseph Braun", 
                    "Nick Braun"
                ]
            }, 
            {
                "answer": "Joe Jonas", 
                "answer_id": "m.04cr6qv", 
                "aliases": [
                    "The High Flier", 
                    "Jonas Brothers", 
                    "Joseph Jonas", 
                    "the Jonas Brothers", 
                    "Joe", 
                    "JJ", 
                    "Joseph Adam Jonas", 
                    "DJ Danger"
                ]
            }, 
            {
                "answer": "Cody Linley", 
                "answer_id": "m.0cq3wn", 
                "aliases": [
                    "Cody Martin Linley"
                ]
            }
        ], 
        "created": "2018-02-13T04:40:27"
    }, 
    {
        "ID": "WebQTrn-2581_321be15dae483ed949b74cf01e259708", 
        "webqsp_ID": "WebQTrn-2581", 
        "webqsp_question": "who has tim howard played for", 
        "machine_question": "who has tim howard played for and the sports team owner is Malcolm Glazer", 
        "question": "Which team owned by Malcolm Glazer has Tim Howard playing for it?", 
        "sparql": "PREFIX ns: <http://rdf.freebase.com/ns/>\nSELECT DISTINCT ?x\nWHERE {\nFILTER (?x != ns:m.026s3n)\nFILTER (!isLiteral(?x) OR lang(?x) = '' OR langMatches(lang(?x), 'en'))\nns:m.026s3n ns:sports.pro_athlete.teams ?y .\n?y ns:sports.sports_team_roster.team ?x .\n?x ns:sports.professional_sports_team.owner_s ns:m.043cq6 . \n}", 
        "compositionality_type": "conjunction", 
        "answers": [
            {
                "answer": "Manchester United F.C.", 
                "answer_id": "m.050fh", 
                "aliases": [
                    "Manchester United", 
                    "Manchester United Football Club", 
                    "Man Utd", 
                    "Manchester United FC", 
                    "Newton Heath LYR Football Club", 
                    "Man United", 
                    "The Red Devils"
                ]
            }
        ], 
        "created": "2018-02-13T00:14:23"
    }, 
    {
        "ID": "WebQTrn-1695_169b16997f31147833cb12147ed060bb", 
        "webqsp_ID": "WebQTrn-1695", 
        "webqsp_question": "what movies does zac efron star in", 
        "machine_question": "what movies does zac efron star in and is the film has a charcter named Owen Lars", 
        "question": "What movie starring Zac Efron that has a character named Owen Lars?", 
        "sparql": "PREFIX ns: <http://rdf.freebase.com/ns/>\nSELECT DISTINCT ?x\nWHERE {\nFILTER (?x != ns:m.06wm0z)\nFILTER (!isLiteral(?x) OR lang(?x) = '' OR langMatches(lang(?x), 'en'))\nns:m.06wm0z ns:film.actor.film ?y .\n?y ns:film.performance.film ?x .\n?x ns:film.film.starring ?c .\n?c ns:film.performance.character ns:g.11b62w3281 . \n}", 
        "compositionality_type": "conjunction", 
        "answers": [
            {
                "answer": "Robot Chicken: Star Wars Episode III", 
                "answer_id": "m.0g55yqj", 
                "aliases": [
                    "Robot Chicken: Star Wars III"
                ]
            }
        ], 
        "created": "2018-02-12T22:43:12"
    }, 
    {
        "ID": "WebQTrn-2773_7f835727d3cecbcb6c6b48db1fe147b9", 
        "webqsp_ID": "WebQTrn-2773", 
        "webqsp_question": "what was henry ford best known for", 
        "machine_question": "what was the person education institution is Detroit Business Institute best known for", 
        "question": "What business titles was the most famous alumni of Detroit Business Institute best known for?", 
        "sparql": "PREFIX ns: <http://rdf.freebase.com/ns/>\nSELECT DISTINCT ?x\nWHERE {\nFILTER (?x != ?c)\nFILTER (!isLiteral(?x) OR lang(?x) = '' OR langMatches(lang(?x), 'en'))\n?c ns:people.person.education ?k .\n?k ns:education.education.institution ns:m.09ggd7n . \n?c ns:people.person.profession ?x .\n}\n", 
        "compositionality_type": "composition", 
        "answers": [
            {
                "answer": "Businessperson", 
                "answer_id": "m.012t_z", 
                "aliases": [
                    "Businesswoman", 
                    "Business person", 
                    "Businessman"
                ]
            }, 
            {
                "answer": "Business magnate", 
                "answer_id": "m.025spv", 
                "aliases": [
                    "Industralist"
                ]
            }, 
            {
                "answer": "Industrialist", 
                "answer_id": "m.02h6nc9", 
                "aliases": []
            }, 
            {
                "answer": "Inventor", 
                "answer_id": "m.03sbb", 
                "aliases": []
            }, 
            {
                "answer": "Engineer", 
                "answer_id": "m.09j9h", 
                "aliases": []
            }, 
            {
                "answer": "Entrepreneur", 
                "answer_id": "m.09x_r", 
                "aliases": [
                    "Entrepeneur"
                ]
            }
        ], 
        "created": "2018-02-13T00:40:08"
    }, 
    {
        "ID": "WebQTrn-2518_1ef15e22372df70baf01b72850deb14d", 
        "webqsp_ID": "WebQTrn-2518", 
        "webqsp_question": "who did michael jackson play in the wiz", 
        "machine_question": "who did the artist had a concert tour named HIStory World Tour play in the wiz", 
        "question": "The artist from the HIStory World Tour concert tour played what character on the Wiz?", 
        "sparql": "PREFIX ns: <http://rdf.freebase.com/ns/>\nSELECT DISTINCT ?x\nWHERE {\nFILTER (?x != ?c)\nFILTER (!isLiteral(?x) OR lang(?x) = '' OR langMatches(lang(?x), 'en'))\n?c ns:music.artist.concert_tours ns:m.09x1nf . \n?c ns:film.actor.film ?y .\n?y ns:film.performance.character ?x .\n?y ns:film.performance.film ns:m.027fwmt .\n}\n", 
        "compositionality_type": "composition", 
        "answers": [
            {
                "answer": "Scarecrow", 
                "answer_id": "m.02ztbm", 
                "aliases": [
                    "Korkuluk", 
                    "Yero", 
                    "Scarecrow", 
                    "Fiyero"
                ]
            }
        ], 
        "created": "2018-02-13T00:05:04"
    }, 
    {
        "ID": "WebQTrn-2946_93c6dae3d218dbe112d4120f45c93298", 
        "webqsp_ID": "WebQTrn-2946", 
        "webqsp_question": "who did tyson chandler play for", 
        "machine_question": "who did tyson chandler play for and is the team has a team moscot named Champ", 
        "question": "What team with mascot named Champ did Tyson Chandler play for?", 
        "sparql": "PREFIX ns: <http://rdf.freebase.com/ns/>\nSELECT DISTINCT ?x\nWHERE {\nFILTER (?x != ns:m.05j8c8)\nFILTER (!isLiteral(?x) OR lang(?x) = '' OR langMatches(lang(?x), 'en'))\nns:m.05j8c8 ns:sports.pro_athlete.teams ?y .\n?y ns:sports.sports_team_roster.team ?x .\n?x ns:sports.sports_team.team_mascot ns:m.0kh6jz4 . \n}", 
        "compositionality_type": "conjunction", 
        "answers": [
            {
                "answer": "Dallas Mavericks", 
                "answer_id": "m.0jmcv", 
                "aliases": [
                    "Mavs", 
                    "Mavericks"
                ]
            }
        ], 
        "created": "2018-02-13T00:56:07"
    }, 
    {
        "ID": "WebQTrn-3430_b427773422892f8fd251d3a52b01585b", 
        "webqsp_ID": "WebQTrn-3430", 
        "webqsp_question": "who created the chinese communist party", 
        "machine_question": "who created the chinese communist party and is the person notable with the medical condition Parkinson's disease", 
        "question": "Who was the creator of the communist party that had Parkinson's disease?", 
        "sparql": "PREFIX ns: <http://rdf.freebase.com/ns/>\nSELECT DISTINCT ?x\nWHERE {\nFILTER (?x != ns:m.02189)\nFILTER (!isLiteral(?x) OR lang(?x) = '' OR langMatches(lang(?x), 'en'))\nns:m.02189 ns:organization.organization.founders ?x .\n?x ns:medicine.notable_person_with_medical_condition.condition ns:m.0g02vk . \n}", 
        "compositionality_type": "conjunction", 
        "answers": [
            {
                "answer": "Mao Zedong", 
                "answer_id": "m.04xzm", 
                "aliases": [
                    "Chairman Mao", 
                    "Zedong Mao", 
                    "Mao Runzhi", 
                    "The Great Helmsman", 
                    "Mao Tse-Tung"
                ]
            }
        ], 
        "created": "2018-02-13T01:54:29"
    }, 
    {
        "ID": "WebQTrn-2358_4e6ec1c814181157f8b2ec86daa6e6e0", 
        "webqsp_ID": "WebQTrn-2358", 
        "webqsp_question": "where did newt gingrich attend college", 
        "machine_question": "where did newt gingrich attend college and is the educational institution with the mascot Riptide the Pelican", 
        "question": "Which college featured Riptide the pelican as a mascot and includes Newt Gincrich as an alumni?", 
        "sparql": "PREFIX ns: <http://rdf.freebase.com/ns/>\nSELECT DISTINCT ?x\nWHERE {\nFILTER (?x != ns:m.018fzs)\nFILTER (!isLiteral(?x) OR lang(?x) = '' OR langMatches(lang(?x), 'en'))\nns:m.018fzs ns:people.person.education ?y .\n?y ns:education.education.institution ?x .\n?x ns:common.topic.notable_types ns:m.01y2hnl .\n?x ns:education.educational_institution.mascot ns:m.05g1yr7 . \n}", 
        "compositionality_type": "conjunction", 
        "answers": [
            {
                "answer": "Tulane University", 
                "answer_id": "m.0160nk", 
                "aliases": [
                    "Tulane University, main campus", 
                    "Tulane", 
                    "TU", 
                    "Tulane University of Louisiana", 
                    "Tulane University of Louisiana, main campus", 
                    "Tulane University"
                ]
            }
        ], 
        "created": "2018-02-12T23:49:19"
    }, 
    {
        "ID": "WebQTest-1556_f58b33790040a7ff120472d8609ef82e", 
        "webqsp_ID": "WebQTest-1556", 
        "webqsp_question": "when 's the last time the mets won the world series", 
        "machine_question": "when 's the last time the the organiztion leadership has a person named Terry Collins won the world series", 
        "question": "When did the team who has Terry Collins in leadership last win the world series?", 
        "sparql": "PREFIX ns: <http://rdf.freebase.com/ns/>\nSELECT DISTINCT ?x\nWHERE {\nFILTER (?x != ?c)\nFILTER (!isLiteral(?x) OR lang(?x) = '' OR langMatches(lang(?x), 'en'))\n?c ns:organization.organization.leadership ?k .\n?k ns:organization.leadership.person ns:m.0bz4qr . \n?c ns:sports.sports_team.championships ?x .\n?x ns:time.event.end_date ?sk0 .\n}\nORDER BY DESC(xsd:datetime(?sk0))\nLIMIT 1\n", 
        "compositionality_type": "composition", 
        "answers": [
            {
                "answer": "1986 World Series", 
                "answer_id": "m.01q9lc", 
                "aliases": [
                    "1986 World"
                ]
            }
        ], 
        "created": "2018-02-13T05:33:22"
    }, 
    {
        "ID": "WebQTest-2008_8c6b952c6bd963f0ece4e401c9eb731a", 
        "webqsp_ID": "WebQTest-2008", 
        "webqsp_question": "which countries speak arabic language", 
        "machine_question": "which countries speak arabic language and the location time zone is Central Time Zone", 
        "question": "What country speaks Arabic in the Central Time Zone?", 
        "sparql": "PREFIX ns: <http://rdf.freebase.com/ns/>\nSELECT DISTINCT ?x\nWHERE {\nFILTER (?x != ns:m.0jzc)\nFILTER (!isLiteral(?x) OR lang(?x) = '' OR langMatches(lang(?x), 'en'))\nns:m.0jzc ns:language.human_language.countries_spoken_in ?x .\n?x ns:location.location.time_zones ns:m.02fqwt . \n}", 
        "compositionality_type": "conjunction", 
        "answers": [
            {
                "answer": "Canada", 
                "answer_id": "m.0d060g", 
                "aliases": [
                    "Dominion of Canada", 
                    "Canuckistan"
                ]
            }
        ], 
        "created": "2018-02-13T06:28:42"
    }, 
    {
        "ID": "WebQTrn-388_72afc30add424e52cbe00b736509ec22", 
        "webqsp_ID": "WebQTrn-388", 
        "webqsp_question": "what language do they speak in iceland wikipedia", 
        "machine_question": "what language do they speak in the country that contains Southern Peninsula wikipedia", 
        "question": "What language is spoken in the country that has Southern Peninsular?", 
        "sparql": "PREFIX ns: <http://rdf.freebase.com/ns/>\nSELECT DISTINCT ?x\nWHERE {\nFILTER (?x != ?c)\nFILTER (!isLiteral(?x) OR lang(?x) = '' OR langMatches(lang(?x), 'en'))\n?c ns:location.country.administrative_divisions ns:m.08kmfj . \n?c ns:location.country.languages_spoken ?x .\n}\n", 
        "compositionality_type": "composition", 
        "answers": [
            {
                "answer": "Icelandic Language", 
                "answer_id": "m.01gmkg", 
                "aliases": [
                    "\u00cdslenska", 
                    "Icelandic", 
                    "Islenska"
                ]
            }
        ], 
        "created": "2018-02-12T20:20:34"
    }, 
    {
        "ID": "WebQTest-923_e3a2d3d50bac69d563de83a7f72eafc0", 
        "webqsp_ID": "WebQTest-923", 
        "webqsp_question": "what countries does england border", 
        "machine_question": "what countries does england border and the religious organization leadeship is Noddfa, Treorchy", 
        "question": "Which country with religious organization leadership Noddfa, Treorchy borders England?", 
        "sparql": "PREFIX ns: <http://rdf.freebase.com/ns/>\nSELECT DISTINCT ?x\nWHERE {\nFILTER (?x != ns:m.02jx1)\nFILTER (!isLiteral(?x) OR lang(?x) = '' OR langMatches(lang(?x), 'en'))\nns:m.02jx1 ns:location.location.adjoin_s ?y .\n?y ns:location.adjoining_relationship.adjoins ?x .\n?x ns:base.biblioness.bibs_location.loc_type ?sk0 .\nFILTER (str(?sk0) = \"Country\")\n?x ns:religion.religious_leadership_jurisdiction.leader ?c .\n?c ns:religion.religious_organization_leadership.organization ns:m.0_gw15p . \n}", 
        "compositionality_type": "conjunction", 
        "answers": [
            {
                "answer": "Wales", 
                "answer_id": "m.0j5g9", 
                "aliases": []
            }
        ], 
        "created": "2018-02-13T04:25:31"
    }, 
    {
        "ID": "WebQTrn-37_51530e5585466e3d69fbf894a0125e3b", 
        "webqsp_ID": "WebQTrn-37", 
        "webqsp_question": "what sport do the toronto maple leafs play", 
        "machine_question": "what sport do the the team won the 1948 Stanley Cup Finals championship play", 
        "question": "What sport was played by the winners of the 1948 Stanley Cup?", 
        "sparql": "PREFIX ns: <http://rdf.freebase.com/ns/>\nSELECT DISTINCT ?x\nWHERE {\nFILTER (?x != ?c)\nFILTER (!isLiteral(?x) OR lang(?x) = '' OR langMatches(lang(?x), 'en'))\n?c ns:sports.sports_team.championships ns:m.03cjpsk . \n?c ns:base.events.event_presenting_organisation.event_feed ?y .\n?y ns:base.events.event_feed.type_of_event ?x .\n}\n", 
        "compositionality_type": "composition", 
        "answers": [
            {
                "answer": "Ice Hockey", 
                "answer_id": "m.03tmr", 
                "aliases": [
                    "Hockey"
                ]
            }
        ], 
        "created": "2018-02-12T19:42:47"
    }, 
    {
        "ID": "WebQTrn-2362_e947d8eac3c8342630bdaa12e7ac0ae5", 
        "webqsp_ID": "WebQTrn-2362", 
        "webqsp_question": "what city is purdue university located", 
        "machine_question": "what city is the education institution has a sports team named Purdue Boilermakers men's basketball located", 
        "question": "Which city is home to the University that is known for Purdue Boilermakers men's basketball?", 
        "sparql": "PREFIX ns: <http://rdf.freebase.com/ns/>\nSELECT DISTINCT ?x\nWHERE {\nFILTER (?x != ?c)\nFILTER (!isLiteral(?x) OR lang(?x) = '' OR langMatches(lang(?x), 'en'))\n?c ns:education.educational_institution.sports_teams ns:m.026w398 . \n?c ns:location.location.street_address ?y .\n?y ns:location.mailing_address.citytown ?x .\n}\n", 
        "compositionality_type": "composition", 
        "answers": [
            {
                "answer": "West Lafayette", 
                "answer_id": "m.0sqd0", 
                "aliases": [
                    "West Lafayette, Indiana", 
                    "Tippecanoe County / West Lafayette city"
                ]
            }
        ], 
        "created": "2018-02-12T23:49:35"
    }, 
    {
        "ID": "WebQTrn-2678_93995ecbdd166fc16365a56ed489eec0", 
        "webqsp_ID": "WebQTrn-2678", 
        "webqsp_question": "what to see in dallas tx", 
        "machine_question": "what to see in dallas tx and is the zoo that opened on earliest", 
        "question": "What zoo that opened earliest is there to see in Dallas, TX?", 
        "sparql": "PREFIX ns: <http://rdf.freebase.com/ns/>\nSELECT DISTINCT ?x\nWHERE {\nFILTER (?x != ns:m.0f2rq)\nFILTER (!isLiteral(?x) OR lang(?x) = '' OR langMatches(lang(?x), 'en'))\nns:m.0f2rq ns:travel.travel_destination.tourist_attractions ?x .\n?x ns:zoos.zoo.opened ?num .\n}\nORDER BY ?num LIMIT 1", 
        "compositionality_type": "superlative", 
        "answers": [
            {
                "answer": "Dallas Zoo", 
                "answer_id": "m.06w96j", 
                "aliases": []
            }
        ], 
        "created": "2018-02-13T00:25:36"
    }, 
    {
        "ID": "WebQTest-832_c334509bb5e02cacae1ba2e80c176499", 
        "webqsp_ID": "WebQTest-832", 
        "webqsp_question": "when is the last time the giants won the world series", 
        "machine_question": "when is the last time the the team has a team moscot named Lou Seal won the world series", 
        "question": "Lou Seal is the mascot for the team that last won the World Series when?", 
        "sparql": "PREFIX ns: <http://rdf.freebase.com/ns/>\nSELECT DISTINCT ?x\nWHERE {\nFILTER (?x != ?c)\nFILTER (!isLiteral(?x) OR lang(?x) = '' OR langMatches(lang(?x), 'en'))\n?c ns:sports.sports_team.team_mascot ns:m.03_dwn . \n?c ns:sports.sports_team.championships ?x .\n?x ns:time.event.start_date ?sk0 .\n}\nORDER BY DESC(xsd:datetime(?sk0))\nLIMIT 1\n", 
        "compositionality_type": "composition", 
        "answers": [
            {
                "answer": "2014 World Series", 
                "answer_id": "m.0117q3yz", 
                "aliases": [
                    "2014 World"
                ]
            }
        ], 
        "created": "2018-02-13T04:12:57"
    }, 
    {
        "ID": "WebQTrn-3257_f085fa4c2b6c7af6fd1f07e269a418de", 
        "webqsp_ID": "WebQTrn-3257", 
        "webqsp_question": "who does cristiano ronaldo play for 2012", 
        "machine_question": "who does cristiano ronaldo play for 2012 and is the team won the 1956 Peque\u00c3\u00b1a Copa del Mundo de Clubes championship", 
        "question": "What team that won the 1956 Peque\u00c3\u00b1a Copa del Mundo de Clubes championship does Cristiano Ronaldo play for in 2012?", 
        "sparql": "PREFIX ns: <http://rdf.freebase.com/ns/>\nSELECT DISTINCT ?x\nWHERE {\nFILTER (?x != ns:m.02xt6q)\nFILTER (!isLiteral(?x) OR lang(?x) = '' OR langMatches(lang(?x), 'en'))\nns:m.02xt6q ns:sports.pro_athlete.teams ?y .\n?y ns:sports.sports_team_roster.team ?x .\nFILTER(NOT EXISTS {?y ns:sports.sports_team_roster.from ?sk0} || \nEXISTS {?y ns:sports.sports_team_roster.from ?sk1 . \nFILTER(xsd:datetime(?sk1) <= \"2012-12-31\"^^xsd:dateTime) })\nFILTER(NOT EXISTS {?y ns:sports.sports_team_roster.to ?sk2} || \nEXISTS {?y ns:sports.sports_team_roster.to ?sk3 . \nFILTER(xsd:datetime(?sk3) >= \"2012-01-01\"^^xsd:dateTime) })\n?x ns:sports.sports_team.championships ns:m.011q6011 . \n}", 
        "compositionality_type": "conjunction", 
        "answers": [
            {
                "answer": "Real Madrid C.F.", 
                "answer_id": "m.06l22", 
                "aliases": [
                    "Real Madrid C.F. in European football", 
                    "Sociedad Madrid FC", 
                    "Los Merengues", 
                    "Los Vikingos", 
                    "Royal Madrid Football Club", 
                    "Real Madrid", 
                    "Madrid Football Club", 
                    "Real Madrid Club de F\u00fatbol", 
                    "Los Blancos"
                ]
            }
        ], 
        "created": "2018-02-13T01:32:18"
    }, 
    {
        "ID": "WebQTrn-2649_49cff836e2d4d893a9e364573ab1e3c2", 
        "webqsp_ID": "WebQTrn-2649", 
        "webqsp_question": "where is alex smith from", 
        "machine_question": "where is the person education institution is Assuptuion Saint Bridget from", 
        "question": "A person attending education institution Assuptuion Saint Bridget is from where?", 
        "sparql": "PREFIX ns: <http://rdf.freebase.com/ns/>\nSELECT DISTINCT ?x\nWHERE {\nFILTER (?x != ?c)\nFILTER (!isLiteral(?x) OR lang(?x) = '' OR langMatches(lang(?x), 'en'))\n?c ns:people.person.education ?k .\n?k ns:education.education.institution ns:m.02wsngb . \n?c ns:people.person.place_of_birth ?x .\n}\n", 
        "compositionality_type": "composition", 
        "answers": [
            {
                "answer": "Bremerton", 
                "answer_id": "m.010rvx", 
                "aliases": [
                    "Bremerton, Washington", 
                    "Kitsap County / Bremerton city"
                ]
            }
        ], 
        "created": "2018-02-13T00:23:03"
    }, 
    {
        "ID": "WebQTrn-1221_edf6a52008463727e837bd3577442966", 
        "webqsp_ID": "WebQTrn-1221", 
        "webqsp_question": "what is the braves mascot", 
        "machine_question": "what is the the team has a team moscot named Homer mascot", 
        "question": "What sports team has a mascot with the name of Homer?", 
        "sparql": "PREFIX ns: <http://rdf.freebase.com/ns/>\nSELECT DISTINCT ?x\nWHERE {\nFILTER (?x != ?c)\nFILTER (!isLiteral(?x) OR lang(?x) = '' OR langMatches(lang(?x), 'en'))\n?c ns:sports.sports_team.team_mascot ns:m.07vbb7 . \n?c ns:sports.sports_team.team_mascot ?x .\n}\n", 
        "compositionality_type": "composition", 
        "answers": [
            {
                "answer": "Homer", 
                "answer_id": "m.07vbb7", 
                "aliases": []
            }, 
            {
                "answer": "Rally", 
                "answer_id": "m.07vbfd", 
                "aliases": []
            }, 
            {
                "answer": "Chief Noc-A-Homa", 
                "answer_id": "m.07vbvp", 
                "aliases": []
            }
        ], 
        "created": "2018-02-12T21:56:10"
    }, 
    {
        "ID": "WebQTrn-1259_1997cb4922db71983be26e6a509950f4", 
        "webqsp_ID": "WebQTrn-1259", 
        "webqsp_question": "where did brad paisley graduate from college", 
        "machine_question": "where did the artist had a concert tour named Country Nation World Tour graduate from college", 
        "question": "Where did the \"Country Nation World Tour\" concert artist go to college?", 
        "sparql": "PREFIX ns: <http://rdf.freebase.com/ns/>\nSELECT DISTINCT ?x\nWHERE {\nFILTER (?x != ?c)\nFILTER (!isLiteral(?x) OR lang(?x) = '' OR langMatches(lang(?x), 'en'))\n?c ns:music.artist.concert_tours ns:m.010qhfmm . \n?c ns:people.person.education ?y .\n?y ns:education.education.institution ?x .\n?x ns:common.topic.notable_types ns:m.01y2hnl .\n?y ns:education.education.degree ns:m.019v9k .\n}\n", 
        "compositionality_type": "composition", 
        "answers": [
            {
                "answer": "Belmont University", 
                "answer_id": "m.01qdhx", 
                "aliases": [
                    "Belmont University, main campus", 
                    "Belmont"
                ]
            }
        ], 
        "created": "2018-02-12T21:58:58"
    }, 
    {
        "ID": "WebQTrn-2272_dfad75afd3c40503f595b4cb6acc43a5", 
        "webqsp_ID": "WebQTrn-2272", 
        "webqsp_question": "what is the president of france 's name", 
        "machine_question": "what is the president of the location that appointed Nicolas Sarkozy to govermental position 's name", 
        "question": "What is the name of the president of the geographic location where Nicolas Sarkozy was appointed to a governmental position?", 
        "sparql": "PREFIX ns: <http://rdf.freebase.com/ns/>\nSELECT DISTINCT ?x\nWHERE {\nFILTER (?x != ?c)\nFILTER (!isLiteral(?x) OR lang(?x) = '' OR langMatches(lang(?x), 'en'))\n?c ns:government.governmental_jurisdiction.governing_officials ?k .\n?k ns:government.government_position_held.appointed_by ns:m.02ps9k . \n?c ns:government.governmental_jurisdiction.governing_officials ?y .\n?y ns:government.government_position_held.office_holder ?x .\n?y ns:government.government_position_held.basic_title ns:m.060c4 .\nFILTER(NOT EXISTS {?y ns:government.government_position_held.from ?sk0} || \nEXISTS {?y ns:government.government_position_held.from ?sk1 . \nFILTER(xsd:datetime(?sk1) <= \"2015-08-10\"^^xsd:dateTime) })\nFILTER(NOT EXISTS {?y ns:government.government_position_held.to ?sk2} || \nEXISTS {?y ns:government.government_position_held.to ?sk3 . \nFILTER(xsd:datetime(?sk3) >= \"2015-08-10\"^^xsd:dateTime) })\n}\n", 
        "compositionality_type": "composition", 
        "answers": [
            {
                "answer": "Fran\u00e7ois Hollande", 
                "answer_id": "m.02qg4z", 
                "aliases": [
                    "Fran\u00e7ois G\u00e9rard Georges Hollande", 
                    "Mayor Fran\u00e7ois Hollande", 
                    "Francois Hollande"
                ]
            }
        ], 
        "created": "2018-02-12T23:40:56"
    }, 
    {
        "ID": "WebQTrn-2449_a2debf685e0c50491e35a9cf7a1e9ade", 
        "webqsp_ID": "WebQTrn-2449", 
        "webqsp_question": "what four countries are in the united kingdom", 
        "machine_question": "what four countries are in the united kingdom and is the country that contains Down District Council", 
        "question": "What country in the United Kingdom contains the Down District Council?", 
        "sparql": "PREFIX ns: <http://rdf.freebase.com/ns/>\nSELECT DISTINCT ?x\nWHERE {\nFILTER (?x != ns:m.07ssc)\nFILTER (!isLiteral(?x) OR lang(?x) = '' OR langMatches(lang(?x), 'en'))\nns:m.07ssc ns:base.aareas.schema.administrative_area.administrative_children ?x .\n?x ns:base.aareas.schema.administrative_area.administrative_area_type ns:m.0hzjlmp .\n?x ns:location.country.administrative_divisions ns:m.02dv8y . \n}", 
        "compositionality_type": "conjunction", 
        "answers": [
            {
                "answer": "Northern Ireland", 
                "answer_id": "m.05bcl", 
                "aliases": [
                    "the occupied six counties", 
                    "the six counties", 
                    "the North of Ireland"
                ]
            }
        ], 
        "created": "2018-02-12T23:58:57"
    }, 
    {
        "ID": "WebQTrn-3727_3d784c638d4b044d17ab942ee87db9cf", 
        "webqsp_ID": "WebQTrn-3727", 
        "webqsp_question": "what is the biggest country in europe by population", 
        "machine_question": "what is the biggest country in the location partially contains Denmark by population", 
        "question": "What is the largest populated country that partially contains Denmark?", 
        "sparql": "PREFIX ns: <http://rdf.freebase.com/ns/>\nSELECT DISTINCT ?x\nWHERE {\nFILTER (?x != ?c)\nFILTER (!isLiteral(?x) OR lang(?x) = '' OR langMatches(lang(?x), 'en'))\n?c ns:location.location.partiallycontains ?k .\n?k ns:location.partial_containment_relationship.partially_contains ns:m.0k6nt . \n?c ns:location.location.contains ?x .\n?x ns:common.topic.notable_types ns:m.01mp .\n?x ns:topic_server.population_number ?sk0 .\n}\nORDER BY DESC(xsd:float(?sk0))\nLIMIT 1\n", 
        "compositionality_type": "composition", 
        "answers": [
            {
                "answer": "Germany", 
                "answer_id": "m.0345h", 
                "aliases": [
                    "Federal Republic of Germany", 
                    "Bundesrepublik Deutschland", 
                    "BRD", 
                    "Deutschland"
                ]
            }
        ], 
        "created": "2018-02-13T02:29:07"
    }, 
    {
        "ID": "WebQTrn-0_4", 
        "webqsp_ID": "WebQTrn-0", 
        "webqsp_question": "what is the name of justin bieber brother", 
        "machine_question": "what is the name of the actor that played the character Alien on TV Monitors #2 brother", 
        "question": "Who is the brother of the actor who played the character Alien on TV Monitors #2?", 
        "sparql": "PREFIX ns: <http://rdf.freebase.com/ns/>\nSELECT DISTINCT ?x\nWHERE {\nFILTER (?x != ?c)\nFILTER (!isLiteral(?x) OR lang(?x) = '' OR langMatches(lang(?x), 'en'))\n?c ns:film.actor.film ?k .\n?k ns:film.performance.character ns:m.0pbzq16 . \n?c ns:people.person.sibling_s ?y .\n?y ns:people.sibling_relationship.sibling ?x .\n?x ns:people.person.gender ns:m.05zppz .\n}\n", 
        "compositionality_type": "composition", 
        "answers": [
            {
                "answer": "Jaxon Bieber", 
                "answer_id": "m.0gxnnwq", 
                "aliases": []
            }
        ], 
        "created": "2017-10-09T10:36:56"
    }, 
    {
        "ID": "WebQTrn-2505_eba9c2e29a1198e8b56c2f7e4210638b", 
        "webqsp_ID": "WebQTrn-2505", 
        "webqsp_question": "what is vanderbilt university mascot", 
        "machine_question": "what is the organiztion leadership has a person named Nicholas S. Zeppos mascot", 
        "question": "What is the mascot of the team that has Nicholas S. Zeppos as its leader?", 
        "sparql": "PREFIX ns: <http://rdf.freebase.com/ns/>\nSELECT DISTINCT ?x\nWHERE {\nFILTER (?x != ?c)\nFILTER (!isLiteral(?x) OR lang(?x) = '' OR langMatches(lang(?x), 'en'))\n?c ns:organization.organization.leadership ?k .\n?k ns:organization.leadership.person ns:m.02vymvp . \n?c ns:education.educational_institution.mascot ?x .\n}\n", 
        "compositionality_type": "composition", 
        "answers": [
            {
                "answer": "Vanderbilt University Mr. Commodore", 
                "answer_id": "m.05k6hxh", 
                "aliases": []
            }
        ], 
        "created": "2018-02-13T00:03:35"
    }, 
    {
        "ID": "WebQTrn-431_593bfb1e8da51c4ccd9f768e8f3acd97", 
        "webqsp_ID": "WebQTrn-431", 
        "webqsp_question": "what is the name of money in brazil", 
        "machine_question": "what is the name of money in the country that contains Rio de Janeiro", 
        "question": "What form of currency is used in the nation where you'd find Rio de Janeiro?", 
        "sparql": "PREFIX ns: <http://rdf.freebase.com/ns/>\nSELECT DISTINCT ?x\nWHERE {\nFILTER (?x != ?c)\nFILTER (!isLiteral(?x) OR lang(?x) = '' OR langMatches(lang(?x), 'en'))\n?c ns:location.country.administrative_divisions ns:m.01hd4s . \n?c ns:location.country.currency_used ?x .\n}\n", 
        "compositionality_type": "composition", 
        "answers": [
            {
                "answer": "Brazilian real", 
                "answer_id": "m.03385m", 
                "aliases": []
            }
        ], 
        "created": "2018-02-12T20:28:35"
    }, 
    {
        "ID": "WebQTrn-401_0db5dafcef666da2d314e42c8fbe8ecf", 
        "webqsp_ID": "WebQTrn-401", 
        "webqsp_question": "where was leonardo da vinci when he died", 
        "machine_question": "where was the illustrator of the book De divina proportione when he died", 
        "question": "Where did the illustrator of \"De Divina Proportione\" die?", 
        "sparql": "PREFIX ns: <http://rdf.freebase.com/ns/>\nSELECT DISTINCT ?x\nWHERE {\nFILTER (?x != ?c)\nFILTER (!isLiteral(?x) OR lang(?x) = '' OR langMatches(lang(?x), 'en'))\n?c ns:book.illustrator.books_illustrated ns:m.06pqb_7 . \n?c ns:people.deceased_person.place_of_death ?x .\n}\n", 
        "compositionality_type": "composition", 
        "answers": [
            {
                "answer": "Amboise", 
                "answer_id": "m.01jvvc", 
                "aliases": [
                    "Amboise, France"
                ]
            }
        ], 
        "created": "2018-02-12T20:21:26"
    }, 
    {
        "ID": "WebQTrn-2591_5bc74979fc1292d14458ccc3a131a6e6", 
        "webqsp_ID": "WebQTrn-2591", 
        "webqsp_question": "who are china 's trading partners", 
        "machine_question": "who are china 's trading partners and the country capital is Khartoum", 
        "question": "Who trades with China and has a capital city called Khartoum?", 
        "sparql": "#MANUAL SPARQL\nPREFIX ns: <http://rdf.freebase.com/ns/>\nSELECT DISTINCT ?x \nWHERE {\n\tFILTER (?x != ns:m.0d05w3)\n\t{ \n\t  ns:m.0d05w3 ns:location.statistical_region.places_exported_to ?y .\n\t  ?y ns:location.imports_and_exports.exported_to ?x . \n\t}\n\tUNION\n\t{\n\t  ns:m.0d05w3 ns:location.statistical_region.places_imported_from ?y .\n\t  ?y ns:location.imports_and_exports.imported_from ?x . \n\t}?x ns:location.country.capital ns:m.04d_m . \n}", 
        "compositionality_type": "conjunction", 
        "answers": [
            {
                "answer": "Sudan", 
                "answer_id": "m.06tw8", 
                "aliases": [
                    "North Sudan", 
                    "Republic of the Sudan", 
                    "Jumh\u016br\u012byat as-S\u016bd\u0101n"
                ]
            }
        ], 
        "created": "2018-02-13T00:17:15"
    }, 
    {
        "ID": "WebQTest-823_ed31f9dd431831dbd32a06b958c7c97c", 
        "webqsp_ID": "WebQTest-823", 
        "webqsp_question": "what does bolivia border", 
        "machine_question": "what does bolivia border and is the country that contains Goi\u00c3\u00a1s", 
        "question": "What country borders Bolivia and contains Goi\u00c3\u00a1s?", 
        "sparql": "PREFIX ns: <http://rdf.freebase.com/ns/>\nSELECT DISTINCT ?x\nWHERE {\nFILTER (?x != ns:m.0165v)\nFILTER (!isLiteral(?x) OR lang(?x) = '' OR langMatches(lang(?x), 'en'))\nns:m.0165v ns:location.location.adjoin_s ?y .\n?y ns:location.adjoining_relationship.adjoins ?x .\n?x ns:location.country.administrative_divisions ns:m.012yz_ . \n}", 
        "compositionality_type": "conjunction", 
        "answers": [
            {
                "answer": "Brazil", 
                "answer_id": "m.015fr", 
                "aliases": [
                    "Brazilian ", 
                    "Rep\u00fablica Federativa do Brasil", 
                    "Brasil", 
                    "Federative Republic of Brazil"
                ]
            }
        ], 
        "created": "2018-02-13T04:12:26"
    }, 
    {
        "ID": "WebQTrn-3693_d0d5f9f0ae25465e1efba1abf9a39089", 
        "webqsp_ID": "WebQTrn-3693", 
        "webqsp_question": "who is the chicago bulls head coach", 
        "machine_question": "who is the the basket ball team head coach is Tom Thibodeau head coach", 
        "question": "Who is the head coach of the basketball team whose head coach is Tom Thibodeau?", 
        "sparql": "PREFIX ns: <http://rdf.freebase.com/ns/>\nSELECT DISTINCT ?x\nWHERE {\nFILTER (?x != ?c)\nFILTER (!isLiteral(?x) OR lang(?x) = '' OR langMatches(lang(?x), 'en'))\n?c ns:basketball.basketball_team.head_coach ns:m.043jv80 . \n?c ns:basketball.basketball_team.head_coach ?x .\n}\n", 
        "compositionality_type": "composition", 
        "answers": [
            {
                "answer": "Tom Thibodeau", 
                "answer_id": "m.043jv80", 
                "aliases": []
            }
        ], 
        "created": "2018-02-13T02:24:09"
    }, 
    {
        "ID": "WebQTest-1502_e156bf65419139d44754fb81aa3e30b8", 
        "webqsp_ID": "WebQTest-1502", 
        "webqsp_question": "what city and state is yale located in", 
        "machine_question": "what city and state is the educational institution newspaper is The Yale Herald located in", 
        "question": "The Yale Herald is the newspaper of the educational institution located where?", 
        "sparql": "PREFIX ns: <http://rdf.freebase.com/ns/>\nSELECT DISTINCT ?x\nWHERE {\nFILTER (?x != ?c)\nFILTER (!isLiteral(?x) OR lang(?x) = '' OR langMatches(lang(?x), 'en'))\n?c ns:education.educational_institution.newspaper ns:m.0544pz . \n?c ns:organization.organization.headquarters ?y .\n?y ns:location.mailing_address.citytown ?x .\n}\n", 
        "compositionality_type": "composition", 
        "answers": [
            {
                "answer": "New Haven", 
                "answer_id": "m.0f2nf", 
                "aliases": [
                    "Elm City", 
                    "New Haven, CT", 
                    "New Haven, Connecticut", 
                    "New Haven, Conn.", 
                    "New Haven County / New Haven city"
                ]
            }
        ], 
        "created": "2018-02-13T05:29:51"
    }, 
    {
        "ID": "WebQTrn-649_393a33dcb20ef2557af16ed69eb41e7a", 
        "webqsp_ID": "WebQTrn-649", 
        "webqsp_question": "what is the capital city of albania", 
        "machine_question": "what is the capital city of the religious organization leadeship is Orthodox Autocephalous Church of Albania", 
        "question": "What is the capital city of the geographic division where the religious organizational leadership is called the Orthodox Autocephalous Church of Albania?", 
        "sparql": "PREFIX ns: <http://rdf.freebase.com/ns/>\nSELECT DISTINCT ?x\nWHERE {\nFILTER (?x != ?c)\nFILTER (!isLiteral(?x) OR lang(?x) = '' OR langMatches(lang(?x), 'en'))\n?c ns:religion.religious_leadership_jurisdiction.leader ?k .\n?k ns:religion.religious_organization_leadership.organization ns:m.06yy_g . \n?c ns:location.country.capital ?x .\n}\n", 
        "compositionality_type": "composition", 
        "answers": [
            {
                "answer": "Tirana", 
                "answer_id": "m.07m_f", 
                "aliases": [
                    "Tirana, Albania"
                ]
            }
        ], 
        "created": "2018-02-12T20:51:43"
    }, 
    {
        "ID": "WebQTrn-3322_1fec20005da44b5d36882c91119c3be3", 
        "webqsp_ID": "WebQTrn-3322", 
        "webqsp_question": "what countries are on the mediterranean sea", 
        "machine_question": "what countries are on the the location partially contains Italy", 
        "question": "Which countries are located in a place that slightly contains Italy?", 
        "sparql": "PREFIX ns: <http://rdf.freebase.com/ns/>\nSELECT DISTINCT ?x\nWHERE {\nFILTER (?x != ?c)\nFILTER (!isLiteral(?x) OR lang(?x) = '' OR langMatches(lang(?x), 'en'))\n?c ns:location.location.partiallycontains ?k .\n?k ns:location.partial_containment_relationship.partially_contains ns:m.03rjj . \n?c ns:location.location.adjoin_s ?y .\n?y ns:location.adjoining_relationship.adjoins ?x .\n?x ns:common.topic.notable_types ns:m.01mp .\n}\n", 
        "compositionality_type": "composition", 
        "answers": [
            {
                "answer": "Turkey", 
                "answer_id": "m.01znc_", 
                "aliases": [
                    "Republic of Turkey", 
                    "T\u00fcrkiye", 
                    "Turkiye"
                ]
            }, 
            {
                "answer": "Monaco", 
                "answer_id": "m.04w58", 
                "aliases": [
                    "Principality of Monaco", 
                    "Monte Carlo"
                ]
            }, 
            {
                "answer": "Spain", 
                "answer_id": "m.06mkj", 
                "aliases": [
                    "Kingdom of Spain", 
                    "Espa\u00f1a", 
                    "Furija"
                ]
            }, 
            {
                "answer": "France", 
                "answer_id": "m.0f8l9c", 
                "aliases": [
                    "l'Hexagone", 
                    "R\u00e9publique fran\u00e7aise", 
                    "French Republic"
                ]
            }
        ], 
        "created": "2018-02-13T01:39:22"
    }, 
    {
        "ID": "WebQTrn-3696_b874dcb19fa3a6c4e6037dc13f1f3bc4", 
        "webqsp_ID": "WebQTrn-3696", 
        "webqsp_question": "who are the two state senators of georgia", 
        "machine_question": "who are the two state senators of georgia and held his govermental position from earliest", 
        "question": "Which state senator from Georgia took this position at the earliest date?", 
        "sparql": "PREFIX ns: <http://rdf.freebase.com/ns/>\nSELECT DISTINCT ?x\nWHERE {\nFILTER (?x != ns:m.0d0x8)\nFILTER (!isLiteral(?x) OR lang(?x) = '' OR langMatches(lang(?x), 'en'))\nns:m.0d0x8 ns:government.political_district.representatives ?y .\n?y ns:government.government_position_held.office_holder ?x .\n?y ns:government.government_position_held.governmental_body ns:m.07t58 .\nFILTER(NOT EXISTS {?y ns:government.government_position_held.from ?sk0} || \nEXISTS {?y ns:government.government_position_held.from ?sk1 . \nFILTER(xsd:datetime(?sk1) <= \"2015-08-10\"^^xsd:dateTime) })\nFILTER(NOT EXISTS {?y ns:government.government_position_held.to ?sk2} || \nEXISTS {?y ns:government.government_position_held.to ?sk3 . \nFILTER(xsd:datetime(?sk3) >= \"2015-08-10\"^^xsd:dateTime) })\n?x ns:government.politician.government_positions_held ?c .\n?c ns:government.government_position_held.from ?num .\n}\nORDER BY ?num LIMIT 1", 
        "compositionality_type": "superlative", 
        "answers": [
            {
                "answer": "Saxby Chambliss", 
                "answer_id": "m.01xcms", 
                "aliases": [
                    "Clarence Saxby Chambliss"
                ]
            }
        ], 
        "created": "2018-02-13T02:25:11"
    }, 
    {
        "ID": "WebQTrn-2181_8d86dc5e03446f0e50fd69bc06ae0658", 
        "webqsp_ID": "WebQTrn-2181", 
        "webqsp_question": "who is the ravens coach", 
        "machine_question": "who is the the sports team owner is Steve Bisciotti coach", 
        "question": "Who is the coach of the team owned by Steve Bisciotti?", 
        "sparql": "PREFIX ns: <http://rdf.freebase.com/ns/>\nSELECT DISTINCT ?x\nWHERE {\nFILTER (?x != ?c)\nFILTER (!isLiteral(?x) OR lang(?x) = '' OR langMatches(lang(?x), 'en'))\n?c ns:sports.professional_sports_team.owner_s ns:m.06x8mf . \n?c ns:american_football.football_team.current_head_coach ?x .\n}\n", 
        "compositionality_type": "composition", 
        "answers": [
            {
                "answer": "John Harbaugh", 
                "answer_id": "m.0c2fvr", 
                "aliases": []
            }
        ], 
        "created": "2018-02-12T23:32:26"
    }, 
    {
        "ID": "WebQTrn-1805_29f5e796d4d3b8d50fd13c5423e9d67a", 
        "webqsp_ID": "WebQTrn-1805", 
        "webqsp_question": "what religion is mary queen of scots", 
        "machine_question": "what religion is the person who once lived in Fotheringhay Castle", 
        "question": "What religion was followed by the person who once lived in Fotheringhay Castle?", 
        "sparql": "PREFIX ns: <http://rdf.freebase.com/ns/>\nSELECT DISTINCT ?x\nWHERE {\nFILTER (?x != ?c)\nFILTER (!isLiteral(?x) OR lang(?x) = '' OR langMatches(lang(?x), 'en'))\n?c ns:people.person.places_lived ?k .\n?k ns:people.place_lived.location ns:m.025s1y5 . \n?c ns:people.person.religion ?x .\n}\n", 
        "compositionality_type": "composition", 
        "answers": [
            {
                "answer": "Catholicism", 
                "answer_id": "m.0c8wxp", 
                "aliases": [
                    "Roman Catholic convert", 
                    "Roman Catholic"
                ]
            }
        ], 
        "created": "2018-02-12T22:53:21"
    }, 
    {
        "ID": "WebQTrn-2074_51ba1687982fdf381c47b15468788107", 
        "webqsp_ID": "WebQTrn-2074", 
        "webqsp_question": "what team did john madden play football for", 
        "machine_question": "what team did john madden play football for and is the team has a team moscot named University of Oregon The Oregon Duck", 
        "question": "What college football team has the mascot of a duck and included John Madden as a former player?", 
        "sparql": "PREFIX ns: <http://rdf.freebase.com/ns/>\nSELECT DISTINCT ?x\nWHERE {\nFILTER (?x != ns:m.0frmb1)\nFILTER (!isLiteral(?x) OR lang(?x) = '' OR langMatches(lang(?x), 'en'))\nns:m.0frmb1 ns:sports.pro_athlete.teams ?y .\n?y ns:sports.sports_team_roster.team ?x .\n?x ns:sports.sports_team.team_mascot ns:m.03d53pb . \n}", 
        "compositionality_type": "conjunction", 
        "answers": [
            {
                "answer": "Oregon Ducks football", 
                "answer_id": "m.0fbq2n", 
                "aliases": [
                    "Oregon Mens Football", 
                    "University of Oregon Mens Football", 
                    "Oregon Men's Football", 
                    "University of Oregon Ducks Mens Football", 
                    "University of Oregon Ducks Men's Football", 
                    "Oregon Ducks Mens Football", 
                    "University of Oregon Ducks Football", 
                    "Oregon Ducks Football", 
                    "University of Oregon Men's Football", 
                    "Oregon Football", 
                    "Oregon Ducks Men's Football", 
                    "University of Oregon Football"
                ]
            }
        ], 
        "created": "2018-02-12T23:22:25"
    }, 
    {
        "ID": "WebQTest-1384_744a496b907e407b16bc5d7c197dc3f0", 
        "webqsp_ID": "WebQTest-1384", 
        "webqsp_question": "what is the predominant religion in israel", 
        "machine_question": "what is the predominant religion in the religious leader is Ovadia Yosef", 
        "question": "What is the predominant religion where the leader is Ovadia Yosef?", 
        "sparql": "PREFIX ns: <http://rdf.freebase.com/ns/>\nSELECT DISTINCT ?x\nWHERE {\nFILTER (?x != ?c)\nFILTER (!isLiteral(?x) OR lang(?x) = '' OR langMatches(lang(?x), 'en'))\n?c ns:religion.religious_leadership_jurisdiction.leader ?k .\n?k ns:religion.religious_organization_leadership.leader ns:m.02qmnw . \n?c ns:location.statistical_region.religions ?y .\n?y ns:location.religion_percentage.religion ?x .\n?y ns:location.religion_percentage.percentage ?sk0 .\n}\nORDER BY DESC(xsd:float(?sk0))\nLIMIT 1\n", 
        "compositionality_type": "composition", 
        "answers": [
            {
                "answer": "Judaism", 
                "answer_id": "m.03_gx", 
                "aliases": [
                    "Jewish"
                ]
            }
        ], 
        "created": "2018-02-13T05:14:50"
    }, 
    {
        "ID": "WebQTrn-2916_96417e4d721f5c0e2c9079454df0af5b", 
        "webqsp_ID": "WebQTrn-2916", 
        "webqsp_question": "what kind of money should i bring to dominican", 
        "machine_question": "what kind of money should i bring to the country that contains El Seibo Province", 
        "question": "What type of money does the country where El Seibo Province is use?", 
        "sparql": "PREFIX ns: <http://rdf.freebase.com/ns/>\nSELECT DISTINCT ?x\nWHERE {\nFILTER (?x != ?c)\nFILTER (!isLiteral(?x) OR lang(?x) = '' OR langMatches(lang(?x), 'en'))\n?c ns:location.country.administrative_divisions ns:m.03xplf . \n?c ns:location.country.currency_used ?x .\n}\n", 
        "compositionality_type": "composition", 
        "answers": [
            {
                "answer": "Dominican peso", 
                "answer_id": "m.04lt7_", 
                "aliases": []
            }
        ], 
        "created": "2018-02-13T00:54:11"
    }, 
    {
        "ID": "WebQTrn-3430_d50047bd776a584de496bc338741909f", 
        "webqsp_ID": "WebQTrn-3430", 
        "webqsp_question": "who created the chinese communist party", 
        "machine_question": "who created the chinese communist party and held his govermental position from 1943-03-20", 
        "question": "Who held his governmental position from March 20, 1943 and created the Chinese Communist Party?", 
        "sparql": "PREFIX ns: <http://rdf.freebase.com/ns/>\nSELECT DISTINCT ?x\nWHERE {\nFILTER (?x != ns:m.02189)\nFILTER (!isLiteral(?x) OR lang(?x) = '' OR langMatches(lang(?x), 'en'))\nns:m.02189 ns:organization.organization.founders ?x .\n?x ns:government.politician.government_positions_held ?c .\n?c ns:government.government_position_held.from \"1943-03-20\"^^xsd:dateTime . \n}", 
        "compositionality_type": "conjunction", 
        "answers": [
            {
                "answer": "Mao Zedong", 
                "answer_id": "m.04xzm", 
                "aliases": [
                    "Chairman Mao", 
                    "Zedong Mao", 
                    "Mao Runzhi", 
                    "The Great Helmsman", 
                    "Mao Tse-Tung"
                ]
            }
        ], 
        "created": "2018-02-13T01:54:29"
    }, 
    {
        "ID": "WebQTest-1829_f5779141967bbbc15b40ea3d5df71e93", 
        "webqsp_ID": "WebQTest-1829", 
        "webqsp_question": "what type of religion did massachusetts have", 
        "machine_question": "what type of religion did massachusetts have and the religion organiztion is Army of the Lord", 
        "question": "What is the religion that has an organization called Army of the Lord and was also the religion of Massachusetts?", 
        "sparql": "PREFIX ns: <http://rdf.freebase.com/ns/>\nSELECT DISTINCT ?x\nWHERE {\nFILTER (?x != ns:m.05k7sb)\nFILTER (!isLiteral(?x) OR lang(?x) = '' OR langMatches(lang(?x), 'en'))\nns:m.05k7sb ns:location.statistical_region.religions ?y .\n?y ns:location.religion_percentage.religion ?x .\n?x ns:religion.religion.organizations ns:m.010hq7jr . \n}", 
        "compositionality_type": "conjunction", 
        "answers": [
            {
                "answer": "Christianity", 
                "answer_id": "m.01lp8", 
                "aliases": [
                    "Christian"
                ]
            }
        ], 
        "created": "2018-02-13T06:07:25"
    }, 
    {
        "ID": "WebQTrn-1073_6137d442d446712c83821b5d4d7ce909", 
        "webqsp_ID": "WebQTrn-1073", 
        "webqsp_question": "what language do people speak in costa rica", 
        "machine_question": "what language do people speak in the currency used in the country is Costa Rican col\u00c3\u00b3n", 
        "question": "People from the country that uses the Costa Rican Colon speak what languages?", 
        "sparql": "PREFIX ns: <http://rdf.freebase.com/ns/>\nSELECT DISTINCT ?x\nWHERE {\nFILTER (?x != ?c)\nFILTER (!isLiteral(?x) OR lang(?x) = '' OR langMatches(lang(?x), 'en'))\n?c ns:location.country.currency_used ns:m.04wccn . \n?c ns:location.country.languages_spoken ?x .\n}\n", 
        "compositionality_type": "composition", 
        "answers": [
            {
                "answer": "Bribri Language", 
                "answer_id": "m.02hwk2m", 
                "aliases": [
                    "Bribri", 
                    "Bribri language", 
                    "Talamanca"
                ]
            }, 
            {
                "answer": "Jamaican Creole English Language", 
                "answer_id": "m.04ygk0", 
                "aliases": [
                    "Patois", 
                    "Patwa", 
                    "Bongo Talk", 
                    "Southwestern Caribbean Creole English", 
                    "Jamaican Creole English", 
                    "Quashie Talk", 
                    "Panamanian Creole English", 
                    "Lim\u00f3n Creole English"
                ]
            }, 
            {
                "answer": "Limonese Creole", 
                "answer_id": "m.06k02z", 
                "aliases": [
                    "Mekatelyu", 
                    "Limon Coastal Creole"
                ]
            }, 
            {
                "answer": "Spanish Language", 
                "answer_id": "m.06nm1", 
                "aliases": [
                    "Espa\u00f1ol", 
                    "Spanish language", 
                    "Castillian", 
                    "Spanish", 
                    "The language of Cervantes", 
                    "Castellano", 
                    "Castillan", 
                    "Castilian"
                ]
            }
        ], 
        "created": "2018-02-12T21:39:12"
    }, 
    {
        "ID": "WebQTrn-934_02aae167a8fa9f7d45daab265ac650cd", 
        "webqsp_ID": "WebQTrn-934", 
        "webqsp_question": "who was the general for the british in the revolutionary war", 
        "machine_question": "who was the general for the british in the revolutionary war and held his govermental position from 1786", 
        "question": "Who held their governmental position from 1786 and was the British General of the Revolutionary War?", 
        "sparql": "PREFIX ns: <http://rdf.freebase.com/ns/>\nSELECT DISTINCT ?x\nWHERE {\nFILTER (?x != ns:m.0jnh)\nFILTER (!isLiteral(?x) OR lang(?x) = '' OR langMatches(lang(?x), 'en'))\nns:m.0jnh ns:military.military_conflict.commanders ?y .\n?y ns:military.military_command.military_commander ?x .\n?x ns:people.person.nationality ns:m.014tss .\n?x ns:government.politician.government_positions_held ?c .\n?c ns:government.government_position_held.from \"1786\"^^xsd:dateTime . \n}", 
        "compositionality_type": "conjunction", 
        "answers": [
            {
                "answer": "Charles Cornwallis, 1st Marquess Cornwallis", 
                "answer_id": "m.09jrf", 
                "aliases": []
            }, 
            {
                "answer": "Charles Cornwallis, 1st Marquess Cornwallis", 
                "answer_id": "m.09jrf", 
                "aliases": []
            }
        ], 
        "created": "2018-02-12T21:22:01"
    }, 
    {
        "ID": "WebQTest-1734_49842e208a5dd584154dd0a96881bc05", 
        "webqsp_ID": "WebQTest-1734", 
        "webqsp_question": "what year did houston rockets win their first championship", 
        "machine_question": "what year did the basket ball team head coach is Kevin McHale win their first championship", 
        "question": "In what year did the basketball team whose head coach is Kevin McHale win their first championship game?", 
        "sparql": "PREFIX ns: <http://rdf.freebase.com/ns/>\nSELECT DISTINCT ?x\nWHERE {\nFILTER (?x != ?c)\nFILTER (!isLiteral(?x) OR lang(?x) = '' OR langMatches(lang(?x), 'en'))\n?c ns:basketball.basketball_team.head_coach ns:m.04b87b . \n?c ns:sports.sports_team.championships ?x .\n?x ns:time.event.start_date ?sk0 .\n}\nORDER BY xsd:datetime(?sk0)\nLIMIT 1\n", 
        "compositionality_type": "composition", 
        "answers": [
            {
                "answer": "1994 NBA Finals", 
                "answer_id": "m.08x9cq", 
                "aliases": []
            }
        ], 
        "created": "2018-02-13T05:51:07"
    }, 
    {
        "ID": "WebQTrn-1246_6aaf65a9b9e1420f46268574f6eb0d03", 
        "webqsp_ID": "WebQTrn-1246", 
        "webqsp_question": "what style of music did jimi hendrix play", 
        "machine_question": "what style of music did the artist had a concert tour named The Cry of Love Tour play", 
        "question": "What style of music did the artist that went to Cry of Love Tour play?", 
        "sparql": "PREFIX ns: <http://rdf.freebase.com/ns/>\nSELECT DISTINCT ?x\nWHERE {\nFILTER (?x != ?c)\nFILTER (!isLiteral(?x) OR lang(?x) = '' OR langMatches(lang(?x), 'en'))\n?c ns:music.artist.concert_tours ns:m.04gkgs_ . \n?c ns:music.artist.genre ?x .\n}\n", 
        "compositionality_type": "composition", 
        "answers": [
            {
                "answer": "Blues", 
                "answer_id": "m.0155w", 
                "aliases": [
                    "Blues music"
                ]
            }, 
            {
                "answer": "Acid rock", 
                "answer_id": "m.02l96k", 
                "aliases": []
            }, 
            {
                "answer": "Blues rock", 
                "answer_id": "m.02yv6b", 
                "aliases": [
                    "Blues rock", 
                    "Blues-rock", 
                    "Rock Blues"
                ]
            }, 
            {
                "answer": "Heavy metal", 
                "answer_id": "m.03lty", 
                "aliases": [
                    "Heavy metal music"
                ]
            }, 
            {
                "answer": "Psychedelic rock", 
                "answer_id": "m.05w3f", 
                "aliases": []
            }, 
            {
                "answer": "Rock music", 
                "answer_id": "m.06by7", 
                "aliases": [
                    "\u05e8\u05d5\u05e7", 
                    "Rock"
                ]
            }, 
            {
                "answer": "Rhythm and blues", 
                "answer_id": "m.06j6l", 
                "aliases": [
                    "R&B", 
                    "RnB"
                ]
            }, 
            {
                "answer": "Experimental rock", 
                "answer_id": "m.08jyyk", 
                "aliases": []
            }, 
            {
                "answer": "Funk rock", 
                "answer_id": "m.09nwwf", 
                "aliases": []
            }, 
            {
                "answer": "Psychedelia", 
                "answer_id": "m.0cgxt", 
                "aliases": []
            }, 
            {
                "answer": "Progressive rock", 
                "answer_id": "m.0dl5d", 
                "aliases": []
            }, 
            {
                "answer": "Hard rock", 
                "answer_id": "m.0xhtw", 
                "aliases": []
            }
        ], 
        "created": "2018-02-12T21:57:24"
    }, 
    {
        "ID": "WebQTest-339_244bb2aa59e57073ae86e6b6cd61e9ad", 
        "webqsp_ID": "WebQTest-339", 
        "webqsp_question": "what nationality is mother teresa", 
        "machine_question": "what nationality is the person who once lived in Rathfarnham", 
        "question": "A person from Rathfarnham is of what nationality?", 
        "sparql": "PREFIX ns: <http://rdf.freebase.com/ns/>\nSELECT DISTINCT ?x\nWHERE {\nFILTER (?x != ?c)\nFILTER (!isLiteral(?x) OR lang(?x) = '' OR langMatches(lang(?x), 'en'))\n?c ns:people.person.places_lived ?k .\n?k ns:people.place_lived.location ns:m.02bm4m . \n?c ns:people.person.nationality ?x .\n}\n", 
        "compositionality_type": "composition", 
        "answers": [
            {
                "answer": "India", 
                "answer_id": "m.03rk0", 
                "aliases": [
                    "Bharat Ganrajya", 
                    "Hindustan", 
                    "Bharat", 
                    "Republic of India", 
                    "The Republic of India"
                ]
            }, 
            {
                "answer": "Ottoman Empire", 
                "answer_id": "m.05kyr", 
                "aliases": [
                    "Osmanl\u0131 \u0130mparatorlu\u011fu", 
                    "Devlet-i \u02bfAliyye-i \u02bfOsm\u00e2niyye"
                ]
            }
        ], 
        "created": "2018-02-13T03:19:45"
    }, 
    {
        "ID": "WebQTrn-2843_8d050e0b9815f52560ec1341f623a650", 
        "webqsp_ID": "WebQTrn-2843", 
        "webqsp_question": "where did jackie robinson go to school", 
        "machine_question": "where did jackie robinson go to school and is the educational institution with the mascot Mustang", 
        "question": "What educational institution that has a mascot named Mustang did Jackie Robinson go to?", 
        "sparql": "PREFIX ns: <http://rdf.freebase.com/ns/>\nSELECT DISTINCT ?x\nWHERE {\nFILTER (?x != ns:m.0443c)\nFILTER (!isLiteral(?x) OR lang(?x) = '' OR langMatches(lang(?x), 'en'))\nns:m.0443c ns:people.person.education ?y .\n?y ns:education.education.institution ?x .\n?x ns:education.educational_institution.mascot ns:m.02_fkk . \n}", 
        "compositionality_type": "conjunction", 
        "answers": [
            {
                "answer": "John Muir High School", 
                "answer_id": "m.084wvj", 
                "aliases": [
                    "John Muir High", 
                    "John Muir High School, Pasadena", 
                    "John Muir High School, main campus"
                ]
            }
        ], 
        "created": "2018-02-13T00:46:47"
    }, 
    {
        "ID": "WebQTrn-2377_0d617679d6e6d2f4a6599b2e2d8aad1f", 
        "webqsp_ID": "WebQTrn-2377", 
        "webqsp_question": "where is colombia the country", 
        "machine_question": "where is the country that has the national anthem National Anthem of Colombia the country", 
        "question": "The nation with National Anthem of Colombia as its national anthem is located in which geographic regions?", 
        "sparql": "PREFIX ns: <http://rdf.freebase.com/ns/>\nSELECT DISTINCT ?x\nWHERE {\nFILTER (?x != ?c)\nFILTER (!isLiteral(?x) OR lang(?x) = '' OR langMatches(lang(?x), 'en'))\n?c ns:location.country.national_anthem ?k .\n?k ns:government.national_anthem_of_a_country.anthem ns:m.01prgy . \n?c ns:location.location.containedby ?x .\n}\n", 
        "compositionality_type": "composition", 
        "answers": [
            {
                "answer": "South America", 
                "answer_id": "m.06n3y", 
                "aliases": [
                    "America"
                ]
            }, 
            {
                "answer": "Americas", 
                "answer_id": "m.07c5l", 
                "aliases": [
                    "New World", 
                    "The Americas", 
                    "America"
                ]
            }
        ], 
        "created": "2018-02-12T23:50:48"
    }, 
    {
        "ID": "WebQTrn-1447_f1ea2e60c0bd4311ef47cc0d7f6c0dd8", 
        "webqsp_ID": "WebQTrn-1447", 
        "webqsp_question": "who did the cleveland browns draft", 
        "machine_question": "who did the cleveland browns draft and is the pro athelete who started hist career on before 2007", 
        "question": "Which professional athletes who began their careers in or before 2007 did the Cleveland Browns draft?", 
        "sparql": "PREFIX ns: <http://rdf.freebase.com/ns/>\nSELECT DISTINCT ?x\nWHERE {\nFILTER (?x != ns:m.01xvb)\nFILTER (!isLiteral(?x) OR lang(?x) = '' OR langMatches(lang(?x), 'en'))\nns:m.01xvb ns:sports.professional_sports_team.draft_picks ?y .\n?y ns:sports.sports_league_draft_pick.player ?x .\n?x ns:sports.pro_athlete.career_start ?num .\nFILTER (?num < \"2007\"^^xsd:dateTime) . \n}", 
        "compositionality_type": "comparative", 
        "answers": [
            {
                "answer": "Jeff Faine", 
                "answer_id": "m.05byjc", 
                "aliases": [
                    "Braylon Jamel Edwards"
                ]
            }, 
            {
                "answer": "Kamerion Wimbley", 
                "answer_id": "m.0cwfp6", 
                "aliases": []
            }, 
            {
                "answer": "Braylon Edwards", 
                "answer_id": "m.03tt9p", 
                "aliases": [
                    "Kellen Boswell Winslow, Jr.", 
                    "Shash", 
                    "Kellen Boswell Winslow", 
                    "Kellen Winslow"
                ]
            }, 
            {
                "answer": "Kellen Winslow II", 
                "answer_id": "m.0bdv4h", 
                "aliases": [
                    "Jeffrey Kalei Faine"
                ]
            }
        ], 
        "created": "2018-02-12T22:18:56"
    }, 
    {
        "ID": "WebQTrn-633_275abff5d62790363fe8bc0387660115", 
        "webqsp_ID": "WebQTrn-633", 
        "webqsp_question": "what language do they denmark", 
        "machine_question": "what language do they the location that appointed Margrethe II of Denmark to govermental position", 
        "question": "What language is spoken in the location that appointed Margrethe II of Denmark to a governmental position?", 
        "sparql": "PREFIX ns: <http://rdf.freebase.com/ns/>\nSELECT DISTINCT ?x\nWHERE {\nFILTER (?x != ?c)\nFILTER (!isLiteral(?x) OR lang(?x) = '' OR langMatches(lang(?x), 'en'))\n?c ns:government.governmental_jurisdiction.governing_officials ?k .\n?k ns:government.government_position_held.appointed_by ns:m.0g2kv . \n?c ns:location.country.languages_spoken ?x .\n}\n", 
        "compositionality_type": "composition", 
        "answers": [
            {
                "answer": "Greenlandic language", 
                "answer_id": "m.02_8gp", 
                "aliases": [
                    "Greenlandic Eskimo", 
                    "Inuktitut, Greenlandic", 
                    "Greenlandic", 
                    "Kalaallisut"
                ]
            }, 
            {
                "answer": "Danish Language", 
                "answer_id": "m.0295r", 
                "aliases": [
                    "D\u00e4nisch", 
                    "Danish", 
                    "Central Danish", 
                    "Dansk", 
                    "Sjaelland"
                ]
            }, 
            {
                "answer": "Faroese", 
                "answer_id": "m.02hrcqd", 
                "aliases": [
                    "F\u00f8royskt", 
                    "Faroese Language"
                ]
            }, 
            {
                "answer": "German Language", 
                "answer_id": "m.04306rv", 
                "aliases": [
                    "German, Standard Language", 
                    "Deutsch", 
                    "German", 
                    "Tedesco", 
                    "High German", 
                    "Hochdeutsch", 
                    "German, Standard"
                ]
            }
        ], 
        "created": "2018-02-12T20:50:26"
    }, 
    {
        "ID": "WebQTest-1363_a61682af60296dc31292d10f056f59d2", 
        "webqsp_ID": "WebQTest-1363", 
        "webqsp_question": "who was jessica simpson married too", 
        "machine_question": "who was jessica simpson married too and is the pro athelete who started hist career on 2000", 
        "question": "What pro athlete married to Jessica Simpson started his career in 2000?", 
        "sparql": "PREFIX ns: <http://rdf.freebase.com/ns/>\nSELECT DISTINCT ?x\nWHERE {\nFILTER (?x != ns:m.0c7xjb)\nFILTER (!isLiteral(?x) OR lang(?x) = '' OR langMatches(lang(?x), 'en'))\nns:m.0c7xjb ns:people.person.spouse_s ?y .\n?y ns:people.marriage.spouse ?x .\n?y ns:people.marriage.type_of_union ns:m.04ztj .\n?x ns:sports.pro_athlete.career_start \"2000\"^^xsd:dateTime . \n}", 
        "compositionality_type": "conjunction", 
        "answers": [
            {
                "answer": "Eric Johnson", 
                "answer_id": "m.081g6c", 
                "aliases": []
            }
        ], 
        "created": "2018-02-13T05:12:22"
    }, 
    {
        "ID": "WebQTrn-453_2326103f221042f024262b19814ee9d3", 
        "webqsp_ID": "WebQTrn-453", 
        "webqsp_question": "what currency do they accept in kenya", 
        "machine_question": "what currency do they accept in the country that has the national anthem Ee Mungu Nguvu Yetu", 
        "question": "The country that has the national anthem Ee Mungu Nguvu Yetu accepts what currency?", 
        "sparql": "PREFIX ns: <http://rdf.freebase.com/ns/>\nSELECT DISTINCT ?x\nWHERE {\nFILTER (?x != ?c)\nFILTER (!isLiteral(?x) OR lang(?x) = '' OR langMatches(lang(?x), 'en'))\n?c ns:location.country.national_anthem ?k .\n?k ns:government.national_anthem_of_a_country.anthem ns:m.04d9t7 . \n?c ns:location.country.currency_used ?x .\n}\n", 
        "compositionality_type": "composition", 
        "answers": [
            {
                "answer": "Kenyan shilling", 
                "answer_id": "m.05yxpb", 
                "aliases": [
                    "Kenya Shilling"
                ]
            }
        ], 
        "created": "2018-02-12T20:29:53"
    }, 
    {
        "ID": "WebQTrn-354_de7f547f53d6df683441d59c9f078de5", 
        "webqsp_ID": "WebQTrn-354", 
        "webqsp_question": "where did deion sanders play baseball", 
        "machine_question": "where did deion sanders play baseball and the sports team owner is George Steinbrenner", 
        "question": "What sports team owned by George  Steinbrenner did Deion Sanders play baseball for?", 
        "sparql": "PREFIX ns: <http://rdf.freebase.com/ns/>\nSELECT DISTINCT ?x\nWHERE {\nFILTER (?x != ns:m.03n69x)\nFILTER (!isLiteral(?x) OR lang(?x) = '' OR langMatches(lang(?x), 'en'))\nns:m.03n69x ns:sports.pro_athlete.teams ?y .\n?y ns:sports.sports_team_roster.team ?x .\n?x ns:sports.sports_team.sport ns:m.018jz .\n?x ns:sports.professional_sports_team.owner_s ns:m.01q5t3 . \n}", 
        "compositionality_type": "conjunction", 
        "answers": [
            {
                "answer": "New York Yankees", 
                "answer_id": "m.0cqt41", 
                "aliases": [
                    "New York Highlanders", 
                    "Baltimore Orioles", 
                    "Bronx Bombers", 
                    "The Yanks", 
                    "Yanks", 
                    "The Pinstripers", 
                    "The Bronx Bombers", 
                    "The Pinstripes", 
                    "Evil Empire", 
                    "The Bombers", 
                    "New York Yankees", 
                    "Damn Yankees", 
                    "The Bronx Zoo", 
                    "Yankees"
                ]
            }
        ], 
        "created": "2018-02-12T20:16:43"
    }, 
    {
        "ID": "WebQTrn-343_29c81279ed9a982e12f82e764083db76", 
        "webqsp_ID": "WebQTrn-343", 
        "webqsp_question": "what films have taylor lautner been in", 
        "machine_question": "what films have taylor lautner been in and a tv series that has 0 season", 
        "question": "Which film had no TV series based on it and starred Taylor Lautner?", 
        "sparql": "PREFIX ns: <http://rdf.freebase.com/ns/>\nSELECT DISTINCT ?x\nWHERE {\nFILTER (?x != ns:m.07ldhs)\nFILTER (!isLiteral(?x) OR lang(?x) = '' OR langMatches(lang(?x), 'en'))\nns:m.07ldhs ns:film.actor.film ?y .\n?y ns:film.performance.film ?x .\n?x ns:tv.tv_series_episode.season_number \"0\" . \n}", 
        "compositionality_type": "conjunction", 
        "answers": [
            {
                "answer": "He's a Bully, Charlie Brown", 
                "answer_id": "m.02686wj", 
                "aliases": [
                    "He's a Bully Charlie Brown"
                ]
            }
        ], 
        "created": "2018-02-12T20:16:15"
    }, 
    {
        "ID": "WebQTest-1427_b18e90832ea61529c16de206eaf1ddfc", 
        "webqsp_ID": "WebQTest-1427", 
        "webqsp_question": "who was the secretary of state when andrew jackson was president", 
        "machine_question": "who was the secretary of state when andrew jackson was president and held his govermental position from 1795", 
        "question": "When Andrew Jackson was president and held his governmental position from 1795, who was the Secretary of State?", 
        "sparql": "PREFIX ns: <http://rdf.freebase.com/ns/>\nSELECT DISTINCT ?x\nWHERE {\nFILTER (?x != ns:m.0rlz)\nFILTER (!isLiteral(?x) OR lang(?x) = '' OR langMatches(lang(?x), 'en'))\nns:m.0rlz ns:government.political_appointer.appointees ?y .\n?y ns:government.government_position_held.office_holder ?x .\n?y ns:government.government_position_held.basic_title ns:m.0789n .\n?x ns:government.politician.government_positions_held ?c .\n?c ns:government.government_position_held.from \"1795\"^^xsd:dateTime . \n}", 
        "compositionality_type": "conjunction", 
        "answers": [
            {
                "answer": "Edward Livingston", 
                "answer_id": "m.01bxb3", 
                "aliases": []
            }
        ], 
        "created": "2018-02-13T05:20:38"
    }, 
    {
        "ID": "WebQTrn-7_e8adb138a65423c2bcb6f7b8a098630c", 
        "webqsp_ID": "WebQTrn-7", 
        "webqsp_question": "where are the nfl redskins from", 
        "machine_question": "where are the nfl the sports team owner is Daniel Snyder from", 
        "question": "What is the home town of the NFL team owned by Daniel Snyder?", 
        "sparql": "PREFIX ns: <http://rdf.freebase.com/ns/>\nSELECT DISTINCT ?x\nWHERE {\nFILTER (?x != ?c)\nFILTER (!isLiteral(?x) OR lang(?x) = '' OR langMatches(lang(?x), 'en'))\n?c ns:sports.professional_sports_team.owner_s ns:m.04pn7c . \n?c ns:sports.sports_team.location ?x .\n}\n", 
        "compositionality_type": "composition", 
        "answers": [
            {
                "answer": "Washington, D.C.", 
                "answer_id": "m.0rh6k", 
                "aliases": [
                    "Washington D.C.", 
                    "Washington", 
                    "The District", 
                    "U.S. Capital", 
                    "District of Columbia / Washington city", 
                    "The District of Columbia", 
                    "District of Columbia", 
                    "Washington DC"
                ]
            }
        ], 
        "created": "2018-02-12T19:37:40"
    }, 
    {
        "ID": "WebQTrn-2475_8beeab4d16cae654aca726b5a38e7f39", 
        "webqsp_ID": "WebQTrn-2475", 
        "webqsp_question": "who plays jacob black in the twilight movies", 
        "machine_question": "who plays jacob black in the the film has a charcter named Tyler Crowley", 
        "question": "In the film with the character named Tyler Crowley, who played Jacob Black?", 
        "sparql": "PREFIX ns: <http://rdf.freebase.com/ns/>\nSELECT DISTINCT ?x\nWHERE {\nFILTER (?x != ?c)\nFILTER (!isLiteral(?x) OR lang(?x) = '' OR langMatches(lang(?x), 'en'))\n?c ns:film.film.starring ?k .\n?k ns:film.performance.character ns:m.05m1x3_ . \n?c ns:film.film.starring ?y .\n?y ns:film.performance.actor ?x .\n?y ns:film.performance.character ns:m.02qd_td .\n}\n", 
        "compositionality_type": "composition", 
        "answers": [
            {
                "answer": "Taylor Lautner", 
                "answer_id": "m.07ldhs", 
                "aliases": [
                    "Taylor Daniel Lautner"
                ]
            }
        ], 
        "created": "2018-02-12T23:59:49"
    }, 
    {
        "ID": "WebQTrn-3622_9a2bafab65209761102f3d33d79454b1", 
        "webqsp_ID": "WebQTrn-3622", 
        "webqsp_question": "what 5 countries border romania", 
        "machine_question": "what 5 countries border romania and is the country that contains Chernivtsi Oblast", 
        "question": "What European country bordering Romania also contains Chernivtsi Oblast?", 
        "sparql": "PREFIX ns: <http://rdf.freebase.com/ns/>\nSELECT DISTINCT ?x\nWHERE {\nFILTER (?x != ns:m.06c1y)\nFILTER (!isLiteral(?x) OR lang(?x) = '' OR langMatches(lang(?x), 'en'))\nns:m.06c1y ns:location.location.adjoin_s ?y .\n?y ns:location.adjoining_relationship.adjoins ?x .\n?x ns:common.topic.notable_types ns:m.01mp .\n?x ns:location.country.administrative_divisions ns:m.01_07_ . \n}", 
        "compositionality_type": "conjunction", 
        "answers": [
            {
                "answer": "Ukraine", 
                "answer_id": "m.07t21", 
                "aliases": [
                    "Ukraine Region"
                ]
            }
        ], 
        "created": "2018-02-13T02:16:37"
    }, 
    {
        "ID": "WebQTrn-453_8c50e30ac5163e6dabfc999a7129a4ea", 
        "webqsp_ID": "WebQTrn-453", 
        "webqsp_question": "what currency do they accept in kenya", 
        "machine_question": "what currency do they accept in the country that contains Rift Valley Province", 
        "question": "Rift Valley Province is located in a nation that uses which form of currency?", 
        "sparql": "PREFIX ns: <http://rdf.freebase.com/ns/>\nSELECT DISTINCT ?x\nWHERE {\nFILTER (?x != ?c)\nFILTER (!isLiteral(?x) OR lang(?x) = '' OR langMatches(lang(?x), 'en'))\n?c ns:location.country.administrative_divisions ns:m.0jm9h . \n?c ns:location.country.currency_used ?x .\n}\n", 
        "compositionality_type": "composition", 
        "answers": [
            {
                "answer": "Kenyan shilling", 
                "answer_id": "m.05yxpb", 
                "aliases": [
                    "Kenya Shilling"
                ]
            }
        ], 
        "created": "2018-02-12T20:29:53"
    }, 
    {
        "ID": "WebQTrn-1231_a712de1420f327914fd5d0dd6e7faaa8", 
        "webqsp_ID": "WebQTrn-1231", 
        "webqsp_question": "what country did osama bin laden live in", 
        "machine_question": "what country did osama bin laden live in and the currency used in the country is Afghan afghani", 
        "question": "What country did Osama bin Laden live in that uses Afghan Afghani?", 
        "sparql": "PREFIX ns: <http://rdf.freebase.com/ns/>\nSELECT DISTINCT ?x\nWHERE {\nFILTER (?x != ns:m.05mg9)\nFILTER (!isLiteral(?x) OR lang(?x) = '' OR langMatches(lang(?x), 'en'))\nns:m.05mg9 ns:people.person.places_lived ?y .\n?y ns:people.place_lived.location ?x .\n?x ns:location.country.currency_used ns:m.019vxc . \n}", 
        "compositionality_type": "conjunction", 
        "answers": [
            {
                "answer": "Afghanistan", 
                "answer_id": "m.0jdd", 
                "aliases": [
                    "Afganistan", 
                    "Islamic Republic of Afghanistan"
                ]
            }
        ], 
        "created": "2018-02-12T21:56:38"
    }, 
    {
        "ID": "WebQTrn-3586_5d57dccf0e15ea5217d602921a92adee", 
        "webqsp_ID": "WebQTrn-3586", 
        "webqsp_question": "what nestle owns", 
        "machine_question": "what the child organization is Nestle Belarusia owns", 
        "question": "What organization is owned by Nestle Belarusia?", 
        "sparql": "PREFIX ns: <http://rdf.freebase.com/ns/>\nSELECT DISTINCT ?x\nWHERE {\nFILTER (?x != ?c)\nFILTER (!isLiteral(?x) OR lang(?x) = '' OR langMatches(lang(?x), 'en'))\n?c ns:organization.organization.child ?k .\n?k ns:organization.organization_relationship.child ns:m.075sdjl . \n?c ns:business.business_operation.industry ?x .\n}\n", 
        "compositionality_type": "composition", 
        "answers": [
            {
                "answer": "Food processing", 
                "answer_id": "m.02vjn0", 
                "aliases": []
            }, 
            {
                "answer": "Ice Cream and Frozen Dessert Manufacturing", 
                "answer_id": "m.03q9wy3", 
                "aliases": []
            }, 
            {
                "answer": "Soft Drink Manufacturing", 
                "answer_id": "m.03q9x41", 
                "aliases": []
            }, 
            {
                "answer": "Bottled Water Manufacturing", 
                "answer_id": "m.03q9x47", 
                "aliases": []
            }, 
            {
                "answer": "Cookies and Crackers", 
                "answer_id": "m.03qtd73", 
                "aliases": []
            }, 
            {
                "answer": "Chocolate and Cocoa Products", 
                "answer_id": "m.03qtd7r", 
                "aliases": []
            }, 
            {
                "answer": "Bottled and Canned Soft Drinks and Carbonated Waters", 
                "answer_id": "m.03qtd9w", 
                "aliases": []
            }
        ], 
        "created": "2018-02-13T02:13:50"
    }, 
    {
        "ID": "WebQTrn-1022_37d11443be6fac4198c20dc3aa292ad8", 
        "webqsp_ID": "WebQTrn-1022", 
        "webqsp_question": "where is azerbaijan", 
        "machine_question": "where is the country that contains Yardymli District", 
        "question": "What country has Yardymli District in it?", 
        "sparql": "PREFIX ns: <http://rdf.freebase.com/ns/>\nSELECT DISTINCT ?x\nWHERE {\nFILTER (?x != ?c)\nFILTER (!isLiteral(?x) OR lang(?x) = '' OR langMatches(lang(?x), 'en'))\n?c ns:location.country.administrative_divisions ns:m.055njn . \n?c ns:base.locations.countries.continent ?x .\n}\n", 
        "compositionality_type": "composition", 
        "answers": [
            {
                "answer": "Eurasia", 
                "answer_id": "m.02qkt", 
                "aliases": []
            }
        ], 
        "created": "2018-02-12T21:32:12"
    }, 
    {
        "ID": "WebQTest-1327_e3691b7d738d0c4fb9da2f1bd4c9b90f", 
        "webqsp_ID": "WebQTest-1327", 
        "webqsp_question": "where is shakira from", 
        "machine_question": "where is the artist had a concert tour named Oral Fixation Tour from", 
        "question": "Where is the Oral Fixation Tour artist from?", 
        "sparql": "PREFIX ns: <http://rdf.freebase.com/ns/>\nSELECT DISTINCT ?x\nWHERE {\nFILTER (?x != ?c)\nFILTER (!isLiteral(?x) OR lang(?x) = '' OR langMatches(lang(?x), 'en'))\n?c ns:music.artist.concert_tours ns:m.0g2n_6 . \n?c ns:music.artist.origin ?x .\n}\n", 
        "compositionality_type": "composition", 
        "answers": [
            {
                "answer": "Colombia", 
                "answer_id": "m.01ls2", 
                "aliases": [
                    "\u30b3\u30ed\u30f3\u30d3\u30a2\u5171\u548c\u56fd", 
                    "Republic of Colombia"
                ]
            }
        ], 
        "created": "2018-02-13T05:06:08"
    }, 
    {
        "ID": "WebQTrn-241_dfb6c97ac9bf2f0ac07f27dd80f9edc2", 
        "webqsp_ID": "WebQTrn-241", 
        "webqsp_question": "what countries share borders with france", 
        "machine_question": "what countries share borders with france and is the location contains and airport that server Nijmegen", 
        "question": "What country bordering France contains an airport that serves Nijmegen?", 
        "sparql": "PREFIX ns: <http://rdf.freebase.com/ns/>\nSELECT DISTINCT ?x\nWHERE {\nFILTER (?x != ns:m.0f8l9c)\nFILTER (!isLiteral(?x) OR lang(?x) = '' OR langMatches(lang(?x), 'en'))\nns:m.0f8l9c ns:location.location.adjoin_s ?y .\n?y ns:location.adjoining_relationship.adjoins ?x .\n?x ns:common.topic.notable_types ns:m.01mp .\n?x ns:location.location.contains ?c .\n?c ns:aviation.airport.serves ns:m.05g2b . \n}", 
        "compositionality_type": "conjunction", 
        "answers": [
            {
                "answer": "Germany", 
                "answer_id": "m.0345h", 
                "aliases": [
                    "Federal Republic of Germany", 
                    "Bundesrepublik Deutschland", 
                    "BRD", 
                    "Deutschland"
                ]
            }
        ], 
        "created": "2018-02-12T20:06:06"
    }, 
    {
        "ID": "WebQTrn-3549_d55b6eb833a7c034b003fbaf53351a7d", 
        "webqsp_ID": "WebQTrn-3549", 
        "webqsp_question": "where did hurricane irene", 
        "machine_question": "where did hurricane irene and is the country that contains Azua Province", 
        "question": "Which nation that has Azua Province within its borders is a place where Hurricane Irene landed?", 
        "sparql": "PREFIX ns: <http://rdf.freebase.com/ns/>\nSELECT DISTINCT ?x\nWHERE {\nFILTER (?x != ns:m.02p70bg)\nFILTER (!isLiteral(?x) OR lang(?x) = '' OR langMatches(lang(?x), 'en'))\nns:m.02p70bg ns:meteorology.tropical_cyclone.affected_areas ?x .\n?x ns:location.country.administrative_divisions ns:m.028cgkl . \n}", 
        "compositionality_type": "conjunction", 
        "answers": [
            {
                "answer": "Dominican Republic", 
                "answer_id": "m.027rn", 
                "aliases": [
                    "Rep\u00fablica Dominicana"
                ]
            }
        ], 
        "created": "2018-02-13T02:11:17"
    }, 
    {
        "ID": "WebQTrn-1827_96417e4d721f5c0e2c9079454df0af5b", 
        "webqsp_ID": "WebQTrn-1827", 
        "webqsp_question": "what is the local currency in the dominican republic", 
        "machine_question": "what is the local currency in the the country that contains El Seibo Province", 
        "question": "What type of currency is used where the El Seibo Province is located?", 
        "sparql": "PREFIX ns: <http://rdf.freebase.com/ns/>\nSELECT DISTINCT ?x\nWHERE {\nFILTER (?x != ?c)\nFILTER (!isLiteral(?x) OR lang(?x) = '' OR langMatches(lang(?x), 'en'))\n?c ns:location.country.administrative_divisions ns:m.03xplf . \n?c ns:location.country.currency_used ?x .\n}\n", 
        "compositionality_type": "composition", 
        "answers": [
            {
                "answer": "Dominican peso", 
                "answer_id": "m.04lt7_", 
                "aliases": []
            }
        ], 
        "created": "2018-02-12T22:54:31"
    }, 
    {
        "ID": "WebQTrn-2349_e831da3802943dad506eb1e3fb611847", 
        "webqsp_ID": "WebQTrn-2349", 
        "webqsp_question": "what is the state bird and flower of michigan", 
        "machine_question": "what is the state bird and flower of the us state that has a capital named Lansing", 
        "question": "What are the official bird and flower of the state whose capital is Lansing?", 
        "sparql": "#MANUAL SPARQL\nPREFIX ns: <http://rdf.freebase.com/ns/>\nSELECT DISTINCT  ?x\nWHERE {\n?c ns:location.us_state.capital ns:m.04pry . \n?c ns:government.governmental_jurisdiction.official_symbols ?y . # Michigan\n  ?y ns:location.location_symbol_relationship.symbol ?x .\n  ?y ns:location.location_symbol_relationship.Kind_of_symbol ?k .\n\n  FILTER (?k = ns:m.04627hw || ?k = ns:m.04627gn)  # State Bird & State Flower\n}", 
        "compositionality_type": "composition", 
        "answers": [
            {
                "answer": "American robin", 
                "answer_id": "m.0hscv", 
                "aliases": [
                    "AMRO"
                ]
            }, 
            {
                "answer": "Apple Blossom", 
                "answer_id": "m.0hzbd21", 
                "aliases": []
            }
        ], 
        "created": "2018-02-12T23:49:00"
    }, 
    {
        "ID": "WebQTrn-608_12214188878adf79aec0d51957fbbc5e", 
        "webqsp_ID": "WebQTrn-608", 
        "webqsp_question": "what is shakira 's nationality", 
        "machine_question": "what is the artist had a concert tour named Tour Anfibio 's nationality", 
        "question": "What is the nationalilty of the artist who had a concert tour named Tour Anfibio's?", 
        "sparql": "PREFIX ns: <http://rdf.freebase.com/ns/>\nSELECT DISTINCT ?x\nWHERE {\nFILTER (?x != ?c)\nFILTER (!isLiteral(?x) OR lang(?x) = '' OR langMatches(lang(?x), 'en'))\n?c ns:music.artist.concert_tours ns:m.09ncdd . \n?c ns:people.person.nationality ?x .\n}\n", 
        "compositionality_type": "composition", 
        "answers": [
            {
                "answer": "Colombia", 
                "answer_id": "m.01ls2", 
                "aliases": [
                    "\u30b3\u30ed\u30f3\u30d3\u30a2\u5171\u548c\u56fd", 
                    "Republic of Colombia"
                ]
            }
        ], 
        "created": "2018-02-12T20:47:54"
    }, 
    {
        "ID": "WebQTrn-1898_43af4daddf93f884aa6724b4a78111a1", 
        "webqsp_ID": "WebQTrn-1898", 
        "webqsp_question": "which countries share borders with spain", 
        "machine_question": "which countries share borders with spain and contains the wine regions that produces Lancers wine style", 
        "question": "Which bordering country of Spain that has the wine regions that produces Lancers wine?", 
        "sparql": "PREFIX ns: <http://rdf.freebase.com/ns/>\nSELECT DISTINCT ?x\nWHERE {\nFILTER (?x != ns:m.06mkj)\nFILTER (!isLiteral(?x) OR lang(?x) = '' OR langMatches(lang(?x), 'en'))\nns:m.06mkj ns:location.location.adjoin_s ?y .\n?y ns:location.adjoining_relationship.adjoins ?x .\n?x ns:common.topic.notable_types ns:m.01mp .\n?x ns:wine.wine_region.wine_styles ns:m.0c4r71 . \n}", 
        "compositionality_type": "conjunction", 
        "answers": [
            {
                "answer": "Portugal", 
                "answer_id": "m.05r4w", 
                "aliases": [
                    "Portuguese Republic"
                ]
            }
        ], 
        "created": "2018-02-12T23:03:58"
    }, 
    {
        "ID": "WebQTrn-1929_de8581ad379fdf8fb0e03c89e19ead1a", 
        "webqsp_ID": "WebQTrn-1929", 
        "webqsp_question": "what year did yankees win their first world series", 
        "machine_question": "what year did the team won the 1999 World Series championship win their first world series", 
        "question": "When did the champion of the 1999 World Series win their first World Series?", 
        "sparql": "PREFIX ns: <http://rdf.freebase.com/ns/>\nSELECT DISTINCT ?x\nWHERE {\nFILTER (?x != ?c)\nFILTER (!isLiteral(?x) OR lang(?x) = '' OR langMatches(lang(?x), 'en'))\n?c ns:sports.sports_team.championships ns:m.04j7wv . \n?c ns:sports.sports_team.championships ?x .\n?x ns:time.event.end_date ?sk0 .\n}\nORDER BY xsd:datetime(?sk0)\nLIMIT 1\n", 
        "compositionality_type": "composition", 
        "answers": [
            {
                "answer": "1923 World Series", 
                "answer_id": "m.04tfv7", 
                "aliases": [
                    "1923 World"
                ]
            }
        ], 
        "created": "2018-02-12T23:08:17"
    }, 
    {
        "ID": "WebQTrn-3450_59208084cbd242d772498015ecdc567b", 
        "webqsp_ID": "WebQTrn-3450", 
        "webqsp_question": "what city is the state capital of washington", 
        "machine_question": "what city is the state capital of the major exports industry Apple tree", 
        "question": "What is the state capital where the major export is Apple trees?", 
        "sparql": "PREFIX ns: <http://rdf.freebase.com/ns/>\nSELECT DISTINCT ?x\nWHERE {\nFILTER (?x != ?c)\nFILTER (!isLiteral(?x) OR lang(?x) = '' OR langMatches(lang(?x), 'en'))\n?c ns:location.statistical_region.major_exports ?k .\n?k ns:location.imports_exports_by_industry.industry ns:m.014j1m . \n?c ns:base.aareas.schema.administrative_area.capital ?x .\n}\n", 
        "compositionality_type": "composition", 
        "answers": [
            {
                "answer": "Olympia", 
                "answer_id": "m.0fw1y", 
                "aliases": [
                    "Thurston County / Olympia city", 
                    "Olympia, Washington"
                ]
            }
        ], 
        "created": "2018-02-13T01:57:40"
    }, 
    {
        "ID": "WebQTrn-2277_f21a9d4b1e98d5b7e3c57e4b34448cfb", 
        "webqsp_ID": "WebQTrn-2277", 
        "webqsp_question": "what money is used in the ukraine", 
        "machine_question": "what money is used in the the country that has the national anthem Shche ne vmerla Ukraina", 
        "question": "The country that has the national anthem Shche ne vmerla Ukraina uses what kind of money?", 
        "sparql": "PREFIX ns: <http://rdf.freebase.com/ns/>\nSELECT DISTINCT ?x\nWHERE {\nFILTER (?x != ?c)\nFILTER (!isLiteral(?x) OR lang(?x) = '' OR langMatches(lang(?x), 'en'))\n?c ns:location.country.national_anthem ?k .\n?k ns:government.national_anthem_of_a_country.anthem ns:m.01kvjf . \n?c ns:location.country.currency_used ?x .\n}\n", 
        "compositionality_type": "composition", 
        "answers": [
            {
                "answer": "Ukrainian hryvnia", 
                "answer_id": "m.035qkb", 
                "aliases": [
                    "Ukrainian Hrivna"
                ]
            }
        ], 
        "created": "2018-02-12T23:42:10"
    }, 
    {
        "ID": "WebQTrn-3509_6227cb6944276fc33277773723769607", 
        "webqsp_ID": "WebQTrn-3509", 
        "webqsp_question": "what is the currency of mexico called", 
        "machine_question": "what is the currency of the country that contains Michoac\u00c3\u00a1n called", 
        "question": "The nation where Michoacan is located uses which form of currency?", 
        "sparql": "PREFIX ns: <http://rdf.freebase.com/ns/>\nSELECT DISTINCT ?x\nWHERE {\nFILTER (?x != ?c)\nFILTER (!isLiteral(?x) OR lang(?x) = '' OR langMatches(lang(?x), 'en'))\n?c ns:location.country.administrative_divisions ns:m.01btry . \n?c ns:location.country.currency_used ?x .\n}\n", 
        "compositionality_type": "composition", 
        "answers": [
            {
                "answer": "Mexican peso", 
                "answer_id": "m.012ts8", 
                "aliases": []
            }
        ], 
        "created": "2018-02-13T02:07:07"
    }, 
    {
        "ID": "WebQTest-665_b945c4d9e0592d6edf3d51db7581f53d", 
        "webqsp_ID": "WebQTest-665", 
        "webqsp_question": "what government does new zealand have", 
        "machine_question": "what government does the country that has the national anthem God Defend New Zealand have", 
        "question": "What type of government is run in the country with the anthem titled \"God Defend New Zealand\"?", 
        "sparql": "PREFIX ns: <http://rdf.freebase.com/ns/>\nSELECT DISTINCT ?x\nWHERE {\nFILTER (?x != ?c)\nFILTER (!isLiteral(?x) OR lang(?x) = '' OR langMatches(lang(?x), 'en'))\n?c ns:location.country.national_anthem ?k .\n?k ns:government.national_anthem_of_a_country.anthem ns:m.03b03 . \n?c ns:location.country.form_of_government ?x .\n}\n", 
        "compositionality_type": "composition", 
        "answers": [
            {
                "answer": "Parliamentary system", 
                "answer_id": "m.018wl5", 
                "aliases": [
                    "Parliamentary", 
                    "Parliamentary Democracy"
                ]
            }, 
            {
                "answer": "Unitary state", 
                "answer_id": "m.01fpfn", 
                "aliases": [
                    "Unitary republic", 
                    "Unitary"
                ]
            }, 
            {
                "answer": "Constitutional monarchy", 
                "answer_id": "m.01q20", 
                "aliases": [
                    "Parliamentary monarchy"
                ]
            }
        ], 
        "created": "2018-02-13T03:58:05"
    }, 
    {
        "ID": "WebQTest-145_ec2b1e4efee18b8fdba9e665a542194d", 
        "webqsp_ID": "WebQTest-145", 
        "webqsp_question": "what college did albert einstein go to", 
        "machine_question": "what college did the person education institution is Luitpold Gymnasium go to", 
        "question": "What college was attended by the famous alumni of Luitpold Gymnasium ?", 
        "sparql": "PREFIX ns: <http://rdf.freebase.com/ns/>\nSELECT DISTINCT ?x\nWHERE {\nFILTER (?x != ?c)\nFILTER (!isLiteral(?x) OR lang(?x) = '' OR langMatches(lang(?x), 'en'))\n?c ns:people.person.education ?k .\n?k ns:education.education.institution ns:m.07yfzw . \n?c ns:people.person.education ?y .\n?y ns:education.education.institution ?x .\n?x ns:common.topic.notable_types ns:m.01y2hnl .\n}\n", 
        "compositionality_type": "composition", 
        "answers": [
            {
                "answer": "ETH Zurich", 
                "answer_id": "m.01dyk8", 
                "aliases": [
                    "ETH Zurich, Z\u00fcrich", 
                    "ETH Z\u00fcrich", 
                    "Swiss Federal Institute of Technology Zurich", 
                    "ETH Zurich, main campus"
                ]
            }, 
            {
                "answer": "University of Zurich", 
                "answer_id": "m.01tpvt", 
                "aliases": [
                    "University of Z\u00fcrich", 
                    "University of Zurich, main campus", 
                    "University of Zurich, Z\u00fcrich"
                ]
            }
        ], 
        "created": "2018-02-13T02:49:12"
    }, 
    {
        "ID": "WebQTrn-1358_89670933168c3f4e5195a241f9d46e76", 
        "webqsp_ID": "WebQTrn-1358", 
        "webqsp_question": "what is the current government of vietnam", 
        "machine_question": "what is the current government of the country that has the national anthem Ti\u00e1\u00ba\u00bfn Qu\u00c3\u00a2n Ca", 
        "question": "What is the type of government where the national anthem is \"Tien Quan Ca\"?", 
        "sparql": "PREFIX ns: <http://rdf.freebase.com/ns/>\nSELECT DISTINCT ?x\nWHERE {\nFILTER (?x != ?c)\nFILTER (!isLiteral(?x) OR lang(?x) = '' OR langMatches(lang(?x), 'en'))\n?c ns:location.country.national_anthem ?k .\n?k ns:government.national_anthem_of_a_country.anthem ns:m.01kvf8 . \n?c ns:location.country.form_of_government ?x .\n}\n", 
        "compositionality_type": "composition", 
        "answers": [
            {
                "answer": "Communist state", 
                "answer_id": "m.01fkst", 
                "aliases": [
                    "Communist"
                ]
            }, 
            {
                "answer": "Socialist state", 
                "answer_id": "m.025tbxf", 
                "aliases": [
                    "Socialist", 
                    "Socialist Republic"
                ]
            }, 
            {
                "answer": "Single-party state", 
                "answer_id": "m.0py4y", 
                "aliases": [
                    "Single-party"
                ]
            }
        ], 
        "created": "2018-02-12T22:09:54"
    }, 
    {
        "ID": "WebQTrn-3763_c707414f103503f2530fc654a85645fe", 
        "webqsp_ID": "WebQTrn-3763", 
        "webqsp_question": "what country is russia close to", 
        "machine_question": "what country is russia close to and the religious organization leadeship is Ukrainian Greek Catholic Church", 
        "question": "What country close to Russia has a religious organization named Ukrainian Greek Catholic Church?", 
        "sparql": "PREFIX ns: <http://rdf.freebase.com/ns/>\nSELECT DISTINCT ?x\nWHERE {\nFILTER (?x != ns:m.06bnz)\nFILTER (!isLiteral(?x) OR lang(?x) = '' OR langMatches(lang(?x), 'en'))\nns:m.06bnz ns:location.location.adjoin_s ?y .\n?y ns:location.adjoining_relationship.adjoins ?x .\n?x ns:common.topic.notable_types ns:m.01mp .\n?x ns:religion.religious_leadership_jurisdiction.leader ?c .\n?c ns:religion.religious_organization_leadership.organization ns:m.02cd38 . \n}", 
        "compositionality_type": "conjunction", 
        "answers": [
            {
                "answer": "Ukraine", 
                "answer_id": "m.07t21", 
                "aliases": [
                    "Ukraine Region"
                ]
            }
        ], 
        "created": "2018-02-13T02:34:32"
    }, 
    {
        "ID": "WebQTrn-1077_f4a9e5f1e0dcfb82cbadf4771eda7bb5", 
        "webqsp_ID": "WebQTrn-1077", 
        "webqsp_question": "what religions are practiced in afghanistan", 
        "machine_question": "what religions are practiced in the country that has the national anthem Afghan National Anthem", 
        "question": "The national anthem Afghan National Anthem is from the country which practices what religions?", 
        "sparql": "PREFIX ns: <http://rdf.freebase.com/ns/>\nSELECT DISTINCT ?x\nWHERE {\nFILTER (?x != ?c)\nFILTER (!isLiteral(?x) OR lang(?x) = '' OR langMatches(lang(?x), 'en'))\n?c ns:location.country.national_anthem ?k .\n?k ns:government.national_anthem_of_a_country.anthem ns:m.02r0hl7 . \n?c ns:location.statistical_region.religions ?y .\n?y ns:location.religion_percentage.religion ?x .\n}\n", 
        "compositionality_type": "composition", 
        "answers": [
            {
                "answer": "Shia Islam", 
                "answer_id": "m.06pq6", 
                "aliases": [
                    "Shiite"
                ]
            }, 
            {
                "answer": "Sunni Islam", 
                "answer_id": "m.078tg", 
                "aliases": [
                    "sunni muslim", 
                    "Ahl \u016bs-Sunnah", 
                    "Sunnites", 
                    "Ahlas-Sunna-Wal-Jamaa", 
                    "Ahl \u016bs-Sunnah wa \u0101l-\u01e6am\u0101\u02bfah", 
                    "sunni", 
                    "Sunnis"
                ]
            }
        ], 
        "created": "2018-02-12T21:40:31"
    }, 
    {
        "ID": "WebQTest-1556_852ae10314bb05a85906d9d65112e76e", 
        "webqsp_ID": "WebQTest-1556", 
        "webqsp_question": "when 's the last time the mets won the world series", 
        "machine_question": "when 's the last time the the team has a team moscot named Mrs. Met won the world series", 
        "question": "When did the sports team whose mascot is Mrs. Met most recently win the World Series?", 
        "sparql": "PREFIX ns: <http://rdf.freebase.com/ns/>\nSELECT DISTINCT ?x\nWHERE {\nFILTER (?x != ?c)\nFILTER (!isLiteral(?x) OR lang(?x) = '' OR langMatches(lang(?x), 'en'))\n?c ns:sports.sports_team.team_mascot ns:m.0w7lzvh . \n?c ns:sports.sports_team.championships ?x .\n?x ns:time.event.end_date ?sk0 .\n}\nORDER BY DESC(xsd:datetime(?sk0))\nLIMIT 1\n", 
        "compositionality_type": "composition", 
        "answers": [
            {
                "answer": "1986 World Series", 
                "answer_id": "m.01q9lc", 
                "aliases": [
                    "1986 World"
                ]
            }
        ], 
        "created": "2018-02-13T05:33:22"
    }, 
    {
        "ID": "WebQTrn-2191_1032b444706847bc45f8df119e2b11dc", 
        "webqsp_ID": "WebQTrn-2191", 
        "webqsp_question": "in what state was the air force academy established", 
        "machine_question": "in what state was the organiztion leadership has a person named Michelle D. Johnson established", 
        "question": "Michelle D. Johnson is a leader of the organization established in what state?", 
        "sparql": "PREFIX ns: <http://rdf.freebase.com/ns/>\nSELECT DISTINCT ?x\nWHERE {\nFILTER (?x != ?c)\nFILTER (!isLiteral(?x) OR lang(?x) = '' OR langMatches(lang(?x), 'en'))\n?c ns:organization.organization.leadership ?k .\n?k ns:organization.leadership.person ns:m.0c56jn . \n?c ns:organization.organization.headquarters ?y .\n?y ns:location.mailing_address.state_province_region ?x .\n}\n", 
        "compositionality_type": "composition", 
        "answers": [
            {
                "answer": "Colorado", 
                "answer_id": "m.01n4w", 
                "aliases": [
                    "Centennial State", 
                    "Colo", 
                    "CO"
                ]
            }
        ], 
        "created": "2018-02-12T23:32:51"
    }, 
    {
        "ID": "WebQTrn-2053_74c5edd9a79d51772446ff4746bd318f", 
        "webqsp_ID": "WebQTrn-2053", 
        "webqsp_question": "what is the official language of china called", 
        "machine_question": "what is the official language of the currency used in the country is Renminbi called", 
        "question": "What is the official language of the country that uses Renminbi as its currency?", 
        "sparql": "PREFIX ns: <http://rdf.freebase.com/ns/>\nSELECT DISTINCT ?x\nWHERE {\nFILTER (?x != ?c)\nFILTER (!isLiteral(?x) OR lang(?x) = '' OR langMatches(lang(?x), 'en'))\n?c ns:location.country.currency_used ns:m.0hn4_ . \n?c ns:location.country.official_language ?x .\n}\n", 
        "compositionality_type": "composition", 
        "answers": [
            {
                "answer": "Standard Chinese", 
                "answer_id": "m.0653m", 
                "aliases": [
                    "Mandarin Chinese", 
                    "Beifang Fangyan", 
                    "Standard Chinese", 
                    "Putonghua", 
                    "Northern Chinese", 
                    "Guoyu", 
                    "Hui", 
                    "Guanhua", 
                    "Hytad", 
                    "Kuoyu", 
                    "Huayu", 
                    "Hanyu", 
                    "Chinese, Mandarin", 
                    "Qotong", 
                    "Mandarin", 
                    "Chinese, Mandarin Language", 
                    "Standard Mandarin", 
                    "Xui", 
                    "Hui-zu", 
                    "Hoton"
                ]
            }
        ], 
        "created": "2018-02-12T23:19:30"
    }, 
    {
        "ID": "WebQTrn-406_cb60fbc3dea230fc32682cbb8556ba62", 
        "webqsp_ID": "WebQTrn-406", 
        "webqsp_question": "what is the religion of israel people", 
        "machine_question": "what is the religion of the location that appointed Benjamin Netanyahu to govermental position people", 
        "question": "What is the religion of the people where Benjamin Netanyahu is in a government position?", 
        "sparql": "PREFIX ns: <http://rdf.freebase.com/ns/>\nSELECT DISTINCT ?x\nWHERE {\nFILTER (?x != ?c)\nFILTER (!isLiteral(?x) OR lang(?x) = '' OR langMatches(lang(?x), 'en'))\n?c ns:government.governmental_jurisdiction.governing_officials ?k .\n?k ns:government.government_position_held.appointed_by ns:m.0fm2h . \n?c ns:location.statistical_region.religions ?y .\n?y ns:location.religion_percentage.religion ?x .\n}\n", 
        "compositionality_type": "composition", 
        "answers": [
            {
                "answer": "Judaism", 
                "answer_id": "m.03_gx", 
                "aliases": [
                    "Jewish"
                ]
            }
        ], 
        "created": "2018-02-12T20:22:50"
    }, 
    {
        "ID": "WebQTest-1102_872253e47dd6ddaa213ff31eeda8783b", 
        "webqsp_ID": "WebQTest-1102", 
        "webqsp_question": "where is victoria british columbia", 
        "machine_question": "where is victoria british columbia and the location time zone is Eastern Time Zone", 
        "question": "What North American country located within Eastern Time Zone includes the city of Victoria, British Columbia?", 
        "sparql": "PREFIX ns: <http://rdf.freebase.com/ns/>\nSELECT DISTINCT ?x\nWHERE {\nFILTER (?x != ns:m.07ypt)\nFILTER (!isLiteral(?x) OR lang(?x) = '' OR langMatches(lang(?x), 'en'))\nns:m.07ypt ns:location.location.containedby ?x .\n?x ns:location.location.time_zones ns:m.02hcv8 . \n}", 
        "compositionality_type": "conjunction", 
        "answers": [
            {
                "answer": "Canada", 
                "answer_id": "m.0d060g", 
                "aliases": [
                    "Dominion of Canada", 
                    "Canuckistan"
                ]
            }
        ], 
        "created": "2018-02-13T04:42:08"
    }, 
    {
        "ID": "WebQTrn-2556_843715b5d1b0569540e0316e66763a38", 
        "webqsp_ID": "WebQTrn-2556", 
        "webqsp_question": "what are some of the religions in australia", 
        "machine_question": "what are some of the religions in australia and the relgion sacred site is Kushinagar", 
        "question": "What religion in Australia has a sacred site named Kishinagar?", 
        "sparql": "PREFIX ns: <http://rdf.freebase.com/ns/>\nSELECT DISTINCT ?x\nWHERE {\nFILTER (?x != ns:m.0chghy)\nFILTER (!isLiteral(?x) OR lang(?x) = '' OR langMatches(lang(?x), 'en'))\nns:m.0chghy ns:location.statistical_region.religions ?y .\n?y ns:location.religion_percentage.religion ?x .\n?x ns:religion.religion.sacred_sites ns:m.01h0lq . \n}", 
        "compositionality_type": "conjunction", 
        "answers": [
            {
                "answer": "Buddhism", 
                "answer_id": "m.092bf5", 
                "aliases": [
                    "Buddhist"
                ]
            }
        ], 
        "created": "2018-02-13T00:08:16"
    }, 
    {
        "ID": "WebQTest-576_01e2da60a2779c4ae4b5d1547499a4f8", 
        "webqsp_ID": "WebQTest-576", 
        "webqsp_question": "what are the 7 countries that are part of central america", 
        "machine_question": "what are the 7 countries that are part of central america and is the country that contains Alta Verapaz Department", 
        "question": "Which nation has the Alta Verapaz Department and is in Central America?", 
        "sparql": "PREFIX ns: <http://rdf.freebase.com/ns/>\nSELECT DISTINCT ?x\nWHERE {\nFILTER (?x != ns:m.01tzh)\nFILTER (!isLiteral(?x) OR lang(?x) = '' OR langMatches(lang(?x), 'en'))\nns:m.01tzh ns:location.location.contains ?x .\n?x ns:common.topic.notable_types ns:m.01mp .\n?x ns:location.country.administrative_divisions ns:m.0146np . \n}", 
        "compositionality_type": "conjunction", 
        "answers": [
            {
                "answer": "Guatemala", 
                "answer_id": "m.0345_", 
                "aliases": [
                    "Guatemala."
                ]
            }
        ], 
        "created": "2018-02-13T03:48:03"
    }, 
    {
        "ID": "WebQTrn-560_09ddfb63672d22c8ffe6222b8e80cf94", 
        "webqsp_ID": "WebQTrn-560", 
        "webqsp_question": "how many teams are there in the ncaa football", 
        "machine_question": "how many teams are there in the ncaa football and is the team won the 1993 College World Series championship", 
        "question": "What NCAA football team won the 1993 College World Series championship?", 
        "sparql": "PREFIX ns: <http://rdf.freebase.com/ns/>\nSELECT DISTINCT ?x\nWHERE {\nFILTER (?x != ns:m.0gh43)\nFILTER (!isLiteral(?x) OR lang(?x) = '' OR langMatches(lang(?x), 'en'))\nns:m.0gh43 ns:sports.sports_league.teams ?y .\n?y ns:sports.sports_league_participation.team ?x .\n?x ns:common.topic.notable_types ns:m.01xljyt .\n?x ns:sports.sports_team.championships ns:m.0287wy5 . \n}", 
        "compositionality_type": "conjunction", 
        "answers": [
            {
                "answer": "LSU Tigers football", 
                "answer_id": "m.0fht9f", 
                "aliases": [
                    "Louisiana State Bayou Bengals Football", 
                    "LSU Fighting Tigers Football", 
                    "Louisiana State University Bayou Bengals Mens Football", 
                    "Louisiana State University Tigers Men's Football", 
                    "Bayou Bengals", 
                    "LSU Fighting Tigers Mens Football", 
                    "Louisiana State University Bayou Bengals Football", 
                    "LSU Bayou Bengals Football", 
                    "LSU Tigers Men's Football", 
                    "Louisiana State Fighting Tigers Men's Football", 
                    "Louisiana State University Fighting Tigers Mens Football", 
                    "Louisiana State University Tigers Mens Football", 
                    "Louisiana State Bayou Bengals Men's Football", 
                    "LSU Bayou Bengals Men's Football", 
                    "Louisiana State University Fighting Tigers Football", 
                    "Louisiana State Fighting Tigers Mens Football", 
                    "Louisiana State Bayou Bengals Mens Football", 
                    "LSU Tigers Mens Football", 
                    "Louisiana State University Bayou Bengals Men's Football", 
                    "Louisiana State Fighting Tigers Football", 
                    "Fighting Tigers", 
                    "Louisiana State University Fighting Tigers Men's Football", 
                    "Louisiana State Tigers Football", 
                    "LSU Fighting Tigers Men's Football", 
                    "Louisiana State Tigers Men's Football", 
                    "LSU Tigers Football", 
                    "Louisiana State Tigers Mens Football", 
                    "LSU Bayou Bengals Mens Football", 
                    "Louisiana State University Tigers Football"
                ]
            }
        ], 
        "created": "2018-02-12T20:43:33"
    }, 
    {
        "ID": "WebQTrn-970_33a7e145f293d98099b1cd924ec3378f", 
        "webqsp_ID": "WebQTrn-970", 
        "webqsp_question": "what type of government does fiji have", 
        "machine_question": "what type of government does the country that has the national anthem God Bless Fiji have", 
        "question": "What is the governmental type in the country where God Bless Fiji is recognized as the national anthem?", 
        "sparql": "PREFIX ns: <http://rdf.freebase.com/ns/>\nSELECT DISTINCT ?x\nWHERE {\nFILTER (?x != ?c)\nFILTER (!isLiteral(?x) OR lang(?x) = '' OR langMatches(lang(?x), 'en'))\n?c ns:location.country.national_anthem ?k .\n?k ns:government.national_anthem_of_a_country.anthem ns:m.01n8cb . \n?c ns:location.country.form_of_government ?x .\n}\n", 
        "compositionality_type": "composition", 
        "answers": [
            {
                "answer": "Military dictatorship", 
                "answer_id": "m.012qkq", 
                "aliases": []
            }, 
            {
                "answer": "Military junta", 
                "answer_id": "m.025s5c_", 
                "aliases": []
            }, 
            {
                "answer": "Parliamentary republic", 
                "answer_id": "m.0glnsx", 
                "aliases": [
                    "Parliamentary"
                ]
            }
        ], 
        "created": "2018-02-12T21:28:13"
    }, 
    {
        "ID": "WebQTrn-932_09020cbb000c86fda5910ec084690246", 
        "webqsp_ID": "WebQTrn-932", 
        "webqsp_question": "what are the major religions in russia", 
        "machine_question": "what are the major religions in russia and the relgion sacred site is Mecca", 
        "question": "Which prominent Russia religion has Mecca as a sacred location?", 
        "sparql": "PREFIX ns: <http://rdf.freebase.com/ns/>\nSELECT DISTINCT ?x\nWHERE {\nFILTER (?x != ns:m.06bnz)\nFILTER (!isLiteral(?x) OR lang(?x) = '' OR langMatches(lang(?x), 'en'))\nns:m.06bnz ns:location.statistical_region.religions ?y .\n?y ns:location.religion_percentage.religion ?x .\n?x ns:religion.religion.sacred_sites ns:m.058wp . \n}", 
        "compositionality_type": "conjunction", 
        "answers": [
            {
                "answer": "Islam", 
                "answer_id": "m.0flw86", 
                "aliases": []
            }
        ], 
        "created": "2018-02-12T21:21:48"
    }, 
    {
        "ID": "WebQTest-305_020f93c678f201a55199a0c40d829467", 
        "webqsp_ID": "WebQTest-305", 
        "webqsp_question": "where does bradley walsh live", 
        "machine_question": "where does bradley walsh live and the location time zone is Pacific Time Zone", 
        "question": "In which location, does Bradley Walsh live, where the location time zone, is in the Pacific Time Zone?", 
        "sparql": "PREFIX ns: <http://rdf.freebase.com/ns/>\nSELECT DISTINCT ?x\nWHERE {\nFILTER (?x != ns:m.05h48b)\nFILTER (!isLiteral(?x) OR lang(?x) = '' OR langMatches(lang(?x), 'en'))\nns:m.05h48b ns:people.person.places_lived ?y .\n?y ns:people.place_lived.location ?x .\nFILTER(NOT EXISTS {?y ns:people.place_lived.end_date ?sk0} || \nEXISTS {?y ns:people.place_lived.end_date ?sk1 . \nFILTER(xsd:datetime(?sk1) >= \"2015-08-10\"^^xsd:dateTime) })\nFILTER(NOT EXISTS {?y ns:people.place_lived.start_date ?sk2} || \nEXISTS {?y ns:people.place_lived.start_date ?sk3 . \nFILTER(xsd:datetime(?sk3) <= \"2015-08-10\"^^xsd:dateTime) })\n?x ns:location.location.time_zones ns:m.02lcqs . \n}", 
        "compositionality_type": "conjunction", 
        "answers": [
            {
                "answer": "Los Angeles", 
                "answer_id": "m.030qb3t", 
                "aliases": [
                    "Los Angeles, California, USA", 
                    "LA", 
                    "Los Angeles, California", 
                    "Los Angeles, USA", 
                    "City of Angels", 
                    "L.A.", 
                    "Los Angeles County / Los Angeles city", 
                    "Los Angeles, CA"
                ]
            }
        ], 
        "created": "2018-02-13T03:12:59"
    }, 
    {
        "ID": "WebQTrn-911_bce97f775d11e9e17634619b1a51e310", 
        "webqsp_ID": "WebQTrn-911", 
        "webqsp_question": "where did pres. obama go to school", 
        "machine_question": "where did pres. obama go to school and the educational institution newspaper is Columbia Daily Spectator", 
        "question": "Where did Obama supposedly go to school that has the newspaper the Columbia Daily Spectator?", 
        "sparql": "PREFIX ns: <http://rdf.freebase.com/ns/>\nSELECT DISTINCT ?x\nWHERE {\nFILTER (?x != ns:m.02mjmr)\nFILTER (!isLiteral(?x) OR lang(?x) = '' OR langMatches(lang(?x), 'en'))\nns:m.02mjmr ns:people.person.education ?y .\n?y ns:education.education.institution ?x .\n?x ns:education.educational_institution.newspaper ns:m.0b6q54 . \n}", 
        "compositionality_type": "conjunction", 
        "answers": [
            {
                "answer": "Columbia University", 
                "answer_id": "m.01w5m", 
                "aliases": [
                    "Columbia University, New York City", 
                    "Columbia U", 
                    "Columbia", 
                    "Columbia University, main campus", 
                    "CU"
                ]
            }
        ], 
        "created": "2018-02-12T21:20:04"
    }, 
    {
        "ID": "WebQTrn-1512_52cbd36b86588e3b6e38b0ba8dc53c62", 
        "webqsp_ID": "WebQTrn-1512", 
        "webqsp_question": "what currency should you take to thailand", 
        "machine_question": "what currency should you take to the country that contains Lopburi Province", 
        "question": "The country that contains Lopburi Province would require me to take what type of currency?", 
        "sparql": "PREFIX ns: <http://rdf.freebase.com/ns/>\nSELECT DISTINCT ?x\nWHERE {\nFILTER (?x != ?c)\nFILTER (!isLiteral(?x) OR lang(?x) = '' OR langMatches(lang(?x), 'en'))\n?c ns:location.country.administrative_divisions ns:m.01kjwm . \n?c ns:location.country.currency_used ?x .\n}\n", 
        "compositionality_type": "composition", 
        "answers": [
            {
                "answer": "Thai baht", 
                "answer_id": "m.0mcb5", 
                "aliases": []
            }
        ], 
        "created": "2018-02-12T22:27:31"
    }, 
    {
        "ID": "WebQTrn-3513_2e46111a46d9176e1e8ef418429e90cb", 
        "webqsp_ID": "WebQTrn-3513", 
        "webqsp_question": "what state is the george washington university in", 
        "machine_question": "what state is the the education institution has a grad student named Stephen G. Haines in", 
        "question": "What state is the school where Stephen G. Haines is a grad student in?", 
        "sparql": "PREFIX ns: <http://rdf.freebase.com/ns/>\nSELECT DISTINCT ?x\nWHERE {\nFILTER (?x != ?c)\nFILTER (!isLiteral(?x) OR lang(?x) = '' OR langMatches(lang(?x), 'en'))\n?c ns:education.educational_institution.students_graduates ?k .\n?k ns:education.education.student ns:m.06619nf . \n?c ns:organization.organization.headquarters ?y .\n?y ns:location.mailing_address.state_province_region ?x .\n}\n", 
        "compositionality_type": "composition", 
        "answers": [
            {
                "answer": "Washington, D.C.", 
                "answer_id": "m.0rh6k", 
                "aliases": [
                    "Washington D.C.", 
                    "Washington", 
                    "The District", 
                    "U.S. Capital", 
                    "District of Columbia / Washington city", 
                    "The District of Columbia", 
                    "District of Columbia", 
                    "Washington DC"
                ]
            }
        ], 
        "created": "2018-02-13T02:07:47"
    }, 
    {
        "ID": "WebQTest-847_682800b1263c4a6d5b650e4196fc2b7d", 
        "webqsp_ID": "WebQTest-847", 
        "webqsp_question": "what countries are members of the security council", 
        "machine_question": "what countries are members of the security council and the location time zone is Central European Time Zone", 
        "question": "What Central European Time Zone countries are member of the Security Council?", 
        "sparql": "PREFIX ns: <http://rdf.freebase.com/ns/>\nSELECT DISTINCT ?x\nWHERE {\nFILTER (?x != ns:m.07vnr)\nFILTER (!isLiteral(?x) OR lang(?x) = '' OR langMatches(lang(?x), 'en'))\nns:m.07vnr ns:base.unitednations.united_nations_body.members ?y .\n?y ns:base.unitednations.united_nations_body_membership.member ?x .\nFILTER(NOT EXISTS {?y ns:base.unitednations.united_nations_body_membership.from ?sk0} || \nEXISTS {?y ns:base.unitednations.united_nations_body_membership.from ?sk1 . \nFILTER(xsd:datetime(?sk1) <= \"2015-08-10\"^^xsd:dateTime) })\nFILTER(NOT EXISTS {?y ns:base.unitednations.united_nations_body_membership.to ?sk2} || \nEXISTS {?y ns:base.unitednations.united_nations_body_membership.to ?sk3 . \nFILTER(xsd:datetime(?sk3) >= \"2015-08-10\"^^xsd:dateTime) })\n?x ns:location.location.time_zones ns:m.02llzg . \n}", 
        "compositionality_type": "conjunction", 
        "answers": [
            {
                "answer": "Croatia", 
                "answer_id": "m.01pj7", 
                "aliases": [
                    "Croatie", 
                    "Croacia", 
                    "Republika Hrvatska", 
                    "Hirvatistan", 
                    "Hrvatska", 
                    "Republic of Croatia", 
                    "Kroatien", 
                    "Croatia/Hrvatska", 
                    "ISO 3166-1:HR", 
                    "Croazia", 
                    "Hravatska", 
                    "Cro\u00e1cia", 
                    "Kroatia", 
                    "Crotaia"
                ]
            }, 
            {
                "answer": "France", 
                "answer_id": "m.0f8l9c", 
                "aliases": [
                    "l'Hexagone", 
                    "R\u00e9publique fran\u00e7aise", 
                    "French Republic"
                ]
            }
        ], 
        "created": "2018-02-13T04:15:50"
    }, 
    {
        "ID": "WebQTest-590_6aad73acb74f304bc9acae44314164be", 
        "webqsp_ID": "WebQTest-590", 
        "webqsp_question": "who is in charge of libya now", 
        "machine_question": "who is in charge of the country that has the national anthem Libya, Libya, Libya now", 
        "question": "Which man is the leader of the country that uses Libya, Libya, Libya as its national anthem?", 
        "sparql": "PREFIX ns: <http://rdf.freebase.com/ns/>\nSELECT DISTINCT ?x\nWHERE {\nFILTER (?x != ?c)\nFILTER (!isLiteral(?x) OR lang(?x) = '' OR langMatches(lang(?x), 'en'))\n?c ns:location.country.national_anthem ?k .\n?k ns:government.national_anthem_of_a_country.anthem ns:m.0gg95zf . \n?c ns:government.governmental_jurisdiction.governing_officials ?y .\n?y ns:government.government_position_held.office_holder ?x .\n?y ns:government.government_position_held.office_position_or_title ns:m.0j5wjnc .\nFILTER(NOT EXISTS {?y ns:government.government_position_held.from ?sk0} || \nEXISTS {?y ns:government.government_position_held.from ?sk1 . \nFILTER(xsd:datetime(?sk1) <= \"2015-08-10\"^^xsd:dateTime) })\nFILTER(NOT EXISTS {?y ns:government.government_position_held.to ?sk2} || \nEXISTS {?y ns:government.government_position_held.to ?sk3 . \nFILTER(xsd:datetime(?sk3) >= \"2015-08-10\"^^xsd:dateTime) })\n}\n", 
        "compositionality_type": "composition", 
        "answers": [
            {
                "answer": "Abdullah al-Thani", 
                "answer_id": "m.0_ymzsm", 
                "aliases": [
                    "Abdullah al-Thani", 
                    "Abdullah Al-Thinni", 
                    "Abdullah al-Thanay", 
                    "Abdallah al-Theni", 
                    "Abdallah al-Thinni"
                ]
            }
        ], 
        "created": "2018-02-13T03:49:14"
    }, 
    {
        "ID": "WebQTrn-3251_d8cddfe5e947e414b7735780ef1efff8", 
        "webqsp_ID": "WebQTrn-3251", 
        "webqsp_question": "what college is in greeley colorado", 
        "machine_question": "what college is in greeley colorado and is the education institution has a sports team named Northern Colorado Bears football", 
        "question": "What educational institution has a football sports team named Northern Colorado Bears is in Greeley, Colorado?", 
        "sparql": "PREFIX ns: <http://rdf.freebase.com/ns/>\nSELECT DISTINCT ?x\nWHERE {\nFILTER (?x != ns:m.0rczx)\nFILTER (!isLiteral(?x) OR lang(?x) = '' OR langMatches(lang(?x), 'en'))\nns:m.0rczx ns:location.location.contains ?x .\n?x ns:common.topic.notable_types ns:m.01y2hnl .\n?x ns:education.educational_institution.sports_teams ns:m.0lqj7vt . \n}", 
        "compositionality_type": "conjunction", 
        "answers": [
            {
                "answer": "University of Northern Colorado", 
                "answer_id": "m.01_k7f", 
                "aliases": [
                    "University of Northern Colorado, Greeley", 
                    "UNC", 
                    "UNCO", 
                    "University of Northern Colorado, main campus"
                ]
            }
        ], 
        "created": "2018-02-13T01:31:49"
    }, 
    {
        "ID": "WebQTrn-197_804561da34d46ed80011e5cc366477a3", 
        "webqsp_ID": "WebQTrn-197", 
        "webqsp_question": "what countries did queen victoria rule", 
        "machine_question": "what countries did queen victoria rule and is the location that appointed George IV of the United Kingdom to govermental position", 
        "question": "What country that Queen Victoria ruled that appointed George IV of the UK to a government position?", 
        "sparql": "PREFIX ns: <http://rdf.freebase.com/ns/>\nSELECT DISTINCT ?x\nWHERE {\nFILTER (?x != ns:m.0cw10)\nFILTER (!isLiteral(?x) OR lang(?x) = '' OR langMatches(lang(?x), 'en'))\nns:m.0cw10 ns:government.political_appointer.appointees ?y .\n?y ns:government.government_position_held.jurisdiction_of_office ?x .\n?x ns:government.governmental_jurisdiction.governing_officials ?c .\n?c ns:government.government_position_held.appointed_by ns:m.0b0sx . \n}", 
        "compositionality_type": "conjunction", 
        "answers": [
            {
                "answer": "The Canadas", 
                "answer_id": "m.0jv32", 
                "aliases": []
            }
        ], 
        "created": "2018-02-12T19:59:57"
    }, 
    {
        "ID": "WebQTrn-150_523337b5403215b400d0c4df70ea49a7", 
        "webqsp_ID": "WebQTrn-150", 
        "webqsp_question": "what was nelson mandela 's religion", 
        "machine_question": "what was the person who once lived in Qunu, Eastern Cape 's religion", 
        "question": "What is the religion belief of the person who once lived in Qunu, Eastern Cape?", 
        "sparql": "PREFIX ns: <http://rdf.freebase.com/ns/>\nSELECT DISTINCT ?x\nWHERE {\nFILTER (?x != ?c)\nFILTER (!isLiteral(?x) OR lang(?x) = '' OR langMatches(lang(?x), 'en'))\n?c ns:people.person.places_lived ?k .\n?k ns:people.place_lived.location ns:m.0b3jmh . \n?c ns:people.person.religion ?x .\n}\n", 
        "compositionality_type": "composition", 
        "answers": [
            {
                "answer": "Methodism", 
                "answer_id": "m.051kv", 
                "aliases": [
                    "Methodist Church"
                ]
            }
        ], 
        "created": "2018-02-12T19:51:31"
    }, 
    {
        "ID": "WebQTest-589_97440c6c536f1672835d4cfecf6c698b", 
        "webqsp_ID": "WebQTest-589", 
        "webqsp_question": "what russian language called", 
        "machine_question": "what the country that has the national anthem National Anthem of Russia language called", 
        "question": "What is the name of the language where The National Anthem of Russia is used?", 
        "sparql": "PREFIX ns: <http://rdf.freebase.com/ns/>\nSELECT DISTINCT ?x\nWHERE {\nFILTER (?x != ?c)\nFILTER (!isLiteral(?x) OR lang(?x) = '' OR langMatches(lang(?x), 'en'))\n?c ns:location.country.national_anthem ?k .\n?k ns:government.national_anthem_of_a_country.anthem ns:m.01ptxd . \n?c ns:location.country.official_language ?x .\n}\n", 
        "compositionality_type": "composition", 
        "answers": [
            {
                "answer": "Russian Language", 
                "answer_id": "m.06b_j", 
                "aliases": [
                    "Russian language", 
                    "Russit", 
                    "Eluosi", 
                    "Olossu", 
                    "Russian", 
                    "Russ", 
                    "Russki"
                ]
            }
        ], 
        "created": "2018-02-13T03:49:09"
    }, 
    {
        "ID": "WebQTrn-2246_89ad938188e36a4d053dc1c8cdf90a64", 
        "webqsp_ID": "WebQTrn-2246", 
        "webqsp_question": "what country surrounds spain", 
        "machine_question": "what country surrounds spain and is the location that contains the city/town Lyon", 
        "question": "Lyon is a city/town in what country surrounding Spain?", 
        "sparql": "PREFIX ns: <http://rdf.freebase.com/ns/>\nSELECT DISTINCT ?x\nWHERE {\nFILTER (?x != ns:m.06mkj)\nFILTER (!isLiteral(?x) OR lang(?x) = '' OR langMatches(lang(?x), 'en'))\nns:m.06mkj ns:location.location.adjoin_s ?y .\n?y ns:location.adjoining_relationship.adjoins ?x .\n?x ns:common.topic.notable_types ns:m.01mp .\n?x ns:location.location.contains ?c .\n?c ns:location.mailing_address.citytown ns:m.0dprg . \n}", 
        "compositionality_type": "conjunction", 
        "answers": [
            {
                "answer": "France", 
                "answer_id": "m.0f8l9c", 
                "aliases": [
                    "l'Hexagone", 
                    "R\u00e9publique fran\u00e7aise", 
                    "French Republic"
                ]
            }
        ], 
        "created": "2018-02-12T23:39:01"
    }, 
    {
        "ID": "WebQTest-963_6db07b41dee74826ea7ebcda7dd4482f", 
        "webqsp_ID": "WebQTest-963", 
        "webqsp_question": "who is the miami dolphins quarterback", 
        "machine_question": "who is the the sports team owner is Serena Williams quarterback", 
        "question": "Who is Serena Williams sports team quarterback?", 
        "sparql": "PREFIX ns: <http://rdf.freebase.com/ns/>\nSELECT DISTINCT ?x\nWHERE {\nFILTER (?x != ?c)\nFILTER (!isLiteral(?x) OR lang(?x) = '' OR langMatches(lang(?x), 'en'))\n?c ns:sports.professional_sports_team.owner_s ns:m.015z4j . \n?c ns:sports.sports_team.roster ?y .\n?y ns:sports.sports_team_roster.player ?x .\n?y ns:sports.sports_team_roster.position ns:m.06b1q .\nFILTER(NOT EXISTS {?y ns:sports.sports_team_roster.from ?sk0} || \nEXISTS {?y ns:sports.sports_team_roster.from ?sk1 . \nFILTER(xsd:datetime(?sk1) <= \"2015-08-10\"^^xsd:dateTime) })\nFILTER(NOT EXISTS {?y ns:sports.sports_team_roster.to ?sk2} || \nEXISTS {?y ns:sports.sports_team_roster.to ?sk3 . \nFILTER(xsd:datetime(?sk3) >= \"2015-08-10\"^^xsd:dateTime) })\n}\n", 
        "compositionality_type": "composition", 
        "answers": [
            {
                "answer": "Matt Moore", 
                "answer_id": "m.027n35s", 
                "aliases": [
                    "Matthew Erickson Moore"
                ]
            }, 
            {
                "answer": "Ryan Tannehill", 
                "answer_id": "m.04q9syl", 
                "aliases": [
                    "Ryan Timothy Tannehill"
                ]
            }
        ], 
        "created": "2018-02-13T04:28:16"
    }, 
    {
        "ID": "WebQTrn-768_cf9ffbb57f2b9e73dca2d2492121f242", 
        "webqsp_ID": "WebQTrn-768", 
        "webqsp_question": "what system of government is used in south korea", 
        "machine_question": "what system of government is used in the country that contains Ulsan", 
        "question": "The country that includes Ulsan uses what system of government?", 
        "sparql": "PREFIX ns: <http://rdf.freebase.com/ns/>\nSELECT DISTINCT ?x\nWHERE {\nFILTER (?x != ?c)\nFILTER (!isLiteral(?x) OR lang(?x) = '' OR langMatches(lang(?x), 'en'))\n?c ns:location.country.administrative_divisions ns:m.01vsdq . \n?c ns:location.country.form_of_government ?x .\n}\n", 
        "compositionality_type": "composition", 
        "answers": [
            {
                "answer": "Presidential system", 
                "answer_id": "m.01d9r3", 
                "aliases": [
                    "Presidential"
                ]
            }, 
            {
                "answer": "Unitary state", 
                "answer_id": "m.01fpfn", 
                "aliases": [
                    "Unitary republic", 
                    "Unitary"
                ]
            }, 
            {
                "answer": "Constitutional republic", 
                "answer_id": "m.0c9rw5", 
                "aliases": [
                    "Constitutional"
                ]
            }
        ], 
        "created": "2018-02-12T21:01:05"
    }, 
    {
        "ID": "WebQTrn-1946_89ad938188e36a4d053dc1c8cdf90a64", 
        "webqsp_ID": "WebQTrn-1946", 
        "webqsp_question": "what countries include western europe", 
        "machine_question": "what countries include western europe and is the location that contains the city/town Lyon", 
        "question": "Lyon is a city/town in what Western European country?", 
        "sparql": "PREFIX ns: <http://rdf.freebase.com/ns/>\nSELECT DISTINCT ?x\nWHERE {\nFILTER (?x != ns:m.0852h)\nFILTER (!isLiteral(?x) OR lang(?x) = '' OR langMatches(lang(?x), 'en'))\nns:m.0852h ns:location.location.contains ?x .\n?x ns:base.biblioness.bibs_location.loc_type ?sk0 .\nFILTER (str(?sk0) = \"Country\")\n?x ns:location.location.contains ?c .\n?c ns:location.mailing_address.citytown ns:m.0dprg . \n}", 
        "compositionality_type": "conjunction", 
        "answers": [
            {
                "answer": "France", 
                "answer_id": "m.0f8l9c", 
                "aliases": [
                    "l'Hexagone", 
                    "R\u00e9publique fran\u00e7aise", 
                    "French Republic"
                ]
            }
        ], 
        "created": "2018-02-12T23:09:17"
    }, 
    {
        "ID": "WebQTest-845_42ffcb7805461a6aa9087d302f9fe1f7", 
        "webqsp_ID": "WebQTest-845", 
        "webqsp_question": "who are the virginia senators 2013", 
        "machine_question": "who are the virginia senators 2013 and held his govermental position from 1987-05-01", 
        "question": "Who was the Virginia Senator in 2013 that held his government position from 5-1-1987?", 
        "sparql": "PREFIX ns: <http://rdf.freebase.com/ns/>\nSELECT DISTINCT ?x\nWHERE {\nFILTER (?x != ns:m.07z1m)\nFILTER (!isLiteral(?x) OR lang(?x) = '' OR langMatches(lang(?x), 'en'))\nns:m.07z1m ns:government.political_district.representatives ?y .\n?y ns:government.government_position_held.office_holder ?x .\n?y ns:government.government_position_held.governmental_body ns:m.07t58 .\nFILTER(NOT EXISTS {?y ns:government.government_position_held.from ?sk0} || \nEXISTS {?y ns:government.government_position_held.from ?sk1 . \nFILTER(xsd:datetime(?sk1) <= \"2013-12-31\"^^xsd:dateTime) })\nFILTER(NOT EXISTS {?y ns:government.government_position_held.to ?sk2} || \nEXISTS {?y ns:government.government_position_held.to ?sk3 . \nFILTER(xsd:datetime(?sk3) >= \"2013-01-01\"^^xsd:dateTime) })\n?x ns:government.politician.government_positions_held ?c .\n?c ns:government.government_position_held.from \"1987-05-01\"^^xsd:dateTime . \n}", 
        "compositionality_type": "conjunction", 
        "answers": [
            {
                "answer": "Jim Webb", 
                "answer_id": "m.0574xy", 
                "aliases": [
                    "Jim H. Webb", 
                    "James Webb", 
                    "James H. Webb", 
                    "James Henry Webb", 
                    "James Henry Webb, Jr."
                ]
            }
        ], 
        "created": "2018-02-13T04:15:34"
    }, 
    {
        "ID": "WebQTest-876_a9122e6c3ec58aea7483e18c7074128a", 
        "webqsp_ID": "WebQTest-876", 
        "webqsp_question": "who does japan import from", 
        "machine_question": "who does japan import from and is the country that contains Gilbert Islands", 
        "question": "What country includes the GIlbert Islands and imports good from Japan?", 
        "sparql": "PREFIX ns: <http://rdf.freebase.com/ns/>\nSELECT DISTINCT ?x\nWHERE {\nFILTER (?x != ns:m.03_3d)\nFILTER (!isLiteral(?x) OR lang(?x) = '' OR langMatches(lang(?x), 'en'))\nns:m.03_3d ns:location.statistical_region.places_imported_from ?y .\n?y ns:location.imports_and_exports.imported_from ?x .\n?x ns:location.country.administrative_divisions ns:m.0101msg_ . \n}", 
        "compositionality_type": "conjunction", 
        "answers": [
            {
                "answer": "Kiribati", 
                "answer_id": "m.047t_", 
                "aliases": [
                    "Republic of Kiribati", 
                    "Gilbert Islands"
                ]
            }
        ], 
        "created": "2018-02-13T04:20:52"
    }, 
    {
        "ID": "WebQTrn-1948_f2ac0ed793fc82b685d4c71e78a53a59", 
        "webqsp_ID": "WebQTrn-1948", 
        "webqsp_question": "who is the current president of china 2010", 
        "machine_question": "who is the current president of the tv show The Bride with White Hair was filmed there 2010", 
        "question": "Who is the current president of where the tv show named The Bride with White Hair was filmed in 2010?", 
        "sparql": "PREFIX ns: <http://rdf.freebase.com/ns/>\nSELECT DISTINCT ?x\nWHERE {\nFILTER (?x != ?c)\nFILTER (!isLiteral(?x) OR lang(?x) = '' OR langMatches(lang(?x), 'en'))\n?c ns:tv.tv_location.tv_shows_filmed_here ns:m.0jkvl5n . \n?c ns:government.governmental_jurisdiction.governing_officials ?y .\n?y ns:government.government_position_held.office_holder ?x .\n?y ns:government.government_position_held.basic_title ns:m.060c4 .\nFILTER(NOT EXISTS {?y ns:government.government_position_held.from ?sk0} || \nEXISTS {?y ns:government.government_position_held.from ?sk1 . \nFILTER(xsd:datetime(?sk1) <= \"2010-12-31\"^^xsd:dateTime) })\nFILTER(NOT EXISTS {?y ns:government.government_position_held.to ?sk2} || \nEXISTS {?y ns:government.government_position_held.to ?sk3 . \nFILTER(xsd:datetime(?sk3) >= \"2010-01-01\"^^xsd:dateTime) })\n}\n", 
        "compositionality_type": "composition", 
        "answers": [
            {
                "answer": "Hu Jintao", 
                "answer_id": "m.013my_", 
                "aliases": [
                    "\u80e1\u9326\u6fe4", 
                    "Jintao Hu", 
                    "Hu Jin Tao", 
                    "\u80e1\u9526\u6d9b"
                ]
            }
        ], 
        "created": "2018-02-12T23:10:13"
    }, 
    {
        "ID": "WebQTrn-3079_872253e47dd6ddaa213ff31eeda8783b", 
        "webqsp_ID": "WebQTrn-3079", 
        "webqsp_question": "where does jeb bush live", 
        "machine_question": "where does jeb bush live and the location time zone is Eastern Time Zone", 
        "question": "Where in the Eastern Time Zone does Jeb Bush live?", 
        "sparql": "PREFIX ns: <http://rdf.freebase.com/ns/>\nSELECT DISTINCT ?x\nWHERE {\nFILTER (?x != ns:m.019x9z)\nFILTER (!isLiteral(?x) OR lang(?x) = '' OR langMatches(lang(?x), 'en'))\nns:m.019x9z ns:people.person.places_lived ?y .\n?y ns:people.place_lived.location ?x .\nFILTER(NOT EXISTS {?y ns:people.place_lived.end_date ?sk0} || \nEXISTS {?y ns:people.place_lived.end_date ?sk1 . \nFILTER(xsd:datetime(?sk1) >= \"2015-08-10\"^^xsd:dateTime) })\nFILTER(NOT EXISTS {?y ns:people.place_lived.start_date ?sk2} || \nEXISTS {?y ns:people.place_lived.start_date ?sk3 . \nFILTER(xsd:datetime(?sk3) <= \"2015-08-10\"^^xsd:dateTime) })\n?x ns:location.location.time_zones ns:m.02hcv8 . \n}", 
        "compositionality_type": "conjunction", 
        "answers": [
            {
                "answer": "Coral Gables", 
                "answer_id": "m.0rn8q", 
                "aliases": [
                    "Miami-Dade County / Coral Gables city", 
                    "Coral Gables, Florida"
                ]
            }
        ], 
        "created": "2018-02-13T01:11:54"
    }, 
    {
        "ID": "WebQTrn-2849_8e65d827de2fe8fd8b11773997effdf0", 
        "webqsp_ID": "WebQTrn-2849", 
        "webqsp_question": "where was f scott fitzgerald education", 
        "machine_question": "where was f scott fitzgerald education and the educational institution newspaper is Nassau Weekly", 
        "question": "The Nassau Weekly is the newspaper of which educational institution F Scott Fitzgerald attended?", 
        "sparql": "PREFIX ns: <http://rdf.freebase.com/ns/>\nSELECT DISTINCT ?x\nWHERE {\nFILTER (?x != ns:m.02zjd)\nFILTER (!isLiteral(?x) OR lang(?x) = '' OR langMatches(lang(?x), 'en'))\nns:m.02zjd ns:people.person.education ?y .\n?y ns:education.education.institution ?x .\n?x ns:education.educational_institution.newspaper ns:m.08zwhp . \n}", 
        "compositionality_type": "conjunction", 
        "answers": [
            {
                "answer": "Princeton University", 
                "answer_id": "m.05zl0", 
                "aliases": [
                    "Princeton University, Borough of Princeton", 
                    "Princeton University, main campus", 
                    "Princeton"
                ]
            }
        ], 
        "created": "2018-02-13T00:46:52"
    }, 
    {
        "ID": "WebQTest-686_94de6b54e2bc85073a96d6b21694da65", 
        "webqsp_ID": "WebQTest-686", 
        "webqsp_question": "when the atlanta braves won the world series", 
        "machine_question": "when the the team won the 1995 World Series championship won the world series", 
        "question": "What years did the team who won the 1995 championship win the World Series?", 
        "sparql": "PREFIX ns: <http://rdf.freebase.com/ns/>\nSELECT DISTINCT ?x\nWHERE {\nFILTER (?x != ?c)\nFILTER (!isLiteral(?x) OR lang(?x) = '' OR langMatches(lang(?x), 'en'))\n?c ns:sports.sports_team.championships ns:m.04j712 . \n?c ns:sports.sports_team.championships ?x .\n}\n", 
        "compositionality_type": "composition", 
        "answers": [
            {
                "answer": "1995 World Series", 
                "answer_id": "m.04j712", 
                "aliases": [
                    "1995 World"
                ]
            }
        ], 
        "created": "2018-02-13T03:59:13"
    }, 
    {
        "ID": "WebQTrn-1214_e8b7b55c54a4b3523a2a3036bd255b1a", 
        "webqsp_ID": "WebQTrn-1214", 
        "webqsp_question": "who is the current coach of the chicago bulls", 
        "machine_question": "who is the current coach of the the sports team owner is James D. Stern", 
        "question": "Who is the current coach of the sports team owned by James D. Stern?", 
        "sparql": "PREFIX ns: <http://rdf.freebase.com/ns/>\nSELECT DISTINCT ?x\nWHERE {\nFILTER (?x != ?c)\nFILTER (!isLiteral(?x) OR lang(?x) = '' OR langMatches(lang(?x), 'en'))\n?c ns:sports.professional_sports_team.owner_s ns:m.0ggb8tz . \n?c ns:basketball.basketball_team.head_coach ?x .\n}\n", 
        "compositionality_type": "composition", 
        "answers": [
            {
                "answer": "Tom Thibodeau", 
                "answer_id": "m.043jv80", 
                "aliases": []
            }
        ], 
        "created": "2018-02-12T21:54:37"
    }, 
    {
        "ID": "WebQTrn-1825_3dda6298595e4f26e293908df47bbd2a", 
        "webqsp_ID": "WebQTrn-1825", 
        "webqsp_question": "what division did the baltimore colts play in", 
        "machine_question": "what division did the the team won the 2007 AFC Championship Game championship play in", 
        "question": "Which division did the 2007 AFC champions play in?", 
        "sparql": "PREFIX ns: <http://rdf.freebase.com/ns/>\nSELECT DISTINCT ?x\nWHERE {\nFILTER (?x != ?c)\nFILTER (!isLiteral(?x) OR lang(?x) = '' OR langMatches(lang(?x), 'en'))\n?c ns:sports.sports_team.championships ns:m.0_gt_mg . \n?c ns:american_football.football_team.division ?x .\n}\n", 
        "compositionality_type": "composition", 
        "answers": [
            {
                "answer": "AFC South", 
                "answer_id": "m.068g_2", 
                "aliases": []
            }
        ], 
        "created": "2018-02-12T22:54:21"
    }, 
    {
        "ID": "WebQTrn-2069_0fa727f3b282196eb1097410b4be6818", 
        "webqsp_ID": "WebQTrn-2069", 
        "webqsp_question": "what language chile speak", 
        "machine_question": "what language the location that appointed Michelle Bachelet to govermental position speak", 
        "question": "What language is spoken in the location that appointed Michelle Bachelet to a governmental position speak?", 
        "sparql": "PREFIX ns: <http://rdf.freebase.com/ns/>\nSELECT DISTINCT ?x\nWHERE {\nFILTER (?x != ?c)\nFILTER (!isLiteral(?x) OR lang(?x) = '' OR langMatches(lang(?x), 'en'))\n?c ns:government.governmental_jurisdiction.governing_officials ?k .\n?k ns:government.government_position_held.appointed_by ns:m.03wws_ . \n?c ns:location.country.languages_spoken ?x .\n}\n", 
        "compositionality_type": "composition", 
        "answers": [
            {
                "answer": "Aymara language", 
                "answer_id": "m.01y5tq", 
                "aliases": [
                    "Aymara"
                ]
            }, 
            {
                "answer": "Mapudungun Language", 
                "answer_id": "m.01zn1j", 
                "aliases": [
                    "Mapuche", 
                    "Mapudungu", 
                    "Mapudungun", 
                    "Araucano", 
                    "Maputongo"
                ]
            }, 
            {
                "answer": "Rapa Nui Language", 
                "answer_id": "m.0565hv", 
                "aliases": [
                    "Easter Island", 
                    "Pascuense", 
                    "Rapa Nui"
                ]
            }, 
            {
                "answer": "Spanish Language", 
                "answer_id": "m.06nm1", 
                "aliases": [
                    "Espa\u00f1ol", 
                    "Spanish language", 
                    "Castillian", 
                    "Spanish", 
                    "The language of Cervantes", 
                    "Castellano", 
                    "Castillan", 
                    "Castilian"
                ]
            }, 
            {
                "answer": "Puquina Language", 
                "answer_id": "m.09_sxt", 
                "aliases": [
                    "Puquina"
                ]
            }
        ], 
        "created": "2018-02-12T23:22:00"
    }, 
    {
        "ID": "WebQTrn-1228_d1ba823e9ae370938293b41f7096fc72", 
        "webqsp_ID": "WebQTrn-1228", 
        "webqsp_question": "what style of art did vincent van gogh do", 
        "machine_question": "what style of art did the person education major field of study is Perspective do", 
        "question": "What style of art did the person who majored in Perspective do?", 
        "sparql": "PREFIX ns: <http://rdf.freebase.com/ns/>\nSELECT DISTINCT ?x\nWHERE {\nFILTER (?x != ?c)\nFILTER (!isLiteral(?x) OR lang(?x) = '' OR langMatches(lang(?x), 'en'))\n?c ns:people.person.education ?k .\n?k ns:education.education.major_field_of_study ns:m.021hz5 . \n?c ns:visual_art.visual_artist.associated_periods_or_movements ?x .\n}\n", 
        "compositionality_type": "composition", 
        "answers": [
            {
                "answer": "Post-Impressionism", 
                "answer_id": "m.015xrq", 
                "aliases": []
            }
        ], 
        "created": "2018-02-12T21:56:30"
    }, 
    {
        "ID": "WebQTrn-398_d7d303efc1f901f14e6aae2bb469743c", 
        "webqsp_ID": "WebQTrn-398", 
        "webqsp_question": "what states does the missouri river touch", 
        "machine_question": "what states does the missouri river touch and the location time zone is Mountain Time Zone", 
        "question": "Which states does the Missouri River touch, where the location is in the Mountain Time Zone?", 
        "sparql": "PREFIX ns: <http://rdf.freebase.com/ns/>\nSELECT DISTINCT ?x\nWHERE {\nFILTER (?x != ns:m.04ykz)\nFILTER (!isLiteral(?x) OR lang(?x) = '' OR langMatches(lang(?x), 'en'))\nns:m.04ykz ns:location.location.partially_containedby ?x .\n?x ns:base.biblioness.bibs_location.loc_type ?sk0 .\nFILTER (str(?sk0) = \"State\")\n?x ns:location.location.time_zones ns:m.02hczc . \n}", 
        "compositionality_type": "conjunction", 
        "answers": [
            {
                "answer": "Kansas", 
                "answer_id": "m.0488g", 
                "aliases": [
                    "KS", 
                    "KA", 
                    "Kans"
                ]
            }, 
            {
                "answer": "Montana", 
                "answer_id": "m.050l8", 
                "aliases": [
                    "MT", 
                    "Treasure State", 
                    "Mont"
                ]
            }, 
            {
                "answer": "Nebraska", 
                "answer_id": "m.05fhy", 
                "aliases": [
                    "The Cornhusker State", 
                    "NB", 
                    "Neb", 
                    "NE"
                ]
            }, 
            {
                "answer": "North Dakota", 
                "answer_id": "m.05fky", 
                "aliases": [
                    "Peace Garden State", 
                    "N Dak", 
                    "ND"
                ]
            }, 
            {
                "answer": "South Dakota", 
                "answer_id": "m.06mz5", 
                "aliases": [
                    "S Dak", 
                    "Mount Rushmore State", 
                    "SD"
                ]
            }
        ], 
        "created": "2018-02-12T20:21:06"
    }, 
    {
        "ID": "WebQTrn-1268_0cf343aa6b8cdceb4261119034b996c3", 
        "webqsp_ID": "WebQTrn-1268", 
        "webqsp_question": "where is sony headquarters", 
        "machine_question": "where is the child organization is Sony Overseas S.A. headquarters", 
        "question": "Sony Overseas S.A. headquarters is a child organization located where?", 
        "sparql": "PREFIX ns: <http://rdf.freebase.com/ns/>\nSELECT DISTINCT ?x\nWHERE {\nFILTER (?x != ?c)\nFILTER (!isLiteral(?x) OR lang(?x) = '' OR langMatches(lang(?x), 'en'))\n?c ns:organization.organization.child ?k .\n?k ns:organization.organization_relationship.child ns:m.072r9lb . \n?c ns:organization.organization.headquarters ?y .\n?y ns:location.mailing_address.citytown ?x .\n}\n", 
        "compositionality_type": "composition", 
        "answers": [
            {
                "answer": "Minato", 
                "answer_id": "m.024bqj", 
                "aliases": []
            }
        ], 
        "created": "2018-02-12T21:59:33"
    }, 
    {
        "ID": "WebQTest-1203_cb60fbc3dea230fc32682cbb8556ba62", 
        "webqsp_ID": "WebQTest-1203", 
        "webqsp_question": "who is president of israel", 
        "machine_question": "who is president of the location that appointed Benjamin Netanyahu to govermental position", 
        "question": "Whose the president of the region, that appointed Benjamin Netanyahu to a governmental position?", 
        "sparql": "PREFIX ns: <http://rdf.freebase.com/ns/>\nSELECT DISTINCT ?x\nWHERE {\nFILTER (?x != ?c)\nFILTER (!isLiteral(?x) OR lang(?x) = '' OR langMatches(lang(?x), 'en'))\n?c ns:government.governmental_jurisdiction.governing_officials ?k .\n?k ns:government.government_position_held.appointed_by ns:m.0fm2h . \n?c ns:government.governmental_jurisdiction.governing_officials ?y .\n?y ns:government.government_position_held.office_holder ?x .\n?y ns:government.government_position_held.basic_title ns:m.060c4 .\nFILTER(NOT EXISTS {?y ns:government.government_position_held.from ?sk0} || \nEXISTS {?y ns:government.government_position_held.from ?sk1 . \nFILTER(xsd:datetime(?sk1) <= \"2015-08-10\"^^xsd:dateTime) })\nFILTER(NOT EXISTS {?y ns:government.government_position_held.to ?sk2} || \nEXISTS {?y ns:government.government_position_held.to ?sk3 . \nFILTER(xsd:datetime(?sk3) >= \"2015-08-10\"^^xsd:dateTime) })\n}\n", 
        "compositionality_type": "composition", 
        "answers": [
            {
                "answer": "Reuven Rivlin", 
                "answer_id": "m.074knq", 
                "aliases": [
                    "Ruvi Rivlin", 
                    "Rubi Rivlin"
                ]
            }
        ], 
        "created": "2018-02-13T04:54:01"
    }, 
    {
        "ID": "WebQTrn-1938_7322a2a4d46bf36b95bfab4418c9a32b", 
        "webqsp_ID": "WebQTrn-1938", 
        "webqsp_question": "what type of government does israel", 
        "machine_question": "what type of government does the country that contains Northern District", 
        "question": "What type of government is used in the country with Northern District?", 
        "sparql": "PREFIX ns: <http://rdf.freebase.com/ns/>\nSELECT DISTINCT ?x\nWHERE {\nFILTER (?x != ?c)\nFILTER (!isLiteral(?x) OR lang(?x) = '' OR langMatches(lang(?x), 'en'))\n?c ns:location.country.administrative_divisions ns:m.01vz6b . \n?c ns:location.country.form_of_government ?x .\n}\n", 
        "compositionality_type": "composition", 
        "answers": [
            {
                "answer": "Parliamentary system", 
                "answer_id": "m.018wl5", 
                "aliases": [
                    "Parliamentary", 
                    "Parliamentary Democracy"
                ]
            }
        ], 
        "created": "2018-02-12T23:08:49"
    }, 
    {
        "ID": "WebQTest-1525_89ad938188e36a4d053dc1c8cdf90a64", 
        "webqsp_ID": "WebQTest-1525", 
        "webqsp_question": "who were we fighting in the gulf war", 
        "machine_question": "who were we fighting in the gulf war and is the location that contains the city/town Lyon", 
        "question": "The city/town of Lyon is locatedin what country we were fighting in the Gulf War?", 
        "sparql": "PREFIX ns: <http://rdf.freebase.com/ns/>\nSELECT DISTINCT ?x\nWHERE {\nFILTER (?x != ns:m.018w0j)\nFILTER (!isLiteral(?x) OR lang(?x) = '' OR langMatches(lang(?x), 'en'))\nns:m.018w0j ns:military.military_conflict.combatants ?y .\n?y ns:military.military_combatant_group.combatants ?x .\n?x ns:location.location.contains ?c .\n?c ns:location.mailing_address.citytown ns:m.0dprg . \n}", 
        "compositionality_type": "conjunction", 
        "answers": [
            {
                "answer": "France", 
                "answer_id": "m.0f8l9c", 
                "aliases": [
                    "l'Hexagone", 
                    "R\u00e9publique fran\u00e7aise", 
                    "French Republic"
                ]
            }
        ], 
        "created": "2018-02-13T05:31:14"
    }, 
    {
        "ID": "WebQTest-1009_14e6114f92210a14296a30cadec3efd7", 
        "webqsp_ID": "WebQTest-1009", 
        "webqsp_question": "where did george herbert walker bush go to college", 
        "machine_question": "where did the person who once lived in Kennebunkport go to college", 
        "question": "Where did the famous person who once lived in Kennebunkport attend college?", 
        "sparql": "PREFIX ns: <http://rdf.freebase.com/ns/>\nSELECT DISTINCT ?x\nWHERE {\nFILTER (?x != ?c)\nFILTER (!isLiteral(?x) OR lang(?x) = '' OR langMatches(lang(?x), 'en'))\n?c ns:people.person.places_lived ?k .\n?k ns:people.place_lived.location ns:m.01m78r . \n?c ns:people.person.education ?y .\n?y ns:education.education.institution ?x .\n?x ns:common.topic.notable_types ns:m.01y2hnl .\n}\n", 
        "compositionality_type": "composition", 
        "answers": [
            {
                "answer": "University Yale", 
                "answer_id": "m.08815", 
                "aliases": [
                    "Yale University, main campus", 
                    "Yale University", 
                    "Yale University, New Haven", 
                    "YU", 
                    "Yale"
                ]
            }
        ], 
        "created": "2018-02-13T04:31:11"
    }, 
    {
        "ID": "WebQTrn-1406_7b6c0cc98675b4b7a6638ef625cfa860", 
        "webqsp_ID": "WebQTrn-1406", 
        "webqsp_question": "when did the ny knicks last win a championship", 
        "machine_question": "when did the the team won the 1970 NBA Finals championship last win a championship", 
        "question": "When was the last time the team that won the 1970 NBA Finals win a championship?", 
        "sparql": "PREFIX ns: <http://rdf.freebase.com/ns/>\nSELECT DISTINCT ?x\nWHERE {\nFILTER (?x != ?c)\nFILTER (!isLiteral(?x) OR lang(?x) = '' OR langMatches(lang(?x), 'en'))\n?c ns:sports.sports_team.championships ns:m.0cs1x4 . \n?c ns:sports.sports_team.championships ?x .\n?x ns:time.event.start_date ?sk0 .\n}\nORDER BY DESC(xsd:datetime(?sk0))\nLIMIT 1\n", 
        "compositionality_type": "composition", 
        "answers": [
            {
                "answer": "1973 NBA Finals", 
                "answer_id": "m.0cs1kg", 
                "aliases": []
            }
        ], 
        "created": "2018-02-12T22:14:24"
    }, 
    {
        "ID": "WebQTrn-616_4adbfda75cc498471a8e4d7d9ffb4439", 
        "webqsp_ID": "WebQTrn-616", 
        "webqsp_question": "where did matt barnes play", 
        "machine_question": "where did matt barnes play and is the team won the 2009 NBA Finals championship", 
        "question": "What team did Matt Barnes play on that won the 2009 NBA Finals?", 
        "sparql": "PREFIX ns: <http://rdf.freebase.com/ns/>\nSELECT DISTINCT ?x\nWHERE {\nFILTER (?x != ns:m.07dr3v)\nFILTER (!isLiteral(?x) OR lang(?x) = '' OR langMatches(lang(?x), 'en'))\nns:m.07dr3v ns:sports.pro_athlete.teams ?y .\n?y ns:sports.sports_team_roster.team ?x .\n?x ns:sports.sports_team.championships ns:m.04gg8b0 . \n}", 
        "compositionality_type": "conjunction", 
        "answers": [
            {
                "answer": "Los Angeles Lakers", 
                "answer_id": "m.0jmk7", 
                "aliases": [
                    "Lakeshow", 
                    "LA Lakers", 
                    "Showtime", 
                    "Lakers", 
                    "The Lakers", 
                    "Minneapolis Lakers"
                ]
            }
        ], 
        "created": "2018-02-12T20:48:04"
    }, 
    {
        "ID": "WebQTrn-3548_c352f5de0efe2369ee74ef2a99973561", 
        "webqsp_ID": "WebQTrn-3548", 
        "webqsp_question": "where did charlton heston live", 
        "machine_question": "where did charlton heston live and is the pro athlete born here that started his career 2007", 
        "question": "What city was the birthplace of CHarlton Heston and a famous pro athelte who started their career in 2007?", 
        "sparql": "PREFIX ns: <http://rdf.freebase.com/ns/>\nSELECT DISTINCT ?x\nWHERE {\nFILTER (?x != ns:m.0chsq)\nFILTER (!isLiteral(?x) OR lang(?x) = '' OR langMatches(lang(?x), 'en'))\nns:m.0chsq ns:people.person.places_lived ?y .\n?y ns:people.place_lived.location ?x .\n?x ns:location.location.people_born_here ?c .\n?c ns:sports.pro_athlete.career_start \"2007\"^^xsd:dateTime . \n}", 
        "compositionality_type": "conjunction", 
        "answers": [
            {
                "answer": "Los Angeles", 
                "answer_id": "m.030qb3t", 
                "aliases": [
                    "Los Angeles, California, USA", 
                    "LA", 
                    "Los Angeles, California", 
                    "Los Angeles, USA", 
                    "City of Angels", 
                    "L.A.", 
                    "Los Angeles County / Los Angeles city", 
                    "Los Angeles, CA"
                ]
            }, 
            {
                "answer": "Los Angeles", 
                "answer_id": "m.030qb3t", 
                "aliases": [
                    "Los Angeles, California, USA", 
                    "LA", 
                    "Los Angeles, California", 
                    "Los Angeles, USA", 
                    "City of Angels", 
                    "L.A.", 
                    "Los Angeles County / Los Angeles city", 
                    "Los Angeles, CA"
                ]
            }
        ], 
        "created": "2018-02-13T02:11:08"
    }, 
    {
        "ID": "WebQTest-1526_92f2cf43c174d40942f1c72ba13096e6", 
        "webqsp_ID": "WebQTest-1526", 
        "webqsp_question": "how many languages do they speak in switzerland", 
        "machine_question": "how many languages do they speak in the country that has the national anthem Swiss Psalm", 
        "question": "Which languages are spoken in the country whose national anthem is Swiss Psalm?", 
        "sparql": "PREFIX ns: <http://rdf.freebase.com/ns/>\nSELECT DISTINCT ?x\nWHERE {\nFILTER (?x != ?c)\nFILTER (!isLiteral(?x) OR lang(?x) = '' OR langMatches(lang(?x), 'en'))\n?c ns:location.country.national_anthem ?k .\n?k ns:government.national_anthem_of_a_country.anthem ns:m.01jhkt . \n?c ns:location.country.languages_spoken ?x .\n}\n", 
        "compositionality_type": "composition", 
        "answers": [
            {
                "answer": "Italian Language", 
                "answer_id": "m.02bjrlw", 
                "aliases": [
                    "Italiano", 
                    "Italian"
                ]
            }, 
            {
                "answer": "German Language", 
                "answer_id": "m.04306rv", 
                "aliases": [
                    "German, Standard Language", 
                    "Deutsch", 
                    "German", 
                    "Tedesco", 
                    "High German", 
                    "Hochdeutsch", 
                    "German, Standard"
                ]
            }, 
            {
                "answer": "French", 
                "answer_id": "m.064_8sq", 
                "aliases": [
                    "Francais", 
                    "Fran\u00e7ais", 
                    "French", 
                    "French language"
                ]
            }, 
            {
                "answer": "Romansh language", 
                "answer_id": "m.06ctk", 
                "aliases": [
                    "Rhaeto-romance", 
                    "Romanche", 
                    "Romansh", 
                    "Rheto-romance"
                ]
            }
        ], 
        "created": "2018-02-13T05:31:50"
    }, 
    {
        "ID": "WebQTrn-60_68f0d0ad309d64a4af858a5ef4fb5713", 
        "webqsp_ID": "WebQTrn-60", 
        "webqsp_question": "what countries do people speak portuguese", 
        "machine_question": "what countries do people speak portuguese and is the chile laber percent was once 1.8", 
        "question": "In which countries do the people speak Portuguese, where the child labor percentage was once 1.8?", 
        "sparql": "PREFIX ns: <http://rdf.freebase.com/ns/>\nSELECT DISTINCT ?x\nWHERE {\nFILTER (?x != ns:m.05zjd)\nFILTER (!isLiteral(?x) OR lang(?x) = '' OR langMatches(lang(?x), 'en'))\nns:m.05zjd ns:language.human_language.countries_spoken_in ?x .\n?x ns:location.statistical_region.child_labor_percent ?c .\n?c ns:measurement_unit.dated_percentage.rate \"1.8\" . \n}", 
        "compositionality_type": "conjunction", 
        "answers": [
            {
                "answer": "Mozambique", 
                "answer_id": "m.04wlh", 
                "aliases": [
                    "Republica de Mocambique", 
                    "Republic of Mozambique", 
                    "Mocambique"
                ]
            }
        ], 
        "created": "2018-02-12T19:43:48"
    }, 
    {
        "ID": "WebQTest-100_bf66fd89b6e9fc5fcb96c8b3f7a0e616", 
        "webqsp_ID": "WebQTest-100", 
        "webqsp_question": "what language is spoken in haiti today", 
        "machine_question": "what language is spoken in the country that contains Nord-Ouest Department today", 
        "question": "The people from the country that contains Nord-Ouest Department speak what languages today?", 
        "sparql": "PREFIX ns: <http://rdf.freebase.com/ns/>\nSELECT DISTINCT ?x\nWHERE {\nFILTER (?x != ?c)\nFILTER (!isLiteral(?x) OR lang(?x) = '' OR langMatches(lang(?x), 'en'))\n?c ns:location.country.administrative_divisions ns:m.02g__4 . \n?c ns:location.country.languages_spoken ?x .\n}\n", 
        "compositionality_type": "composition", 
        "answers": [
            {
                "answer": "Haitian Creole", 
                "answer_id": "m.02dhwl", 
                "aliases": [
                    "Haitian Creole French", 
                    "Kreyol", 
                    "Aiysyen", 
                    "Plateau Haitian Creole language"
                ]
            }, 
            {
                "answer": "French", 
                "answer_id": "m.064_8sq", 
                "aliases": [
                    "Francais", 
                    "Fran\u00e7ais", 
                    "French", 
                    "French language"
                ]
            }
        ], 
        "created": "2018-02-13T02:46:16"
    }, 
    {
        "ID": "WebQTest-188_0a7738a6cb9d0593ec59eafb43e19ead", 
        "webqsp_ID": "WebQTest-188", 
        "webqsp_question": "where did bristol palin go to school", 
        "machine_question": "where did bristol palin go to school and is the educational institution with the mascot Bald eagle", 
        "question": "What educational institution with mascot named Bald Eagle did Briston Palin go to?", 
        "sparql": "PREFIX ns: <http://rdf.freebase.com/ns/>\nSELECT DISTINCT ?x\nWHERE {\nFILTER (?x != ns:m.04jg1kh)\nFILTER (!isLiteral(?x) OR lang(?x) = '' OR langMatches(lang(?x), 'en'))\nns:m.04jg1kh ns:people.person.education ?y .\n?y ns:education.education.institution ?x .\n?x ns:education.educational_institution.mascot ns:m.01dx8 . \n}", 
        "compositionality_type": "conjunction", 
        "answers": [
            {
                "answer": "West Anchorage High School", 
                "answer_id": "m.08r1_d", 
                "aliases": [
                    "West Anchorage High"
                ]
            }
        ], 
        "created": "2018-02-13T02:54:31"
    }, 
    {
        "ID": "WebQTrn-2490_863acb2a400c7da6e7d08f1ad7bb967b", 
        "webqsp_ID": "WebQTrn-2490", 
        "webqsp_question": "what is british columbia", 
        "machine_question": "what is the location partially contains Deltaform Mountain", 
        "question": "What location contains a portion of the Deltaform Mountain?", 
        "sparql": "PREFIX ns: <http://rdf.freebase.com/ns/>\nSELECT DISTINCT ?x\nWHERE {\nFILTER (?x != ?c)\nFILTER (!isLiteral(?x) OR lang(?x) = '' OR langMatches(lang(?x), 'en'))\n?c ns:location.location.partiallycontains ?k .\n?k ns:location.partial_containment_relationship.partially_contains ns:m.0300h5 . \n?c ns:base.aareas.schema.administrative_area.administrative_area_type ?x .\n}\n", 
        "compositionality_type": "composition", 
        "answers": [
            {
                "answer": "Canadian province", 
                "answer_id": "m.0hzcdlq", 
                "aliases": []
            }
        ], 
        "created": "2018-02-13T00:02:28"
    }, 
    {
        "ID": "WebQTrn-893_1d1c28cc9c5f4e83f9f932e3615e2391", 
        "webqsp_ID": "WebQTrn-893", 
        "webqsp_question": "what does the name rome mean", 
        "machine_question": "what does the name the city that hosted 1960 Summer Olympics  mean", 
        "question": "What is the meaning of the name of the city that hosted the 1960 Summer Olympics?", 
        "sparql": "PREFIX ns: <http://rdf.freebase.com/ns/>\nSELECT DISTINCT ?x\nWHERE {\nFILTER (?x != ?c)\nFILTER (!isLiteral(?x) OR lang(?x) = '' OR langMatches(lang(?x), 'en'))\n?c ns:olympics.olympic_host_city.olympics_hosted ns:m.0lbd9 . \n?c ns:symbols.namesake.named_after ?x .\n}\n", 
        "compositionality_type": "composition", 
        "answers": [
            {
                "answer": "Romulus and Remus", 
                "answer_id": "m.0ghqr", 
                "aliases": []
            }
        ], 
        "created": "2018-02-12T21:18:40"
    }, 
    {
        "ID": "WebQTrn-3510_dbd7a72f9e20ca9ddc11bd8708a79108", 
        "webqsp_ID": "WebQTrn-3510", 
        "webqsp_question": "what teams did shaq play 4", 
        "machine_question": "what teams did shaq play 4 and the sports team owner is Micky Arison", 
        "question": "What team owned by Micky Arison did Shaq play for?", 
        "sparql": "PREFIX ns: <http://rdf.freebase.com/ns/>\nSELECT DISTINCT ?x\nWHERE {\nFILTER (?x != ns:m.012xdf)\nFILTER (!isLiteral(?x) OR lang(?x) = '' OR langMatches(lang(?x), 'en'))\nns:m.012xdf ns:sports.pro_athlete.teams ?y .\n?y ns:sports.sports_team_roster.team ?x .\n?x ns:sports.professional_sports_team.owner_s ns:m.027f6w . \n}", 
        "compositionality_type": "conjunction", 
        "answers": [
            {
                "answer": "Miami Heat", 
                "answer_id": "m.0jm2v", 
                "aliases": [
                    "Heat", 
                    "The Heatles"
                ]
            }
        ], 
        "created": "2018-02-13T02:07:09"
    }, 
    {
        "ID": "WebQTrn-226_c059d94e1d93d59a2c68112b7c2c4f75", 
        "webqsp_ID": "WebQTrn-226", 
        "webqsp_question": "what 6 states border south dakota", 
        "machine_question": "what 6 states border the place that has the local capital named Pierre", 
        "question": "Which 6 states border the location whose capital is known as Pierre?", 
        "sparql": "PREFIX ns: <http://rdf.freebase.com/ns/>\nSELECT DISTINCT ?x\nWHERE {\nFILTER (?x != ?c)\nFILTER (!isLiteral(?x) OR lang(?x) = '' OR langMatches(lang(?x), 'en'))\n?c ns:location.administrative_division.capital ?k .\n?k ns:location.administrative_division_capital_relationship.capital ns:m.0fw08 . \n?c ns:location.location.adjoin_s ?y .\n?y ns:location.adjoining_relationship.adjoins ?x .\n?x ns:common.topic.notable_types ns:m.0kpys4 .\n}\n", 
        "compositionality_type": "composition", 
        "answers": [
            {
                "answer": "Iowa", 
                "answer_id": "m.03s0w", 
                "aliases": [
                    "IA", 
                    "Hawkeye State", 
                    "IO"
                ]
            }, 
            {
                "answer": "Minnesota", 
                "answer_id": "m.04ykg", 
                "aliases": [
                    "North Star State", 
                    "MN", 
                    "Minn"
                ]
            }, 
            {
                "answer": "Montana", 
                "answer_id": "m.050l8", 
                "aliases": [
                    "MT", 
                    "Treasure State", 
                    "Mont"
                ]
            }, 
            {
                "answer": "Nebraska", 
                "answer_id": "m.05fhy", 
                "aliases": [
                    "The Cornhusker State", 
                    "NB", 
                    "Neb", 
                    "NE"
                ]
            }, 
            {
                "answer": "North Dakota", 
                "answer_id": "m.05fky", 
                "aliases": [
                    "Peace Garden State", 
                    "N Dak", 
                    "ND"
                ]
            }, 
            {
                "answer": "Wyoming", 
                "answer_id": "m.0846v", 
                "aliases": [
                    "WY"
                ]
            }
        ], 
        "created": "2018-02-12T20:02:01"
    }, 
    {
        "ID": "WebQTrn-3246_bd2ff36ea36c4c70eaa9de55db019625", 
        "webqsp_ID": "WebQTrn-3246", 
        "webqsp_question": "what to do today in birmingham uk", 
        "machine_question": "what to do today in birmingham uk and is the zoo that opened on 1974", 
        "question": "What zoo in Birmingham, UK that opened in 1974?", 
        "sparql": "PREFIX ns: <http://rdf.freebase.com/ns/>\nSELECT DISTINCT ?x\nWHERE {\nFILTER (?x != ns:m.0k33p)\nFILTER (!isLiteral(?x) OR lang(?x) = '' OR langMatches(lang(?x), 'en'))\nns:m.0k33p ns:travel.travel_destination.tourist_attractions ?x .\n?x ns:zoos.zoo.opened \"1974\"^^xsd:dateTime . \n}", 
        "compositionality_type": "conjunction", 
        "answers": [
            {
                "answer": "Birmingham Wildlife Conservation Park", 
                "answer_id": "m.07_4t5", 
                "aliases": [
                    "Birmingham Wildlife Conservation"
                ]
            }
        ], 
        "created": "2018-02-13T01:31:10"
    }, 
    {
        "ID": "WebQTest-1419_409fa6037cd85766578a9e48b3b4129f", 
        "webqsp_ID": "WebQTest-1419", 
        "webqsp_question": "what inspired michelangelo buonarroti", 
        "machine_question": "what inspired the architect that desinged Laurentian Library", 
        "question": "Who inspired the architect who designed Laurentian Library?", 
        "sparql": "PREFIX ns: <http://rdf.freebase.com/ns/>\nSELECT DISTINCT ?x\nWHERE {\nFILTER (?x != ?c)\nFILTER (!isLiteral(?x) OR lang(?x) = '' OR langMatches(lang(?x), 'en'))\n?c ns:architecture.architect.structures_designed ns:m.06hthb . \n?c ns:influence.influence_node.influenced_by ?x .\n}\n", 
        "compositionality_type": "composition", 
        "answers": [
            {
                "answer": "Giovanni Pico della Mirandola", 
                "answer_id": "m.013w_3", 
                "aliases": [
                    "Pico Mirandola", 
                    "Giovanni Pico Della Mirandola"
                ]
            }, 
            {
                "answer": "Domenico Ghirlandaio", 
                "answer_id": "m.01cc3w", 
                "aliases": [
                    "Domenico di Tommaso di Currado di Doffo Bigordi", 
                    "Il Ghirlandaio"
                ]
            }, 
            {
                "answer": "Lorenzo de' Medici", 
                "answer_id": "m.04qj5", 
                "aliases": [
                    "Lorenzo il Magnifico", 
                    "Giovanni de' Medici"
                ]
            }, 
            {
                "answer": "Melozzo da Forl\u00ec", 
                "answer_id": "m.072cpw", 
                "aliases": [
                    "Melozzo da Forli"
                ]
            }, 
            {
                "answer": "Girolamo Savonarola", 
                "answer_id": "m.0d8wb", 
                "aliases": []
            }, 
            {
                "answer": "Donatello", 
                "answer_id": "m.0j56d", 
                "aliases": [
                    "Donato di Niccolo Bardi"
                ]
            }
        ], 
        "created": "2018-02-13T05:19:39"
    }, 
    {
        "ID": "WebQTrn-1408_a3164ab4c5979c5c96d67360225d68b1", 
        "webqsp_ID": "WebQTrn-1408", 
        "webqsp_question": "who was louis kossuth", 
        "machine_question": "who was the person education institution is Calvinist college of S\u00c3\u00a1rospatak", 
        "question": "What did the famous person who went to Calvinist College of Sarospatak do?", 
        "sparql": "PREFIX ns: <http://rdf.freebase.com/ns/>\nSELECT DISTINCT ?x\nWHERE {\nFILTER (?x != ?c)\nFILTER (!isLiteral(?x) OR lang(?x) = '' OR langMatches(lang(?x), 'en'))\n?c ns:people.person.education ?k .\n?k ns:education.education.institution ns:m.0k1bfwz . \n?c ns:people.person.profession ?x .\n}\n", 
        "compositionality_type": "composition", 
        "answers": [
            {
                "answer": "Lawyer", 
                "answer_id": "m.04gc2", 
                "aliases": [
                    "international lawyer", 
                    "Barrister", 
                    "Attorney", 
                    "Counsel", 
                    "Solicitor"
                ]
            }, 
            {
                "answer": "Politician", 
                "answer_id": "m.0fj9f", 
                "aliases": [
                    "Pol\u00edtico"
                ]
            }
        ], 
        "created": "2018-02-12T22:14:29"
    }, 
    {
        "ID": "WebQTest-1081_6118bd42202be020c123831a76c283c6", 
        "webqsp_ID": "WebQTest-1081", 
        "webqsp_question": "where did george washington carver go to collage", 
        "machine_question": "where did the person education institution is Minneapolis High School go to collage", 
        "question": "What college did the President who attended Minneapolis High School go to?", 
        "sparql": "PREFIX ns: <http://rdf.freebase.com/ns/>\nSELECT DISTINCT ?x\nWHERE {\nFILTER (?x != ?c)\nFILTER (!isLiteral(?x) OR lang(?x) = '' OR langMatches(lang(?x), 'en'))\n?c ns:people.person.education ?k .\n?k ns:education.education.institution ns:m.076fk5z . \n?c ns:people.person.education ?y .\n?y ns:education.education.institution ?x .\n?x ns:common.topic.notable_types ns:m.01y2hnl .\n}\n", 
        "compositionality_type": "composition", 
        "answers": [
            {
                "answer": "Simpson College", 
                "answer_id": "m.01xssh", 
                "aliases": [
                    "Simpson College, main campus", 
                    "Simpson College, Indianola", 
                    "Simpson"
                ]
            }, 
            {
                "answer": "Iowa State University", 
                "answer_id": "m.03v6t", 
                "aliases": [
                    "Iowa State University, Ames", 
                    "Iowa State University, main campus", 
                    "Iowa State", 
                    "ISU"
                ]
            }
        ], 
        "created": "2018-02-13T04:38:25"
    }, 
    {
        "ID": "WebQTrn-2079_abc143e50fcf4915c8267215915795b5", 
        "webqsp_ID": "WebQTrn-2079", 
        "webqsp_question": "what years the steelers won the super bowl", 
        "machine_question": "what years the the team has a team moscot named Steely McBeam won the super bowl", 
        "question": "Which years was the Superbowl won by the team whose mascot is Steely McBeam?", 
        "sparql": "PREFIX ns: <http://rdf.freebase.com/ns/>\nSELECT DISTINCT ?x\nWHERE {\nFILTER (?x != ?c)\nFILTER (!isLiteral(?x) OR lang(?x) = '' OR langMatches(lang(?x), 'en'))\n?c ns:sports.sports_team.team_mascot ns:m.02x0cyj . \n?c ns:sports.sports_team.championships ?x .\n}\n", 
        "compositionality_type": "composition", 
        "answers": [
            {
                "answer": "2011 AFC Championship Game", 
                "answer_id": "m.0_gt_jy", 
                "aliases": []
            }, 
            {
                "answer": "2009 AFC Championship Game", 
                "answer_id": "m.0_gt_lv", 
                "aliases": []
            }, 
            {
                "answer": "2006 AFC Championship Game", 
                "answer_id": "m.0_gt_my", 
                "aliases": []
            }, 
            {
                "answer": "Super Bowl XL", 
                "answer_id": "m.032tn6", 
                "aliases": []
            }, 
            {
                "answer": "Super Bowl XLIII", 
                "answer_id": "m.04n7r5", 
                "aliases": [
                    "Super Bowl 43", 
                    "Super Bowl 2009"
                ]
            }, 
            {
                "answer": "Super Bowl IX", 
                "answer_id": "m.076p2", 
                "aliases": []
            }, 
            {
                "answer": "Super Bowl X", 
                "answer_id": "m.076pf", 
                "aliases": []
            }, 
            {
                "answer": "Super Bowl XIII", 
                "answer_id": "m.076qg", 
                "aliases": []
            }, 
            {
                "answer": "Super Bowl XIV", 
                "answer_id": "m.076qt", 
                "aliases": []
            }, 
            {
                "answer": "1996 AFC Championship Game", 
                "answer_id": "m.0hzps_h", 
                "aliases": [
                    "1995 AFC Championship game"
                ]
            }
        ], 
        "created": "2018-02-12T23:22:38"
    }, 
    {
        "ID": "WebQTrn-962_032f61bfcfed69da8b215bb8f058c24e", 
        "webqsp_ID": "WebQTrn-962", 
        "webqsp_question": "who played forrest gump as a kid", 
        "machine_question": "who played the film has a charcter named Jenny's Father as a kid", 
        "question": "What actor played the a kid in the movie with a character named Jenny's Father?", 
        "sparql": "PREFIX ns: <http://rdf.freebase.com/ns/>\nSELECT DISTINCT ?x\nWHERE {\nFILTER (?x != ?c)\nFILTER (!isLiteral(?x) OR lang(?x) = '' OR langMatches(lang(?x), 'en'))\n?c ns:film.film.starring ?k .\n?k ns:film.performance.character ns:m.0y54dn_ . \n?c ns:film.film.starring ?y .\n?y ns:film.performance.actor ?x .\n?y ns:film.performance.character ns:m.0264f7h .\n?y ns:film.performance.character_note ?sk0 .\nFILTER (str(?sk0) = \"Young Forrest\")\n}\n", 
        "compositionality_type": "composition", 
        "answers": [
            {
                "answer": "Michael Connor Humphreys", 
                "answer_id": "m.02ptwkr", 
                "aliases": [
                    "Michael Conner Humphreys"
                ]
            }
        ], 
        "created": "2018-02-12T21:28:01"
    }, 
    {
        "ID": "WebQTest-1950_42588c6fd3d30a777953bbaf2b4079b9", 
        "webqsp_ID": "WebQTest-1950", 
        "webqsp_question": "where is president kennedy buried", 
        "machine_question": "where is the person education institution is Edward Devotion School buried", 
        "question": "What is the burial place of the famous person who went to Edward Devotion school?", 
        "sparql": "PREFIX ns: <http://rdf.freebase.com/ns/>\nSELECT DISTINCT ?x\nWHERE {\nFILTER (?x != ?c)\nFILTER (!isLiteral(?x) OR lang(?x) = '' OR langMatches(lang(?x), 'en'))\n?c ns:people.person.education ?k .\n?k ns:education.education.institution ns:m.0ccg42 . \n?c ns:people.deceased_person.place_of_burial ?x .\n}\n", 
        "compositionality_type": "composition", 
        "answers": [
            {
                "answer": "Arlington National Cemetery", 
                "answer_id": "m.0lbp_", 
                "aliases": [
                    "Arlington Cemetery"
                ]
            }
        ], 
        "created": "2018-02-13T06:22:17"
    }, 
    {
        "ID": "WebQTrn-2251_fb8571f22e28938b9912ddcf1124edb1", 
        "webqsp_ID": "WebQTrn-2251", 
        "webqsp_question": "who wore the darth vader suit in revenge of the sith", 
        "machine_question": "who wore the darth vader suit in the film has a charcter named Senator Bana Breemu", 
        "question": "Who played Darth Vadar in the film with a character named Bana Breemu?", 
        "sparql": "PREFIX ns: <http://rdf.freebase.com/ns/>\nSELECT DISTINCT ?x\nWHERE {\nFILTER (?x != ?c)\nFILTER (!isLiteral(?x) OR lang(?x) = '' OR langMatches(lang(?x), 'en'))\n?c ns:film.film.starring ?k .\n?k ns:film.performance.character ns:m.0gzk5tq . \n?c ns:film.film.starring ?y .\n?y ns:film.performance.actor ?x .\n?y ns:film.performance.character ns:m.0f2y0 .\n}\n", 
        "compositionality_type": "composition", 
        "answers": [
            {
                "answer": "Hayden Christensen", 
                "answer_id": "m.0f276", 
                "aliases": [
                    "H", 
                    "Hayden Christiansen", 
                    "Den"
                ]
            }
        ], 
        "created": "2018-02-12T23:39:08"
    }, 
    {
        "ID": "WebQTest-430_8562012e739a0e7aee294a26ad53e581", 
        "webqsp_ID": "WebQTest-430", 
        "webqsp_question": "what instruments does justin bieber use", 
        "machine_question": "what instruments does the artist had a concert tour named Believe Tour use", 
        "question": "The artist who had a concert tour named Believe Tour uses what type of instrument?", 
        "sparql": "PREFIX ns: <http://rdf.freebase.com/ns/>\nSELECT DISTINCT ?x\nWHERE {\nFILTER (?x != ?c)\nFILTER (!isLiteral(?x) OR lang(?x) = '' OR langMatches(lang(?x), 'en'))\n?c ns:music.artist.concert_tours ns:m.0j_3p6t . \n?c ns:music.group_member.membership ?y .\n?y ns:music.group_membership.role ?x .\n}\n", 
        "compositionality_type": "composition", 
        "answers": [
            {
                "answer": "Vocals", 
                "answer_id": "m.0290ngj", 
                "aliases": [
                    "main vocals", 
                    "Clean vocals", 
                    "vocals", 
                    "vocal", 
                    "Vocal"
                ]
            }
        ], 
        "created": "2018-02-13T03:29:06"
    }, 
    {
        "ID": "WebQTrn-849_586aae7703d62aa44eb79759e1563309", 
        "webqsp_ID": "WebQTrn-849", 
        "webqsp_question": "which countries do germany border", 
        "machine_question": "which countries do germany border and is the country that contains Lejre Municipality", 
        "question": "What European Union country sharing borders with Germany contains the Lejre Municipality?", 
        "sparql": "PREFIX ns: <http://rdf.freebase.com/ns/>\nSELECT DISTINCT ?x\nWHERE {\nFILTER (?x != ns:m.0345h)\nFILTER (!isLiteral(?x) OR lang(?x) = '' OR langMatches(lang(?x), 'en'))\nns:m.0345h ns:location.location.adjoin_s ?y .\n?y ns:location.adjoining_relationship.adjoins ?x .\n?x ns:common.topic.notable_types ns:m.01mp .\n?x ns:location.country.administrative_divisions ns:m.010v_j8w . \n}", 
        "compositionality_type": "conjunction", 
        "answers": [
            {
                "answer": "Denmark", 
                "answer_id": "m.0k6nt", 
                "aliases": [
                    "D\u00e4nemark", 
                    "Kingdom of Denmark", 
                    "Kongeriget Danmark", 
                    "\u4e39\u9ea6"
                ]
            }
        ], 
        "created": "2018-02-12T21:13:45"
    }, 
    {
        "ID": "WebQTrn-710_c264a6d11d7956741926d417b94327e2", 
        "webqsp_ID": "WebQTrn-710", 
        "webqsp_question": "when was the last time the san francisco giants won a world series", 
        "machine_question": "when was the last time the the organiztion leadership has a person named Larry Baer won a world series", 
        "question": "When was the last time a team led by Larr Baer win the World Series?", 
        "sparql": "PREFIX ns: <http://rdf.freebase.com/ns/>\nSELECT DISTINCT ?x\nWHERE {\nFILTER (?x != ?c)\nFILTER (!isLiteral(?x) OR lang(?x) = '' OR langMatches(lang(?x), 'en'))\n?c ns:organization.organization.leadership ?k .\n?k ns:organization.leadership.person ns:m.0hhv_6h . \n?c ns:sports.sports_team.championships ?x .\n?x ns:time.event.start_date ?sk0 .\n}\nORDER BY DESC(xsd:datetime(?sk0))\nLIMIT 1\n", 
        "compositionality_type": "composition", 
        "answers": [
            {
                "answer": "2014 World Series", 
                "answer_id": "m.0117q3yz", 
                "aliases": [
                    "2014 World"
                ]
            }
        ], 
        "created": "2018-02-12T20:57:09"
    }, 
    {
        "ID": "WebQTrn-88_54f1262a1dbcb7b82f5b8ebd614401b9", 
        "webqsp_ID": "WebQTrn-88", 
        "webqsp_question": "where is santa clara university", 
        "machine_question": "where is the educational institution newspaper is The Santa Clara", 
        "question": "It what city and state is the university that publishes the newspaper titled Santa Clara?", 
        "sparql": "PREFIX ns: <http://rdf.freebase.com/ns/>\nSELECT DISTINCT ?x\nWHERE {\nFILTER (?x != ?c)\nFILTER (!isLiteral(?x) OR lang(?x) = '' OR langMatches(lang(?x), 'en'))\n?c ns:education.educational_institution.newspaper ns:m.0f4t11 . \n?c ns:location.location.containedby ?x .\n}\n", 
        "compositionality_type": "composition", 
        "answers": [
            {
                "answer": "California", 
                "answer_id": "m.01n7q", 
                "aliases": [
                    "California, USA", 
                    "Calif", 
                    "CA", 
                    "Golden State"
                ]
            }, 
            {
                "answer": "United States of America", 
                "answer_id": "m.09c7w0", 
                "aliases": [
                    "U.S. of A.", 
                    "Estats Units d'Am\u00e8rica", 
                    "USA", 
                    "U.S.A.", 
                    "U.S.", 
                    "The States", 
                    "US", 
                    "United States", 
                    "America"
                ]
            }, 
            {
                "answer": "Santa Clara", 
                "answer_id": "m.0r6cx", 
                "aliases": [
                    "Santa Clara CA", 
                    "Santa Clara, California", 
                    "Santa Clara County / Santa Clara city"
                ]
            }
        ], 
        "created": "2018-02-12T19:46:04"
    }, 
    {
        "ID": "WebQTrn-2209_c1374f388d9cc7a78365860c91218362", 
        "webqsp_ID": "WebQTrn-2209", 
        "webqsp_question": "when did the celtics win championship", 
        "machine_question": "when did the the basket ball team head coach is Brad Stevens win championship", 
        "question": "What year did the basketball team coached by Brad Stevens win the championship?", 
        "sparql": "PREFIX ns: <http://rdf.freebase.com/ns/>\nSELECT DISTINCT ?x\nWHERE {\nFILTER (?x != ?c)\nFILTER (!isLiteral(?x) OR lang(?x) = '' OR langMatches(lang(?x), 'en'))\n?c ns:basketball.basketball_team.head_coach ns:m.02qwvmq . \n?c ns:sports.sports_team.championships ?x .\n}\n", 
        "compositionality_type": "composition", 
        "answers": [
            {
                "answer": "2008 NBA Finals", 
                "answer_id": "m.0403mzq", 
                "aliases": []
            }, 
            {
                "answer": "1969 NBA Finals", 
                "answer_id": "m.08dxfs", 
                "aliases": []
            }, 
            {
                "answer": "1986 NBA Finals", 
                "answer_id": "m.08x9wd", 
                "aliases": []
            }, 
            {
                "answer": "1984 NBA Finals", 
                "answer_id": "m.08x9xt", 
                "aliases": []
            }, 
            {
                "answer": "1981 NBA Finals", 
                "answer_id": "m.08x9zw", 
                "aliases": []
            }, 
            {
                "answer": "1976 NBA Finals", 
                "answer_id": "m.09l8zn", 
                "aliases": [
                    "1976 NBA World Championship Series"
                ]
            }, 
            {
                "answer": "1974 NBA Finals", 
                "answer_id": "m.0cs1gb", 
                "aliases": [
                    "1974 NBA World Championship Series"
                ]
            }, 
            {
                "answer": "1968 NBA Finals", 
                "answer_id": "m.0cs222", 
                "aliases": []
            }, 
            {
                "answer": "1966 NBA Finals", 
                "answer_id": "m.0cs24h", 
                "aliases": []
            }, 
            {
                "answer": "1965 NBA Finals", 
                "answer_id": "m.0cs266", 
                "aliases": [
                    "1965 NBA World Championship Series"
                ]
            }, 
            {
                "answer": "1964 NBA Finals", 
                "answer_id": "m.0cs27l", 
                "aliases": []
            }, 
            {
                "answer": "1963 NBA Finals", 
                "answer_id": "m.0cs29b", 
                "aliases": []
            }, 
            {
                "answer": "1962 NBA Finals", 
                "answer_id": "m.0cs2f4", 
                "aliases": []
            }, 
            {
                "answer": "1961 NBA Finals", 
                "answer_id": "m.0cs2fv", 
                "aliases": []
            }, 
            {
                "answer": "1960 NBA Finals", 
                "answer_id": "m.0cs2h6", 
                "aliases": []
            }, 
            {
                "answer": "1959 NBA Finals", 
                "answer_id": "m.0cs2hx", 
                "aliases": []
            }, 
            {
                "answer": "1957 NBA Finals", 
                "answer_id": "m.0cs2n0", 
                "aliases": [
                    "1957 NBA World Championship Series"
                ]
            }
        ], 
        "created": "2018-02-12T23:35:04"
    }, 
    {
        "ID": "WebQTrn-1384_c8675ba6ed4c0c17d90459e7a60871b0", 
        "webqsp_ID": "WebQTrn-1384", 
        "webqsp_question": "who was louis xvi", 
        "machine_question": "who was louis xvi and is the office position was held from 1952-02-06", 
        "question": "Who was Louis XVI that held the position form 6-2-1952?", 
        "sparql": "PREFIX ns: <http://rdf.freebase.com/ns/>\nSELECT DISTINCT ?x\nWHERE {\nFILTER (?x != ns:m.0dj9w)\nFILTER (!isLiteral(?x) OR lang(?x) = '' OR langMatches(lang(?x), 'en'))\nns:m.0dj9w ns:royalty.noble_person.titles ?y .\n?y ns:royalty.noble_title_tenure.noble_title ?x .\n?x ns:government.government_office_or_title.office_holders ?c .\n?c ns:government.government_position_held.from \"1952-02-06\"^^xsd:dateTime . \n}", 
        "compositionality_type": "conjunction", 
        "answers": [
            {
                "answer": "Duke of Normandy", 
                "answer_id": "m.0290vf", 
                "aliases": [
                    "Duchess of Normandy"
                ]
            }, 
            {
                "answer": "Duke of Normandy", 
                "answer_id": "m.0290vf", 
                "aliases": [
                    "Duchess of Normandy"
                ]
            }
        ], 
        "created": "2018-02-12T22:12:35"
    }, 
    {
        "ID": "WebQTest-103_dbd7a72f9e20ca9ddc11bd8708a79108", 
        "webqsp_ID": "WebQTest-103", 
        "webqsp_question": "what basketball teams has shaq played for", 
        "machine_question": "what basketball teams has shaq played for and the sports team owner is Micky Arison", 
        "question": "What basketball team owned by Micky Arison did Shaq play on?", 
        "sparql": "PREFIX ns: <http://rdf.freebase.com/ns/>\nSELECT DISTINCT ?x\nWHERE {\nFILTER (?x != ns:m.012xdf)\nFILTER (!isLiteral(?x) OR lang(?x) = '' OR langMatches(lang(?x), 'en'))\nns:m.012xdf ns:sports.pro_athlete.teams ?y .\n?y ns:sports.sports_team_roster.team ?x .\n?x ns:sports.sports_team.sport ns:m.018w8 .\n?x ns:sports.professional_sports_team.owner_s ns:m.027f6w . \n}", 
        "compositionality_type": "conjunction", 
        "answers": [
            {
                "answer": "Miami Heat", 
                "answer_id": "m.0jm2v", 
                "aliases": [
                    "Heat", 
                    "The Heatles"
                ]
            }
        ], 
        "created": "2018-02-13T02:46:19"
    }, 
    {
        "ID": "WebQTest-1251_cbf2f20f6caf754bc49d672ca7b150b7", 
        "webqsp_ID": "WebQTest-1251", 
        "webqsp_question": "which countries speak germanic languages", 
        "machine_question": "which countries speak germanic languages and the currency used in the country is East German mark", 
        "question": "What country speaks Germanic languages and uses the East German mark as currency?", 
        "sparql": "PREFIX ns: <http://rdf.freebase.com/ns/>\nSELECT DISTINCT ?x\nWHERE {\nFILTER (?x != ns:m.04306rv)\nFILTER (!isLiteral(?x) OR lang(?x) = '' OR langMatches(lang(?x), 'en'))\nns:m.04306rv ns:language.human_language.countries_spoken_in ?x .\n?x ns:location.country.official_language ns:m.04306rv .\n?x ns:location.country.currency_used ns:m.01tct6 . \n}", 
        "compositionality_type": "conjunction", 
        "answers": [
            {
                "answer": "East Germany", 
                "answer_id": "m.03f2w", 
                "aliases": [
                    "DDR", 
                    "German Democratic Republic", 
                    "East Germany"
                ]
            }
        ], 
        "created": "2018-02-13T04:57:06"
    }, 
    {
        "ID": "WebQTrn-3287_ebfe3c418f7914f9babf21caade27b05", 
        "webqsp_ID": "WebQTrn-3287", 
        "webqsp_question": "what is the currency of sweden called", 
        "machine_question": "what is the currency of the country that contains Kronoberg County called", 
        "question": "Kronoberg County is part of the country using what currency?", 
        "sparql": "PREFIX ns: <http://rdf.freebase.com/ns/>\nSELECT DISTINCT ?x\nWHERE {\nFILTER (?x != ?c)\nFILTER (!isLiteral(?x) OR lang(?x) = '' OR langMatches(lang(?x), 'en'))\n?c ns:location.country.administrative_divisions ns:m.0ztkm . \n?c ns:location.country.currency_used ?x .\n}\n", 
        "compositionality_type": "composition", 
        "answers": [
            {
                "answer": "Swedish krona", 
                "answer_id": "m.0485n", 
                "aliases": []
            }
        ], 
        "created": "2018-02-13T01:34:14"
    }, 
    {
        "ID": "WebQTest-1394_f8262ff7ab398db85555bd3c5a85af86", 
        "webqsp_ID": "WebQTest-1394", 
        "webqsp_question": "who coaches the carolina panthers", 
        "machine_question": "who coaches the the team has a team moscot named Sir Purr", 
        "question": "Team mascot named Sir Purr is part of the team coached by whom?", 
        "sparql": "PREFIX ns: <http://rdf.freebase.com/ns/>\nSELECT DISTINCT ?x\nWHERE {\nFILTER (?x != ?c)\nFILTER (!isLiteral(?x) OR lang(?x) = '' OR langMatches(lang(?x), 'en'))\n?c ns:sports.sports_team.team_mascot ns:m.03lr5s . \n?c ns:american_football.football_team.current_head_coach ?x .\n}\n", 
        "compositionality_type": "composition", 
        "answers": [
            {
                "answer": "Ron Rivera", 
                "answer_id": "m.04g57l", 
                "aliases": []
            }
        ], 
        "created": "2018-02-13T05:16:27"
    }, 
    {
        "ID": "WebQTrn-740_4a52faeb448c24fb7b803f52bce802c4", 
        "webqsp_ID": "WebQTrn-740", 
        "webqsp_question": "where did martin luther king junior go to college", 
        "machine_question": "where did martin luther king junior go to college and the educational institution newspaper is The Daily Free Press", 
        "question": "What college did Martin Luther King attend that publishes the Daily Free Press?", 
        "sparql": "PREFIX ns: <http://rdf.freebase.com/ns/>\nSELECT DISTINCT ?x\nWHERE {\nFILTER (?x != ns:m.051cc)\nFILTER (!isLiteral(?x) OR lang(?x) = '' OR langMatches(lang(?x), 'en'))\nns:m.051cc ns:people.person.education ?y .\n?y ns:education.education.institution ?x .\n?x ns:common.topic.notable_types ns:m.01y2hnl .\n?x ns:education.educational_institution.newspaper ns:m.09412d . \n}", 
        "compositionality_type": "conjunction", 
        "answers": [
            {
                "answer": "Boston University", 
                "answer_id": "m.0gl5_", 
                "aliases": [
                    "BU", 
                    "Boston"
                ]
            }
        ], 
        "created": "2018-02-12T20:59:57"
    }, 
    {
        "ID": "WebQTrn-773_418a0eae3845749d80f393c8a7689a7a", 
        "webqsp_ID": "WebQTrn-773", 
        "webqsp_question": "who won the governor election in puerto rico", 
        "machine_question": "who won the governor election in puerto rico and held his govermental position from after 2009-01-02", 
        "question": "What winner of the Puerto Rican governor election held position from after January 2, 2009?", 
        "sparql": "PREFIX ns: <http://rdf.freebase.com/ns/>\nSELECT DISTINCT ?x\nWHERE {\nFILTER (?x != ns:m.05r7t)\nFILTER (!isLiteral(?x) OR lang(?x) = '' OR langMatches(lang(?x), 'en'))\nns:m.05r7t ns:government.governmental_jurisdiction.governing_officials ?y .\n?y ns:government.government_position_held.office_holder ?x .\n?y ns:government.government_position_held.basic_title ns:m.0fkvn .\n?x ns:government.politician.government_positions_held ?c .\n?c ns:government.government_position_held.from ?num .\nFILTER (?num > \"2009-01-02\"^^xsd:dateTime) . \n}", 
        "compositionality_type": "comparative", 
        "answers": [
            {
                "answer": "Alejandro Garc\u00eda Padilla", 
                "answer_id": "m.0gkyvz7", 
                "aliases": [
                    "Alejandro Javier Garc\u00eda Padilla"
                ]
            }
        ], 
        "created": "2018-02-12T21:01:19"
    }, 
    {
        "ID": "WebQTest-714_1511c90eae455e2c84907099c9bb40e1", 
        "webqsp_ID": "WebQTest-714", 
        "webqsp_question": "what is the political system of south africa", 
        "machine_question": "what is the political system of the country that has the national anthem National anthem of South Africa", 
        "question": "Which political system does the country utilize, that has the  National anthem of South Africa?", 
        "sparql": "PREFIX ns: <http://rdf.freebase.com/ns/>\nSELECT DISTINCT ?x\nWHERE {\nFILTER (?x != ?c)\nFILTER (!isLiteral(?x) OR lang(?x) = '' OR langMatches(lang(?x), 'en'))\n?c ns:location.country.national_anthem ?k .\n?k ns:government.national_anthem_of_a_country.anthem ns:m.07lzg . \n?c ns:location.country.form_of_government ?x .\n}\n", 
        "compositionality_type": "composition", 
        "answers": [
            {
                "answer": "Constitutional republic", 
                "answer_id": "m.0c9rw5", 
                "aliases": [
                    "Constitutional"
                ]
            }, 
            {
                "answer": "Parliamentary republic", 
                "answer_id": "m.0glnsx", 
                "aliases": [
                    "Parliamentary"
                ]
            }
        ], 
        "created": "2018-02-13T04:02:21"
    }, 
    {
        "ID": "WebQTrn-2539_d2479a35ad8cbd030080640bb28065f2", 
        "webqsp_ID": "WebQTrn-2539", 
        "webqsp_question": "what team did albert pujols play for", 
        "machine_question": "what team did albert pujols play for and is the team won the 1964 World Series championship", 
        "question": "What team did Pujols play for that won the 1964 World Series Championship?", 
        "sparql": "PREFIX ns: <http://rdf.freebase.com/ns/>\nSELECT DISTINCT ?x\nWHERE {\nFILTER (?x != ns:m.035gcb)\nFILTER (!isLiteral(?x) OR lang(?x) = '' OR langMatches(lang(?x), 'en'))\nns:m.035gcb ns:sports.pro_athlete.teams ?y .\n?y ns:sports.sports_team_roster.team ?x .\n?x ns:sports.sports_team.championships ns:m.045_79 . \n}", 
        "compositionality_type": "conjunction", 
        "answers": [
            {
                "answer": "St. Louis Cardinals", 
                "answer_id": "m.06x68", 
                "aliases": [
                    "Cards", 
                    "Rally Squirrel", 
                    "Saint Louis Cardinals", 
                    "Redbirds"
                ]
            }
        ], 
        "created": "2018-02-13T00:06:32"
    }, 
    {
        "ID": "WebQTrn-3763_71e18756807ccb1f6db04dd2ce81a6a1", 
        "webqsp_ID": "WebQTrn-3763", 
        "webqsp_question": "what country is russia close to", 
        "machine_question": "what country is russia close to and is the country that contains Abkhazia", 
        "question": "Abkhazia is part of what country close to Russia?", 
        "sparql": "PREFIX ns: <http://rdf.freebase.com/ns/>\nSELECT DISTINCT ?x\nWHERE {\nFILTER (?x != ns:m.06bnz)\nFILTER (!isLiteral(?x) OR lang(?x) = '' OR langMatches(lang(?x), 'en'))\nns:m.06bnz ns:location.location.adjoin_s ?y .\n?y ns:location.adjoining_relationship.adjoins ?x .\n?x ns:common.topic.notable_types ns:m.01mp .\n?x ns:location.country.administrative_divisions ns:m.011jw . \n}", 
        "compositionality_type": "conjunction", 
        "answers": [
            {
                "answer": "Georgia", 
                "answer_id": "m.0d0kn", 
                "aliases": [
                    "Republic of Georgia"
                ]
            }
        ], 
        "created": "2018-02-13T02:34:32"
    }, 
    {
        "ID": "WebQTrn-3100_143c89d70679c3e5257c93d8e2bc4c67", 
        "webqsp_ID": "WebQTrn-3100", 
        "webqsp_question": "what is the dominican republic part of", 
        "machine_question": "what is the dominican republic part of and the location time zone is UTC\u00e2\u0088\u009205:00", 
        "question": "Which globe region with the UTC\u00e2\u0088\u009205:00 time zone does the Dominican Republic call home?", 
        "sparql": "PREFIX ns: <http://rdf.freebase.com/ns/>\nSELECT DISTINCT ?x\nWHERE {\nFILTER (?x != ns:m.027rn)\nFILTER (!isLiteral(?x) OR lang(?x) = '' OR langMatches(lang(?x), 'en'))\nns:m.027rn ns:location.location.containedby ?x .\n?x ns:location.location.time_zones ns:m.02_37z . \n}", 
        "compositionality_type": "conjunction", 
        "answers": [
            {
                "answer": "Greater Antilles", 
                "answer_id": "m.01rll_", 
                "aliases": []
            }
        ], 
        "created": "2018-02-13T01:15:20"
    }, 
    {
        "ID": "WebQTrn-662_7a992044f94b39edfc37ac5dcfcb3c26", 
        "webqsp_ID": "WebQTrn-662", 
        "webqsp_question": "what was manchester united first name", 
        "machine_question": "what was the team won the 2008 FIFA Club World Cup Final championship first name", 
        "question": "What was the name of the team that won the 2008 FIFA Club World Cup Final championship?", 
        "sparql": "PREFIX ns: <http://rdf.freebase.com/ns/>\nSELECT DISTINCT ?x\nWHERE {\nFILTER (?x != ?c)\nFILTER (!isLiteral(?x) OR lang(?x) = '' OR langMatches(lang(?x), 'en'))\n?c ns:sports.sports_team.championships ns:m.053nq3y . \n?c ns:sports.sports_team.previously_known_as ?x .\n}\n", 
        "compositionality_type": "composition", 
        "answers": [
            {
                "answer": "Newton Heath L&YR F.C.", 
                "answer_id": "m.05l1ffz", 
                "aliases": []
            }
        ], 
        "created": "2018-02-12T20:53:12"
    }, 
    {
        "ID": "WebQTrn-2873_143c89d70679c3e5257c93d8e2bc4c67", 
        "webqsp_ID": "WebQTrn-2873", 
        "webqsp_question": "where does hector camacho live", 
        "machine_question": "where does hector camacho live and the location time zone is UTC\u00e2\u0088\u009205:00", 
        "question": "Where does Hector Camacho live, where the location time zone is UTC\u00e2\u0088\u009205:00?", 
        "sparql": "PREFIX ns: <http://rdf.freebase.com/ns/>\nSELECT DISTINCT ?x\nWHERE {\nFILTER (?x != ns:m.0lxcw)\nFILTER (!isLiteral(?x) OR lang(?x) = '' OR langMatches(lang(?x), 'en'))\nns:m.0lxcw ns:people.person.places_lived ?y .\n?y ns:people.place_lived.location ?x .\nFILTER(NOT EXISTS {?y ns:people.place_lived.end_date ?sk0} || \nEXISTS {?y ns:people.place_lived.end_date ?sk1 . \nFILTER(xsd:datetime(?sk1) >= \"2015-08-10\"^^xsd:dateTime) })\nFILTER(NOT EXISTS {?y ns:people.place_lived.start_date ?sk2} || \nEXISTS {?y ns:people.place_lived.start_date ?sk3 . \nFILTER(xsd:datetime(?sk3) <= \"2015-08-10\"^^xsd:dateTime) })\n?x ns:location.location.time_zones ns:m.02_37z . \n}", 
        "compositionality_type": "conjunction", 
        "answers": [
            {
                "answer": "Manhattan", 
                "answer_id": "m.0cc56", 
                "aliases": [
                    "New York County"
                ]
            }
        ], 
        "created": "2018-02-13T00:49:15"
    }, 
    {
        "ID": "WebQTrn-3763_64fc62dc06d16e612aafb00889d4ada1", 
        "webqsp_ID": "WebQTrn-3763", 
        "webqsp_question": "what country is russia close to", 
        "machine_question": "what country is russia close to and is the location that appointed Mikheil Saakashvili to govermental position", 
        "question": "What is the country close to Russia where Mikheil Saakashvii holds a government position?", 
        "sparql": "PREFIX ns: <http://rdf.freebase.com/ns/>\nSELECT DISTINCT ?x\nWHERE {\nFILTER (?x != ns:m.06bnz)\nFILTER (!isLiteral(?x) OR lang(?x) = '' OR langMatches(lang(?x), 'en'))\nns:m.06bnz ns:location.location.adjoin_s ?y .\n?y ns:location.adjoining_relationship.adjoins ?x .\n?x ns:common.topic.notable_types ns:m.01mp .\n?x ns:government.governmental_jurisdiction.governing_officials ?c .\n?c ns:government.government_position_held.appointed_by ns:m.0212q2 . \n}", 
        "compositionality_type": "conjunction", 
        "answers": [
            {
                "answer": "Georgia", 
                "answer_id": "m.0d0kn", 
                "aliases": [
                    "Republic of Georgia"
                ]
            }
        ], 
        "created": "2018-02-13T02:34:32"
    }, 
    {
        "ID": "WebQTrn-3763_eaa7a9f669e0d6d5caf732fd225ff411", 
        "webqsp_ID": "WebQTrn-3763", 
        "webqsp_question": "what country is russia close to", 
        "machine_question": "what country is the location that appointed Vladimir Putin to govermental position close to", 
        "question": "The location that appointed Vladimir Putin to govermental position is close to what countries?", 
        "sparql": "PREFIX ns: <http://rdf.freebase.com/ns/>\nSELECT DISTINCT ?x\nWHERE {\nFILTER (?x != ?c)\nFILTER (!isLiteral(?x) OR lang(?x) = '' OR langMatches(lang(?x), 'en'))\n?c ns:government.governmental_jurisdiction.governing_officials ?k .\n?k ns:government.government_position_held.appointed_by ns:m.08193 . \n?c ns:location.location.adjoin_s ?y .\n?y ns:location.adjoining_relationship.adjoins ?x .\n?x ns:common.topic.notable_types ns:m.01mp .\n}\n", 
        "compositionality_type": "composition", 
        "answers": [
            {
                "answer": "Belarus", 
                "answer_id": "m.0163v", 
                "aliases": [
                    "Republic of Belarus", 
                    "Respublika Belarus\u2019", 
                    "Bellarussiya", 
                    "Bielaru\u015b"
                ]
            }, 
            {
                "answer": "Estonia", 
                "answer_id": "m.02kmm", 
                "aliases": [
                    "Estland", 
                    "Republic of Estonia"
                ]
            }, 
            {
                "answer": "Finland", 
                "answer_id": "m.02vzc", 
                "aliases": [
                    "Suomi", 
                    "Republic of Finland"
                ]
            }, 
            {
                "answer": "Kazakhstan", 
                "answer_id": "m.047lj", 
                "aliases": []
            }, 
            {
                "answer": "Latvia", 
                "answer_id": "m.04g5k", 
                "aliases": [
                    "Lettland", 
                    "Republic of Latvia"
                ]
            }, 
            {
                "answer": "Lithuania", 
                "answer_id": "m.04gzd", 
                "aliases": [
                    "Republic of Lithuania", 
                    "Lietuva", 
                    "Lietuvos Respublika", 
                    "Litauen"
                ]
            }, 
            {
                "answer": "Mongolia", 
                "answer_id": "m.04w8f", 
                "aliases": []
            }, 
            {
                "answer": "Norway", 
                "answer_id": "m.05b4w", 
                "aliases": [
                    "Norge", 
                    "Kingdom of Norway"
                ]
            }, 
            {
                "answer": "North Korea", 
                "answer_id": "m.05b7q", 
                "aliases": [
                    "Democratic People's Republic of Korea", 
                    "DPRK"
                ]
            }, 
            {
                "answer": "Poland", 
                "answer_id": "m.05qhw", 
                "aliases": [
                    "Polska", 
                    "Republic of Poland"
                ]
            }, 
            {
                "answer": "Ukraine", 
                "answer_id": "m.07t21", 
                "aliases": [
                    "Ukraine Region"
                ]
            }, 
            {
                "answer": "China", 
                "answer_id": "m.0d05w3", 
                "aliases": [
                    "People's Republic of China"
                ]
            }, 
            {
                "answer": "Georgia", 
                "answer_id": "m.0d0kn", 
                "aliases": [
                    "Republic of Georgia"
                ]
            }, 
            {
                "answer": "Azerbaijan", 
                "answer_id": "m.0jhd", 
                "aliases": [
                    "Republic of Azerbaijan", 
                    "Az\u0259rbaycan Respublikas\u0131"
                ]
            }
        ], 
        "created": "2018-02-13T02:34:32"
    }, 
    {
        "ID": "WebQTest-743_0a8cdba29cf260283b7c890b3609c0b9", 
        "webqsp_ID": "WebQTest-743", 
        "webqsp_question": "what was the name of jfk 's brothers", 
        "machine_question": "what was the name of jfk 's brothers and held his govermental position from latest", 
        "question": "Which of JFK's brother held the latest governmental position?", 
        "sparql": "PREFIX ns: <http://rdf.freebase.com/ns/>\nSELECT DISTINCT ?x\nWHERE {\nFILTER (?x != ns:m.0d3k14)\nFILTER (!isLiteral(?x) OR lang(?x) = '' OR langMatches(lang(?x), 'en'))\nns:m.0d3k14 ns:people.person.sibling_s ?y .\n?y ns:people.sibling_relationship.sibling ?x .\n?x ns:people.person.gender ns:m.05zppz .\n?x ns:government.politician.government_positions_held ?c .\n?c ns:government.government_position_held.from ?num .\n}\nORDER BY DESC(?num) LIMIT 1", 
        "compositionality_type": "superlative", 
        "answers": [
            {
                "answer": "Robert F. Kennedy", 
                "answer_id": "m.06hx2", 
                "aliases": [
                    "Kennedy, Robert F.", 
                    "Bobby", 
                    "Robert Francis \"Bobby\" Kennedy", 
                    "Senator Robert Kennedy", 
                    "Bobby Kennedy", 
                    "Senator Robert Kennedy of New York", 
                    "RFK", 
                    "Robert Kennedy", 
                    "R.F.K.", 
                    "Robert Francis Kennedy"
                ]
            }
        ], 
        "created": "2018-02-13T04:04:56"
    }, 
    {
        "ID": "WebQTrn-411_a9b18d079f29555cbd1e1740c7d6e40e", 
        "webqsp_ID": "WebQTrn-411", 
        "webqsp_question": "who was the first russian president", 
        "machine_question": "who was the first the country that contains Krasnodar Krai president", 
        "question": "What was the first president of the country that has Karanodar Krai?", 
        "sparql": "PREFIX ns: <http://rdf.freebase.com/ns/>\nSELECT DISTINCT ?x\nWHERE {\nFILTER (?x != ?c)\nFILTER (!isLiteral(?x) OR lang(?x) = '' OR langMatches(lang(?x), 'en'))\n?c ns:location.country.administrative_divisions ns:m.02dw2c . \n?c ns:government.governmental_jurisdiction.governing_officials ?y .\n?y ns:government.government_position_held.office_holder ?x .\n?y ns:government.government_position_held.basic_title ns:m.060c4 .\n?y ns:government.government_position_held.from ?sk0 .\n}\nORDER BY xsd:datetime(?sk0)\nLIMIT 1\n", 
        "compositionality_type": "composition", 
        "answers": [
            {
                "answer": "Boris Yeltsin", 
                "answer_id": "m.01krs", 
                "aliases": [
                    "Boris Jeltsin", 
                    "Boris Nikolayevich Yeltsin"
                ]
            }
        ], 
        "created": "2018-02-12T20:25:29"
    }, 
    {
        "ID": "WebQTrn-955_048afa751894ba3400587301a9e1cc7a", 
        "webqsp_ID": "WebQTrn-955", 
        "webqsp_question": "what year michael jordan came in the nba", 
        "machine_question": "what year the person education institution is Emsley A. Laney High School came in the nba", 
        "question": "What year did the NBA player that went to Emsley A Laney High school got drafted?", 
        "sparql": "PREFIX ns: <http://rdf.freebase.com/ns/>\nSELECT DISTINCT ?x\nWHERE {\nFILTER (?x != ?c)\nFILTER (!isLiteral(?x) OR lang(?x) = '' OR langMatches(lang(?x), 'en'))\n?c ns:people.person.education ?k .\n?k ns:education.education.institution ns:m.07qymj . \n?c ns:sports.drafted_athlete.drafted ?y .\n?y ns:sports.sports_league_draft_pick.draft ?x .\n}\n", 
        "compositionality_type": "composition", 
        "answers": [
            {
                "answer": "1984 NBA draft", 
                "answer_id": "m.06jncs", 
                "aliases": []
            }
        ], 
        "created": "2018-02-12T21:26:48"
    }, 
    {
        "ID": "WebQTrn-3668_dfad75afd3c40503f595b4cb6acc43a5", 
        "webqsp_ID": "WebQTrn-3668", 
        "webqsp_question": "what language does people in france speak", 
        "machine_question": "what language does people in the location that appointed Nicolas Sarkozy to govermental position speak", 
        "question": "What are the languages used for communication in the region where Nicolas Sarkozy was placed in a government post?", 
        "sparql": "PREFIX ns: <http://rdf.freebase.com/ns/>\nSELECT DISTINCT ?x\nWHERE {\nFILTER (?x != ?c)\nFILTER (!isLiteral(?x) OR lang(?x) = '' OR langMatches(lang(?x), 'en'))\n?c ns:government.governmental_jurisdiction.governing_officials ?k .\n?k ns:government.government_position_held.appointed_by ns:m.02ps9k . \n?c ns:location.country.languages_spoken ?x .\n}\n", 
        "compositionality_type": "composition", 
        "answers": [
            {
                "answer": "Basque Language", 
                "answer_id": "m.017k6", 
                "aliases": [
                    "Euskera", 
                    "Vascuense", 
                    "Basque"
                ]
            }, 
            {
                "answer": "Catalan language", 
                "answer_id": "m.01m69", 
                "aliases": [
                    "Catalonian", 
                    "Catalan-Valencian-Balear Language", 
                    "Catalan-Valencian-Balear", 
                    "Bacav\u00e8s", 
                    "Catal\u00e1n", 
                    "Catal\u00e0", 
                    "Catalan"
                ]
            }, 
            {
                "answer": "Proven\u00e7al Language", 
                "answer_id": "m.01pr4b", 
                "aliases": [
                    "Provencal language", 
                    "Proven\u00e7al", 
                    "Provenzale", 
                    "Prouven\u00e7au", 
                    "Mistralien"
                ]
            }, 
            {
                "answer": "Corsican Language", 
                "answer_id": "m.0247v", 
                "aliases": [
                    "Corse", 
                    "Corso", 
                    "Corsi", 
                    "Corsican", 
                    "Corsu"
                ]
            }, 
            {
                "answer": "Tahitian Language", 
                "answer_id": "m.02ckss", 
                "aliases": [
                    "Tahitian"
                ]
            }, 
            {
                "answer": "Franco-Proven\u00e7al Language", 
                "answer_id": "m.02cw59", 
                "aliases": [
                    "Patois", 
                    "Romand", 
                    "Franco-Proven\u00e7al", 
                    "Arpitan", 
                    "Franco-Provencal language", 
                    "Francoproven\u00e7al"
                ]
            }, 
            {
                "answer": "Breton", 
                "answer_id": "m.02hrcsr", 
                "aliases": [
                    "Breton Language", 
                    "Brezhoneg"
                ]
            }, 
            {
                "answer": "Yeniche Language", 
                "answer_id": "m.02hwllm", 
                "aliases": [
                    "Yenishe", 
                    "Jenisch", 
                    "Yeniche language", 
                    "Yeniche", 
                    "German Travellers"
                ]
            }, 
            {
                "answer": "Guianese Creole French Language", 
                "answer_id": "m.02hx2bx", 
                "aliases": [
                    "Patois", 
                    "French Guianese Creole French", 
                    "Guyane Creole", 
                    "Guianese Creole French", 
                    "Patwa", 
                    "French Guiana Creole", 
                    "Guyane", 
                    "Guyanais"
                ]
            }, 
            {
                "answer": "Esperanto Language", 
                "answer_id": "m.02jcw", 
                "aliases": [
                    "La Internacia Lingvo", 
                    "La Lingvo Internacia", 
                    "Esperanto"
                ]
            }, 
            {
                "answer": "West Flemish", 
                "answer_id": "m.02y3v", 
                "aliases": [
                    "Vlams", 
                    "West-Vlaams", 
                    "West-Vlams"
                ]
            }, 
            {
                "answer": "Gallo language", 
                "answer_id": "m.033bw8", 
                "aliases": [
                    "Gallo"
                ]
            }, 
            {
                "answer": "Antillean Creole French", 
                "answer_id": "m.04k39q", 
                "aliases": []
            }, 
            {
                "answer": "Occitan language", 
                "answer_id": "m.05l0r", 
                "aliases": [
                    "Occitan (post 1500) Language", 
                    "Langue d'oc", 
                    "Occitan", 
                    "Lenga d'\u00f2c"
                ]
            }, 
            {
                "answer": "French", 
                "answer_id": "m.064_8sq", 
                "aliases": [
                    "Francais", 
                    "Fran\u00e7ais", 
                    "French", 
                    "French language"
                ]
            }, 
            {
                "answer": "R\u00e9union Creole French Language", 
                "answer_id": "m.09hw0w", 
                "aliases": [
                    "u'R\\xe9union Creole French'", 
                    "Reunion Creole", 
                    "R\u00e9union Creole French"
                ]
            }, 
            {
                "answer": "Alsatian dialect", 
                "answer_id": "m.0l2r0", 
                "aliases": []
            }
        ], 
        "created": "2018-02-13T02:20:39"
    }, 
    {
        "ID": "WebQTrn-114_f20d37026a54a0ce5789e0e93e43c619", 
        "webqsp_ID": "WebQTrn-114", 
        "webqsp_question": "what religion are people in russia", 
        "machine_question": "what religion are people in russia and the religion place of worship is B\u00c3\u00bcy\u00c3\u00bck Selimiye Mosque", 
        "question": "What Russian religion has a place of worship named B\u00c3\u00bcy\u00c3\u00bck Selimiye Mosque?", 
        "sparql": "PREFIX ns: <http://rdf.freebase.com/ns/>\nSELECT DISTINCT ?x\nWHERE {\nFILTER (?x != ns:m.06bnz)\nFILTER (!isLiteral(?x) OR lang(?x) = '' OR langMatches(lang(?x), 'en'))\nns:m.06bnz ns:location.statistical_region.religions ?y .\n?y ns:location.religion_percentage.religion ?x .\n?x ns:religion.religion.places_of_worship ns:m.010282jt . \n}", 
        "compositionality_type": "conjunction", 
        "answers": [
            {
                "answer": "Islam", 
                "answer_id": "m.0flw86", 
                "aliases": []
            }
        ], 
        "created": "2018-02-12T19:48:45"
    }, 
    {
        "ID": "WebQTest-899_38a4a0b1c0e707d531ffdc95fcbf5673", 
        "webqsp_ID": "WebQTest-899", 
        "webqsp_question": "where is olympic national park wa", 
        "machine_question": "where is the location partially contains Hoh River wa", 
        "question": "Which location is the Hoh River partially situated in?", 
        "sparql": "PREFIX ns: <http://rdf.freebase.com/ns/>\nSELECT DISTINCT ?x\nWHERE {\nFILTER (?x != ?c)\nFILTER (!isLiteral(?x) OR lang(?x) = '' OR langMatches(lang(?x), 'en'))\n?c ns:location.location.partiallycontains ?k .\n?k ns:location.partial_containment_relationship.partially_contains ns:m.039fqk . \n?c ns:base.usnationalparks.us_national_park.state ?x .\n}\n", 
        "compositionality_type": "composition", 
        "answers": [
            {
                "answer": "Washington", 
                "answer_id": "m.081yw", 
                "aliases": [
                    "Washington, Madras", 
                    "Wash", 
                    "WA"
                ]
            }
        ], 
        "created": "2018-02-13T04:22:12"
    }, 
    {
        "ID": "WebQTest-1508_872253e47dd6ddaa213ff31eeda8783b", 
        "webqsp_ID": "WebQTest-1508", 
        "webqsp_question": "when did bill clinton go to college", 
        "machine_question": "when did bill clinton go to college and the location time zone is Eastern Time Zone", 
        "question": "What college did Bill Clinton attend that is in Eastern Time Zone?", 
        "sparql": "PREFIX ns: <http://rdf.freebase.com/ns/>\nSELECT DISTINCT ?x\nWHERE {\nFILTER (?x != ns:m.0157m)\nFILTER (!isLiteral(?x) OR lang(?x) = '' OR langMatches(lang(?x), 'en'))\nns:m.0157m ns:people.person.education ?y .\n?y ns:education.education.institution ?x .\n?x ns:common.topic.notable_types ns:m.01y2hnl .\n?x ns:location.location.time_zones ns:m.02hcv8 . \n}", 
        "compositionality_type": "conjunction", 
        "answers": [
            {
                "answer": "Georgetown University", 
                "answer_id": "m.0pspl", 
                "aliases": [
                    "Georgetown", 
                    "Georgetown University, main campus"
                ]
            }
        ], 
        "created": "2018-02-13T05:30:06"
    }, 
    {
        "ID": "WebQTrn-937_f5f142961fbb986ee30dc0a419164821", 
        "webqsp_ID": "WebQTrn-937", 
        "webqsp_question": "what currency does thailand accept", 
        "machine_question": "what currency does the country that has the national anthem Thai National Anthem accept", 
        "question": "What currency is used where Thai National Anthem is the national anthem?", 
        "sparql": "PREFIX ns: <http://rdf.freebase.com/ns/>\nSELECT DISTINCT ?x\nWHERE {\nFILTER (?x != ?c)\nFILTER (!isLiteral(?x) OR lang(?x) = '' OR langMatches(lang(?x), 'en'))\n?c ns:location.country.national_anthem ?k .\n?k ns:government.national_anthem_of_a_country.anthem ns:m.01b8l3 . \n?c ns:location.country.currency_used ?x .\n}\n", 
        "compositionality_type": "composition", 
        "answers": [
            {
                "answer": "Thai baht", 
                "answer_id": "m.0mcb5", 
                "aliases": []
            }
        ], 
        "created": "2018-02-12T21:22:17"
    }, 
    {
        "ID": "WebQTrn-3561_b5d4da27b353f99ede98768d95492ba8", 
        "webqsp_ID": "WebQTrn-3561", 
        "webqsp_question": "which three countries share a land border with cambodia", 
        "machine_question": "which three countries share a land border with cambodia and is the country that contains Surat Thani Province", 
        "question": "Which country that shares a border with Cambodia contains the Surat Thani Province?", 
        "sparql": "PREFIX ns: <http://rdf.freebase.com/ns/>\nSELECT DISTINCT ?x\nWHERE {\nFILTER (?x != ns:m.01xbgx)\nFILTER (!isLiteral(?x) OR lang(?x) = '' OR langMatches(lang(?x), 'en'))\nns:m.01xbgx ns:location.location.adjoin_s ?y .\n?y ns:location.adjoining_relationship.adjoins ?x .\n?x ns:common.topic.notable_types ns:m.01mp .\n?x ns:location.country.administrative_divisions ns:m.018k_b . \n}", 
        "compositionality_type": "conjunction", 
        "answers": [
            {
                "answer": "Thailand", 
                "answer_id": "m.07f1x", 
                "aliases": [
                    "Siam", 
                    "Kingdom of Thailand"
                ]
            }
        ], 
        "created": "2018-02-13T02:12:27"
    }, 
    {
        "ID": "WebQTrn-1437_d08336daa754523cf13934359b794632", 
        "webqsp_ID": "WebQTrn-1437", 
        "webqsp_question": "what countries do germany border", 
        "machine_question": "what countries do germany border and the country capital is Brussels", 
        "question": "What country that borders Germany has Brussels as its capital?", 
        "sparql": "PREFIX ns: <http://rdf.freebase.com/ns/>\nSELECT DISTINCT ?x\nWHERE {\nFILTER (?x != ns:m.0345h)\nFILTER (!isLiteral(?x) OR lang(?x) = '' OR langMatches(lang(?x), 'en'))\nns:m.0345h ns:location.location.adjoin_s ?y .\n?y ns:location.adjoining_relationship.adjoins ?x .\n?x ns:common.topic.notable_types ns:m.01mp .\n?x ns:location.country.capital ns:m.0177z . \n}", 
        "compositionality_type": "conjunction", 
        "answers": [
            {
                "answer": "Belgium", 
                "answer_id": "m.0154j", 
                "aliases": [
                    "Belgique", 
                    "Belgi\u00eb", 
                    "Kingdom of Belgium"
                ]
            }
        ], 
        "created": "2018-02-12T22:18:44"
    }, 
    {
        "ID": "WebQTrn-3222_29c81279ed9a982e12f82e764083db76", 
        "webqsp_ID": "WebQTrn-3222", 
        "webqsp_question": "what movies did taylor lautner star in", 
        "machine_question": "what movies did taylor lautner star in and a tv series that has 0 season", 
        "question": "What movie series has 0 seasons and featued taylor lautner as an actor?", 
        "sparql": "PREFIX ns: <http://rdf.freebase.com/ns/>\nSELECT DISTINCT ?x\nWHERE {\nFILTER (?x != ns:m.07ldhs)\nFILTER (!isLiteral(?x) OR lang(?x) = '' OR langMatches(lang(?x), 'en'))\nns:m.07ldhs ns:film.actor.film ?y .\n?y ns:film.performance.film ?x .\n?x ns:tv.tv_series_episode.season_number \"0\" . \n}", 
        "compositionality_type": "conjunction", 
        "answers": [
            {
                "answer": "He's a Bully, Charlie Brown", 
                "answer_id": "m.02686wj", 
                "aliases": [
                    "He's a Bully Charlie Brown"
                ]
            }
        ], 
        "created": "2018-02-13T01:28:41"
    }, 
    {
        "ID": "WebQTrn-3177_a1ef4f2b041540b3ab20c9718475297d", 
        "webqsp_ID": "WebQTrn-3177", 
        "webqsp_question": "where is the time zone in florida", 
        "machine_question": "where is the time zone in the location that appointed Rick Scott to govermental position", 
        "question": "What time zone is the country with Rick Scott in a government position in?", 
        "sparql": "PREFIX ns: <http://rdf.freebase.com/ns/>\nSELECT DISTINCT ?x\nWHERE {\nFILTER (?x != ?c)\nFILTER (!isLiteral(?x) OR lang(?x) = '' OR langMatches(lang(?x), 'en'))\n?c ns:government.governmental_jurisdiction.governing_officials ?k .\n?k ns:government.government_position_held.appointed_by ns:m.0btx2g . \n?c ns:location.location.time_zones ?x .\n}\n", 
        "compositionality_type": "composition", 
        "answers": [
            {
                "answer": "UTC\u221205:00", 
                "answer_id": "m.02_37z", 
                "aliases": [
                    "UTC-5", 
                    "UTC -5", 
                    "UCT-5"
                ]
            }, 
            {
                "answer": "Central Time Zone", 
                "answer_id": "m.02fqwt", 
                "aliases": [
                    "Central Standard Time", 
                    "Central Time", 
                    "Central Daylight Time", 
                    "Central Standard Time Zone"
                ]
            }, 
            {
                "answer": "Eastern Time Zone", 
                "answer_id": "m.02hcv8", 
                "aliases": [
                    "North American Eastern Time Zone", 
                    "Eastern Time", 
                    "Eastern Daylight Time", 
                    "Eastern Standard Time Zone", 
                    "Eastern Standard Time"
                ]
            }
        ], 
        "created": "2018-02-13T01:25:03"
    }, 
    {
        "ID": "WebQTrn-2524_1ef15e22372df70baf01b72850deb14d", 
        "webqsp_ID": "WebQTrn-2524", 
        "webqsp_question": "what disease michael jackson", 
        "machine_question": "what disease the artist had a concert tour named HIStory World Tour", 
        "question": "What disease does the artist who went on the HIStory World Tour suffer from?", 
        "sparql": "PREFIX ns: <http://rdf.freebase.com/ns/>\nSELECT DISTINCT ?x\nWHERE {\nFILTER (?x != ?c)\nFILTER (!isLiteral(?x) OR lang(?x) = '' OR langMatches(lang(?x), 'en'))\n?c ns:music.artist.concert_tours ns:m.09x1nf . \n?c ns:medicine.notable_person_with_medical_condition.condition ?x .\n}\n", 
        "compositionality_type": "composition", 
        "answers": [
            {
                "answer": "Mysophobia", 
                "answer_id": "m.026k8yn", 
                "aliases": []
            }
        ], 
        "created": "2018-02-13T00:05:20"
    }, 
    {
        "ID": "WebQTest-1797_68a33792b0a1e18937dcd4b3f50d941e", 
        "webqsp_ID": "WebQTest-1797", 
        "webqsp_question": "who fought in the battle of vicksburg", 
        "machine_question": "who fought in the battle of vicksburg and the country capital is Montgomery", 
        "question": "What group fought in the Battle of Vicksburg that was based in Montgomery?", 
        "sparql": "PREFIX ns: <http://rdf.freebase.com/ns/>\nSELECT DISTINCT ?x\nWHERE {\nFILTER (?x != ns:m.01hf7f)\nFILTER (!isLiteral(?x) OR lang(?x) = '' OR langMatches(lang(?x), 'en'))\nns:m.01hf7f ns:base.culturalevent.event.entity_involved ?x .\n?x ns:location.country.capital ns:m.0fttg . \n}", 
        "compositionality_type": "conjunction", 
        "answers": [
            {
                "answer": "Confederate States of America", 
                "answer_id": "m.020d5", 
                "aliases": []
            }
        ], 
        "created": "2018-02-13T06:00:12"
    }, 
    {
        "ID": "WebQTrn-3401_4dbb23937c062d0f3a3496d2fbf26a12", 
        "webqsp_ID": "WebQTrn-3401", 
        "webqsp_question": "what are the two major religions in canada", 
        "machine_question": "what are the two major religions in canada and the religion place of worship is St. Mary's Cathedral, Batticaloa", 
        "question": "What major Canadian religion has a place of worship named St. Mary's Cathedral, Batticaloa?", 
        "sparql": "PREFIX ns: <http://rdf.freebase.com/ns/>\nSELECT DISTINCT ?x\nWHERE {\nFILTER (?x != ns:m.0d060g)\nFILTER (!isLiteral(?x) OR lang(?x) = '' OR langMatches(lang(?x), 'en'))\nns:m.0d060g ns:location.statistical_region.religions ?y .\n?y ns:location.religion_percentage.religion ?x .\n?x ns:religion.religion.places_of_worship ns:m.0100k8_q . \n}", 
        "compositionality_type": "conjunction", 
        "answers": [
            {
                "answer": "Catholicism", 
                "answer_id": "m.0c8wxp", 
                "aliases": [
                    "Roman Catholic convert", 
                    "Roman Catholic"
                ]
            }
        ], 
        "created": "2018-02-13T01:52:08"
    }, 
    {
        "ID": "WebQTrn-905_6a5960d7be1947f35b3b28d0025db014", 
        "webqsp_ID": "WebQTrn-905", 
        "webqsp_question": "who is the prime minister of new zealand now", 
        "machine_question": "who is the prime minister of the country that contains Wellington Region now", 
        "question": "The country that contains Wellington Region has what prime minister now?", 
        "sparql": "PREFIX ns: <http://rdf.freebase.com/ns/>\nSELECT DISTINCT ?x\nWHERE {\nFILTER (?x != ?c)\nFILTER (!isLiteral(?x) OR lang(?x) = '' OR langMatches(lang(?x), 'en'))\n?c ns:location.country.administrative_divisions ns:m.015q4y . \n?c ns:government.governmental_jurisdiction.governing_officials ?y .\n?y ns:government.government_position_held.office_holder ?x .\n?y ns:government.government_position_held.basic_title ns:m.060bp .\nFILTER(NOT EXISTS {?y ns:government.government_position_held.from ?sk0} || \nEXISTS {?y ns:government.government_position_held.from ?sk1 . \nFILTER(xsd:datetime(?sk1) <= \"2015-08-10\"^^xsd:dateTime) })\nFILTER(NOT EXISTS {?y ns:government.government_position_held.to ?sk2} || \nEXISTS {?y ns:government.government_position_held.to ?sk3 . \nFILTER(xsd:datetime(?sk3) >= \"2015-08-10\"^^xsd:dateTime) })\n}\n", 
        "compositionality_type": "composition", 
        "answers": [
            {
                "answer": "John Key", 
                "answer_id": "m.043tfg", 
                "aliases": [
                    "John Phillip Key", 
                    "PM"
                ]
            }
        ], 
        "created": "2018-02-12T21:19:25"
    }, 
    {
        "ID": "WebQTrn-2674_831fb3325644a924d433e2b267f6d238", 
        "webqsp_ID": "WebQTrn-2674", 
        "webqsp_question": "where is usc from", 
        "machine_question": "where is usc from and is the us state that has a capital named Columbia", 
        "question": "Which state includes a university that sometimes goes by the name USC and also includes a city named Columbia?", 
        "sparql": "PREFIX ns: <http://rdf.freebase.com/ns/>\nSELECT DISTINCT ?x\nWHERE {\nFILTER (?x != ns:m.03tw2s)\nFILTER (!isLiteral(?x) OR lang(?x) = '' OR langMatches(lang(?x), 'en'))\nns:m.03tw2s ns:location.location.containedby ?x .\n?x ns:location.us_state.capital ns:m.0fv_t . \n}", 
        "compositionality_type": "conjunction", 
        "answers": [
            {
                "answer": "South Carolina", 
                "answer_id": "m.06yxd", 
                "aliases": [
                    "SC", 
                    "Palmetto State"
                ]
            }
        ], 
        "created": "2018-02-13T00:25:17"
    }, 
    {
        "ID": "WebQTrn-3082_04dbed66ba17d35bf79f72e04bbcc776", 
        "webqsp_ID": "WebQTrn-3082", 
        "webqsp_question": "what all countries are in south america", 
        "machine_question": "what all countries are in south america and is the location that appointed Elizabeth II to govermental position", 
        "question": "What country in South America is a aprt of the nation that appointed Elizabeth II as a member of their government?", 
        "sparql": "PREFIX ns: <http://rdf.freebase.com/ns/>\nSELECT DISTINCT ?x\nWHERE {\nFILTER (?x != ns:m.06n3y)\nFILTER (!isLiteral(?x) OR lang(?x) = '' OR langMatches(lang(?x), 'en'))\nns:m.06n3y ns:location.location.contains ?x .\n?x ns:common.topic.notable_types ns:m.01mp .\n?x ns:government.governmental_jurisdiction.governing_officials ?c .\n?c ns:government.government_position_held.appointed_by ns:m.0d1_f . \n}", 
        "compositionality_type": "conjunction", 
        "answers": [
            {
                "answer": "Falkland Islands", 
                "answer_id": "m.02wmy", 
                "aliases": [
                    "Islas Malvinas"
                ]
            }
        ], 
        "created": "2018-02-13T01:12:18"
    }, 
    {
        "ID": "WebQTrn-1864_9dc4e22121d3a46d45b8f9bd9e8c7013", 
        "webqsp_ID": "WebQTrn-1864", 
        "webqsp_question": "which asian country has the biggest population", 
        "machine_question": "which the location time zone is ASEAN Common Time Zone country has the biggest population", 
        "question": "Which country that is situated in the ASEAN Common Time Zone has the largest population?", 
        "sparql": "PREFIX ns: <http://rdf.freebase.com/ns/>\nSELECT DISTINCT ?x\nWHERE {\nFILTER (?x != ?c)\nFILTER (!isLiteral(?x) OR lang(?x) = '' OR langMatches(lang(?x), 'en'))\n?c ns:location.location.time_zones ns:m.0bzt6c . \n?c ns:location.location.contains ?x .\n?x ns:common.topic.notable_types ns:m.01mp .\n?x ns:topic_server.population_number ?sk0 .\n}\nORDER BY DESC(xsd:float(?sk0))\nLIMIT 1\n", 
        "compositionality_type": "composition", 
        "answers": [
            {
                "answer": "India", 
                "answer_id": "m.03rk0", 
                "aliases": [
                    "Bharat Ganrajya", 
                    "Hindustan", 
                    "Bharat", 
                    "Republic of India", 
                    "The Republic of India"
                ]
            }
        ], 
        "created": "2018-02-12T22:59:40"
    }, 
    {
        "ID": "WebQTrn-3134_175da2d6cec3598faf048e9722cbbc47", 
        "webqsp_ID": "WebQTrn-3134", 
        "webqsp_question": "what continent is mexico located on", 
        "machine_question": "what continent is the country that contains Tabasco located on", 
        "question": "The country that contains Tabasco is located in what continent?", 
        "sparql": "PREFIX ns: <http://rdf.freebase.com/ns/>\nSELECT DISTINCT ?x\nWHERE {\nFILTER (?x != ?c)\nFILTER (!isLiteral(?x) OR lang(?x) = '' OR langMatches(lang(?x), 'en'))\n?c ns:location.country.administrative_divisions ns:m.01bkt4 . \n?c ns:base.locations.countries.continent ?x .\n}\n", 
        "compositionality_type": "composition", 
        "answers": [
            {
                "answer": "North America", 
                "answer_id": "m.059g4", 
                "aliases": []
            }
        ], 
        "created": "2018-02-13T01:17:27"
    }, 
    {
        "ID": "WebQTrn-1841_b8df00139e3fa59b8633ef551ed8ca9f", 
        "webqsp_ID": "WebQTrn-1841", 
        "webqsp_question": "what are popular sports in spain", 
        "machine_question": "what are popular sports in spain and is the team won the 2010 FIFA World Cup championship", 
        "question": "What popular sport in Spain has a team that won the 2010 FIFA World Cup championship?", 
        "sparql": "PREFIX ns: <http://rdf.freebase.com/ns/>\nSELECT DISTINCT ?x\nWHERE {\nFILTER (?x != ns:m.06mkj)\nFILTER (!isLiteral(?x) OR lang(?x) = '' OR langMatches(lang(?x), 'en'))\nns:m.06mkj ns:sports.sports_team_location.teams ?x .\n?x ns:sports.sports_team.championships ns:m.016h2b . \n}", 
        "compositionality_type": "conjunction", 
        "answers": [
            {
                "answer": "Spain national football team", 
                "answer_id": "m.02w64f", 
                "aliases": [
                    "La Furia", 
                    "Spain Mens National Football Team", 
                    "Spain Mens Soccer Team", 
                    "Spain Soccer Team", 
                    "Spain Men's Football Team", 
                    "Spain national football", 
                    "Spain Football Team", 
                    "Spain Men's National Soccer Team", 
                    "Spain Mens National Soccer Team", 
                    "Spain National Soccer Team", 
                    "La Roja", 
                    "Spain National Football Team", 
                    "La Furia Roja", 
                    "Spain Mens Football Team", 
                    "Spain Men's Soccer Team", 
                    "Spain Men's National Football Team"
                ]
            }
        ], 
        "created": "2018-02-12T22:57:24"
    }, 
    {
        "ID": "WebQTrn-124_f3990dc9aa470fa81ec4cf2912a9924f", 
        "webqsp_ID": "WebQTrn-124", 
        "webqsp_question": "what movie did angelina jolie direct", 
        "machine_question": "what movie did angelina jolie direct and is the film has a charcter named Ajla", 
        "question": "Which movie with a character called Ajila was directed by Angelina Jolie?", 
        "sparql": "PREFIX ns: <http://rdf.freebase.com/ns/>\nSELECT DISTINCT ?x\nWHERE {\nFILTER (?x != ns:m.0f4vbz)\nFILTER (!isLiteral(?x) OR lang(?x) = '' OR langMatches(lang(?x), 'en'))\nns:m.0f4vbz ns:film.director.film ?x .\n?x ns:film.film.starring ?c .\n?c ns:film.performance.character ns:m.0gwfc0b . \n}", 
        "compositionality_type": "conjunction", 
        "answers": [
            {
                "answer": "In the Land of Blood and Honey", 
                "answer_id": "m.0gttw8n", 
                "aliases": [
                    "En tierra de sangre y miel", 
                    "Be'eretz shel dam udvash", 
                    "Au pays du sang et du miel", 
                    "A v\u00e9r \u00e9s m\u00e9z f\u00f6ldj\u00e9n", 
                    "U zemlji krvi i meda", 
                    "Kan ve Ask", 
                    "Na Terra de Sangue e Mel"
                ]
            }
        ], 
        "created": "2018-02-12T19:50:05"
    }, 
    {
        "ID": "WebQTrn-1537_9f64f45a9133fdf806c1dc2e5aec6abd", 
        "webqsp_ID": "WebQTrn-1537", 
        "webqsp_question": "what other languages does switzerland speak", 
        "machine_question": "what other languages does the country that contains Canton of Jura speak", 
        "question": "People from the country that contains Canton of Jura speak what languages?", 
        "sparql": "PREFIX ns: <http://rdf.freebase.com/ns/>\nSELECT DISTINCT ?x\nWHERE {\nFILTER (?x != ?c)\nFILTER (!isLiteral(?x) OR lang(?x) = '' OR langMatches(lang(?x), 'en'))\n?c ns:location.country.administrative_divisions ns:m.01l8hj . \n?c ns:location.country.languages_spoken ?x .\n}\n", 
        "compositionality_type": "composition", 
        "answers": [
            {
                "answer": "Italian Language", 
                "answer_id": "m.02bjrlw", 
                "aliases": [
                    "Italiano", 
                    "Italian"
                ]
            }, 
            {
                "answer": "German Language", 
                "answer_id": "m.04306rv", 
                "aliases": [
                    "German, Standard Language", 
                    "Deutsch", 
                    "German", 
                    "Tedesco", 
                    "High German", 
                    "Hochdeutsch", 
                    "German, Standard"
                ]
            }, 
            {
                "answer": "French", 
                "answer_id": "m.064_8sq", 
                "aliases": [
                    "Francais", 
                    "Fran\u00e7ais", 
                    "French", 
                    "French language"
                ]
            }, 
            {
                "answer": "Romansh language", 
                "answer_id": "m.06ctk", 
                "aliases": [
                    "Rhaeto-romance", 
                    "Romanche", 
                    "Romansh", 
                    "Rheto-romance"
                ]
            }
        ], 
        "created": "2018-02-12T22:29:28"
    }, 
    {
        "ID": "WebQTest-153_0345a97dbf60947ca0cbf206c0bbba50", 
        "webqsp_ID": "WebQTest-153", 
        "webqsp_question": "what are the sights to see in madrid", 
        "machine_question": "what are the sights to see in madrid and is the museum that was established in 1819", 
        "question": "What museum in Madrid that was established in 1819?", 
        "sparql": "PREFIX ns: <http://rdf.freebase.com/ns/>\nSELECT DISTINCT ?x\nWHERE {\nFILTER (?x != ns:m.056_y)\nFILTER (!isLiteral(?x) OR lang(?x) = '' OR langMatches(lang(?x), 'en'))\nns:m.056_y ns:travel.travel_destination.tourist_attractions ?x .\n?x ns:architecture.museum.established \"1819\"^^xsd:dateTime . \n}", 
        "compositionality_type": "conjunction", 
        "answers": [
            {
                "answer": "Museo Nacional Del Prado", 
                "answer_id": "m.01hlq3", 
                "aliases": [
                    "Museo del Prado, Madrid", 
                    "Prado Museum"
                ]
            }
        ], 
        "created": "2018-02-13T02:50:35"
    }, 
    {
        "ID": "WebQTest-538_49b4e9304f18a0a1cbe37bb162f61131", 
        "webqsp_ID": "WebQTest-538", 
        "webqsp_question": "what are all the movies taylor swift has been in", 
        "machine_question": "what are all the movies the person education institution is West Reading El Ctr has been in", 
        "question": "WHat movies have the actress who is an alumni for West Reading El Ctr a part of?", 
        "sparql": "PREFIX ns: <http://rdf.freebase.com/ns/>\nSELECT DISTINCT ?x\nWHERE {\nFILTER (?x != ?c)\nFILTER (!isLiteral(?x) OR lang(?x) = '' OR langMatches(lang(?x), 'en'))\n?c ns:people.person.education ?k .\n?k ns:education.education.institution ns:m.076czr3 . \n?c ns:film.actor.film ?y .\n?y ns:film.performance.film ?x .\n}\n", 
        "compositionality_type": "composition", 
        "answers": [
            {
                "answer": "Hannah Montana: The Movie", 
                "answer_id": "m.02x3lt7", 
                "aliases": [
                    "Hana Montana: filmas", 
                    "Hannah Montana - The Movie", 
                    "Hannah Montana - La pel\u00edcula", 
                    "Hanna Montana - La pel\u00edcula", 
                    "Hannah Montana: I tainia", 
                    "Hannah Montana - Der Film", 
                    "Hannah Montana: A film", 
                    "Hannah Montana", 
                    "Hannah Montana - filmen", 
                    "Hannah Montana - Le film", 
                    "Hannah Montana film", 
                    "Hanna Montana - B\u00ed\u00f3myndin", 
                    "Hannah Montana - O Filme"
                ]
            }, 
            {
                "answer": "Valentine's Day", 
                "answer_id": "m.06_wqk4", 
                "aliases": []
            }, 
            {
                "answer": "The Lorax", 
                "answer_id": "m.087wc7n", 
                "aliases": [
                    "O Lorax: Em Busca da Tr\u00fafula Perdida", 
                    "El L\u00f3rax", 
                    "Lorax - skovens beskytter", 
                    "Der Lorax (3D)", 
                    "Dr. Seuss' The Lorax: An IMAX 3D Experience", 
                    "Dr. Seuss' The Lorax", 
                    "El L\u00f3rax en busca de la tr\u00fafula perdida", 
                    "Lorax: En busca de la tr\u00fafula perdida", 
                    "Ha'Lorex", 
                    "El L\u00f3rax: En busca de la tr\u00fafula perdida", 
                    "Lorax - Il guardiano della foresta", 
                    "Lorax", 
                    "Loraksas", 
                    "Lorax - Skogens vokter", 
                    "Lorax: Zastitnik sume", 
                    "Loraks", 
                    "\u041b\u043e\u0440\u0430\u043a\u0441", 
                    "Le Lorax"
                ]
            }, 
            {
                "answer": "Jonas Brothers: The Concert Experience", 
                "answer_id": "m.0djb8hx", 
                "aliases": [
                    "Jonas Brothers: The 3D Concert Experience"
                ]
            }, 
            {
                "answer": "The Giver", 
                "answer_id": "m.0dx5q8", 
                "aliases": []
            }
        ], 
        "created": "2018-02-13T03:44:58"
    }, 
    {
        "ID": "WebQTrn-388_ea3f0a08ef01a65121974cd4385ce1a3", 
        "webqsp_ID": "WebQTrn-388", 
        "webqsp_question": "what language do they speak in iceland wikipedia", 
        "machine_question": "what language do they speak in the currency used in the country is Icelandic kr\u00c3\u00b3na wikipedia", 
        "question": "What language is used in the country that uses Icelandic kr\u00c3\u00b3na?", 
        "sparql": "PREFIX ns: <http://rdf.freebase.com/ns/>\nSELECT DISTINCT ?x\nWHERE {\nFILTER (?x != ?c)\nFILTER (!isLiteral(?x) OR lang(?x) = '' OR langMatches(lang(?x), 'en'))\n?c ns:location.country.currency_used ns:m.012nk9 . \n?c ns:location.country.languages_spoken ?x .\n}\n", 
        "compositionality_type": "composition", 
        "answers": [
            {
                "answer": "Icelandic Language", 
                "answer_id": "m.01gmkg", 
                "aliases": [
                    "\u00cdslenska", 
                    "Icelandic", 
                    "Islenska"
                ]
            }
        ], 
        "created": "2018-02-12T20:20:34"
    }, 
    {
        "ID": "WebQTrn-764_af2b17d82c312c155dde75a5ce24621d", 
        "webqsp_ID": "WebQTrn-764", 
        "webqsp_question": "who was the colts coach in 2011", 
        "machine_question": "who was the the sports team owner is Jim Irsay coach in 2011", 
        "question": "Who was the 2011 coach of the team owned by Jim Irsay?", 
        "sparql": "PREFIX ns: <http://rdf.freebase.com/ns/>\nSELECT DISTINCT ?x\nWHERE {\nFILTER (?x != ?c)\nFILTER (!isLiteral(?x) OR lang(?x) = '' OR langMatches(lang(?x), 'en'))\n?c ns:sports.professional_sports_team.owner_s ns:m.0ff334 . \n?c ns:american_football.football_team.historical_coaching_staff ?y .\n?y ns:american_football.football_historical_coach_position.coach ?x .\nFILTER(NOT EXISTS {?y ns:american_football.football_historical_coach_position.from ?sk0} || \nEXISTS {?y ns:american_football.football_historical_coach_position.from ?sk1 . \nFILTER(xsd:datetime(?sk1) <= \"2011-12-31\"^^xsd:dateTime) })\nFILTER(NOT EXISTS {?y ns:american_football.football_historical_coach_position.to ?sk2} || \nEXISTS {?y ns:american_football.football_historical_coach_position.to ?sk3 . \nFILTER(xsd:datetime(?sk3) >= \"2011-01-01\"^^xsd:dateTime) })\n}\n", 
        "compositionality_type": "composition", 
        "answers": [
            {
                "answer": "Jim Caldwell", 
                "answer_id": "m.0bjdtb", 
                "aliases": []
            }
        ], 
        "created": "2018-02-12T21:00:37"
    }, 
    {
        "ID": "WebQTrn-3633_5c40efa4fbf0a754da96be5c3632a774", 
        "webqsp_ID": "WebQTrn-3633", 
        "webqsp_question": "who is keyshia cole married too", 
        "machine_question": "who is the artist had a concert tour named A Different Me Tour married too", 
        "question": "Who is the husband of the artist who had a tour named A Different Me?", 
        "sparql": "PREFIX ns: <http://rdf.freebase.com/ns/>\nSELECT DISTINCT ?x\nWHERE {\nFILTER (?x != ?c)\nFILTER (!isLiteral(?x) OR lang(?x) = '' OR langMatches(lang(?x), 'en'))\n?c ns:music.artist.concert_tours ns:m.05zw52r . \n?c ns:people.person.spouse_s ?y .\n?y ns:people.marriage.spouse ?x .\n?y ns:people.marriage.type_of_union ns:m.04ztj .\nFILTER(NOT EXISTS {?y ns:people.marriage.from ?sk0} || \nEXISTS {?y ns:people.marriage.from ?sk1 . \nFILTER(xsd:datetime(?sk1) <= \"2015-08-10\"^^xsd:dateTime) })\nFILTER(NOT EXISTS {?y ns:people.marriage.to ?sk2} || \nEXISTS {?y ns:people.marriage.to ?sk3 . \nFILTER(xsd:datetime(?sk3) >= \"2015-08-10\"^^xsd:dateTime) })\n}\n", 
        "compositionality_type": "composition", 
        "answers": [
            {
                "answer": "Daniel Gibson", 
                "answer_id": "m.0clc60", 
                "aliases": [
                    "Daniel Hiram Gibson"
                ]
            }
        ], 
        "created": "2018-02-13T02:17:09"
    }, 
    {
        "ID": "WebQTrn-2722_8babdaa9ecd05a72e3227b43b1f98771", 
        "webqsp_ID": "WebQTrn-2722", 
        "webqsp_question": "what did jordyn wieber win gold for", 
        "machine_question": "what did the person education institution is Dewitt High School win gold for", 
        "question": "For what did the personage who was educated at the Dewitt High School win a gold medal?", 
        "sparql": "PREFIX ns: <http://rdf.freebase.com/ns/>\nSELECT DISTINCT ?x\nWHERE {\nFILTER (?x != ?c)\nFILTER (!isLiteral(?x) OR lang(?x) = '' OR langMatches(lang(?x), 'en'))\n?c ns:people.person.education ?k .\n?k ns:education.education.institution ns:m.07635c3 . \n?c ns:olympics.olympic_athlete.medals_won ?y .\n?y ns:olympics.olympic_medal_honor.event ?x .\n?y ns:olympics.olympic_medal_honor.medal ns:m.02lpp7 .\n}\n", 
        "compositionality_type": "composition", 
        "answers": [
            {
                "answer": "Gymnastics at the 2012 Summer Olympics \u2013 Women's artistic team all-around", 
                "answer_id": "m.0h_f7xn", 
                "aliases": []
            }
        ], 
        "created": "2018-02-13T00:31:46"
    }, 
    {
        "ID": "WebQTrn-3619_710e00b243ea6b977ae2404c69e8d894", 
        "webqsp_ID": "WebQTrn-3619", 
        "webqsp_question": "where is italian spoken around the world", 
        "machine_question": "where is italian spoken around the world and the currency used in the country is Mexican peso", 
        "question": "Which country uses the Mexican peso and Italian is spoken there?", 
        "sparql": "PREFIX ns: <http://rdf.freebase.com/ns/>\nSELECT DISTINCT ?x\nWHERE {\nFILTER (?x != ns:m.02bjrlw)\nFILTER (!isLiteral(?x) OR lang(?x) = '' OR langMatches(lang(?x), 'en'))\nns:m.02bjrlw ns:language.human_language.countries_spoken_in ?x .\n?x ns:location.country.currency_used ns:m.012ts8 . \n}", 
        "compositionality_type": "conjunction", 
        "answers": [
            {
                "answer": "Mexico", 
                "answer_id": "m.0b90_r", 
                "aliases": [
                    "M\u00e9jico", 
                    "M\u00e9xico", 
                    "Estados Unidos Mexicanos", 
                    "United Mexican States"
                ]
            }
        ], 
        "created": "2018-02-13T02:15:27"
    }, 
    {
        "ID": "WebQTrn-2920_1fbd766e1b1bf978da23e8646cadf3a1", 
        "webqsp_ID": "WebQTrn-2920", 
        "webqsp_question": "where does frida kahlo live now", 
        "machine_question": "where does the person education institution is Colegio Alem\u00c3\u00a1n Alexander von Humboldt live now", 
        "question": "Where does the famous person who attended Colegio Alem\u00c3\u00a1n Alexander von Humboldt live now?", 
        "sparql": "PREFIX ns: <http://rdf.freebase.com/ns/>\nSELECT DISTINCT ?x\nWHERE {\nFILTER (?x != ?c)\nFILTER (!isLiteral(?x) OR lang(?x) = '' OR langMatches(lang(?x), 'en'))\n?c ns:people.person.education ?k .\n?k ns:education.education.institution ns:m.02r4cn1 . \n?c ns:people.person.places_lived ?y .\n?y ns:people.place_lived.location ?x .\nFILTER(NOT EXISTS {?y ns:people.place_lived.end_date ?sk0} || \nEXISTS {?y ns:people.place_lived.end_date ?sk1 . \nFILTER(xsd:datetime(?sk1) >= \"2015-08-10\"^^xsd:dateTime) })\nFILTER(NOT EXISTS {?y ns:people.place_lived.start_date ?sk2} || \nEXISTS {?y ns:people.place_lived.start_date ?sk3 . \nFILTER(xsd:datetime(?sk3) <= \"2015-08-10\"^^xsd:dateTime) })\n}\n", 
        "compositionality_type": "composition", 
        "answers": [
            {
                "answer": "Coyoac\u00e1n", 
                "answer_id": "m.01t8n4", 
                "aliases": [
                    "Coyoacan", 
                    "Coyoac\u00e1n, D.F."
                ]
            }, 
            {
                "answer": "Mexico City", 
                "answer_id": "m.04sqj", 
                "aliases": [
                    "La Ciudad de los Palacios", 
                    "Zona Metropolitana de la Ciudad de M\u00e9xico", 
                    "The Federal District", 
                    "Ciudad de M\u00e9xico", 
                    "Mexico", 
                    "DF", 
                    "M\u00e9xico, D.F.", 
                    "D.F.", 
                    "Mexico City Metropolitan Zone", 
                    "Distritofederal", 
                    "Tenochtitl\u00e1n", 
                    "Mexican Federal District", 
                    "M\u00e9xico", 
                    "Zona Metropolitana del Valle de M\u00e9xico", 
                    "Metropolitan Area of the Valley of Mexico", 
                    "Ciudad De Mexico", 
                    "Distrito Federal", 
                    "Cidade do M\u00e9xico", 
                    "Greater Mexico City"
                ]
            }
        ], 
        "created": "2018-02-13T00:54:21"
    }, 
    {
        "ID": "WebQTrn-1474_71550f233e235825483f2bdb07be8e35", 
        "webqsp_ID": "WebQTrn-1474", 
        "webqsp_question": "what countries do they speak italian", 
        "machine_question": "what countries do they speak italian and the country capital is Buenos Aires", 
        "question": "What south American country speaking Italian is home to the capital City of Buenos Aires?", 
        "sparql": "PREFIX ns: <http://rdf.freebase.com/ns/>\nSELECT DISTINCT ?x\nWHERE {\nFILTER (?x != ns:m.02bjrlw)\nFILTER (!isLiteral(?x) OR lang(?x) = '' OR langMatches(lang(?x), 'en'))\nns:m.02bjrlw ns:language.human_language.countries_spoken_in ?x .\n?x ns:location.country.capital ns:m.01ly5m . \n}", 
        "compositionality_type": "conjunction", 
        "answers": [
            {
                "answer": "Argentina", 
                "answer_id": "m.0jgd", 
                "aliases": [
                    "The Argentine", 
                    "Agrentina ", 
                    "Argentine Republic"
                ]
            }
        ], 
        "created": "2018-02-12T22:23:42"
    }, 
    {
        "ID": "WebQTest-1422_3af45c10df6a62128f14f2c662a7480b", 
        "webqsp_ID": "WebQTest-1422", 
        "webqsp_question": "what language do they speak in sweden yahoo", 
        "machine_question": "what language do they speak in the country that has the national anthem Du gamla, Du fria yahoo", 
        "question": "What languages are spoken in the country that has the national anthem \"Du gamla, Du fria\"?", 
        "sparql": "PREFIX ns: <http://rdf.freebase.com/ns/>\nSELECT DISTINCT ?x\nWHERE {\nFILTER (?x != ?c)\nFILTER (!isLiteral(?x) OR lang(?x) = '' OR langMatches(lang(?x), 'en'))\n?c ns:location.country.national_anthem ?k .\n?k ns:government.national_anthem_of_a_country.anthem ns:m.0m6w8 . \n?c ns:location.country.languages_spoken ?x .\n}\n", 
        "compositionality_type": "composition", 
        "answers": [
            {
                "answer": "Romani language", 
                "answer_id": "m.012psb", 
                "aliases": [
                    "Romany", 
                    "Romani", 
                    "Romany language"
                ]
            }, 
            {
                "answer": "Finnish Language", 
                "answer_id": "m.01gp_d", 
                "aliases": [
                    "Suomea", 
                    "Finnish"
                ]
            }, 
            {
                "answer": "Me\u00e4nkieli", 
                "answer_id": "m.02z5h0", 
                "aliases": [
                    "Torne Valley Finnish", 
                    "Finnish, Tornedalen", 
                    "North Finnish", 
                    "Finnish, Tornedalen Language", 
                    "Tornedalsfinska", 
                    "Tornedalen", 
                    "Meankieli"
                ]
            }, 
            {
                "answer": "Swedish Sign Language", 
                "answer_id": "m.02zb99n", 
                "aliases": [
                    "Swedish Sign"
                ]
            }, 
            {
                "answer": "Turoyo Language", 
                "answer_id": "m.04lmb2", 
                "aliases": [
                    "Suryoyo", 
                    "S\u00fcryani", 
                    "Syryoyo", 
                    "Turoyo", 
                    "Turani"
                ]
            }, 
            {
                "answer": "Swedish Language", 
                "answer_id": "m.06mp7", 
                "aliases": [
                    "Swedish", 
                    "Ruotsi", 
                    "Svenska"
                ]
            }, 
            {
                "answer": "Yiddish Language", 
                "answer_id": "m.0880p", 
                "aliases": [
                    "Yiddish"
                ]
            }
        ], 
        "created": "2018-02-13T05:20:03"
    }, 
    {
        "ID": "WebQTrn-302_12fd6204508d6d6080e5db216fe9e7e9", 
        "webqsp_ID": "WebQTrn-302", 
        "webqsp_question": "who are the green bay packers owned by", 
        "machine_question": "who are the the team won the Super Bowl I championship owned by", 
        "question": "The Super Bowl I championship team was owned by whom?", 
        "sparql": "PREFIX ns: <http://rdf.freebase.com/ns/>\nSELECT DISTINCT ?x\nWHERE {\nFILTER (?x != ?c)\nFILTER (!isLiteral(?x) OR lang(?x) = '' OR langMatches(lang(?x), 'en'))\n?c ns:sports.sports_team.championships ns:m.076lp . \n?c ns:sports.professional_sports_team.owner_s ?x .\n}\n", 
        "compositionality_type": "composition", 
        "answers": [
            {
                "answer": "Green Bay Packers Board of Directors", 
                "answer_id": "m.0c24nj", 
                "aliases": []
            }
        ], 
        "created": "2018-02-12T20:12:11"
    }, 
    {
        "ID": "WebQTest-1608_af0a37b13a66138a543af50c2ac24bb8", 
        "webqsp_ID": "WebQTest-1608", 
        "webqsp_question": "what language is mainly spoken in egypt", 
        "machine_question": "what language is mainly spoken in the location that appointed Adly Mansour to govermental position", 
        "question": "People from the location that appointed Adly Mansour to govermental position speak what languages?", 
        "sparql": "PREFIX ns: <http://rdf.freebase.com/ns/>\nSELECT DISTINCT ?x\nWHERE {\nFILTER (?x != ?c)\nFILTER (!isLiteral(?x) OR lang(?x) = '' OR langMatches(lang(?x), 'en'))\n?c ns:government.governmental_jurisdiction.governing_officials ?k .\n?k ns:government.government_position_held.appointed_by ns:m.0w5nf92 . \n?c ns:location.country.languages_spoken ?x .\n?x ns:language.human_language.main_country ?c .\n}\n", 
        "compositionality_type": "composition", 
        "answers": [
            {
                "answer": "Siwi Language", 
                "answer_id": "m.012zfy", 
                "aliases": [
                    "Siwa", 
                    "Siwi", 
                    "Oasis Berber", 
                    "Sioua", 
                    "Zenati"
                ]
            }, 
            {
                "answer": "Egyptian Arabic", 
                "answer_id": "m.02hx2cr", 
                "aliases": [
                    "Arabic, Egyptian Spoken", 
                    "Lower Egypt Arabic", 
                    "Arabic, Egyptian Spoken Language", 
                    "Normal Egyptian Arabic", 
                    "Massry"
                ]
            }, 
            {
                "answer": "Sa'idi Arabic", 
                "answer_id": "m.02hxbhg", 
                "aliases": [
                    "Sa`idi", 
                    "Upper Egypt Arabic", 
                    "Sa<idi"
                ]
            }, 
            {
                "answer": "Bedawi Arabic", 
                "answer_id": "m.03wc2kf", 
                "aliases": [
                    "Bedawi", 
                    "Arabic Bedawi language", 
                    "Arabic, Levantine Bedawi Spoken", 
                    "Bedawi Arabic language", 
                    "Eastern Egyptian Bedawi Arabic language", 
                    "Levantine Bedawi Arabic", 
                    "Arabic, Eastern Egyptian Bedawi Spoken Language"
                ]
            }
        ], 
        "created": "2018-02-13T05:39:23"
    }, 
    {
        "ID": "WebQTrn-691_83bc5353a8c36e15eff039e0fda79414", 
        "webqsp_ID": "WebQTrn-691", 
        "webqsp_question": "where is headquarters of verizon", 
        "machine_question": "where is headquarters of the child organization is Bell Atlantic Network Integration, Inc.", 
        "question": "Bell Atlantic Network is the child organization with headquarters where?", 
        "sparql": "PREFIX ns: <http://rdf.freebase.com/ns/>\nSELECT DISTINCT ?x\nWHERE {\nFILTER (?x != ?c)\nFILTER (!isLiteral(?x) OR lang(?x) = '' OR langMatches(lang(?x), 'en'))\n?c ns:organization.organization.child ?k .\n?k ns:organization.organization_relationship.child ns:m.02_8366 . \n?c ns:organization.organization.headquarters ?y .\n?y ns:location.mailing_address.citytown ?x .\n}\n", 
        "compositionality_type": "composition", 
        "answers": [
            {
                "answer": "New York City", 
                "answer_id": "m.02_286", 
                "aliases": [
                    "The City that Never Sleeps", 
                    "New York, U.S.A.", 
                    "/m/02_286", 
                    "New Yrok City", 
                    "New York City, New York, USA", 
                    "Empire City", 
                    "City of New York", 
                    "New York City, New York", 
                    "New-York", 
                    "\u30cb\u30e5\u30fc\u30e8\u30fc\u30af\u5e02", 
                    "Gotham", 
                    "New York", 
                    "New York, NY", 
                    "The Melting Pot", 
                    "Richmond County / New York city", 
                    "NYC", 
                    "The Big Apple", 
                    "New York, N.Y.", 
                    "New York, New York", 
                    "The Capital of the World"
                ]
            }
        ], 
        "created": "2018-02-12T20:56:30"
    }, 
    {
        "ID": "WebQTest-1874_903862ba8e6858e19627acb4f736619f", 
        "webqsp_ID": "WebQTest-1874", 
        "webqsp_question": "who does portugal trade with", 
        "machine_question": "who does portugal trade with and is the country that contains Emirate of Ajman", 
        "question": "Who trades with Portugal that contains the Emirate of Ajman?", 
        "sparql": "#MANUAL SPARQL\nPREFIX ns: <http://rdf.freebase.com/ns/>\nSELECT DISTINCT ?x \nWHERE {\n\tFILTER (?x != ns:m.05r4w)\n\t{ \n\t  ns:m.05r4w ns:location.statistical_region.places_exported_to ?y .\n\t  ?y ns:location.imports_and_exports.exported_to ?x . \n\t}\n\tUNION\n\t{\n\t  ns:m.05r4w ns:location.statistical_region.places_imported_from ?y .\n\t  ?y ns:location.imports_and_exports.imported_from ?x . \n\t}?x ns:location.country.administrative_divisions ns:m.01430j . \n}", 
        "compositionality_type": "conjunction", 
        "answers": [
            {
                "answer": "United Arab Emirates", 
                "answer_id": "m.0j1z8", 
                "aliases": [
                    "Emirates", 
                    "UAE"
                ]
            }
        ], 
        "created": "2018-02-13T06:13:10"
    }, 
    {
        "ID": "WebQTest-730_0a1c359b9f9380ec4e7baa54dcb7d0b0", 
        "webqsp_ID": "WebQTest-730", 
        "webqsp_question": "what record label is kelly clarkson signed with", 
        "machine_question": "what record label is the artist had a concert tour named My December Tour signed with", 
        "question": "With which record label did the artist of My December Tour sign with?", 
        "sparql": "PREFIX ns: <http://rdf.freebase.com/ns/>\nSELECT DISTINCT ?x\nWHERE {\nFILTER (?x != ?c)\nFILTER (!isLiteral(?x) OR lang(?x) = '' OR langMatches(lang(?x), 'en'))\n?c ns:music.artist.concert_tours ns:m.02q_l60 . \n?c ns:music.artist.label ?x .\n}\n", 
        "compositionality_type": "composition", 
        "answers": [
            {
                "answer": "RCA Records", 
                "answer_id": "m.0181dw", 
                "aliases": [
                    "RCA Victor Records", 
                    "RCA"
                ]
            }, 
            {
                "answer": "Sony BMG", 
                "answer_id": "m.03mp8k", 
                "aliases": [
                    "Sony BMG Music Entertainment"
                ]
            }, 
            {
                "answer": "Sony Music Entertainment", 
                "answer_id": "m.043g7l", 
                "aliases": [
                    "SME", 
                    "Sony Music"
                ]
            }, 
            {
                "answer": "19 Recordings", 
                "answer_id": "m.0rpfr83", 
                "aliases": []
            }
        ], 
        "created": "2018-02-13T04:03:13"
    }, 
    {
        "ID": "WebQTrn-1359_2443bf06815cf0d93b1a271a1a49062f", 
        "webqsp_ID": "WebQTrn-1359", 
        "webqsp_question": "what countries was the vietnam war between", 
        "machine_question": "what countries was the vietnam war between and is the location that appointed Kevin Rudd to govermental position", 
        "question": "Which nation has Kevin Rudd as a member of their government and was a participant in the Vietnam war?", 
        "sparql": "PREFIX ns: <http://rdf.freebase.com/ns/>\nSELECT DISTINCT ?x\nWHERE {\nFILTER (?x != ns:m.07_nf)\nFILTER (!isLiteral(?x) OR lang(?x) = '' OR langMatches(lang(?x), 'en'))\nns:m.07_nf ns:military.military_conflict.combatants ?y .\n?y ns:military.military_combatant_group.combatants ?x .\n?x ns:government.governmental_jurisdiction.governing_officials ?c .\n?c ns:government.government_position_held.appointed_by ns:m.021l9k . \n}", 
        "compositionality_type": "conjunction", 
        "answers": [
            {
                "answer": "Australia", 
                "answer_id": "m.0chghy", 
                "aliases": [
                    "The Commonwealth of Australia", 
                    "Commonwealth of Australia"
                ]
            }
        ], 
        "created": "2018-02-12T22:10:11"
    }, 
    {
        "ID": "WebQTest-813_f57701d4be9b1b3ad7b426121ad27b5c", 
        "webqsp_ID": "WebQTest-813", 
        "webqsp_question": "who was john f kennedy 's family", 
        "machine_question": "who was john f kennedy 's family and held his govermental position from 1934", 
        "question": "Who held his governmental position from 1934 and was John F. Kennedy's family?", 
        "sparql": "#MANUAL SPARQL\nPREFIX ns: <http://rdf.freebase.com/ns/>\nSELECT DISTINCT ?x\nWHERE {\n\tFILTER (?x != ns:m.0d3k14)\n\t{ \n\t  # Parents\n\t  ns:m.0d3k14 ns:people.person.parents ?x .\n\t}\n\tUNION\n\t{\n\t  # Children\n\t  ns:m.0d3k14 ns:people.person.children ?x .\n\t}\n\tUNION\n\t{\n\t  # Siblings\n\t  ns:m.0d3k14 ns:people.person.sibling_s ?y .\n\t  ?y ns:people.sibling_relationship.sibling ?x .\n\t}\n\tUNION\n\t{\n\t  # Spouse\n\t  ns:m.0d3k14 ns:people.person.spouse_s ?y .\n\t  ?y ns:people.marriage.spouse ?x .\n\t  ?y ns:people.marriage.type_of_union ns:m.04ztj .\n\t  FILTER (NOT EXISTS {?y ns:people.marriage.to []})\n\t}?x ns:government.politician.government_positions_held ?c .\n?c ns:government.government_position_held.from \"1934\"^^xsd:dateTime . \n}", 
        "compositionality_type": "conjunction", 
        "answers": [
            {
                "answer": "Joseph P. Kennedy, Sr.", 
                "answer_id": "m.01qlg1", 
                "aliases": [
                    "Joseph Patrick Kennedy, Sr.", 
                    "Joseph P. Kennedy", 
                    "Joseph Kennedy, Sr.", 
                    "Joseph Kennedy Sr.", 
                    "Joe Kennedy, Sr", 
                    "Joseph Patrick \"Joe\" Kennedy, Sr.", 
                    "Joseph Patrick Kennedy"
                ]
            }
        ], 
        "created": "2018-02-13T04:12:02"
    }, 
    {
        "ID": "WebQTrn-2333_7bc37f5ea0bc419b7ee5510daff240df", 
        "webqsp_ID": "WebQTrn-2333", 
        "webqsp_question": "when did the boston celtics win their first championship", 
        "machine_question": "when did the the team won the 1974 NBA Finals championship win their first championship", 
        "question": "When did the sports team that won the 1974 NBA Finals championship win their first championship?", 
        "sparql": "PREFIX ns: <http://rdf.freebase.com/ns/>\nSELECT DISTINCT ?x\nWHERE {\nFILTER (?x != ?c)\nFILTER (!isLiteral(?x) OR lang(?x) = '' OR langMatches(lang(?x), 'en'))\n?c ns:sports.sports_team.championships ns:m.0cs1gb . \n?c ns:sports.sports_team.championships ?x .\n?x ns:time.event.start_date ?sk0 .\n}\nORDER BY xsd:datetime(?sk0)\nLIMIT 1\n", 
        "compositionality_type": "composition", 
        "answers": [
            {
                "answer": "1957 NBA Finals", 
                "answer_id": "m.0cs2n0", 
                "aliases": [
                    "1957 NBA World Championship Series"
                ]
            }
        ], 
        "created": "2018-02-12T23:46:46"
    }, 
    {
        "ID": "WebQTrn-2591_9f8fc8341d7c53fe16d94a6a23638ec4", 
        "webqsp_ID": "WebQTrn-2591", 
        "webqsp_question": "who are china 's trading partners", 
        "machine_question": "who are china 's trading partners and the currency used in the country is Malagasy ariary", 
        "question": "What country using the Malagasy Ariary currency is China's trading partner?", 
        "sparql": "#MANUAL SPARQL\nPREFIX ns: <http://rdf.freebase.com/ns/>\nSELECT DISTINCT ?x \nWHERE {\n\tFILTER (?x != ns:m.0d05w3)\n\t{ \n\t  ns:m.0d05w3 ns:location.statistical_region.places_exported_to ?y .\n\t  ?y ns:location.imports_and_exports.exported_to ?x . \n\t}\n\tUNION\n\t{\n\t  ns:m.0d05w3 ns:location.statistical_region.places_imported_from ?y .\n\t  ?y ns:location.imports_and_exports.imported_from ?x . \n\t}?x ns:location.country.currency_used ns:m.04hx_7 . \n}", 
        "compositionality_type": "conjunction", 
        "answers": [
            {
                "answer": "Madagascar", 
                "answer_id": "m.04sj3", 
                "aliases": [
                    "Republic of Madagascar", 
                    "Malagasy Republic"
                ]
            }
        ], 
        "created": "2018-02-13T00:17:15"
    }, 
    {
        "ID": "WebQTest-983_ccda690fb745939d0a62c3fbcf3e3769", 
        "webqsp_ID": "WebQTest-983", 
        "webqsp_question": "where did tennessee williams go to college", 
        "machine_question": "where did tennessee williams go to college and the educational institution newspaper is The Maneater", 
        "question": "Where did Tennessee Williams go to college where the newspaper is \"The Maneater\"?", 
        "sparql": "PREFIX ns: <http://rdf.freebase.com/ns/>\nSELECT DISTINCT ?x\nWHERE {\nFILTER (?x != ns:m.0c4y8)\nFILTER (!isLiteral(?x) OR lang(?x) = '' OR langMatches(lang(?x), 'en'))\nns:m.0c4y8 ns:people.person.education ?y .\n?y ns:education.education.institution ?x .\n?x ns:common.topic.notable_types ns:m.01y2hnl .\n?x ns:education.educational_institution.newspaper ns:m.04pk3f . \n}", 
        "compositionality_type": "conjunction", 
        "answers": [
            {
                "answer": "University of Missouri", 
                "answer_id": "m.0187nd", 
                "aliases": [
                    "MU", 
                    "Mizzou", 
                    "University of Missouri\u2013Columbia", 
                    "University of Missouri-Columbia", 
                    "University of Missouri\u2013Columbia, main campus"
                ]
            }
        ], 
        "created": "2018-02-13T04:29:58"
    }, 
    {
        "ID": "WebQTrn-860_02bcf2def8fd43213ec01b3c1396b6b9", 
        "webqsp_ID": "WebQTrn-860", 
        "webqsp_question": "what other cars does gm make", 
        "machine_question": "what other cars does the organiztion leadership has a person named Carl-Peter Forster make", 
        "question": "What cars are made my the company who has a leader named Carl-Peter Forster?", 
        "sparql": "PREFIX ns: <http://rdf.freebase.com/ns/>\nSELECT DISTINCT ?x\nWHERE {\nFILTER (?x != ?c)\nFILTER (!isLiteral(?x) OR lang(?x) = '' OR langMatches(lang(?x), 'en'))\n?c ns:organization.organization.leadership ?k .\n?k ns:organization.leadership.person ns:m.0g2003 . \n?c ns:automotive.company.make_s ?x .\n?x ns:common.topic.notable_types ns:m.02ht342 .\n}\n", 
        "compositionality_type": "composition", 
        "answers": [
            {
                "answer": "GM Korea", 
                "answer_id": "m.0_knrlq", 
                "aliases": []
            }, 
            {
                "answer": "Geo", 
                "answer_id": "m.02_ty_", 
                "aliases": []
            }, 
            {
                "answer": "LaSalle", 
                "answer_id": "m.02mz1s", 
                "aliases": [
                    "La Salle"
                ]
            }, 
            {
                "answer": "Acadian", 
                "answer_id": "m.03h0wb", 
                "aliases": []
            }, 
            {
                "answer": "Hummer", 
                "answer_id": "m.03qyv", 
                "aliases": []
            }, 
            {
                "answer": "Oakland Motor Car Company", 
                "answer_id": "m.056d3_", 
                "aliases": []
            }, 
            {
                "answer": "GM PUMA", 
                "answer_id": "m.05pv27x", 
                "aliases": [
                    "GM Segway", 
                    "PUMA", 
                    "P.U.M.A."
                ]
            }, 
            {
                "answer": "Buick", 
                "answer_id": "m.0blvz", 
                "aliases": []
            }, 
            {
                "answer": "Oldsmobile", 
                "answer_id": "m.0dppm", 
                "aliases": []
            }, 
            {
                "answer": "Holden", 
                "answer_id": "m.0h734p8", 
                "aliases": []
            }, 
            {
                "answer": "Vauxhall", 
                "answer_id": "m.0j68wwy", 
                "aliases": []
            }, 
            {
                "answer": "HSV", 
                "answer_id": "m.0j6nb27", 
                "aliases": []
            }, 
            {
                "answer": "General Motors", 
                "answer_id": "m.0j726ql", 
                "aliases": []
            }, 
            {
                "answer": "GMC", 
                "answer_id": "m.0j72pxm", 
                "aliases": []
            }, 
            {
                "answer": "Pontiac", 
                "answer_id": "m.0xmf42g", 
                "aliases": []
            }, 
            {
                "answer": "Terex", 
                "answer_id": "m.0xmqcwb", 
                "aliases": []
            }
        ], 
        "created": "2018-02-12T21:14:19"
    }, 
    {
        "ID": "WebQTest-107_550f6a0ca850b4998124070c299ff048", 
        "webqsp_ID": "WebQTest-107", 
        "webqsp_question": "what was thomas jefferson role in the declaration of independence", 
        "machine_question": "what was the architect that desinged Charlotte County Courthouse role in the declaration of independence", 
        "question": "What role in the Declaration of Independence did the architect that designed Charlotte Country Courthouse play?", 
        "sparql": "PREFIX ns: <http://rdf.freebase.com/ns/>\nSELECT DISTINCT ?x\nWHERE {\nFILTER (?x != ?c)\nFILTER (!isLiteral(?x) OR lang(?x) = '' OR langMatches(lang(?x), 'en'))\n?c ns:architecture.architect.structures_designed ns:m.06_d_fx . \n?c ns:people.person.profession ?x .\n}\n", 
        "compositionality_type": "composition", 
        "answers": [
            {
                "answer": "Statesman", 
                "answer_id": "m.016fc2", 
                "aliases": []
            }, 
            {
                "answer": "Teacher", 
                "answer_id": "m.01d30f", 
                "aliases": []
            }, 
            {
                "answer": "Philosopher", 
                "answer_id": "m.02h6fbs", 
                "aliases": []
            }, 
            {
                "answer": "Archaeologist", 
                "answer_id": "m.02h6pd1", 
                "aliases": [
                    "Archeologist"
                ]
            }, 
            {
                "answer": "Inventor", 
                "answer_id": "m.03sbb", 
                "aliases": []
            }, 
            {
                "answer": "Lawyer", 
                "answer_id": "m.04gc2", 
                "aliases": [
                    "international lawyer", 
                    "Barrister", 
                    "Attorney", 
                    "Counsel", 
                    "Solicitor"
                ]
            }, 
            {
                "answer": "Writer", 
                "answer_id": "m.0cbd2", 
                "aliases": [
                    "Scribe", 
                    "Author"
                ]
            }, 
            {
                "answer": "Farmer", 
                "answer_id": "m.0g0vx", 
                "aliases": []
            }, 
            {
                "answer": "Author", 
                "answer_id": "m.0kyk", 
                "aliases": [
                    "Writer"
                ]
            }, 
            {
                "answer": "Architect", 
                "answer_id": "m.0mn6", 
                "aliases": []
            }
        ], 
        "created": "2018-02-13T02:46:49"
    }, 
    {
        "ID": "WebQTrn-2505_ac82b6d5645072d4ce73abb6e57a55d5", 
        "webqsp_ID": "WebQTrn-2505", 
        "webqsp_question": "what is vanderbilt university mascot", 
        "machine_question": "what is the education institution has a grad student named Thomas R. Ford mascot", 
        "question": "What is the mascot of the school where Thomas R. Ford is a grad student?", 
        "sparql": "PREFIX ns: <http://rdf.freebase.com/ns/>\nSELECT DISTINCT ?x\nWHERE {\nFILTER (?x != ?c)\nFILTER (!isLiteral(?x) OR lang(?x) = '' OR langMatches(lang(?x), 'en'))\n?c ns:education.educational_institution.students_graduates ?k .\n?k ns:education.education.student ns:m.0_thgpt . \n?c ns:education.educational_institution.mascot ?x .\n}\n", 
        "compositionality_type": "composition", 
        "answers": [
            {
                "answer": "Vanderbilt University Mr. Commodore", 
                "answer_id": "m.05k6hxh", 
                "aliases": []
            }
        ], 
        "created": "2018-02-13T00:03:35"
    }, 
    {
        "ID": "WebQTrn-1251_85f381b8012b4def553954906bc9fafb", 
        "webqsp_ID": "WebQTrn-1251", 
        "webqsp_question": "what language people speak in belgium", 
        "machine_question": "what language people speak in the country capital is City of Brussels", 
        "question": "What language is spoken where the capital city is Brussels?", 
        "sparql": "PREFIX ns: <http://rdf.freebase.com/ns/>\nSELECT DISTINCT ?x\nWHERE {\nFILTER (?x != ?c)\nFILTER (!isLiteral(?x) OR lang(?x) = '' OR langMatches(lang(?x), 'en'))\n?c ns:location.country.capital ns:m.02rnbv . \n?c ns:location.country.languages_spoken ?x .\n}\n", 
        "compositionality_type": "composition", 
        "answers": [
            {
                "answer": "Dutch Language", 
                "answer_id": "m.02bv9", 
                "aliases": [
                    "Nederlandse taal", 
                    "Nederlands", 
                    "Hollands", 
                    "Dutch"
                ]
            }, 
            {
                "answer": "Picard Language", 
                "answer_id": "m.02drlb", 
                "aliases": [
                    "Picard", 
                    "Chtimi", 
                    "Rouchi"
                ]
            }, 
            {
                "answer": "West Flemish", 
                "answer_id": "m.02y3v", 
                "aliases": [
                    "Vlams", 
                    "West-Vlaams", 
                    "West-Vlams"
                ]
            }, 
            {
                "answer": "German Language", 
                "answer_id": "m.04306rv", 
                "aliases": [
                    "German, Standard Language", 
                    "Deutsch", 
                    "German", 
                    "Tedesco", 
                    "High German", 
                    "Hochdeutsch", 
                    "German, Standard"
                ]
            }, 
            {
                "answer": "French", 
                "answer_id": "m.064_8sq", 
                "aliases": [
                    "Francais", 
                    "Fran\u00e7ais", 
                    "French", 
                    "French language"
                ]
            }
        ], 
        "created": "2018-02-12T21:57:52"
    }, 
    {
        "ID": "WebQTrn-1697_4db86e7e5f08a2789e93d4394a222fd6", 
        "webqsp_ID": "WebQTrn-1697", 
        "webqsp_question": "where is puerto galera", 
        "machine_question": "where is puerto galera and is the country that contains Baguio", 
        "question": "What country is home to both Baguio and Puerto Galera?", 
        "sparql": "PREFIX ns: <http://rdf.freebase.com/ns/>\nSELECT DISTINCT ?x\nWHERE {\nFILTER (?x != ns:m.01pn1_)\nFILTER (!isLiteral(?x) OR lang(?x) = '' OR langMatches(lang(?x), 'en'))\nns:m.01pn1_ ns:location.location.containedby ?x .\n?x ns:location.country.administrative_divisions ns:m.015l1_ . \n}", 
        "compositionality_type": "conjunction", 
        "answers": [
            {
                "answer": "Philippines", 
                "answer_id": "m.05v8c", 
                "aliases": [
                    "Republika ng Pilipinas", 
                    "The Philippines", 
                    "Republic of the Philippines", 
                    "philippines", 
                    "\ud544\ub9ac\ud540 \uacf5\ud654\uad6d", 
                    "\u30d5\u30a3\u30ea\u30d4\u30f3\u5171\u548c\u56fd", 
                    "Pearl of the Orient Seas", 
                    "Philippiness"
                ]
            }
        ], 
        "created": "2018-02-12T22:43:24"
    }, 
    {
        "ID": "WebQTrn-1827_84e5ab7013a2c0dd11f7f61db45df94c", 
        "webqsp_ID": "WebQTrn-1827", 
        "webqsp_question": "what is the local currency in the dominican republic", 
        "machine_question": "what is the local currency in the the country that contains San Pedro de Macor\u00c3\u00ads Province", 
        "question": "What currency is used in the country with San Pedo de Marocris Province?", 
        "sparql": "PREFIX ns: <http://rdf.freebase.com/ns/>\nSELECT DISTINCT ?x\nWHERE {\nFILTER (?x != ?c)\nFILTER (!isLiteral(?x) OR lang(?x) = '' OR langMatches(lang(?x), 'en'))\n?c ns:location.country.administrative_divisions ns:m.03xyyk . \n?c ns:location.country.currency_used ?x .\n}\n", 
        "compositionality_type": "composition", 
        "answers": [
            {
                "answer": "Dominican peso", 
                "answer_id": "m.04lt7_", 
                "aliases": []
            }
        ], 
        "created": "2018-02-12T22:54:31"
    }, 
    {
        "ID": "WebQTrn-1770_8db36acba886620a06031d39165d78de", 
        "webqsp_ID": "WebQTrn-1770", 
        "webqsp_question": "what is beyonce 's daughters name", 
        "machine_question": "what is the artist had a concert tour named I Am... World Tour 's daughters name", 
        "question": "Who is the daughter of the artist who had a concert tour called I Am... World Tour?", 
        "sparql": "PREFIX ns: <http://rdf.freebase.com/ns/>\nSELECT DISTINCT ?x\nWHERE {\nFILTER (?x != ?c)\nFILTER (!isLiteral(?x) OR lang(?x) = '' OR langMatches(lang(?x), 'en'))\n?c ns:music.artist.concert_tours ns:m.05200my . \n?c ns:people.person.children ?x .\n}\n", 
        "compositionality_type": "composition", 
        "answers": [
            {
                "answer": "Blue Ivy", 
                "answer_id": "m.0hvsrmc", 
                "aliases": [
                    "Blue Ivy Carter"
                ]
            }
        ], 
        "created": "2018-02-12T22:48:28"
    }, 
    {
        "ID": "WebQTest-1850_348ffb5f977515416413969a002055e0", 
        "webqsp_ID": "WebQTest-1850", 
        "webqsp_question": "what religion does madonna practice", 
        "machine_question": "what religion does the artist had a concert tour named The Girlie Show World Tour practice", 
        "question": "What religions does the artist who went on The Girlie Show World Tour follow?", 
        "sparql": "PREFIX ns: <http://rdf.freebase.com/ns/>\nSELECT DISTINCT ?x\nWHERE {\nFILTER (?x != ?c)\nFILTER (!isLiteral(?x) OR lang(?x) = '' OR langMatches(lang(?x), 'en'))\n?c ns:music.artist.concert_tours ns:m.08c8b5 . \n?c ns:people.person.religion ?x .\n}\n", 
        "compositionality_type": "composition", 
        "answers": [
            {
                "answer": "Jewish Renewal", 
                "answer_id": "m.01n15n", 
                "aliases": []
            }, 
            {
                "answer": "Catholicism", 
                "answer_id": "m.0c8wxp", 
                "aliases": [
                    "Roman Catholic convert", 
                    "Roman Catholic"
                ]
            }
        ], 
        "created": "2018-02-13T06:11:23"
    }, 
    {
        "ID": "WebQTest-153_258209657aad22d6f5f3af94b8dd6bc5", 
        "webqsp_ID": "WebQTest-153", 
        "webqsp_question": "what are the sights to see in madrid", 
        "machine_question": "what are the sights to see in madrid and is the structure construction started in latest", 
        "question": "Which sights are their to see in Madrid, where the structure was construction started the latest?", 
        "sparql": "PREFIX ns: <http://rdf.freebase.com/ns/>\nSELECT DISTINCT ?x\nWHERE {\nFILTER (?x != ns:m.056_y)\nFILTER (!isLiteral(?x) OR lang(?x) = '' OR langMatches(lang(?x), 'en'))\nns:m.056_y ns:travel.travel_destination.tourist_attractions ?x .\n?x ns:architecture.structure.construction_started ?num .\n}\nORDER BY DESC(?num) LIMIT 1", 
        "compositionality_type": "superlative", 
        "answers": [
            {
                "answer": "Royal Palace of Madrid", 
                "answer_id": "m.04m3yk", 
                "aliases": [
                    "The Royal Palace of Madrid"
                ]
            }
        ], 
        "created": "2018-02-13T02:50:35"
    }, 
    {
        "ID": "WebQTrn-1817_89670933168c3f4e5195a241f9d46e76", 
        "webqsp_ID": "WebQTrn-1817", 
        "webqsp_question": "what type of government does vietnam have today", 
        "machine_question": "what type of government does the country that has the national anthem Ti\u00e1\u00ba\u00bfn Qu\u00c3\u00a2n Ca have today", 
        "question": "What are the governmental types in the country whose national anthem is Tien Quan Ca?", 
        "sparql": "PREFIX ns: <http://rdf.freebase.com/ns/>\nSELECT DISTINCT ?x\nWHERE {\nFILTER (?x != ?c)\nFILTER (!isLiteral(?x) OR lang(?x) = '' OR langMatches(lang(?x), 'en'))\n?c ns:location.country.national_anthem ?k .\n?k ns:government.national_anthem_of_a_country.anthem ns:m.01kvf8 . \n?c ns:location.country.form_of_government ?x .\n}\n", 
        "compositionality_type": "composition", 
        "answers": [
            {
                "answer": "Communist state", 
                "answer_id": "m.01fkst", 
                "aliases": [
                    "Communist"
                ]
            }, 
            {
                "answer": "Socialist state", 
                "answer_id": "m.025tbxf", 
                "aliases": [
                    "Socialist", 
                    "Socialist Republic"
                ]
            }, 
            {
                "answer": "Single-party state", 
                "answer_id": "m.0py4y", 
                "aliases": [
                    "Single-party"
                ]
            }
        ], 
        "created": "2018-02-12T22:53:47"
    }, 
    {
        "ID": "WebQTrn-2397_4a9e228bead735d7ac2f42af34394d57", 
        "webqsp_ID": "WebQTrn-2397", 
        "webqsp_question": "what year did arizona diamondbacks win the world series", 
        "machine_question": "what year did the sports team owner is Ken Kendrick win the world series", 
        "question": "In what year did team owner Ken Kendrick's sports team with the World Series?", 
        "sparql": "PREFIX ns: <http://rdf.freebase.com/ns/>\nSELECT DISTINCT ?x\nWHERE {\nFILTER (?x != ?c)\nFILTER (!isLiteral(?x) OR lang(?x) = '' OR langMatches(lang(?x), 'en'))\n?c ns:sports.professional_sports_team.owner_s ns:m.0d_khh . \n?c ns:sports.sports_team.championships ?x .\n}\n", 
        "compositionality_type": "composition", 
        "answers": [
            {
                "answer": "2001 World Series", 
                "answer_id": "m.018my", 
                "aliases": [
                    "2001 World"
                ]
            }
        ], 
        "created": "2018-02-12T23:51:54"
    }, 
    {
        "ID": "WebQTrn-849_1eb0f1ddd5074471fbe3a7f6b575f202", 
        "webqsp_ID": "WebQTrn-849", 
        "webqsp_question": "which countries do germany border", 
        "machine_question": "which countries do germany border and the country capital is Copenhagen", 
        "question": "Copenhagen is the capital of which German neighboring country?", 
        "sparql": "PREFIX ns: <http://rdf.freebase.com/ns/>\nSELECT DISTINCT ?x\nWHERE {\nFILTER (?x != ns:m.0345h)\nFILTER (!isLiteral(?x) OR lang(?x) = '' OR langMatches(lang(?x), 'en'))\nns:m.0345h ns:location.location.adjoin_s ?y .\n?y ns:location.adjoining_relationship.adjoins ?x .\n?x ns:common.topic.notable_types ns:m.01mp .\n?x ns:location.country.capital ns:m.01lfy . \n}", 
        "compositionality_type": "conjunction", 
        "answers": [
            {
                "answer": "Denmark", 
                "answer_id": "m.0k6nt", 
                "aliases": [
                    "D\u00e4nemark", 
                    "Kingdom of Denmark", 
                    "Kongeriget Danmark", 
                    "\u4e39\u9ea6"
                ]
            }
        ], 
        "created": "2018-02-12T21:13:45"
    }, 
    {
        "ID": "WebQTest-388_5664110c14c11cbfe165fc3cd86c8845", 
        "webqsp_ID": "WebQTest-388", 
        "webqsp_question": "what are the important holidays of islam", 
        "machine_question": "what are the important holidays of the religion types of places of worship include Masjid Hamza, Valley Stream", 
        "question": "Which holidays are the important ones in the religion with places of worship Masjid Hamza and Valley Stream?", 
        "sparql": "PREFIX ns: <http://rdf.freebase.com/ns/>\nSELECT DISTINCT ?x\nWHERE {\nFILTER (?x != ?c)\nFILTER (!isLiteral(?x) OR lang(?x) = '' OR langMatches(lang(?x), 'en'))\n?c ns:religion.religion.types_of_places_of_worship ns:m.0pc5qwj . \n?c ns:religion.religion.holidays ?x .\n}\n", 
        "compositionality_type": "composition", 
        "answers": [
            {
                "answer": "Eid al-Fitr Eve", 
                "answer_id": "m.0_tkhhs", 
                "aliases": []
            }, 
            {
                "answer": "Eid-Ul-Adha Eve", 
                "answer_id": "m.0_tkryk", 
                "aliases": []
            }, 
            {
                "answer": "Eid al-Adha", 
                "answer_id": "m.01_403", 
                "aliases": [
                    "bakra eid", 
                    "Greater Eid", 
                    "eid al adha", 
                    "bakr-id", 
                    "Eid ul-adha", 
                    "id eladha", 
                    "3ed el adha", 
                    "eid aladha", 
                    "Eid-al-adha", 
                    "Id el adha", 
                    "3eed el adha", 
                    "id uladha", 
                    "3id el adha", 
                    "The Festival of Sacrifice", 
                    "Kurban Bayram\u0131", 
                    "3eed eladha", 
                    "eid el adha", 
                    "3ed eladha", 
                    "3ed elad7a", 
                    "3eed elad7a", 
                    "eid adha", 
                    "Sacrifice Feast", 
                    "3eed el ad7a", 
                    "3id elad7a", 
                    "3ed el ad7a", 
                    "eid ul adha", 
                    "Feast of Sacrifice", 
                    "eid eladha", 
                    "id aladha", 
                    "Festival of Sacrifice", 
                    "id al adha", 
                    "3id eladha", 
                    "3id el ad7a", 
                    "Id-ul-adha", 
                    "Id al-adha", 
                    "id ul adha", 
                    "eid uladha", 
                    "bakrid", 
                    "bakrid eid", 
                    "Eid el-adha"
                ]
            }, 
            {
                "answer": "Lailat al Mi'raj", 
                "answer_id": "m.0114y4k_", 
                "aliases": []
            }, 
            {
                "answer": "Nuzul Al-Quran", 
                "answer_id": "m.011njw8h", 
                "aliases": []
            }, 
            {
                "answer": "Eid al-Fitr", 
                "answer_id": "m.0148n3", 
                "aliases": [
                    "3ed elfitr", 
                    "eid alfitr", 
                    "3ed el fitr", 
                    "3id elfiter", 
                    "3id elfitr", 
                    "eid ul fitr", 
                    "id elfitr", 
                    "id al fiter", 
                    "eid al fitr", 
                    "id ul fiter", 
                    "eid ulfiter", 
                    "id alfitr", 
                    "3eed el fiter", 
                    "3eed elfitr", 
                    "id elfiter", 
                    "eid ulfitr", 
                    "Eid-al-Fitr", 
                    "eid al fiter", 
                    "Id al-Fitr", 
                    "eid fitr", 
                    "Id-ul-Fitr", 
                    "id alfiter", 
                    "id el fiter", 
                    "eid elfiter", 
                    "3eed elfiter", 
                    "3id el fitr", 
                    "id ulfiter", 
                    "Eid ul-Fitr", 
                    "eid el fitr", 
                    "3id el fiter", 
                    "3ed el fiter", 
                    "eid alfiter", 
                    "\u012adu l-Fi\u1e6dr", 
                    "eid ul fiter", 
                    "3ed elfiter", 
                    "3eed el fitr", 
                    "eid", 
                    "Hari Raya Aidilfitri", 
                    "eid el fiter", 
                    "id ulfitr"
                ]
            }, 
            {
                "answer": "Day of Arafat", 
                "answer_id": "m.027cs49", 
                "aliases": [
                    "Day of Arafa", 
                    "Arafa day", 
                    "Arafat day"
                ]
            }, 
            {
                "answer": "Day of Ashura", 
                "answer_id": "m.02gk03", 
                "aliases": []
            }, 
            {
                "answer": "Mourning of Muharram", 
                "answer_id": "m.03clhwf", 
                "aliases": []
            }, 
            {
                "answer": "Laylat al-Qadr", 
                "answer_id": "m.04b4l4", 
                "aliases": [
                    "Shab-e-Qadr"
                ]
            }, 
            {
                "answer": "Barat Night", 
                "answer_id": "m.04jc26j", 
                "aliases": []
            }, 
            {
                "answer": "Mawlid", 
                "answer_id": "m.04q3_d", 
                "aliases": [
                    "mawlid al-nabi", 
                    "Prophet's Birthday", 
                    "m\u012bl\u0101d", 
                    "milad un-nabi", 
                    "mawlid al nabi", 
                    "mulud", 
                    "Mevlid", 
                    "Eid Milad ul-Nabi", 
                    "Milad-un-Nabi", 
                    "Mevlit"
                ]
            }, 
            {
                "answer": "Ramadan", 
                "answer_id": "m.06j8x", 
                "aliases": [
                    "Rama\u1e0d\u0101n", 
                    "ramazan"
                ]
            }, 
            {
                "answer": "Islamic New Year", 
                "answer_id": "m.07_46x", 
                "aliases": [
                    "Muslim New Year"
                ]
            }, 
            {
                "answer": "Night of Wishes", 
                "answer_id": "m.0vpsp_r", 
                "aliases": [
                    "Laylat Al-ragha'ib"
                ]
            }
        ], 
        "created": "2018-02-13T03:24:56"
    }, 
    {
        "ID": "WebQTest-811_22a085e4a873315a9c2e63361cbd9248", 
        "webqsp_ID": "WebQTest-811", 
        "webqsp_question": "where is the phillies spring training stadium", 
        "machine_question": "where is the the team has a team moscot named Phillie Phanatic spring training stadium", 
        "question": "Where is mascot Phillie Phanatic's team's spring training stadium located?", 
        "sparql": "PREFIX ns: <http://rdf.freebase.com/ns/>\nSELECT DISTINCT ?x\nWHERE {\nFILTER (?x != ?c)\nFILTER (!isLiteral(?x) OR lang(?x) = '' OR langMatches(lang(?x), 'en'))\n?c ns:sports.sports_team.team_mascot ns:m.035sw4 . \n?c ns:base.schemastaging.sports_team_extra.training_ground ?y .\n?y ns:base.schemastaging.team_training_ground_relationship.facility ?x .\n}\n", 
        "compositionality_type": "composition", 
        "answers": [
            {
                "answer": "Bright House Field", 
                "answer_id": "m.066c5m", 
                "aliases": []
            }
        ], 
        "created": "2018-02-13T04:11:56"
    }, 
    {
        "ID": "WebQTrn-1895_b29f05247d8bace580362572c5c491c0", 
        "webqsp_ID": "WebQTrn-1895", 
        "webqsp_question": "what did maria theresa rule", 
        "machine_question": "what did maria theresa rule and the currency used in the country is Hungarian forint", 
        "question": "Which country that uses the Hungarian forint did Maria Theresa rule?", 
        "sparql": "PREFIX ns: <http://rdf.freebase.com/ns/>\nSELECT DISTINCT ?x\nWHERE {\nFILTER (?x != ns:m.0czh6)\nFILTER (!isLiteral(?x) OR lang(?x) = '' OR langMatches(lang(?x), 'en'))\nns:m.0czh6 ns:royalty.monarch.kingdom ?x .\n?x ns:location.country.currency_used ns:m.01hfll . \n}", 
        "compositionality_type": "conjunction", 
        "answers": [
            {
                "answer": "Hungary", 
                "answer_id": "m.03gj2", 
                "aliases": [
                    "Magyarorsz\u00e1g", 
                    "Hungary, Europe"
                ]
            }
        ], 
        "created": "2018-02-12T23:02:53"
    }, 
    {
        "ID": "WebQTrn-1169_0c1199aeda4781e3a9713a488e7c4fd0", 
        "webqsp_ID": "WebQTrn-1169", 
        "webqsp_question": "where is the country of panama located", 
        "machine_question": "where is the the country capital is Panama City located", 
        "question": "What continent does Panama City located in?", 
        "sparql": "PREFIX ns: <http://rdf.freebase.com/ns/>\nSELECT DISTINCT ?x\nWHERE {\nFILTER (?x != ?c)\nFILTER (!isLiteral(?x) OR lang(?x) = '' OR langMatches(lang(?x), 'en'))\n?c ns:location.country.capital ns:m.0fr_b . \n?c ns:base.locations.countries.continent ?x .\n}\n", 
        "compositionality_type": "composition", 
        "answers": [
            {
                "answer": "North America", 
                "answer_id": "m.059g4", 
                "aliases": []
            }
        ], 
        "created": "2018-02-12T21:50:07"
    }, 
    {
        "ID": "WebQTrn-2152_92fba37c9723caee68665ad9a5e4a468", 
        "webqsp_ID": "WebQTrn-2152", 
        "webqsp_question": "what teams are in the american league west", 
        "machine_question": "what teams are in the american league west and the sports team owner is Tom Hicks", 
        "question": "Which of team owners Tom Hicks sports team are in the American League West?", 
        "sparql": "PREFIX ns: <http://rdf.freebase.com/ns/>\nSELECT DISTINCT ?x\nWHERE {\nFILTER (?x != ns:m.07fbnf)\nFILTER (!isLiteral(?x) OR lang(?x) = '' OR langMatches(lang(?x), 'en'))\nns:m.07fbnf ns:sports.sports_league.teams ?y .\n?y ns:sports.sports_league_participation.team ?x .\n?x ns:sports.professional_sports_team.owner_s ns:m.02kmcb . \n}", 
        "compositionality_type": "conjunction", 
        "answers": [
            {
                "answer": "Texas Rangers", 
                "answer_id": "m.07l8x", 
                "aliases": [
                    "The Blue Crew"
                ]
            }
        ], 
        "created": "2018-02-12T23:29:58"
    }, 
    {
        "ID": "WebQTest-257_cc9c3762c3270d53c3fe668c638ff65b", 
        "webqsp_ID": "WebQTest-257", 
        "webqsp_question": "who was the soviet leader during world war ii", 
        "machine_question": "who was the soviet leader during world war ii and held his govermental position from after 1953-09-14", 
        "question": "Who was the Soviet Leader during WWII that held his governmental position after September 14, 1953?", 
        "sparql": "PREFIX ns: <http://rdf.freebase.com/ns/>\nSELECT DISTINCT ?x\nWHERE {\nFILTER (?x != ns:m.05vz3zq)\nFILTER (!isLiteral(?x) OR lang(?x) = '' OR langMatches(lang(?x), 'en'))\nns:m.05vz3zq ns:government.governmental_jurisdiction.governing_officials ?y .\n?y ns:government.government_position_held.office_holder ?x .\n?x ns:military.military_person.participated_in_conflicts ns:m.081pw .\n?x ns:government.politician.government_positions_held ?c .\n?c ns:government.government_position_held.from ?num .\nFILTER (?num > \"1953-09-14\"^^xsd:dateTime) . \n}", 
        "compositionality_type": "comparative", 
        "answers": [
            {
                "answer": "Leonid Brezhnev", 
                "answer_id": "m.0d8xy", 
                "aliases": [
                    "Leonid Il\u02b9ich Brezhnev", 
                    "Leonid Ilyich Brezhnev", 
                    "Leonid Ilich Brezhnev"
                ]
            }
        ], 
        "created": "2018-02-13T03:06:46"
    }, 
    {
        "ID": "WebQTrn-2920_6e601bc7f08802b0177cd0f392e9f5d2", 
        "webqsp_ID": "WebQTrn-2920", 
        "webqsp_question": "where does frida kahlo live now", 
        "machine_question": "where does frida kahlo live now and is the tv show Porque el amor manda was filmed there", 
        "question": "Where was the tv program Porque el amor manda recorded and is now the place of residence of Frida Kahlo?", 
        "sparql": "PREFIX ns: <http://rdf.freebase.com/ns/>\nSELECT DISTINCT ?x\nWHERE {\nFILTER (?x != ns:m.015k04)\nFILTER (!isLiteral(?x) OR lang(?x) = '' OR langMatches(lang(?x), 'en'))\nns:m.015k04 ns:people.person.places_lived ?y .\n?y ns:people.place_lived.location ?x .\nFILTER(NOT EXISTS {?y ns:people.place_lived.end_date ?sk0} || \nEXISTS {?y ns:people.place_lived.end_date ?sk1 . \nFILTER(xsd:datetime(?sk1) >= \"2015-08-10\"^^xsd:dateTime) })\nFILTER(NOT EXISTS {?y ns:people.place_lived.start_date ?sk2} || \nEXISTS {?y ns:people.place_lived.start_date ?sk3 . \nFILTER(xsd:datetime(?sk3) <= \"2015-08-10\"^^xsd:dateTime) })\n?x ns:tv.tv_location.tv_shows_filmed_here ns:m.0lqfswc . \n}", 
        "compositionality_type": "conjunction", 
        "answers": [
            {
                "answer": "Mexico City", 
                "answer_id": "m.04sqj", 
                "aliases": [
                    "La Ciudad de los Palacios", 
                    "Zona Metropolitana de la Ciudad de M\u00e9xico", 
                    "The Federal District", 
                    "Ciudad de M\u00e9xico", 
                    "Mexico", 
                    "DF", 
                    "M\u00e9xico, D.F.", 
                    "D.F.", 
                    "Mexico City Metropolitan Zone", 
                    "Distritofederal", 
                    "Tenochtitl\u00e1n", 
                    "Mexican Federal District", 
                    "M\u00e9xico", 
                    "Zona Metropolitana del Valle de M\u00e9xico", 
                    "Metropolitan Area of the Valley of Mexico", 
                    "Ciudad De Mexico", 
                    "Distrito Federal", 
                    "Cidade do M\u00e9xico", 
                    "Greater Mexico City"
                ]
            }
        ], 
        "created": "2018-02-13T00:54:21"
    }, 
    {
        "ID": "WebQTest-1748_92b66ba137c13b471ddde58d372b12ae", 
        "webqsp_ID": "WebQTest-1748", 
        "webqsp_question": "through which countries of the sahel does the niger river flow", 
        "machine_question": "through which countries of the sahel does the niger river flow and the country capital is Abuja", 
        "question": "Abuja is capital of which country of the Sahel where the Niger River flows through?", 
        "sparql": "PREFIX ns: <http://rdf.freebase.com/ns/>\nSELECT DISTINCT ?x\nWHERE {\nFILTER (?x != ns:m.05csx)\nFILTER (!isLiteral(?x) OR lang(?x) = '' OR langMatches(lang(?x), 'en'))\nns:m.05csx ns:location.location.partially_containedby ?x .\n?x ns:common.topic.notable_types ns:m.01mp .\n?x ns:location.location.partially_contains ns:m.0l5_l .\n?x ns:location.country.capital ns:m.0fnxw . \n}", 
        "compositionality_type": "conjunction", 
        "answers": [
            {
                "answer": "Nigeria", 
                "answer_id": "m.05cgv", 
                "aliases": [
                    "Federal Republic of Nigeria"
                ]
            }
        ], 
        "created": "2018-02-13T05:53:36"
    }, 
    {
        "ID": "WebQTrn-399_645246b22bc2b0dcd7416f30d5d9417d", 
        "webqsp_ID": "WebQTrn-399", 
        "webqsp_question": "what is in liverpool england", 
        "machine_question": "what is in liverpool england and the location time zone is UTC\u00c2\u00b100:00", 
        "question": "What has a location time zone of UTC +-00:00 an dis part of Liverpool England?", 
        "sparql": "PREFIX ns: <http://rdf.freebase.com/ns/>\nSELECT DISTINCT ?x\nWHERE {\nFILTER (?x != ns:m.04lh6)\nFILTER (!isLiteral(?x) OR lang(?x) = '' OR langMatches(lang(?x), 'en'))\nns:m.04lh6 ns:travel.travel_destination.tourist_attractions ?x .\n?x ns:location.location.time_zones ns:m.0frmgl . \n}", 
        "compositionality_type": "conjunction", 
        "answers": [
            {
                "answer": "New Pleasureland Southport", 
                "answer_id": "m.06h8xk", 
                "aliases": [
                    "New Pleasureland", 
                    "Pleasureland"
                ]
            }
        ], 
        "created": "2018-02-12T20:21:11"
    }, 
    {
        "ID": "WebQTrn-1512_65952c606f7a7204cc1bec237c146bfa", 
        "webqsp_ID": "WebQTrn-1512", 
        "webqsp_question": "what currency should you take to thailand", 
        "machine_question": "what currency should you take to the country that contains Mae Hong Son Province", 
        "question": "Which type of currency would one be advised to bring if visiting that has Mae Hong Son Province within its borders?", 
        "sparql": "PREFIX ns: <http://rdf.freebase.com/ns/>\nSELECT DISTINCT ?x\nWHERE {\nFILTER (?x != ?c)\nFILTER (!isLiteral(?x) OR lang(?x) = '' OR langMatches(lang(?x), 'en'))\n?c ns:location.country.administrative_divisions ns:m.01jb47 . \n?c ns:location.country.currency_used ?x .\n}\n", 
        "compositionality_type": "composition", 
        "answers": [
            {
                "answer": "Thai baht", 
                "answer_id": "m.0mcb5", 
                "aliases": []
            }
        ], 
        "created": "2018-02-12T22:27:31"
    }, 
    {
        "ID": "WebQTrn-1548_993bf41507919333b3a87058c5072363", 
        "webqsp_ID": "WebQTrn-1548", 
        "webqsp_question": "what is the name of the pittsburgh steelers stadium", 
        "machine_question": "what is the name of the the sports team with the fight song Renegade stadium", 
        "question": "What is the home stadium of the sports team whose fight song is \"Renegade\"?", 
        "sparql": "PREFIX ns: <http://rdf.freebase.com/ns/>\nSELECT DISTINCT ?x\nWHERE {\nFILTER (?x != ?c)\nFILTER (!isLiteral(?x) OR lang(?x) = '' OR langMatches(lang(?x), 'en'))\n?c ns:sports.sports_team.fight_song ns:m.06c78r . \n?c ns:sports.sports_team.venue ?y .\n?y ns:sports.team_venue_relationship.venue ?x .\nFILTER(NOT EXISTS {?y ns:sports.team_venue_relationship.from ?sk0} || \nEXISTS {?y ns:sports.team_venue_relationship.from ?sk1 . \nFILTER(xsd:datetime(?sk1) <= \"2015-08-10\"^^xsd:dateTime) })\nFILTER(NOT EXISTS {?y ns:sports.team_venue_relationship.to ?sk2} || \nEXISTS {?y ns:sports.team_venue_relationship.to ?sk3 . \nFILTER(xsd:datetime(?sk3) >= \"2015-08-10\"^^xsd:dateTime) })\n}\n", 
        "compositionality_type": "composition", 
        "answers": [
            {
                "answer": "Heinz Field", 
                "answer_id": "m.02y4pw", 
                "aliases": [
                    "Heinz Field, Pittsburgh"
                ]
            }
        ], 
        "created": "2018-02-12T22:31:20"
    }, 
    {
        "ID": "WebQTrn-2327_d2fb25308e1871367a2ffcc8527989fa", 
        "webqsp_ID": "WebQTrn-2327", 
        "webqsp_question": "what are the different sports in the philippines", 
        "machine_question": "what are the different sports in the the country that contains Agusan del Sur", 
        "question": "Which sports are played in the nation where Agusan del Sur can be found?", 
        "sparql": "PREFIX ns: <http://rdf.freebase.com/ns/>\nSELECT DISTINCT ?x\nWHERE {\nFILTER (?x != ?c)\nFILTER (!isLiteral(?x) OR lang(?x) = '' OR langMatches(lang(?x), 'en'))\n?c ns:location.country.administrative_divisions ns:m.01nk2j . \n?c ns:sports.sports_team_location.teams ?x .\n}\n", 
        "compositionality_type": "composition", 
        "answers": [
            {
                "answer": "Philippines national football team", 
                "answer_id": "m.04k3r_", 
                "aliases": [
                    "Tri\u2013Stars", 
                    "RP XI", 
                    "Philippines national football", 
                    "PH/PHL XI", 
                    "RP Booters", 
                    "Philippine Azkals", 
                    "Azkals", 
                    "PH/PHL Booters"
                ]
            }, 
            {
                "answer": "Philippines men's national volleyball team", 
                "answer_id": "m.07k3_n0", 
                "aliases": [
                    "Philippines men's national volleyball"
                ]
            }, 
            {
                "answer": "Laos FC", 
                "answer_id": "m.0ll4ndn", 
                "aliases": []
            }
        ], 
        "created": "2018-02-12T23:46:22"
    }, 
    {
        "ID": "WebQTrn-2631_770d8b533fd2f564cf8401e6727b03f6", 
        "webqsp_ID": "WebQTrn-2631", 
        "webqsp_question": "what countries are the mediterranean", 
        "machine_question": "what countries are the mediterranean and is the country that contains Zonguldak Province", 
        "question": "What country in Mediterranean that has Zonguldak Province?", 
        "sparql": "PREFIX ns: <http://rdf.freebase.com/ns/>\nSELECT DISTINCT ?x\nWHERE {\nFILTER (?x != ns:m.04swx)\nFILTER (!isLiteral(?x) OR lang(?x) = '' OR langMatches(lang(?x), 'en'))\nns:m.04swx ns:location.location.adjoin_s ?y .\n?y ns:location.adjoining_relationship.adjoins ?x .\n?x ns:common.topic.notable_types ns:m.01mp .\n?x ns:location.country.administrative_divisions ns:m.01nbgn . \n}", 
        "compositionality_type": "conjunction", 
        "answers": [
            {
                "answer": "Turkey", 
                "answer_id": "m.01znc_", 
                "aliases": [
                    "Republic of Turkey", 
                    "T\u00fcrkiye", 
                    "Turkiye"
                ]
            }
        ], 
        "created": "2018-02-13T00:21:05"
    }, 
    {
        "ID": "WebQTrn-2028_f5f142961fbb986ee30dc0a419164821", 
        "webqsp_ID": "WebQTrn-2028", 
        "webqsp_question": "what money do they use in thailand", 
        "machine_question": "what money do they use in the country that has the national anthem Thai National Anthem", 
        "question": "What is the currency in the nation where Thai National Anthem is used as the national anthem?", 
        "sparql": "PREFIX ns: <http://rdf.freebase.com/ns/>\nSELECT DISTINCT ?x\nWHERE {\nFILTER (?x != ?c)\nFILTER (!isLiteral(?x) OR lang(?x) = '' OR langMatches(lang(?x), 'en'))\n?c ns:location.country.national_anthem ?k .\n?k ns:government.national_anthem_of_a_country.anthem ns:m.01b8l3 . \n?c ns:location.country.currency_used ?x .\n}\n", 
        "compositionality_type": "composition", 
        "answers": [
            {
                "answer": "Thai baht", 
                "answer_id": "m.0mcb5", 
                "aliases": []
            }
        ], 
        "created": "2018-02-12T23:17:22"
    }, 
    {
        "ID": "WebQTrn-498_7c9253b843680f5db5a4e5f5e1055f88", 
        "webqsp_ID": "WebQTrn-498", 
        "webqsp_question": "what are the most common religions in the united states", 
        "machine_question": "what are the most common religions in the united states and the religion text is Shulchan Aruch", 
        "question": "Which religion has a large practicing population in the US and has Sulchan Aruch as a part of their text?", 
        "sparql": "PREFIX ns: <http://rdf.freebase.com/ns/>\nSELECT DISTINCT ?x\nWHERE {\nFILTER (?x != ns:m.09c7w0)\nFILTER (!isLiteral(?x) OR lang(?x) = '' OR langMatches(lang(?x), 'en'))\nns:m.09c7w0 ns:location.statistical_region.religions ?y .\n?y ns:location.religion_percentage.religion ?x .\n?x ns:religion.religion.texts ns:m.0134k1 . \n}", 
        "compositionality_type": "conjunction", 
        "answers": [
            {
                "answer": "Judaism", 
                "answer_id": "m.03_gx", 
                "aliases": [
                    "Jewish"
                ]
            }
        ], 
        "created": "2018-02-12T20:37:33"
    }, 
    {
        "ID": "WebQTrn-1575_be64d515debe3029f7c0fb2af05bfe7e", 
        "webqsp_ID": "WebQTrn-1575", 
        "webqsp_question": "what religion is king henry viii", 
        "machine_question": "what religion is king henry viii and the religion belief is Virgin birth of Jesus", 
        "question": "Which religion believes that Jesus was born of a Virgin and was also King Henry VIII's religion?", 
        "sparql": "PREFIX ns: <http://rdf.freebase.com/ns/>\nSELECT DISTINCT ?x\nWHERE {\nFILTER (?x != ns:m.03p77)\nFILTER (!isLiteral(?x) OR lang(?x) = '' OR langMatches(lang(?x), 'en'))\nns:m.03p77 ns:people.person.religion ?x .\n?x ns:religion.religion.beliefs ns:m.012lvl . \n}", 
        "compositionality_type": "conjunction", 
        "answers": [
            {
                "answer": "Catholicism", 
                "answer_id": "m.0c8wxp", 
                "aliases": [
                    "Roman Catholic convert", 
                    "Roman Catholic"
                ]
            }
        ], 
        "created": "2018-02-12T22:33:14"
    }, 
    {
        "ID": "WebQTest-645_0db5dafcef666da2d314e42c8fbe8ecf", 
        "webqsp_ID": "WebQTest-645", 
        "webqsp_question": "what type of art did leonardo da vinci make", 
        "machine_question": "what type of art did the illustrator of the book De divina proportione make", 
        "question": "Which types of art were made by the person who illustrated the book De divina proportione?", 
        "sparql": "PREFIX ns: <http://rdf.freebase.com/ns/>\nSELECT DISTINCT ?x\nWHERE {\nFILTER (?x != ?c)\nFILTER (!isLiteral(?x) OR lang(?x) = '' OR langMatches(lang(?x), 'en'))\n?c ns:book.illustrator.books_illustrated ns:m.06pqb_7 . \n?c ns:visual_art.visual_artist.art_forms ?x .\n}\n", 
        "compositionality_type": "composition", 
        "answers": [
            {
                "answer": "Drawing", 
                "answer_id": "m.02csf", 
                "aliases": []
            }, 
            {
                "answer": "Painting", 
                "answer_id": "m.05qdh", 
                "aliases": []
            }, 
            {
                "answer": "Sculpture", 
                "answer_id": "m.06msq", 
                "aliases": []
            }
        ], 
        "created": "2018-02-13T03:54:26"
    }, 
    {
        "ID": "WebQTest-1067_902c457cc613104bf00220fc5dc5ff9b", 
        "webqsp_ID": "WebQTest-1067", 
        "webqsp_question": "what school did douglas macarthur go to", 
        "machine_question": "what school did douglas macarthur go to and is the education institution has a sports team named Army Black Knights men's basketball", 
        "question": "What school did Douglas Macarthur go to where the sports team was called the Army Black Knights?", 
        "sparql": "PREFIX ns: <http://rdf.freebase.com/ns/>\nSELECT DISTINCT ?x\nWHERE {\nFILTER (?x != ns:m.0c_jc)\nFILTER (!isLiteral(?x) OR lang(?x) = '' OR langMatches(lang(?x), 'en'))\nns:m.0c_jc ns:people.person.education ?y .\n?y ns:education.education.institution ?x .\n?x ns:education.educational_institution.sports_teams ns:m.02qbl9j . \n}", 
        "compositionality_type": "conjunction", 
        "answers": [
            {
                "answer": "United States Military Academy", 
                "answer_id": "m.07x4c", 
                "aliases": [
                    "West Point", 
                    "Army", 
                    "U.S. Military Academy", 
                    "United States Military Academy, main campus", 
                    "United States Military Academy, West Point", 
                    "USMA Staff"
                ]
            }
        ], 
        "created": "2018-02-13T04:35:56"
    }, 
    {
        "ID": "WebQTrn-2706_58572a488e9c026cff464de5c5ed0004", 
        "webqsp_ID": "WebQTrn-2706", 
        "webqsp_question": "what years did the red sox win the world series", 
        "machine_question": "what years did the the team won the 1912 World Series championship win the world series", 
        "question": "What other World Series won by the team that won the 1912 World Series?", 
        "sparql": "PREFIX ns: <http://rdf.freebase.com/ns/>\nSELECT DISTINCT ?x\nWHERE {\nFILTER (?x != ?c)\nFILTER (!isLiteral(?x) OR lang(?x) = '' OR langMatches(lang(?x), 'en'))\n?c ns:sports.sports_team.championships ns:m.04tf98 . \n?c ns:sports.sports_team.championships ?x .\n}\n", 
        "compositionality_type": "composition", 
        "answers": [
            {
                "answer": "1903 World Series", 
                "answer_id": "m.018n8", 
                "aliases": [
                    "1903 World"
                ]
            }, 
            {
                "answer": "2007 World Series", 
                "answer_id": "m.0268bkj", 
                "aliases": [
                    "2007 World"
                ]
            }, 
            {
                "answer": "2004 World Series", 
                "answer_id": "m.044ym6", 
                "aliases": [
                    "2004 World"
                ]
            }, 
            {
                "answer": "1918 World Series", 
                "answer_id": "m.0469hv", 
                "aliases": [
                    "1918 World"
                ]
            }, 
            {
                "answer": "1912 World Series", 
                "answer_id": "m.04tf98", 
                "aliases": [
                    "1912 World"
                ]
            }, 
            {
                "answer": "1916 World Series", 
                "answer_id": "m.04tg7d", 
                "aliases": [
                    "1916 World"
                ]
            }, 
            {
                "answer": "1915 World Series", 
                "answer_id": "m.04tg7r", 
                "aliases": [
                    "1915 World"
                ]
            }, 
            {
                "answer": "2013 World Series", 
                "answer_id": "m.0ds324c", 
                "aliases": [
                    "2013 World"
                ]
            }
        ], 
        "created": "2018-02-13T00:29:25"
    }, 
    {
        "ID": "WebQTrn-3602_b8fcbc1a2e57b5acae3686daffa467f1", 
        "webqsp_ID": "WebQTrn-3602", 
        "webqsp_question": "where did the navajo tribe live", 
        "machine_question": "where did the navajo tribe live and is the tv show Dr Fubalous was filmed there", 
        "question": "What state does the Navajo Tribe live and was where the TV show Dr. Fubalous was filmed?", 
        "sparql": "PREFIX ns: <http://rdf.freebase.com/ns/>\nSELECT DISTINCT ?x\nWHERE {\nFILTER (?x != ns:m.08k5jg)\nFILTER (!isLiteral(?x) OR lang(?x) = '' OR langMatches(lang(?x), 'en'))\nns:m.08k5jg ns:people.ethnicity.geographic_distribution ?x .\n?x ns:tv.tv_location.tv_shows_filmed_here ns:m.0k3br6q . \n}", 
        "compositionality_type": "conjunction", 
        "answers": [
            {
                "answer": "Utah", 
                "answer_id": "m.07srw", 
                "aliases": [
                    "UT", 
                    "Beehive State"
                ]
            }
        ], 
        "created": "2018-02-13T02:14:58"
    }, 
    {
        "ID": "WebQTrn-2237_723ad981dc68e3cfe82e7134c8ca8fdb", 
        "webqsp_ID": "WebQTrn-2237", 
        "webqsp_question": "where to stay in san francisco ca", 
        "machine_question": "where to stay in the location that appointed Gavin Newsom to govermental position", 
        "question": "Where are some places to stay at in the city where Gavin Newson is a government officer?", 
        "sparql": "PREFIX ns: <http://rdf.freebase.com/ns/>\nSELECT DISTINCT ?x\nWHERE {\nFILTER (?x != ?c)\nFILTER (!isLiteral(?x) OR lang(?x) = '' OR langMatches(lang(?x), 'en'))\n?c ns:government.governmental_jurisdiction.governing_officials ?k .\n?k ns:government.government_position_held.appointed_by ns:m.0264nv . \n?c ns:travel.travel_destination.accommodation ?x .\n}\n", 
        "compositionality_type": "composition", 
        "answers": [
            {
                "answer": "W San Francisco", 
                "answer_id": "m.0283jp6", 
                "aliases": [
                    "W Hotel San Francisco"
                ]
            }, 
            {
                "answer": "Hostelling International, City Center", 
                "answer_id": "m.03ywbh3", 
                "aliases": [
                    "Hostelling International, City"
                ]
            }, 
            {
                "answer": "Palace Hotel, San Francisco", 
                "answer_id": "m.0c9ldc", 
                "aliases": []
            }, 
            {
                "answer": "Clift", 
                "answer_id": "m.0f241m", 
                "aliases": [
                    "Clift Hotel, San Francisco"
                ]
            }
        ], 
        "created": "2018-02-12T23:37:20"
    }, 
    {
        "ID": "WebQTest-831_e9f1e2cf7477772e46c8a5c03ad79514", 
        "webqsp_ID": "WebQTest-831", 
        "webqsp_question": "what type of religion does argentina have", 
        "machine_question": "what type of religion does argentina have and the relgion sacred site is Safed", 
        "question": "What region in Argentina that has the sacred site Safed?", 
        "sparql": "PREFIX ns: <http://rdf.freebase.com/ns/>\nSELECT DISTINCT ?x\nWHERE {\nFILTER (?x != ns:m.0jgd)\nFILTER (!isLiteral(?x) OR lang(?x) = '' OR langMatches(lang(?x), 'en'))\nns:m.0jgd ns:location.statistical_region.religions ?y .\n?y ns:location.religion_percentage.religion ?x .\n?x ns:religion.religion.sacred_sites ns:m.01vtnc . \n}", 
        "compositionality_type": "conjunction", 
        "answers": [
            {
                "answer": "Judaism", 
                "answer_id": "m.03_gx", 
                "aliases": [
                    "Jewish"
                ]
            }
        ], 
        "created": "2018-02-13T04:12:56"
    }, 
    {
        "ID": "WebQTest-377_048afa751894ba3400587301a9e1cc7a", 
        "webqsp_ID": "WebQTest-377", 
        "webqsp_question": "what school did michael jordan attend", 
        "machine_question": "what school did the person education institution is Emsley A. Laney High School attend", 
        "question": "What school did the famous person who went to Emsle A. Laney High School attend?", 
        "sparql": "PREFIX ns: <http://rdf.freebase.com/ns/>\nSELECT DISTINCT ?x\nWHERE {\nFILTER (?x != ?c)\nFILTER (!isLiteral(?x) OR lang(?x) = '' OR langMatches(lang(?x), 'en'))\n?c ns:people.person.education ?k .\n?k ns:education.education.institution ns:m.07qymj . \n?c ns:people.person.education ?y .\n?y ns:education.education.institution ?x .\n}\n", 
        "compositionality_type": "composition", 
        "answers": [
            {
                "answer": "Emsley A. Laney High School", 
                "answer_id": "m.07qymj", 
                "aliases": [
                    "Emsley A. Laney High"
                ]
            }, 
            {
                "answer": "University of North Carolina at Chapel Hill", 
                "answer_id": "m.0bx8pn", 
                "aliases": [
                    "University of North Carolina at Chapel Hill, main campus", 
                    "Chapel Hill", 
                    "The University of North Carolina", 
                    "UNC-CH", 
                    "UNC", 
                    "UNC Chapel Hill", 
                    "UNC - Chapel Hill", 
                    "Carolina"
                ]
            }
        ], 
        "created": "2018-02-13T03:24:10"
    }, 
    {
        "ID": "WebQTrn-1594_a3c05545da4808f5bc83ebf51934cd02", 
        "webqsp_ID": "WebQTrn-1594", 
        "webqsp_question": "what two countries speak italian", 
        "machine_question": "what two countries speak italian and is the country that contains Ajdov\u00c5\u00a1\u00c4\u008dina", 
        "question": "What Italian speaking country has Ajdov\u00c5\u00a1\u00c4\u008dina?", 
        "sparql": "PREFIX ns: <http://rdf.freebase.com/ns/>\nSELECT DISTINCT ?x\nWHERE {\nFILTER (?x != ns:m.02bjrlw)\nFILTER (!isLiteral(?x) OR lang(?x) = '' OR langMatches(lang(?x), 'en'))\nns:m.02bjrlw ns:language.human_language.main_country ?x .\n?x ns:location.country.administrative_divisions ns:m.01chh0 . \n}", 
        "compositionality_type": "conjunction", 
        "answers": [
            {
                "answer": "Slovenia", 
                "answer_id": "m.06t8v", 
                "aliases": [
                    "Republic of Slovenia", 
                    "Repubblica di Slovenia", 
                    "Slovania"
                ]
            }
        ], 
        "created": "2018-02-12T22:34:33"
    }, 
    {
        "ID": "WebQTrn-3376_0619d288bbed0ca782e60c6f841a6051", 
        "webqsp_ID": "WebQTrn-3376", 
        "webqsp_question": "where did kevin hart go to school", 
        "machine_question": "where did the person education institution is Castlemont High School go to school", 
        "question": "What colleges did the famous person who went to Castlemont High school go to?", 
        "sparql": "PREFIX ns: <http://rdf.freebase.com/ns/>\nSELECT DISTINCT ?x\nWHERE {\nFILTER (?x != ?c)\nFILTER (!isLiteral(?x) OR lang(?x) = '' OR langMatches(lang(?x), 'en'))\n?c ns:people.person.education ?k .\n?k ns:education.education.institution ns:m.0gy5x53 . \n?c ns:people.person.education ?y .\n?y ns:education.education.institution ?x .\n}\n", 
        "compositionality_type": "composition", 
        "answers": [
            {
                "answer": "Temple University", 
                "answer_id": "m.01jt2w", 
                "aliases": [
                    "TU", 
                    "Temple", 
                    "Temple University, Philadelphia"
                ]
            }, 
            {
                "answer": "Castlemont High School", 
                "answer_id": "m.0gy5x53", 
                "aliases": [
                    "Castlemont High"
                ]
            }
        ], 
        "created": "2018-02-13T01:46:30"
    }, 
    {
        "ID": "WebQTrn-559_71c9708dfb55488256e511b2360fd769", 
        "webqsp_ID": "WebQTrn-559", 
        "webqsp_question": "what college did james franco go to", 
        "machine_question": "what college did james franco go to and the educational institution newspaper is The Yale Herald", 
        "question": "The Yale Herald is the school paper of which university attended by James Franco?", 
        "sparql": "PREFIX ns: <http://rdf.freebase.com/ns/>\nSELECT DISTINCT ?x\nWHERE {\nFILTER (?x != ns:m.05bnp0)\nFILTER (!isLiteral(?x) OR lang(?x) = '' OR langMatches(lang(?x), 'en'))\nns:m.05bnp0 ns:people.person.education ?y .\n?y ns:education.education.institution ?x .\n?x ns:common.topic.notable_types ns:m.01y2hnl .\n?x ns:education.educational_institution.newspaper ns:m.0544pz . \n}", 
        "compositionality_type": "conjunction", 
        "answers": [
            {
                "answer": "University Yale", 
                "answer_id": "m.08815", 
                "aliases": [
                    "Yale University, main campus", 
                    "Yale University", 
                    "Yale University, New Haven", 
                    "YU", 
                    "Yale"
                ]
            }
        ], 
        "created": "2018-02-12T20:43:31"
    }, 
    {
        "ID": "WebQTest-1638_85f381b8012b4def553954906bc9fafb", 
        "webqsp_ID": "WebQTest-1638", 
        "webqsp_question": "what language is most commonly spoken in belgium", 
        "machine_question": "what language is most commonly spoken in the country capital is City of Brussels", 
        "question": "People from the country with the capital Brussels speak what languages?", 
        "sparql": "PREFIX ns: <http://rdf.freebase.com/ns/>\nSELECT DISTINCT ?x\nWHERE {\nFILTER (?x != ?c)\nFILTER (!isLiteral(?x) OR lang(?x) = '' OR langMatches(lang(?x), 'en'))\n?c ns:location.country.capital ns:m.02rnbv . \n?c ns:location.country.official_language ?x .\n}\n", 
        "compositionality_type": "composition", 
        "answers": [
            {
                "answer": "Dutch Language", 
                "answer_id": "m.02bv9", 
                "aliases": [
                    "Nederlandse taal", 
                    "Nederlands", 
                    "Hollands", 
                    "Dutch"
                ]
            }, 
            {
                "answer": "German Language", 
                "answer_id": "m.04306rv", 
                "aliases": [
                    "German, Standard Language", 
                    "Deutsch", 
                    "German", 
                    "Tedesco", 
                    "High German", 
                    "Hochdeutsch", 
                    "German, Standard"
                ]
            }, 
            {
                "answer": "French", 
                "answer_id": "m.064_8sq", 
                "aliases": [
                    "Francais", 
                    "Fran\u00e7ais", 
                    "French", 
                    "French language"
                ]
            }
        ], 
        "created": "2018-02-13T05:42:54"
    }, 
    {
        "ID": "WebQTrn-567_693feb48c0515cd069014e7ca2846b37", 
        "webqsp_ID": "WebQTrn-567", 
        "webqsp_question": "what movies did ron howard do", 
        "machine_question": "what movies did ron howard do and is the film has a charcter named Teklel Hafouli", 
        "question": "What movie with the character Teklel Hafouli did Ron Howard do?", 
        "sparql": "PREFIX ns: <http://rdf.freebase.com/ns/>\nSELECT DISTINCT ?x\nWHERE {\nFILTER (?x != ns:m.0g2lq)\nFILTER (!isLiteral(?x) OR lang(?x) = '' OR langMatches(lang(?x), 'en'))\nns:m.0g2lq ns:film.actor.film ?y .\n?y ns:film.performance.film ?x .\n?x ns:film.film.starring ?c .\n?c ns:film.performance.character ns:m.01064ngx . \n}", 
        "compositionality_type": "conjunction", 
        "answers": [
            {
                "answer": "The Journey", 
                "answer_id": "m.09gf7yk", 
                "aliases": [
                    "Le voyage"
                ]
            }
        ], 
        "created": "2018-02-12T20:44:09"
    }, 
    {
        "ID": "WebQTrn-282_2ef516a3253d8d1d2c28ae11c6d5b2e9", 
        "webqsp_ID": "WebQTrn-282", 
        "webqsp_question": "what money does jamaica use", 
        "machine_question": "what money does the country that contains Trelawny Parish use", 
        "question": "What currency does the country with Trelawny Parish use?", 
        "sparql": "PREFIX ns: <http://rdf.freebase.com/ns/>\nSELECT DISTINCT ?x\nWHERE {\nFILTER (?x != ?c)\nFILTER (!isLiteral(?x) OR lang(?x) = '' OR langMatches(lang(?x), 'en'))\n?c ns:location.country.administrative_divisions ns:m.06qrc3 . \n?c ns:location.country.currency_used ?x .\n}\n", 
        "compositionality_type": "composition", 
        "answers": [
            {
                "answer": "Jamaican dollar", 
                "answer_id": "m.04xc2m", 
                "aliases": []
            }
        ], 
        "created": "2018-02-12T20:11:20"
    }, 
    {
        "ID": "WebQTest-1138_39fbfe61a51d831d2796bf41e2e029f8", 
        "webqsp_ID": "WebQTest-1138", 
        "webqsp_question": "where honduras in the world", 
        "machine_question": "where the country capital is Tegucigalpa in the world", 
        "question": "Where in the world is the country with the capital of Tegucigalpa?", 
        "sparql": "PREFIX ns: <http://rdf.freebase.com/ns/>\nSELECT DISTINCT ?x\nWHERE {\nFILTER (?x != ?c)\nFILTER (!isLiteral(?x) OR lang(?x) = '' OR langMatches(lang(?x), 'en'))\n?c ns:location.country.capital ns:m.0ftld . \n?c ns:location.location.containedby ?x .\n}\n", 
        "compositionality_type": "composition", 
        "answers": [
            {
                "answer": "Central America", 
                "answer_id": "m.01tzh", 
                "aliases": []
            }, 
            {
                "answer": "Latin America", 
                "answer_id": "m.04pnx", 
                "aliases": []
            }, 
            {
                "answer": "North America", 
                "answer_id": "m.059g4", 
                "aliases": []
            }, 
            {
                "answer": "Americas", 
                "answer_id": "m.07c5l", 
                "aliases": [
                    "New World", 
                    "The Americas", 
                    "America"
                ]
            }
        ], 
        "created": "2018-02-13T04:47:19"
    }, 
    {
        "ID": "WebQTest-1698_944664f176791d78aecc08f54a368571", 
        "webqsp_ID": "WebQTest-1698", 
        "webqsp_question": "where do burmese cats originate from", 
        "machine_question": "where do burmese cats originate from and the currency used in the country is Burmese kyat", 
        "question": "What is the country that uses the Burmese kyat as its currency and is also the place of origin of Burmese cats?", 
        "sparql": "PREFIX ns: <http://rdf.freebase.com/ns/>\nSELECT DISTINCT ?x\nWHERE {\nFILTER (?x != ns:m.01mvkt)\nFILTER (!isLiteral(?x) OR lang(?x) = '' OR langMatches(lang(?x), 'en'))\nns:m.01mvkt ns:biology.animal_breed.place_of_origin ?x .\n?x ns:location.country.currency_used ns:m.04r7gc . \n}", 
        "compositionality_type": "conjunction", 
        "answers": [
            {
                "answer": "Myanmar", 
                "answer_id": "m.04xn_", 
                "aliases": [
                    "Burma", 
                    "\u30df\u30e3\u30f3\u30de\u30fc\u9023\u90a6\u5171\u548c\u56fd", 
                    "Myanmar (Burma)", 
                    "Republic of the Union of Myanmar"
                ]
            }
        ], 
        "created": "2018-02-13T05:48:57"
    }, 
    {
        "ID": "WebQTrn-2946_ac8783214291dd6266059cb275378880", 
        "webqsp_ID": "WebQTrn-2946", 
        "webqsp_question": "who did tyson chandler play for", 
        "machine_question": "who did tyson chandler play for and the basket ball team head coach is Rick Carlisle", 
        "question": "Which basketball team has head coach Rick Carlisle and Tyson Chandler played for?", 
        "sparql": "PREFIX ns: <http://rdf.freebase.com/ns/>\nSELECT DISTINCT ?x\nWHERE {\nFILTER (?x != ns:m.05j8c8)\nFILTER (!isLiteral(?x) OR lang(?x) = '' OR langMatches(lang(?x), 'en'))\nns:m.05j8c8 ns:sports.pro_athlete.teams ?y .\n?y ns:sports.sports_team_roster.team ?x .\n?x ns:basketball.basketball_team.head_coach ns:m.02zxw4 . \n}", 
        "compositionality_type": "conjunction", 
        "answers": [
            {
                "answer": "Dallas Mavericks", 
                "answer_id": "m.0jmcv", 
                "aliases": [
                    "Mavs", 
                    "Mavericks"
                ]
            }
        ], 
        "created": "2018-02-13T00:56:07"
    }, 
    {
        "ID": "WebQTrn-432_d722227a6d3fbe0525658c0afef7e182", 
        "webqsp_ID": "WebQTrn-432", 
        "webqsp_question": "what year did lakers win championship", 
        "machine_question": "what year did the organiztion leadership has a person named Jeanie Buss win championship", 
        "question": "What year did the team led by Jeanie Buss win the championship?", 
        "sparql": "PREFIX ns: <http://rdf.freebase.com/ns/>\nSELECT DISTINCT ?x\nWHERE {\nFILTER (?x != ?c)\nFILTER (!isLiteral(?x) OR lang(?x) = '' OR langMatches(lang(?x), 'en'))\n?c ns:organization.organization.leadership ?k .\n?k ns:organization.leadership.person ns:m.0r4zj_6 . \n?c ns:sports.sports_team.championships ?x .\n}\n", 
        "compositionality_type": "composition", 
        "answers": [
            {
                "answer": "2009 NBA Finals", 
                "answer_id": "m.04gg8b0", 
                "aliases": []
            }, 
            {
                "answer": "1980 NBA Finals", 
                "answer_id": "m.08x9_6", 
                "aliases": [
                    "1980 NBA World Championship Series"
                ]
            }, 
            {
                "answer": "2002 NBA Finals", 
                "answer_id": "m.08x9ff", 
                "aliases": []
            }, 
            {
                "answer": "2000 NBA Finals", 
                "answer_id": "m.08x9gt", 
                "aliases": []
            }, 
            {
                "answer": "2001 NBA Finals", 
                "answer_id": "m.08x9hh", 
                "aliases": []
            }, 
            {
                "answer": "1988 NBA Finals", 
                "answer_id": "m.08x9v9", 
                "aliases": []
            }, 
            {
                "answer": "1987 NBA Finals", 
                "answer_id": "m.08x9w1", 
                "aliases": []
            }, 
            {
                "answer": "1985 NBA Finals", 
                "answer_id": "m.08x9x3", 
                "aliases": []
            }, 
            {
                "answer": "1982 NBA Finals", 
                "answer_id": "m.08x9z5", 
                "aliases": []
            }, 
            {
                "answer": "2010 NBA Finals", 
                "answer_id": "m.0bx_x85", 
                "aliases": []
            }, 
            {
                "answer": "1972 NBA Finals", 
                "answer_id": "m.0cs1ny", 
                "aliases": []
            }, 
            {
                "answer": "1954 NBA Finals", 
                "answer_id": "m.0cs2tz", 
                "aliases": []
            }, 
            {
                "answer": "1953 NBA Finals", 
                "answer_id": "m.0cs2wc", 
                "aliases": []
            }, 
            {
                "answer": "1952 NBA Finals", 
                "answer_id": "m.0cs2z5", 
                "aliases": []
            }, 
            {
                "answer": "1950 NBA Finals", 
                "answer_id": "m.0ct7_g", 
                "aliases": []
            }, 
            {
                "answer": "1949 BAA Finals", 
                "answer_id": "m.0ct81k", 
                "aliases": []
            }, 
            {
                "answer": "1948 NBL Finals", 
                "answer_id": "m.0n4cn6w", 
                "aliases": []
            }
        ], 
        "created": "2018-02-12T20:28:36"
    }, 
    {
        "ID": "WebQTrn-1077_0c34ca057060e35aa5c74fbbca682dee", 
        "webqsp_ID": "WebQTrn-1077", 
        "webqsp_question": "what religions are practiced in afghanistan", 
        "machine_question": "what religions are practiced in the country that contains Badakhshan Province", 
        "question": "In the nation that has the Badakhshan province, what religions are practiced?", 
        "sparql": "PREFIX ns: <http://rdf.freebase.com/ns/>\nSELECT DISTINCT ?x\nWHERE {\nFILTER (?x != ?c)\nFILTER (!isLiteral(?x) OR lang(?x) = '' OR langMatches(lang(?x), 'en'))\n?c ns:location.country.administrative_divisions ns:m.04pwfx . \n?c ns:location.statistical_region.religions ?y .\n?y ns:location.religion_percentage.religion ?x .\n}\n", 
        "compositionality_type": "composition", 
        "answers": [
            {
                "answer": "Shia Islam", 
                "answer_id": "m.06pq6", 
                "aliases": [
                    "Shiite"
                ]
            }, 
            {
                "answer": "Sunni Islam", 
                "answer_id": "m.078tg", 
                "aliases": [
                    "sunni muslim", 
                    "Ahl \u016bs-Sunnah", 
                    "Sunnites", 
                    "Ahlas-Sunna-Wal-Jamaa", 
                    "Ahl \u016bs-Sunnah wa \u0101l-\u01e6am\u0101\u02bfah", 
                    "sunni", 
                    "Sunnis"
                ]
            }
        ], 
        "created": "2018-02-12T21:40:31"
    }, 
    {
        "ID": "WebQTrn-3510_8eaf921da3d54168c34794840af9e50a", 
        "webqsp_ID": "WebQTrn-3510", 
        "webqsp_question": "what teams did shaq play 4", 
        "machine_question": "what teams did shaq play 4 and the basket ball team head coach is Brad Stevens", 
        "question": "What team head coached by Brad Stevens did Shaq play for?", 
        "sparql": "PREFIX ns: <http://rdf.freebase.com/ns/>\nSELECT DISTINCT ?x\nWHERE {\nFILTER (?x != ns:m.012xdf)\nFILTER (!isLiteral(?x) OR lang(?x) = '' OR langMatches(lang(?x), 'en'))\nns:m.012xdf ns:sports.pro_athlete.teams ?y .\n?y ns:sports.sports_team_roster.team ?x .\n?x ns:basketball.basketball_team.head_coach ns:m.02qwvmq . \n}", 
        "compositionality_type": "conjunction", 
        "answers": [
            {
                "answer": "Boston Celtics", 
                "answer_id": "m.0bwjj", 
                "aliases": [
                    "Celtics", 
                    "The Green", 
                    "Celts", 
                    "The C's", 
                    "C-Green Smash Machine"
                ]
            }
        ], 
        "created": "2018-02-13T02:07:09"
    }, 
    {
        "ID": "WebQTrn-3643_67d6828a804cdeef38928c85cb93bb03", 
        "webqsp_ID": "WebQTrn-3643", 
        "webqsp_question": "what countries and seas border ukraine", 
        "machine_question": "what countries and seas border the currency used in the country is Ukrainian hryvnia", 
        "question": "Which countries and seas share a border with a country that uses Ukrainian hryvnia as its currency?", 
        "sparql": "#MANUAL SPARQL\nPREFIX ns: <http://rdf.freebase.com/ns/>\nSELECT DISTINCT ?x\nWHERE {\nFILTER (?x != ?c)\nFILTER (!isLiteral(?x) OR (lang(?x) = '' OR lang(?x) = 'en'))\n?c ns:location.country.currency_used ns:m.035qkb . \n?c ns:location.location.adjoin_s ?y .\n?y ns:location.adjoining_relationship.adjoins ?x .\n{ {?x ns:common.topic.notable_types ns:m.01mp .} UNION {?x ns:common.topic.notable_types ns:m.01y2jks .} }\n}\n", 
        "compositionality_type": "composition", 
        "answers": [
            {
                "answer": "Belarus", 
                "answer_id": "m.0163v", 
                "aliases": [
                    "Republic of Belarus", 
                    "Respublika Belarus\u2019", 
                    "Bellarussiya", 
                    "Bielaru\u015b"
                ]
            }, 
            {
                "answer": "Hungary", 
                "answer_id": "m.03gj2", 
                "aliases": [
                    "Magyarorsz\u00e1g", 
                    "Hungary, Europe"
                ]
            }, 
            {
                "answer": "Moldova", 
                "answer_id": "m.04w4s", 
                "aliases": [
                    "Moldavia", 
                    "Republic of Moldova"
                ]
            }, 
            {
                "answer": "Poland", 
                "answer_id": "m.05qhw", 
                "aliases": [
                    "Polska", 
                    "Republic of Poland"
                ]
            }, 
            {
                "answer": "Russia", 
                "answer_id": "m.06bnz", 
                "aliases": [
                    "Russian Federation", 
                    "\u0420\u043e\u0441\u0441\u0438\u044f"
                ]
            }, 
            {
                "answer": "Romania", 
                "answer_id": "m.06c1y", 
                "aliases": [
                    "Rom\u00e2nia"
                ]
            }, 
            {
                "answer": "Slovakia", 
                "answer_id": "m.06npd", 
                "aliases": [
                    "Slovensko", 
                    "The Slovak Republic"
                ]
            }
        ], 
        "created": "2018-02-13T02:17:39"
    }, 
    {
        "ID": "WebQTrn-611_dacbec08f8d31829038751934850ed95", 
        "webqsp_ID": "WebQTrn-611", 
        "webqsp_question": "what position did george washington serve in the constitutional convention", 
        "machine_question": "what position did the architect that desinged Mount Vernon serve in the constitutional convention", 
        "question": "In the Constitutional Convention, what role did the architect who designed Mount Vernon serve?", 
        "sparql": "PREFIX ns: <http://rdf.freebase.com/ns/>\nSELECT DISTINCT ?x\nWHERE {\nFILTER (?x != ?c)\nFILTER (!isLiteral(?x) OR lang(?x) = '' OR langMatches(lang(?x), 'en'))\n?c ns:architecture.architect.structures_designed ns:m.013v2f . \n?c ns:government.politician.government_positions_held ?y .\n?y ns:government.government_position_held.office_position_or_title ?x .\n?y ns:government.government_position_held.governmental_body ns:m.09k5k .\n}\n", 
        "compositionality_type": "composition", 
        "answers": [
            {
                "answer": "Delegate to the Continental Congress", 
                "answer_id": "m.09ryhrh", 
                "aliases": []
            }
        ], 
        "created": "2018-02-12T20:47:58"
    }, 
    {
        "ID": "WebQTest-1819_9be8c18e016b713cbb7f7feb6badebc7", 
        "webqsp_ID": "WebQTest-1819", 
        "webqsp_question": "what religion does canada follow", 
        "machine_question": "what religion does canada follow and the religion text is The Bible", 
        "question": "What religion does Canada follow with a religious text called The Bible?", 
        "sparql": "PREFIX ns: <http://rdf.freebase.com/ns/>\nSELECT DISTINCT ?x\nWHERE {\nFILTER (?x != ns:m.0d060g)\nFILTER (!isLiteral(?x) OR lang(?x) = '' OR langMatches(lang(?x), 'en'))\nns:m.0d060g ns:location.statistical_region.religions ?y .\n?y ns:location.religion_percentage.religion ?x .\n?x ns:religion.religion.texts ns:m.015j7 . \n}", 
        "compositionality_type": "conjunction", 
        "answers": [
            {
                "answer": "Protestantism", 
                "answer_id": "m.05sfs", 
                "aliases": [
                    "Protestant"
                ]
            }, 
            {
                "answer": "Catholicism", 
                "answer_id": "m.0c8wxp", 
                "aliases": [
                    "Roman Catholic convert", 
                    "Roman Catholic"
                ]
            }
        ], 
        "created": "2018-02-13T06:04:24"
    }, 
    {
        "ID": "WebQTest-670_af0a37b13a66138a543af50c2ac24bb8", 
        "webqsp_ID": "WebQTest-670", 
        "webqsp_question": "what kind of language does egypt speak", 
        "machine_question": "what kind of language does the location that appointed Adly Mansour to govermental position speak", 
        "question": "What is the language spoken where Adly Mansour holds a government position?", 
        "sparql": "PREFIX ns: <http://rdf.freebase.com/ns/>\nSELECT DISTINCT ?x\nWHERE {\nFILTER (?x != ?c)\nFILTER (!isLiteral(?x) OR lang(?x) = '' OR langMatches(lang(?x), 'en'))\n?c ns:government.governmental_jurisdiction.governing_officials ?k .\n?k ns:government.government_position_held.appointed_by ns:m.0w5nf92 . \n?c ns:location.country.official_language ?x .\n}\n", 
        "compositionality_type": "composition", 
        "answers": [
            {
                "answer": "Modern Standard Arabic", 
                "answer_id": "m.025rvv7", 
                "aliases": [
                    "High Arabic", 
                    "Fasih", 
                    "Modern Literary Arabic", 
                    "Arabic, Standard", 
                    "Al Arabiya", 
                    "Al Fus-ha"
                ]
            }
        ], 
        "created": "2018-02-13T03:58:35"
    }, 
    {
        "ID": "WebQTest-1686_29e74083744b3631541b29b4094fb273", 
        "webqsp_ID": "WebQTest-1686", 
        "webqsp_question": "who is the governor of arizona 2009", 
        "machine_question": "who is the governor of arizona 2009 and held his govermental position from before 1998", 
        "question": "Who was the governor of Arizona in 2009 that held his governmental position before 1998?", 
        "sparql": "PREFIX ns: <http://rdf.freebase.com/ns/>\nSELECT DISTINCT ?x\nWHERE {\nFILTER (?x != ns:m.0vmt)\nFILTER (!isLiteral(?x) OR lang(?x) = '' OR langMatches(lang(?x), 'en'))\nns:m.0vmt ns:government.governmental_jurisdiction.governing_officials ?y .\n?y ns:government.government_position_held.office_holder ?x .\n?y ns:government.government_position_held.basic_title ns:m.0fkvn .\nFILTER(NOT EXISTS {?y ns:government.government_position_held.from ?sk0} || \nEXISTS {?y ns:government.government_position_held.from ?sk1 . \nFILTER(xsd:datetime(?sk1) <= \"2009-12-31\"^^xsd:dateTime) })\nFILTER(NOT EXISTS {?y ns:government.government_position_held.to ?sk2} || \nEXISTS {?y ns:government.government_position_held.to ?sk3 . \nFILTER(xsd:datetime(?sk3) >= \"2009-01-01\"^^xsd:dateTime) })\n?x ns:government.politician.government_positions_held ?c .\n?c ns:government.government_position_held.from ?num .\nFILTER (?num < \"1998\"^^xsd:dateTime) . \n}", 
        "compositionality_type": "comparative", 
        "answers": [
            {
                "answer": "Janet Napolitano", 
                "answer_id": "m.01kf06", 
                "aliases": [
                    "Janet Ann Napolitano"
                ]
            }
        ], 
        "created": "2018-02-13T05:48:37"
    }, 
    {
        "ID": "WebQTrn-1036_21286e9775945dae1c8dd9dd06228073", 
        "webqsp_ID": "WebQTrn-1036", 
        "webqsp_question": "who is the leader of france 2012", 
        "machine_question": "who is the leader of france 2012 and held his govermental position from before 2007-05-16", 
        "question": "Who is the leader of France in 2012 who held the governmental position prior to 5-16-2007?", 
        "sparql": "PREFIX ns: <http://rdf.freebase.com/ns/>\nSELECT DISTINCT ?x\nWHERE {\nFILTER (?x != ns:m.0f8l9c)\nFILTER (!isLiteral(?x) OR lang(?x) = '' OR langMatches(lang(?x), 'en'))\nns:m.0f8l9c ns:government.governmental_jurisdiction.governing_officials ?y .\n?y ns:government.government_position_held.office_holder ?x .\n?y ns:government.government_position_held.basic_title ns:m.060c4 .\nFILTER(NOT EXISTS {?y ns:government.government_position_held.from ?sk0} || \nEXISTS {?y ns:government.government_position_held.from ?sk1 . \nFILTER(xsd:datetime(?sk1) <= \"2012-12-31\"^^xsd:dateTime) })\nFILTER(NOT EXISTS {?y ns:government.government_position_held.to ?sk2} || \nEXISTS {?y ns:government.government_position_held.to ?sk3 . \nFILTER(xsd:datetime(?sk3) >= \"2012-01-01\"^^xsd:dateTime) })\n?x ns:government.politician.government_positions_held ?c .\n?c ns:government.government_position_held.from ?num .\nFILTER (?num < \"2007-05-16\"^^xsd:dateTime) . \n}", 
        "compositionality_type": "comparative", 
        "answers": [
            {
                "answer": "Fran\u00e7ois Hollande", 
                "answer_id": "m.02ps9k", 
                "aliases": [
                    "Hyperpresident", 
                    "The Bling Bling President", 
                    "Sarko", 
                    "Nicolas Paul St\u00e9phane Sark\u00f6zy de Nagy-Bocsa", 
                    "Speedy", 
                    "Sarko l'Am\u00e9ricain"
                ]
            }, 
            {
                "answer": "Nicolas Sarkozy", 
                "answer_id": "m.02qg4z", 
                "aliases": [
                    "Fran\u00e7ois G\u00e9rard Georges Hollande", 
                    "Mayor Fran\u00e7ois Hollande", 
                    "Francois Hollande"
                ]
            }
        ], 
        "created": "2018-02-12T21:35:05"
    }, 
    {
        "ID": "WebQTest-1441_bb949340bcc140182ac61775c7ccc0e9", 
        "webqsp_ID": "WebQTest-1441", 
        "webqsp_question": "where all did picasso live", 
        "machine_question": "where all did the illustrator of the book Feu de joie live", 
        "question": "Where was the home of the illustrator of \"Feu de Joie\"?", 
        "sparql": "PREFIX ns: <http://rdf.freebase.com/ns/>\nSELECT DISTINCT ?x\nWHERE {\nFILTER (?x != ?c)\nFILTER (!isLiteral(?x) OR lang(?x) = '' OR langMatches(lang(?x), 'en'))\n?c ns:book.illustrator.books_illustrated ns:m.0678xv0 . \n?c ns:people.person.places_lived ?y .\n?y ns:people.place_lived.location ?x .\n}\n", 
        "compositionality_type": "composition", 
        "answers": [
            {
                "answer": "M\u00e1laga", 
                "answer_id": "m.01978d", 
                "aliases": [
                    "Malaga"
                ]
            }, 
            {
                "answer": "Madrid", 
                "answer_id": "m.056_y", 
                "aliases": [
                    "Madrid, Spain", 
                    "Villa de Madrid"
                ]
            }, 
            {
                "answer": "France", 
                "answer_id": "m.0f8l9c", 
                "aliases": [
                    "l'Hexagone", 
                    "R\u00e9publique fran\u00e7aise", 
                    "French Republic"
                ]
            }
        ], 
        "created": "2018-02-13T05:21:18"
    }, 
    {
        "ID": "WebQTrn-3160_de764c65ac3c6a870a407dd9cafd0dc9", 
        "webqsp_ID": "WebQTrn-3160", 
        "webqsp_question": "what language do brazil speak", 
        "machine_question": "what language do the currency used in the country is Brazilian real speak", 
        "question": "Which language is spoken, where the currency used in the country is the Brazilian real, utilize?", 
        "sparql": "PREFIX ns: <http://rdf.freebase.com/ns/>\nSELECT DISTINCT ?x\nWHERE {\nFILTER (?x != ?c)\nFILTER (!isLiteral(?x) OR lang(?x) = '' OR langMatches(lang(?x), 'en'))\n?c ns:location.country.currency_used ns:m.03385m . \n?c ns:location.country.languages_spoken ?x .\n}\n", 
        "compositionality_type": "composition", 
        "answers": [
            {
                "answer": "Italian Language", 
                "answer_id": "m.02bjrlw", 
                "aliases": [
                    "Italiano", 
                    "Italian"
                ]
            }, 
            {
                "answer": "Brazilian Portuguese", 
                "answer_id": "m.02zj58", 
                "aliases": []
            }, 
            {
                "answer": "Portuguese Language", 
                "answer_id": "m.05zjd", 
                "aliases": [
                    "Portuguese", 
                    "Portugese", 
                    "Portuguese language", 
                    "Portugu\u00eas"
                ]
            }
        ], 
        "created": "2018-02-13T01:21:30"
    }, 
    {
        "ID": "WebQTest-814_c79b70efb49f418dcbb1aa6f62b56d79", 
        "webqsp_ID": "WebQTest-814", 
        "webqsp_question": "where is harley davidson corporate headquarters", 
        "machine_question": "where is the child organization is H D Tomahawk Kaphaem Road LLC corporate headquarters", 
        "question": "What state is the headquarters of H D Tomahawk Kaphaem Road LLC?", 
        "sparql": "PREFIX ns: <http://rdf.freebase.com/ns/>\nSELECT DISTINCT ?x\nWHERE {\nFILTER (?x != ?c)\nFILTER (!isLiteral(?x) OR lang(?x) = '' OR langMatches(lang(?x), 'en'))\n?c ns:organization.organization.child ?k .\n?k ns:organization.organization_relationship.child ns:m.09mqm6y . \n?c ns:organization.organization.headquarters ?y .\n?y ns:location.mailing_address.citytown ?x .\n}\n", 
        "compositionality_type": "composition", 
        "answers": [
            {
                "answer": "Milwaukee", 
                "answer_id": "m.0dyl9", 
                "aliases": [
                    "Milwaukee, Wisconsin", 
                    "Waukesha County / Milwaukee city"
                ]
            }
        ], 
        "created": "2018-02-13T04:12:04"
    }, 
    {
        "ID": "WebQTrn-3401_75e46121bded1ab4f276d4ec24bb366e", 
        "webqsp_ID": "WebQTrn-3401", 
        "webqsp_question": "what are the two major religions in canada", 
        "machine_question": "what are the two major religions in canada and is the religion types of places of worship include Chapel", 
        "question": "What major religion in Canada has the Chapel as a place of worship?", 
        "sparql": "PREFIX ns: <http://rdf.freebase.com/ns/>\nSELECT DISTINCT ?x\nWHERE {\nFILTER (?x != ns:m.0d060g)\nFILTER (!isLiteral(?x) OR lang(?x) = '' OR langMatches(lang(?x), 'en'))\nns:m.0d060g ns:location.statistical_region.religions ?y .\n?y ns:location.religion_percentage.religion ?x .\n?x ns:religion.religion.types_of_places_of_worship ns:m.0173tc . \n}", 
        "compositionality_type": "conjunction", 
        "answers": [
            {
                "answer": "Catholicism", 
                "answer_id": "m.0c8wxp", 
                "aliases": [
                    "Roman Catholic convert", 
                    "Roman Catholic"
                ]
            }
        ], 
        "created": "2018-02-13T01:52:08"
    }, 
    {
        "ID": "WebQTest-626_8c6b952c6bd963f0ece4e401c9eb731a", 
        "webqsp_ID": "WebQTest-626", 
        "webqsp_question": "what does the missouri river bisect", 
        "machine_question": "what does the missouri river bisect and the location time zone is Central Time Zone", 
        "question": "What does the Missouri River bisect in the Central Time Zone?", 
        "sparql": "PREFIX ns: <http://rdf.freebase.com/ns/>\nSELECT DISTINCT ?x\nWHERE {\nFILTER (?x != ns:m.04ykz)\nFILTER (!isLiteral(?x) OR lang(?x) = '' OR langMatches(lang(?x), 'en'))\nns:m.04ykz ns:location.location.partially_contained_by ?y .\n?y ns:location.partial_containment_relationship.partially_contained_by ?x .\n?x ns:location.location.time_zones ns:m.02fqwt . \n}", 
        "compositionality_type": "conjunction", 
        "answers": [
            {
                "answer": "Iowa", 
                "answer_id": "m.03s0w", 
                "aliases": [
                    "IA", 
                    "Hawkeye State", 
                    "IO"
                ]
            }, 
            {
                "answer": "Kansas", 
                "answer_id": "m.0488g", 
                "aliases": [
                    "KS", 
                    "KA", 
                    "Kans"
                ]
            }, 
            {
                "answer": "Missouri", 
                "answer_id": "m.04ych", 
                "aliases": [
                    "MO", 
                    "Show-Me State"
                ]
            }, 
            {
                "answer": "Nebraska", 
                "answer_id": "m.05fhy", 
                "aliases": [
                    "The Cornhusker State", 
                    "NB", 
                    "Neb", 
                    "NE"
                ]
            }, 
            {
                "answer": "North Dakota", 
                "answer_id": "m.05fky", 
                "aliases": [
                    "Peace Garden State", 
                    "N Dak", 
                    "ND"
                ]
            }, 
            {
                "answer": "South Dakota", 
                "answer_id": "m.06mz5", 
                "aliases": [
                    "S Dak", 
                    "Mount Rushmore State", 
                    "SD"
                ]
            }
        ], 
        "created": "2018-02-13T03:50:57"
    }, 
    {
        "ID": "WebQTest-549_0e0e643968043bbec341e626ba0a5321", 
        "webqsp_ID": "WebQTest-549", 
        "webqsp_question": "what are the official languages of the eu", 
        "machine_question": "what are the official languages of the the organization that has the leadership role of President of the European Parliament", 
        "question": "What languages are officially spoken in the organization that includes a leadership role called President of the European Parliament?", 
        "sparql": "PREFIX ns: <http://rdf.freebase.com/ns/>\nSELECT DISTINCT ?x\nWHERE {\nFILTER (?x != ?c)\nFILTER (!isLiteral(?x) OR lang(?x) = '' OR langMatches(lang(?x), 'en'))\n?c ns:organization.organization.leadership ?k .\n?k ns:organization.leadership.role ns:m.039h0j . \n?c ns:user.ktrueman.default_domain.international_organization.official_language_s ?x .\n}\n", 
        "compositionality_type": "composition", 
        "answers": [
            {
                "answer": "Italian Language", 
                "answer_id": "m.02bjrlw", 
                "aliases": [
                    "Italiano", 
                    "Italian"
                ]
            }, 
            {
                "answer": "Dutch Language", 
                "answer_id": "m.02bv9", 
                "aliases": [
                    "Nederlandse taal", 
                    "Nederlands", 
                    "Hollands", 
                    "Dutch"
                ]
            }, 
            {
                "answer": "English Language", 
                "answer_id": "m.02h40lc", 
                "aliases": [
                    "Sekgoa", 
                    "Anglit", 
                    "English language", 
                    "English"
                ]
            }, 
            {
                "answer": "Greek Language", 
                "answer_id": "m.0349s", 
                "aliases": [
                    "Graecae", 
                    "Neo-hellenic", 
                    "Greek", 
                    "Greco", 
                    "Modern Greek (1453-)", 
                    "Romaic", 
                    "Grec", 
                    "Ellinika"
                ]
            }, 
            {
                "answer": "German Language", 
                "answer_id": "m.04306rv", 
                "aliases": [
                    "German, Standard Language", 
                    "Deutsch", 
                    "German", 
                    "Tedesco", 
                    "High German", 
                    "Hochdeutsch", 
                    "German, Standard"
                ]
            }, 
            {
                "answer": "Polish Language", 
                "answer_id": "m.05qqm", 
                "aliases": [
                    "Polnisch", 
                    "Polish", 
                    "Polish language", 
                    "Polski"
                ]
            }, 
            {
                "answer": "Portuguese Language", 
                "answer_id": "m.05zjd", 
                "aliases": [
                    "Portuguese", 
                    "Portugese", 
                    "Portuguese language", 
                    "Portugu\u00eas"
                ]
            }, 
            {
                "answer": "French", 
                "answer_id": "m.064_8sq", 
                "aliases": [
                    "Francais", 
                    "Fran\u00e7ais", 
                    "French", 
                    "French language"
                ]
            }, 
            {
                "answer": "Swedish Language", 
                "answer_id": "m.06mp7", 
                "aliases": [
                    "Swedish", 
                    "Ruotsi", 
                    "Svenska"
                ]
            }, 
            {
                "answer": "Spanish Language", 
                "answer_id": "m.06nm1", 
                "aliases": [
                    "Espa\u00f1ol", 
                    "Spanish language", 
                    "Castillian", 
                    "Spanish", 
                    "The language of Cervantes", 
                    "Castellano", 
                    "Castillan", 
                    "Castilian"
                ]
            }
        ], 
        "created": "2018-02-13T03:45:16"
    }, 
    {
        "ID": "WebQTrn-1990_7908249e74016480bf86049c6f387264", 
        "webqsp_ID": "WebQTrn-1990", 
        "webqsp_question": "what is st mary mascot", 
        "machine_question": "what is the education institution has a sports team named Saint Mary's Gaels men's basketball mascot", 
        "question": "What is the mascot of the school that has Saint Mary's Gaels men's basketball?", 
        "sparql": "PREFIX ns: <http://rdf.freebase.com/ns/>\nSELECT DISTINCT ?x\nWHERE {\nFILTER (?x != ?c)\nFILTER (!isLiteral(?x) OR lang(?x) = '' OR langMatches(lang(?x), 'en'))\n?c ns:education.educational_institution.sports_teams ns:m.0dlk29f . \n?c ns:education.educational_institution.mascot ?x .\n}\n", 
        "compositionality_type": "composition", 
        "answers": [
            {
                "answer": "Saint Mary's College of California Gael", 
                "answer_id": "m.05k68lf", 
                "aliases": [
                    "Gael", 
                    "Gael Force One"
                ]
            }
        ], 
        "created": "2018-02-12T23:14:01"
    }, 
    {
        "ID": "WebQTest-502_d1c3916f5033e76661c6b7dcc1d98298", 
        "webqsp_ID": "WebQTest-502", 
        "webqsp_question": "where did al qaeda attack", 
        "machine_question": "where did the organiztion leadership has a person named Ayman al-Zawahiri attack", 
        "question": "Where did the group who has someone in leadership named Ayman al-Zawahiri attack?", 
        "sparql": "PREFIX ns: <http://rdf.freebase.com/ns/>\nSELECT DISTINCT ?x\nWHERE {\nFILTER (?x != ?c)\nFILTER (!isLiteral(?x) OR lang(?x) = '' OR langMatches(lang(?x), 'en'))\n?c ns:organization.organization.leadership ?k .\n?k ns:organization.leadership.person ns:m.01vcb_ . \n?c ns:base.disaster2.attacker.attack_s ?y .\n?y ns:base.disaster2.attack_process.attack_event ?x .\n?y ns:base.disaster2.attack_process.attacker ?c .\n}\n", 
        "compositionality_type": "composition", 
        "answers": [
            {
                "answer": "Taliban insurgency", 
                "answer_id": "m.0c6cwg", 
                "aliases": []
            }, 
            {
                "answer": "September 11 attacks", 
                "answer_id": "m.0d0vp3", 
                "aliases": [
                    "9/11", 
                    "September 11th", 
                    "September 11"
                ]
            }
        ], 
        "created": "2018-02-13T03:37:30"
    }, 
    {
        "ID": "WebQTrn-772_c4e06c3a9e4b4f10bd1ae97f1742c198", 
        "webqsp_ID": "WebQTrn-772", 
        "webqsp_question": "who did the baltimore ravens draft in 2011", 
        "machine_question": "who did the the team won the 2013 AFC Championship Game championship draft in 2011", 
        "question": "Who was drafted in 2011 by the football squad that claimed the 2013 AFC Championship Game championship?", 
        "sparql": "PREFIX ns: <http://rdf.freebase.com/ns/>\nSELECT DISTINCT ?x\nWHERE {\nFILTER (?x != ?c)\nFILTER (!isLiteral(?x) OR lang(?x) = '' OR langMatches(lang(?x), 'en'))\n?c ns:sports.sports_team.championships ns:m.0_gtz8t . \n?c ns:sports.professional_sports_team.draft_picks ?y .\n?y ns:sports.sports_league_draft_pick.player ?x .\n?y ns:sports.sports_league_draft_pick.draft ns:m.05sys3j .\n}\n", 
        "compositionality_type": "composition", 
        "answers": [
            {
                "answer": "Jimmy Smith", 
                "answer_id": "m.0drxh6r", 
                "aliases": [
                    "Beans", 
                    "James Smith"
                ]
            }
        ], 
        "created": "2018-02-12T21:01:10"
    }, 
    {
        "ID": "WebQTrn-2168_68fba8368df97965e65b7f3943b9a4b8", 
        "webqsp_ID": "WebQTrn-2168", 
        "webqsp_question": "who played betty rizzo in grease", 
        "machine_question": "who played betty rizzo in the film has a charcter named Girl Fixing Hair in Mirror at Drive-in", 
        "question": "In the movie that has a girl fixing a mirror at the drive in as a character, who played Betty Rizzo?", 
        "sparql": "PREFIX ns: <http://rdf.freebase.com/ns/>\nSELECT DISTINCT ?x\nWHERE {\nFILTER (?x != ?c)\nFILTER (!isLiteral(?x) OR lang(?x) = '' OR langMatches(lang(?x), 'en'))\n?c ns:film.film.starring ?k .\n?k ns:film.performance.character ns:m.0y5cjv4 . \n?c ns:film.film.starring ?y .\n?y ns:film.performance.actor ?x .\n?y ns:film.performance.character ns:m.0fqbs6 .\n}\n", 
        "compositionality_type": "composition", 
        "answers": [
            {
                "answer": "Stockard Channing", 
                "answer_id": "m.02mqc4", 
                "aliases": [
                    "Susan Williams Antonia Stockard", 
                    "Susan Antonia Williams Stockard", 
                    "Susan Stockard"
                ]
            }
        ], 
        "created": "2018-02-12T23:31:21"
    }, 
    {
        "ID": "WebQTrn-2356_d47235946e6c9112db92fd6fbb6e26b3", 
        "webqsp_ID": "WebQTrn-2356", 
        "webqsp_question": "what year did the mets win their first world series", 
        "machine_question": "what year did the the team won the 1969 World Series championship win their first world series", 
        "question": "In what year did the team that won the 1969 World Series championship win their first World Series?", 
        "sparql": "PREFIX ns: <http://rdf.freebase.com/ns/>\nSELECT DISTINCT ?x\nWHERE {\nFILTER (?x != ?c)\nFILTER (!isLiteral(?x) OR lang(?x) = '' OR langMatches(lang(?x), 'en'))\n?c ns:sports.sports_team.championships ns:m.04jg9_ . \n?c ns:sports.sports_team.championships ?x .\n?x ns:sports.sports_championship_event.championship ns:m.0fjp3 .\n?x ns:time.event.start_date ?sk0 .\n}\nORDER BY xsd:datetime(?sk0)\nLIMIT 1\n", 
        "compositionality_type": "composition", 
        "answers": [
            {
                "answer": "1969 World Series", 
                "answer_id": "m.04jg9_", 
                "aliases": [
                    "1969 World"
                ]
            }
        ], 
        "created": "2018-02-12T23:49:16"
    }, 
    {
        "ID": "WebQTest-1137_cc64b3264c8839a0cbd15502632b2302", 
        "webqsp_ID": "WebQTest-1137", 
        "webqsp_question": "where is the illinois river on a map", 
        "machine_question": "where is the illinois river on a map and is the us state that has a capital named Springfield", 
        "question": "What US state has a capital named Springfield and also the Illinois River?", 
        "sparql": "PREFIX ns: <http://rdf.freebase.com/ns/>\nSELECT DISTINCT ?x\nWHERE {\nFILTER (?x != ns:m.0j1qb)\nFILTER (!isLiteral(?x) OR lang(?x) = '' OR langMatches(lang(?x), 'en'))\nns:m.0j1qb ns:location.location.containedby ?x .\n?x ns:location.us_state.capital ns:m.0ftxc . \n}", 
        "compositionality_type": "conjunction", 
        "answers": [
            {
                "answer": "Illinois", 
                "answer_id": "m.03v0t", 
                "aliases": [
                    "Ill", 
                    "Land of Lincoln", 
                    "IL", 
                    "IL, Ill."
                ]
            }
        ], 
        "created": "2018-02-13T04:47:11"
    }, 
    {
        "ID": "WebQTest-779_c352f5de0efe2369ee74ef2a99973561", 
        "webqsp_ID": "WebQTest-779", 
        "webqsp_question": "where does carlos santana live", 
        "machine_question": "where does carlos santana live and is the pro athlete born here that started his career 2007", 
        "question": "Where does Carlos Santana live, and who's the pro athlete born here, that began his career in 2007?", 
        "sparql": "PREFIX ns: <http://rdf.freebase.com/ns/>\nSELECT DISTINCT ?x\nWHERE {\nFILTER (?x != ns:m.01304j)\nFILTER (!isLiteral(?x) OR lang(?x) = '' OR langMatches(lang(?x), 'en'))\nns:m.01304j ns:people.person.places_lived ?y .\n?y ns:people.place_lived.location ?x .\n?x ns:location.location.people_born_here ?c .\n?c ns:sports.pro_athlete.career_start \"2007\"^^xsd:dateTime . \n}", 
        "compositionality_type": "conjunction", 
        "answers": [
            {
                "answer": "San Francisco", 
                "answer_id": "m.0d6lp", 
                "aliases": [
                    "San Francisco, Calif.", 
                    "Esseff", 
                    "San Fran, Frisco, The City, City by the Bay", 
                    "Baghdad by the Bay", 
                    "SanFran", 
                    "San Francisco, CA", 
                    "City by the Bay - San Francisco", 
                    "San Francisco County, California", 
                    "San Francisco, California", 
                    "Frisco", 
                    "The City", 
                    "SF", 
                    "The City by the Bay"
                ]
            }
        ], 
        "created": "2018-02-13T04:08:40"
    }, 
    {
        "ID": "WebQTrn-138_2cd19fe19673246a9f45fd8d54047e5a", 
        "webqsp_ID": "WebQTrn-138", 
        "webqsp_question": "what bible does the catholic church follow", 
        "machine_question": "what bible does the the religion belief is Virgin birth of Jesus church follow", 
        "question": "Which bibles go according to the religious belief in the Virgin birth of Jesus?", 
        "sparql": "PREFIX ns: <http://rdf.freebase.com/ns/>\nSELECT DISTINCT ?x\nWHERE {\nFILTER (?x != ?c)\nFILTER (!isLiteral(?x) OR lang(?x) = '' OR langMatches(lang(?x), 'en'))\n?c ns:religion.religion.beliefs ns:m.012lvl . \n?c ns:religion.religion.texts ?x .\n}\n", 
        "compositionality_type": "composition", 
        "answers": [
            {
                "answer": "The Bible", 
                "answer_id": "m.015j7", 
                "aliases": [
                    "Christian Bible", 
                    "Holy Bible", 
                    "Bible"
                ]
            }, 
            {
                "answer": "Book of Nehemiah", 
                "answer_id": "m.01dfl", 
                "aliases": [
                    "Second Book of Ezra"
                ]
            }, 
            {
                "answer": "New Testament", 
                "answer_id": "m.05crg", 
                "aliases": []
            }, 
            {
                "answer": "Old Testament", 
                "answer_id": "m.05ld9", 
                "aliases": []
            }
        ], 
        "created": "2018-02-12T19:51:14"
    }, 
    {
        "ID": "WebQTrn-2455_927cd1e3ebad2c29a4e485da8210de8c", 
        "webqsp_ID": "WebQTrn-2455", 
        "webqsp_question": "what school did kurt vonnegut go to", 
        "machine_question": "what school did kurt vonnegut go to and the educational institution newspaper is The Tartan", 
        "question": "What college did Kurt Vonnegut attend that has the newspaper The Tartan?", 
        "sparql": "PREFIX ns: <http://rdf.freebase.com/ns/>\nSELECT DISTINCT ?x\nWHERE {\nFILTER (?x != ns:m.049gc)\nFILTER (!isLiteral(?x) OR lang(?x) = '' OR langMatches(lang(?x), 'en'))\nns:m.049gc ns:people.person.education ?y .\n?y ns:education.education.institution ?x .\n?x ns:education.educational_institution.newspaper ns:m.02z3cj . \n}", 
        "compositionality_type": "conjunction", 
        "answers": [
            {
                "answer": "Carnegie Mellon University", 
                "answer_id": "m.0cwx_", 
                "aliases": [
                    "Carnegie Mellon", 
                    "CMU", 
                    "Carnegie Mellon University, Pittsburgh", 
                    "Carnegie Mellon University, Pittsburgh Campus"
                ]
            }
        ], 
        "created": "2018-02-12T23:59:03"
    }, 
    {
        "ID": "WebQTest-12_68d745a0657c86906382873e57294d6a", 
        "webqsp_ID": "WebQTest-12", 
        "webqsp_question": "who is governor of ohio 2011", 
        "machine_question": "who is governor of ohio 2011 and held his govermental position from before 1983-01-03", 
        "question": "Who was the governor of Ohio in 2011 that was in the government prior to 3-1-1983?", 
        "sparql": "PREFIX ns: <http://rdf.freebase.com/ns/>\nSELECT DISTINCT ?x\nWHERE {\nFILTER (?x != ns:m.05kkh)\nFILTER (!isLiteral(?x) OR lang(?x) = '' OR langMatches(lang(?x), 'en'))\nns:m.05kkh ns:government.governmental_jurisdiction.governing_officials ?y .\n?y ns:government.government_position_held.office_holder ?x .\n?y ns:government.government_position_held.basic_title ns:m.0fkvn .\nFILTER(NOT EXISTS {?y ns:government.government_position_held.from ?sk0} || \nEXISTS {?y ns:government.government_position_held.from ?sk1 . \nFILTER(xsd:datetime(?sk1) <= \"2011-12-31\"^^xsd:dateTime) })\nFILTER(NOT EXISTS {?y ns:government.government_position_held.to ?sk2} || \nEXISTS {?y ns:government.government_position_held.to ?sk3 . \nFILTER(xsd:datetime(?sk3) >= \"2011-01-01\"^^xsd:dateTime) })\n?x ns:government.politician.government_positions_held ?c .\n?c ns:government.government_position_held.from ?num .\nFILTER (?num < \"1983-01-03\"^^xsd:dateTime) . \n}", 
        "compositionality_type": "comparative", 
        "answers": [
            {
                "answer": "Return J. Meigs, Jr.", 
                "answer_id": "m.0340r0", 
                "aliases": [
                    "Return Jonathan Meigs, Jr.", 
                    "Return Jonathan Meigs", 
                    "Return Meigs, Jr."
                ]
            }, 
            {
                "answer": "John Kasich", 
                "answer_id": "m.02zzm_", 
                "aliases": []
            }
        ], 
        "created": "2018-02-13T02:38:13"
    }, 
    {
        "ID": "WebQTest-426_0642f30e974b46ce4bcdb74f0546d0f7", 
        "webqsp_ID": "WebQTest-426", 
        "webqsp_question": "where is giza pyramids located", 
        "machine_question": "where is giza pyramids located and is the location that appointed Hosni Mubarak to govermental position", 
        "question": "Where are the Giza Pyramids located that appointed Hosni Mubarak to a governmental position?",
[truncated: 41,598,888 more chars]
